# Supplementary material for: Comparison of time and dose dependent gene expression and affected pathways in primary human fibroblasts after exposure to ionizing radiation
Source: PubMed Central journal article supplement (PMC7488023; doi:10.1186/s10020-020-00203-0), 2020-09-09
Supplement: 10020_2020_203_MOESM2_ESM.pdf [file 10020_2020_203_MOESM2_ESM.pdf]

# Overview of pathways affected after 2 and 0.05 Gray.

\* = p < 0.05

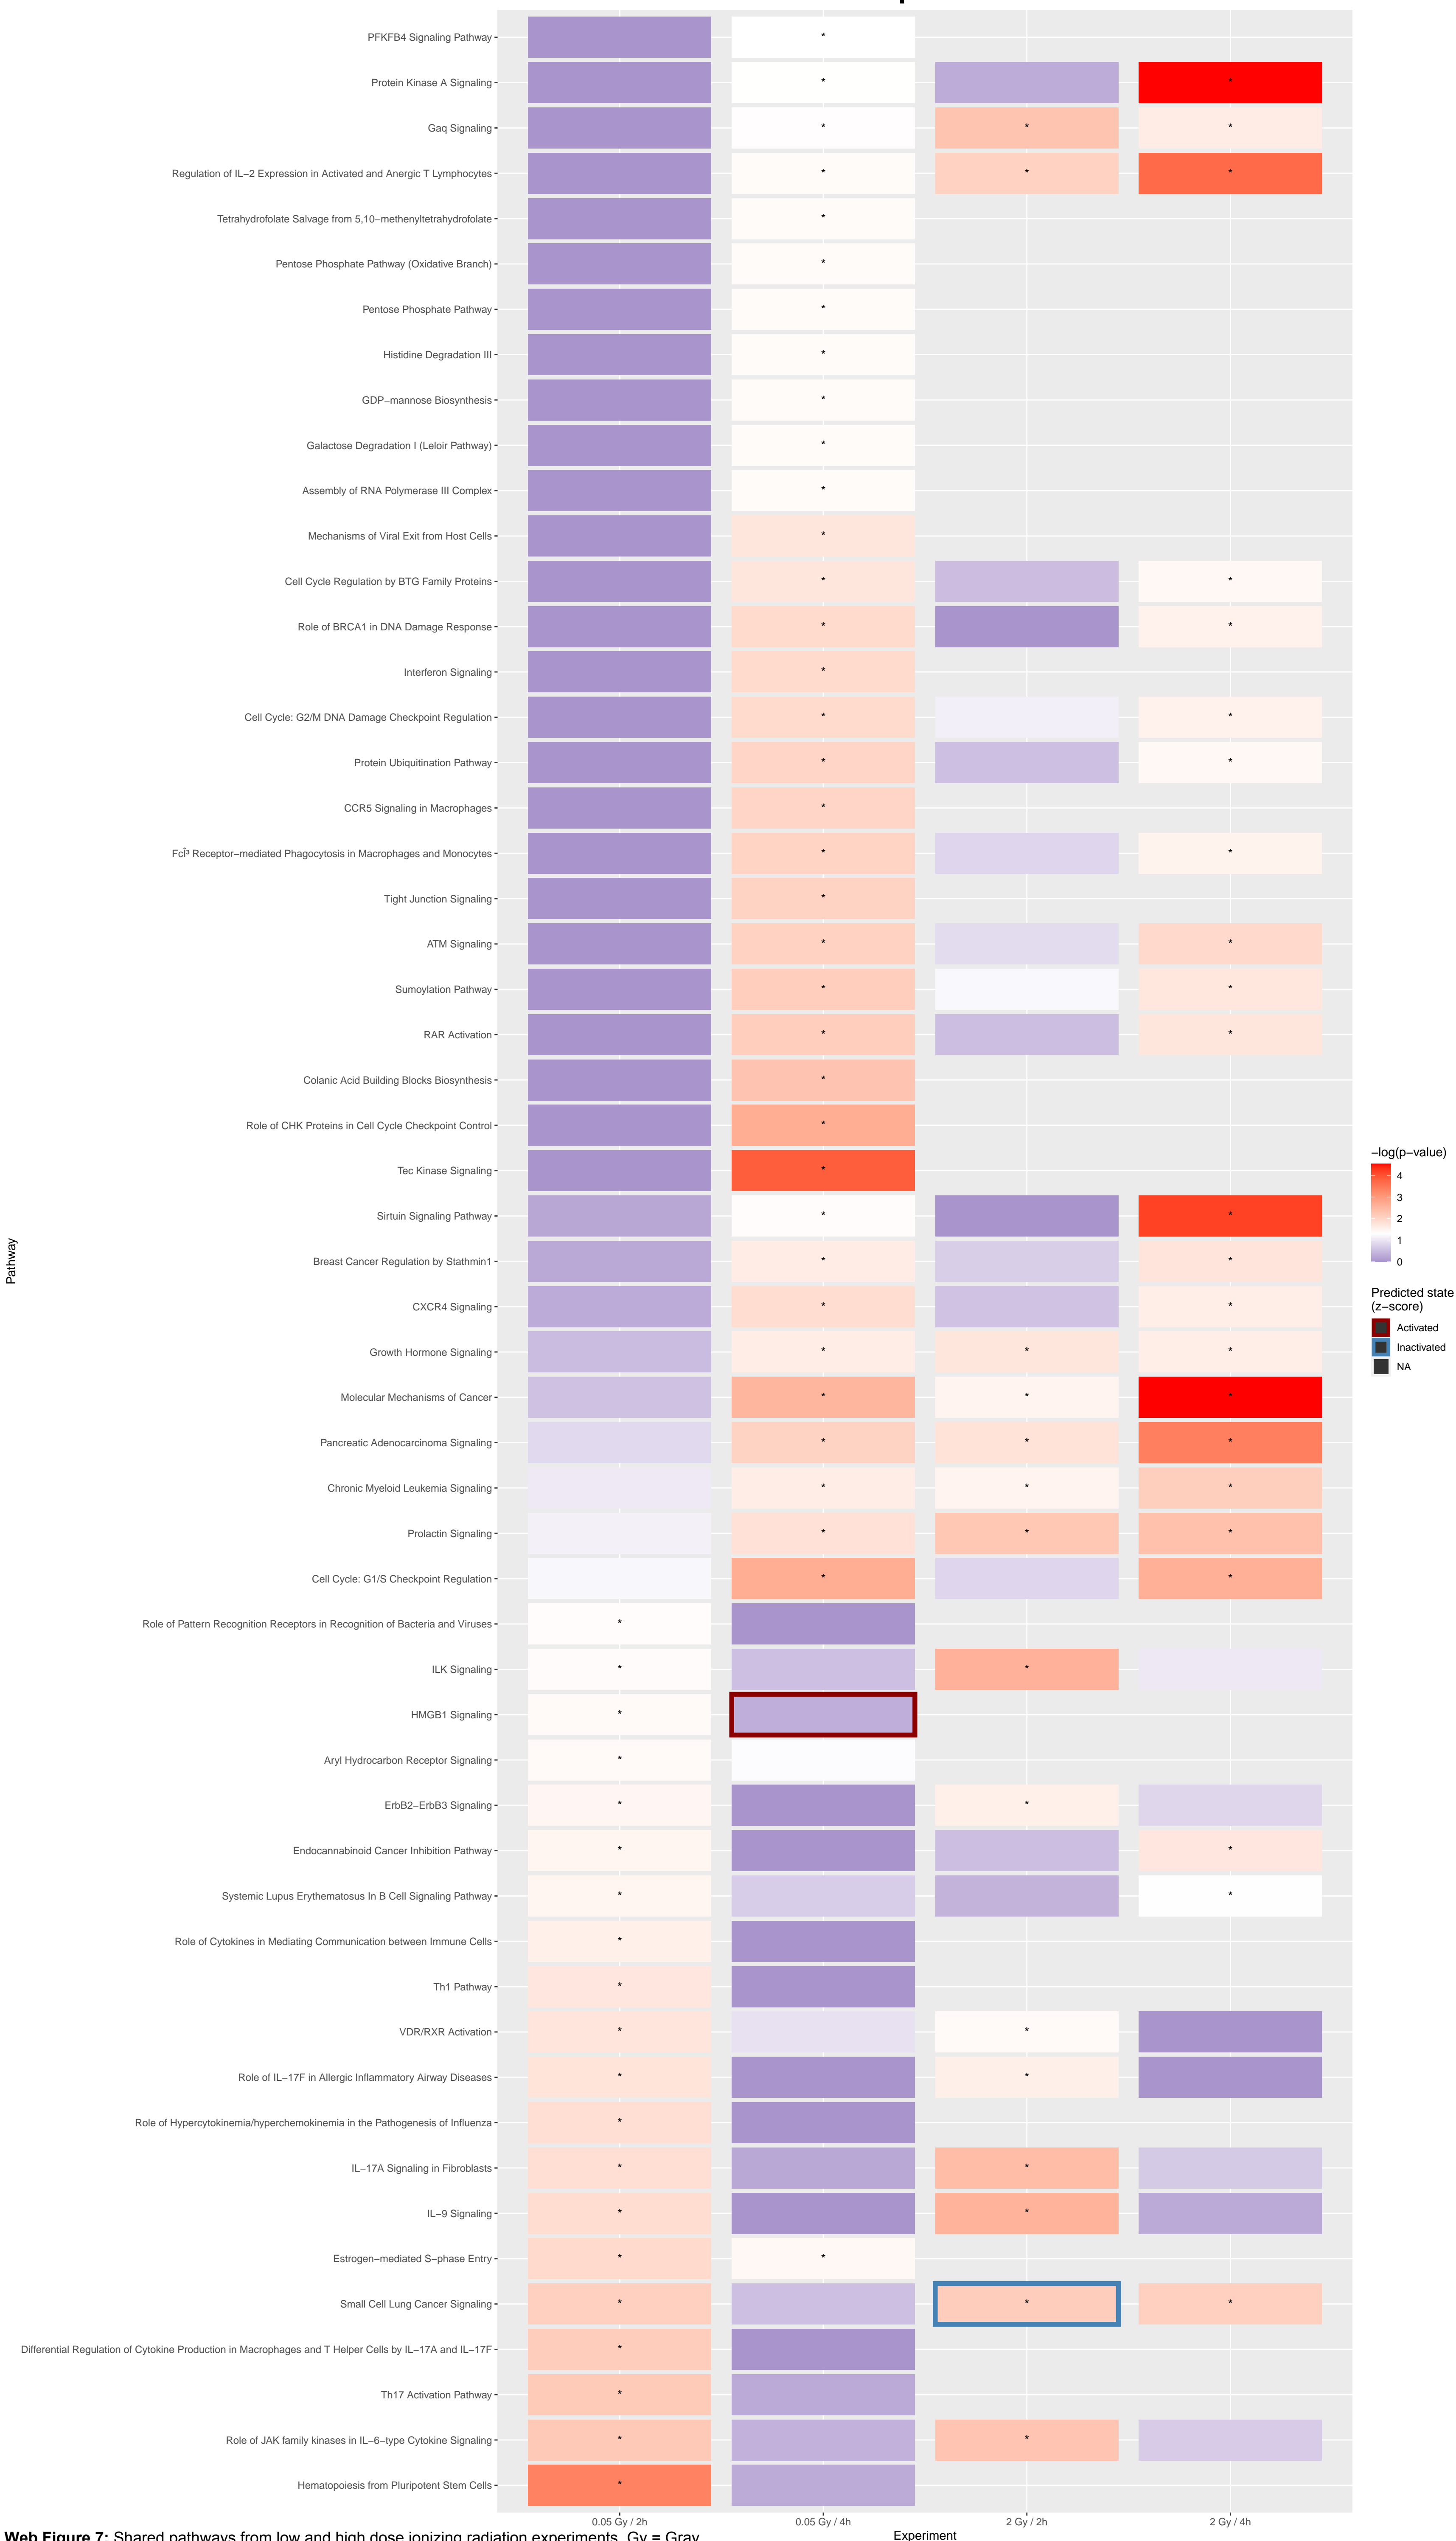

Web Figure 7: Shared pathways from low and high dose ionizing radiation experiments. Gy = Gray.

# Overview of pathways only affected after 2 Gray.

\* = p < 0.05

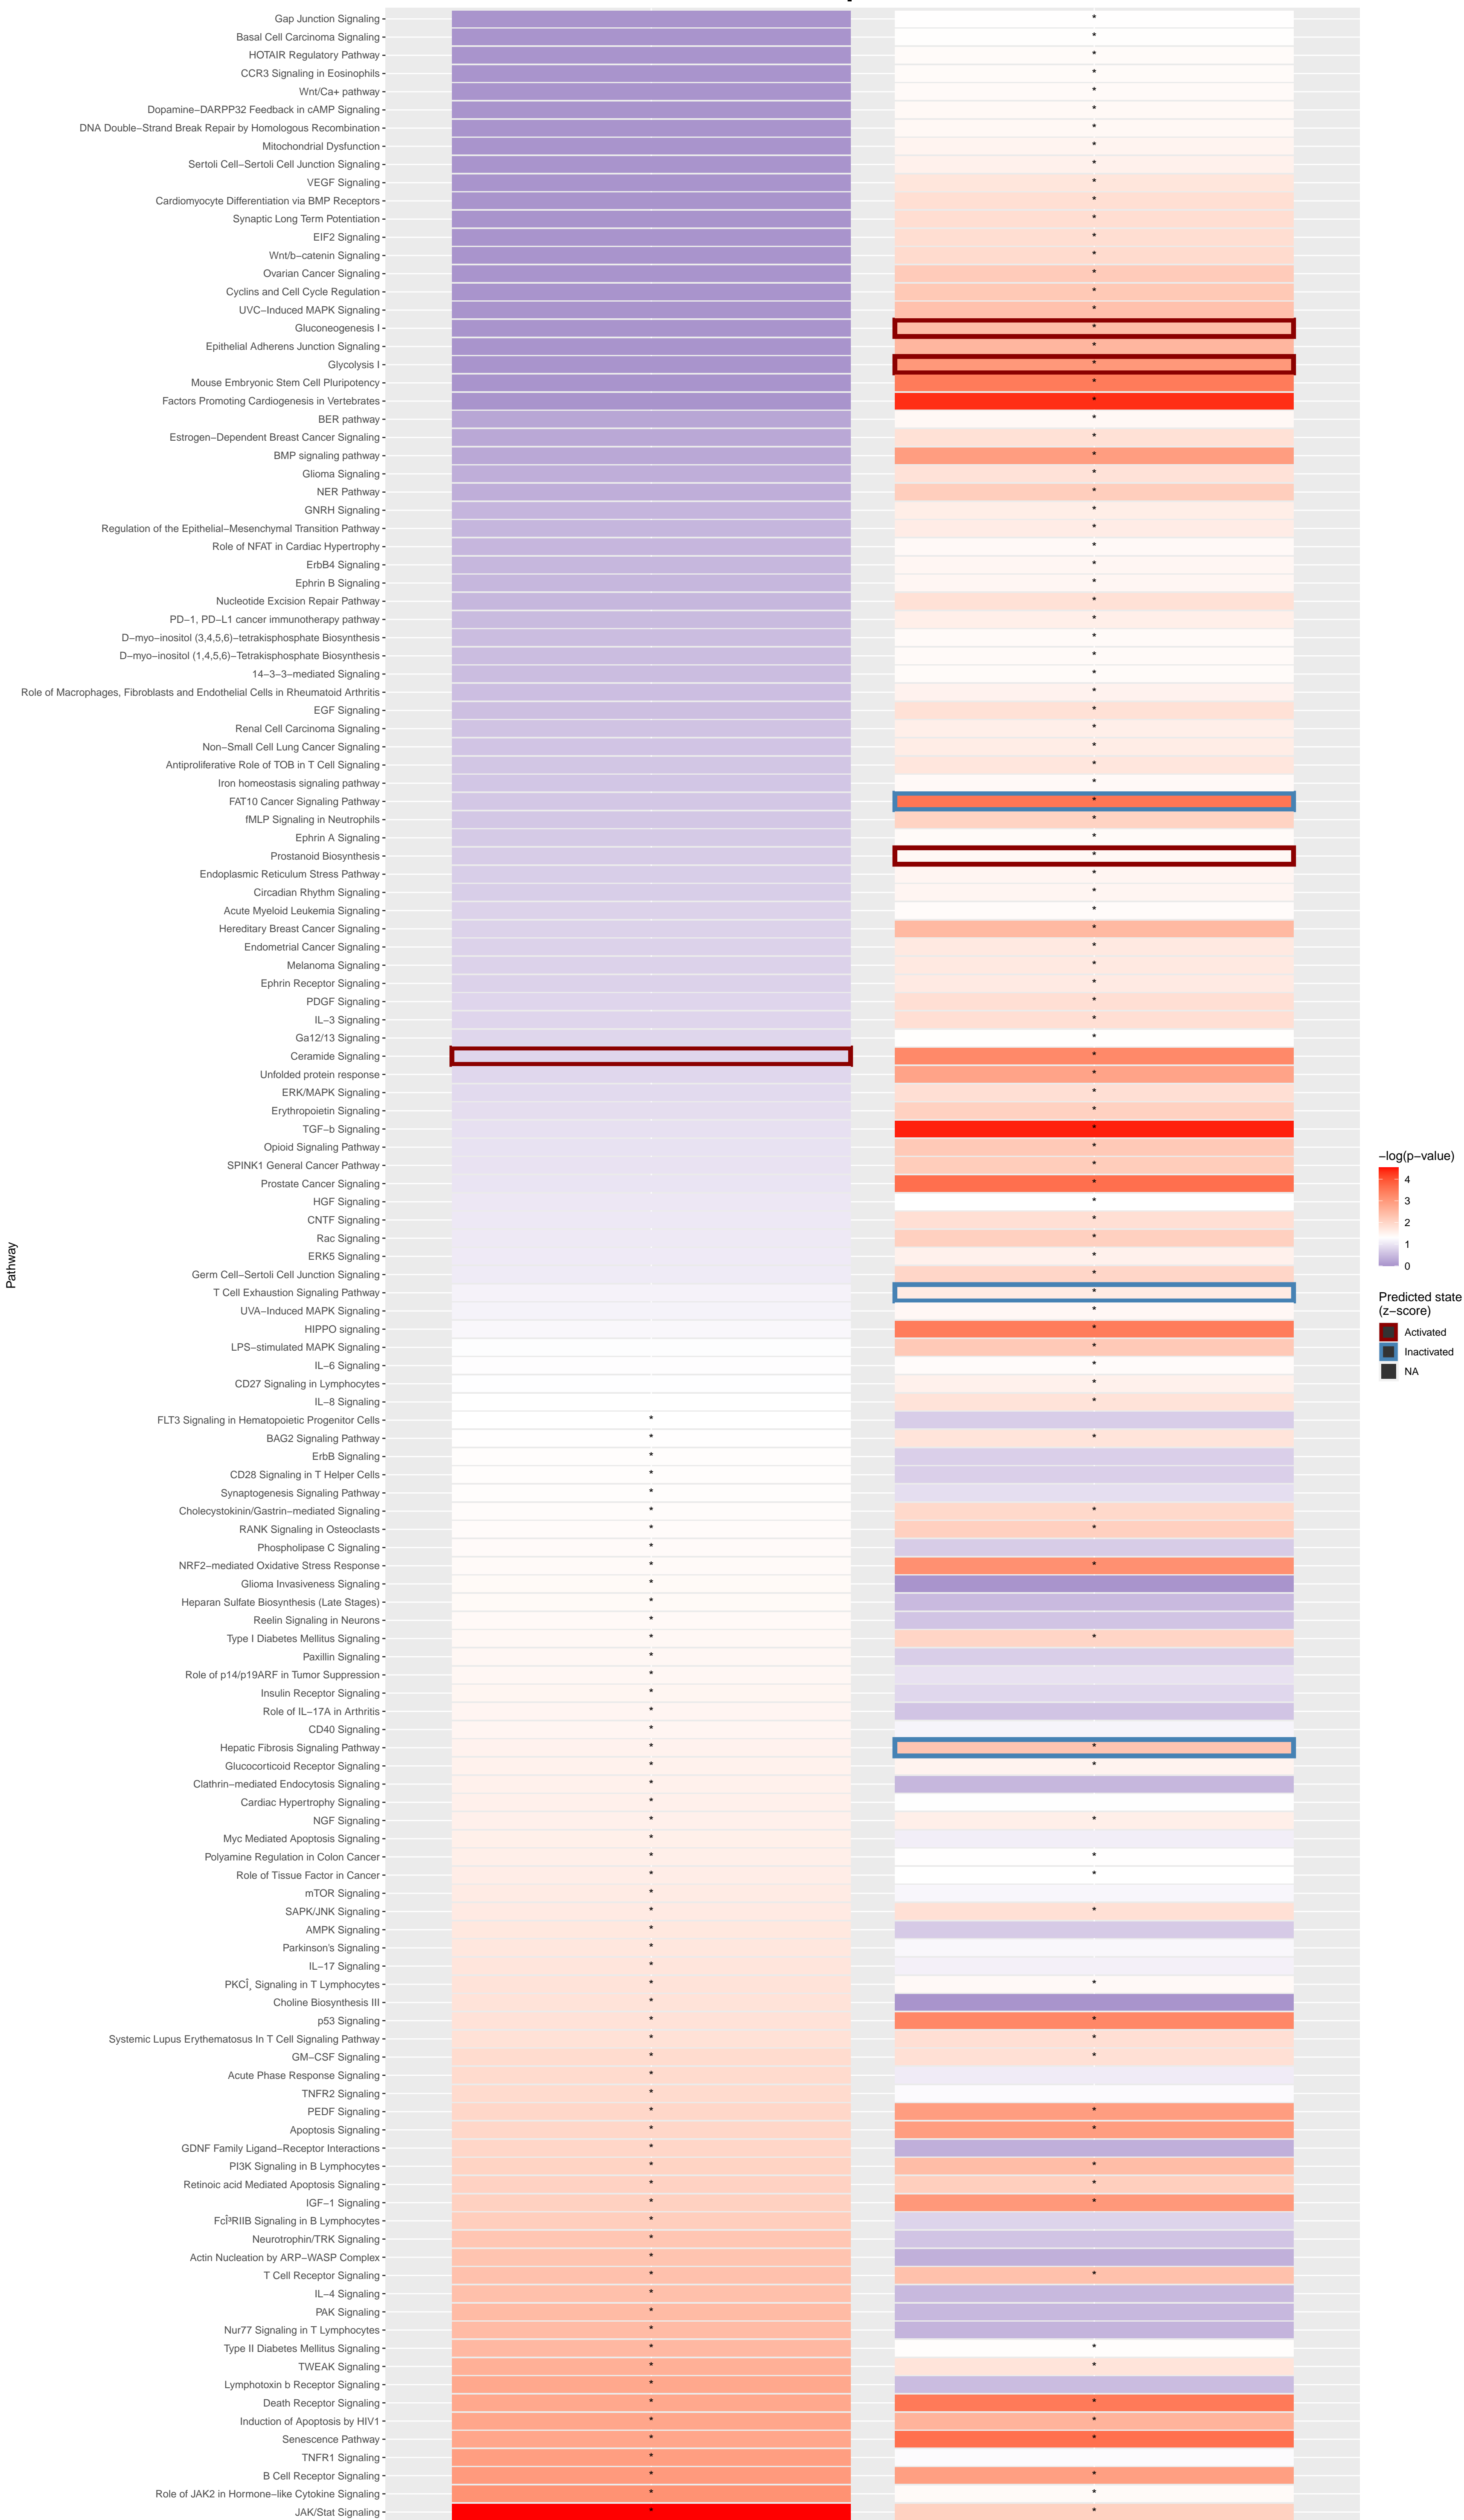

Web Figure 8: Pathways only affected in high dose ionizing radiation experiments. Gy = Gray.

Experiment

2 Gy / 4h
