# Supplementary material for: Comparison of time and dose dependent gene expression and affected pathways in primary human fibroblasts after exposure to ionizing radiation
Source: PubMed Central journal article supplement (PMC7488023; doi:10.1186/s10020-020-00203-0), 2020-09-09

Figure 11: Comparison of affected pathways in different data sets.

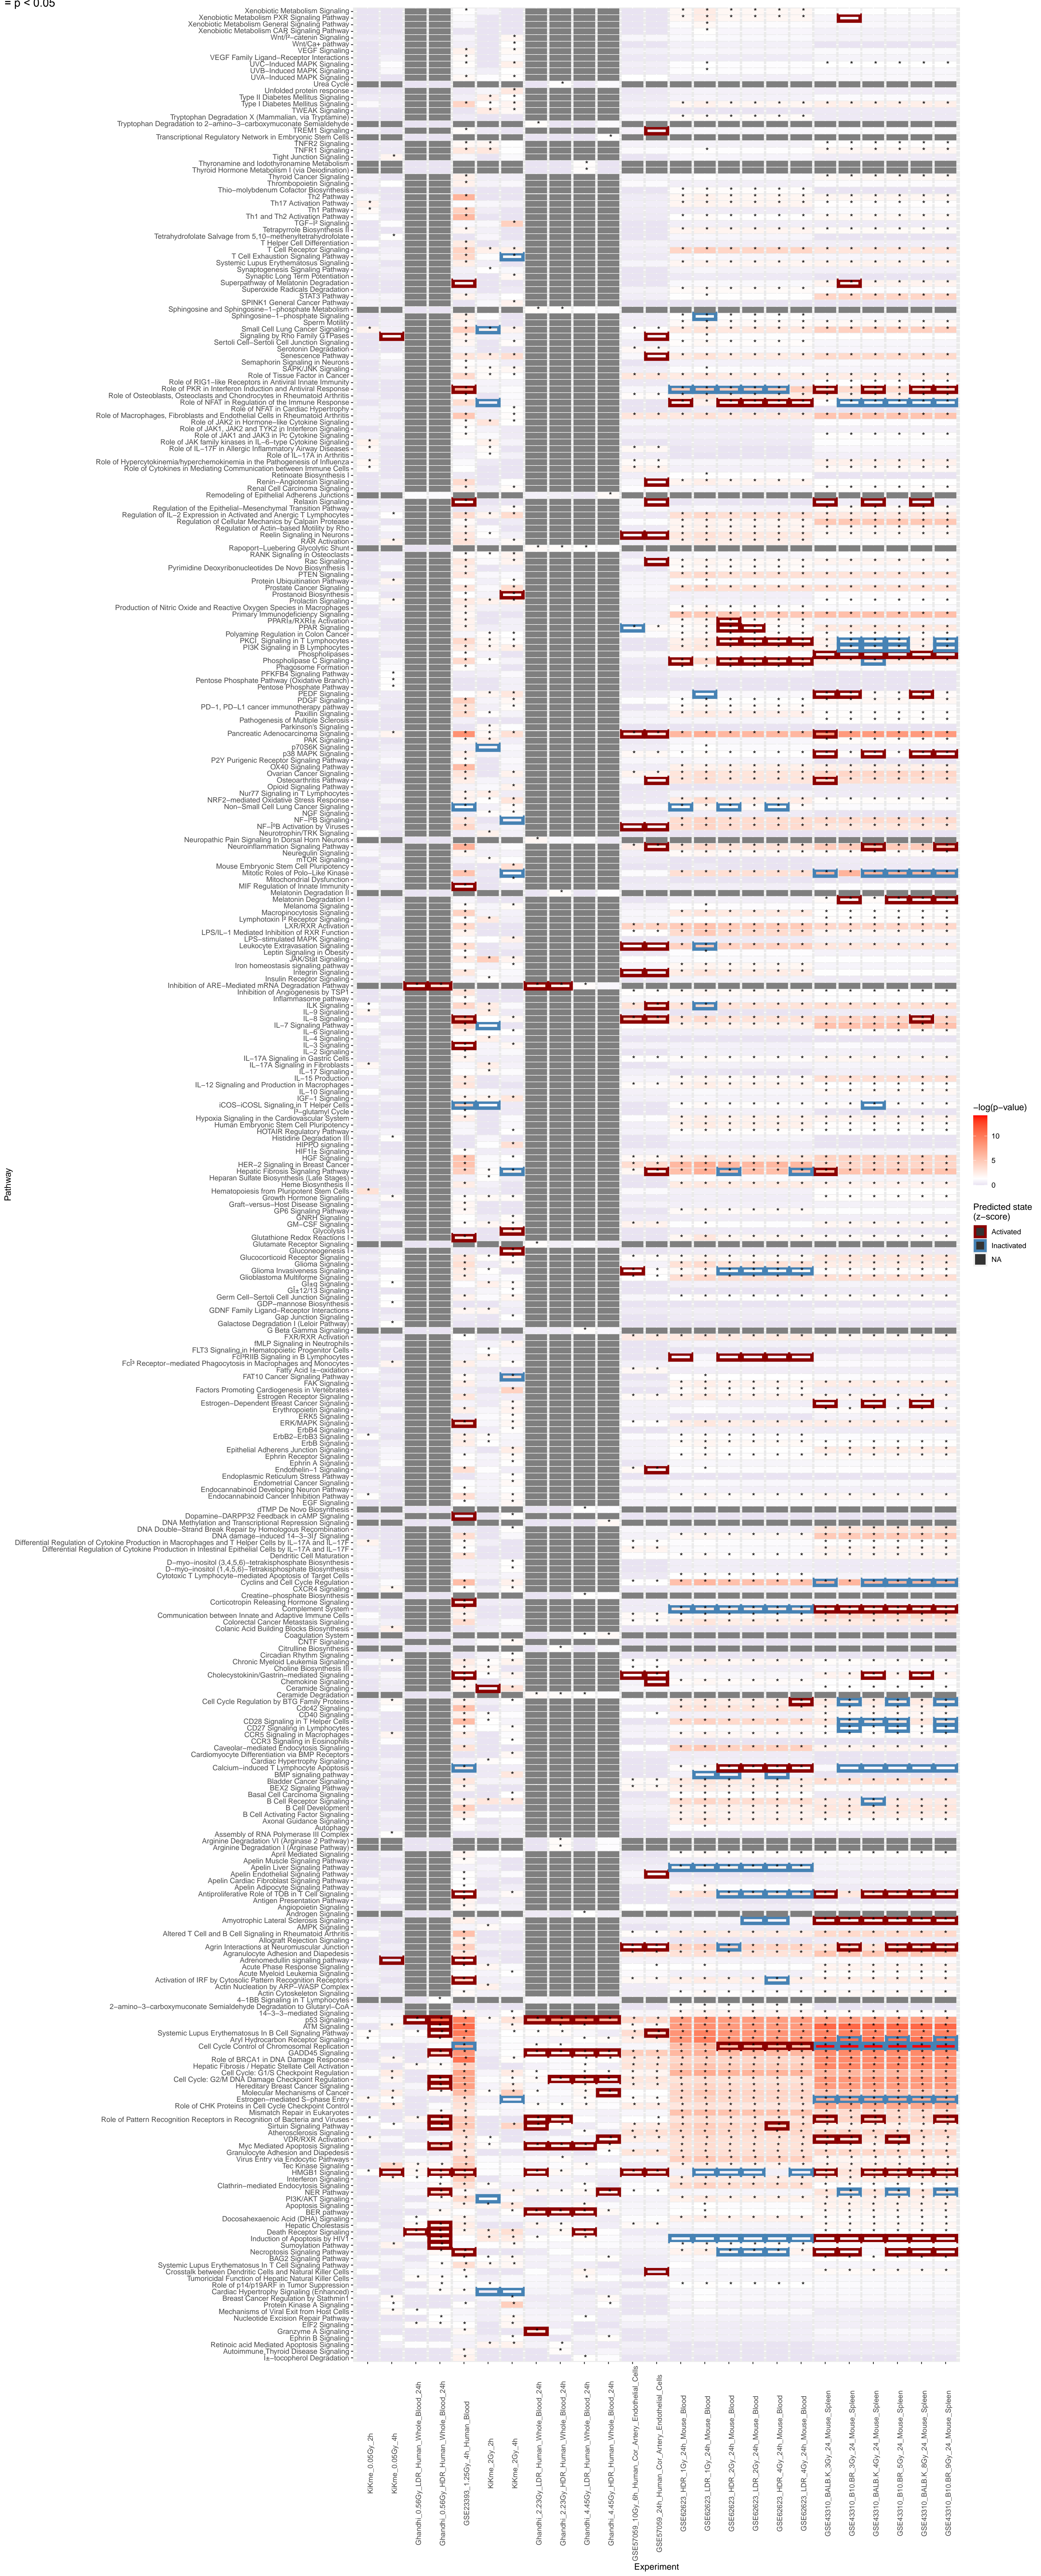

Supplement: 10020_2020_203_MOESM4_ESM.pdf [file 10020_2020_203_MOESM4_ESM.pdf]
