# Supplementary material for: Comparison of time and dose dependent gene expression and affected pathways in primary human fibroblasts after exposure to ionizing radiation
Source: PubMed Central journal article supplement (PMC7488023; doi:10.1186/s10020-020-00203-0), 2020-09-09
Supplement: 10020_2020_203_MOESM8_ESM.pdf [file 10020_2020_203_MOESM8_ESM.pdf]

**Web Table 1A: Differentially expressed genes 2 hours after exposure to low dose ionizing radiation (0.05 Gray).**

| Gene      | Log fold change | Average Expression | t            | P-value  | Adjusted P-value | B           |
|-----------|-----------------|--------------------|--------------|----------|------------------|-------------|
| PPP1R10   | -0.507617105    | 5.684207763        | -7.574473015 | 6.77E-11 | 1.02E-06         | 14.50914081 |
| CITED2    | -0.494064384    | 7.284362326        | -5.838179731 | 1.19E-07 | 0.000299766      | 7.424618124 |
| PLK3      | 0.422295983     | 4.367813593        | 5.866430393  | 1.06E-07 | 0.000299766      | 7.530413694 |
| SLC25A25  | -0.446987779    | 3.769731825        | -5.881151425 | 9.99E-08 | 0.000299766      | 7.588570396 |
| ZNF441    | 0.445566593     | 3.029300148        | 5.887386555  | 9.73E-08 | 0.000299766      | 7.425940119 |
| ZNF792    | 0.714762149     | 0.668462933        | 5.908734083  | 8.90E-08 | 0.000299766      | 6.160192785 |
| ZNF57     | 0.586465343     | 1.250619665        | 5.783416628  | 1.50E-07 | 0.000322456      | 6.612207354 |
| SNAI2     | 0.409298509     | 6.800166099        | 5.721392236  | 1.94E-07 | 0.000364592      | 6.967229472 |
| EGR2      | -0.660292465    | 3.221774446        | -5.54911146  | 3.93E-07 | 0.000578124      | 6.303394221 |
| RNF214    | -0.197523194    | 3.427979864        | -5.573737924 | 3.55E-07 | 0.000578124      | 6.374277009 |
| SIN3B     | -0.192300572    | 5.12749706         | -5.531300694 | 4.22E-07 | 0.000578124      | 6.234235742 |
| BBC3      | 0.449804196     | 4.023738717        | 5.439860668  | 6.12E-07 | 0.000658571      | 5.865071961 |
| PTGS2     | -0.96888866     | 2.583827388        | -5.454843676 | 5.76E-07 | 0.000658571      | 5.916743691 |
| ZNF93     | -0.485833678    | 1.484655632        | -5.450647367 | 5.86E-07 | 0.000658571      | 5.697066696 |
| HYLS1     | 0.344071757     | 2.854120555        | 5.375998189  | 7.92E-07 | 0.000745862      | 5.570969833 |
| TMCC1     | -0.172218576    | 4.187774405        | -5.38214177  | 7.73E-07 | 0.000745862      | 5.66697741  |
| ITPKC     | 0.301254668     | 4.639786348        | 5.338102815  | 9.23E-07 | 0.000817657      | 5.502336477 |
| MAST3     | -0.375744081    | 2.696501265        | -5.185866831 | 1.70E-06 | 0.001403462      | 4.846735269 |
| SPRY2     | -0.453926634    | 4.381484668        | -5.174993483 | 1.77E-06 | 0.001403462      | 4.883402608 |
| HOXA9     | 0.446444943     | 2.911502299        | 5.138387954  | 2.05E-06 | 0.00154141       | 4.699477721 |
| CSRN1     | -0.55130458     | 3.571844999        | -5.086400257 | 2.51E-06 | 0.001802461      | 4.554302004 |
| PYGO2     | -0.173313805    | 4.882586005        | -5.074348078 | 2.63E-06 | 0.001804143      | 4.5185434   |
| TRIB1     | -0.368931218    | 3.62736882         | -5.045984801 | 2.95E-06 | 0.00192922       | 4.415025117 |
| HILPDA    | 0.39007184      | 2.29563701         | 5.010800887  | 3.38E-06 | 0.002122228      | 4.15277638  |
| BICRA     | -0.287802786    | 3.558719552        | -4.959436434 | 4.13E-06 | 0.002347401      | 4.106894219 |
| CDKN1B    | 0.250169426     | 4.570327322        | 4.954799644  | 4.21E-06 | 0.002347401      | 4.088461923 |
| CEP164    | -0.199602282    | 4.464904601        | -4.95783559  | 4.16E-06 | 0.002347401      | 4.094045672 |
| SMYD4     | -0.257243314    | 2.515640738        | -4.93877756  | 4.48E-06 | 0.002409183      | 3.991364015 |
| TSC22D2   | -0.398083096    | 4.592108337        | -4.922807713 | 4.76E-06 | 0.002475023      | 3.959157165 |
| MYC       | -0.590352181    | 4.969945963        | -4.904206936 | 5.12E-06 | 0.002490574      | 3.878852704 |
| PCF11     | -0.323159636    | 4.194386172        | -4.904002133 | 5.13E-06 | 0.002490574      | 3.905658167 |
| MAU2      | -0.186128246    | 4.89619244         | -4.845420463 | 6.43E-06 | 0.002995408      | 3.67986403  |
| ZNF404    | -0.420122785    | 1.283114933        | -4.837933927 | 6.62E-06 | 0.002995408      | 3.588704242 |
| ZNF555    | 0.333746337     | 2.23977075         | 4.832312784  | 6.76E-06 | 0.002995408      | 3.545892035 |
| EPC1      | -0.249835117    | 4.143940781        | -4.785221556 | 8.10E-06 | 0.003486784      | 3.477304867 |
| IRF2BP2   | 0.203581207     | 6.155245929        | 4.730427028  | 9.99E-06 | 0.004179683      | 3.251646297 |
| ATXN2L    | -0.215050097    | 6.643587415        | -4.701996357 | 1.11E-05 | 0.004412224      | 3.146921654 |
| C19orf44  | -0.316414284    | 1.993211342        | -4.702807697 | 1.11E-05 | 0.004412224      | 3.112470271 |
| KIF3A     | -0.29064727     | 2.517266485        | -4.666386097 | 1.27E-05 | 0.004907707      | 3.057970472 |
| RNF19B    | 0.268085858     | 3.164707185        | 4.649141418  | 1.36E-05 | 0.004907707      | 2.997604603 |
| USP27X    | 0.308967414     | 2.537054077        | 4.647507925  | 1.37E-05 | 0.004907707      | 2.986725518 |
| ZNF230    | 0.420211903     | 1.889952638        | 4.655085189  | 1.33E-05 | 0.004907707      | 2.863913576 |
| EMSY      | -0.392017503    | 3.812486004        | -4.637977585 | 1.42E-05 | 0.004947382      | 2.971515792 |
| KLF6      | -0.391505594    | 6.23785017         | -4.627100197 | 1.48E-05 | 0.004947382      | 2.881104916 |
| RSRC2     | 0.344768567     | 5.112437589        | 4.63054041   | 1.46E-05 | 0.004947382      | 2.921374232 |
| LINC00921 | -0.751309583    | -1.34946933        | -4.610114169 | 1.58E-05 | 0.005149751      | 1.459873656 |
| REPIN1    | -0.146741739    | 5.134372614        | -4.604912889 | 1.61E-05 | 0.005149751      | 2.817810681 |
| IL6       | -0.798699595    | 1.982741516        | -4.587983153 | 1.71E-05 | 0.005272998      | 2.80095433  |
| MADD      | -0.238136417    | 4.961093935        | -4.587534299 | 1.72E-05 | 0.005272998      | 2.768273052 |
| TXNDC9    | 0.167263939     | 4.550973891        | 4.576673118  | 1.79E-05 | 0.005382539      | 2.737309933 |
| MTCL1     | -0.245445568    | 6.909153688        | -4.557474377 | 1.92E-05 | 0.005456622      | 2.635852723 |
| ZNF281    | -0.31538113     | 5.148538314        | -4.557850802 | 1.92E-05 | 0.005456622      | 2.643888659 |
| ZNF34     | 0.337420577     | 1.528761665        | 4.565357818  | 1.86E-05 | 0.005456622      | 2.518327964 |
| NOCT      | -0.521458746    | 1.541791622        | -4.53811415  | 2.06E-05 | 0.00575765       | 2.607378471 |
| ANAPC5    | 0.109296495     | 6.452380026        | 4.499848769  | 2.38E-05 | 0.006519567      | 2.434446437 |
| BCL3      | 0.392794935     | 5.381712417        | 4.480175127  | 2.56E-05 | 0.006888703      | 2.378473963 |
| DEDD2     | 0.300887568     | 4.046853599        | 4.456729902  | 2.79E-05 | 0.007382241      | 2.352133805 |
| IL12A     | -0.733063583    | -1.299688675       | -4.450844601 | 2.85E-05 | 0.007414678      | 1.319870178 |
| GRK2      | -0.130864734    | 5.242496109        | -4.393254869 | 3.53E-05 | 0.009013066      | 2.083762572 |
| CYTH1     | -0.238865371    | 3.982642941        | -4.357368727 | 4.03E-05 | 0.010109168      | 2.001111004 |
| CDK7      | 0.222880236     | 4.160941339        | 4.328319601  | 4.48E-05 | 0.011056393      | 1.890570396 |
| ZNF786    | 0.387760245     | 1.961840646        | 4.320122452  | 4.61E-05 | 0.011207906      | 1.823010318 |
| NFRKB     | -0.229122011    | 3.892256458        | -4.307218376 | 4.83E-05 | 0.011560364      | 1.832921753 |
| FST       | 0.231338805     | 6.619768423        | 4.271730452  | 5.50E-05 | 0.012943675      | 1.653048785 |
| LRCH1     | -0.216619478    | 4.130630219        | -4.252058703 | 5.90E-05 | 0.013684198      | 1.644431017 |
| RPRD2     | -0.184809604    | 5.607265704        | -4.235100088 | 6.28E-05 | 0.014327218      | 1.542285961 |
| KANSL2    | 0.24809426      | 3.845354325        | 4.199550993  | 7.13E-05 | 0.016037984      | 1.485882749 |
| BRSK1     | -0.47156278     | 0.551035531        | -4.194294519 | 7.27E-05 | 0.016102883      | 1.223025015 |
| ZFPM2     | -0.371156955    | 2.845053828        | -4.17823708  | 7.70E-05 | 0.016808995      | 1.437982044 |

| Gene         | Log fold change | Average Expression | t            | P-value     | Adjusted P-value | B            |
|--------------|-----------------|--------------------|--------------|-------------|------------------|--------------|
| RAB40C       | -0.176581132    | 3.991638463        | -4.167254248 | 8.01E-05    | 0.017232465      | 1.376182414  |
| UHRF2        | -0.305566958    | 4.163104614        | -4.14981593  | 8.52E-05    | 0.018080736      | 1.317497618  |
| ABL2         | -0.432535935    | 6.051190918        | -4.143570465 | 8.71E-05    | 0.018230866      | 1.228508303  |
| COIL         | 0.176109094     | 3.932233374        | 4.126959459  | 9.24E-05    | 0.019075908      | 1.235523935  |
| KIAA1614     | -0.198581512    | 3.608454138        | -4.113046863 | 9.71E-05    | 0.019771133      | 1.203746709  |
| HPS4         | -0.152562642    | 4.425754514        | -4.094103636 | 0.000103866 | 0.020175154      | 1.099012672  |
| KCNE4        | -0.389313908    | 2.743789532        | -4.10171893  | 0.000101103 | 0.020175154      | 1.189823712  |
| LOC103344931 | -0.321654308    | 1.718752912        | -4.092477476 | 0.000104465 | 0.020175154      | 1.155609119  |
| PNRC2        | 0.186125639     | 5.262119797        | 4.09332288   | 0.000104153 | 0.020175154      | 1.076254535  |
| MRM3         | 0.203940262     | 2.800009944        | 4.088538486  | 0.000105931 | 0.020199238      | 1.152386557  |
| BORCS6       | 0.304875397     | 2.190199816        | 4.083413379  | 0.000107867 | 0.020311401      | 1.113568555  |
| RCOR3        | -0.17486846     | 4.667935028        | -4.076215822 | 0.000110644 | 0.020577138      | 1.043930012  |
| PLEKHF1      | 0.326147189     | 5.026845982        | 4.066894948  | 0.000114343 | 0.021005702      | 1.002129094  |
| EGR1         | -1.00691369     | 6.810030351        | -4.042674822 | 0.000124519 | 0.022337832      | 0.91440145   |
| MARCH7       | -0.204171067    | 5.848780365        | -4.042579985 | 0.00012456  | 0.022337832      | 0.891730163  |
| MAP3K10      | -0.28972931     | 2.729229699        | -4.030824638 | 0.000129809 | 0.023005248      | 0.967301401  |
| CDAN1        | -0.21330382     | 3.340838434        | -4.021578433 | 0.000134086 | 0.023486938      | 0.930651232  |
| ELL          | 0.222413642     | 4.299972796        | 4.011110174  | 0.000139092 | 0.024083725      | 0.824884916  |
| ARL4D        | 0.287546564     | 3.596746301        | 4.000181216  | 0.00014451  | 0.024604115      | 0.85538145   |
| DCAF5        | -0.104378249    | 5.784441832        | -3.998493034 | 0.000145364 | 0.024604115      | 0.753107972  |
| EVC2         | -0.166273378    | 4.110388829        | -3.992477982 | 0.000148449 | 0.02484707       | 0.799460455  |
| RNF216P1     | 0.17955027      | 3.292139692        | 3.983037436  | 0.000153418 | 0.025396531      | 0.80248366   |
| CTC1         | -0.199430693    | 2.69420865         | -3.968387276 | 0.000161446 | 0.026150711      | 0.765927877  |
| RUSC2        | -0.190202148    | 5.867802485        | -3.968915033 | 0.00016115  | 0.026150711      | 0.653235889  |
| PHF13        | 0.40351287      | 5.251495747        | 3.954469146  | 0.000169444 | 0.026314553      | 0.625137043  |
| RNF44        | -0.192045622    | 3.467183352        | -3.95916733  | 0.000166703 | 0.026314553      | 0.712913061  |
| YTHDC1       | -0.148101285    | 5.058275286        | -3.955663592 | 0.000168743 | 0.026314553      | 0.63053985   |
| ZNF766       | 0.190504908     | 3.520778069        | 3.956685225  | 0.000168146 | 0.026314553      | 0.719495047  |
| HES1         | 0.407884074     | 4.343279933        | 3.951166838  | 0.000171397 | 0.026346229      | 0.625040309  |
| BRPF1        | -0.16709174     | 4.330299577        | -3.947806575 | 0.000173407 | 0.026385849      | 0.630884592  |
| RANBP10      | -0.234257388    | 3.912218445        | -3.937392049 | 0.000179779 | 0.027081875      | 0.618283738  |
| DNTTIP2      | 0.150698288     | 6.084594931        | 3.932214806  | 0.000183029 | 0.027298557      | 0.535767691  |
| AMOTL2       | -0.726463878    | 6.437816275        | -3.923530556 | 0.000188609 | 0.027854918      | 0.527777389  |
| DENND2C      | 0.471567488     | 2.317854819        | 3.90751579   | 0.000199328 | 0.028223686      | 0.592473333  |
| MARK2        | -0.160702695    | 4.210483805        | -3.905853019 | 0.000200474 | 0.028223686      | 0.515906796  |
| POLR1C       | 0.323121971     | 3.869990066        | 3.91214177   | 0.000196173 | 0.028223686      | 0.558573773  |
| SOCS3        | -0.582021809    | 5.479201848        | -3.906592856 | 0.000199963 | 0.028223686      | 0.455112574  |
| SPRY1        | -0.616988242    | 2.503585826        | -3.909320388 | 0.000198091 | 0.028223686      | 0.587662752  |
| RAB3A        | 0.463606154     | 1.450154373        | 3.89212802   | 0.000210175 | 0.028782544      | 0.476492309  |
| ST3GAL6-AS1  | 1.000903977     | -3.917254941       | 3.894617642  | 0.000208383 | 0.028782544      | -1.061430237 |
| ZKSCAN4      | 0.320710015     | 2.107599583        | 3.894571178  | 0.000208416 | 0.028782544      | 0.525876423  |
| TMEM68       | -0.224842509    | 2.976632077        | -3.886890632 | 0.000213995 | 0.029041565      | 0.515870561  |
| ERF          | 0.447729153     | 6.219476716        | 3.860782389  | 0.000234046 | 0.030742842      | 0.310897918  |
| KATNAL1      | -0.23011996     | 4.26854648         | -3.859974937 | 0.000234694 | 0.030742842      | 0.359842249  |
| KCNJ2        | -0.502107407    | 2.402750033        | -3.863802377 | 0.000231638 | 0.030742842      | 0.458878616  |
| NFKBIZ       | -0.774442759    | 1.118680004        | -3.867040248 | 0.000229082 | 0.030742842      | 0.469801968  |
| KLF9         | 0.248060748     | 4.966092688        | 3.85472465   | 0.000238949 | 0.03103038       | 0.313205938  |
| ENO2         | -0.22217787     | 4.8727101056       | -3.847871909 | 0.000244614 | 0.031249472      | 0.292664377  |
| TIGD2        | -0.242602439    | 2.481001479        | -3.84766714  | 0.000244785 | 0.031249472      | 0.399412974  |
| PPP1R15B     | -0.254880895    | 4.861127733        | -3.843799311 | 0.000248041 | 0.031399038      | 0.271877867  |
| ORC2         | -0.193962587    | 3.078329138        | -3.835333529 | 0.000255312 | 0.031998131      | 0.34525682   |
| PIM3         | 0.320194201     | 3.957166409        | 3.833377092  | 0.000257022 | 0.031998131      | 0.292899039  |
| S100A2       | 0.467734428     | 0.100839542        | 3.830775092  | 0.000259312 | 0.032018633      | 0.157488877  |
| ARID3A       | 0.277669375     | 3.536743634        | 3.826205729  | 0.000263381 | 0.032256664      | 0.323797626  |
| TCF7L2       | -0.242075014    | 5.198042049        | -3.823769492 | 0.000265575 | 0.03226311       | 0.205488924  |
| EZH1         | -0.168482567    | 4.500825299        | -3.812745032 | 0.000275725 | 0.032964513      | 0.211642141  |
| OTUD1        | -0.264869111    | 3.192914073        | -3.812772568 | 0.0002757   | 0.032964513      | 0.263615922  |
| SPTB         | -1.228331294    | -4.750620944       | -3.808073708 | 0.000280137 | 0.032968653      | -1.656782404 |
| ZNF451       | -0.214777013    | 4.417657652        | -3.80880346  | 0.000279444 | 0.032968653      | 0.199249366  |
| FBXO42       | -0.165317959    | 4.369333738        | -3.79629371  | 0.000291564 | 0.034047459      | 0.17039475   |
| PIM2         | -0.360736994    | 0.23449648         | -3.79071948  | 0.000297125 | 0.034087669      | 0.033934631  |
| TRIM68       | -0.271196531    | 2.875231273        | -3.792875124 | 0.000294963 | 0.034087669      | 0.240932905  |
| WDPCP        | 0.412509273     | 2.569546029        | 3.789161917  | 0.000298697 | 0.034087669      | 0.231921149  |
| ZNF616       | 0.344351868     | 3.501483294        | 3.785531996  | 0.000302391 | 0.034249784      | 0.208332564  |
| FAM214A      | -0.2780167      | 3.816023579        | -3.777522424 | 0.000310697 | 0.03482223       | 0.122634876  |
| ZSCAN26      | -0.200974569    | 3.204013778        | -3.776219977 | 0.000312069 | 0.03482223       | 0.177203194  |
| DCUN1D3      | -0.259327405    | 4.725073927        | -3.766229594 | 0.000322779 | 0.035270087      | 0.028827308  |
| FAM161B      | -0.180212779    | 2.68457292         | -3.769951782 | 0.000318748 | 0.035270087      | 0.170142964  |
| MOB4         | 0.174462347     | 4.220203624        | 3.765929709  | 0.000323106 | 0.035270087      | 0.073640415  |
| CCDC120      | -0.248090133    | 2.229933113        | -3.757966646 | 0.000331902 | 0.035687636      | 0.143695638  |

| Gene       | Log fold change | Average Expression | t            | P-value     | Adjusted P-value | B            |
|------------|-----------------|--------------------|--------------|-------------|------------------|--------------|
| KCTD21     | 0.266213079     | 3.727474248        | 3.754474823  | 0.000335831 | 0.035687636      | 0.089588233  |
| SYT3       | -0.721774501    | -1.899823605       | -3.753965598 | 0.000336408 | 0.035687636      | -0.624606317 |
| ZNF649     | 0.252099538     | 2.65928391         | 3.758991773  | 0.000330757 | 0.035687636      | 0.141887119  |
| ZNF829     | -0.265182782    | 2.270884654        | -3.750397103 | 0.000340475 | 0.035866547      | 0.120344393  |
| DNAJC16    | -0.251177834    | 3.686301898        | -3.740326711 | 0.000352208 | 0.036141596      | 0.03088946   |
| GOLGA6L17P | 1.177266635     | -4.628614519       | 3.745649048  | 0.00034596  | 0.036141596      | -1.746277436 |
| IER5L      | 0.327308585     | 5.5983292          | 3.734403507  | 0.000359288 | 0.036141596      | -0.085210835 |
| IL11       | 0.620527044     | 0.213437919        | 3.73391295   | 0.00035988  | 0.036141596      | -0.044002186 |
| INPP5E     | -0.202108536    | 3.158091339        | -3.737096093 | 0.000356053 | 0.036141596      | 0.052716686  |
| KIAA0753   | -0.238835918    | 3.141176367        | -3.741935567 | 0.000350308 | 0.036141596      | 0.068116013  |
| UQCRC2     | 0.096342052     | 6.751268197        | 3.736579687  | 0.000356671 | 0.036141596      | -0.082852667 |
| AHRR       | -0.230966363    | 5.529719084        | -3.726102967 | 0.000369438 | 0.036855764      | -0.094667119 |
| DISP1      | -0.287560264    | 2.757101556        | -3.715479659 | 0.000382828 | 0.037459348      | 0.003521334  |
| E2F6       | -0.191845051    | 2.67381161         | -3.71696071  | 0.000380934 | 0.037459348      | -0.012507497 |
| TSC1       | -0.192867906    | 5.003091299        | -3.715385768 | 0.000382949 | 0.037459348      | -0.104656588 |
| AIMP1      | 0.163063442     | 5.445630436        | 3.7095727    | 0.000390472 | 0.037705616      | -0.151022918 |
| LARP7      | 0.135987801     | 4.916535587        | 3.710565336  | 0.000389178 | 0.037705616      | -0.128110403 |
| HPS6       | 0.206798619     | 4.726919039        | 3.702255481  | 0.000400143 | 0.037910416      | -0.133466184 |
| PHF21A     | -0.192361159    | 5.12586995         | -3.702418945 | 0.000399925 | 0.037910416      | -0.164692621 |
| ZFHX2      | -0.476127493    | 0.566619232        | -3.702333575 | 0.000400039 | 0.037910416      | -0.16551128  |
| FBRS       | -0.117368279    | 5.970577001        | -3.697731712 | 0.000406236 | 0.038247081      | -0.200359837 |
| ZNF248     | -0.279494226    | 2.50186373         | -3.683048164 | 0.000426625 | 0.039917297      | -0.077418428 |
| PISD       | 0.187369629     | 4.044412885        | 3.673763305  | 0.000440017 | 0.040916178      | -0.18231351  |
| CRYZL1     | 0.138455307     | 3.901238723        | 3.67181366   | 0.00044288  | 0.040929696      | -0.191097684 |
| N4BP2L1    | -0.253859104    | 2.49685235         | -3.664365829 | 0.000453978 | 0.041699582      | -0.150865665 |
| FAXDC2     | -0.172124575    | 4.699607346        | -3.652445515 | 0.000472294 | 0.042942598      | -0.305649931 |
| ZC3H4      | -0.181122365    | 4.74804751         | -3.651110598 | 0.000474389 | 0.042942598      | -0.299168877 |
| ZNF516     | -0.223506946    | 3.906706921        | -3.650047509 | 0.000476063 | 0.042942598      | -0.263721019 |
| IFFO2      | 0.308221353     | 3.495481602        | 3.640040745  | 0.0004921   | 0.043415139      | -0.24944441  |
| KLF7       | -0.394290716    | 4.8151864          | -3.639707236 | 0.000492643 | 0.043415139      | -0.364048178 |
| PRPF40B    | -0.184311546    | 2.000630495        | -3.637829792 | 0.000495712 | 0.043415139      | -0.208800546 |
| WHRN       | -0.3216441      | 2.534640824        | -3.638583231 | 0.000494478 | 0.043415139      | -0.235750326 |
| ZNF250     | 0.2288873       | 2.723961288        | 3.64303152   | 0.000487254 | 0.043415139      | -0.19938351  |
| ULK1       | -0.167597347    | 5.493694662        | -3.633396209 | 0.000503031 | 0.043801487      | -0.389577966 |
| DGKD       | -0.265018939    | 2.708718347        | -3.605110547 | 0.000552199 | 0.046201402      | -0.320983464 |
| FAM13B     | -0.274013594    | 5.065322747        | -3.611523845 | 0.000540666 | 0.046201402      | -0.438701258 |
| FAM212A    | 0.426894279     | 2.452264684        | 3.605650848  | 0.000551218 | 0.046201402      | -0.299791461 |
| MORC2      | -0.1459457      | 4.966363712        | -3.605867288 | 0.000550826 | 0.046201402      | -0.445956782 |
| RASD1      | 0.600067322     | 3.897393683        | 3.603501694  | 0.000555128 | 0.046201402      | -0.335862022 |
| SHROOM3    | -0.317018208    | 4.119030279        | -3.606590025 | 0.000549518 | 0.046201402      | -0.43836946  |
| TTC33      | -0.287993286    | 2.747521737        | -3.61542136  | 0.00053377  | 0.046201402      | -0.27961544  |
| ZNRD1ASP   | -0.424633236    | 0.092261738        | -3.603702076 | 0.000554763 | 0.046201402      | -0.43933758  |
| TMCC2      | -0.338186618    | 1.883116238        | -3.585876456 | 0.000588204 | 0.048685162      | -0.354550503 |
| ARID5B     | -0.302289535    | 7.10762133         | -3.579957111 | 0.000599725 | 0.048833846      | -0.549959435 |
| CRAMP1     | -0.253283288    | 2.60678758         | -3.581886852 | 0.000595946 | 0.048833846      | -0.372153124 |
| KIAA1107   | -0.510682569    | 1.165641879        | -3.581010065 | 0.00059766  | 0.048833846      | -0.379261116 |
| TOMM20     | 0.087778962     | 7.382595431        | 3.572935423  | 0.00061367  | 0.049700693      | -0.576087711 |
