# Supplementary material for: Comparison of time and dose dependent gene expression and affected pathways in primary human fibroblasts after exposure to ionizing radiation
Source: PubMed Central journal article supplement (PMC7488023; doi:10.1186/s10020-020-00203-0), 2020-09-09
Supplement: 10020_2020_203_MOESM9_ESM.pdf [file 10020_2020_203_MOESM9_ESM.pdf]

**Web Table 1B: Differentially expressed genes 4 hours after exposure to low dose ionizing radiation (0.05 Gray).**

| Gene     | Log fold change | Average Expression | t            | P-value  | Adjusted P-value | B           |
|----------|-----------------|--------------------|--------------|----------|------------------|-------------|
| CDKN1A   | 0.432843772     | 9.578941307        | 8.592280753  | 7.46E-13 | 1.12E-08         | 18.45294046 |
| SESN1    | 0.377724505     | 4.358072382        | 7.255830766  | 2.75E-10 | 2.07E-06         | 12.99102452 |
| PPM1D    | 0.301682881     | 4.428273031        | 6.34317319   | 1.43E-08 | 7.16E-05         | 9.343067703 |
| PIAS3    | 0.214282135     | 5.014677333        | 6.113953025  | 3.76E-08 | 0.000141784      | 8.480558511 |
| PHLDB3   | 0.468393766     | 3.007928833        | 5.855704199  | 1.11E-07 | 0.000334452      | 7.203553078 |
| MBNL2    | -0.398759763    | 4.966848271        | -5.782920262 | 1.50E-07 | 0.000376973      | 7.180888615 |
| MTA3     | 0.152253748     | 4.715769842        | 5.683028064  | 2.27E-07 | 0.000488033      | 6.795100017 |
| EHBP1    | -0.233554344    | 6.601495233        | -5.639609065 | 2.71E-07 | 0.000510451      | 6.647121528 |
| APOL3    | 0.278570802     | 5.091969825        | 5.571441436  | 3.58E-07 | 0.000599841      | 6.379874611 |
| NECAB3   | 0.329384083     | 3.046172099        | 5.525758002  | 4.32E-07 | 0.000650461      | 6.056547187 |
| MDM2     | 0.396213602     | 6.788792003        | 5.45693695   | 5.71E-07 | 0.000658113      | 5.950355355 |
| HR       | 0.367044286     | 3.229848901        | 5.478908066  | 5.22E-07 | 0.000658113      | 5.945279971 |
| SAMD4A   | -0.42097292     | 5.653654879        | -5.449860986 | 5.88E-07 | 0.000658113      | 5.923138281 |
| ARL15    | -0.271105921    | 3.427625651        | -5.440032531 | 6.12E-07 | 0.000658113      | 5.807819727 |
| RANBP9   | -0.199477375    | 6.11643876         | -5.392186656 | 7.42E-07 | 0.000739991      | 5.705537442 |
| PHLDA3   | 0.263949023     | 7.237706873        | 5.377958774  | 7.86E-07 | 0.000739991      | 5.651704401 |
| USP21    | 0.277661312     | 3.607283331        | 5.295827279  | 1.09E-06 | 0.000968829      | 5.306681421 |
| BBC3     | 0.409923678     | 4.023738717        | 5.244402218  | 1.34E-06 | 0.001123891      | 5.118207869 |
| TANK     | -0.193021374    | 4.913049683        | -5.214115268 | 1.52E-06 | 0.00115607       | 5.037026412 |
| TAB1     | 0.24947671      | 4.765249553        | 5.210880631  | 1.53E-06 | 0.00115607       | 5.024255899 |
| ATF1     | -0.173329521    | 4.947189102        | -5.177949065 | 1.75E-06 | 0.001254991      | 4.904965038 |
| ZNF219   | 0.223698433     | 6.050325957        | 5.147079354  | 1.98E-06 | 0.001351495      | 4.791397747 |
| RBMS1    | -0.225366254    | 6.997915219        | -5.136296088 | 2.06E-06 | 0.001351495      | 4.751547288 |
| GPI      | 0.180602348     | 7.898670936        | 5.101007711  | 2.37E-06 | 0.001430846      | 4.622568664 |
| SLC39A7  | 0.123020517     | 7.498341312        | 5.092184745  | 2.46E-06 | 0.001430846      | 4.590235583 |
| BLOC1S2  | 0.188341462     | 5.890622378        | 5.090794277  | 2.47E-06 | 0.001430846      | 4.584645319 |
| PPP1R10  | 0.33782037      | 5.684207763        | 5.04417391   | 2.97E-06 | 0.001645005      | 4.413998405 |
| RAP2C    | -0.197236304    | 4.570085976        | -5.036469747 | 3.06E-06 | 0.001645005      | 4.386402838 |
| SPG20    | -0.129773671    | 7.214586345        | -5.021093377 | 3.25E-06 | 0.001678443      | 4.329647227 |
| ZFPM1    | 0.413893723     | 2.984503149        | 5.013727717  | 3.34E-06 | 0.001678443      | 4.211386557 |
| CDV3     | -0.234343443    | 7.585817109        | -5.004761754 | 3.46E-06 | 0.0016823        | 4.271134381 |
| LAMTOR3  | -0.151904665    | 5.231015097        | -4.94282127  | 4.41E-06 | 0.002075142      | 4.047074648 |
| PROKR1   | -0.288643687    | 2.010559965        | -4.92740422  | 4.68E-06 | 0.002136538      | 3.744415326 |
| RPAP1    | 0.225225201     | 4.342937164        | 4.893858664  | 5.33E-06 | 0.002361833      | 3.872631957 |
| POLRMT   | 0.21603156      | 4.041310195        | 4.880483161  | 5.61E-06 | 0.002416243      | 3.824603067 |
| NAV3     | -0.458940258    | 4.020636292        | -4.86415663  | 5.98E-06 | 0.00250212       | 3.765309911 |
| STAU2    | -0.238971907    | 3.94009305         | -4.852220988 | 6.26E-06 | 0.002513378      | 3.717908225 |
| MVB12B   | 0.228056353     | 3.617885268        | 4.845135795  | 6.43E-06 | 0.002513378      | 3.684970227 |
| FGD1     | 0.217240846     | 5.443223203        | 4.842243663  | 6.51E-06 | 0.002513378      | 3.684474194 |
| SPRED2   | -0.257744255    | 5.967506875        | -4.834551282 | 6.70E-06 | 0.002524246      | 3.655898493 |
| RHOBTB3  | -0.250641713    | 6.8082914          | -4.812147899 | 7.31E-06 | 0.00268432       | 3.575155861 |
| KIAA1614 | 0.227096378     | 3.608454138        | 4.784309893  | 8.13E-06 | 0.002833638      | 3.477027994 |
| SLC20A1  | -0.594276109    | 7.015763557        | -4.779630024 | 8.28E-06 | 0.002833638      | 3.460103963 |
| PRIMPOL  | -0.307748877    | 2.844398578        | -4.785112874 | 8.10E-06 | 0.002833638      | 3.405528991 |
| TGFB1    | 0.251149066     | 7.251656543        | 4.762665242  | 8.83E-06 | 0.002953226      | 3.400407545 |
| GSE1     | -0.240273799    | 5.83869265         | -4.757207817 | 9.02E-06 | 0.002953226      | 3.379318774 |
| GAS2L3   | -0.482732583    | 3.350529159        | -4.734137156 | 9.85E-06 | 0.003050554      | 3.30499913  |
| SH2B3    | -0.333073157    | 5.366836049        | -4.73226628  | 9.92E-06 | 0.003050554      | 3.292957044 |
| HSPA1L   | 0.510793415     | 1.072949412        | 4.732161259  | 9.92E-06 | 0.003050554      | 2.866127914 |
| FBXO22   | 0.204152226     | 4.733788456        | 4.723438931  | 1.03E-05 | 0.003090577      | 3.269057059 |
| SLC10A3  | 0.154741153     | 5.656145013        | 4.714502496  | 1.06E-05 | 0.003134839      | 3.229170925 |
| TLCD1    | 0.26093056      | 2.17816021         | 4.694606101  | 1.14E-05 | 0.00331613       | 3.10009792  |
| GTF2IRD1 | 0.190342221     | 4.135950413        | 4.688163238  | 1.17E-05 | 0.003334126      | 3.146966108 |
| DCP1B    | 0.195069849     | 4.061718856        | 4.658954065  | 1.31E-05 | 0.003655409      | 3.045330726 |
| KLHL42   | -0.274081234    | 4.488815774        | -4.653183994 | 1.34E-05 | 0.003666277      | 3.023769393 |
| FERMT2   | -0.297009111    | 7.023179374        | -4.643868582 | 1.39E-05 | 0.003666277      | 2.980621042 |
| WDR91    | 0.269425922     | 2.691396339        | 4.645119566  | 1.38E-05 | 0.003666277      | 2.954435079 |
| VAV2     | 0.212410737     | 4.729795476        | 4.636235537  | 1.43E-05 | 0.003708436      | 2.962686081 |
| SUOX     | 0.19823093      | 3.940767992        | 4.617207304  | 1.53E-05 | 0.003885726      | 2.899681102 |
| TBL3     | 0.198013289     | 5.362563944        | 4.614859275  | 1.55E-05 | 0.003885726      | 2.881689228 |
| SCAF1    | 0.18292039      | 6.637841298        | 4.569450978  | 1.84E-05 | 0.004533021      | 2.719083838 |
| APEX2    | 0.187294199     | 4.288411392        | 4.563042731  | 1.88E-05 | 0.004544623      | 2.712701834 |
| DUS2     | 0.227241061     | 2.788009318        | 4.555949904  | 1.93E-05 | 0.004544623      | 2.673191005 |
| KY       | 0.625703535     | 0.221966586        | 4.556429267  | 1.93E-05 | 0.004544623      | 2.086469717 |
| PLEKHA4  | 0.221880652     | 6.905160502        | 4.550653412  | 1.97E-05 | 0.004564263      | 2.655058609 |
| PNRC1    | 0.237279033     | 6.351458449        | 4.544756387  | 2.01E-05 | 0.004595325      | 2.633089607 |
| MIER1    | -0.163246347    | 5.456200614        | -4.505720552 | 2.33E-05 | 0.00523623       | 2.504054173 |
| PRKD2    | 0.182248786     | 4.668302801        | 4.493129136  | 2.44E-05 | 0.005395704      | 2.466706715 |
| PPME1    | 0.160522641     | 5.100861017        | 4.48974237   | 2.47E-05 | 0.005395704      | 2.451101111 |

| Gene     | Log fold change | Average Expression | t            | P-value     | Adjusted P-value | B            |
|----------|-----------------|--------------------|--------------|-------------|------------------|--------------|
| FLJ20021 | 0.415509322     | 1.914310567        | 4.46795276   | 2.68E-05    | 0.005766512      | 2.253405213  |
| MOSPD2   | -0.293415846    | 4.18114598         | -4.460261701 | 2.76E-05    | 0.005849603      | 2.360822985  |
| BNIP2    | -0.217572632    | 5.977886095        | -4.438856234 | 2.98E-05    | 0.006243563      | 2.26972567   |
| USP11    | 0.171944755     | 6.414960399        | 4.429052446  | 3.09E-05    | 0.006303373      | 2.235072302  |
| METAP1D  | -0.247460614    | 2.506577814        | -4.428851704 | 3.10E-05    | 0.006303373      | 2.209471564  |
| APOL2    | 0.229024129     | 5.502636902        | 4.424234739  | 3.15E-05    | 0.006326148      | 2.220888576  |
| ZBTB44   | -0.159038893    | 5.6187454          | -4.419621019 | 3.20E-05    | 0.006350001      | 2.206983306  |
| C19orf68 | 0.290011466     | 3.024283823        | 4.414911471  | 3.26E-05    | 0.00637724       | 2.209072517  |
| RIMKLB   | -0.276387951    | 3.552132045        | -4.404601631 | 3.39E-05    | 0.006482193      | 2.180512003  |
| ZBTB45   | 0.18881402      | 4.443433278        | 4.40009095   | 3.44E-05    | 0.006482193      | 2.158011503  |
| TNS2     | 0.212933447     | 7.209638618        | 4.402519332  | 3.41E-05    | 0.006482193      | 2.147678709  |
| ING5     | -0.251956584    | 2.91927999         | -4.377633694 | 3.74E-05    | 0.006933881      | 2.083840546  |
| UMAD1    | -0.196433402    | 3.73117527         | -4.375020211 | 3.77E-05    | 0.006933881      | 2.081821691  |
| MED25    | 0.198099537     | 4.946566717        | 4.367101999  | 3.89E-05    | 0.00705203       | 2.039368243  |
| NXPH4    | 0.323861596     | 2.88423744         | 4.359898955  | 3.99E-05    | 0.00707012       | 2.018192656  |
| GPSM1    | 0.182599877     | 5.830682005        | 4.36154952   | 3.97E-05    | 0.00707012       | 2.007746778  |
| ARHGAP18 | -0.277617509    | 4.711536226        | -4.352585753 | 4.10E-05    | 0.007175494      | 1.993127841  |
| TAP1     | 0.189040143     | 5.266718745        | 4.346667758  | 4.19E-05    | 0.007175494      | 1.965100257  |
| TAOK3    | -0.179878274    | 5.237977076        | -4.346368021 | 4.19E-05    | 0.007175494      | 1.96185892   |
| SPRED1   | -0.305921377    | 6.028243405        | -4.337733088 | 4.33E-05    | 0.007322166      | 1.927144512  |
| THEM6    | 0.227271919     | 3.370717777        | 4.321165819  | 4.60E-05    | 0.007691714      | 1.903006895  |
| FGF5     | -0.401790561    | 5.634833103        | -4.31136771  | 4.76E-05    | 0.007766408      | 1.846045929  |
| STAT5A   | 0.16190553      | 4.999452527        | 4.309494419  | 4.79E-05    | 0.007766408      | 1.842810965  |
| HTR7P1   | -0.243126947    | 2.700114598        | -4.305919364 | 4.86E-05    | 0.007766408      | 1.829640317  |
| OSBPL5   | 0.182099203     | 5.922964281        | 4.303651693  | 4.90E-05    | 0.007766408      | 1.812302154  |
| HTR7     | -1.161475245    | -2.64235738        | -4.306025605 | 4.86E-05    | 0.007766408      | -0.517642063 |
| DAB2     | -0.224973146    | 9.017649532        | -4.298920321 | 4.98E-05    | 0.007818791      | 1.822110857  |
| ANKZF1   | 0.266377013     | 3.044247036        | 4.295934172  | 5.04E-05    | 0.007822572      | 1.820250796  |
| SLC29A3  | 0.220067276     | 3.722881265        | 4.279187608  | 5.35E-05    | 0.008180528      | 1.765213532  |
| PRELID3B | -0.16606138     | 5.026968209        | -4.277973709 | 5.38E-05    | 0.008180528      | 1.737758052  |
| MRPL2    | 0.240149281     | 4.176568333        | 4.270783206  | 5.52E-05    | 0.008224653      | 1.729513653  |
| VIPAS39  | 0.235344668     | 4.662199395        | 4.263221957  | 5.67E-05    | 0.008224653      | 1.694617107  |
| CARM1    | 0.123813747     | 6.667150074        | 4.265850294  | 5.62E-05    | 0.008224653      | 1.684462949  |
| RAP2B    | 0.177746068     | 6.391043181        | 4.262877427  | 5.68E-05    | 0.008224653      | 1.67458384   |
| TOX      | -0.5339685      | 1.658053922        | -4.265392956 | 5.63E-05    | 0.008224653      | 1.577679909  |
| TCP1     | 0.125280262     | 7.349444151        | 4.255593523  | 5.83E-05    | 0.00836368       | 1.65588431   |
| PUSL1    | 0.255157877     | 3.472066732        | 4.246444852  | 6.03E-05    | 0.008511107      | 1.658610832  |
| SLC35A5  | -0.185005419    | 5.087413857        | -4.244394296 | 6.07E-05    | 0.008511107      | 1.624816289  |
| PTPN12   | -0.160259002    | 5.891333803        | -4.242951717 | 6.10E-05    | 0.008511107      | 1.610958026  |
| TRIQQ    | -0.187076743    | 4.673065596        | -4.234910091 | 6.28E-05    | 0.008605279      | 1.605034483  |
| UBL3     | -0.162176774    | 6.968783265        | -4.234811422 | 6.28E-05    | 0.008605279      | 1.583337897  |
| VDR      | -0.308811039    | 5.957651041        | -4.227297077 | 6.46E-05    | 0.008761746      | 1.558921983  |
| REEP4    | 0.255655772     | 3.368425212        | 4.217538006  | 6.69E-05    | 0.00891428       | 1.564458034  |
| ETFBKMT  | 0.370359071     | 0.872196008        | 4.218140605  | 6.67E-05    | 0.00891428       | 1.298724462  |
| LRP3     | 0.170675793     | 7.069257127        | 4.213577045  | 6.78E-05    | 0.008962817      | 1.512851173  |
| RPS6KA4  | 0.157120338     | 6.213833542        | 4.201077537  | 7.09E-05    | 0.009292827      | 1.468693351  |
| CGGBP1   | -0.188226215    | 6.292001153        | -4.188932796 | 7.41E-05    | 0.00960414       | 1.428687129  |
| YIPF4    | -0.152052798    | 5.556530055        | -4.187078205 | 7.46E-05    | 0.00960414       | 1.428497428  |
| DNM2     | 0.114014574     | 6.598203373        | 4.180873507  | 7.63E-05    | 0.009736688      | 1.401960707  |
| ZNF367   | -0.487469074    | 2.277310962        | -4.177311982 | 7.72E-05    | 0.009778705      | 1.413898621  |
| SRSF6    | -0.212855494    | 6.611087388        | -4.167739147 | 7.99E-05    | 0.01003487       | 1.3596519    |
| SEMA6C   | 0.265983109     | 3.207102384        | 4.159632822  | 8.23E-05    | 0.010234908      | 1.378371565  |
| TRAK1    | -0.182069117    | 6.431975182        | -4.157582674 | 8.29E-05    | 0.010234908      | 1.325057354  |
| NAPG     | -0.19648043     | 3.779086621        | -4.149683206 | 8.53E-05    | 0.010274718      | 1.343137284  |
| REST     | -0.341895234    | 4.514536397        | -4.153179107 | 8.42E-05    | 0.010274718      | 1.334677276  |
| UBE2I    | 0.128183763     | 6.740166105        | 4.150543124  | 8.50E-05    | 0.010274718      | 1.302963933  |
| MIR22HG  | -0.309119854    | 4.512902585        | -4.144448591 | 8.69E-05    | 0.010385102      | 1.31326148   |
| CLDND1   | -0.137961016    | 4.360996225        | -4.137821784 | 8.89E-05    | 0.010543906      | 1.295129772  |
| RFX1     | 0.21109009      | 3.721508768        | 4.135762891  | 8.96E-05    | 0.010543906      | 1.291643969  |
| NBEA     | -0.454445617    | 2.515692331        | -4.131829365 | 9.09E-05    | 0.010600454      | 1.279720387  |
| WBP4     | -0.162557875    | 3.816927692        | -4.126669945 | 9.25E-05    | 0.010600454      | 1.270728295  |
| TCF25    | 0.138328863     | 6.966272345        | 4.128693893  | 9.19E-05    | 0.010600454      | 1.232776921  |
| WWC2     | -0.285799328    | 4.914778638        | -4.12348098  | 9.36E-05    | 0.010600454      | 1.228221774  |
| TMEM214  | 0.111644535     | 7.131425908        | 4.125496123  | 9.29E-05    | 0.010600454      | 1.224530917  |
| KLHDC2   | -0.121827167    | 4.782172718        | -4.115327124 | 9.63E-05    | 0.010830405      | 1.211238802  |
| IMPDH1   | 0.159916808     | 5.744370048        | 4.105763553  | 9.97E-05    | 0.011121045      | 1.158486279  |
| ZBTB14   | -0.164017534    | 3.540121875        | -4.095756202 | 0.00010326  | 0.011437569      | 1.168656793  |
| SS18     | -0.196355017    | 5.341592048        | -4.089872735 | 0.000105432 | 0.011575525      | 1.109334814  |
| SLTM     | -0.160849277    | 5.472935436        | -4.088240434 | 0.000106042 | 0.011575525      | 1.105052726  |
| LYRM7    | -0.179270771    | 3.78862417         | -4.085144634 | 0.000107209 | 0.011618711      | 1.137003265  |

| Gene     | Log fold change | Average Expression | t            | P-value     | Adjusted P-value | B           |
|----------|-----------------|--------------------|--------------|-------------|------------------|-------------|
| NFATC1   | 0.228176646     | 3.954438508        | 4.082764971  | 0.000108115 | 0.011633137      | 1.120940321 |
| RTKN     | 0.214824664     | 3.428007467        | 4.078985766  | 0.000109568 | 0.011705862      | 1.114853377 |
| PDSS2    | -0.206998895    | 3.87787076         | -4.073111545 | 0.000111863 | 0.011783985      | 1.096384407 |
| ZNF213   | 0.205631996     | 4.585731165        | 4.074545992  | 0.000111299 | 0.011783985      | 1.076413174 |
| SLC7A1   | -0.373884947    | 6.361562501        | -4.06473381  | 0.000115218 | 0.012053056      | 1.022945606 |
| ZNF865   | 0.210190976     | 4.565038375        | 4.058882615  | 0.000117618 | 0.012219256      | 1.031739773 |
| TRAF5    | -0.259826247    | 3.504169606        | -4.046737338 | 0.000122753 | 0.012665462      | 1.016719769 |
| MBNL1    | -0.230409628    | 7.043340342        | -4.043486471 | 0.000124164 | 0.012723877      | 0.959023017 |
| GMPPB    | 0.166883209     | 4.103838916        | 4.040878449  | 0.000125307 | 0.012754253      | 0.983495465 |
| TTC14    | -0.279044061    | 3.373045466        | -4.027448608 | 0.000131355 | 0.012761172      | 0.96046304  |
| HDAC9    | -0.322034205    | 2.93685236         | -4.026795217 | 0.000131657 | 0.012761172      | 0.958582092 |
| NR4A3    | -0.455045196    | 5.204685634        | -4.032498395 | 0.000129049 | 0.012761172      | 0.948926862 |
| SENP2    | -0.170003705    | 4.945437393        | -4.03200353  | 0.000129273 | 0.012761172      | 0.937723346 |
| STX5     | 0.169502196     | 5.806787924        | 4.035747393  | 0.000127586 | 0.012761172      | 0.931464466 |
| KRIT1    | -0.198287361    | 4.207953914        | -4.022766995 | 0.000133529 | 0.012761172      | 0.920395076 |
| HK2      | -0.330031327    | 5.150617754        | -4.026290451 | 0.00013189  | 0.012761172      | 0.911110966 |
| GFPT2    | 0.129589302     | 6.503074872        | 4.026159482  | 0.000131951 | 0.012761172      | 0.897220082 |
| SLC30A9  | -0.154620534    | 5.681041488        | -4.02236389  | 0.000133718 | 0.012761172      | 0.889847976 |
| ATP8B1   | -0.41129837     | 5.899632055        | -4.022089154 | 0.000133847 | 0.012761172      | 0.884263942 |
| RPF2     | -0.137718532    | 5.311659101        | -4.017970509 | 0.000135792 | 0.012865201      | 0.879763735 |
| VPS51    | 0.188324137     | 6.821742012        | 4.015990464  | 0.000136737 | 0.012873743      | 0.865551189 |
| STYX     | -0.220185171    | 4.33725848         | -4.00900625  | 0.00014012  | 0.013082917      | 0.874335912 |
| FBRSL1   | 0.169165634     | 4.821798694        | 4.007834197  | 0.000140695 | 0.013082917      | 0.860278927 |
| SRM      | 0.215336055     | 7.019175171        | 4.001288099  | 0.000143952 | 0.013303616      | 0.820950049 |
| DGKI     | -0.387627493    | 4.003025498        | -3.997979727 | 0.000145625 | 0.013333581      | 0.850920754 |
| SPTLC3   | -0.237344842    | 2.509336805        | -3.99715261  | 0.000146046 | 0.013333581      | 0.849563242 |
| DUSC1    | 0.167719697     | 5.049675164        | 3.989355876  | 0.000150075 | 0.013618845      | 0.796409898 |
| RCAF16   | -0.215882646    | 3.749407762        | -3.98641814  | 0.00015162  | 0.013676699      | 0.815032394 |
| PTPN13   | -0.25838587     | 6.833740535        | -3.980420622 | 0.000154823 | 0.01388246       | 0.752216564 |
| AP4B1    | 0.223886478     | 2.725771101        | 3.974972651  | 0.000157788 | 0.013899525      | 0.799026434 |
| SGSH     | 0.115083093     | 6.229337668        | 3.977535605  | 0.000156387 | 0.013899525      | 0.74129419  |
| REEP3    | -0.218678013    | 5.559262405        | -3.974786691 | 0.000157891 | 0.013899525      | 0.73714401  |
| ERBIN    | -0.258495008    | 6.036175868        | -3.972866263 | 0.000158949 | 0.013899525      | 0.728303584 |
| PPP2R5D  | 0.156308925     | 5.904852937        | 3.971644174  | 0.000159627 | 0.013899525      | 0.726503316 |
| PTPA     | 0.123525104     | 6.919767174        | 3.956631947  | 0.000168177 | 0.014559878      | 0.676756174 |
| ZDHHC8   | 0.11974546      | 5.922642323        | 3.953479318  | 0.000170028 | 0.014635975      | 0.666772706 |
| CACNB3   | 0.156539274     | 4.381478004        | 3.94848767   | 0.000172998 | 0.014807025      | 0.687678445 |
| GABPA    | -0.175638637    | 4.605709174        | -3.943310267 | 0.000176131 | 0.01499002       | 0.659879617 |
| GPATCH3  | 0.168232093     | 3.628358312        | 3.933460971  | 0.000182242 | 0.015314005      | 0.660479594 |
| PELI3    | 0.190763069     | 4.250853172        | 3.931195023  | 0.000183676 | 0.015314005      | 0.631933139 |
| MOB2     | 0.203835588     | 4.081970548        | 3.929086839  | 0.000185021 | 0.015314005      | 0.631925803 |
| HM13     | 0.145536927     | 8.152803381        | 3.932307089  | 0.000182971 | 0.015314005      | 0.618916341 |
| KLHL35   | 0.548466834     | -0.067311872       | 3.929542402  | 0.000184729 | 0.015314005      | 0.122490329 |
| NIPA1    | -0.28386922     | 3.143569113        | -3.920850781 | 0.000190363 | 0.015447405      | 0.62873857  |
| NEDD4    | -0.288380236    | 4.385058781        | -3.920287117 | 0.000190734 | 0.015447405      | 0.597490486 |
| BICD1    | -0.277007238    | 4.067378472        | -3.922543631 | 0.000189253 | 0.015447405      | 0.594730936 |
| SMURF2   | -0.302976939    | 5.204137854        | -3.922678818 | 0.000189165 | 0.015447405      | 0.58595407  |
| MTHFD2   | -0.222728045    | 5.931491427        | -3.918487723 | 0.000191923 | 0.015460576      | 0.55998528  |
| KLF9     | -0.256426023    | 4.966092688        | -3.915473359 | 0.000193931 | 0.015539209      | 0.570029142 |
| RPL28    | 0.294344137     | 9.710130806        | 3.913659851  | 0.000195148 | 0.015554034      | 0.588292397 |
| RNFT1    | -0.184845456    | 2.307757228        | -3.908601431 | 0.000198583 | 0.015625147      | 0.585199443 |
| SELENOO  | 0.232189261     | 3.877890603        | 3.908819307  | 0.000198434 | 0.015625147      | 0.573342587 |
| MED15    | 0.123587887     | 6.511314176        | 3.907771508  | 0.000199152 | 0.015625147      | 0.519862497 |
| CNOT10   | 0.132208954     | 4.394555074        | 3.905960636  | 0.000200399 | 0.015641526      | 0.553387038 |
| NUDT18   | 0.24152704      | 3.070249745        | 3.903356877  | 0.000202206 | 0.015701154      | 0.578029559 |
| VARS     | 0.126145109     | 6.49368658         | 3.90060234   | 0.000204133 | 0.015769562      | 0.496687253 |
| TRPM7    | -0.267775534    | 5.827134773        | -3.898070659 | 0.000205921 | 0.015826476      | 0.490478713 |
| PKNOX1   | -0.170602743    | 4.683564458        | -3.895028075 | 0.000208089 | 0.015831547      | 0.503415792 |
| ALPK2    | -0.334940289    | 5.400052428        | -3.895674928 | 0.000207626 | 0.015831547      | 0.487761227 |
| TMEM184C | -0.143397651    | 5.540114535        | -3.89185277  | 0.000210374 | 0.01592502       | 0.47628073  |
| LONRF1   | -0.260976635    | 3.465584677        | -3.88007619  | 0.000219063 | 0.016332871      | 0.496936615 |
| ORC5     | 0.190404383     | 3.347553121        | 3.879128619  | 0.000219777 | 0.016332871      | 0.4932039   |
| PINK1    | 0.151467544     | 4.875322563        | 3.880618045  | 0.000218656 | 0.016332871      | 0.45503961  |
| C17orf97 | 0.3738605       | 1.192324686        | 3.878702442  | 0.000220099 | 0.016332871      | 0.421535665 |
| ANKRD13B | 0.224564476     | 4.322104598        | 3.867850592  | 0.000228447 | 0.016605867      | 0.436333939 |
| OPLAH    | 0.16964467      | 4.170025649        | 3.865376217  | 0.000230392 | 0.016605867      | 0.432001207 |
| BAG6     | 0.108733604     | 7.873821161        | 3.871493182  | 0.000225612 | 0.016605867      | 0.421789484 |
| BRF1     | 0.172694249     | 4.718201846        | 3.865930587  | 0.000229955 | 0.016605867      | 0.41652925  |
| FPGS     | 0.15431901      | 5.455366822        | 3.868309444  | 0.000228088 | 0.016605867      | 0.403146842 |
| PTPN23   | 0.135505879     | 6.982300781        | 3.867721654  | 0.000228548 | 0.016605867      | 0.396848777 |

| Gene      | Log fold change | Average Expression | t            | P-value     | Adjusted P-value | B            |
|-----------|-----------------|--------------------|--------------|-------------|------------------|--------------|
| SGPP1     | -0.173112232    | 4.699774945        | -3.862048369 | 0.000233033 | 0.016637041      | 0.3996477    |
| ALG3      | 0.180441177     | 5.236578846        | 3.862353943  | 0.00023279  | 0.016637041      | 0.388056567  |
| LPIN2     | -0.203210443    | 5.651252628        | -3.858662369 | 0.000235751 | 0.016751641      | 0.370045217  |
| PHAX      | -0.177201412    | 5.877160807        | -3.848535999 | 0.000244059 | 0.017260586      | 0.335888726  |
| GBP1      | -0.360077801    | 4.986768263        | -3.842498734 | 0.000249145 | 0.017475471      | 0.340429929  |
| EIF2B4    | 0.194737843     | 4.922494569        | 3.842178323  | 0.000249418 | 0.017475471      | 0.333667763  |
| TRIM68    | 0.237511119     | 2.875231273        | 3.837594411  | 0.000253351 | 0.017668867      | 0.374222879  |
| C3orf58   | -0.226126635    | 4.484756733        | -3.834478937 | 0.000256058 | 0.017775358      | 0.333878996  |
| ZNF674    | -0.363803389    | 0.878530875        | -3.82789256  | 0.000261872 | 0.018095574      | 0.174718644  |
| CCDC28B   | 0.317524916     | 2.225801655        | 3.817000787  | 0.000271764 | 0.018638763      | 0.306360439  |
| KITLG     | -0.336091569    | 6.688324879        | -3.81652187  | 0.000272207 | 0.018638763      | 0.233713322  |
| MLLT3     | 0.296576131     | 3.68347239         | 3.809776866  | 0.000278521 | 0.018762629      | 0.282652257  |
| AP2A1     | 0.118487986     | 7.937477936        | 3.809273002  | 0.000278998 | 0.018762629      | 0.229246451  |
| STIP1     | 0.142974737     | 7.143542889        | 3.812398117  | 0.000276051 | 0.018762629      | 0.226163986  |
| MAP2K3    | -0.302587667    | 6.536569544        | -3.809973075 | 0.000278335 | 0.018762629      | 0.21337423   |
| ISYNA1    | 0.24101549      | 3.69154865         | 3.804815366  | 0.000283254 | 0.018809987      | 0.264113309  |
| RASA2     | -0.366329278    | 3.925605774        | -3.806717183 | 0.000281431 | 0.018809987      | 0.257415059  |
| USP12     | -0.227991172    | 4.182484426        | -3.801221319 | 0.000286731 | 0.018809987      | 0.232129186  |
| SUDS3     | -0.14693021     | 4.456171382        | -3.801289205 | 0.000286665 | 0.018809987      | 0.223400887  |
| ARHGDI4   | 0.135712239     | 8.147761136        | 3.800429151  | 0.000287503 | 0.018809987      | 0.207906705  |
| PAK4      | 0.186139355     | 4.955729258        | 3.799348832  | 0.000288559 | 0.018809987      | 0.210104089  |
| PLCD1     | 0.183421317     | 5.186049927        | 3.798255862  | 0.00028963  | 0.018809987      | 0.192088238  |
| MBOAT7    | 0.135450094     | 6.725798185        | 3.798193378  | 0.000289692 | 0.018809987      | 0.177063583  |
| ZNF385A   | 0.307827138     | 5.010030805        | 3.791762534  | 0.000296077 | 0.019142073      | 0.178501805  |
| CCDC102A  | 0.254471063     | 3.690003772        | 3.787054609  | 0.000300836 | 0.019284252      | 0.210243584  |
| C1orf94   | 1.217045694     | -4.325427959       | 3.787558798  | 0.000300323 | 0.019284252      | -1.800731774 |
| UBTF      | 0.10945776      | 7.103248139        | 3.782403924  | 0.00030561  | 0.019507217      | 0.133452056  |
| AP1AR     | -0.202039562    | 3.820026589        | -3.778524749 | 0.000309646 | 0.019681479      | 0.175902746  |
| MARCKS    | -0.112648561    | 8.796832226        | -3.769232419 | 0.000319524 | 0.020055435      | 0.125672025  |
| ARHGAP22  | 0.256238643     | 5.005111097        | 3.770129615  | 0.000318557 | 0.020055435      | 0.115322873  |
| MAGI2-AS3 | -0.13035725     | 5.659663206        | -3.769948151 | 0.000318752 | 0.020055435      | 0.093512125  |
| UCK1      | 0.158979958     | 4.799372464        | 3.762421114  | 0.000326954 | 0.020352215      | 0.09382649   |
| EGR1      | 0.902168994     | 6.810030351        | 3.763047756  | 0.000326264 | 0.020352215      | 0.071922969  |
| FIZ1      | 0.180274275     | 3.938184887        | 3.761110295  | 0.000328403 | 0.020358272      | 0.122627294  |
| GPLOW     | 0.198978766     | 4.351074194        | 3.755496367  | 0.000334677 | 0.020662193      | 0.088710992  |
| PRKCI     | -0.213188489    | 4.603567934        | -3.752951564 | 0.000337559 | 0.020670667      | 0.066945909  |
| RALGPS2   | -0.285576451    | 5.476268076        | -3.753811397 | 0.000336582 | 0.020670667      | 0.045973636  |
| ADO       | -0.123933648    | 5.077587352        | -3.749107353 | 0.000341957 | 0.020771108      | 0.042947764  |
| RYK       | -0.099468182    | 6.29346394         | -3.749681251 | 0.000341297 | 0.020771108      | 0.026579681  |
| VEZT      | -0.14524929     | 5.377023165        | -3.742675629 | 0.000349437 | 0.021055693      | 0.017143004  |
| EHMT2     | 0.177692375     | 5.895375297        | 3.743814323  | 0.000348102 | 0.021055693      | 0.011161201  |
| RARG      | 0.142326293     | 7.413476339        | 3.739996763  | 0.000352599 | 0.021161549      | 0.009177484  |
| OSGEPL1   | 0.255111912     | 1.747334524        | 3.738355433  | 0.000354549 | 0.021194173      | 0.040667057  |
| OCEL1     | 0.234706983     | 3.555348854        | 3.733463404  | 0.000360424 | 0.02125079       | 0.055234776  |
| LMNA      | 0.142748103     | 10.63727751        | 3.731711927  | 0.00036255  | 0.02125079       | 0.049133473  |
| USP53     | -0.436086626    | 5.689863853        | -3.733732233 | 0.000360099 | 0.02125079       | -0.011316766 |
| MSL1      | -0.169213001    | 6.004124613        | -3.732487051 | 0.000361608 | 0.02125079       | -0.026083632 |
| SART1     | 0.211672395     | 6.448224005        | 3.732252668  | 0.000361892 | 0.02125079       | -0.027251969 |
| USP20     | 0.143332488     | 4.269455515        | 3.72604247   | 0.000369513 | 0.021574999      | -0.000879371 |
| A4GALT    | 0.178144371     | 6.119492771        | 3.72386619   | 0.00037222  | 0.021649125      | -0.051902981 |
| SIX5      | 0.234204481     | 3.348596153        | 3.710391082  | 0.000389405 | 0.02171094       | -0.01092018  |
| CPSF4     | 0.23074923      | 4.182432959        | 3.720340778  | 0.000376645 | 0.02171094       | -0.012519347 |
| HIP1R     | 0.211216815     | 3.429358216        | 3.709748381  | 0.000390243 | 0.02171094       | -0.013637801 |
| CRY1      | -0.21265703     | 3.768772653        | -3.715976348 | 0.000382192 | 0.02171094       | -0.023715041 |
| NEK1      | -0.295590716    | 4.777719625        | -3.716172887 | 0.000381941 | 0.02171094       | -0.048432051 |
| FAM102B   | -0.274801359    | 4.725748207        | -3.711718986 | 0.000387678 | 0.02171094       | -0.057969848 |
| DNAJB2    | 0.141736003     | 5.873914115        | 3.720538861  | 0.000376395 | 0.02171094       | -0.059744082 |
| PPP1R37   | 0.183530205     | 5.806505945        | 3.714357868  | 0.000384269 | 0.02171094       | -0.078040139 |
| WIPI2     | 0.106414109     | 6.344099156        | 3.714516827  | 0.000384065 | 0.02171094       | -0.081508706 |
| ZMAT2     | 0.10440008      | 6.306969379        | 3.710912484  | 0.000388726 | 0.02171094       | -0.092388759 |
| RHOG      | 0.159031368     | 6.275164448        | 3.710648438  | 0.00038907  | 0.02171094       | -0.093115527 |
| PBRM1     | -0.273835781    | 5.943743675        | -3.709491987 | 0.000390578 | 0.02171094       | -0.09415671  |
| ZFH2      | 0.398011475     | 0.566619232        | 3.706883015  | 0.000394001 | 0.021820704      | -0.114979159 |
| FAM83G    | -0.297959306    | 3.792874725        | -3.704510847 | 0.000397138 | 0.021913887      | -0.03107779  |
| CUL5      | -0.269918689    | 4.752082652        | -3.702429123 | 0.000399911 | 0.021923371      | -0.092253273 |
| PPP1R9B   | 0.116661686     | 7.069330625        | 3.70219735   | 0.000400221 | 0.021923371      | -0.112423216 |
| GJC1      | -0.460911341    | 4.233130727        | -3.698360038 | 0.000405384 | 0.022045872      | -0.087204848 |
| APBB1     | 0.124813337     | 5.818094618        | 3.698432911  | 0.000405285 | 0.022045872      | -0.125919812 |
| PAPOLA    | -0.158778695    | 7.031438212        | -3.695219244 | 0.000409657 | 0.022198123      | -0.135929407 |
| KHSRP     | 0.096673605     | 7.868583538        | 3.691103974  | 0.000415321 | 0.022424375      | -0.132114798 |

| Gene       | Log fold change | Average Expression | t            | P-value     | Adjusted P-value | B            |
|------------|-----------------|--------------------|--------------|-------------|------------------|--------------|
| USP5       | 0.098145782     | 6.585597176        | 3.688724846  | 0.00041863  | 0.022522281      | -0.159935938 |
| MACF1      | -0.335919852    | 7.50681922         | -3.687610843 | 0.000420187 | 0.022525638      | -0.151305028 |
| SLC22A15   | -0.326142794    | 2.009207023        | -3.678382664 | 0.000433305 | 0.022609663      | -0.096436723 |
| ZSCAN12    | -0.380943633    | 1.517281409        | -3.678066169 | 0.000433762 | 0.022609663      | -0.111479218 |
| MOB1B      | -0.232478825    | 4.458923374        | -3.682180474 | 0.00042786  | 0.022609663      | -0.143407842 |
| VGLL3      | -0.279089949    | 8.705675528        | -3.680938959 | 0.000429633 | 0.022609663      | -0.149981915 |
| UCK2       | -0.241743311    | 5.05915692         | -3.682264057 | 0.000427741 | 0.022609663      | -0.164954528 |
| SLC38A1    | -0.320906135    | 6.776361395        | -3.684141655 | 0.000425074 | 0.022609663      | -0.171855425 |
| PRKACB     | -0.136423382    | 5.353874169        | -3.680621767 | 0.000430087 | 0.022609663      | -0.173126363 |
| MEN1       | 0.198145848     | 5.350119782        | 3.678433975  | 0.000433231 | 0.022609663      | -0.17704145  |
| ARMC7      | 0.167744945     | 2.825082243        | 3.67551028   | 0.000437467 | 0.02261507       | -0.110909969 |
| PHLPP2     | -0.335706291    | 3.846106915        | -3.674891038 | 0.00043837  | 0.02261507       | -0.137803858 |
| DDX54      | 0.114384662     | 5.817737169        | 3.676004877  | 0.000436748 | 0.02261507       | -0.196574323 |
| TTL7       | -0.392554793    | 1.52854077         | -3.673742677 | 0.000440048 | 0.022624149      | -0.146170729 |
| UBXN2A     | -0.134145208    | 4.673106186        | -3.670153688 | 0.000445331 | 0.022817904      | -0.184021461 |
| TCHP       | 0.177719536     | 3.852572961        | 3.66892584   | 0.000447152 | 0.022833559      | -0.152249565 |
| SGTB       | -0.184889491    | 4.091010876        | -3.665822208 | 0.000451788 | 0.022847333      | -0.178119546 |
| SERPINB8   | -0.228329516    | 4.746140507        | -3.667342771 | 0.000449511 | 0.022847333      | -0.202295166 |
| INF2       | 0.145965869     | 7.286861847        | 3.665699393  | 0.000451972 | 0.022847333      | -0.222760471 |
| PSMB10     | 0.247528107     | 3.224473978        | 3.661128641  | 0.000458885 | 0.023119187      | -0.151671742 |
| CDC42BPA   | -0.235534248    | 6.238744506        | -3.659937614 | 0.000460702 | 0.023133396      | -0.246543775 |
| ARHGAP39   | 0.199822645     | 2.85354167         | 3.648513086  | 0.000478489 | 0.023459227      | -0.190809149 |
| C1D        | -0.204443655    | 2.341325739        | -3.640632348 | 0.000491138 | 0.023459227      | -0.197515254 |
| SAC3D1     | 0.242420152     | 3.502055546        | 3.647434069  | 0.000480203 | 0.023459227      | -0.201817335 |
| LIMD2      | 0.227641432     | 2.924597232        | 3.64336106   | 0.000486723 | 0.023459227      | -0.203274219 |
| KLHL2      | -0.205856608    | 3.258042699        | -3.641876107 | 0.000489121 | 0.023459227      | -0.214538654 |
| HDAC11     | 0.173731681     | 3.684941353        | 3.641092302  | 0.000490391 | 0.023459227      | -0.227612869 |
| TRIM28     | 0.155808776     | 8.119257323        | 3.650719195  | 0.000475005 | 0.023459227      | -0.250434174 |
| LRFN3      | 0.145962        | 5.117812102        | 3.651796171  | 0.000473312 | 0.023459227      | -0.245403699 |
| NFKB2      | 0.185498701     | 5.123431713        | 3.648710359  | 0.000478177 | 0.023459227      | -0.262233223 |
| ASMTL      | 0.167828571     | 5.051194808        | 3.647599915  | 0.000479939 | 0.023459227      | -0.263912689 |
| TELO2      | 0.190660396     | 4.576867282        | 3.640035783  | 0.000492108 | 0.023459227      | -0.268137803 |
| MARK4      | 0.156952449     | 5.94190108         | 3.65172228   | 0.000473428 | 0.023459227      | -0.269252487 |
| IDH3G      | 0.225734068     | 5.597020857        | 3.645972884  | 0.000482532 | 0.023459227      | -0.281223028 |
| EPS15L1    | 0.133894082     | 5.364930811        | 3.643335834  | 0.000486763 | 0.023459227      | -0.284521216 |
| MYBBP1A    | 0.1179643       | 6.157068329        | 3.644347474  | 0.000485136 | 0.023459227      | -0.294642343 |
| ZCCHC14    | -0.216749117    | 6.731432286        | -3.64015321  | 0.000491917 | 0.023459227      | -0.302554941 |
| ZFPL1      | 0.201580967     | 2.518879796        | 3.635752843  | 0.000499128 | 0.023710938      | -0.211422386 |
| RBM15      | -0.249246447    | 2.428941939        | -3.633770309 | 0.000502409 | 0.023710938      | -0.219657628 |
| COQ7       | -0.14763268     | 3.161389543        | -3.633101643 | 0.000503521 | 0.023710938      | -0.231566431 |
| MAK16      | -0.223146029    | 3.875494573        | -3.632059076 | 0.000505258 | 0.023710938      | -0.265546963 |
| ATIC       | 0.125269348     | 6.460109309        | 3.632917403  | 0.000503827 | 0.023710938      | -0.329012366 |
| SH2D4A     | -0.209109594    | 5.219020967        | -3.630282408 | 0.000508232 | 0.023776439      | -0.317954949 |
| KIAA1109   | -0.369556492    | 5.430957883        | -3.628860904 | 0.000510624 | 0.023814365      | -0.329797916 |
| RHBDD2     | 0.164021213     | 5.932854676        | 3.626671788  | 0.000514328 | 0.023913073      | -0.345535505 |
| FTH1       | 0.266283376     | 9.6883212          | 3.621798643  | 0.000522665 | 0.024209826      | -0.299673337 |
| RADIL      | 0.389638124     | 1.702855776        | 3.62026192   | 0.000525321 | 0.024209826      | -0.322466034 |
| TMEM102    | 0.432072874     | -0.124321669       | 3.620139951  | 0.000525532 | 0.024209826      | -0.478648763 |
| SERINC3    | -0.150912189    | 7.352570452        | -3.619100706 | 0.000527336 | 0.024218861      | -0.360038522 |
| C16orf52   | -0.23992122     | 3.663838903        | -3.616789236 | 0.000531369 | 0.02425619       | -0.286060041 |
| WASL       | -0.196368407    | 6.017048397        | -3.617245642 | 0.00053057  | 0.02425619       | -0.374702175 |
| RNASEK     | 0.374919892     | 1.024010551        | 3.615245677  | 0.000534079 | 0.024306224      | -0.354880356 |
| LRRK2      | -0.310745774    | 3.697537029        | -3.612157289 | 0.00053954  | 0.024480793      | -0.30091279  |
| CSNK1G2    | 0.134863866     | 6.492699089        | 3.610871899  | 0.000541828 | 0.024510799      | -0.395213934 |
| SORBS3     | 0.245946889     | 7.625547937        | 3.608445261  | 0.000546173 | 0.024633398      | -0.390668861 |
| RNF138     | -0.181723251    | 3.544573481        | -3.60702385  | 0.000548734 | 0.024675011      | -0.319967275 |
| ZFC3H1     | -0.310650834    | 4.053920773        | -3.598265969 | 0.000564765 | 0.025208995      | -0.405516356 |
| COG1       | 0.110367612     | 4.727977434        | 3.597800284  | 0.000565629 | 0.025208995      | -0.40641611  |
| SLC25A1    | 0.206323858     | 6.55098851         | 3.598966431  | 0.000563466 | 0.025208995      | -0.430719647 |
| RNF24      | -0.206868197    | 6.04313865         | -3.59633981  | 0.000568349 | 0.025255505      | -0.438244392 |
| MAGED1     | 0.100771135     | 8.072603753        | 3.593863169  | 0.000572991 | 0.025274657      | -0.418373383 |
| SOCS6      | -0.205043775    | 4.845977168        | -3.592419205 | 0.000575713 | 0.025274657      | -0.423428251 |
| SASH1      | -0.228145504    | 7.215031413        | -3.593364717 | 0.000573929 | 0.025274657      | -0.441093502 |
| LNPB       | -0.168307841    | 5.462098598        | -3.591773174 | 0.000576935 | 0.025274657      | -0.443044546 |
| CTDSP1     | 0.150676876     | 7.342935895        | 3.591649376  | 0.00057717  | 0.025274657      | -0.444498715 |
| ZSWIM6     | -0.323526265    | 3.109707887        | -3.585517607 | 0.000588896 | 0.025713422      | -0.359794748 |
| TBC1D31    | 0.256681317     | 1.815630738        | 3.581518419  | 0.000596666 | 0.025754073      | -0.375271498 |
| EIF4H      | 0.078836754     | 7.236233068        | 3.582356742  | 0.000595029 | 0.025754073      | -0.471564359 |
| ST6GALNAC4 | 0.174736462     | 5.547283024        | 3.581767369  | 0.000596179 | 0.025754073      | -0.474316764 |
| PITPNB     | -0.161019638    | 5.925321791        | -3.582852271 | 0.000594064 | 0.025754073      | -0.477178924 |

| Gene       | Log fold change | Average Expression | t            | P-value     | Adjusted P-value | B            |
|------------|-----------------|--------------------|--------------|-------------|------------------|--------------|
| LARP4B     | -0.203814444    | 5.082449967        | -3.577730427 | 0.000604115 | 0.02600109       | -0.479157611 |
| CBL        | -0.315692694    | 4.166663103        | -3.576101888 | 0.000607344 | 0.026028479      | -0.460715091 |
| KIAA1211   | -0.47613036     | 0.379276119        | -3.575668307 | 0.000608207 | 0.026028479      | -0.595818961 |
| NUP85      | 0.148923504     | 4.06753551         | 3.571994141  | 0.000615563 | 0.026264147      | -0.45171713  |
| PNPLA6     | 0.127434695     | 5.93706266         | 3.571181886  | 0.0006172   | 0.026264147      | -0.510096098 |
| TMUB1      | 0.231119748     | 4.547735852        | 3.568335719  | 0.000622971 | 0.026350122      | -0.477623723 |
| MALT1      | -0.274973234    | 4.654921077        | -3.567910895 | 0.000623837 | 0.026350122      | -0.481023278 |
| PURB       | -0.234240457    | 5.964151163        | -3.567601435 | 0.000624469 | 0.026350122      | -0.520261414 |
| ZNF480     | 0.182634987     | 3.823526492        | 3.564351061  | 0.000631137 | 0.026409567      | -0.462597575 |
| BTG2       | 0.42417629      | 4.197394101        | 3.565840755  | 0.000628072 | 0.026409567      | -0.4633905   |
| CCDC85B    | 0.328753394     | 6.94206842         | 3.565089152  | 0.000629617 | 0.026409567      | -0.530997883 |
| CLMP       | -0.135232007    | 8.371915616        | -3.561234141 | 0.000637595 | 0.026421389      | -0.507420613 |
| U2SURP     | -0.16049339     | 5.642251186        | -3.56316621  | 0.000633584 | 0.026421389      | -0.528875977 |
| TSPAN17    | 0.114074691     | 5.426908594        | 3.560935988  | 0.000638216 | 0.026421389      | -0.533118767 |
| FUT8       | -0.142941264    | 6.102206878        | -3.560830697 | 0.000638435 | 0.026421389      | -0.54224543  |
| INPP4A     | -0.196042935    | 4.234555589        | -3.559107885 | 0.000642036 | 0.026497609      | -0.490601274 |
| IL411      | 0.296562349     | 1.592665219        | 3.557193484  | 0.00064606  | 0.026590824      | -0.454572252 |
| FRMD5      | -0.45275182     | 1.257888259        | -3.553322432 | 0.000654269 | 0.026671466      | -0.46846697  |
| CREBZF     | -0.305970055    | 3.287571038        | -3.553870321 | 0.000653101 | 0.026671466      | -0.481177127 |
| SPCS2      | 0.146830683     | 3.832361087        | 3.554229958  | 0.000652336 | 0.026671466      | -0.493832479 |
| FAM91A1    | -0.197860212    | 4.691385197        | -3.551279186 | 0.000658642 | 0.026671466      | -0.542723386 |
| SLC6A8     | 0.13053586      | 5.39886838         | 3.552801111  | 0.000655382 | 0.026671466      | -0.557868305 |
| RNF224     | 1.147663631     | -4.229898317       | 3.551397955  | 0.000658387 | 0.026671466      | -2.176596781 |
| ADAL       | -0.16939053     | 2.854314826        | -3.548717841 | 0.000664163 | 0.026822932      | -0.46354569  |
| MON1A      | 0.197101777     | 3.87618841         | 3.546315669  | 0.000669381 | 0.026880902      | -0.518710801 |
| FSCN1      | 0.181976038     | 8.71078901         | 3.547188751  | 0.00066748  | 0.026880902      | -0.538041388 |
| TWF2       | 0.168757238     | 5.613795479        | 3.545595873  | 0.000670952 | 0.026880902      | -0.5811157   |
| IFT88      | -0.183222925    | 3.299475648        | -3.544081638 | 0.000674268 | 0.026942113      | -0.494693185 |
| STRADA     | 0.284696383     | 0.898819051        | 3.542174735  | 0.000678467 | 0.026966813      | -0.5517944   |
| RABEP1     | -0.138000425    | 6.593265251        | -3.542254319 | 0.000678291 | 0.026966813      | -0.598295151 |
| ZBED6      | -0.681782407    | 1.422917967        | -3.54046501  | 0.000682252 | 0.027039357      | -0.490912014 |
| C19orf48   | 0.139948196     | 4.472322093        | 3.538925923  | 0.000685677 | 0.027039357      | -0.566629463 |
| MED16      | 0.144877961     | 6.164177486        | 3.539196749  | 0.000685073 | 0.027039357      | -0.606957967 |
| ATAD3A     | 0.186557812     | 4.426195674        | 3.537976303  | 0.000687798 | 0.027052187      | -0.57225297  |
| HINT3      | -0.174692536    | 4.153468796        | -3.536083903 | 0.000692043 | 0.027133291      | -0.554315656 |
| TTLL12     | 0.1246159       | 5.556258207        | 3.535453917  | 0.000693462 | 0.027133291      | -0.613120533 |
| PNMAL2     | 0.208000009     | 2.994612164        | 3.529368267  | 0.000707311 | 0.027320352      | -0.534224037 |
| ZNF710-AS1 | 0.380525253     | 0.877530417        | 3.531715778  | 0.000701938 | 0.027320352      | -0.596195238 |
| PTBP1      | 0.098021714     | 7.729849333        | 3.531700099  | 0.000701974 | 0.027320352      | -0.608244421 |
| CCAR1      | -0.152498229    | 5.45224619         | -3.530066408 | 0.000705709 | 0.027320352      | -0.625185836 |
| FHOD1      | 0.226606546     | 5.55138205         | 3.529491761  | 0.000707028 | 0.027320352      | -0.634414149 |
| SLC25A11   | 0.172139851     | 5.103066906        | 3.52758354   | 0.000711422 | 0.027368709      | -0.617692482 |
| MID1IP1    | -0.141867374    | 5.248961084        | -3.527248285 | 0.000712197 | 0.027368709      | -0.626792485 |
| LPGAT1     | -0.230043455    | 5.554739039        | -3.524091716 | 0.000719531 | 0.027580177      | -0.646137456 |
| WDR11      | -0.164209476    | 5.157580324        | -3.52295449  | 0.00072219  | 0.027611864      | -0.638642061 |
| THOP1      | 0.148060902     | 4.967169799        | 3.519753778  | 0.000729726 | 0.027829342      | -0.640956095 |
| PLCL1      | -0.308359992    | 2.611429262        | -3.513825721 | 0.00074388  | 0.028155283      | -0.555931076 |
| FLRT2      | -0.250107595    | 6.931759048        | -3.515075981 | 0.000740873 | 0.028155283      | -0.675818827 |
| CRAT       | 0.119831681     | 6.594063384        | 3.514038826  | 0.000743366 | 0.028155283      | -0.682433569 |
| ALDOA      | 0.196304651     | 10.01998868        | 3.511697199  | 0.000749025 | 0.028278971      | -0.611680484 |
| DNAAF2     | -0.15770924     | 3.127355714        | -3.508777056 | 0.000756138 | 0.028362901      | -0.60373466  |
| KCTD9      | -0.149699329    | 4.508153883        | -3.508467433 | 0.000756896 | 0.028362901      | -0.661172313 |
| TMEM250    | 0.095628768     | 6.368877724        | 3.508579036  | 0.000756623 | 0.028362901      | -0.698730173 |
| STX3       | -0.216742811    | 3.958574505        | -3.506054557 | 0.000762828 | 0.028375166      | -0.635803851 |
| TRIM24     | -0.191887432    | 4.159617874        | -3.506035679 | 0.000762875 | 0.028375166      | -0.657738818 |
| REXO4      | 0.121326194     | 4.968767575        | 3.507438112  | 0.000759421 | 0.028375166      | -0.6798107   |
| CCDC112    | -0.238761775    | 2.439224781        | -3.502097227 | 0.000772652 | 0.028597607      | -0.593088355 |
| JOSD1      | -0.13710911     | 6.21433537         | -3.502342015 | 0.000772041 | 0.028597607      | -0.715977156 |
| MRPL49     | 0.107147567     | 5.15600004         | 3.499875927  | 0.000778218 | 0.028606932      | -0.703814523 |
| HSPA1B     | 0.227913083     | 4.993090733        | 3.499352441  | 0.000779536 | 0.028606932      | -0.704379804 |
| SCAMP4     | 0.15015019      | 6.918833341        | 3.50044737   | 0.000776783 | 0.028606932      | -0.720031274 |
| ARF3       | 0.080787298     | 7.000143237        | 3.49896987   | 0.0007805   | 0.028606932      | -0.722123285 |
| TUT1       | 0.196600148     | 2.333310399        | 3.497838015  | 0.000783359 | 0.02862571       | -0.609263551 |
| LRIF1      | 0.165687714     | 3.627153635        | 3.49726388   | 0.000784813 | 0.02862571       | -0.649299722 |
| SNX30      | -0.244535195    | 5.460957192        | -3.496103237 | 0.00078776  | 0.028663799      | -0.728625949 |
| POLR2E     | 0.193585301     | 7.122543734        | 3.495247628  | 0.000789939 | 0.028673834      | -0.733058953 |
| ATF7       | 0.113710194     | 4.946653077        | 3.493418427  | 0.000794617 | 0.028774309      | -0.715583196 |
| TACO1      | 0.174387936     | 4.176246346        | 3.492379253  | 0.000797286 | 0.028801735      | -0.689335288 |
| E2F5       | -0.267681205    | 1.062135124        | -3.489618807 | 0.000804418 | 0.028920669      | -0.670055365 |
| GN5        | 0.145804069     | 5.884153976        | 3.490047854  | 0.000803306 | 0.028920669      | -0.749850851 |

| Gene      | Log fold change | Average Expression | t            | P-value     | Adjusted P-value | B            |
|-----------|-----------------|--------------------|--------------|-------------|------------------|--------------|
| RPLP2     | 0.265542139     | 9.431971875        | 3.487048795  | 0.000811113 | 0.029015718      | -0.700278816 |
| TAF13     | -0.22805042     | 4.724611693        | -3.486388645 | 0.000812841 | 0.029015718      | -0.728630403 |
| RAVER1    | 0.162897469     | 4.732799426        | 3.48724581   | 0.000810598 | 0.029015718      | -0.732688808 |
| ZDHHC17   | -0.30120139     | 4.007282439        | -3.482832152 | 0.00082221  | 0.029211736      | -0.706384375 |
| DRG1      | 0.124168965     | 5.537865608        | 3.482896903  | 0.000822039 | 0.029211736      | -0.765959403 |
| FMN1      | -0.371732035    | 2.862040545        | -3.480227142 | 0.000829138 | 0.029339376      | -0.668027    |
| TNIP1     | 0.120140596     | 6.770837637        | 3.480017334  | 0.000829698 | 0.029339376      | -0.781587501 |
| TRMT2A    | 0.175109039     | 3.844730701        | 3.478357669  | 0.000834143 | 0.029350378      | -0.719728442 |
| NRBP1     | 0.08896822      | 7.558028906        | 3.478276494  | 0.000834361 | 0.029350378      | -0.771501855 |
| TCOF1     | 0.128495127     | 5.330968238        | 3.477721047  | 0.000835855 | 0.029350378      | -0.77487027  |
| CHST14    | 0.11947798      | 5.909258369        | 3.476235618  | 0.00083986  | 0.02942244       | -0.789780889 |
| PER2      | -0.263281962    | 3.070457678        | -3.475037887 | 0.000843103 | 0.029429856      | -0.669473817 |
| SNRPG     | 0.242993346     | 3.387187411        | 3.472700477  | 0.000849465 | 0.029429856      | -0.706449972 |
| AHCTF1    | -0.227999902    | 4.034760832        | -3.473886834 | 0.00084623  | 0.029429856      | -0.740918709 |
| HS6ST1    | -0.21439709     | 4.628138271        | -3.4725634   | 0.00084984  | 0.029429856      | -0.761239989 |
| GNB2      | 0.179603317     | 7.466947938        | 3.474154358  | 0.000845502 | 0.029429856      | -0.789130494 |
| TMEM170B  | -0.301909745    | 2.7584743          | -3.470864072 | 0.000854496 | 0.029523227      | -0.689928627 |
| KIAA1841  | -0.199268224    | 2.714012615        | -3.468191665 | 0.000861867 | 0.029660275      | -0.689569437 |
| FAM122B   | -0.150135131    | 3.634101005        | -3.467289351 | 0.000864369 | 0.029660275      | -0.734294962 |
| C5orf51   | -0.185909895    | 5.562360364        | -3.467297115 | 0.000864348 | 0.029660275      | -0.809677637 |
| U1GALT1   | -0.224360468    | 5.544368065        | -3.466563983 | 0.000866386 | 0.029661906      | -0.80869787  |
| CSP31     | -0.203218013    | 2.433152368        | -3.463934386 | 0.000873734 | 0.029693664      | -0.701546083 |
| DTWD2     | -0.394545503    | 1.27694599         | -3.465312675 | 0.000869875 | 0.029693664      | -0.723909095 |
| MIS12     | -0.168338262    | 3.776767353        | -3.464521498 | 0.000872088 | 0.029693664      | -0.750288254 |
| ZNF580    | 0.260485765     | 4.463951641        | 3.462669126  | 0.00087729  | 0.029693664      | -0.783492419 |
| SMARCA4   | 0.094322568     | 6.6391332          | 3.46246802   | 0.000877857 | 0.029693664      | -0.831842393 |
| ADRM1     | 0.197119232     | 5.999633909        | 3.462012803  | 0.000879141 | 0.029693664      | -0.833035606 |
| SOBP      | 0.245897217     | 3.895379749        | 3.461293787  | 0.000881172 | 0.029695687      | -0.774850291 |
| FUT11     | -0.166741236    | 4.945652816        | -3.457266392 | 0.000892631 | 0.029907223      | -0.828584475 |
| NR3C1     | -0.229405031    | 7.480725544        | -3.456063584 | 0.000896081 | 0.029907223      | -0.839765208 |
| WSB2      | -0.185831007    | 5.702922819        | -3.457789965 | 0.000891134 | 0.029907223      | -0.840918484 |
| TMED5     | -0.206058053    | 5.854946392        | -3.456281951 | 0.000895454 | 0.029907223      | -0.848495385 |
| EEF1D     | 0.176417868     | 6.371070631        | 3.455613336  | 0.000897376 | 0.029907223      | -0.85323037  |
| CCSER2    | -0.170654134    | 5.722479411        | -3.45174387  | 0.000908574 | 0.030213599      | -0.859136323 |
| MOB4      | -0.159322178    | 4.220203624        | -3.449383833 | 0.000915469 | 0.030366828      | -0.811385905 |
| SESN2     | 0.395637511     | 5.719769829        | 3.448789308  | 0.000917214 | 0.030366828      | -0.856950824 |
| NR2F6     | 0.187641415     | 4.563286301        | 3.446563874  | 0.000923772 | 0.030450123      | -0.840657661 |
| SDHA      | 0.09748891      | 6.127631499        | 3.446580209  | 0.000923724 | 0.030450123      | -0.878516498 |
| LSM14A    | -0.085545987    | 6.600632423        | -3.44531542  | 0.000927471 | 0.030505292      | -0.882810069 |
| CST3      | 0.207252523     | 8.492572375        | 3.441697054  | 0.00093827  | 0.03079325       | -0.857525974 |
| NAPA      | 0.127624891     | 6.13400156         | 3.438646825  | 0.000947466 | 0.031027446      | -0.901684335 |
| PAXIP1    | -0.221323028    | 2.953098513        | -3.436654408 | 0.000953518 | 0.031090477      | -0.798847337 |
| VAPA      | -0.083433267    | 6.910609197        | -3.436804727 | 0.00095306  | 0.031090477      | -0.904670118 |
| LARP1     | -0.184371843    | 7.448734189        | -3.433814581 | 0.000962208 | 0.031306057      | -0.900518069 |
| ZBTB1     | -0.191035651    | 5.146071725        | -3.432617911 | 0.000965892 | 0.031358195      | -0.895698196 |
| NDUFV3    | 0.166476059     | 4.988188979        | 3.431045358  | 0.000970754 | 0.031448255      | -0.898008171 |
| SLC7A11   | -0.356300419    | 4.790378446        | -3.429215437 | 0.00097644  | 0.031564588      | -0.900358897 |
| BCL2      | -0.271111198    | 3.944966011        | -3.428370388 | 0.000979077 | 0.031582045      | -0.856432789 |
| TIGAR     | 0.207591033     | 4.312602112        | 3.427014323  | 0.000983322 | 0.031643358      | -0.865521297 |
| ZADH2     | -0.161042202    | 4.528999418        | -3.426422845 | 0.000985179 | 0.031643358      | -0.907272198 |
| AASDHPPT  | -0.099331932    | 4.728699671        | -3.424700901 | 0.000990604 | 0.031682498      | -0.912264198 |
| HSF1      | 0.150412469     | 6.387354282        | 3.425110911  | 0.00098931  | 0.031682498      | -0.941688975 |
| IQSEC2    | 0.142677209     | 3.699378763        | 3.419694004  | 0.001006539 | 0.031807415      | -0.867385474 |
| SLC43A2   | 0.230551923     | 4.160040614        | 3.419942449  | 0.001005742 | 0.031807415      | -0.902691227 |
| HNRNPUL1  | 0.076738312     | 8.256637085        | 3.420724142  | 0.001003241 | 0.031807415      | -0.921474945 |
| MT2A      | 0.248209618     | 7.278274126        | 3.420113226  | 0.001005195 | 0.031807415      | -0.947049203 |
| ATG12     | -0.104154667    | 5.833501327        | -3.419494546 | 0.001007179 | 0.031807415      | -0.953873386 |
| SYDE2     | -0.446272152    | 0.822354332        | -3.422408464 | 0.00099787  | 0.031807415      | -0.954788719 |
| SCRIB     | 0.117085301     | 5.840180126        | 3.417176578  | 0.001014642 | 0.031909318      | -0.958199111 |
| ANKRD28   | -0.208111332    | 6.333690819        | -3.417750301 | 0.00101279  | 0.031909318      | -0.962783304 |
| MIR137HG  | -0.350063037    | 0.657027117        | -3.415035493 | 0.001021582 | 0.032060643      | -0.9197988   |
| CHML      | -0.265696437    | 3.373068988        | -3.414021162 | 0.001024885 | 0.032097446      | -0.875675513 |
| JARID2    | -0.251359992    | 3.250508947        | -3.411223284 | 0.00103405  | 0.032312925      | -0.881970465 |
| FAM180A   | -0.238713076    | 5.276057543        | -3.410613958 | 0.001036056 | 0.032312925      | -0.958214693 |
| GRIN2D    | 0.225279984     | 3.994546724        | 3.409099996  | 0.001041056 | 0.032319382      | -0.915102137 |
| NOC2L     | 0.122009782     | 5.55895829         | 3.408603967  | 0.001042699 | 0.032319382      | -0.981364732 |
| LINC00704 | -1.227306787    | -3.506058157       | -3.409561332 | 0.00103953  | 0.032319382      | -2.223889354 |
| KRCC1     | 0.191231614     | 4.695084235        | 3.405791032  | 0.001052064 | 0.032417482      | -0.961853703 |
| REPIN1    | 0.107498587     | 5.134372614        | 3.40571447   | 0.00105232  | 0.032417482      | -0.978515985 |
| SRGAP1    | -0.3039384      | 6.088752548        | -3.406252287 | 0.001050523 | 0.032417482      | -0.995921761 |

| Gene     | Log fold change | Average Expression | t            | P-value     | Adjusted P-value | B            |
|----------|-----------------|--------------------|--------------|-------------|------------------|--------------|
| LDLRAP1  | 0.144265179     | 4.813476688        | 3.404377188  | 0.001056801 | 0.032489079      | -0.965979657 |
| AEN      | 0.279893016     | 4.984272254        | 3.400549773  | 0.001069725 | 0.032686291      | -0.964734853 |
| SSH3     | 0.151333004     | 4.657992923        | 3.401003183  | 0.001068186 | 0.032686291      | -0.96916844  |
| THOC2    | -0.216677098    | 5.051311387        | -3.400558591 | 0.001069695 | 0.032686291      | -0.988516455 |
| ARFGAP3  | -0.255012725    | 5.557324152        | -3.397976313 | 0.001078499 | 0.032887669      | -1.015923526 |
| GTF2F1   | 0.125635454     | 7.076808228        | 3.39675898   | 0.001082673 | 0.032948249      | -1.018244962 |
| USP16    | -0.132248844    | 5.647831324        | -3.391856791 | 0.001099636 | 0.033396996      | -1.031619941 |
| CDK16    | 0.087212562     | 6.650804306        | 3.389719367  | 0.00110711  | 0.033556339      | -1.042994678 |
| LSM11    | -0.279140795    | 2.549601979        | -3.387649828 | 0.001114392 | 0.033574405      | -0.922612736 |
| GOPC     | -0.175624162    | 5.188147742        | -3.388145596 | 0.001112643 | 0.033574405      | -1.026310232 |
| ABCF3    | 0.10804285      | 5.711367533        | 3.388431889  | 0.001111635 | 0.033574405      | -1.043394469 |
| ZNF414   | 0.255210049     | 3.271756761        | 3.383285078  | 0.001129899 | 0.033973658      | -0.946819878 |
| NAT10    | 0.114498884     | 5.644662629        | 3.381145366  | 0.001137575 | 0.034136325      | -1.064390081 |
| TMEM160  | 0.385279832     | 1.813599221        | 3.379031946  | 0.001145205 | 0.034296965      | -0.93217762  |
| UBA1     | 0.102017569     | 8.558920749        | 3.377883069  | 0.001149373 | 0.034353491      | -1.034554164 |
| DYRK2    | -0.162804942    | 5.512439508        | -3.375432835 | 0.00115831  | 0.034552049      | -1.076002851 |
| DUSP3    | -0.126881295    | 6.272464369        | -3.372330759 | 0.001169718 | 0.034823398      | -1.09312359  |
| PRKCSH   | 0.130604783     | 9.039245585        | 3.371692057  | 0.001172081 | 0.034824893      | -1.039605085 |
| CYB561   | 0.109129542     | 5.571384957        | 3.370083307  | 0.00117805  | 0.034933352      | -1.092618053 |
| PARP12   | 0.18167509      | 3.028443045        | 3.366265588  | 0.00119233  | 0.034960111      | -0.984336755 |
| CMTM7    | 0.227378011     | 3.297640628        | 3.365881035  | 0.001193778 | 0.034960111      | -0.998022364 |
| RPL13    | 0.198726635     | 9.914367865        | 3.366714395  | 0.001190643 | 0.034960111      | -1.028839657 |
| AAAS     | 0.16829222      | 4.750213602        | 3.367918683  | 0.001186127 | 0.034960111      | -1.066124119 |
| SAMD8    | -0.222563773    | 4.744776342        | -3.36749204  | 0.001187725 | 0.034960111      | -1.066497376 |
| TRAF7    | 0.099928325     | 7.24958236         | 3.367167269  | 0.001188943 | 0.034960111      | -1.100266123 |
| TCF12    | -0.223016789    | 6.687911214        | -3.365504276 | 0.001195198 | 0.034960111      | -1.111898848 |
| ZNF33B   | -0.179978185    | 2.62799406         | -3.361450994 | 0.001210573 | 0.035028715      | -0.979011164 |
| TUBB     | 0.117229823     | 9.807866447        | 3.361209341  | 0.001211495 | 0.035028715      | -1.043842349 |
| TRAPPC6B | -0.1421769168   | 4.345233114        | -3.36293628  | 0.001204917 | 0.035028715      | -1.057924207 |
| GNAI2    | 0.143996022     | 8.617416378        | 3.362116148  | 0.001208037 | 0.035028715      | -1.079178163 |
| PPP2R1A  | 0.114602285     | 8.146183873        | 3.362388771  | 0.001206999 | 0.035028715      | -1.090401255 |
| ARHGAP1  | 0.11244736      | 7.889616429        | 3.361579678  | 0.001210082 | 0.035028715      | -1.099594682 |
| NUCB1    | 0.118766391     | 9.170904291        | 3.358597436  | 0.001221508 | 0.035250571      | -1.072295253 |
| HOMER1   | -0.338722194    | 2.313763299        | -3.356654327 | 0.001229008 | 0.035346397      | -0.999887935 |
| UBTD2    | -0.127260662    | 6.235896702        | -3.356521627 | 0.001229522 | 0.035346397      | -1.138396145 |
| BCKDK    | 0.146580296     | 5.512009376        | 3.354985528  | 0.001235483 | 0.035450134      | -1.130965837 |
| MED19    | 0.176642954     | 3.80663775         | 3.353507255  | 0.001241246 | 0.035480332      | -1.062710487 |
| FAM160B2 | 0.08357867      | 5.935836743        | 3.354087434  | 0.001238981 | 0.035480332      | -1.141254409 |
| KIT      | -0.673830843    | 3.397774175        | -3.352502303 | 0.001245179 | 0.035525322      | -1.013612641 |
| SYN1     | 0.369920227     | 0.138262675        | 3.351695606  | 0.001248344 | 0.035548293      | -1.140974765 |
| BRMS1L   | -0.125402824    | 3.461705376        | -3.348540923 | 0.001260793 | 0.03577258       | -1.059351786 |
| PRKAG2   | -0.168530142    | 3.425174674        | -3.348496591 | 0.001260969 | 0.03577258       | -1.063394519 |
| KAT2B    | -0.211842747    | 4.178412729        | -3.347710213 | 0.001264091 | 0.035793739      | -1.095833704 |
| MAP4K3   | -0.240631458    | 4.112261692        | -3.346745046 | 0.001267933 | 0.035835161      | -1.101934002 |
| NME2     | 0.220731726     | 4.256950776        | 3.3443204    | 0.001277632 | 0.035854331      | -1.108590479 |
| STAM2    | -0.189595944    | 4.997047517        | -3.34544267  | 0.001273134 | 0.035854331      | -1.142210545 |
| G6PD     | 0.1831213       | 7.225634283        | 3.344196062  | 0.001278132 | 0.035854331      | -1.165433642 |
| LIMS1    | -0.17406281     | 6.51713682         | -3.344471554 | 0.001277026 | 0.035854331      | -1.171056345 |
| KIF1C    | 0.119046679     | 7.700806025        | 3.34320084   | 0.001282135 | 0.035899769      | -1.157117747 |
| EFNA4    | 0.194956443     | 1.957626822        | 3.341346308  | 0.001289625 | 0.035907729      | -1.031312162 |
| GFER     | 0.200304627     | 3.237679104        | 3.339106742  | 0.001298726 | 0.035907729      | -1.072422418 |
| DCUN1D1  | -0.155759649    | 4.313576664        | -3.337846933 | 0.001303872 | 0.035907729      | -1.133648822 |
| DST      | -0.280954623    | 7.942679674        | -3.341891725 | 0.001287418 | 0.035907729      | -1.154895173 |
| EXOC6B   | -0.19109544     | 5.194681598        | -3.340083627 | 0.001294749 | 0.035907729      | -1.168344721 |
| PPDPF    | 0.276939813     | 7.479238945        | 3.339871823  | 0.00129561  | 0.035907729      | -1.174816007 |
| ZMIZ2    | 0.115814512     | 5.812745499        | 3.339892813  | 0.001295525 | 0.035907729      | -1.18004141  |
| MOB1A    | -0.149419019    | 6.916802211        | -3.338231709 | 0.001302298 | 0.035907729      | -1.185914521 |
| LCTL     | -0.99744792     | -3.015420429       | -3.338004348 | 0.001303228 | 0.035907729      | -2.119382683 |
| ZNF771   | 0.234002479     | 3.258897348        | 3.330843858  | 0.001332829 | 0.036384214      | -1.095475988 |
| MPV17L2  | 0.171880707     | 3.168823823        | 3.33160136   | 0.001329668 | 0.036384214      | -1.103214007 |
| ACOT2    | 0.145452113     | 3.497236462        | 3.330515383  | 0.001334202 | 0.036384214      | -1.114699836 |
| BTBD2    | 0.190339129     | 7.752510379        | 3.331148917  | 0.001331555 | 0.036384214      | -1.192814522 |
| EHD4     | -0.191977059    | 5.474408355        | -3.331458949 | 0.001330261 | 0.036384214      | -1.19931915  |
| PYHIN1   | 1.154908686     | -3.438538938       | 3.330165458  | 0.001335666 | 0.036384214      | -2.38310836  |
| RTP4     | 0.27735815      | 1.140072407        | 3.327720583  | 0.001345937 | 0.036531891      | -1.079176557 |
| C20orf27 | 0.184478064     | 5.668260833        | 3.327902967  | 0.001345169 | 0.036531891      | -1.211625434 |
| CDCA4    | -0.148719665    | 3.00130011         | -3.322807824 | 0.001366802 | 0.036679681      | -1.110569675 |
| LIMD1    | -0.249726443    | 3.674017102        | -3.324871282 | 0.001358002 | 0.036679681      | -1.165064041 |
| CARD6    | 0.183501306     | 4.86330035         | 3.323016648  | 0.001365909 | 0.036679681      | -1.204041579 |
| FNDC3B   | -0.286045956    | 7.321398866        | -3.325047705 | 0.001357252 | 0.036679681      | -1.212706598 |



| Gene     | Log fold change | Average Expression | t            | P-value     | Adjusted P-value | B            |
|----------|-----------------|--------------------|--------------|-------------|------------------|--------------|
| SHOC2    | -0.152108145    | 6.195389656        | -3.323399216 | 0.001364274 | 0.036679681      | -1.229713343 |
| HDGFRP2  | 0.199959874     | 6.318456763        | 3.324034632  | 0.001361563 | 0.036679681      | -1.230081364 |
| ARPP19   | -0.137260382    | 6.069482637        | -3.322428195 | 0.001368427 | 0.036679681      | -1.234049252 |
| RXRB     | 0.137754869     | 4.913670393        | 3.320497235  | 0.00137672  | 0.036836425      | -1.210441726 |
| FMNL1    | 0.213760827     | 3.488331792        | 3.318926576  | 0.0013835   | 0.036886811      | -1.136559388 |
| RAD1     | -0.157218541    | 4.710254585        | -3.319007627 | 0.00138315  | 0.036886811      | -1.201356696 |
| SEC13    | 0.137162878     | 7.107981143        | 3.318081976  | 0.001387159 | 0.036919026      | -1.24057366  |
| CNPPD1   | 0.145913139     | 5.611593759        | 3.317018068  | 0.001391781 | 0.036976713      | -1.240645567 |
| FMR1     | -0.171279567    | 4.346495581        | -3.316372534 | 0.001394593 | 0.036986179      | -1.202474986 |
| EIF5A2   | -0.215719897    | 3.784739633        | -3.315726961 | 0.00139741  | 0.036995757      | -1.148752197 |
| HGH1     | 0.150098359     | 4.649972896        | 3.313875178  | 0.00140552  | 0.037145192      | -1.223326493 |
| YPEL2    | -0.238986113    | 2.984925397        | -3.308595941 | 0.001428886 | 0.037695349      | -1.168715249 |
| ZC3H4    | 0.160530868     | 4.74804751         | 3.30804558   | 0.001431342 | 0.037695349      | -1.241858152 |
| KDELRL1  | 0.13339378      | 8.391929352        | 3.307224794  | 0.001435013 | 0.037726079      | -1.240531042 |
| SPATA2   | 0.149397931     | 4.163039709        | 3.306209867  | 0.001439565 | 0.037741235      | -1.218012687 |
| AMD1     | -0.244101583    | 5.714381529        | -3.305979408 | 0.001440601 | 0.037741235      | -1.278449619 |
| DOCK11   | -0.194329512    | 5.139383708        | -3.30495146  | 0.001445228 | 0.037796725      | -1.263013408 |
| COG7     | 0.15330303      | 3.509966312        | 3.301684392  | 0.001460027 | 0.038117588      | -1.173451256 |
| SLC9A3R1 | 0.147594118     | 3.912537081        | 3.299860619  | 0.00146835  | 0.038245542      | -1.218986076 |
| IRAK4    | -0.118493443    | 4.095342833        | -3.299498988 | 0.001470006 | 0.038245542      | -1.226112263 |
| TBC1D12  | -0.236770324    | 3.43117724         | -3.296651039 | 0.001483106 | 0.038513914      | -1.205294926 |
| BLOC1S6  | -0.08898682     | 6.245480963        | -3.296147342 | 0.001485434 | 0.038513914      | -1.308487338 |
| PCGF2    | 0.169315023     | 5.680560689        | 3.293341563  | 0.001498467 | 0.038785064      | -1.308783625 |
| PIP5K1C  | 0.117305307     | 7.316712773        | 3.292305718  | 0.001503306 | 0.038843559      | -1.308891396 |
| FAM111A  | -0.203126334    | 4.714747735        | -3.290888673 | 0.001509948 | 0.038902084      | -1.277404126 |
| USP25    | -0.096583105    | 5.541046678        | -3.290721171 | 0.001510735 | 0.038902084      | -1.314973793 |
| NEK11    | -0.154888879    | 3.942748173        | -3.288319064 | 0.001522065 | 0.039126933      | -1.2480261   |
| STC1     | -0.343544231    | 3.542155622        | -3.287317446 | 0.001526812 | 0.039182112      | -1.220217839 |
| C5orf24  | -0.215100335    | 5.657242905        | -3.284867496 | 0.001538483 | 0.039414479      | -1.335870552 |
| ZCCHC17  | 0.152959109     | 4.470208016        | 3.283261393  | 0.00154618  | 0.039477381      | -1.29112155  |
| EIF5     | -0.241123864    | 7.200811647        | -3.283614548 | 0.001544485 | 0.039477381      | -1.329637763 |
| NAT6     | 0.231201348     | 2.422255849        | 3.281696106  | 0.001553716 | 0.039535766      | -1.19238644  |
| IRF2BP1  | 0.174183684     | 4.986963867        | 3.281909414  | 0.001552687 | 0.039535766      | -1.320444793 |
| STK11    | 0.132619967     | 5.810760581        | 3.280029901  | 0.001561775 | 0.039673831      | -1.347553601 |
| TAF3     | 0.144871748     | 4.130986198        | 3.276825619  | 0.001577385 | 0.03968439       | -1.289625888 |
| CLN6     | 0.146880216     | 4.342114266        | 3.278514501  | 0.001569139 | 0.03968439       | -1.304933136 |
| XPOT     | -0.14193751     | 7.676060488        | -3.278098339 | 0.001571167 | 0.03968439       | -1.340807351 |
| IER5     | 0.221257494     | 6.031800192        | 3.276700527  | 0.001577997 | 0.03968439       | -1.346655476 |
| MAX      | 0.074806077     | 5.949285316        | 3.278038818  | 0.001571458 | 0.03968439       | -1.357316635 |
| PELP1    | 0.133215071     | 5.941454846        | 3.277150285  | 0.001575797 | 0.03968439       | -1.360021674 |
| UBASH3B  | -0.307432924    | 3.413826286        | -3.274809458 | 0.001587282 | 0.039851348      | -1.281244606 |
| TGFBFR1  | -0.346577391    | 6.723783455        | -3.274179157 | 0.001590387 | 0.039857672      | -1.366142515 |
| ARAF     | 0.114494063     | 5.751858913        | 3.273685244  | 0.001592825 | 0.039857672      | -1.366166058 |
| PARP16   | 0.172614515     | 2.694356881        | 3.271708739  | 0.001602616 | 0.040028063      | -1.23037535  |
| TRIP10   | 0.168449603     | 5.785428556        | 3.271239386  | 0.001604949 | 0.040028063      | -1.372800924 |
| SHISA5   | 0.118408216     | 7.972097666        | 3.267025281  | 0.001626041 | 0.040143431      | -1.364732373 |
| GTF3C5   | 0.137060607     | 5.239322757        | 3.267893603  | 0.001621674 | 0.040143431      | -1.366388909 |
| UBA3     | -0.098071671    | 5.229684686        | -3.266892942 | 0.001626707 | 0.040143431      | -1.371121289 |
| STX6     | -0.131672582    | 5.570593247        | -3.268542792 | 0.001618416 | 0.040143431      | -1.375131148 |
| ACAP2    | -0.202696141    | 5.786501239        | -3.268856283 | 0.001616845 | 0.040143431      | -1.381430194 |
| ASAP3    | 0.12646411      | 6.725121096        | 3.267365537  | 0.001624328 | 0.040143431      | -1.389172675 |
| SF3A2    | 0.240555267     | 6.511873964        | 3.266591114  | 0.001628229 | 0.040143431      | -1.391363817 |
| PDP2     | -0.368286053    | 3.563233644        | -3.264973746 | 0.001636403 | 0.040234011      | -1.305470371 |
| FAM214B  | -0.176446326    | 4.182907705        | -3.264281119 | 0.001639915 | 0.040234011      | -1.347710781 |
| RASEF    | -0.565178875    | -0.655050916       | -3.264479314 | 0.001638909 | 0.040234011      | -1.52740906  |
| NCDN     | 0.094862982     | 5.939578353        | 3.261233473  | 0.001655454 | 0.040549203      | -1.403240603 |
| ATP6AP1  | 0.104054614     | 6.981062297        | 3.259935307  | 0.001662115 | 0.040646261      | -1.406165809 |
| MXRA8    | 0.167210339     | 9.374462451        | 3.258645089  | 0.00166876  | 0.040742618      | -1.345141328 |
| SDF2L1   | 0.200688098     | 3.443700475        | 3.256905939  | 0.001677756 | 0.040895981      | -1.308282158 |
| NAA25    | -0.273523309    | 3.741589155        | -3.255769388 | 0.00168366  | 0.040954776      | -1.357288984 |
| AGFG1    | -0.188052865    | 5.999771392        | -3.255395632 | 0.001685605 | 0.040954776      | -1.422235646 |
| PABPC4   | 0.144555448     | 8.668545728        | 3.251054277  | 0.001708361 | 0.041440819      | -1.387934351 |
| ATP6V1B2 | -0.241538413    | 7.147421766        | -3.249502828 | 0.001716563 | 0.041543952      | -1.429545357 |
| YES1     | -0.196243316    | 6.139752248        | -3.248687792 | 0.001720886 | 0.041543952      | -1.441270059 |
| FSIP1    | -0.401055975    | 0.233365003        | -3.248939315 | 0.001719551 | 0.041543952      | -1.44749516  |
| PHF21A   | 0.168138067     | 5.12586995         | 3.247864174  | 0.001725265 | 0.041583033      | -1.421122111 |
| ZNRF1    | 0.152605094     | 4.04494041         | 3.246956093  | 0.001730106 | 0.041633089      | -1.37686411  |
| RAB7B    | 0.23035193      | 3.951820994        | 3.246294443  | 0.001733641 | 0.041651617      | -1.374037331 |
| VPS33B   | 0.145774213     | 3.279246016        | 3.243095103  | 0.001750829 | 0.04193083       | -1.344363132 |
| PRKCD    | 0.164638936     | 3.383479729        | 3.243538861  | 0.001748436 | 0.04193083       | -1.361007089 |

| Gene         | Log fold change | Average Expression | t            | P-value     | Adjusted P-value | B            |
|--------------|-----------------|--------------------|--------------|-------------|------------------|--------------|
| ZNRF2        | -0.20777559     | 2.612814509        | -3.241438668 | 0.001759791 | 0.042011876      | -1.304447839 |
| SCYL1        | 0.12072717      | 6.840004899        | 3.241911026  | 0.001757231 | 0.042011876      | -1.456149566 |
| MGRN1        | 0.087971949     | 6.273007404        | 3.240063332  | 0.001767265 | 0.04212354       | -1.465103175 |
| CYTH1        | -0.171267441    | 3.982642941        | -3.238890275 | 0.001773663 | 0.042209252      | -1.398375187 |
| RBM6         | -0.160025936    | 5.107470628        | -3.237673171 | 0.001780324 | 0.042245308      | -1.438633062 |
| SMARCD2      | 0.08708772      | 5.813709675        | 3.237588782  | 0.001780787 | 0.042245308      | -1.467653938 |
| LOC100132215 | 0.831302401     | -1.939247579       | 3.236879582  | 0.00178468  | 0.042271097      | -1.952626504 |
| GMIP         | 0.1824205       | 2.603977769        | 3.234386603  | 0.001798429 | 0.042446998      | -1.330742707 |
| CEP131       | 0.275945505     | 3.092239795        | 3.233072304  | 0.001805717 | 0.042446998      | -1.334306453 |
| PPARGC1B     | -0.532472597    | -0.028967557       | -3.223499284 | 0.001859643 | 0.042446998      | -1.334622208 |
| SH3BP1       | 0.226072909     | 2.185738166        | 3.230490983  | 0.001820112 | 0.042446998      | -1.33991139  |
| POLA2        | 0.176799798     | 3.397014172        | 3.233363741  | 0.001804098 | 0.042446998      | -1.368537556 |
| TARS2        | 0.217450642     | 3.502339906        | 3.225208703  | 0.001849904 | 0.042446998      | -1.383863307 |
| DZIP3        | -0.228172606    | 3.499124157        | -3.226353498 | 0.001843409 | 0.042446998      | -1.388693609 |
| LRSAM1       | 0.149662718     | 4.307206016        | 3.229321366  | 0.001826669 | 0.042446998      | -1.420076946 |
| EDEM1        | -0.233189349    | 4.499252887        | -3.229959058 | 0.001823091 | 0.042446998      | -1.449198736 |
| MAFG         | -0.16095839     | 5.073227565        | -3.229825106 | 0.001823842 | 0.042446998      | -1.453680338 |
| MAD2L2       | 0.20781123      | 4.65037539         | 3.224433897  | 0.001854312 | 0.042446998      | -1.462882202 |
| TRAFD1       | 0.105429064     | 4.982243166        | 3.229011898  | 0.001828408 | 0.042446998      | -1.468083839 |
| ADA          | 0.26885043      | 4.774683029        | 3.223393161  | 0.001860249 | 0.042446998      | -1.470763535 |
| RAB11FIP2    | -0.220383565    | 4.861563552        | -3.225417151 | 0.00184872  | 0.042446998      | -1.471461131 |
| SNAP47       | 0.095599053     | 4.86463363         | 3.223434033  | 0.001860016 | 0.042446998      | -1.475849844 |
| GNA13        | -0.262594275    | 5.840941588        | -3.234583589 | 0.001797339 | 0.042446998      | -1.479146119 |
| MFSD5        | 0.097069549     | 6.030987389        | 3.232039482  | 0.001811463 | 0.042446998      | -1.487217071 |
| LMF2         | 0.151368622     | 6.882325409        | 3.23097191   | 0.001817422 | 0.042446998      | -1.488249554 |
| GNL3         | -0.183463491    | 5.852258361        | -3.230535173 | 0.001819864 | 0.042446998      | -1.490536473 |
| KARS         | 0.134076981     | 7.080145036        | 3.226533862  | 0.001842388 | 0.042446998      | -1.496504029 |
| TTC17        | -0.176835815    | 5.724350638        | -3.222990482 | 0.001862551 | 0.042446998      | -1.504419547 |
| NR1H2        | 0.155082448     | 6.305181585        | 3.225516768  | 0.001848154 | 0.042446998      | -1.504844184 |
| WFS1         | 0.137815212     | 6.041887148        | 3.224052895  | 0.001856484 | 0.042446998      | -1.508468974 |
| ATP13A1      | 0.108952219     | 6.022900255        | 3.223754172  | 0.001858188 | 0.042446998      | -1.508623601 |
| ACSS2        | 0.200821757     | 6.101399312        | 3.223009758  | 0.001862441 | 0.042446998      | -1.510812563 |
| MDH2         | 0.097737998     | 7.233953266        | 3.221897702  | 0.001868811 | 0.042525326      | -1.506477805 |
| SLC16A7      | -0.361200485    | 5.038564364        | -3.220607493 | 0.001876227 | 0.04262969       | -1.489819882 |
| RAI14        | -0.21501422     | 6.442750697        | -3.219229417 | 0.001884179 | 0.042745889      | -1.521245511 |
| EMD          | 0.176564332     | 5.839487486        | 3.217289144  | 0.001895428 | 0.042936436      | -1.523191696 |
| JAK2         | -0.232807556    | 3.950715641        | -3.213657297 | 0.001916654 | 0.042953677      | -1.469083717 |
| FOS          | 0.996011129     | 5.295860894        | 3.212874105  | 0.00192126  | 0.042953677      | -1.503176731 |
| BCOR         | -0.341568133    | 4.543805943        | -3.214410224 | 0.001912235 | 0.042953677      | -1.508754588 |
| PCIF1        | 0.118918359     | 5.111952748        | 3.215645812  | 0.001905005 | 0.042953677      | -1.509200535 |
| HSPBP1       | 0.196997226     | 5.067467851        | 3.214489607  | 0.00191177  | 0.042953677      | -1.509355033 |
| SLC27A4      | 0.12513797      | 5.433798151        | 3.215261915  | 0.001907249 | 0.042953677      | -1.522231832 |
| C19orf43     | 0.201482048     | 6.947133289        | 3.214599535  | 0.001911126 | 0.042953677      | -1.532737936 |
| PSMD3        | 0.138372134     | 6.717412405        | 3.21277365   | 0.001921852 | 0.042953677      | -1.539104534 |
| RRAD         | 0.596579749     | -0.756764208       | 3.213240921  | 0.001919102 | 0.042953677      | -1.819158575 |
| HSPB1        | 0.267175273     | 7.853606312        | 3.209652429  | 0.001940318 | 0.043302148      | -1.527926757 |
| ASXL1        | -0.199632662    | 6.03118855         | -3.208133274 | 0.001949366 | 0.04343971       | -1.550802087 |
| LOC100288846 | 0.771537301     | -2.693934158       | 3.205798749  | 0.001963346 | 0.043686634      | -2.135772941 |
| EIF3B        | 0.091367551     | 7.872466218        | 3.205208006  | 0.001966899 | 0.04369266       | -1.532200305 |
| EPN1         | 0.168777489     | 7.833219788        | 3.204789721  | 0.001969418 | 0.04369266       | -1.541029834 |
| RILP         | 0.257778227     | 3.234898733        | 3.203195154  | 0.001979049 | 0.043841763      | -1.439210135 |
| CSRP1        | 0.149450737     | 7.230610016        | 3.200698177  | 0.001994219 | 0.044112955      | -1.562715772 |
| CTXN1        | 0.294842462     | 2.837676887        | 3.199537098  | 0.002001311 | 0.0442049        | -1.426992985 |
| GCLM         | -0.23684171     | 5.13316337         | -3.197105993 | 0.002016234 | 0.044404321      | -1.569372304 |
| MAP4K5       | -0.148757573    | 5.920165537        | -3.197490871 | 0.002013865 | 0.044404321      | -1.579773195 |
| TMEM253      | 0.614027066     | -2.232035075       | 3.194946023  | 0.002029581 | 0.04463301       | -2.045774717 |
| ZNF281       | -0.228324399    | 5.148538314        | -3.193829527 | 0.002036513 | 0.044633972      | -1.561512359 |
| RAB11B       | 0.169381005     | 6.45008476         | 3.193835449  | 0.002036476 | 0.044633972      | -1.592597853 |
| PPM1E        | -0.788085819    | -2.028168137       | -3.193507824 | 0.002038514 | 0.044633972      | -2.03715069  |
| WIPF1        | -0.163935628    | 6.825158531        | -3.191534334 | 0.002050831 | 0.044838489      | -1.597747748 |
| E2F4         | 0.101167968     | 5.783921943        | 3.190840808  | 0.002055176 | 0.044868366      | -1.598301968 |
| C17orf53     | 0.249994594     | 1.180980984        | 3.189858014  | 0.002061348 | 0.044873047      | -1.419804154 |
| XRCC6        | 0.07948971      | 8.083173543        | 3.1902856    | 0.002058661 | 0.044873047      | -1.570500813 |
| KIAA1958     | -0.283683497    | 2.569847404        | -3.188828848 | 0.00206783  | 0.044884426      | -1.441708549 |
| ARNT2        | -0.266436981    | 4.590755291        | -3.188851387 | 0.002067688 | 0.044884426      | -1.564609813 |
| PSMC4        | 0.148408795     | 5.951134861        | 3.188150484  | 0.002072113 | 0.044912675      | -1.605444155 |
| ABCB6        | 0.339448729     | 0.952966416        | 3.187460084  | 0.00207648  | 0.044940909      | -1.463807104 |
| PCMTD2       | -0.178361285    | 4.41777094         | -3.18688982  | 0.002080094 | 0.044940909      | -1.555784053 |
| SENP6        | -0.118797232    | 5.745022251        | -3.186531881 | 0.002082366 | 0.044940909      | -1.608866049 |
| C2CD2        | -0.194231218    | 4.662901941        | -3.184828411 | 0.002093207 | 0.045045815      | -1.581166367 |

| Gene      | Log fold change | Average Expression | t            | P-value     | Adjusted P-value | B            |
|-----------|-----------------|--------------------|--------------|-------------|------------------|--------------|
| TALDO1    | 0.142305938     | 6.876372072        | 3.185079033  | 0.002091609 | 0.045045815      | -1.613865775 |
| PDE12     | -0.189777838    | 4.810012686        | -3.183275799 | 0.002103134 | 0.045194886      | -1.588806825 |
| THEMIS2   | 0.229615733     | 2.038766014        | 3.182499935  | 0.002108112 | 0.04519996       | -1.448664365 |
| PPP1R16A  | 0.205147628     | 3.403161881        | 3.182306427  | 0.002109355 | 0.04519996       | -1.504599536 |
| GALK1     | 0.224551337     | 4.584795212        | 3.180530605  | 0.002120795 | 0.045279892      | -1.574263802 |
| BOP1      | 0.189010486     | 5.170160483        | 3.178007508  | 0.002137148 | 0.045279892      | -1.618838154 |
| TBC1D13   | 0.098356789     | 5.61479244         | 3.179430003  | 0.002127914 | 0.045279892      | -1.624674542 |
| YIF1A     | 0.176794637     | 5.928268544        | 3.180478535  | 0.002121131 | 0.045279892      | -1.62502126  |
| PRKAA1    | -0.272244296    | 5.663321824        | -3.179618457 | 0.002126693 | 0.045279892      | -1.626652671 |
| SH3D19    | -0.112010418    | 7.199078096        | -3.17877284  | 0.002132175 | 0.045279892      | -1.629113558 |
| WDR46     | 0.107066324     | 5.745658002        | 3.178482404  | 0.002134061 | 0.045279892      | -1.630610504 |
| ADAM15    | 0.124603711     | 6.794138426        | 3.178181335  | 0.002136018 | 0.045279892      | -1.633408664 |
| TAF6L     | 0.192000931     | 3.110490782        | 3.176785317  | 0.002145112 | 0.045384796      | -1.49797544  |
| C8orf82   | 0.188500786     | 4.34838493         | 3.17524605   | 0.002155182 | 0.045533891      | -1.581634049 |
| EOGT      | -0.22350937     | 4.095278724        | -3.174087839 | 0.002162788 | 0.045548393      | -1.586536827 |
| LZTFL1    | -0.100883583    | 4.597979618        | -3.174289292 | 0.002161463 | 0.045548393      | -1.599652371 |
| ATP13A3   | -0.464364115    | 6.929385497        | -3.173760932 | 0.00216494  | 0.045548393      | -1.628938255 |
| DPM2      | 0.1804949       | 4.71933195         | 3.172617633  | 0.002172479 | 0.045605426      | -1.609400274 |
| RCBTB1    | -0.140241208    | 4.786217446        | -3.17243207  | 0.002173705 | 0.045605426      | -1.614674994 |
| NANS      | 0.152377715     | 5.030189328        | 3.170845147  | 0.002184217 | 0.045698667      | -1.632441884 |
| ACTA2     | 0.14607822      | 6.35846942         | 3.171032092  | 0.002182976 | 0.045698667      | -1.654543687 |
| PRR16     | -0.126062045    | 4.47269225         | -3.16930588  | 0.002194458 | 0.045849254      | -1.613579477 |
| FDFT1     | 0.158618171     | 7.369933844        | 3.168425117  | 0.002200338 | 0.045908435      | -1.647518677 |
| GTPBP4    | -0.251814122    | 5.73218001         | -3.167509476 | 0.002206466 | 0.045972629      | -1.658751304 |
| ZCCHC2    | -0.307142464    | 3.576307931        | -3.164331081 | 0.002227864 | 0.045994102      | -1.58572858  |
| PEX14     | 0.18131809      | 3.954841805        | 3.164182398  | 0.00222887  | 0.045994102      | -1.587030703 |
| CIR1      | 0.142691427     | 5.297025115        | 3.166036233  | 0.002216361 | 0.045994102      | -1.651664258 |
| TECR      | 0.186968777     | 5.432087656        | 3.164381317  | 0.002227524 | 0.045994102      | -1.658674438 |
| ARF6      | -0.132945291    | 6.576744563        | -3.164924236 | 0.002223856 | 0.045994102      | -1.671045277 |
| RAB8B     | -0.190089341    | 6.316743594        | -3.164407726 | 0.002227346 | 0.045994102      | -1.673030037 |
| ZFP2      | 0.471516713     | -0.631515057       | 3.166305309  | 0.00221455  | 0.045994102      | -1.695488055 |
| TNPO3     | 0.085701847     | 5.984627984        | 3.162808108  | 0.002238186 | 0.046060148      | -1.674719762 |
| TBC1D17   | 0.147161123     | 6.492818403        | 3.163237984  | 0.002235268 | 0.046060148      | -1.676195149 |
| PSMA6     | 0.182200139     | 3.041585888        | 3.161839684  | 0.002244772 | 0.046132669      | -1.544766611 |
| RABGEF1   | 0.203955827     | 1.459412946        | 3.161297141  | 0.00224847  | 0.046145709      | -1.491434617 |
| ARHGEF10L | 0.119605703     | 5.046495641        | 3.160104804  | 0.002256617 | 0.046249895      | -1.658463262 |
| FJX1      | -0.196915654    | 3.784608156        | -3.159397182 | 0.002261465 | 0.046277058      | -1.597010676 |
| MVD       | 0.2631572       | 6.624514458        | 3.159015122  | 0.002264086 | 0.046277058      | -1.68409664  |
| STGALNAC6 | 0.10763454      | 7.106005849        | 3.15819744   | 0.002269706 | 0.046329069      | -1.683275331 |
| CHAF1B    | 0.20312958      | 2.3926205          | 3.157323781  | 0.002275725 | 0.046389075      | -1.512012882 |
| SLC4A4    | -0.323283236    | 0.476354238        | -3.156046567 | 0.002284552 | 0.046443304      | -1.524921722 |
| SPRYD3    | 0.103102689     | 5.81105075         | 3.156160199  | 0.002283765 | 0.046443304      | -1.691379368 |
| CCDC50    | -0.126469948    | 6.613315298        | -3.154997548 | 0.002291825 | 0.046528375      | -1.698094546 |
| DDX5      | -0.226704298    | 8.4589716          | -3.152205466 | 0.00231129  | 0.046860384      | -1.667042156 |
| DMTF1     | -0.213506001    | 3.650856751        | -3.151117596 | 0.002318915 | 0.046887159      | -1.587407017 |
| PSMB9     | 0.219359029     | 4.013991351        | 3.150263255  | 0.00232492  | 0.046887159      | -1.628508428 |
| SOWAHC    | -0.225038747    | 4.613073255        | -3.150985384 | 0.002319843 | 0.046887159      | -1.635104488 |
| HSDL1     | -0.141839201    | 4.146225073        | -3.149673077 | 0.002329077 | 0.046887159      | -1.649268344 |
| WDR17     | -0.443948391    | -0.360056314       | -3.148098943 | 0.002340198 | 0.046887159      | -1.664872828 |
| HRH1      | -0.245150601    | 4.530205225        | -3.148194828 | 0.002339519 | 0.046887159      | -1.67725057  |
| TMEM65    | -0.190155214    | 5.479330044        | -3.148038913 | 0.002340623 | 0.046887159      | -1.703785942 |
| TAF15     | 0.119554765     | 6.857626642        | 3.149908138  | 0.00232742  | 0.046887159      | -1.70973891  |
| UAP1      | -0.205303269    | 6.85163187         | -3.14853379  | 0.002337121 | 0.046887159      | -1.710099464 |
| LDOC1     | 0.214769521     | 5.584249096        | 3.146284151  | 0.00235308  | 0.04707411       | -1.710527722 |
| GPANK1    | 0.120584937     | 3.942276909        | 3.14463555   | 0.002364841 | 0.047121642      | -1.661819842 |
| THAP12    | -0.163024207    | 4.413666259        | -3.144871057 | 0.002363157 | 0.047121642      | -1.678886595 |
| ATN1      | 0.134831582     | 7.903683782        | 3.145387459  | 0.00235947  | 0.047121642      | -1.703579222 |
| AQP5      | 0.906940955     | -3.519287679       | 3.142427531  | 0.002380678 | 0.047374542      | -2.49330272  |
| PNO1      | -0.149258015    | 4.119826183        | -3.141042114 | 0.002390665 | 0.047510523      | -1.670328191 |
| ENOX2     | -0.113028003    | 4.325429542        | -3.139776218 | 0.002399825 | 0.047567053      | -1.680483526 |
| SNX17     | 0.114540064     | 7.333446678        | 3.139996932  | 0.002398225 | 0.047567053      | -1.728953904 |
| DDX41     | 0.100429518     | 5.643280065        | 3.137189007  | 0.002418647 | 0.047877142      | -1.738771751 |
| ZBTB24    | -0.193193562    | 3.745653668        | -3.136458206 | 0.002423989 | 0.047919911      | -1.665351025 |
| RTL8C     | 0.171286199     | 7.719794511        | 3.133808344  | 0.00244345  | 0.048241331      | -1.736811213 |
| HGS       | 0.095999424     | 6.553119866        | 3.132922184  | 0.002449991 | 0.048307152      | -1.757860496 |
| IFITM1    | 0.212515948     | 5.584891936        | 3.132269075  | 0.002454822 | 0.048339134      | -1.748742458 |
| H1FX      | 0.267759728     | 4.979876715        | 3.131630459  | 0.002459554 | 0.048369094      | -1.72498081  |
| CDC25C    | 0.469217888     | -0.199334532       | 3.131104206  | 0.00246346  | 0.048382747      | -1.743484285 |
| KLF11     | -0.249394441    | 4.000951792        | -3.12986329  | 0.002472694 | 0.048500862      | -1.671952091 |
| WDR26     | -0.11998893     | 7.247463343        | -3.129419042 | 0.002476007 | 0.0485027        | -1.759958819 |

| Gene     | Log fold change | Average Expression | t            | P-value     | Adjusted P-value | B            |
|----------|-----------------|--------------------|--------------|-------------|------------------|--------------|
| LOXL1    | 0.165933681     | 7.685087268        | 3.127090447  | 0.002493443 | 0.048717549      | -1.753985208 |
| NDUFS8   | 0.222718801     | 5.666703128        | 3.127309156  | 0.002491801 | 0.048717549      | -1.763554942 |
| MAPK8IP2 | 0.36376192      | -0.404723792       | 3.125618333  | 0.002504525 | 0.048870683      | -1.761806609 |
| USP37    | -0.417599462    | 1.859431593        | -3.125090915 | 0.002508507 | 0.048885051      | -1.599445773 |
| EPHX1    | 0.18062147      | 7.56821241         | 3.124137984  | 0.002515715 | 0.04896219       | -1.766327954 |
| KDM4D    | 0.341761179     | -0.23677035        | 3.122371597  | 0.002529129 | 0.049159733      | -1.676644045 |
| CNTROB   | 0.10368056      | 4.247171677        | 3.121586589  | 0.002535111 | 0.049212517      | -1.728318369 |
| EXOC8    | -0.144317639    | 3.853847368        | -3.12062043  | 0.002542492 | 0.04929228       | -1.694088618 |
| CCT6A    | 0.073746865     | 7.47940173         | 3.119326652  | 0.002552408 | 0.049367872      | -1.778125806 |
| CBFB     | -0.123505568    | 5.350373981        | -3.119256578 | 0.002552946 | 0.049367872      | -1.782553917 |
| GABPB2   | -0.161662263    | 3.036022441        | -3.118403704 | 0.002559503 | 0.049412887      | -1.650065368 |
| LAS1L    | 0.12774909      | 4.721972991        | 3.118101027  | 0.002561834 | 0.049412887      | -1.759283599 |
| ARHGEF17 | -0.168847692    | 5.774788109        | -3.117408551 | 0.002567174 | 0.049452569      | -1.796784233 |
| BSDC1    | -0.08802588     | 5.617307368        | -3.116338463 | 0.002575447 | 0.049548567      | -1.786894486 |
| CYB5R4   | -0.153057673    | 4.086529414        | -3.114344701 | 0.002590926 | 0.049719381      | -1.73057782  |
| EIF4A3   | 0.118166246     | 6.169900897        | 3.114408628  | 0.002590429 | 0.049719381      | -1.808132713 |
| RHOA     | 0.074906506     | 9.484159322        | 3.113203086  | 0.002599829 | 0.049826746      | -1.731486284 |
| CD248    | 0.186493757     | 10.71254685        | 3.112668007  | 0.002604011 | 0.04984349       | -1.693259367 |
