# Supplementary material for: Comparison of time and dose dependent gene expression and affected pathways in primary human fibroblasts after exposure to ionizing radiation
Source: PubMed Central journal article supplement (PMC7488023; doi:10.1186/s10020-020-00203-0), 2020-09-09
Supplement: 10020_2020_203_MOESM10_ESM.pdf [file 10020_2020_203_MOESM10_ESM.pdf]

**Web Table 1C: Differentially expressed genes 2 hours after exposure to high dose ionizing radiation (2 Gray).**

| Gene     | Log fold change | Average Expression | t            | P-value  | Adjusted P-value | B           |
|----------|-----------------|--------------------|--------------|----------|------------------|-------------|
| CDKN1A   | 1.528362877     | 9.578941307        | 28.31804734  | 2.12E-42 | 3.19E-38         | 84.03063643 |
| BBC3     | 1.949777049     | 4.023738717        | 24.84443753  | 1.85E-38 | 1.39E-34         | 75.58248136 |
| RNF19B   | 1.328400864     | 3.164707185        | 24.50784342  | 4.69E-38 | 2.36E-34         | 73.99741243 |
| PPM1D    | 1.111784618     | 4.428273031        | 22.89888567  | 4.65E-36 | 1.75E-32         | 70.71042278 |
| RAP2B    | 0.743209346     | 6.391043181        | 17.79530089  | 5.68E-29 | 1.71E-25         | 55.35260264 |
| ARID3A   | 1.198085947     | 3.536743634        | 17.37594512  | 2.47E-28 | 6.21E-25         | 53.49513599 |
| PPP1R10  | -1.177326775    | 5.684207763        | -17.22732293 | 4.19E-28 | 9.01E-25         | 53.37100848 |
| BTG2     | 1.971750067     | 4.197394101        | 15.75564466  | 8.95E-26 | 1.69E-22         | 47.93943305 |
| SESN1    | 0.832635125     | 4.358072382        | 15.51945005  | 2.17E-25 | 3.64E-22         | 47.16276069 |
| TOB1     | 0.83523574      | 5.784883154        | 15.46908913  | 2.63E-25 | 3.96E-22         | 47.10672284 |
| PLK3     | 1.07330323      | 4.367813593        | 15.23240947  | 6.44E-25 | 8.82E-22         | 46.1765927  |
| IRF2BP2  | 0.650223875     | 6.155245929        | 15.17719219  | 7.95E-25 | 9.97E-22         | 46.02467468 |
| CITED2   | -1.266489564    | 7.284362326        | -15.12587964 | 9.66E-25 | 1.12E-21         | 45.81409043 |
| DEDD2    | 0.959448837     | 4.046853599        | 14.75857194  | 3.96E-24 | 4.26E-21         | 44.26031467 |
| RSRC2    | 1.0023542       | 5.112437589        | 13.75905355  | 2.01E-22 | 2.02E-19         | 40.56786033 |
| MDM2     | 0.944877486     | 6.788792003        | 12.8995805   | 6.50E-21 | 6.12E-18         | 37.17547379 |
| DCP1B    | 0.583965784     | 4.061718856        | 12.88379557  | 6.94E-21 | 6.15E-18         | 37.02946288 |
| TIGAR    | 0.748892714     | 4.312602112        | 12.72480491  | 1.33E-20 | 1.12E-17         | 36.43504267 |
| EGR2     | -1.601619914    | 3.221774446        | -12.488617   | 3.54E-20 | 2.81E-17         | 35.4631009  |
| SPRY2    | -1.103282424    | 4.381484668        | -12.22465653 | 1.06E-19 | 8.00E-17         | 34.41767434 |
| ZNF441   | 0.890544437     | 3.029300148        | 12.1458702   | 1.48E-19 | 1.06E-16         | 33.87231325 |
| TRIB1    | -0.909607925    | 3.62736882         | -12.03567474 | 2.34E-19 | 1.60E-16         | 33.62486117 |
| ITPKC    | 0.666307901     | 4.639786348        | 12.0036302   | 2.68E-19 | 1.76E-16         | 33.50292295 |
| SLC25A25 | -0.898548111    | 3.769731825        | -11.50181685 | 2.24E-18 | 1.40E-15         | 31.41280136 |
| MYC      | -1.42019061     | 4.969945963        | -11.48662343 | 2.39E-18 | 1.44E-15         | 31.35891369 |
| ZNF281   | -0.800262192    | 5.148538314        | -11.4086083  | 3.33E-18 | 1.93E-15         | 31.03163448 |
| CSRNP1   | -1.262313869    | 3.571844999        | -11.25153481 | 6.51E-18 | 3.63E-15         | 30.36985851 |
| KATNBL1  | -0.64858136     | 3.238532637        | -11.01838946 | 1.77E-17 | 9.53E-15         | 29.35568046 |
| TIGD2    | -0.728808434    | 2.481001479        | -10.94933012 | 2.39E-17 | 1.24E-14         | 28.9665302  |
| TMCC1    | -0.350809641    | 4.187774405        | -10.8741126  | 3.30E-17 | 1.66E-14         | 28.76741438 |
| NFKBIE   | 0.820692151     | 2.782827442        | 10.8274594   | 4.04E-17 | 1.96E-14         | 28.4708597  |
| CLP1     | 0.461821421     | 3.834240506        | 10.66987104  | 7.98E-17 | 3.76E-14         | 27.89937849 |
| FST      | 0.576220662     | 6.619768423        | 10.58114146  | 1.17E-16 | 5.36E-14         | 27.51832301 |
| DCAF5    | -0.273637541    | 5.784441832        | -10.46617385 | 1.93E-16 | 8.43E-14         | 27.02602782 |
| PHLDA3   | 0.513248439     | 7.237706873        | 10.46322137  | 1.96E-16 | 8.43E-14         | 27.01280405 |
| DYRK3    | 0.651401112     | 4.28191998         | 10.38632797  | 2.74E-16 | 1.15E-13         | 26.69387805 |
| CEP164   | -0.41494889     | 4.464904601        | -10.21735299 | 5.73E-16 | 2.33E-13         | 25.96888298 |
| MARCH7   | -0.516586875    | 5.848780365        | -10.20179873 | 6.13E-16 | 2.43E-13         | 25.88679283 |
| ARL4D    | 0.709199227     | 3.596746301        | 10.15650454  | 7.47E-16 | 2.83E-13         | 25.70253084 |
| EGR1     | -2.513741281    | 6.810030351        | -10.15539898 | 7.51E-16 | 2.83E-13         | 25.69415346 |
| EPHA2    | 1.086260556     | 3.036113609        | 10.12531063  | 8.56E-16 | 3.15E-13         | 25.56659505 |
| BLOC1S2  | 0.373067778     | 5.890622378        | 10.10218725  | 9.48E-16 | 3.32E-13         | 25.4578349  |
| ZNF649   | 0.654625946     | 2.65928391         | 10.11031714  | 9.14E-16 | 3.28E-13         | 25.4561801  |
| AMOTL2   | -1.829640284    | 6.437816275        | -9.974240643 | 1.66E-15 | 5.68E-13         | 24.91008969 |
| TP53INP1 | 0.866186327     | 5.508580613        | 9.959651443  | 1.77E-15 | 5.81E-13         | 24.846705   |
| ABL2     | -1.037047975    | 6.051190918        | -9.959075508 | 1.77E-15 | 5.81E-13         | 24.83893734 |
| BCL2L1   | 0.478022365     | 6.143834118        | 9.856598714  | 2.78E-15 | 8.73E-13         | 24.39257186 |
| SIN3B    | -0.343046361    | 5.12749706         | -9.836093197 | 3.05E-15 | 9.33E-13         | 24.31647338 |
| ZNF93    | -0.934824773    | 1.484655632        | -9.858419877 | 2.76E-15 | 8.73E-13         | 24.19832949 |
| HILPDA   | 0.741653405     | 2.29563701         | 9.832386055  | 3.10E-15 | 9.33E-13         | 24.18417819 |
| SMYD4    | -0.523176524    | 2.515640738        | -9.786174046 | 3.79E-15 | 1.12E-12         | 24.04751607 |
| KLF7     | -1.086050324    | 4.8151864          | -9.753030884 | 4.39E-15 | 1.27E-12         | 23.95742309 |
| ERF      | 1.128104365     | 6.219476716        | 9.73788184   | 4.69E-15 | 1.33E-12         | 23.87935432 |
| IFFO2    | 0.79500948      | 3.495481602        | 9.695889606  | 5.64E-15 | 1.57E-12         | 23.72505856 |
| RNF214   | -0.344894358    | 3.427979864        | -9.655369791 | 6.75E-15 | 1.82E-12         | 23.55028301 |
| TMEM217  | 1.163401918     | 0.558342338        | 9.65514363   | 6.75E-15 | 1.82E-12         | 23.03559267 |
| DDIT4    | 1.131357878     | 3.769428838        | 9.468413755  | 1.54E-14 | 4.07E-12         | 22.74428554 |
| SLC38A9  | -0.571153941    | 2.826221988        | -9.39882326  | 2.09E-14 | 5.34E-12         | 22.43015645 |
| PFKFB3   | 0.804546054     | 5.158914354        | 9.398841032  | 2.09E-14 | 5.34E-12         | 22.41315684 |
| POLR1C   | 0.75549306      | 3.869990066        | 9.384844611  | 2.23E-14 | 5.59E-12         | 22.38011499 |
| IL6      | -1.951535878    | 1.982741516        | -9.364974462 | 2.43E-14 | 6.00E-12         | 22.24380709 |
| PTGS2    | -1.930973378    | 2.583827388        | -9.329107729 | 2.85E-14 | 6.92E-12         | 22.10743944 |
| HOXA9    | 0.780866329     | 2.911502299        | 9.229106613  | 4.43E-14 | 1.06E-11         | 21.6925837  |
| PHF21A   | -0.479578481    | 5.12586995         | -9.150977684 | 6.27E-14 | 1.47E-11         | 21.33736116 |
| EPC1     | -0.480989303    | 4.143940781        | -9.101496713 | 7.80E-14 | 1.80E-11         | 21.14494112 |
| REPIN1   | -0.29065185     | 5.134372614        | -9.098989761 | 7.89E-14 | 1.80E-11         | 21.10927784 |
| DUSP7    | 0.746857876     | 4.922825719        | 9.009146854  | 1.17E-13 | 2.64E-11         | 20.71807419 |
| CYR61    | -2.515813293    | 7.172185715        | -8.974641261 | 1.37E-13 | 3.03E-11         | 20.58050529 |
| SOCS3    | -1.357782309    | 5.479201848        | -8.943032839 | 1.57E-13 | 3.44E-11         | 20.42082882 |

| Gene      | Log fold change | Average Expression | t            | P-value  | Adjusted P-value | B           |
|-----------|-----------------|--------------------|--------------|----------|------------------|-------------|
| PISD      | 0.443618132     | 4.044412885        | 8.863978617  | 2.24E-13 | 4.81E-11         | 20.11659619 |
| CLK3      | 0.497754042     | 4.206251868        | 8.777745603  | 3.28E-13 | 6.95E-11         | 19.73335348 |
| KLF6      | -0.744898426    | 6.23785017         | -8.77411525  | 3.33E-13 | 6.97E-11         | 19.67437557 |
| RASD1     | 1.399944023     | 3.897393683        | 8.730569582  | 4.04E-13 | 8.22E-11         | 19.55310189 |
| IRS2      | -0.67329298     | 6.069927608        | -8.743699067 | 3.81E-13 | 7.86E-11         | 19.54004064 |
| EPHB3     | 0.990431639     | 5.116817974        | 8.720380528  | 4.23E-13 | 8.49E-11         | 19.48630831 |
| CDKN1B    | 0.434148675     | 4.570327322        | 8.710315712  | 4.42E-13 | 8.76E-11         | 19.43846692 |
| FGF2      | 0.49417361      | 5.899448548        | 8.671328832  | 5.25E-13 | 1.03E-10         | 19.22301052 |
| ZNF2      | 0.666600897     | 2.414994417        | 8.637711723  | 6.10E-13 | 1.17E-10         | 19.12075261 |
| EVC2      | -0.362801271    | 4.110388829        | -8.628322668 | 6.36E-13 | 1.20E-10         | 19.09249518 |
| ARID5B    | -0.726114508    | 7.10762133         | -8.63554957  | 6.16E-13 | 1.17E-10         | 19.07186096 |
| ZNF79     | 0.62693351      | 2.889914548        | 8.604428432  | 7.07E-13 | 1.30E-10         | 19.00629957 |
| TRIM11    | 0.435038825     | 3.847052932        | 8.605431719  | 7.04E-13 | 1.30E-10         | 18.99594615 |
| TRAF4     | 0.474529635     | 4.04860766         | 8.597020593  | 7.31E-13 | 1.33E-10         | 18.93824199 |
| ZNF786    | 0.742793577     | 1.961840646        | 8.554779971  | 8.81E-13 | 1.58E-10         | 18.7148888  |
| ZNF555    | 0.574592511     | 2.23977075         | 8.541915515  | 9.33E-13 | 1.65E-10         | 18.69824095 |
| HPS6      | 0.467223302     | 4.726919039        | 8.481977128  | 1.22E-12 | 2.13E-10         | 18.43009972 |
| TTI1      | -0.383308378    | 4.141844402        | -8.444420026 | 1.44E-12 | 2.49E-10         | 18.28908369 |
| ING2      | 0.556803288     | 3.252382284        | 8.432680647  | 1.52E-12 | 2.59E-10         | 18.25876894 |
| RRP8      | 0.440247384     | 3.35251613         | 8.397944839  | 1.77E-12 | 2.96E-10         | 18.11201341 |
| KCTD6     | 0.571690612     | 2.256614993        | 8.400447622  | 1.75E-12 | 2.96E-10         | 18.10791967 |
| UCK2      | 0.564581408     | 5.05915692         | 8.390412723  | 1.83E-12 | 3.03E-10         | 18.01794768 |
| GTF2B     | 0.368707816     | 4.085202935        | 8.351412188  | 2.17E-12 | 3.56E-10         | 17.87995215 |
| PTGER4    | -1.223032764    | 1.419273007        | -8.33332983  | 2.35E-12 | 3.77E-10         | 17.8275412  |
| PLEKHF1   | 0.66066562      | 5.026845982        | 8.337198734  | 2.31E-12 | 3.75E-10         | 17.78517274 |
| EDRF1     | 0.656750905     | 2.960532807        | 8.298038186  | 2.75E-12 | 4.32E-10         | 17.68461423 |
| PARP16    | -0.456527194    | 2.694356881        | -8.295561546 | 2.78E-12 | 4.32E-10         | 17.67348505 |
| ATXN2L    | -0.379414171    | 6.643587415        | -8.300840241 | 2.72E-12 | 4.31E-10         | 17.60215063 |
| SPRY1     | -1.491943879    | 2.503585826        | -8.267427938 | 3.15E-12 | 4.81E-10         | 17.54003756 |
| ZUFSP     | 0.653210926     | 2.315413151        | 8.266918367  | 3.16E-12 | 4.81E-10         | 17.53503601 |
| KIAA1614  | -0.401549957    | 3.608454138        | -8.220461549 | 3.88E-12 | 5.79E-10         | 17.33214575 |
| ASAP3     | -0.319444489    | 6.725121096        | -8.222878606 | 3.84E-12 | 5.79E-10         | 17.26207946 |
| DBF4      | 0.614080726     | 2.703949132        | 8.168258178  | 4.90E-12 | 7.16E-10         | 17.12523835 |
| ZNF775    | 0.639398895     | 1.823019546        | 8.184075569  | 4.56E-12 | 6.74E-10         | 17.10042411 |
| BORCS6    | 0.589694293     | 2.190199816        | 8.131032475  | 5.77E-12 | 8.29E-10         | 16.93859097 |
| CTC1      | -0.415532314    | 2.69420865         | -8.124775192 | 5.94E-12 | 8.42E-10         | 16.93590684 |
| SPSB1     | 0.778272139     | 5.790773619        | 8.143125716  | 5.47E-12 | 7.93E-10         | 16.91974406 |
| SNAI2     | 0.583298412     | 6.800166099        | 8.123111504  | 5.98E-12 | 8.42E-10         | 16.83001212 |
| SNPH      | -0.602844611    | 3.916471216        | -8.098866909 | 6.66E-12 | 9.20E-10         | 16.79873051 |
| CAMTA2    | -0.309657058    | 5.03568709         | -8.099626847 | 6.64E-12 | 9.20E-10         | 16.74651493 |
| SPRY4     | -0.574653662    | 3.754660943        | -8.068908451 | 7.61E-12 | 1.04E-09         | 16.63160988 |
| ZNF34     | 0.580488801     | 1.528761665        | 8.056654803  | 8.03E-12 | 1.08E-09         | 16.53840314 |
| IER5      | 0.529654043     | 6.031800192        | 8.056135496  | 8.05E-12 | 1.08E-09         | 16.5328736  |
| SURF6     | 0.380709839     | 4.954363541        | 8.044467872  | 8.48E-12 | 1.13E-09         | 16.5184896  |
| SHROOM3   | -0.719098232    | 4.119030279        | -8.017465485 | 9.55E-12 | 1.24E-09         | 16.40807635 |
| SGK1      | -0.743988556    | 6.400361427        | -8.023936804 | 9.28E-12 | 1.23E-09         | 16.39450174 |
| ZNF404    | -0.723366054    | 1.283114933        | -8.000667614 | 1.03E-11 | 1.32E-09         | 16.37898201 |
| EHMT2     | -0.382522423    | 5.895375297        | -8.019533579 | 9.46E-12 | 1.24E-09         | 16.3796174  |
| ZKSCAN4   | 0.636627589     | 2.107599583        | 7.977728553  | 1.14E-11 | 1.45E-09         | 16.26371506 |
| KRCC1     | -0.459121511    | 4.695084235        | -7.971843283 | 1.17E-11 | 1.48E-09         | 16.20902027 |
| BYSL      | 0.387398386     | 4.018675171        | 7.951753433  | 1.28E-11 | 1.60E-09         | 16.13710833 |
| TBC1D10A  | 0.701996055     | 3.008107458        | 7.925592836  | 1.43E-11 | 1.79E-09         | 16.07527901 |
| KCTD21    | 0.547905192     | 3.727474248        | 7.905921265  | 1.57E-11 | 1.92E-09         | 15.97168324 |
| ORC2      | -0.406729097    | 3.078329138        | -7.900888991 | 1.60E-11 | 1.94E-09         | 15.96577854 |
| CSRNP2    | 0.47148297      | 4.803697265        | 7.912021505  | 1.52E-11 | 1.88E-09         | 15.93884006 |
| TNFSF9    | 0.745604281     | 2.0157642          | 7.832341005  | 2.17E-11 | 2.57E-09         | 15.68219614 |
| KLHL25    | 0.688962451     | 1.659633474        | 7.83453047   | 2.15E-11 | 2.57E-09         | 15.63238629 |
| ATG14     | 0.591836306     | 4.354382732        | 7.824308136  | 2.25E-11 | 2.64E-09         | 15.5996559  |
| TOMM20    | 0.19298376      | 7.382595431        | 7.835973849  | 2.13E-11 | 2.57E-09         | 15.57930264 |
| TSHZ1     | -0.397572978    | 5.02322749         | -7.779714114 | 2.73E-11 | 3.17E-09         | 15.36699833 |
| RANBP10   | -0.466891455    | 3.912218445        | -7.744661079 | 3.19E-11 | 3.67E-09         | 15.24976002 |
| ZNF792    | 0.926073434     | 0.668462933        | 7.794542158  | 2.56E-11 | 2.99E-09         | 15.09364981 |
| USP16     | 0.303541371     | 5.647831324        | 7.721467017  | 3.54E-11 | 4.04E-09         | 15.08395263 |
| SUPT20H   | -0.384892757    | 3.794146112        | -7.696882595 | 3.94E-11 | 4.47E-09         | 15.05659921 |
| N4BP2L1   | -0.548921253    | 2.49685235         | -7.682152105 | 4.21E-11 | 4.70E-09         | 15.03796832 |
| ZNF250    | 0.469411159     | 2.723961288        | 7.672086783  | 4.40E-11 | 4.84E-09         | 14.99574685 |
| AHDC1     | 0.8607082       | 5.300008251        | 7.676557628  | 4.31E-11 | 4.78E-09         | 14.93025586 |
| DNTTIP2   | 0.294127535     | 6.084594931        | 7.687819749  | 4.10E-11 | 4.61E-09         | 14.92939321 |
| NOCT      | -0.929379485    | 1.541791622        | -7.650857901 | 4.83E-11 | 5.13E-09         | 14.90259411 |
| TNFRSF10D | 0.635108236     | 4.215595526        | 7.66386474   | 4.56E-11 | 4.94E-09         | 14.87295417 |

| Gene      | Log fold change | Average Expression | t            | P-value  | Adjusted P-value | B           |
|-----------|-----------------|--------------------|--------------|----------|------------------|-------------|
| GAB2      | -0.413791761    | 4.954672794        | -7.665163892 | 4.54E-11 | 4.94E-09         | 14.861663   |
| ORC5      | -0.412663672    | 3.347553121        | -7.64346109  | 4.99E-11 | 5.26E-09         | 14.85731052 |
| PHLDA1    | -0.771506667    | 5.933007737        | -7.660021131 | 4.64E-11 | 4.99E-09         | 14.81290517 |
| NIP7      | 0.330690135     | 5.116719747        | 7.653619038  | 4.77E-11 | 5.10E-09         | 14.79894046 |
| EMSY      | -0.659252079    | 3.812486004        | -7.621240659 | 5.51E-11 | 5.72E-09         | 14.7488981  |
| ELL       | 0.419295476     | 4.299972796        | 7.63794128   | 5.11E-11 | 5.35E-09         | 14.74601068 |
| MRPS31    | -0.558519951    | 3.071299946        | -7.591291705 | 6.28E-11 | 6.48E-09         | 14.62936019 |
| ZNF48     | 0.628343677     | 2.688541279        | 7.568367718  | 6.95E-11 | 7.07E-09         | 14.55253305 |
| TAF5      | 0.601304071     | 2.126702262        | 7.566530139  | 7.01E-11 | 7.08E-09         | 14.54244906 |
| TNS2      | -0.367877743    | 7.209638618        | -7.584463404 | 6.47E-11 | 6.64E-09         | 14.48649807 |
| SEMA4C    | 0.415107105     | 4.049055391        | 7.563123579  | 7.11E-11 | 7.14E-09         | 14.46723459 |
| MPHOSPH10 | 0.446875857     | 5.150511353        | 7.556714116  | 7.32E-11 | 7.30E-09         | 14.38386805 |
| GCH1      | 0.807579272     | 2.292021016        | 7.511209733  | 8.94E-11 | 8.76E-09         | 14.30959343 |
| GAS1      | -0.555798588    | 6.346857465        | -7.521747777 | 8.54E-11 | 8.46E-09         | 14.210661   |
| ZMYM3     | -0.41994782     | 4.933911627        | -7.510761425 | 8.96E-11 | 8.76E-09         | 14.18573988 |
| PDE4B     | -1.135846791    | 2.471099876        | -7.480335002 | 1.02E-10 | 9.77E-09         | 14.17254463 |
| RAB3A     | 0.861537553     | 1.450154373        | 7.491314131  | 9.76E-11 | 9.49E-09         | 14.17057584 |
| RCOR3     | -0.322702245    | 4.667935028        | -7.488452017 | 9.88E-11 | 9.54E-09         | 14.11550231 |
| BCL3      | 0.652055218     | 5.381712417        | 7.485753874  | 1.00E-10 | 9.60E-09         | 14.06646863 |
| NFIC      | -0.264137948    | 7.901152932        | -7.474265449 | 1.05E-10 | 9.97E-09         | 14.01958892 |
| RNF168    | 0.377755739     | 4.640752936        | 7.457943235  | 1.13E-10 | 1.06E-08         | 13.97878567 |
| KCNE4     | -0.728285686    | 2.743789532        | -7.433809825 | 1.26E-10 | 1.17E-08         | 13.96977585 |
| GTPBP4    | 0.595641153     | 5.73218001         | 7.461607112  | 1.11E-10 | 1.05E-08         | 13.95431088 |
| ENO2      | -0.431747466    | 4.872701056        | -7.432763086 | 1.26E-10 | 1.17E-08         | 13.85429892 |
| BTG3      | 0.401089582     | 4.032592312        | 7.410559356  | 1.39E-10 | 1.26E-08         | 13.8037941  |
| KANSL2    | 0.430709435     | 3.845354325        | 7.406421825  | 1.42E-10 | 1.28E-08         | 13.80356491 |
| PHF13     | 0.750917597     | 5.251495747        | 7.423821094  | 1.31E-10 | 1.21E-08         | 13.80062334 |
| FILIP1L   | -0.733497593    | 5.429270258        | -7.411399139 | 1.39E-10 | 1.26E-08         | 13.73119594 |
| CDC25B    | -0.39679197     | 7.025777452        | -7.403179044 | 1.44E-10 | 1.29E-08         | 13.69556821 |
| USP19     | -0.284617487    | 5.527758812        | -7.40029875  | 1.46E-10 | 1.29E-08         | 13.69505451 |
| RGS3      | 0.715625678     | 5.908003305        | 7.400074834  | 1.46E-10 | 1.29E-08         | 13.68319951 |
| TRIM68    | -0.541530255    | 2.875231273        | -7.353365584 | 1.79E-10 | 1.56E-08         | 13.63872587 |
| SLC3A2    | -0.564680926    | 7.418706419        | -7.3781512   | 1.61E-10 | 1.41E-08         | 13.60751186 |
| RSAD1     | -0.408364958    | 4.360944924        | -7.364605268 | 1.70E-10 | 1.49E-08         | 13.57900249 |
| ZNF615    | 0.497444261     | 2.913860868        | 7.338783076  | 1.91E-10 | 1.64E-08         | 13.57280354 |
| LRCH1     | -0.376719844    | 4.130630219        | -7.342498456 | 1.88E-10 | 1.63E-08         | 13.51559272 |
| PCF11     | -0.487083213    | 4.194386172        | -7.33516802  | 1.94E-10 | 1.66E-08         | 13.48165026 |
| NFRKB     | -0.392622268    | 3.892256458        | -7.319134985 | 2.08E-10 | 1.76E-08         | 13.42258425 |
| CDK9      | 0.247210181     | 5.209376899        | 7.323185192  | 2.04E-10 | 1.74E-08         | 13.37111598 |
| TSC2D2    | -0.594508339    | 4.592108337        | -7.310205168 | 2.16E-10 | 1.82E-08         | 13.329786   |
| WDCP      | 0.768297246     | 2.569546029        | 7.278818571  | 2.48E-10 | 2.07E-08         | 13.32494017 |
| TBC1D13   | -0.22847132     | 5.61479244         | -7.303904583 | 2.22E-10 | 1.86E-08         | 13.2788402  |
| SERPINB8  | 0.467623553     | 4.746140507        | 7.272355756  | 2.55E-10 | 2.11E-08         | 13.17543614 |
| DCP2      | 0.548693024     | 3.506217014        | 7.243688692  | 2.90E-10 | 2.36E-08         | 13.14294379 |
| ZNF654    | 0.50182243      | 3.798547372        | 7.243542677  | 2.90E-10 | 2.36E-08         | 13.10403886 |
| ELMSAN1   | -0.66520468     | 4.077134731        | -7.248053493 | 2.84E-10 | 2.34E-08         | 13.09407113 |
| USP21     | -0.392190287    | 3.607283331        | -7.234911652 | 3.01E-10 | 2.41E-08         | 13.08189717 |
| PLK2      | 0.624873376     | 4.854332864        | 7.238148452  | 2.97E-10 | 2.39E-08         | 13.03074254 |
| DENND2C   | 0.843870664     | 2.317854819        | 7.199476363  | 3.51E-10 | 2.73E-08         | 12.98718021 |
| KLF2      | -1.01333332     | 3.463363547        | -7.212921435 | 3.31E-10 | 2.61E-08         | 12.95901899 |
| RELB      | 0.502451185     | 4.513188695        | 7.21915625   | 3.22E-10 | 2.57E-08         | 12.95854597 |
| ZNF563    | 0.784473698     | 0.77161294         | 7.242703529  | 2.91E-10 | 2.36E-08         | 12.94306664 |
| E2F7      | 0.906016891     | 1.951261267        | 7.187650203  | 3.70E-10 | 2.84E-08         | 12.93230206 |
| IER3IP1   | 0.26075161      | 4.980832651        | 7.218352206  | 3.24E-10 | 2.57E-08         | 12.93228977 |
| CCDC174   | 0.271739617     | 4.016640839        | 7.205065219  | 3.43E-10 | 2.69E-08         | 12.92827034 |
| PHF23     | 0.708592067     | 5.726053083        | 7.20142035   | 3.48E-10 | 2.72E-08         | 12.8407603  |
| TRERF1    | -0.710847184    | 4.789533086        | -7.187776562 | 3.70E-10 | 2.84E-08         | 12.83758726 |
| KAT14     | -0.417861766    | 3.726469447        | -7.172969382 | 3.95E-10 | 2.99E-08         | 12.82541499 |
| TBK1      | 0.303994242     | 4.594493836        | 7.182760637  | 3.78E-10 | 2.89E-08         | 12.79039582 |
| CDK7      | 0.365674606     | 4.160941339        | 7.176169926  | 3.89E-10 | 2.96E-08         | 12.77851261 |
| JUNB      | -0.923106851    | 6.337617529        | -7.157705866 | 4.22E-10 | 3.18E-08         | 12.6406422  |
| ZNF57     | 0.711473666     | 1.250619665        | 7.123594842  | 4.90E-10 | 3.65E-08         | 12.63841273 |
| PEX11A    | -0.532386055    | 1.944064876        | -7.111313623 | 5.17E-10 | 3.83E-08         | 12.61787564 |
| ZNF207    | 0.216783108     | 6.46216393         | 7.151791657  | 4.33E-10 | 3.24E-08         | 12.61129127 |
| PPP2R5B   | -0.341324099    | 4.13071913         | -7.103622561 | 5.34E-10 | 3.93E-08         | 12.48088167 |
| HAS2      | -0.745596792    | 3.817740075        | -7.100162292 | 5.42E-10 | 3.97E-08         | 12.47562303 |
| FRAT2     | 0.637462823     | 2.39554511         | 7.077271072  | 5.99E-10 | 4.32E-08         | 12.47356602 |
| ING1      | 0.459584418     | 3.88449285         | 7.085949265  | 5.77E-10 | 4.18E-08         | 12.41471732 |
| SRSF3     | 0.251110488     | 7.14741694         | 7.10454037   | 5.32E-10 | 3.93E-08         | 12.41262436 |
| CDCA4     | 0.32770387      | 3.00130011         | 7.066962159  | 6.27E-10 | 4.48E-08         | 12.39717936 |

| Gene     | Log fold change | Average Expression | t            | P-value  | Adjusted P-value | B           |
|----------|-----------------|--------------------|--------------|----------|------------------|-------------|
| KIAA0753 | -0.458828304    | 3.141176367        | -7.062096907 | 6.41E-10 | 4.53E-08         | 12.38056376 |
| WDR43    | 0.486089346     | 5.634297041        | 7.088304442  | 5.71E-10 | 4.16E-08         | 12.34347191 |
| USP35    | -0.515013004    | 2.676570771        | -7.045750886 | 6.88E-10 | 4.78E-08         | 12.33639329 |
| CSNK1G1  | -0.577432976    | 4.141590378        | -7.063246983 | 6.37E-10 | 4.53E-08         | 12.33591242 |
| ZNF195   | 0.323897922     | 3.50271428         | 7.053754401  | 6.64E-10 | 4.65E-08         | 12.3044585  |
| RXR8     | -0.296682079    | 4.913670393        | -7.06700597  | 6.27E-10 | 4.48E-08         | 12.28585536 |
| ZFPM2    | -0.641754373    | 2.845053828        | -7.029200978 | 7.39E-10 | 5.02E-08         | 12.2528927  |
| KIAA0907 | -0.604014283    | 3.340576907        | -7.029415643 | 7.39E-10 | 5.02E-08         | 12.23483229 |
| MAP3K10  | -0.514631891    | 2.729229699        | -7.021047437 | 7.66E-10 | 5.18E-08         | 12.21640708 |
| MAP2K3   | 0.561347242     | 6.536569544        | 7.058931548  | 6.49E-10 | 4.57E-08         | 12.21348246 |
| SELENOS  | 0.367629556     | 5.3078796          | 7.047575064  | 6.82E-10 | 4.76E-08         | 12.18294082 |
| NFKBIZ   | -1.638933335    | 1.118680004        | -7.007000953 | 8.14E-10 | 5.43E-08         | 12.17498097 |
| NKRF     | 0.487086459     | 3.010242763        | 7.011502727  | 7.99E-10 | 5.35E-08         | 12.16076957 |
| FHL2     | 0.347033643     | 7.000128448        | 7.04357947   | 6.94E-10 | 4.80E-08         | 12.15667204 |
| ATN1     | -0.304538547    | 7.903683782        | -7.029547724 | 7.38E-10 | 5.02E-08         | 12.11371469 |
| SBNO2    | 0.382545248     | 6.1177573          | 7.032831718  | 7.28E-10 | 5.01E-08         | 12.10110793 |
| EGR3     | -0.731794501    | 3.819849279        | -7.015605797 | 7.84E-10 | 5.28E-08         | 12.03089962 |
| OTUD1    | -0.493350062    | 3.192914073        | -6.977821721 | 9.25E-10 | 6.03E-08         | 11.99931046 |
| CDC37L1  | 0.337661102     | 4.1200745          | 6.980242716  | 9.15E-10 | 6.02E-08         | 11.95749187 |
| MORC2    | -0.283357353    | 4.966363712        | -6.980597339 | 9.14E-10 | 6.02E-08         | 11.91731116 |
| CRY2     | 0.377295739     | 4.576926977        | 6.976918334  | 9.28E-10 | 6.03E-08         | 11.91075307 |
| EDN1     | -1.467065411    | -0.460296738       | -6.99606692  | 8.54E-10 | 5.67E-08         | 11.9031225  |
| KLF9     | 0.445707628     | 4.966092688        | 6.979169917  | 9.19E-10 | 6.02E-08         | 11.89636801 |
| ZNF667   | 0.699047896     | 3.156848324        | 6.934511172  | 1.12E-09 | 7.10E-08         | 11.85792119 |
| ZFP64    | -0.329466536    | 4.026706894        | -6.952847026 | 1.03E-09 | 6.67E-08         | 11.85416328 |
| USP27X   | 0.452449944     | 2.537054077        | 6.923025539  | 1.17E-09 | 7.43E-08         | 11.81227657 |
| MOB4     | 0.31823962      | 4.220203624        | 6.942645047  | 1.08E-09 | 6.94E-08         | 11.7824371  |
| MAU2     | -0.266678486    | 4.89619244         | -6.938389124 | 1.10E-09 | 7.04E-08         | 11.73552159 |
| NFATC1   | -0.406895153    | 3.954438508        | -6.919028419 | 1.19E-09 | 7.53E-08         | 11.71935653 |
| NIFK     | 0.337653807     | 5.308837163        | 6.935180608  | 1.11E-09 | 7.10E-08         | 11.70321616 |
| DISP1    | -0.546402976    | 2.757101556        | -6.878887173 | 1.42E-09 | 8.88E-08         | 11.62598213 |
| MAD2L1BP | 0.326880683     | 4.026908892        | 6.878112083  | 1.43E-09 | 8.88E-08         | 11.52234076 |
| TFB2M    | 0.323642919     | 3.598560964        | 6.855600998  | 1.57E-09 | 9.75E-08         | 11.45019148 |
| MTCL1    | -0.370288961    | 6.909153688        | -6.879177055 | 1.42E-09 | 8.88E-08         | 11.44503609 |
| MEX3A    | 0.865032788     | 1.797947981        | 6.830105728  | 1.76E-09 | 1.07E-07         | 11.441494   |
| PARS2    | 0.497733367     | 2.515983215        | 6.82902987   | 1.77E-09 | 1.07E-07         | 11.43524338 |
| C2CD2L   | 0.570453507     | 2.2345947          | 6.808386416  | 1.93E-09 | 1.15E-07         | 11.35378622 |
| UAP1     | 0.443559073     | 6.85163187         | 6.847905861  | 1.63E-09 | 1.00E-07         | 11.31215107 |
| FAM212A  | 0.77938665      | 2.452264684        | 6.792589142  | 2.07E-09 | 1.20E-07         | 11.27790655 |
| ARC      | 1.139958727     | 0.284636044        | 6.798788408  | 2.01E-09 | 1.19E-07         | 11.26145721 |
| ZNF324B  | 0.65352605      | 1.883066701        | 6.785008048  | 2.14E-09 | 1.23E-07         | 11.2507727  |
| IRS1     | -0.479309502    | 5.998819712        | -6.832533166 | 1.74E-09 | 1.06E-07         | 11.24742404 |
| ZNF584   | 0.37839947      | 3.594916629        | 6.802239854  | 1.98E-09 | 1.18E-07         | 11.24310772 |
| ZNF230   | 0.600563318     | 1.889952638        | 6.781424086  | 2.17E-09 | 1.24E-07         | 11.23627153 |
| ZBTB7B   | 0.376461018     | 4.437794707        | 6.809449197  | 1.92E-09 | 1.15E-07         | 11.2226922  |
| HPS4     | -0.254247654    | 4.425754514        | -6.813217016 | 1.89E-09 | 1.14E-07         | 11.21657968 |
| HSPA14   | 0.263809315     | 4.328006453        | 6.808609414  | 1.93E-09 | 1.15E-07         | 11.21391984 |
| ZNF248   | -0.528505766    | 2.50186373         | -6.775537013 | 2.23E-09 | 1.25E-07         | 11.21250499 |
| MAK16    | 0.420373467     | 3.875494573        | 6.795216854  | 2.04E-09 | 1.19E-07         | 11.18255925 |
| THSD1    | 0.653998323     | 3.121218096        | 6.783996675  | 2.15E-09 | 1.23E-07         | 11.177533   |
| FOSL2    | -0.697008925    | 7.248480997        | -6.810881736 | 1.91E-09 | 1.15E-07         | 11.17542009 |
| EEDP1    | -0.409821489    | 4.88099409         | -6.797159008 | 2.03E-09 | 1.19E-07         | 11.15968878 |
| RAB40C   | -0.288223827    | 3.991638463        | -6.780992022 | 2.17E-09 | 1.24E-07         | 11.13852777 |
| TEAD4    | 0.484497603     | 3.580425489        | 6.776944612  | 2.21E-09 | 1.25E-07         | 11.12899407 |
| PYGO2    | -0.2318735      | 4.882586005        | -6.792318945 | 2.07E-09 | 1.20E-07         | 11.1263357  |
| LMCD1    | 0.695557894     | 6.67097804         | 6.798505463  | 2.01E-09 | 1.19E-07         | 11.10682809 |
| COG8     | -0.24907217     | 3.958078499        | -6.776916546 | 2.21E-09 | 1.25E-07         | 11.10301986 |
| PSTPIP2  | 0.494267174     | 2.24355641         | 6.750818509  | 2.48E-09 | 1.37E-07         | 11.10256082 |
| PNRC2    | 0.30707952      | 5.262119797        | 6.791198359  | 2.08E-09 | 1.20E-07         | 11.09151862 |
| SUFU     | -0.397079024    | 4.925692768        | -6.758039311 | 2.40E-09 | 1.34E-07         | 10.98820251 |
| FAM117B  | -0.544694558    | 2.356899243        | -6.721482868 | 2.81E-09 | 1.53E-07         | 10.98612649 |
| HYLS1    | 0.425202359     | 2.854120555        | 6.726677421  | 2.75E-09 | 1.50E-07         | 10.98069403 |
| CASP3    | 0.34772592      | 4.970203619        | 6.759542155  | 2.38E-09 | 1.34E-07         | 10.97377739 |
| CXCL8    | -1.68008117     | -1.419650404       | -6.837863546 | 1.70E-09 | 1.04E-07         | 10.96593134 |
| CCDC9    | 0.291172936     | 4.557667371        | 6.756193383  | 2.42E-09 | 1.34E-07         | 10.96499939 |
| PPP1R3B  | -0.409664659    | 4.911958339        | -6.756071812 | 2.42E-09 | 1.34E-07         | 10.9611266  |
| PDGFA    | 0.772210619     | 2.054681483        | 6.707223742  | 2.99E-09 | 1.60E-07         | 10.93377578 |
| ZNF131   | 0.295069417     | 4.41857802         | 6.740589863  | 2.59E-09 | 1.42E-07         | 10.92338533 |
| POLRMT   | -0.325463211    | 4.041310195        | -6.720714451 | 2.82E-09 | 1.53E-07         | 10.88371012 |
| LACTB    | 0.276267332     | 4.600366481        | 6.732399112  | 2.68E-09 | 1.47E-07         | 10.86897215 |

| Gene     | Log fold change | Average Expression | t            | P-value  | Adjusted P-value | B           |
|----------|-----------------|--------------------|--------------|----------|------------------|-------------|
| CBX4     | 0.328664361     | 3.612345311        | 6.713633071  | 2.91E-09 | 1.56E-07         | 10.8661724  |
| TCHP     | -0.325730986    | 3.852572961        | -6.714618167 | 2.90E-09 | 1.56E-07         | 10.84517608 |
| HUNK     | -0.81325212     | 3.908125227        | -6.707709186 | 2.98E-09 | 1.60E-07         | 10.84198217 |
| C19orf44 | -0.45438058     | 1.993211342        | -6.675089641 | 3.43E-09 | 1.80E-07         | 10.80127605 |
| SLC25A32 | 0.423203545     | 4.825436785        | 6.702741502  | 3.05E-09 | 1.62E-07         | 10.72246236 |
| TUBB2A   | 0.315385797     | 4.516978986        | 6.689333553  | 3.23E-09 | 1.70E-07         | 10.7130083  |
| EZH1     | -0.296622141    | 4.500825299        | -6.689250197 | 3.23E-09 | 1.70E-07         | 10.70752261 |
| BAK1     | 0.497093598     | 3.210743888        | 6.659200553  | 3.68E-09 | 1.90E-07         | 10.68507581 |
| DUSP14   | 0.456324913     | 6.059343135        | 6.69637524   | 3.13E-09 | 1.66E-07         | 10.66855028 |
| FAM43A   | 0.64212213      | 4.466314543        | 6.680092035  | 3.36E-09 | 1.76E-07         | 10.65095448 |
| DPH1     | -0.275380814    | 4.589505294        | -6.674451582 | 3.44E-09 | 1.80E-07         | 10.61715311 |
| TBC1D31  | -0.503826097    | 1.815630738        | -6.627024522 | 4.23E-09 | 2.16E-07         | 10.60352349 |
| ANAPC5   | 0.161771778     | 6.452380026        | 6.666498252  | 3.56E-09 | 1.85E-07         | 10.54158889 |
| GLI2     | -0.60520684     | 4.109991595        | -6.630602152 | 4.16E-09 | 2.14E-07         | 10.52624976 |
| NUMA1    | -0.234181545    | 7.466547827        | -6.635326066 | 4.08E-09 | 2.10E-07         | 10.42363283 |
| PUM3     | 0.330103276     | 4.790576627        | 6.622985547  | 4.30E-09 | 2.20E-07         | 10.41557949 |
| PAFAH2   | -0.376074256    | 3.022976839        | -6.591222901 | 4.93E-09 | 2.48E-07         | 10.38597871 |
| DNAJC2   | 0.323501746     | 4.647989673        | 6.61250336   | 4.50E-09 | 2.29E-07         | 10.37860828 |
| CLK2     | 0.692295468     | 3.206244649        | 6.570666258  | 5.38E-09 | 2.66E-07         | 10.32334077 |
| RBBP6    | -0.311850936    | 5.579448775        | -6.609667508 | 4.55E-09 | 2.31E-07         | 10.30436566 |
| NUDT12   | -0.493271244    | 2.76159686         | -6.562662919 | 5.57E-09 | 2.74E-07         | 10.30021285 |
| ADAMTS1  | -0.813988689    | 6.247424984        | -6.595135048 | 4.85E-09 | 2.45E-07         | 10.24298897 |
| AHRR     | -0.409778474    | 5.529719084        | -6.585293439 | 5.06E-09 | 2.54E-07         | 10.2246949  |
| BRIX1    | 0.329954227     | 4.265850565        | 6.579102838  | 5.19E-09 | 2.58E-07         | 10.22100483 |
| DLG4     | -0.292069318    | 4.278473108        | -6.576071391 | 5.26E-09 | 2.61E-07         | 10.21985329 |
| PTP4A1   | 0.322556571     | 7.322408638        | 6.582139126  | 5.13E-09 | 2.56E-07         | 10.1960601  |
| SOCS5    | 0.601903757     | 7.134241271        | 6.581656169  | 5.14E-09 | 2.56E-07         | 10.18694879 |
| ERI2     | -0.497363399    | 1.802953416        | -6.526127173 | 6.52E-09 | 3.12E-07         | 10.17881355 |
| FAM214A  | -0.488155125    | 3.816023579        | -6.550912881 | 5.86E-09 | 2.87E-07         | 10.15581841 |
| C11orf84 | 0.385097402     | 3.922550741        | 6.545388991  | 6.00E-09 | 2.90E-07         | 10.1401672  |
| KATNAL1  | -0.392558928    | 4.26854648         | -6.543791529 | 6.04E-09 | 2.91E-07         | 10.09754664 |
| CLEC16A  | -0.333138429    | 4.464108646        | -6.547368401 | 5.95E-09 | 2.90E-07         | 10.08547213 |
| HNRNPDL  | 0.256380134     | 7.306849616        | 6.556244953  | 5.73E-09 | 2.81E-07         | 10.07844259 |
| NOP2     | 0.415076341     | 5.140181867        | 6.546515517  | 5.97E-09 | 2.90E-07         | 10.06895464 |
| MSANTD2  | 0.429206735     | 2.584112078        | 6.503657146  | 7.18E-09 | 3.41E-07         | 10.06836562 |
| RBM26    | -0.226931744    | 4.777061123        | -6.539902035 | 6.15E-09 | 2.95E-07         | 10.05842629 |
| AIMP1    | 0.28643124      | 5.445630436        | 6.545997078  | 5.99E-09 | 2.90E-07         | 10.04742907 |
| HSF2     | 0.374083912     | 3.404001352        | 6.49404011   | 7.48E-09 | 3.53E-07         | 9.96345706  |
| HES1     | 0.66507725      | 4.343279933        | 6.502936674  | 7.20E-09 | 3.41E-07         | 9.884876897 |
| RUSC2    | -0.311624781    | 5.867802485        | -6.502712237 | 7.21E-09 | 3.41E-07         | 9.852756304 |
| GABPB1   | 0.263552891     | 4.623964466        | 6.487296886  | 7.70E-09 | 3.62E-07         | 9.841106471 |
| ZNF16    | -0.30452594     | 3.333962554        | -6.456382648 | 8.79E-09 | 4.10E-07         | 9.799055077 |
| MEX3B    | 0.66626231      | 2.657906876        | 6.440631196  | 9.40E-09 | 4.34E-07         | 9.794193164 |
| USP30    | -0.339144763    | 3.301901702        | -6.449318089 | 9.06E-09 | 4.21E-07         | 9.78621475  |
| FBXL20   | -0.468013012    | 4.065768714        | -6.460379334 | 8.64E-09 | 4.04E-07         | 9.775001033 |
| LFNG     | 1.292800086     | 2.359853396        | 6.424995801  | 1.01E-08 | 4.60E-07         | 9.757330374 |
| SIRT7    | 0.433745778     | 2.938815993        | 6.43398404   | 9.67E-09 | 4.46E-07         | 9.756909279 |
| KDM4B    | -0.310065918    | 5.396896254        | -6.467488082 | 8.38E-09 | 3.93E-07         | 9.729866454 |
| ZCCHC2   | 0.67539543      | 3.576307931        | 6.419170424  | 1.03E-08 | 4.69E-07         | 9.645069284 |
| PPP1R15B | -0.428758483    | 4.861127733        | -6.442418457 | 9.33E-09 | 4.33E-07         | 9.62421992  |
| DMTF1    | 0.401588796     | 3.650856751        | 6.422276432  | 1.02E-08 | 4.64E-07         | 9.610314495 |
| PRICKLE1 | -0.632691375    | 3.080605501        | -6.405811198 | 1.09E-08 | 4.95E-07         | 9.607275855 |
| NSD3     | -0.304267716    | 5.634840997        | -6.431535733 | 9.78E-09 | 4.49E-07         | 9.563351838 |
| NXT1     | 0.410493541     | 3.317768375        | 6.39247011   | 1.16E-08 | 5.21E-07         | 9.533337031 |
| PTPDC1   | -0.516264553    | 1.85219879         | -6.363090936 | 1.31E-08 | 5.85E-07         | 9.51471722  |
| CPEB1    | -0.506791302    | 2.935544899        | -6.369571173 | 1.27E-08 | 5.71E-07         | 9.506163658 |
| RHOB     | -0.466317121    | 5.586634923        | -6.404274997 | 1.10E-08 | 4.97E-07         | 9.445759133 |
| AHCTF1   | 0.433009922     | 4.034760832        | 6.370651164  | 1.27E-08 | 5.70E-07         | 9.397876972 |
| PIM3     | 0.524069707     | 3.957166409        | 6.359987649  | 1.33E-08 | 5.90E-07         | 9.339424023 |
| LRRC27   | -0.301509129    | 3.472464359        | -6.35018584  | 1.38E-08 | 6.10E-07         | 9.337881928 |
| FOXC1    | -0.50996671     | 3.785569714        | -6.359910256 | 1.33E-08 | 5.90E-07         | 9.335403889 |
| ZNF335   | 0.311114055     | 4.047217173        | 6.352902119  | 1.37E-08 | 6.06E-07         | 9.30817695  |
| EIF1AD   | 0.296238608     | 4.363042681        | 6.350095083  | 1.38E-08 | 6.10E-07         | 9.283627022 |
| ZNF548   | -0.304727219    | 2.839872652        | -6.313758231 | 1.62E-08 | 6.99E-07         | 9.249710587 |
| UHRF2    | -0.471197883    | 4.163104614        | -6.328572903 | 1.52E-08 | 6.62E-07         | 9.245493323 |
| MADD     | -0.329493911    | 4.961093935        | -6.339130258 | 1.45E-08 | 6.37E-07         | 9.220149657 |
| PPP2R2A  | 0.259499932     | 4.876669053        | 6.327279729  | 1.53E-08 | 6.64E-07         | 9.1613901   |
| FBXO45   | 0.443079412     | 3.83216195         | 6.309681678  | 1.64E-08 | 7.09E-07         | 9.151919417 |
| BET1L    | 0.223003871     | 5.874189111        | 6.331254695  | 1.50E-08 | 6.57E-07         | 9.141792625 |
| WHRN     | -0.567977174    | 2.534640824        | -6.285575805 | 1.82E-08 | 7.79E-07         | 9.139809453 |

| Gene     | Log fold change | Average Expression | t            | P-value  | Adjusted P-value | B           |
|----------|-----------------|--------------------|--------------|----------|------------------|-------------|
| KCTD11   | 0.360976391     | 5.022761533        | 6.324175494  | 1.55E-08 | 6.71E-07         | 9.138506767 |
| BANP     | -0.401349498    | 2.642754272        | -6.268066144 | 1.96E-08 | 8.32E-07         | 9.088820564 |
| ZNF343   | 0.441013282     | 2.585851869        | 6.260464381  | 2.03E-08 | 8.48E-07         | 9.073411985 |
| PER1     | -0.379549532    | 3.927861469        | -6.300731647 | 1.71E-08 | 7.35E-07         | 9.046116779 |
| ZMYM6    | 0.377061199     | 2.695579169        | 6.261809721  | 2.01E-08 | 8.45E-07         | 9.043135062 |
| CDKN2AIP | 0.314639663     | 3.65047322         | 6.276923469  | 1.89E-08 | 8.04E-07         | 9.035048351 |
| CXXC1    | -0.323293503    | 4.920979352        | -6.291465644 | 1.78E-08 | 7.62E-07         | 8.995733765 |
| FBXW7    | 0.44264693      | 3.679572079        | 6.264774824  | 1.99E-08 | 8.39E-07         | 8.983700939 |
| GRK2     | -0.186997036    | 5.242496109        | -6.282440221 | 1.85E-08 | 7.88E-07         | 8.959931537 |
| PGBD1    | -0.263642331    | 2.648871964        | -6.229297646 | 2.31E-08 | 9.49E-07         | 8.933812548 |
| PDCD7    | 0.251324083     | 4.735357925        | 6.265614598  | 1.98E-08 | 8.39E-07         | 8.913175403 |
| LANCL2   | 0.327022542     | 4.704874196        | 6.262177631  | 2.01E-08 | 8.45E-07         | 8.89565898  |
| COIL     | 0.26400843      | 3.932233374        | 6.246258639  | 2.15E-08 | 8.95E-07         | 8.879018359 |
| NUAK2    | -1.013101895    | 0.782516435        | -6.201367601 | 2.60E-08 | 1.05E-06         | 8.869110319 |
| ZFXH2    | -0.844767234    | 0.566619232        | -6.22533604  | 2.35E-08 | 9.63E-07         | 8.867342192 |
| RGS12    | -0.28408438     | 4.014798202        | -6.239370258 | 2.22E-08 | 9.19E-07         | 8.845191483 |
| PXN      | -0.219942286    | 7.064224426        | -6.259802262 | 2.03E-08 | 8.48E-07         | 8.838649562 |
| CCDC120  | -0.414277953    | 2.229933113        | -6.198937593 | 2.63E-08 | 1.06E-06         | 8.834135604 |
| KCTD1    | -0.341725461    | 2.988684013        | -6.205226486 | 2.56E-08 | 1.05E-06         | 8.810560805 |
| KSR1     | -0.589460579    | 3.080993261        | -6.202430515 | 2.59E-08 | 1.05E-06         | 8.77751761  |
| SH2B1    | -0.274950182    | 4.913429194        | -6.23680183  | 2.24E-08 | 9.27E-07         | 8.773317494 |
| NDEL1    | 0.278149366     | 5.607532935        | 6.236218837  | 2.25E-08 | 9.27E-07         | 8.745451719 |
| UBE3B    | -0.213320537    | 5.304263561        | -6.231479684 | 2.29E-08 | 9.43E-07         | 8.734428214 |
| NRDE2    | 0.402359433     | 3.492533117        | 6.198683508  | 2.63E-08 | 1.06E-06         | 8.719101782 |
| ZNF558   | -0.275991946    | 3.259449283        | -6.18626214  | 2.77E-08 | 1.11E-06         | 8.69551542  |
| NDOR1    | -0.279410423    | 3.036041894        | -6.170166399 | 2.97E-08 | 1.18E-06         | 8.641799695 |
| RPRD2    | -0.270791913    | 5.607265704        | -6.203471839 | 2.58E-08 | 1.05E-06         | 8.623935324 |
| SMARCAL1 | -0.224481899    | 4.950116576        | -6.195991693 | 2.66E-08 | 1.07E-06         | 8.60682667  |
| ATXN7L1  | -0.602903391    | 2.932665118        | -6.148956518 | 3.25E-08 | 1.27E-06         | 8.582663541 |
| ALKBH4   | 0.354861468     | 3.186809218        | 6.150608191  | 3.23E-08 | 1.27E-06         | 8.571810598 |
| RPAP2    | -0.328922109    | 4.091635692        | -6.167227014 | 3.01E-08 | 1.20E-06         | 8.550438228 |
| INPP5E   | -0.334842441    | 3.158091339        | -6.143497723 | 3.32E-08 | 1.30E-06         | 8.541230107 |
| TMEM200B | -0.258360731    | 4.009529533        | -6.161371194 | 3.08E-08 | 1.22E-06         | 8.530151664 |
| TOM1L2   | -0.328128818    | 5.033688495        | -6.173468716 | 2.93E-08 | 1.17E-06         | 8.503340432 |
| KIAA1107 | -0.923146861    | 1.165641879        | -6.110304797 | 3.82E-08 | 1.48E-06         | 8.501190293 |
| C7orf26  | -0.284287499    | 4.501984284        | -6.163904136 | 3.05E-08 | 1.21E-06         | 8.497696378 |
| TBC1D22B | 0.26262019      | 3.409827416        | 6.134729891  | 3.45E-08 | 1.34E-06         | 8.461773478 |
| FOXL1    | 0.401074278     | 3.398806479        | 6.131839978  | 3.49E-08 | 1.35E-06         | 8.461603107 |
| NCOR2    | -0.227598606    | 8.212976303        | -6.156917979 | 3.14E-08 | 1.24E-06         | 8.44367065  |
| ZCCHC7   | -0.277973985    | 3.980274554        | -6.135207255 | 3.44E-08 | 1.34E-06         | 8.429310134 |
| ATG101   | 0.279533855     | 4.779394231        | 6.132417236  | 3.48E-08 | 1.35E-06         | 8.354074363 |
| STX3     | 0.373800535     | 3.958574505        | 6.099489446  | 4.00E-08 | 1.54E-06         | 8.268938866 |
| TEX30    | 0.309982855     | 2.920081479        | 6.073764221  | 4.46E-08 | 1.70E-06         | 8.265962171 |
| MED9     | 0.311235719     | 3.623477448        | 6.084961067  | 4.25E-08 | 1.63E-06         | 8.262062024 |
| ZNF823   | 0.568597863     | 1.005880837        | 6.052736371  | 4.87E-08 | 1.83E-06         | 8.244423009 |
| ZNF628   | -0.465363669    | 3.163344876        | -6.080078022 | 4.34E-08 | 1.66E-06         | 8.240119514 |
| CENPJ    | -0.521889002    | 1.91982366         | -6.045711472 | 5.02E-08 | 1.87E-06         | 8.219047674 |
| GNL2     | 0.353371838     | 6.088498473        | 6.105764785  | 3.90E-08 | 1.50E-06         | 8.203554429 |
| BICRA    | -0.352637499    | 3.558719552        | -6.065841814 | 4.61E-08 | 1.75E-06         | 8.185758685 |
| PLAUR    | 0.346483313     | 4.844504989        | 6.091033472  | 4.15E-08 | 1.59E-06         | 8.17263447  |
| RCL1     | 0.28416367      | 2.936356001        | 6.049015023  | 4.95E-08 | 1.85E-06         | 8.14233559  |
| ZNF22    | -0.328622346    | 3.016641806        | -6.048711727 | 4.95E-08 | 1.85E-06         | 8.124928409 |
| SECISBP2 | 0.367404823     | 3.906961133        | 6.052990485  | 4.87E-08 | 1.83E-06         | 8.098400482 |
| CCP110   | -0.488761031    | 3.333904423        | -6.033702624 | 5.28E-08 | 1.96E-06         | 8.085567413 |
| ANKRD34A | 0.824130034     | 1.725401346        | 5.998708331  | 6.11E-08 | 2.21E-06         | 8.058497433 |
| RFXAP    | -0.370502583    | 2.021121426        | -6.009468108 | 5.84E-08 | 2.12E-06         | 8.051142395 |
| NUPL2    | -0.289339323    | 3.160990433        | -6.03008569  | 5.36E-08 | 1.98E-06         | 8.048791609 |
| H3F3B    | 0.251411475     | 7.944467256        | 6.056991142  | 4.78E-08 | 1.81E-06         | 8.034189137 |
| NR2C1    | -0.267997582    | 3.717051062        | -6.028273984 | 5.40E-08 | 1.99E-06         | 8.01410662  |
| CEBPD    | -0.719277638    | 5.811572083        | -6.059092948 | 4.74E-08 | 1.80E-06         | 8.012448331 |
| TRMT1L   | -0.3965664      | 3.999700328        | -6.020722337 | 5.57E-08 | 2.04E-06         | 7.997720793 |
| SETDB2   | -0.379580778    | 4.11860496         | -6.033785067 | 5.27E-08 | 1.96E-06         | 7.997022026 |
| NOD1     | 0.438359319     | 2.621129408        | 5.993005288  | 6.26E-08 | 2.26E-06         | 7.941784523 |
| USP20    | -0.236330191    | 4.269455515        | -6.019047996 | 5.61E-08 | 2.05E-06         | 7.929548415 |
| HS6ST1   | 0.36552456      | 4.628138271        | 6.027493549  | 5.42E-08 | 1.99E-06         | 7.923501853 |
| TUBB6    | -0.30692253     | 8.062682417        | -6.029192323 | 5.38E-08 | 1.99E-06         | 7.909421565 |
| SUDS3    | -0.234077222    | 4.456171382        | -6.018716956 | 5.62E-08 | 2.05E-06         | 7.90856586  |
| EN1      | -0.415249775    | 4.135486645        | -6.014282099 | 5.72E-08 | 2.08E-06         | 7.907184494 |
| GFOD2    | 0.233395998     | 4.193608722        | 5.994851007  | 6.21E-08 | 2.24E-06         | 7.842762376 |
| RELT     | 0.719277898     | 0.575787618        | 5.945524018  | 7.63E-08 | 2.69E-06         | 7.841881083 |

| Gene     | Log fold change | Average Expression | t            | P-value  | Adjusted P-value | B           |
|----------|-----------------|--------------------|--------------|----------|------------------|-------------|
| OSBPL7   | -0.510320716    | 1.54037571         | -5.930903346 | 8.11E-08 | 2.86E-06         | 7.783701558 |
| ZNF526   | 0.373650071     | 4.429586494        | 5.984035012  | 6.50E-08 | 2.34E-06         | 7.774862073 |
| TCEANC2  | -0.408922454    | 2.99316318         | -5.94708791  | 7.58E-08 | 2.69E-06         | 7.772604981 |
| ZNF618   | -0.533252969    | 4.983832803        | -5.970794441 | 6.87E-08 | 2.46E-06         | 7.694617614 |
| ELMO2    | -0.178711929    | 5.313864093        | -5.96570437  | 7.02E-08 | 2.51E-06         | 7.652907029 |
| SH3PXD2B | -0.457324693    | 8.009816068        | -5.961714646 | 7.13E-08 | 2.55E-06         | 7.63042928  |
| REEP4    | -0.402931102    | 3.368425212        | -5.91817623  | 8.56E-08 | 2.97E-06         | 7.625447488 |
| FANCL    | -0.424254356    | 1.968525052        | -5.90095689  | 9.19E-08 | 3.16E-06         | 7.623062755 |
| SMAP2    | -0.246474342    | 4.984677174        | -5.95575544  | 7.31E-08 | 2.60E-06         | 7.621406491 |
| RIOX1    | 0.281885698     | 3.384309151        | 5.926431237  | 8.27E-08 | 2.89E-06         | 7.621328745 |
| FGFR10P2 | -0.224999503    | 4.627467101        | -5.952463168 | 7.42E-08 | 2.63E-06         | 7.615629258 |
| TNFAlP3  | -0.730747056    | 2.552029645        | -5.902500075 | 9.14E-08 | 3.14E-06         | 7.613381997 |
| ZNF318   | -0.403864337    | 5.026761088        | -5.946439507 | 7.60E-08 | 2.69E-06         | 7.591716953 |
| ANKRD26  | -0.408568961    | 3.005540625        | -5.897741249 | 9.32E-08 | 3.19E-06         | 7.543751342 |
| DLX3     | 1.089160926     | 0.578335009        | 5.868983915  | 1.05E-07 | 3.56E-06         | 7.534854927 |
| KDM4A    | -0.270556855    | 5.247918199        | -5.926787801 | 8.26E-08 | 2.89E-06         | 7.496570299 |
| ZBTB17   | 0.324389464     | 4.323365836        | 5.914421845  | 8.69E-08 | 3.01E-06         | 7.492892858 |
| ZNF274   | -0.420486741    | 2.771523423        | -5.880855648 | 1.00E-07 | 3.40E-06         | 7.478705098 |
| CSTF2T   | -0.242598185    | 5.57503419         | -5.925149353 | 8.31E-08 | 2.90E-06         | 7.475176316 |
| ARHGAP12 | -0.367175404    | 5.939040469        | -5.928203993 | 8.21E-08 | 2.88E-06         | 7.474908304 |
| ATF7IP   | -0.42964193     | 5.766297775        | -5.922491472 | 8.40E-08 | 2.92E-06         | 7.46021199  |
| PPP2CA   | 0.187203126     | 6.51490808         | 5.913399727  | 8.73E-08 | 3.02E-06         | 7.410442583 |
| TRPS1    | -0.535096654    | 5.598755458        | -5.904728613 | 9.05E-08 | 3.12E-06         | 7.395892471 |
| KIAA0355 | -0.516550282    | 4.217981293        | -5.880903041 | 1.00E-07 | 3.40E-06         | 7.350422083 |
| ZSCAN22  | 0.430255755     | 2.004884147        | 5.818182847  | 1.30E-07 | 4.34E-06         | 7.314485559 |
| RHOQ     | 0.132155576     | 6.61766176         | 5.886686972  | 9.76E-08 | 3.33E-06         | 7.301768814 |
| DGCR11   | 0.502737329     | 0.903559522        | 5.806791089  | 1.36E-07 | 4.49E-06         | 7.294597082 |
| GATA2    | 0.626335996     | 3.218539868        | 5.8342394    | 1.21E-07 | 4.09E-06         | 7.252680556 |
| ZNF438   | -0.369433172    | 2.952847858        | -5.807012355 | 1.36E-07 | 4.49E-06         | 7.170495059 |
| ZNF616   | 0.518444065     | 3.501483294        | 5.802818443  | 1.38E-07 | 4.56E-06         | 7.166020338 |
| MTPAP    | 0.317492104     | 3.844427183        | 5.817228242  | 1.30E-07 | 4.34E-06         | 7.140244166 |
| CREBZF   | 0.546057853     | 3.287571038        | 5.799570433  | 1.40E-07 | 4.61E-06         | 7.137305235 |
| RBM47    | -0.796092405    | 1.076591594        | -5.758568376 | 1.66E-07 | 5.33E-06         | 7.111646305 |
| IER5L    | 0.510493448     | 5.5983292          | 5.836816048  | 1.20E-07 | 4.06E-06         | 7.103649807 |
| ZNF630   | -0.488690232    | 0.455592206        | -5.755897282 | 1.68E-07 | 5.38E-06         | 7.096890017 |
| TARS2    | -0.372910596    | 3.502339906        | -5.799000567 | 1.40E-07 | 4.61E-06         | 7.083468986 |
| SNX33    | -0.177770116    | 6.669118481        | -5.828408635 | 1.24E-07 | 4.18E-06         | 7.065590264 |
| PANK1    | 0.664605987     | 2.497608233        | 5.752173694  | 1.71E-07 | 5.45E-06         | 7.063474259 |
| MLL10    | -0.477857368    | 3.506491821        | -5.781766424 | 1.51E-07 | 4.93E-06         | 7.061821546 |
| ETF1     | 0.261856263     | 7.215437237        | 5.825182419  | 1.26E-07 | 4.23E-06         | 7.056853028 |
| CDYL     | -0.237649251    | 4.688611142        | -5.808374567 | 1.35E-07 | 4.48E-06         | 7.039761566 |
| CDAN1    | -0.307448076    | 3.340838434        | -5.772686622 | 1.57E-07 | 5.07E-06         | 7.032714244 |
| BCL6     | -0.512119289    | 5.938922774        | -5.81753641  | 1.30E-07 | 4.34E-06         | 7.022388936 |
| PPIL2    | -0.204911951    | 4.938324037        | -5.808580775 | 1.35E-07 | 4.48E-06         | 7.021929731 |
| MAFK     | 0.340281374     | 3.740487341        | 5.782036234  | 1.51E-07 | 4.93E-06         | 6.973056424 |
| ZC3H4    | -0.287133643    | 4.74804751         | -5.77868339  | 1.53E-07 | 4.98E-06         | 6.924357708 |
| FAM60A   | 0.861402526     | 0.758019895        | 5.709706072  | 2.03E-07 | 6.34E-06         | 6.915650613 |
| ZNF24    | -0.322209008    | 5.368994903        | -5.776757885 | 1.54E-07 | 5.01E-06         | 6.874299677 |
| SLC12A4  | -0.186255964    | 6.265771077        | -5.774860023 | 1.55E-07 | 5.04E-06         | 6.849368445 |
| MED12    | -0.309560664    | 5.456873407        | -5.767313187 | 1.60E-07 | 5.17E-06         | 6.834273891 |
| UBTD2    | 0.219727446     | 6.235896702        | 5.767495005  | 1.60E-07 | 5.17E-06         | 6.82167928  |
| WTAP     | 0.249201304     | 6.414560728        | 5.763170369  | 1.63E-07 | 5.24E-06         | 6.802019923 |
| ZKSCAN2  | -0.491079865    | 3.02263463         | -5.715058907 | 1.99E-07 | 6.22E-06         | 6.800921654 |
| E2F6     | -0.296436875    | 2.67381161         | -5.71456876  | 1.99E-07 | 6.22E-06         | 6.798289505 |
| FZD2     | -0.353173735    | 4.40415785         | -5.731131826 | 1.86E-07 | 5.90E-06         | 6.767151915 |
| SERPINB9 | 0.603585944     | 1.529848247        | 5.672318697  | 2.37E-07 | 7.18E-06         | 6.762286854 |
| TRAFD1   | -0.188787816    | 4.982243166        | -5.739585502 | 1.80E-07 | 5.73E-06         | 6.746365232 |
| ZNF516   | -0.352226814    | 3.906706921        | -5.720731321 | 1.94E-07 | 6.11E-06         | 6.746140838 |
| MRM3     | 0.280837648     | 2.800009944        | 5.69374109   | 2.17E-07 | 6.71E-06         | 6.745057913 |
| DEPDC7   | 0.505915658     | 1.905784148        | 5.677010456  | 2.32E-07 | 7.07E-06         | 6.744330636 |
| CYCS     | 0.234992717     | 5.255552236        | 5.733726104  | 1.84E-07 | 5.86E-06         | 6.716115665 |
| RGS4     | -0.628038207    | 4.915745894        | -5.733161815 | 1.84E-07 | 5.86E-06         | 6.710642774 |
| IL6R     | 0.597689073     | 3.176895308        | 5.691544967  | 2.19E-07 | 6.75E-06         | 6.707208216 |
| SLC35G2  | 0.297291676     | 3.103047295        | 5.692475776  | 2.18E-07 | 6.73E-06         | 6.706472332 |
| ZNF114   | 1.506941501     | -1.686357682       | 5.840385802  | 1.18E-07 | 4.00E-06         | 6.674783893 |
| PAPD7    | 0.470727475     | 4.09578995         | 5.702987073  | 2.09E-07 | 6.49E-06         | 6.669302803 |
| AMBRA1   | -0.269048991    | 5.154805277        | -5.71932954  | 1.95E-07 | 6.13E-06         | 6.664120809 |
| SMURF2   | 0.429857602     | 5.204137854        | 5.722622216  | 1.93E-07 | 6.08E-06         | 6.652972136 |
| HDGFRP3  | 0.163809805     | 5.629198588        | 5.720867836  | 1.94E-07 | 6.11E-06         | 6.647103641 |
| MTM1     | -0.34641657     | 2.869952761        | -5.672338128 | 2.37E-07 | 7.18E-06         | 6.643252056 |

| Gene     | Log fold change | Average Expression | t            | P-value  | Adjusted P-value | B           |
|----------|-----------------|--------------------|--------------|----------|------------------|-------------|
| UBE2G2   | 0.172632546     | 6.180514168        | 5.72317482   | 1.92E-07 | 6.08E-06         | 6.642760599 |
| RFX1     | -0.324184191    | 3.721508768        | -5.679470188 | 2.30E-07 | 7.02E-06         | 6.633765595 |
| GPBP1L1  | -0.227972473    | 5.273572114        | -5.706805368 | 2.06E-07 | 6.40E-06         | 6.59990904  |
| C14orf79 | -0.447642823    | 2.453702151        | -5.648363043 | 2.62E-07 | 7.86E-06         | 6.585966855 |
| ABHD6    | -0.380624128    | 2.249233049        | -5.637064378 | 2.74E-07 | 8.20E-06         | 6.576767954 |
| LRRC59   | 0.182695357     | 7.573385441        | 5.694873673  | 2.16E-07 | 6.69E-06         | 6.536954486 |
| POLD3    | -0.314308107    | 3.910892564        | -5.66574609  | 2.43E-07 | 7.35E-06         | 6.533054859 |
| MYSM1    | 0.737914675     | 2.533777879        | 5.615912475  | 2.99E-07 | 8.82E-06         | 6.502662198 |
| SLC20A1  | 0.708127608     | 7.015763557        | 5.68616883   | 2.24E-07 | 6.88E-06         | 6.501057865 |
| PSMD6    | 0.213777301     | 5.801221867        | 5.683152927  | 2.27E-07 | 6.95E-06         | 6.490883529 |
| PPIF     | 0.422892023     | 5.894195507        | 5.682641048  | 2.27E-07 | 6.95E-06         | 6.481669504 |
| KLF4     | 0.257231615     | 6.567953487        | 5.681902103  | 2.28E-07 | 6.96E-06         | 6.475082294 |
| ZNF26    | 0.364064009     | 2.644310353        | 5.617000536  | 2.97E-07 | 8.80E-06         | 6.445448915 |
| NKX3-1   | 0.481710748     | 1.984296258        | 5.594667226  | 3.26E-07 | 9.46E-06         | 6.438144503 |
| INPPL1   | -0.219896613    | 6.102900878        | -5.670163352 | 2.39E-07 | 7.23E-06         | 6.428883966 |
| TXNDC9   | 0.205439333     | 4.550973891        | 5.652136523  | 2.57E-07 | 7.76E-06         | 6.427315798 |
| MLLT3    | -0.429956197    | 3.68347239         | -5.631836691 | 2.80E-07 | 8.35E-06         | 6.40627204  |
| ZNF71    | 0.357316809     | 2.979323064        | 5.607083754  | 3.10E-07 | 9.09E-06         | 6.401516963 |
| ULK3     | 0.325022197     | 3.063418268        | 5.603619563  | 3.14E-07 | 9.17E-06         | 6.386187144 |
| SIX1     | 0.606568189     | 3.822617765        | 5.62083034   | 2.93E-07 | 8.68E-06         | 6.383791725 |
| VIPAS39  | -0.319845367    | 4.662199395        | -5.636612982 | 2.74E-07 | 8.20E-06         | 6.362767706 |
| RMDN2    | 0.291900072     | 3.372427097        | 5.608453074  | 3.08E-07 | 9.08E-06         | 6.360746603 |
| ZNF518A  | -0.580114823    | 2.499165623        | -5.582568745 | 3.42E-07 | 9.86E-06         | 6.340974868 |
| TCF7L2   | -0.357569917    | 5.198042049        | -5.641669662 | 2.69E-07 | 8.07E-06         | 6.336447803 |
| DOT1L    | 0.460325356     | 4.476610279        | 5.624830096  | 2.88E-07 | 8.57E-06         | 6.308836185 |
| MAST3    | -0.400816107    | 2.696501265        | -5.558757258 | 3.77E-07 | 1.07E-05         | 6.25623737  |
| GDI1     | -0.186581045    | 6.299324926        | -5.62102425  | 2.93E-07 | 8.68E-06         | 6.231057772 |
| SLC26A11 | -0.310634797    | 3.368765225        | -5.585025324 | 3.39E-07 | 9.78E-06         | 6.227413458 |
| MINDY1   | -0.260464948    | 3.508709087        | -5.586091061 | 3.38E-07 | 9.76E-06         | 6.220546114 |
| SERTAD2  | 0.396219325     | 7.328783091        | 5.606808403  | 3.10E-07 | 9.09E-06         | 6.192800063 |
| DUSP1    | -0.721846087    | 5.323536731        | -5.606676211 | 3.10E-07 | 9.09E-06         | 6.185063359 |
| PRDM2    | -0.465475162    | 5.27253688         | -5.602116039 | 3.16E-07 | 9.21E-06         | 6.176007449 |
| ZFP36    | -0.700723221    | 6.422503888        | -5.604941161 | 3.12E-07 | 9.14E-06         | 6.170290896 |
| DUSP2    | -0.880493726    | -0.26838837        | -5.513732941 | 4.53E-07 | 1.27E-05         | 6.167583087 |
| TBX5     | 0.631876371     | 4.166187214        | 5.565746618  | 3.67E-07 | 1.05E-05         | 6.157835114 |
| EIF5     | 0.403840317     | 7.200811647        | 5.600320973  | 3.18E-07 | 9.26E-06         | 6.152633393 |
| RHOT1    | -0.246985331    | 4.183217683        | -5.571876045 | 3.58E-07 | 1.03E-05         | 6.126211646 |
| SFSWAP   | 0.303124541     | 4.597467121        | 5.572516182  | 3.57E-07 | 1.03E-05         | 6.125859484 |
| FAS      | 0.209381052     | 5.41049368         | 5.58737645   | 3.36E-07 | 9.73E-06         | 6.111488162 |
| RRN3     | 0.391354532     | 4.325944307        | 5.568527296  | 3.63E-07 | 1.04E-05         | 6.108467087 |
| YEATS2   | -0.420885586    | 4.362742991        | -5.54265505  | 4.03E-07 | 1.15E-05         | 6.042081858 |
| TBX2     | 0.467933737     | 3.538872063        | 5.53101497   | 4.23E-07 | 1.20E-05         | 6.028036089 |
| SUB1     | 0.134271199     | 7.05204874         | 5.568715175  | 3.62E-07 | 1.04E-05         | 6.025082129 |
| HINFP    | 0.361370495     | 2.570932666        | 5.489838113  | 5.00E-07 | 1.39E-05         | 5.989590008 |
| METTL1   | 0.275908096     | 3.599979171        | 5.516185263  | 4.49E-07 | 1.26E-05         | 5.971334203 |
| GPATCH2  | 0.375856246     | 3.261007123        | 5.503808776  | 4.72E-07 | 1.32E-05         | 5.940229033 |
| TCF20    | -0.329788786    | 5.287808616        | -5.538810196 | 4.09E-07 | 1.16E-05         | 5.940136196 |
| RNF34    | -0.219860439    | 4.164322973        | -5.512684377 | 4.55E-07 | 1.28E-05         | 5.920386214 |
| WBP4     | 0.207077718     | 3.816927692        | 5.517041694  | 4.47E-07 | 1.26E-05         | 5.919375198 |
| LINS1    | 0.448968066     | 1.947173532        | 5.447781031  | 5.93E-07 | 1.61E-05         | 5.87346747  |
| SOX8     | 1.297042623     | -0.510047906       | 5.461131343  | 5.62E-07 | 1.53E-05         | 5.87043448  |
| THRA     | -0.173582431    | 6.263442811        | -5.527817823 | 4.28E-07 | 1.21E-05         | 5.861991683 |
| GAN      | 0.369617378     | 2.961718492        | 5.473349706  | 5.34E-07 | 1.47E-05         | 5.855237426 |
| PLD6     | -0.428305193    | 0.803772793        | -5.435216442 | 6.24E-07 | 1.68E-05         | 5.838394362 |
| CCDC117  | 0.265667717     | 4.966505348        | 5.506935077  | 4.66E-07 | 1.30E-05         | 5.834930912 |
| RNF216P1 | 0.244313965     | 3.292139692        | 5.475793638  | 5.29E-07 | 1.46E-05         | 5.830826868 |
| BLOC1S4  | 0.248166587     | 3.532735878        | 5.481693657  | 5.17E-07 | 1.43E-05         | 5.822244539 |
| ARHGAP32 | -0.391365835    | 4.382400406        | -5.491350809 | 4.97E-07 | 1.38E-05         | 5.798281738 |
| FAM46A   | -0.511526196    | 6.475562028        | -5.509697939 | 4.61E-07 | 1.29E-05         | 5.789664326 |
| DLC1     | -0.560649953    | 6.82414642         | -5.503133208 | 4.73E-07 | 1.32E-05         | 5.7876375   |
| PIP5K1A  | 0.415559172     | 5.240849492        | 5.485690093  | 5.08E-07 | 1.41E-05         | 5.706830426 |
| MIR22HG  | 0.392828199     | 4.512902585        | 5.472776971  | 5.36E-07 | 1.47E-05         | 5.691157617 |
| CHD1     | 0.507828735     | 4.706783403        | 5.468597289  | 5.45E-07 | 1.49E-05         | 5.671611339 |
| ZNF624   | 0.495426941     | 2.053607115        | 5.390611524  | 7.47E-07 | 1.98E-05         | 5.667981908 |
| ZNF512   | -0.256852356    | 3.549047362        | -5.437193455 | 6.19E-07 | 1.67E-05         | 5.657693396 |
| HMOX1    | 0.56407324      | 9.028612763        | 5.462481681  | 5.58E-07 | 1.53E-05         | 5.656255237 |
| TMUB2    | -0.17842168     | 5.206427672        | -5.462638203 | 5.58E-07 | 1.53E-05         | 5.624306438 |
| CEP104   | -0.264353277    | 4.299529609        | -5.441578875 | 6.08E-07 | 1.65E-05         | 5.607663872 |
| ZNF442   | 0.920243874     | -0.303613108       | 5.397689006  | 7.26E-07 | 1.94E-05         | 5.588786596 |
| FLYWCH1  | -0.324237787    | 5.64940981         | -5.44501673  | 5.99E-07 | 1.63E-05         | 5.542617455 |



| Gene    | Log fold change | Average Expression | t            | P-value  | Adjusted P-value | B           |
|---------|-----------------|--------------------|--------------|----------|------------------|-------------|
| ULK1    | -0.251041086    | 5.493694662        | -5.443597133 | 6.03E-07 | 1.64E-05         | 5.540006887 |
| RWDD2A  | 0.334176199     | 2.96371086         | 5.389446018  | 7.50E-07 | 1.98E-05         | 5.534900881 |
| ANKRD46 | 0.458458882     | 2.306768314        | 5.356035293  | 8.59E-07 | 2.25E-05         | 5.511055822 |
| CEP152  | -0.720902485    | 0.430563388        | -5.341175103 | 9.11E-07 | 2.36E-05         | 5.502021578 |
| PPP4R2  | 0.272418297     | 5.013655155        | 5.427170701  | 6.44E-07 | 1.74E-05         | 5.500291712 |
| CCDC51  | 0.346468018     | 3.648749669        | 5.395150928  | 7.33E-07 | 1.95E-05         | 5.489937476 |
| POLR3E  | -0.214266335    | 4.343546975        | -5.40382846  | 7.08E-07 | 1.90E-05         | 5.463408785 |
| UTP11   | 0.258038012     | 5.252457424        | 5.419973307  | 6.63E-07 | 1.78E-05         | 5.461743781 |
| ASTE1   | 0.406853177     | 2.723857705        | 5.353112346  | 8.69E-07 | 2.27E-05         | 5.450092838 |
| TRIM47  | 0.484773215     | 4.790896977        | 5.402720384  | 7.11E-07 | 1.90E-05         | 5.437232763 |
| HOMEZ   | 0.442324601     | 3.145431146        | 5.346769484  | 8.91E-07 | 2.32E-05         | 5.419993167 |
| STXBP1  | -0.194900549    | 5.733201176        | -5.409986504 | 6.91E-07 | 1.85E-05         | 5.405729125 |
| PAIP1   | 0.177329846     | 4.803875652        | 5.395932508  | 7.31E-07 | 1.95E-05         | 5.391395338 |
| KAT6B   | -0.331289857    | 4.998370542        | -5.395112329 | 7.33E-07 | 1.95E-05         | 5.377717539 |
| GORASP2 | 0.144720406     | 7.336600742        | 5.393144877  | 7.39E-07 | 1.96E-05         | 5.336038387 |
| SYNRG   | -0.420971291    | 4.89074306         | -5.378427232 | 7.84E-07 | 2.07E-05         | 5.334259136 |
| CNOT10  | -0.180758154    | 4.394555074        | -5.374899966 | 7.96E-07 | 2.09E-05         | 5.332655148 |
| GTF2E1  | 0.399560603     | 2.726426225        | 5.314463651  | 1.01E-06 | 2.60E-05         | 5.310335699 |
| TMEM206 | -0.357487803    | 1.768168692        | -5.296477834 | 1.09E-06 | 2.77E-05         | 5.3075952   |
| IRX2    | 0.392159412     | 3.976060363        | 5.35659354   | 8.57E-07 | 2.25E-05         | 5.294476288 |
| STX6    | 0.216721407     | 5.570593247        | 5.374967828  | 7.96E-07 | 2.09E-05         | 5.272031337 |
| AXIN2   | -0.411176828    | 3.655024932        | -5.339401898 | 9.18E-07 | 2.37E-05         | 5.259729927 |
| SHOX2   | -0.340799575    | 3.978008705        | -5.344132796 | 9.01E-07 | 2.34E-05         | 5.250133715 |
| RCOR2   | -0.538157899    | 1.695706982        | -5.270410659 | 1.21E-06 | 3.04E-05         | 5.245253047 |
| KMT5C   | 0.756000244     | 0.721125176        | 5.274663923  | 1.19E-06 | 3.00E-05         | 5.240457726 |
| F3      | -0.868383083    | 2.902619591        | -5.339831955 | 9.16E-07 | 2.37E-05         | 5.225497328 |
| DDX20   | 0.253294439     | 4.389039194        | 5.345397792  | 8.96E-07 | 2.33E-05         | 5.215395973 |
| CD274   | -0.793480867    | -0.227743443       | -5.262287739 | 1.25E-06 | 3.10E-05         | 5.211587782 |
| CHTF8   | -0.275796485    | 5.57513826         | -5.354862046 | 8.63E-07 | 2.26E-05         | 5.196809017 |
| TTC33   | -0.424953603    | 2.747521737        | -5.279874663 | 1.17E-06 | 2.95E-05         | 5.173102814 |
| PRIM1   | -0.404641281    | 1.735738425        | -5.264120718 | 1.24E-06 | 3.08E-05         | 5.164462456 |
| PQLC2   | 0.30047963      | 4.348662282        | 5.324969289  | 9.73E-07 | 2.50E-05         | 5.158647628 |
| TIAM2   | -0.47939323     | 2.192357253        | -5.26185016  | 1.25E-06 | 3.10E-05         | 5.123277535 |
| TTC31   | -0.262619403    | 3.697092878        | -5.308739272 | 1.04E-06 | 2.66E-05         | 5.119939855 |
| PHRF1   | 0.20974471      | 5.575125458        | 5.333367623  | 9.40E-07 | 2.43E-05         | 5.109617672 |
| RBM5    | -0.353932016    | 4.582961735        | -5.324657834 | 9.74E-07 | 2.50E-05         | 5.109305481 |
| SLC19A2 | 0.447830546     | 2.550570471        | 5.275763792  | 1.18E-06 | 2.99E-05         | 5.083958168 |
| GP5M1   | -0.224180876    | 5.830682005        | -5.324171193 | 9.76E-07 | 2.50E-05         | 5.068379468 |
| MTHFSD  | -0.279416507    | 3.04363448         | -5.259719219 | 1.26E-06 | 3.12E-05         | 5.035849997 |
| ZFP41   | -0.293675967    | 2.720366862        | -5.254021993 | 1.29E-06 | 3.19E-05         | 5.034473556 |
| PPHLN1  | 0.167194829     | 5.102630819        | 5.307184749  | 1.04E-06 | 2.67E-05         | 5.032315085 |
| TRMT44  | -0.301202493    | 2.18657261         | -5.22728291  | 1.44E-06 | 3.49E-05         | 5.014011195 |
| EED     | 0.228389146     | 3.678165261        | 5.271790688  | 1.20E-06 | 3.03E-05         | 5.012421568 |
| PMS2    | -0.410238272    | 2.802871586        | -5.242047731 | 1.36E-06 | 3.31E-05         | 4.997606273 |
| SIX4    | 0.472558484     | 3.898773199        | 5.269551955  | 1.21E-06 | 3.05E-05         | 4.989172703 |
| CALHM2  | -0.212258724    | 6.17092771         | -5.297354989 | 1.09E-06 | 2.77E-05         | 4.958641297 |
| FAM53B  | -0.199439255    | 4.256243005        | -5.268458846 | 1.22E-06 | 3.05E-05         | 4.957474415 |
| CBFA2T2 | -0.378017356    | 4.134847051        | -5.265029216 | 1.24E-06 | 3.08E-05         | 4.95652246  |
| ZCCHC4  | 0.434295029     | 2.225882084        | 5.209132677  | 1.55E-06 | 3.73E-05         | 4.945077281 |
| MAVS    | -0.325317099    | 6.665097431        | -5.293241547 | 1.10E-06 | 2.81E-05         | 4.93899269  |
| TRIAP1  | 0.222058977     | 4.994139952        | 5.283175733  | 1.15E-06 | 2.92E-05         | 4.937101278 |
| FLRT3   | -1.073647451    | 1.155685431        | -5.185487651 | 1.70E-06 | 4.07E-05         | 4.916941696 |
| AUTS2   | -0.37366907     | 5.056171247        | -5.269145102 | 1.22E-06 | 3.05E-05         | 4.902349377 |
| DPM1    | 0.270795532     | 4.725993392        | 5.264830923  | 1.24E-06 | 3.08E-05         | 4.895828595 |
| NET1    | 0.355157046     | 3.897992017        | 5.248279883  | 1.32E-06 | 3.25E-05         | 4.894229033 |
| PPP3CC  | -0.215389284    | 3.681963541        | -5.242501832 | 1.35E-06 | 3.31E-05         | 4.885000354 |
| MAP2K5  | -0.198622719    | 4.7442092          | -5.265309148 | 1.24E-06 | 3.08E-05         | 4.871775715 |
| CBLB    | 0.484623581     | 4.995698016        | 5.267719481  | 1.22E-06 | 3.06E-05         | 4.870031215 |
| PCTP    | 0.269891596     | 2.682131371        | 5.191570789  | 1.66E-06 | 3.98E-05         | 4.849978295 |
| ETV3    | 0.26744528      | 4.496259908        | 5.247879702  | 1.32E-06 | 3.25E-05         | 4.821539511 |
| TMEM39A | 0.301330001     | 5.1887841          | 5.249889657  | 1.31E-06 | 3.23E-05         | 4.799159127 |
| ECHDC1  | 0.117012781     | 5.840165235        | 5.245808827  | 1.34E-06 | 3.27E-05         | 4.763996928 |
| ZFP62   | 0.322013448     | 3.301138805        | 5.186631812  | 1.69E-06 | 4.05E-05         | 4.75671036  |
| UBE4B   | -0.183249909    | 6.423532279        | -5.238300801 | 1.38E-06 | 3.35E-05         | 4.725215088 |
| SOS1    | -0.373561148    | 6.210473769        | -5.235680124 | 1.39E-06 | 3.38E-05         | 4.716508681 |
| RARG    | -0.196086546    | 7.413476339        | -5.233541854 | 1.40E-06 | 3.41E-05         | 4.715500375 |
| PNO1    | 0.252388054     | 4.119826183        | 5.208110986  | 1.55E-06 | 3.74E-05         | 4.710545209 |
| PNPLA8  | 0.254354027     | 5.183917698        | 5.220301892  | 1.48E-06 | 3.58E-05         | 4.693038565 |
| SWT1    | -0.38105595     | 2.268514656        | -5.140365515 | 2.03E-06 | 4.73E-05         | 4.676867396 |
| EF5     | -0.242008153    | 5.314929253        | -5.217497439 | 1.49E-06 | 3.61E-05         | 4.671161952 |

| Gene     | Log fold change | Average Expression | t            | P-value  | Adjusted P-value | B           |
|----------|-----------------|--------------------|--------------|----------|------------------|-------------|
| WDR89    | 0.34773037      | 2.797425055        | 5.14591519   | 1.99E-06 | 4.65E-05         | 4.632719945 |
| ZNF480   | -0.269660207    | 3.823526492        | -5.173486705 | 1.78E-06 | 4.25E-05         | 4.609508617 |
| ZNF10    | 0.412142109     | 1.287591707        | 5.103843193  | 2.35E-06 | 5.34E-05         | 4.608627729 |
| ALG2     | 0.136152249     | 5.933632885        | 5.205010479  | 1.57E-06 | 3.78E-05         | 4.602903995 |
| BBS12    | 0.344601355     | 2.684669683        | 5.124537794  | 2.16E-06 | 4.97E-05         | 4.599849601 |
| CXCL2    | -1.638130104    | -1.964615805       | -5.162246621 | 1.86E-06 | 4.41E-05         | 4.587474938 |
| CARD6    | -0.292567068    | 4.86330035         | -5.17154494  | 1.79E-06 | 4.27E-05         | 4.52664858  |
| COQ8B    | -0.219748251    | 3.701211442        | -5.146813839 | 1.98E-06 | 4.64E-05         | 4.501706578 |
| PHF12    | 0.274831743     | 4.858206189        | 5.157758185  | 1.90E-06 | 4.48E-05         | 4.498967195 |
| ZSCAN2   | 0.323413761     | 1.922694579        | 5.08423992   | 2.53E-06 | 5.68E-05         | 4.498714348 |
| DUSP3    | 0.195023088     | 6.272464369        | 5.176151768  | 1.76E-06 | 4.21E-05         | 4.48586099  |
| TAX1BP1  | 0.110922789     | 7.188616512        | 5.172232014  | 1.79E-06 | 4.27E-05         | 4.476697047 |
| UBA3     | 0.15501904      | 5.229684686        | 5.162822394  | 1.86E-06 | 4.41E-05         | 4.460186774 |
| TXNIP    | 0.508807579     | 7.24926452         | 5.16679351   | 1.83E-06 | 4.35E-05         | 4.452150833 |
| SPICE1   | 0.368050106     | 2.016897998        | 5.08496402   | 2.53E-06 | 5.67E-05         | 4.451544948 |
| ACTRT3   | -0.330302338    | 1.971308034        | -5.081028856 | 2.57E-06 | 5.74E-05         | 4.434386178 |
| CRTC1    | -0.23670643     | 4.795920447        | -5.147638931 | 1.97E-06 | 4.64E-05         | 4.422356652 |
| CEP95    | 0.290115804     | 3.670280348        | 5.124892888  | 2.16E-06 | 4.97E-05         | 4.419621984 |
| PPFIBP2  | -0.275122429    | 4.100342424        | -5.131480803 | 2.10E-06 | 4.86E-05         | 4.41299936  |
| FAM193B  | 0.461595045     | 3.265370847        | 5.10039305   | 2.38E-06 | 5.39E-05         | 4.404655927 |
| SNAPC4   | -0.225753158    | 3.720390271        | -5.106751364 | 2.32E-06 | 5.28E-05         | 4.399156888 |
| VAPA     | 0.124849718     | 6.910609197        | 5.151454495  | 1.94E-06 | 4.59E-05         | 4.393059312 |
| CNOT2    | 0.177464482     | 5.741944057        | 5.149731384  | 1.96E-06 | 4.61E-05         | 4.393044392 |
| ELK1     | 0.175860724     | 5.884369928        | 5.147462284  | 1.97E-06 | 4.64E-05         | 4.382815028 |
| OSBPL2   | -0.167127154    | 4.771924155        | -5.134906903 | 2.07E-06 | 4.82E-05         | 4.3815716   |
| PNN      | 0.380377216     | 5.141509249        | 5.136440884  | 2.06E-06 | 4.79E-05         | 4.3734952   |
| FAM102A  | -0.18477412     | 6.609379449        | -5.145951739 | 1.99E-06 | 4.65E-05         | 4.369283849 |
| CHAC1    | -1.597327079    | 1.1046177          | -5.038229566 | 3.04E-06 | 6.62E-05         | 4.367980519 |
| DDX23    | -0.150596412    | 6.095195324        | -5.142688595 | 2.01E-06 | 4.69E-05         | 4.360258079 |
| XPO7     | -0.182545741    | 6.188878674        | -5.142598982 | 2.01E-06 | 4.69E-05         | 4.357293951 |
| AEBP2    | 0.242824248     | 4.326962876        | 5.123273678  | 2.17E-06 | 4.99E-05         | 4.353015828 |
| CPEB4    | -0.448941919    | 3.64603606         | -5.094683051 | 2.43E-06 | 5.50E-05         | 4.340687659 |
| PSPC1    | 0.24739015      | 4.557363479        | 5.114411394  | 2.25E-06 | 5.14E-05         | 4.335601979 |
| TRMO     | 0.305296739     | 3.071209632        | 5.085176733  | 2.52E-06 | 5.67E-05         | 4.330619327 |
| RL1D1    | 0.161204714     | 7.906585487        | 5.128194766  | 2.13E-06 | 4.92E-05         | 4.32789282  |
| TULP3    | -0.154325365    | 5.728374342        | -5.131682453 | 2.10E-06 | 4.86E-05         | 4.323740743 |
| EPHB4    | -0.202141181    | 6.292327357        | -5.132027908 | 2.10E-06 | 4.86E-05         | 4.317617699 |
| KLHDC2   | 0.148996152     | 4.782172718        | 5.120775472  | 2.19E-06 | 5.03E-05         | 4.317520901 |
| AGPAT4   | -0.326546475    | 4.109336602        | -5.099828667 | 2.38E-06 | 5.40E-05         | 4.31190311  |
| AASDH    | -0.428455663    | 2.623290751        | -5.054934482 | 2.84E-06 | 6.28E-05         | 4.305304307 |
| UFM1     | 0.201152992     | 6.118725012        | 5.117282565  | 2.22E-06 | 5.09E-05         | 4.264653977 |
| MPHOSPH8 | -0.335023751    | 5.147377378        | -5.107391045 | 2.31E-06 | 5.28E-05         | 4.253836467 |
| ZMYND8   | -0.297367273    | 4.160123733        | -5.086329423 | 2.51E-06 | 5.66E-05         | 4.251776792 |
| METTL13  | -0.200575369    | 5.27074638         | -5.102396811 | 2.36E-06 | 5.36E-05         | 4.236133273 |
| ZCCHC10  | 0.30995295      | 3.085304856        | 5.052233736  | 2.87E-06 | 6.34E-05         | 4.23578228  |
| MSX2     | 0.62819331      | 2.439421403        | 5.029855772  | 3.14E-06 | 6.81E-05         | 4.213690014 |
| ANKRA2   | -0.332913405    | 2.486144544        | -5.041782359 | 2.99E-06 | 6.55E-05         | 4.209558565 |
| MIER2    | 0.273257354     | 4.209717532        | 5.078013282  | 2.60E-06 | 5.80E-05         | 4.206950324 |
| TSC22D4  | -0.29441929     | 5.511434944        | -5.094172095 | 2.44E-06 | 5.50E-05         | 4.19775739  |
| PLEKHF2  | 0.375216859     | 3.218555619        | 5.04245778   | 2.99E-06 | 6.54E-05         | 4.181764974 |
| TTBK2    | -0.394681417    | 3.080830876        | -5.045293095 | 2.95E-06 | 6.48E-05         | 4.180366372 |
| PCNA     | 0.233691253     | 5.947349807        | 5.091911399  | 2.46E-06 | 5.54E-05         | 4.172298835 |
| CDCA8    | -0.569231183    | 1.85808182         | -4.988634183 | 3.69E-06 | 7.82E-05         | 4.157287392 |
| HMGCL    | -0.257486868    | 4.744770578        | -5.068586119 | 2.70E-06 | 6.01E-05         | 4.121841516 |
| FAM161B  | -0.239543724    | 2.68457292         | -5.006575732 | 3.44E-06 | 7.39E-05         | 4.108847406 |
| TECPR1   | -0.206035222    | 4.130324621        | -5.049232707 | 2.91E-06 | 6.40E-05         | 4.095814561 |
| ZNF100   | -0.569707142    | 1.680822552        | -4.969285326 | 3.98E-06 | 8.34E-05         | 4.087859263 |
| PLCG1    | -0.174585427    | 5.692114975        | -5.067781031 | 2.70E-06 | 6.03E-05         | 4.081572785 |
| TIMM17A  | 0.214991038     | 5.23301039         | 5.058339124  | 2.81E-06 | 6.22E-05         | 4.072771818 |
| PIP5K1C  | -0.179284638    | 7.316712773        | -5.064537388 | 2.74E-06 | 6.08E-05         | 4.066823156 |
| BNIP2    | 0.248747866     | 5.977886095        | 5.065570644  | 2.73E-06 | 6.07E-05         | 4.065969987 |
| SMARCD2  | -0.136998886    | 5.813709675        | -5.060579675 | 2.78E-06 | 6.17E-05         | 4.053182562 |
| SEH1L    | 0.291663725     | 5.243595622        | 5.051186615  | 2.89E-06 | 6.36E-05         | 4.051128576 |
| SYNJ1    | -0.467408882    | 3.098938354        | -4.995800395 | 3.59E-06 | 7.64E-05         | 4.04740586  |
| BRSK1    | -0.556292641    | 0.551035531        | -4.940220227 | 4.45E-06 | 9.25E-05         | 4.038652713 |
| PHC2     | 0.234423732     | 6.700155936        | 5.057452208  | 2.82E-06 | 6.23E-05         | 4.033428749 |
| DBP      | -0.363892961    | 2.99976443         | -4.99618371  | 3.58E-06 | 7.64E-05         | 4.029133754 |
| RPU5D2   | 0.252448845     | 3.381368965        | 5.00292013   | 3.49E-06 | 7.47E-05         | 4.010359042 |
| ZCCHC3   | 0.201722441     | 4.431519196        | 5.029882847  | 3.14E-06 | 6.81E-05         | 4.002238192 |
| DDAH1    | 0.22967834      | 7.17706387         | 5.045637191  | 2.95E-06 | 6.48E-05         | 3.987309095 |

| Gene      | Log fold change | Average Expression | t            | P-value  | Adjusted P-value | B           |
|-----------|-----------------|--------------------|--------------|----------|------------------|-------------|
| C17orf80  | -0.309727859    | 3.378771202        | -4.988517758 | 3.69E-06 | 7.82E-05         | 3.985312783 |
| ZSWIM4    | -0.321319583    | 2.884271624        | -5.002371448 | 3.49E-06 | 7.47E-05         | 3.980029991 |
| RNF115    | 0.158469084     | 6.04159249         | 5.040994088  | 3.00E-06 | 6.56E-05         | 3.972280741 |
| COPS4     | 0.117042435     | 5.587945508        | 5.036415022  | 3.06E-06 | 6.66E-05         | 3.970191605 |
| ZNF330    | 0.193652781     | 4.792549649        | 5.018428071  | 3.28E-06 | 7.11E-05         | 3.931627624 |
| FRMD6     | 0.609288744     | 8.116846773        | 5.014597228  | 3.33E-06 | 7.21E-05         | 3.912814103 |
| RRS1      | 0.322475525     | 4.733177432        | 5.011947252  | 3.37E-06 | 7.27E-05         | 3.908888907 |
| NANP      | 0.443165386     | 3.714574901        | 4.990831545  | 3.66E-06 | 7.78E-05         | 3.907808003 |
| RECQL5    | -0.256114776    | 3.005568504        | -4.968656094 | 3.99E-06 | 8.35E-05         | 3.898476706 |
| DUSP6     | -0.494242646    | 4.819377349        | -5.010055935 | 3.39E-06 | 7.31E-05         | 3.878674935 |
| COPS2     | 0.10976785      | 7.147510258        | 5.01185038   | 3.37E-06 | 7.27E-05         | 3.864188205 |
| RBM3      | 0.217272115     | 7.082893927        | 5.008501506  | 3.41E-06 | 7.34E-05         | 3.846349983 |
| CBWD1     | 0.367990553     | 1.573951505        | 4.902745691  | 5.15E-06 | 0.000104844      | 3.845441148 |
| SLC25A42  | -0.318661047    | 2.120043608        | -4.924355065 | 4.74E-06 | 9.73E-05         | 3.845089425 |
| SDC4      | 0.320550149     | 7.390911002        | 5.004937934  | 3.46E-06 | 7.42E-05         | 3.836613279 |
| STPG1     | -0.504136145    | 2.089099174        | -4.920612679 | 4.81E-06 | 9.85E-05         | 3.825816691 |
| LSM14A    | 0.124248185     | 6.600632423        | 5.002761337  | 3.49E-06 | 7.47E-05         | 3.823505204 |
| CBARP     | 0.432955274     | 2.767527913        | 4.942725291  | 4.41E-06 | 9.19E-05         | 3.813561153 |
| TM2D3     | 0.199515833     | 4.605651352        | 4.979898308  | 3.82E-06 | 8.05E-05         | 3.800780496 |
| ZFP36L2   | 0.431990108     | 8.211334793        | 4.983942056  | 3.76E-06 | 7.95E-05         | 3.795397942 |
| ZBTB8A    | 0.254669811     | 3.372687839        | 4.940483164  | 4.45E-06 | 9.25E-05         | 3.792689787 |
| UBE2N     | 0.166546169     | 5.730685474        | 4.988362985  | 3.69E-06 | 7.82E-05         | 3.785272816 |
| SLC2A1    | 0.437298194     | 4.850747086        | 4.973772576  | 3.91E-06 | 8.22E-05         | 3.781688625 |
| GPAT3     | 0.912039731     | -0.90799554        | 4.895655369  | 5.29E-06 | 0.000107619      | 3.777451675 |
| SPG20     | 0.12927797      | 7.214586345        | 4.982697467  | 3.77E-06 | 7.97E-05         | 3.758547076 |
| NOP58     | 0.243141578     | 5.420869146        | 4.974399923  | 3.90E-06 | 8.21E-05         | 3.746398259 |
| FASTKD2   | 0.235151634     | 4.684228162        | 4.958604922  | 4.15E-06 | 8.65E-05         | 3.729038933 |
| MMACHC    | -0.329528219    | 2.601503701        | -4.890783015 | 5.39E-06 | 0.000109409      | 3.717547574 |
| TRIM32    | 0.291721719     | 5.178829829        | 4.964165829  | 4.06E-06 | 8.48E-05         | 3.71381938  |
| CIRBP     | 0.299022408     | 6.942349626        | 4.97138216   | 3.94E-06 | 8.29E-05         | 3.707657536 |
| NELFA     | -0.200754735    | 4.168108146        | -4.939795445 | 4.46E-06 | 9.25E-05         | 3.705364895 |
| ZNF33A    | 0.2493561       | 3.864810401        | 4.934832321  | 4.55E-06 | 9.41E-05         | 3.702544268 |
| TUT1      | 0.331113122     | 2.333310399        | 4.873664156  | 5.76E-06 | 0.000115616      | 3.69398367  |
| ZMIZ2     | -0.172416606    | 5.812745499        | -4.96621998  | 4.02E-06 | 8.42E-05         | 3.693167313 |
| CASP10    | -0.376678552    | 2.302150551        | -4.88263316  | 5.57E-06 | 0.000112575      | 3.670165249 |
| YRDC      | -0.384660036    | 2.282296876        | -4.879562876 | 5.63E-06 | 0.000113614      | 3.629545109 |
| PIGW      | 0.357246097     | 3.010101968        | 4.876461927  | 5.70E-06 | 0.000114831      | 3.620403211 |
| WDR5      | -0.147273875    | 5.2201505          | -4.937973916 | 4.49E-06 | 9.31E-05         | 3.616805735 |
| DNAJA3    | -0.222059552    | 4.771610831        | -4.926839622 | 4.69E-06 | 9.66E-05         | 3.601885164 |
| ZNF567    | 0.335605794     | 2.241035735        | 4.848208257  | 6.36E-06 | 0.000124894      | 3.580225457 |
| ZFP2      | -0.800185291    | -0.631515057       | -4.82456936  | 6.97E-06 | 0.000135038      | 3.572976323 |
| HOXC4     | 0.514914797     | 2.046962249        | 4.836569707  | 6.65E-06 | 0.000129609      | 3.564346226 |
| AMPD2     | -0.198850105    | 5.663248499        | -4.928168052 | 4.67E-06 | 9.64E-05         | 3.55837742  |
| BRD8      | -0.221361491    | 4.753636132        | -4.911387049 | 4.98E-06 | 0.000101664      | 3.55223843  |
| HP1BP3    | 0.27626509      | 7.15547024         | 4.926537633  | 4.70E-06 | 9.66E-05         | 3.53756064  |
| ZKSCAN1   | -0.387819886    | 6.429767393        | -4.926654378 | 4.69E-06 | 9.66E-05         | 3.537102004 |
| TMCC2     | -0.45961657     | 1.883116238        | -4.820293928 | 7.08E-06 | 0.000137101      | 3.531453034 |
| RND3      | -0.396890667    | 7.878790764        | -4.916101092 | 4.89E-06 | 1.00E-04         | 3.528548988 |
| RAB11A    | 0.105515554     | 6.564792938        | 4.922960077  | 4.76E-06 | 9.77E-05         | 3.522322695 |
| GRAMD1B   | -0.463424144    | 3.200630889        | -4.872341508 | 5.79E-06 | 0.000116054      | 3.521568976 |
| PXMP4     | -0.278299578    | 3.190676768        | -4.869332918 | 5.86E-06 | 0.000116945      | 3.50880649  |
| TNFRSF12A | 0.51114587      | 6.06408896         | 4.918397853  | 4.85E-06 | 9.92E-05         | 3.506587102 |
| BDNF      | -0.57709853     | 2.966599867        | -4.883167518 | 5.56E-06 | 0.000112493      | 3.497744615 |
| OXNAD1    | -0.339399971    | 2.268654858        | -4.831579974 | 6.78E-06 | 0.000131783      | 3.483182343 |
| CXCL1     | -1.081361395    | 0.319690729        | -4.789440608 | 7.97E-06 | 0.000151234      | 3.478635674 |
| WDC1      | -0.159936908    | 6.328783586        | -4.910531642 | 5.00E-06 | 0.000101864      | 3.475971054 |
| RUNDC1    | 0.272876502     | 3.734394251        | 4.867771252  | 5.90E-06 | 0.000117342      | 3.470516491 |
| ZNF211    | 0.390831991     | 1.860854904        | 4.800730034  | 7.63E-06 | 0.000145927      | 3.462310463 |
| ALG13     | 0.197523332     | 4.065535617        | 4.874835804  | 5.74E-06 | 0.000115247      | 3.461200679 |
| ZFYVE28   | -0.309634511    | 2.71854907         | -4.832836984 | 6.75E-06 | 0.000131316      | 3.448819369 |
| MIIP      | -0.348369982    | 3.386265065        | -4.855168034 | 6.19E-06 | 0.000122223      | 3.448549852 |
| ANO8      | -0.357208207    | 2.579205456        | -4.840894767 | 6.54E-06 | 0.000128298      | 3.43079908  |
| ZNF143    | 0.195942814     | 3.808283012        | 4.859026124  | 6.10E-06 | 0.000121211      | 3.422872503 |
| ZSCAN30   | -0.246919983    | 3.271318211        | -4.840439708 | 6.55E-06 | 0.000128356      | 3.418446962 |
| PPP1R15A  | -0.398725674    | 6.371601883        | -4.890699369 | 5.40E-06 | 0.000109409      | 3.402767955 |
| ABCC10    | -0.243215434    | 4.031343186        | -4.858680002 | 6.11E-06 | 0.000121214      | 3.392374494 |
| NCKIPSD   | -0.232854745    | 3.784186763        | -4.850290577 | 6.31E-06 | 0.000124329      | 3.390153676 |
| SMAD7     | -0.239067336    | 4.36427296         | -4.870530699 | 5.83E-06 | 0.000116581      | 3.376008042 |
| TBC1D10B  | -0.169803223    | 6.10598866         | -4.882182344 | 5.58E-06 | 0.00011262       | 3.374197049 |
| CCDC127   | -0.191074642    | 5.073980381        | -4.870481245 | 5.84E-06 | 0.000116581      | 3.373872068 |

| Gene     | Log fold change | Average Expression | t            | P-value  | Adjusted P-value | B           |
|----------|-----------------|--------------------|--------------|----------|------------------|-------------|
| PDK2     | -0.209210205    | 4.648772209        | -4.868442698 | 5.88E-06 | 0.000117192      | 3.370138431 |
| IKBKB    | -0.201874155    | 4.138388389        | -4.856680983 | 6.15E-06 | 0.00012178       | 3.366546688 |
| C5orf30  | 0.397019592     | 3.22123045         | 4.829238751  | 6.84E-06 | 0.000132804      | 3.363064185 |
| CEP68    | -0.28326379     | 4.418249454        | -4.850061082 | 6.31E-06 | 0.000124329      | 3.356446198 |
| RNF114   | -0.144647035    | 6.07224011         | -4.87606023  | 5.71E-06 | 0.000114856      | 3.349831556 |
| BCL9     | -0.318804622    | 4.094703329        | -4.838064597 | 6.61E-06 | 0.000129199      | 3.335795161 |
| LSM11    | 0.453697706     | 2.549601979        | 4.784861239  | 8.11E-06 | 0.000153333      | 3.327757292 |
| ZNF226   | 0.261013155     | 3.280650477        | 4.814743754  | 7.23E-06 | 0.000139163      | 3.326031363 |
| KIF3C    | -0.324634842    | 4.98082714         | -4.856450523 | 6.16E-06 | 0.00012178       | 3.322115748 |
| IER2     | -0.500784105    | 4.53734825         | -4.858193634 | 6.12E-06 | 0.000121282      | 3.317052861 |
| RBM33    | -0.287094874    | 4.452201039        | -4.837225771 | 6.63E-06 | 0.00012945       | 3.277353266 |
| WDR91    | -0.287319692    | 2.691396339        | -4.781430306 | 8.22E-06 | 0.00015483       | 3.274462657 |
| BORCS5   | -0.300120457    | 3.271240499        | -4.801084985 | 7.62E-06 | 0.000145913      | 3.264813417 |
| LEMD2    | -0.171254187    | 4.858318767        | -4.839683351 | 6.57E-06 | 0.000128563      | 3.257439358 |
| ZBTB7A   | 0.221836738     | 6.778198068        | 4.848402866  | 6.35E-06 | 0.000124894      | 3.244576357 |
| ZNF284   | 0.704427317     | 0.303397103        | 4.713372249  | 1.07E-05 | 0.000192294      | 3.233913163 |
| ZSWIM6   | 0.389000703     | 3.109707887        | 4.795814736  | 7.78E-06 | 0.000148211      | 3.220468093 |
| USP2     | 0.634809592     | 0.081906327        | 4.706348604  | 1.09E-05 | 0.000196794      | 3.209145933 |
| TMEM63B  | -0.240855648    | 4.487301324        | -4.816741405 | 7.18E-06 | 0.00013863       | 3.201603178 |
| TLCD1    | 0.314311815     | 2.17816021         | 4.731880908  | 9.93E-06 | 0.000181819      | 3.19886717  |
| C22orf29 | 0.257821948     | 4.402367796        | 4.811834381  | 7.31E-06 | 0.000140548      | 3.17808788  |
| DCUN1D3  | -0.331817779    | 4.725073927        | -4.819881852 | 7.09E-06 | 0.000137142      | 3.165914664 |
| DGKD     | -0.350603401    | 2.708718347        | -4.752440035 | 9.18E-06 | 0.00016975       | 3.162816565 |
| SOCS1    | 0.697106496     | 1.54448754         | 4.703351224  | 1.11E-05 | 0.000198812      | 3.153256094 |
| KLHL12   | -0.161135635    | 4.599746151        | -4.80274738  | 7.57E-06 | 0.00014517       | 3.138405299 |
| KDM6A    | -0.544400157    | 3.557018223        | -4.765777672 | 8.73E-06 | 0.000163113      | 3.137867304 |
| CDC5L    | 0.137243068     | 5.669054364        | 4.816315995  | 7.19E-06 | 0.000138679      | 3.135619277 |
| GDF15    | 0.662635426     | 5.277656728        | 4.815694296  | 7.21E-06 | 0.000138833      | 3.125676305 |
| ZNF687   | -0.216763714    | 4.713311978        | -4.794036453 | 7.83E-06 | 0.000148779      | 3.109852337 |
| NAMPT    | 0.369243014     | 6.491049589        | 4.811334444  | 7.33E-06 | 0.000140639      | 3.109055568 |
| CH25H    | -0.54551413     | 4.342699748        | -4.782651842 | 8.18E-06 | 0.000154442      | 3.08845939  |
| VAR2     | -0.200988792    | 3.763764119        | -4.770243876 | 8.58E-06 | 0.000160749      | 3.085307288 |
| SENP5    | 0.25391743      | 4.539675576        | 4.7859186    | 8.08E-06 | 0.000152904      | 3.082140024 |
| BCL2L13  | -0.144396488    | 5.734815929        | -4.799727228 | 7.66E-06 | 0.000146304      | 3.073224604 |
| DZIP1L   | 0.379116106     | 1.967074763        | 4.694808246  | 1.14E-05 | 0.000204397      | 3.060015766 |
| PFKFB4   | -0.504858323    | 1.803417212        | -4.674475295 | 1.24E-05 | 0.000218456      | 3.058317952 |
| DAZAP2   | 0.129125612     | 7.425819358        | 4.794750104  | 7.81E-06 | 0.00014856       | 3.054374156 |
| TNPO3    | -0.130337411    | 5.984627984        | -4.795693041 | 7.78E-06 | 0.000148211      | 3.052987339 |
| ZSCAN25  | -0.291287645    | 3.384068857        | -4.746739756 | 9.39E-06 | 0.000173273      | 3.046238171 |
| OGT      | -0.345247593    | 5.176867683        | -4.774068232 | 8.45E-06 | 0.00015861       | 3.022136981 |
| SLC38A7  | -0.205041946    | 5.510646665        | -4.781343713 | 8.22E-06 | 0.00015483       | 3.015597705 |
| CABIN1   | -0.155400573    | 6.393439527        | -4.786499744 | 8.06E-06 | 0.000152756      | 3.014158329 |
| FLI1     | -0.281307128    | 3.071453523        | -4.715581241 | 1.06E-05 | 0.000190913      | 3.002866984 |
| HMGCR    | 0.709970782     | 6.877863802        | 4.779256689  | 8.29E-06 | 0.000155878      | 2.989334745 |
| SLC4A2   | -0.186635777    | 6.193424101        | -4.776444267 | 8.38E-06 | 0.00015737       | 2.977439358 |
| ZNF766   | 0.225480442     | 3.520778069        | 4.722019803  | 1.03E-05 | 0.000186963      | 2.972461291 |
| CCDC14   | -0.273821762    | 3.205299515        | -4.736279609 | 9.77E-06 | 0.000179449      | 2.968542258 |
| TXNDC11  | 0.169057178     | 5.054866074        | 4.761524544  | 8.87E-06 | 0.00016488       | 2.967377341 |
| LRIF1    | -0.23062213     | 3.627153635        | -4.728546401 | 1.01E-05 | 0.000183254      | 2.9668302   |
| DENND1A  | -0.201727989    | 5.088579226        | -4.765139072 | 8.75E-06 | 0.00016331       | 2.964679231 |
| TPST1    | 0.16368381      | 5.469395438        | 4.769590221  | 8.60E-06 | 0.000160951      | 2.96378952  |
| LTV1     | 0.313865997     | 4.09052415         | 4.742602612  | 9.54E-06 | 0.0001756        | 2.955692017 |
| PIK3C2B  | -0.555752623    | 1.576888022        | -4.647776216 | 1.37E-05 | 0.00023888       | 2.952536479 |
| IL11     | 0.759292995     | 0.213437919        | 4.633259534  | 1.44E-05 | 0.000250022      | 2.943788128 |
| ARHGEF7  | -0.218403214    | 5.415269136        | -4.761343236 | 8.88E-06 | 0.00016488       | 2.938598378 |
| WDR81    | -0.191232792    | 6.027287479        | -4.763370749 | 8.81E-06 | 0.000164011      | 2.933846846 |
| EHMT1    | -0.18060286     | 5.1063869          | -4.752493604 | 9.18E-06 | 0.00016975       | 2.933125551 |
| BLOC1S3  | 0.21879014      | 3.998903187        | 4.728942963  | 1.00E-05 | 0.000183199      | 2.930773688 |
| MIDN     | -0.29074108     | 6.055505755        | -4.763543413 | 8.80E-06 | 0.000164011      | 2.929398624 |
| EPOP     | 0.431080032     | 1.43303426         | 4.641304591  | 1.40E-05 | 0.000244226      | 2.919346657 |
| MSANTD3  | 0.146929178     | 5.643247655        | 4.753284051  | 9.15E-06 | 0.000169619      | 2.905476664 |
| BRD2     | 0.20952668      | 6.857142591        | 4.756056411  | 9.06E-06 | 0.000168039      | 2.904261016 |
| TRIM35   | 0.212394467     | 4.745762943        | 4.736614844  | 9.76E-06 | 0.000179439      | 2.896828719 |
| TMEM70   | 0.206558848     | 4.549988096        | 4.733719916  | 9.86E-06 | 0.00018084       | 2.893509171 |
| SALL1    | 0.589435922     | 3.364114991        | 4.684505343  | 1.19E-05 | 0.000211295      | 2.89183676  |
| DZANK1   | -0.551935981    | -0.091092223       | -4.613316669 | 1.56E-05 | 0.000265294      | 2.887503687 |
| FGD1     | -0.215696651    | 5.443223203        | -4.744514965 | 9.47E-06 | 0.000174537      | 2.884767352 |
| NUFIP1   | 0.284009916     | 2.95549316         | 4.691287256  | 1.16E-05 | 0.000206657      | 2.880274268 |
| KBTBD8   | -0.598594006    | -0.887965282       | -4.613296394 | 1.56E-05 | 0.000265294      | 2.879523174 |
| STX16    | -0.234287406    | 4.25782021         | -4.730233677 | 1.00E-05 | 0.000182521      | 2.87030833  |

| Gene      | Log fold change | Average Expression | t            | P-value  | Adjusted P-value | B           |
|-----------|-----------------|--------------------|--------------|----------|------------------|-------------|
| ZNF398    | 0.365206166     | 4.836544897        | 4.731203462  | 9.96E-06 | 0.000182068      | 2.867142325 |
| ELMOD3    | -0.255752859    | 2.856801377        | -4.681687144 | 1.20E-05 | 0.000213315      | 2.861697818 |
| BBS10     | -0.271560078    | 3.723600921        | -4.700670419 | 1.12E-05 | 0.00020037       | 2.861461813 |
| SLF1      | -0.465632315    | 1.421623919        | -4.616033193 | 1.54E-05 | 0.000263468      | 2.849707873 |
| STRIP1    | -0.249109519    | 4.804768653        | -4.72330395  | 1.03E-05 | 0.000186275      | 2.844592987 |
| NDE1      | -0.229940929    | 4.78411516         | -4.720676219 | 1.04E-05 | 0.000187696      | 2.843568236 |
| OSGEPL1   | -0.297126605    | 1.747334524        | -4.638004202 | 1.42E-05 | 0.000246738      | 2.841651837 |
| LONRF1    | 0.323049777     | 3.465584677        | 4.690573919  | 1.16E-05 | 0.000206973      | 2.837422033 |
| TRIM66    | -0.529373009    | 1.334224702        | -4.621496611 | 1.51E-05 | 0.000259573      | 2.832500093 |
| EFNB1     | 0.212862939     | 6.236242073        | 4.733616495  | 9.87E-06 | 0.00018084       | 2.823541128 |
| SNRPB2    | 0.249605057     | 5.497274187        | 4.725000912  | 1.02E-05 | 0.000185438      | 2.808828514 |
| PBDC1     | 0.241676035     | 4.693931979        | 4.710578404  | 1.08E-05 | 0.000193885      | 2.803063397 |
| PRPF40B   | -0.234530882    | 2.000630495        | -4.635236963 | 1.43E-05 | 0.000248734      | 2.794418608 |
| DIDO1     | -0.417734442    | 5.996408093        | -4.724802207 | 1.02E-05 | 0.000185438      | 2.791314071 |
| NR4A2     | -0.632261845    | 0.472193928        | -4.593341805 | 1.68E-05 | 0.000281203      | 2.775565673 |
| TXNRD1    | 0.348959635     | 8.063923037        | 4.712520935  | 1.07E-05 | 0.000192688      | 2.773537416 |
| TIMM29    | 0.207248916     | 3.419324617        | 4.667657868  | 1.27E-05 | 0.000223124      | 2.769411616 |
| SMIM15    | 0.119694034     | 5.731025582        | 4.716434374  | 1.05E-05 | 0.000190523      | 2.766198937 |
| SNAI1     | 0.454667341     | 3.442302807        | 4.688519127  | 1.17E-05 | 0.000208347      | 2.757442149 |
| ZNF547    | 0.494583891     | 0.614890244        | 4.575747104  | 1.79E-05 | 0.000296447      | 2.750814701 |
| USP54     | -0.332310675    | 2.422499853        | -4.624836098 | 1.49E-05 | 0.000256662      | 2.732268449 |
| AKNA      | -0.315982086    | 4.643417091        | -4.69262388  | 1.15E-05 | 0.000205855      | 2.729993663 |
| GRAMD1A   | -0.223853128    | 5.456938896        | -4.70087693  | 1.12E-05 | 0.00020037       | 2.715522799 |
| MFSD2A    | 0.54883388      | 1.234575099        | 4.606744416  | 1.60E-05 | 0.000270085      | 2.710586849 |
| PLEKHM1   | -0.150386152    | 5.4942437          | -4.698156571 | 1.13E-05 | 0.000202053      | 2.7087716   |
| SHROOM1   | -0.354095504    | 1.894744503        | -4.592087237 | 1.69E-05 | 0.000282089      | 2.687643949 |
| BLOC1S5   | -0.233409221    | 3.343203097        | -4.637982636 | 1.42E-05 | 0.000246738      | 2.684444444 |
| SZT2      | -0.380980166    | 4.669763821        | -4.670483687 | 1.25E-05 | 0.000221007      | 2.658490505 |
| RGP1      | -0.342352905    | 4.831183225        | -4.673919914 | 1.24E-05 | 0.00021866       | 2.656545941 |
| SPATS2    | -0.153773532    | 4.290155797        | -4.664368384 | 1.28E-05 | 0.000225657      | 2.656383889 |
| MBTD1     | -0.368884258    | 2.461789828        | -4.600809203 | 1.63E-05 | 0.000274948      | 2.651261952 |
| MORF4L2   | 0.137749899     | 7.707411731        | 4.676018065  | 1.23E-05 | 0.000217693      | 2.627351751 |
| NUDT4     | 0.243329437     | 4.009754181        | 4.647044314  | 1.37E-05 | 0.000239264      | 2.624966402 |
| SH3BP2    | -0.198494489    | 4.365007446        | -4.652534832 | 1.34E-05 | 0.000234894      | 2.616229898 |
| USP10     | 0.283954211     | 5.554497513        | 4.670800787  | 1.25E-05 | 0.000221         | 2.616080581 |
| TOR1A     | 0.127444741     | 5.902208806        | 4.675671743  | 1.23E-05 | 0.000217723      | 2.612988536 |
| RUBCNL    | 0.416369884     | 3.343656875        | 4.610931837  | 1.57E-05 | 0.000266854      | 2.587019326 |
| USP42     | 0.28304728      | 3.788652755        | 4.627676096  | 1.47E-05 | 0.000254758      | 2.576291414 |
| HNRNPA3   | 0.155481282     | 6.324227563        | 4.661596235  | 1.30E-05 | 0.000227772      | 2.557211606 |
| MORF4L1   | 0.100743916     | 6.980087633        | 4.659432387  | 1.31E-05 | 0.000229377      | 2.548972583 |
| S100BPP   | -0.265261297    | 4.048570883        | -4.619275669 | 1.52E-05 | 0.000261158      | 2.54812914  |
| AGAP3     | -0.206094906    | 6.052614064        | -4.654564626 | 1.33E-05 | 0.000233369      | 2.537013512 |
| TAF3      | -0.204941686    | 4.130986198        | -4.624790848 | 1.49E-05 | 0.000256662      | 2.533855088 |
| CDC14A    | -0.635509522    | 0.478102799        | -4.508163132 | 2.31E-05 | 0.000370631      | 2.522565896 |
| LINC00847 | -0.334548478    | 2.836237334        | -4.564668623 | 1.87E-05 | 0.00030733       | 2.493853648 |
| SEMA6C    | -0.278813153    | 3.207102384        | -4.59191307  | 1.69E-05 | 0.000282089      | 2.493037424 |
| LARP7     | 0.169047631     | 4.916535587        | 4.631379174  | 1.45E-05 | 0.000251513      | 2.492987091 |
| ARL8A     | 0.221588077     | 4.566547735        | 4.626056188  | 1.48E-05 | 0.000256026      | 2.488857276 |
| MXD1      | 0.327899213     | 2.909062878        | 4.576069326  | 1.79E-05 | 0.000296414      | 2.478022116 |
| CCT2      | 0.141603357     | 6.986108937        | 4.635331825  | 1.43E-05 | 0.000248734      | 2.460480224 |
| ZNF346    | -0.19632306     | 3.178793408        | -4.575185093 | 1.80E-05 | 0.000296747      | 2.459125231 |
| FAM160B2  | -0.115405896    | 5.935836743        | -4.633862052 | 1.44E-05 | 0.000249741      | 2.458517477 |
| BCL7A     | 0.338514634     | 3.164140339        | 4.57253224   | 1.81E-05 | 0.000299385      | 2.443908103 |
| POU2F2    | 0.47843724      | 3.80042286         | 4.584358275  | 1.74E-05 | 0.000288605      | 2.443745076 |
| ZNF420    | 0.399862458     | 2.533401702        | 4.531407137  | 2.12E-05 | 0.000344274      | 2.438284485 |
| ZHX2      | -0.233859293    | 4.825603493        | -4.616168665 | 1.54E-05 | 0.000263468      | 2.436704372 |
| PPP6R2    | -0.126310143    | 5.229718416        | -4.620729698 | 1.51E-05 | 0.000260027      | 2.431442404 |
| CRTC2     | -0.212546624    | 4.59983535         | -4.605891358 | 1.60E-05 | 0.000270472      | 2.427653947 |
| GOLPH3L   | -0.257442981    | 4.941956626        | -4.610839258 | 1.57E-05 | 0.000266854      | 2.426556543 |
| SRSF12    | 0.835543743     | -0.99403412        | 4.500048944  | 2.38E-05 | 0.000379163      | 2.421259926 |
| KDM6B     | -0.378797776    | 4.51221032         | -4.607734591 | 1.59E-05 | 0.000269687      | 2.418204105 |
| ZNF280D   | -0.152311293    | 4.60532195         | -4.603721255 | 1.61E-05 | 0.000272257      | 2.414543854 |
| POLR1E    | 0.169650256     | 5.354264436        | 4.612455629  | 1.56E-05 | 0.000265834      | 2.399466037 |
| CXXC5     | 0.240346959     | 6.988256951        | 4.618270534  | 1.53E-05 | 0.000261851      | 2.397793316 |
| TMEM86A   | -0.332240819    | 2.002648475        | -4.516568296 | 2.24E-05 | 0.000360432      | 2.39611469  |
| MMS19     | -0.166405535    | 5.77489551         | -4.614468366 | 1.55E-05 | 0.000264725      | 2.393368668 |
| ZNF502    | -0.426332619    | 1.775961075        | -4.503699684 | 2.35E-05 | 0.000375433      | 2.393252311 |
| SH2B2     | 0.493772772     | 1.939205095        | 4.502706928  | 2.36E-05 | 0.000375955      | 2.391351082 |
| DNAJC16   | -0.306765456    | 3.686301898        | -4.570951129 | 1.83E-05 | 0.000300836      | 2.390611046 |
| SPTSSA    | 0.164621975     | 4.848344126        | 4.597776925  | 1.65E-05 | 0.000276862      | 2.385363919 |

| Gene      | Log fold change | Average Expression | t            | P-value  | Adjusted P-value | B           |
|-----------|-----------------|--------------------|--------------|----------|------------------|-------------|
| ZNF202    | 0.240380626     | 3.027302651        | 4.546408677  | 2.00E-05 | 0.000327279      | 2.375850379 |
| TLL11     | -0.281089814    | 2.453445363        | -4.521815607 | 2.19E-05 | 0.000355663      | 2.374753557 |
| RCHY1     | -0.262388929    | 3.27837869         | -4.563430077 | 1.88E-05 | 0.000308422      | 2.372528481 |
| DAZAP1    | 0.144009078     | 5.808602917        | 4.607343462  | 1.59E-05 | 0.00026978       | 2.369140014 |
| PPIG      | -0.144723951    | 5.660416213        | -4.605767442 | 1.60E-05 | 0.000270472      | 2.366131403 |
| FASTKD5   | -0.188831065    | 3.997832803        | -4.581690118 | 1.75E-05 | 0.000290868      | 2.360871027 |
| RSF1      | -0.353107326    | 5.387946444        | -4.599050519 | 1.64E-05 | 0.000275847      | 2.359695733 |
| MAGEH1    | 0.157938092     | 4.888739397        | 4.590935843  | 1.69E-05 | 0.000282499      | 2.354341585 |
| BOLA3-AS1 | -0.38118889     | 1.389448032        | -4.478302637 | 2.58E-05 | 0.000405065      | 2.347823053 |
| ERRFI1    | -0.488421273    | 5.02512228         | -4.599231621 | 1.64E-05 | 0.000275847      | 2.336779043 |
| GLI3      | -0.377810228    | 6.411526831        | -4.599509372 | 1.64E-05 | 0.000275847      | 2.3302008   |
| TMEM97    | 0.371447051     | 5.282706806        | 4.584925792  | 1.73E-05 | 0.000288309      | 2.323324079 |
| NEPRO     | 0.178147323     | 5.422436443        | 4.589634073  | 1.70E-05 | 0.00028357       | 2.316197743 |
| C21orf58  | -0.352167081    | 0.914141676        | -4.460677238 | 2.75E-05 | 0.000429724      | 2.312855394 |
| FAM200A   | 0.350883201     | 2.545182441        | 4.495179801  | 2.42E-05 | 0.000384869      | 2.310775098 |
| ZNF638    | -0.193327471    | 5.905801067        | -4.591428891 | 1.69E-05 | 0.000282289      | 2.306744878 |
| DTWD1     | -0.158834312    | 5.053434572        | -4.583172599 | 1.74E-05 | 0.000289573      | 2.306214782 |
| RPAP1     | -0.219259869    | 4.342937164        | -4.559419956 | 1.91E-05 | 0.000312748      | 2.293910482 |
| VCPIP1    | 0.20752407      | 4.707243851        | 4.569664854  | 1.83E-05 | 0.000301959      | 2.287840353 |
| KIZ       | -0.294497769    | 5.067634796        | -4.578159293 | 1.78E-05 | 0.000294423      | 2.275019634 |
| ZNF879    | 0.376870704     | 1.20535359         | 4.441870401  | 2.95E-05 | 0.000455595      | 2.267726675 |
| ZNF443    | 0.668979677     | -0.555496334       | 4.43702849   | 3.00E-05 | 0.000462762      | 2.265668674 |
| NEMP1     | -0.391099411    | 3.490535429        | -4.517608905 | 2.23E-05 | 0.000359989      | 2.20585111  |
| TWINK     | 0.317319674     | 3.423486625        | 4.516228147  | 2.24E-05 | 0.000360432      | 2.204312478 |
| CDK20     | -0.294815905    | 2.575891556        | -4.483207447 | 2.53E-05 | 0.000399424      | 2.182455658 |
| NRBF2     | -0.17031028     | 4.731662457        | -4.539586611 | 2.05E-05 | 0.000335003      | 2.171608305 |
| REPS1     | -0.123307048    | 4.849108226        | -4.540212077 | 2.05E-05 | 0.000334583      | 2.168487498 |
| KPNA4     | 0.194001082     | 6.625467506        | 4.554770565  | 1.94E-05 | 0.000317892      | 2.168087974 |
| SUMO1     | 0.123824292     | 5.928596607        | 4.549486242  | 1.98E-05 | 0.000323886      | 2.155579254 |
| ATF7      | -0.148284268    | 4.946653077        | -4.530387233 | 2.12E-05 | 0.000345214      | 2.128774917 |
| NSUN6     | -0.432746117    | 1.301557964        | -4.412710246 | 3.29E-05 | 0.000496974      | 2.121051141 |
| ARF4      | 0.134680237     | 8.532967593        | 4.526669853  | 2.15E-05 | 0.000349659      | 2.115723609 |
| DCLRE1A   | -0.256396198    | 2.444125205        | -4.456886831 | 2.79E-05 | 0.000434446      | 2.110986536 |
| UBE2J1    | 0.137227602     | 6.515118364        | 4.536873787  | 2.07E-05 | 0.000338049      | 2.103631759 |
| PLEKHO2   | 0.329220554     | 5.8652265539       | 4.531493688  | 2.12E-05 | 0.000344274      | 2.095899725 |
| C15orf41  | -0.203125614    | 3.481173758        | -4.48935268  | 2.48E-05 | 0.000392054      | 2.094325265 |
| TNRC6B    | -0.276960583    | 5.035963896        | -4.519660817 | 2.21E-05 | 0.000357762      | 2.093197495 |
| ARAP3     | -0.283871753    | 3.374320256        | -4.479925727 | 2.56E-05 | 0.000403474      | 2.084529447 |
| CNNM2     | -0.194640047    | 3.962263945        | -4.49671514  | 2.41E-05 | 0.000383083      | 2.077808639 |
| SMARCAD1  | -0.290377189    | 4.638080866        | -4.506970642 | 2.32E-05 | 0.000371488      | 2.069941165 |
| LRRC4     | 0.452654275     | 0.856459792        | 4.379052145  | 3.72E-05 | 0.00054871       | 2.058406225 |
| MNT       | -0.237750362    | 5.318655716        | -4.520248945 | 2.21E-05 | 0.000357362      | 2.052306146 |
| C11orf63  | -0.280932695    | 2.432765876        | -4.444752663 | 2.92E-05 | 0.00045159       | 2.051378477 |
| ETFBKMT   | -0.396238865    | 0.872196008        | -4.38031948  | 3.70E-05 | 0.00054689       | 2.050181201 |
| VPS37B    | 0.190286073     | 5.133458168        | 4.515072088  | 2.25E-05 | 0.000361602      | 2.049781281 |
| TRIM65    | -0.227206595    | 4.249146655        | -4.483302487 | 2.53E-05 | 0.000399424      | 2.045978321 |
| RGCC      | 0.592086739     | 3.982165762        | 4.481335836  | 2.55E-05 | 0.000401788      | 2.043509483 |
| SNHG15    | 0.405201415     | 2.33527588         | 4.423544818  | 3.16E-05 | 0.000482325      | 2.040972135 |
| GGNBP2    | -0.174572983    | 5.878955322        | -4.517419562 | 2.23E-05 | 0.000359989      | 2.036874223 |
| METTL15   | -0.289976819    | 2.16709197         | -4.423325269 | 3.16E-05 | 0.000482325      | 2.036646092 |
| RPP38     | 0.256577911     | 2.404980268        | 4.427907961  | 3.11E-05 | 0.000476656      | 2.035325127 |
| MIS18BP1  | -0.34186166     | 4.083837049        | -4.478804642 | 2.57E-05 | 0.000404733      | 2.031779263 |
| ZNF703    | 0.275321271     | 6.374036371        | 4.516415644  | 2.24E-05 | 0.000360432      | 2.031201233 |
| RAD1      | 0.209546368     | 4.710254585        | 4.502617498  | 2.36E-05 | 0.000375955      | 2.031027345 |
| ZBTB12    | -0.355508685    | 2.617421381        | -4.432773422 | 3.05E-05 | 0.00046913       | 2.022394201 |
| CCDC12    | 0.340022492     | 4.16000263         | 4.487669569  | 2.49E-05 | 0.000394098      | 2.018385172 |
| MRPL47    | 0.231280675     | 4.775175895        | 4.492038552  | 2.45E-05 | 0.000388979      | 2.005031234 |
| SYMPK     | -0.144254566    | 6.20929931         | -4.507232662 | 2.32E-05 | 0.000371488      | 1.998079458 |
| ADNP      | -0.209306422    | 6.338062392        | -4.503560909 | 2.35E-05 | 0.000375433      | 1.984742207 |
| FANCF     | 0.257919352     | 2.894467919        | 4.414629456  | 3.26E-05 | 0.000495023      | 1.979868903 |
| ZNF594    | 0.595081393     | 0.436413872        | 4.343431714  | 4.24E-05 | 0.000616075      | 1.974025332 |
| ZNF136    | -0.216604858    | 2.64367285         | -4.422344721 | 3.17E-05 | 0.000483582      | 1.971964898 |
| FBRS      | -0.142589988    | 5.970577001        | -4.496795352 | 2.41E-05 | 0.000383083      | 1.963004057 |
| RXRA      | -0.1824304      | 7.177806356        | -4.489898327 | 2.47E-05 | 0.000391671      | 1.941259411 |
| ACVR2A    | -0.391737431    | 5.348943487        | -4.486574358 | 2.50E-05 | 0.000395289      | 1.939046072 |
| CYP4V2    | 0.192413587     | 4.624791229        | 4.468280156  | 2.68E-05 | 0.000419092      | 1.929308814 |
| IKBKE     | -0.268377852    | 3.281560659        | -4.423585275 | 3.16E-05 | 0.000482325      | 1.92927653  |
| DIMT1     | 0.136155648     | 5.127065329        | 4.472289394  | 2.64E-05 | 0.000413769      | 1.919464807 |
| NAIF1     | -0.238130506    | 2.903628999        | -4.412518799 | 3.29E-05 | 0.000496974      | 1.910206822 |
| MGC12916  | 0.546266817     | 0.649175589        | 4.337883773  | 4.32E-05 | 0.000626264      | 1.90890845  |

| Gene         | Log fold change | Average Expression | t            | P-value  | Adjusted P-value | B           |
|--------------|-----------------|--------------------|--------------|----------|------------------|-------------|
| ING4         | -0.228152693    | 4.103207248        | -4.456583598 | 2.79E-05 | 0.000434485      | 1.908033858 |
| STAT5A       | -0.170413471    | 4.999452527        | -4.46219626  | 2.74E-05 | 0.000427756      | 1.886415727 |
| PALB2        | 0.336936646     | 3.333149147        | 4.408654637  | 3.34E-05 | 0.000502482      | 1.883228185 |
| FAXDC2       | -0.209781666    | 4.699607346        | -4.45838469  | 2.78E-05 | 0.00043249       | 1.873757263 |
| C16orf91     | 0.27216794      | 2.554055955        | 4.388706363  | 3.59E-05 | 0.000534847      | 1.872413323 |
| ZSCAN26      | -0.232832796    | 3.204013778        | -4.401062733 | 3.43E-05 | 0.000513644      | 1.869237051 |
| KAT5         | 0.155902747     | 4.366403128        | 4.445918653  | 2.91E-05 | 0.000450573      | 1.86292644  |
| GBP1         | 0.404168144     | 4.986768263        | 4.46222447   | 2.74E-05 | 0.000427756      | 1.860645626 |
| MOB3A        | -0.150934509    | 6.454264974        | -4.468570819 | 2.67E-05 | 0.000419076      | 1.859532471 |
| SIX5         | -0.280249774    | 3.348596153        | -4.41246991  | 3.29E-05 | 0.000496974      | 1.852791302 |
| AJUBA        | 0.373025709     | 4.579324189        | 4.450243687  | 2.86E-05 | 0.000444338      | 1.848328243 |
| WEE2-AS1     | -0.752294698    | -1.139139686       | -4.306850522 | 4.84E-05 | 0.000689951      | 1.845660951 |
| TAF5L        | 0.284065477     | 4.046197342        | 4.430409006  | 3.08E-05 | 0.000472759      | 1.83431892  |
| LOC100505715 | -0.622116666    | -0.986525773       | -4.297776024 | 5.00E-05 | 0.000708536      | 1.826262212 |
| RBM12        | 0.249202386     | 6.456127925        | 4.458816593  | 2.77E-05 | 0.000432246      | 1.82535023  |
| TMEM55B      | 0.306203688     | 4.712674201        | 4.44501185   | 2.92E-05 | 0.00045159       | 1.823435617 |
| ZNF613       | 0.318735311     | 1.740498447        | 4.326669615  | 4.50E-05 | 0.000646815      | 1.82311007  |
| SUPT7L       | -0.127287724    | 4.529829642        | -4.440480997 | 2.97E-05 | 0.000457366      | 1.816353413 |
| ANKRD27      | -0.287212825    | 4.439683229        | -4.424474201 | 3.15E-05 | 0.00048175       | 1.815975592 |
| TMEM41B      | 0.40776055      | 3.894395529        | 4.419496839  | 3.21E-05 | 0.000486715      | 1.814270798 |
| POP14        | 0.232811686     | 3.622769942        | 4.408388233  | 3.34E-05 | 0.000502482      | 1.812868573 |
| POU3F1       | 1.259605901     | -3.664674794       | 4.382968234  | 3.67E-05 | 0.000545154      | 1.808556284 |
| SELENOF      | 0.110029925     | 7.369374199        | 4.449235787  | 2.87E-05 | 0.000445538      | 1.801073965 |
| GPATCH11     | -0.321919158    | 3.238936096        | -4.38044274  | 3.70E-05 | 0.00054689       | 1.799109169 |
| NARFL        | -0.297215671    | 3.878020926        | -4.408965539 | 3.33E-05 | 0.00050242       | 1.786282868 |
| DPH6         | 0.29065752      | 1.795588996        | 4.329959302  | 4.45E-05 | 0.000639713      | 1.774438371 |
| PSMD12       | 0.18598682      | 5.718504508        | 4.4418083    | 2.95E-05 | 0.000455595      | 1.773351515 |
| ARPC5L       | 0.152144234     | 4.698215697        | 4.419792749  | 3.20E-05 | 0.000486715      | 1.761131846 |
| RBM4B        | -0.200018464    | 3.84995906         | -4.404311545 | 3.39E-05 | 0.000508553      | 1.760899172 |
| MBLAC2       | -0.266909294    | 2.671706852        | -4.351426916 | 4.11E-05 | 0.000601237      | 1.755500946 |
| ADM2         | -0.410122636    | 3.973933106        | -4.420932002 | 3.19E-05 | 0.000485616      | 1.752660083 |
| ZMAT3        | 0.228897898     | 7.3940892          | 4.433375283  | 3.05E-05 | 0.000468567      | 1.747462361 |
| ZNF217       | -0.347485326    | 5.689264931        | -4.427150425 | 3.12E-05 | 0.000477504      | 1.730718881 |
| KLHDC1       | -0.40489539     | 0.626942896        | -4.28678419  | 5.21E-05 | 0.000734468      | 1.725159706 |
| ALMS1-IT1    | 1.07218242      | -2.423715252       | 4.31314193   | 4.73E-05 | 0.000676259      | 1.721738384 |
| SLC29A3      | -0.226744821    | 3.722881265        | -4.386277233 | 3.62E-05 | 0.000539105      | 1.719555661 |
| PARL         | 0.186427392     | 4.789447649        | 4.410361087  | 3.31E-05 | 0.000500346      | 1.716118561 |
| RIOK1        | 0.223545772     | 4.498889724        | 4.405478126  | 3.37E-05 | 0.00050688       | 1.716056017 |
| CENPV        | 0.373829634     | 0.78881615         | 4.278124284  | 5.37E-05 | 0.000752959      | 1.715260193 |
| VRK3         | -0.188586486    | 4.243580353        | -4.396046807 | 3.49E-05 | 0.000522684      | 1.711169464 |
| FAM212B      | 0.555560977     | 2.843669715        | 4.342865519  | 4.25E-05 | 0.000616755      | 1.710519297 |
| PGBD4        | -0.521875537    | 0.980735888        | -4.276854504 | 5.40E-05 | 0.000755026      | 1.707771271 |
| PHF8         | -0.285394401    | 4.010786908        | -4.381499541 | 3.69E-05 | 0.000546482      | 1.693013029 |
| COX11        | 0.15785533      | 4.395684981        | 4.39414896   | 3.52E-05 | 0.00052582       | 1.692968804 |
| C10orf10     | -0.552443942    | 4.323428172        | -4.382678372 | 3.67E-05 | 0.000545161      | 1.688719755 |
| ARHGAP24     | -0.248743954    | 5.977796573        | -4.419590896 | 3.20E-05 | 0.000486715      | 1.687709903 |
| GPSM2        | -0.32326613     | 4.111563199        | -4.382427322 | 3.67E-05 | 0.000545161      | 1.672399671 |
| PWP1         | 0.108165134     | 5.971727565        | 4.41362825   | 3.28E-05 | 0.000496352      | 1.670547256 |
| PRAG1        | 0.645031392     | 2.134616295        | 4.317178449  | 4.66E-05 | 0.000667662      | 1.651630839 |
| ZNF689       | -0.20162084     | 3.648618044        | -4.3550308   | 4.06E-05 | 0.000593942      | 1.644302822 |
| POLG         | -0.194629251    | 4.915980749        | -4.390008453 | 3.57E-05 | 0.000533351      | 1.642564599 |
| RAB18        | 0.13209541      | 6.441823098        | 4.406924293  | 3.36E-05 | 0.000504693      | 1.640920284 |
| B4GALT4      | 0.204719315     | 4.083511217        | 4.369521515  | 3.85E-05 | 0.000566556      | 1.637300099 |
| USP6NL       | -0.202702332    | 3.925009497        | -4.366722338 | 3.89E-05 | 0.000571837      | 1.636299058 |
| UVSSA        | -0.482112375    | 1.531044884        | -4.290053453 | 5.15E-05 | 0.000726488      | 1.635572466 |
| CCDC121      | -0.43312003     | 0.445252795        | -4.247076429 | 6.01E-05 | 0.000825541      | 1.632245875 |
| TRIM16       | -0.243309131    | 2.859031562        | -4.331246342 | 4.43E-05 | 0.000637326      | 1.62745613  |
| PNPLA6       | -0.157081972    | 5.93706266         | -4.401462584 | 3.43E-05 | 0.000513399      | 1.626767766 |
| ZBED4        | 0.327706394     | 4.285177119        | 4.3726535    | 3.81E-05 | 0.000561187      | 1.622853196 |
| GDF5         | 0.457629005     | 3.56404684         | 4.333424151  | 4.39E-05 | 0.000633394      | 1.604031142 |
| NAE1         | 0.175029598     | 5.43173361         | 4.389378543  | 3.58E-05 | 0.000534057      | 1.598404378 |
| MICALL1      | 0.219399217     | 5.598030238        | 4.380225151  | 3.70E-05 | 0.00054689       | 1.56417236  |
| TMEM171      | -0.518360747    | 0.622417593        | -4.234113629 | 6.30E-05 | 0.000860348      | 1.553555276 |
| IDI1         | 0.374274544     | 6.579023238        | 4.380911288  | 3.69E-05 | 0.00054689       | 1.551196851 |
| SEMA7A       | 0.439237437     | 4.732776758        | 4.350974221  | 4.12E-05 | 0.000601649      | 1.541790362 |
| NOL11        | 0.238015234     | 4.867351777        | 4.360570274  | 3.98E-05 | 0.000583157      | 1.540007254 |
| ZBED8        | 0.549960253     | 1.013492394        | 4.211365352  | 6.84E-05 | 0.000920389      | 1.535806255 |
| TMEM87A      | 0.172657884     | 5.537191058        | 4.371209877  | 3.83E-05 | 0.000563612      | 1.531449575 |
| MUM1         | -0.157681287    | 5.182907381        | -4.361976262 | 3.96E-05 | 0.000581295      | 1.516556306 |
| BCL2L11      | -0.41292593     | 3.272226296        | -4.299335916 | 4.98E-05 | 0.000705717      | 1.48722357  |

| Gene     | Log fold change | Average Expression | t            | P-value    | Adjusted P-value | B            |
|----------|-----------------|--------------------|--------------|------------|------------------|--------------|
| THAP11   | -0.17091818     | 4.348596728        | -4.333439718 | 4.39E-05   | 0.000633394      | 1.487018779  |
| NOP56    | 0.21938683      | 6.216329045        | 4.361585684  | 3.96E-05   | 0.000581559      | 1.483546683  |
| VASN     | 0.206913538     | 8.661280365        | 4.345346179  | 4.21E-05   | 0.000612965      | 1.481583421  |
| ZNF37A   | -0.187755883    | 4.646957081        | -4.338914767 | 4.31E-05   | 0.000625114      | 1.475518699  |
| COPS8    | 0.128938317     | 6.46311088         | 4.356439221  | 4.04E-05   | 0.000591464      | 1.463670233  |
| UPF3A    | 0.210022643     | 3.362905363        | 4.30028095   | 4.96E-05   | 0.000703961      | 1.462664132  |
| ADPGK    | 0.140277885     | 5.115049289        | 4.343710233  | 4.23E-05   | 0.000616043      | 1.462028221  |
| FAM46B   | -0.741539381    | 0.234708813        | -4.200377476 | 7.11E-05   | 0.000951477      | 1.459698345  |
| PGM3     | 0.186621434     | 5.90699653         | 4.348948694  | 4.15E-05   | 0.000605534      | 1.450134005  |
| LRRC20   | -0.229120528    | 3.017603277        | -4.293652888 | 5.08E-05   | 0.000718405      | 1.44734608   |
| CNBP     | 0.181855772     | 8.118427518        | 4.33607946   | 4.35E-05   | 0.000629796      | 1.429311122  |
| PTPN1    | 0.268110721     | 4.853898859        | 4.333204749  | 4.40E-05   | 0.000633394      | 1.423151832  |
| CBX2     | 0.680801085     | 0.174233429        | 4.171214365  | 7.90E-05   | 0.001029714      | 1.417047352  |
| THAP2    | -0.353169369    | 2.043780181        | -4.217765586 | 6.68E-05   | 0.000904188      | 1.413299931  |
| SMIM13   | 0.271387152     | 3.944552274        | 4.304501877  | 4.88E-05   | 0.000694553      | 1.409132933  |
| ZBTB4    | -0.166775827    | 7.704250994        | -4.335319588 | 4.36E-05   | 0.000630334      | 1.408411597  |
| FEZ2     | 0.12043073      | 5.889278104        | 4.338207691  | 4.32E-05   | 0.000626126      | 1.40803192   |
| ADPRHL2  | 0.170574428     | 4.630986313        | 4.321060146  | 4.60E-05   | 0.000658916      | 1.402914389  |
| IKBIP    | 0.107828828     | 6.354412931        | 4.335745807  | 4.36E-05   | 0.000629958      | 1.392245624  |
| PITPNM2  | -0.261782047    | 3.715021363        | -4.282920405 | 5.28E-05   | 0.000741361      | 1.382982863  |
| INVS     | -0.248912688    | 3.617190691        | -4.285311123 | 5.24E-05   | 0.000736345      | 1.368424238  |
| PI4KAP1  | 0.687777799     | -1.355300831       | 4.161137618  | 8.18E-05   | 0.001060116      | 1.3611116763 |
| TMEM263  | 0.232199868     | 6.860543097        | 4.326387222  | 4.51E-05   | 0.000646865      | 1.359138608  |
| BBOF1    | 0.208595197     | 2.862484687        | 4.249559655  | 5.96E-05   | 0.000820417      | 1.358746122  |
| CREBRF   | -0.405425197    | 4.720975666        | -4.308128822 | 4.82E-05   | 0.000687401      | 1.34858323   |
| ZNF829   | -0.297727676    | 2.270884654        | -4.22266012  | 6.56E-05   | 0.00089253       | 1.345052907  |
| ADM      | -0.33152395     | 8.095080254        | -4.306301064 | 4.85E-05   | 0.000690677      | 1.335583234  |
| AARS2    | -0.243741858    | 3.605816219        | -4.269696937 | 5.54E-05   | 0.000773416      | 1.332329245  |
| GFPT2    | -0.139081455    | 6.503074872        | -4.316708948 | 4.67E-05   | 0.000668169      | 1.324381182  |
| MAP1LC3B | 0.119365246     | 7.202556774        | 4.311708749  | 4.76E-05   | 0.00067915       | 1.312718104  |
| BAG4     | 0.209030292     | 3.976315167        | 4.270725807  | 5.52E-05   | 0.000771256      | 1.310762789  |
| TLE1     | 0.259880138     | 4.338020448        | 4.285089473  | 5.24E-05   | 0.000736345      | 1.310331196  |
| NACAD    | -0.279331079    | 3.537341547        | -4.257029554 | 5.80E-05   | 0.00080322       | 1.305152884  |
| PLEKHG1  | -0.507053864    | 4.577222543        | -4.292157508 | 5.11E-05   | 0.000721638      | 1.30514807   |
| TSPYL5   | -0.20615637     | 4.215387758        | -4.282403344 | 5.29E-05   | 0.000742061      | 1.291828207  |
| SPOP     | -0.116076939    | 5.599192332        | -4.301012913 | 4.95E-05   | 0.000702753      | 1.287395202  |
| PUS10    | -0.43895644     | 0.509303164        | -4.14966955  | 8.53E-05   | 0.001098719      | 1.286399142  |
| FKRP     | 0.166583047     | 3.861484264        | 4.267214821  | 5.59E-05   | 0.000779673      | 1.285652807  |
| CEP57L1  | -0.279514997    | 2.365152228        | -4.207600818 | 6.93E-05   | 0.000930426      | 1.285092786  |
| HMGN3    | 0.268434036     | 3.496645585        | 4.248660791  | 5.98E-05   | 0.000822332      | 1.27836035   |
| SETD3    | 0.113295097     | 5.592433951        | 4.297720416  | 5.00E-05   | 0.000785336      | 1.277549359  |
| AURKA    | -0.421903724    | 2.123851608        | -4.188369606 | 7.42E-05   | 0.000985461      | 1.260109132  |
| ZNF605   | -0.30260745     | 3.502106665        | -4.239523933 | 6.18E-05   | 0.000846032      | 1.248244235  |
| ZNF629   | 0.237106981     | 5.579172169        | 4.285049896  | 5.24E-05   | 0.000736345      | 1.240676642  |
| FJX1     | 0.26510497      | 3.784608156        | 4.251510621  | 5.92E-05   | 0.00081615       | 1.232986736  |
| RFX2     | -0.201654654    | 3.669379807        | -4.244123506 | 6.08E-05   | 0.000833626      | 1.220902492  |
| CUL7     | -0.157970513    | 6.204979144        | -4.286243562 | 5.22E-05   | 0.000735221      | 1.218915257  |
| C16orf87 | 0.261388177     | 2.07931515         | 4.183062479  | 7.57E-05   | 0.000995599      | 1.21192096   |
| TFAM     | 0.221902259     | 4.728123597        | 4.265481567  | 5.62E-05   | 0.000783128      | 1.20936445   |
| NCL      | 0.134593538     | 9.27532227         | 4.25806574   | 5.78E-05   | 0.00080145       | 1.207067401  |
| GAS2L1   | -0.21371478     | 4.764370587        | -4.264004232 | 5.66E-05   | 0.000786597      | 1.201830332  |
| TRMT10B  | -0.250770729    | 1.787123339        | -4.168341063 | 7.98E-05   | 0.001038545      | 1.192054855  |
| GPR157   | 0.562394999     | 0.70436718         | 4.118650434  | 9.52E-05   | 0.001204245      | 1.190082285  |
| SBDS     | 0.161150507     | 6.427652966        | 4.277313742  | 5.39E-05   | 0.000754471      | 1.188342808  |
| TTC23    | -0.208138734    | 4.056229276        | -4.237794779 | 6.22E-05   | 0.000849778      | 1.184992927  |
| FOPNL    | 0.123315655     | 5.009981582        | 4.266036733  | 5.61E-05   | 0.000782279      | 1.184538806  |
| TVP23B   | 0.254208294     | 2.903783655        | 4.2017133    | 7.08E-05   | 0.000948612      | 1.180745134  |
| USP28    | -0.244924344    | 4.548020771        | -4.254382222 | 5.86E-05   | 0.000809953      | 1.179311338  |
| RSBN1L   | 0.324007387     | 3.75563            | 4.221643     | 6.59E-05   | 0.000894188      | 1.178779242  |
| PPAN     | 0.393138947     | 1.187058158        | 4.137237561  | 8.91E-05   | 0.001139691      | 1.178619897  |
| PCGF3    | -0.18416924     | 4.412280723        | -4.251883258 | 5.91E-05   | 0.000815799      | 1.177305503  |
| NUP35    | 0.277393004     | 2.40407387         | 4.180301625  | 7.64E-05   | 0.001002112      | 1.168930777  |
| PTHLH    | -0.331631051    | 2.207504892        | -4.18146618  | 7.61E-05   | 0.001000431      | 1.166872462  |
| ZNF682   | 0.537209366     | 0.1026498          | 4.093006297  | 0.00010427 | 0.001297044      | 1.163490036  |
| ZNF500   | 0.231912466     | 2.975792572        | 4.187323741  | 7.45E-05   | 0.000986552      | 1.160184019  |
| VBP1     | 0.136329273     | 5.222620627        | 4.258945861  | 5.76E-05   | 0.000799641      | 1.15789609   |
| CEP295   | -0.53738882     | 1.657124274        | -4.118287739 | 9.53E-05   | 0.001204785      | 1.148599436  |
| SPHK1    | 0.31235031      | 6.247033246        | 4.263130751  | 5.67E-05   | 0.000788358      | 1.144229607  |
| PPME1    | -0.155948323    | 5.100861017        | -4.247593078 | 6.00E-05   | 0.000824755      | 1.134388701  |
| PTP4A2   | 0.093936314     | 8.142175113        | 4.250110356  | 5.95E-05   | 0.000819537      | 1.131020778  |



| Gene      | Log fold change | Average Expression | t            | P-value     | Adjusted P-value | B            |
|-----------|-----------------|--------------------|--------------|-------------|------------------|--------------|
| ZNF252P   | -0.191221835    | 3.772279088        | -4.218578819 | 6.66E-05    | 0.000902473      | 1.130855348  |
| PPP6C     | 0.102480797     | 5.832980132        | 4.256946408  | 5.80E-05    | 0.00080322       | 1.123063459  |
| SLC25A33  | 0.29506866      | 2.085052537        | 4.16986417   | 7.93E-05    | 0.001033801      | 1.117184427  |
| RRAD      | 0.668220021     | -0.756764208       | 4.075900325  | 0.000110768 | 0.001369955      | 1.114256323  |
| KDM8      | 0.292198264     | 1.484284716        | 4.120850041  | 9.45E-05    | 0.00119671       | 1.113540837  |
| STK3      | -0.251102999    | 4.469067644        | -4.23385533  | 6.31E-05    | 0.000860369      | 1.108657791  |
| TSKU      | 0.191025426     | 6.163184052        | 4.252479638  | 5.90E-05    | 0.00081479       | 1.107011533  |
| DNAL4     | -0.247483035    | 3.246953215        | -4.201434775 | 7.09E-05    | 0.000948716      | 1.099553306  |
| TRIM23    | 0.379023701     | 3.778724297        | 4.195750237  | 7.23E-05    | 0.000963978      | 1.09562244   |
| NASP      | 0.227240931     | 4.889233952        | 4.231028722  | 6.37E-05    | 0.000866821      | 1.089511675  |
| PIK3CB    | -0.321994614    | 3.44721703         | -4.196881415 | 7.20E-05    | 0.000960925      | 1.088804634  |
| NR4A1     | -0.455891228    | 3.849953621        | -4.240297237 | 6.16E-05    | 0.000844443      | 1.085303329  |
| ZNF485    | 0.632289357     | 0.318735159        | 4.066028847  | 0.000114693 | 0.001410396      | 1.075488154  |
| BCOR      | 0.483749486     | 4.543805943        | 4.213531301  | 6.78E-05    | 0.000914069      | 1.070944179  |
| SAR1A     | 0.154908104     | 7.54492381         | 4.237965939  | 6.21E-05    | 0.000849778      | 1.064793474  |
| CBFB      | 0.170189852     | 5.350373981        | 4.231650049  | 6.36E-05    | 0.000865665      | 1.059398266  |
| RIMKLB    | 0.270792613     | 3.552132045        | 4.184358628  | 7.53E-05    | 0.000993593      | 1.041356218  |
| STK17A    | 0.248052379     | 5.560302075        | 4.232844843  | 6.33E-05    | 0.000862726      | 1.041334878  |
| ZNF701    | -0.2952545      | 1.697593877        | -4.107555526 | 9.90E-05    | 0.001243196      | 1.038351467  |
| THAP1     | -0.219363324    | 3.211325032        | -4.180856497 | 7.63E-05    | 0.001001743      | 1.035923913  |
| DLGAP1    | -0.785985154    | -1.327195089       | -4.04654374  | 0.000122837 | 0.001486278      | 1.01478037   |
| NAA15     | 0.338097379     | 5.347745619        | 4.217551409  | 6.69E-05    | 0.000904188      | 1.012892006  |
| PRKRA     | 0.105750719     | 5.018782723        | 4.209755702  | 6.88E-05    | 0.000924076      | 1.000206902  |
| COPS7B    | -0.118395726    | 4.122414883        | -4.187797681 | 7.44E-05    | 0.000985745      | 0.998823107  |
| PXDC1     | 0.293388974     | 5.887370061        | 4.222360767  | 6.57E-05    | 0.000892686      | 0.998452762  |
| SFPQ      | 0.213295218     | 7.289650633        | 4.21900763   | 6.65E-05    | 0.000901893      | 0.99297773   |
| PATZ1     | -0.138954524    | 4.269901727        | -4.187797615 | 7.44E-05    | 0.000985745      | 0.992084124  |
| TSPAN3    | 0.1088279       | 7.662338896        | 4.213892954  | 6.78E-05    | 0.000913699      | 0.98863134   |
| CPEB2     | 0.458243151     | 3.635671408        | 4.173539316  | 7.83E-05    | 0.001022962      | 0.985566224  |
| RUNX1T1   | -0.341155924    | 5.028120381        | -4.198555973 | 7.16E-05    | 0.000956866      | 0.978413912  |
| CREG1     | 0.124615745     | 7.576877663        | 4.210914702  | 6.85E-05    | 0.000921057      | 0.975432731  |
| DDX1      | 0.136805535     | 6.900306509        | 4.215228847  | 6.74E-05    | 0.000910953      | 0.974577676  |
| ARHGEF40  | -0.118749725    | 6.673246667        | -4.214257999 | 6.77E-05    | 0.000913318      | 0.96980362   |
| FAM222A   | 0.498397751     | -0.085923135       | 4.032262318  | 0.000129156 | 0.001553999      | 0.962156143  |
| SH3BGR1   | 0.102574665     | 7.337259703        | 4.205447574  | 6.98E-05    | 0.000936814      | 0.949683514  |
| NCK1      | -0.129883117    | 5.021513417        | -4.193110159 | 7.30E-05    | 0.000972286      | 0.937629114  |
| ZNF609    | -0.322432346    | 5.171044782        | -4.189219622 | 7.40E-05    | 0.00098333       | 0.936572867  |
| CNNM3     | -0.196355749    | 3.676907502        | -4.158446756 | 8.26E-05    | 0.001069428      | 0.930256026  |
| MBNL1-AS1 | 0.210478563     | 2.690370695        | 4.115501416  | 9.63E-05    | 0.001212381      | 0.92801395   |
| TAB1      | -0.199454385    | 4.765249553        | -4.183537233 | 7.55E-05    | 0.000995599      | 0.922529436  |
| TFCP2     | -0.126322317    | 4.721485911        | -4.180266747 | 7.64E-05    | 0.001002112      | 0.922439962  |
| KNOP1     | -0.192927625    | 3.037104652        | -4.12275639  | 9.38E-05    | 0.001190812      | 0.917646686  |
| NAB2      | 0.211533689     | 6.052512216        | 4.196898723  | 7.20E-05    | 0.000960925      | 0.914755059  |
| LIN9      | -0.365566772    | 1.435188246        | -4.048657206 | 0.000121927 | 0.001481222      | 0.912020404  |
| MBIP      | 0.140741373     | 3.89975868         | 4.156698697  | 8.32E-05    | 0.001075196      | 0.905463965  |
| RNF139    | 0.170943468     | 5.456104894        | 4.190948314  | 7.36E-05    | 0.00097812       | 0.904360875  |
| TLE4      | 0.350963672     | 3.461626758        | 4.145126081  | 8.67E-05    | 0.001113796      | 0.902932951  |
| ATG2A     | -0.145137026    | 5.314992275        | -4.184558827 | 7.53E-05    | 0.000993593      | 0.901205556  |
| SP4       | 0.408379392     | 2.365578077        | 4.106045866  | 9.96E-05    | 0.001248826      | 0.900500601  |
| DUSP4     | 0.52123353      | 3.263555843        | 4.134218602  | 9.01E-05    | 0.001149074      | 0.898096643  |
| THAP3     | 0.272420621     | 3.063095242        | 4.114739953  | 9.65E-05    | 0.001213941      | 0.896813772  |
| HNRNPH2   | 0.123357224     | 6.339460511        | 4.191678103  | 7.34E-05    | 0.000976427      | 0.893418654  |
| DOK1      | 0.187117819     | 4.87261833         | 4.17573884   | 7.77E-05    | 0.001015827      | 0.892504156  |
| RIN1      | 0.219309077     | 5.453184069        | 4.179213188  | 7.67E-05    | 0.001005023      | 0.880420606  |
| IER3      | -0.430964956    | 4.822627109        | -4.183215098 | 7.56E-05    | 0.000995599      | 0.880171512  |
| NOP16     | 0.381064093     | 3.354261287        | 4.120870719  | 9.45E-05    | 0.00119671       | 0.879983904  |
| PDP1      | -0.332683935    | 4.644967231        | -4.177081569 | 7.73E-05    | 0.001011838      | 0.879767122  |
| PTPN23    | -0.146000187    | 6.982300781        | -4.186753424 | 7.47E-05    | 0.000987702      | 0.8777440164 |
| PPP2R5D   | -0.164048392    | 5.904852937        | -4.185528384 | 7.50E-05    | 0.000991175      | 0.875590665  |
| CENPA     | -0.574188756    | 0.452114647        | -4.010280101 | 0.000139497 | 0.001653326      | 0.866117383  |
| FAM177A1  | 0.161913236     | 5.059616403        | 4.172417735  | 7.86E-05    | 0.001026182      | 0.86539058   |
| C6orf47   | 0.156740853     | 4.195859606        | 4.146174341  | 8.63E-05    | 0.001110591      | 0.861692952  |
| GMIP      | -0.24740319     | 2.603977769        | -4.087065347 | 0.000106484 | 0.001321312      | 0.861448736  |
| EBLN3P    | -0.233136095    | 5.018992113        | -4.166003255 | 8.04E-05    | 0.00104634       | 0.848943524  |
| SPRTN     | -0.189671957    | 3.293156206        | -4.125050509 | 9.31E-05    | 0.001182142      | 0.846603134  |
| PPARGC1A  | -0.434629919    | 1.7009906          | -4.054418019 | 0.000119481 | 0.001459743      | 0.832659457  |
| LYNC1L1   | 0.152421946     | 5.299706318        | 4.165764889  | 8.05E-05    | 0.00104634       | 0.83153211   |
| SLC38A6   | 0.188279566     | 4.524387464        | 4.151207248  | 8.48E-05    | 0.001093647      | 0.831089884  |
| ADO       | 0.138286901     | 5.077587352        | 4.162026254  | 8.16E-05    | 0.001057667      | 0.82925067   |
| GBA2      | 0.199451741     | 4.09546794         | 4.133451512  | 9.03E-05    | 0.001150266      | 0.827993299  |

| Gene      | Log fold change | Average Expression | t            | P-value     | Adjusted P-value | B           |
|-----------|-----------------|--------------------|--------------|-------------|------------------|-------------|
| WBP11     | 0.110737031     | 5.637132537        | 4.164539397  | 8.09E-05    | 0.001050025      | 0.815507596 |
| MSH6      | 0.197402833     | 5.917154835        | 4.162322772  | 8.15E-05    | 0.001057458      | 0.800363724 |
| RNF123    | -0.219767786    | 4.458751982        | -4.141844563 | 8.77E-05    | 0.001123058      | 0.794479523 |
| SAP130    | -0.134719488    | 5.391350741        | -4.152753252 | 8.43E-05    | 0.001088567      | 0.788932325 |
| HIC1      | 0.271204858     | 5.6249989          | 4.154569052  | 8.38E-05    | 0.001082467      | 0.786537563 |
| HNRNPK    | 0.098659093     | 8.373261462        | 4.147573736  | 8.59E-05    | 0.001106011      | 0.78531734  |
| ANKRD42   | -0.187302281    | 3.27466394         | -4.104877396 | 1.00E-04    | 0.001252965      | 0.785249209 |
| ACKR3     | 0.264523926     | 4.969560615        | 4.14456129   | 8.68E-05    | 0.001114138      | 0.771765021 |
| PRELID3B  | 0.161368045     | 5.026968209        | 4.143371368  | 8.72E-05    | 0.001117918      | 0.767658093 |
| YTHDC1    | -0.15476611     | 5.058275286        | -4.144720275 | 8.68E-05    | 0.001114138      | 0.765097317 |
| HDHD3     | 0.296613872     | 2.276762491        | 4.034435811  | 0.000128175 | 0.001545895      | 0.753985647 |
| ZBTB49    | 0.354602254     | 1.109591812        | 4.000067816  | 0.000144567 | 0.001700042      | 0.753180729 |
| C22orf23  | 0.537006556     | -0.0494505         | 3.966457918  | 0.000162532 | 0.001878608      | 0.753082525 |
| RPTN      | 1.389936651     | -4.033151148       | 4.053168068  | 0.000120008 | 0.001462816      | 0.752648842 |
| WDR20     | 0.164002369     | 3.934189779        | 4.111937983  | 9.75E-05    | 0.001225046      | 0.745941408 |
| GNPDA2    | 0.162600223     | 4.360247769        | 4.115337738  | 9.63E-05    | 0.001212381      | 0.740139966 |
| RPUSD3    | -0.287690318    | 3.567499787        | -4.096374647 | 0.000103034 | 0.001284858      | 0.740095226 |
| ALAS1     | 0.164469768     | 5.06290247         | 4.133975736  | 9.02E-05    | 0.001149094      | 0.736374034 |
| INO80C    | 0.376572233     | 1.284913989        | 4.009999963  | 0.000139633 | 0.001653646      | 0.73283998  |
| ATP6V0A1  | -0.182631351    | 5.56764939         | -4.135150824 | 8.98E-05    | 0.001146239      | 0.721800625 |
| DGKQ      | -0.193130796    | 3.948917271        | -4.104484103 | 0.000100117 | 0.001253669      | 0.721681135 |
| C10orf198 | 0.261452731     | 6.987827441        | 4.140044399  | 8.82E-05    | 0.001129319      | 0.720236911 |
| RBM8A     | 0.128656466     | 4.631645554        | 4.11760909   | 9.56E-05    | 0.001206422      | 0.715199655 |
| TDG       | -0.246492999    | 2.785048788        | -4.066305307 | 0.000114581 | 0.001410173      | 0.711377271 |
| ZNF107    | 0.390141946     | 1.723255996        | 3.99267322   | 0.000148348 | 0.001735026      | 0.702263469 |
| CBX3      | 0.141840076     | 6.754446907        | 4.13521305   | 8.98E-05    | 0.001146239      | 0.70005577  |
| GATAD1    | -0.171656783    | 4.702116658        | -4.117432864 | 9.56E-05    | 0.001206422      | 0.696968143 |
| LRIG2     | 0.336097698     | 3.033187719        | 4.059245845  | 0.000117467 | 0.001437065      | 0.692217183 |
| DDX24     | 0.13410328      | 7.550753877        | 4.126188578  | 9.27E-05    | 0.001178364      | 0.682284997 |
| NMT1      | -0.166878592    | 6.888994636        | -4.129159542 | 9.17E-05    | 0.001166971      | 0.681607112 |
| CEP112    | 0.159290254     | 3.406949595        | 4.072700732  | 0.000112026 | 0.001383241      | 0.673457054 |
| GRWD1     | 0.143698145     | 5.45606528         | 4.120654607  | 9.45E-05    | 0.00119671       | 0.672308676 |
| TMC7      | -0.526644682    | -0.248817321       | -3.932900177 | 0.000182596 | 0.002080653      | 0.663262676 |
| ZNF8      | 0.398067377     | 1.886571448        | 3.994628615  | 0.000147339 | 0.001725905      | 0.65004661  |
| ZNF589    | -0.300688031    | 3.225688255        | -4.048664518 | 0.000121924 | 0.001481222      | 0.647330739 |
| SMARCE1   | 0.168589388     | 6.017742933        | 4.116513022  | 9.59E-05    | 0.001209355      | 0.640608874 |
| N6AMT1    | -0.266836855    | 2.686010582        | -4.035233736 | 0.000127816 | 0.001542806      | 0.637711757 |
| CCNF      | 0.400409585     | 2.641123585        | 4.002829156  | 0.000143179 | 0.001687671      | 0.614703909 |
| AIFM2     | 0.180006554     | 4.673544803        | 4.090723324  | 0.000105115 | 0.001305406      | 0.612722079 |
| PROB1     | 0.386698567     | 1.816631984        | 3.984278645  | 0.000152755 | 0.001782423      | 0.60739222  |
| PLEKHA6   | -0.321245072    | 2.86151841         | -4.031926511 | 0.000129308 | 0.00155459       | 0.594053236 |
| RBM4      | 0.275746223     | 1.632967201        | 3.975076705  | 0.000157731 | 0.001831968      | 0.59249215  |
| NME6      | -0.236373928    | 2.982731548        | -4.026561041 | 0.000131765 | 0.001576574      | 0.585972121 |
| ZNF496    | -0.192318686    | 5.271470839        | -4.092555607 | 0.000104436 | 0.001298042      | 0.585599725 |
| FUS       | 0.213404999     | 7.407780241        | 4.099274177  | 0.000101982 | 0.001274901      | 0.584890896 |
| UQCRC2    | 0.105718655     | 6.751268197        | 4.100983101  | 0.000101367 | 0.001268261      | 0.58377472  |
| ZNF781    | -0.424285611    | -0.665360562       | -3.913354944 | 0.000195354 | 0.002206487      | 0.583532969 |
| ASNSD1    | 0.112249526     | 5.824365045        | 4.098189008  | 0.000102375 | 0.001278748      | 0.581076128 |
| GTF2IRD1  | -0.171735042    | 4.135950413        | -4.062260453 | 0.000116226 | 0.001424601      | 0.581074803 |
| WDR45B    | 0.123129429     | 6.261247444        | 4.097057248  | 0.000102786 | 0.001282819      | 0.572455836 |
| MYLIP     | -0.335695767    | 3.825252144        | -4.053129896 | 0.000120024 | 0.001462816      | 0.570893786 |
| CEBPB     | 0.360878821     | 6.510615381        | 4.095743581  | 0.000103265 | 0.001286666      | 0.568823776 |
| TMEM68    | -0.231458543    | 2.976632077        | -4.018773475 | 0.00013541  | 0.001612508      | 0.568136404 |
| C18orf25  | 0.239979257     | 2.948372535        | 4.022789658  | 0.000133518 | 0.001595021      | 0.565785697 |
| SMAD3     | -0.202534122    | 7.130400699        | -4.093857915 | 0.000103956 | 0.00129421       | 0.56284928  |
| RNF25     | 0.272538975     | 4.5286974          | 4.067751337  | 0.000113999 | 0.001405298      | 0.546301111 |
| ARMC5     | -0.224779934    | 3.825049993        | -4.060163502 | 0.000117088 | 0.001433997      | 0.540808792 |
| BORA      | -0.555339104    | 0.701083216        | -3.90323999  | 0.000202287 | 0.002274068      | 0.53144975  |
| CTNS      | -0.145291261    | 5.17499151         | -4.076216311 | 0.000110644 | 0.001369552      | 0.527487379 |
| MAPK8     | 0.173547315     | 3.963004281        | 4.047785186  | 0.000122302 | 0.001483855      | 0.525777442 |
| ACER2     | 1.036003617     | -1.493927051       | 3.893493518  | 0.00020919  | 0.002339452      | 0.523546499 |
| PPIL4     | 0.152908557     | 4.805443642        | 4.064890526  | 0.000115154 | 0.001413758      | 0.522484751 |
| UFSP1     | 0.36336799      | 0.697733699        | 3.908979228  | 0.000198325 | 0.002237874      | 0.517084915 |
| C12orf65  | 0.214501888     | 3.794820134        | 4.028299955  | 0.000130964 | 0.001569483      | 0.510249968 |
| CDC25A    | 0.399070128     | 0.880466049        | 3.920216156  | 0.000190781 | 0.002165728      | 0.50972216  |
| RYBP      | 0.233029611     | 6.500205438        | 4.078547794  | 0.000109737 | 0.001360561      | 0.50873784  |
| DTX3      | -0.325241848    | 3.36981797         | -4.033405931 | 0.000128639 | 0.001550251      | 0.504148826 |
| SHOC2     | 0.186034073     | 6.195389656        | 4.077139759  | 0.000110284 | 0.001366217      | 0.503216404 |
| RIPK1     | 0.26056912      | 5.697796634        | 4.073727158  | 0.000111621 | 0.001379371      | 0.502884966 |
| ZNF302    | -0.211481874    | 3.694286859        | -4.02522349  | 0.000132384 | 0.001582728      | 0.494829397 |

| Gene         | Log fold change | Average Expression | t            | P-value     | Adjusted P-value | B           |
|--------------|-----------------|--------------------|--------------|-------------|------------------|-------------|
| PRDM1        | 0.370635265     | 2.905438371        | 3.97778571   | 0.00015625  | 0.001817573      | 0.494447111 |
| HSPA9        | 0.169638172     | 7.963854464        | 4.065041919  | 0.000115093 | 0.001413758      | 0.488394144 |
| MDF1         | -0.919969525    | -1.067412876       | -3.875273767 | 0.000222704 | 0.002470413      | 0.486768275 |
| SP2          | 0.156762421     | 4.278478648        | 4.049301198  | 0.000121652 | 0.001481222      | 0.483713748 |
| MYO18A       | -0.302373758    | 5.548280822        | -4.0666714   | 0.000114433 | 0.001409506      | 0.481833652 |
| ACBD3        | 0.253616144     | 6.316487821        | 4.070277881  | 0.000112987 | 0.001393973      | 0.480535142 |
| CEP97        | -0.415262866    | 2.411152724        | -3.95014219  | 0.000172008 | 0.001976449      | 0.47021093  |
| FUBP1        | 0.17836626      | 4.945938243        | 4.047693928  | 0.000122341 | 0.001483855      | 0.470140009 |
| ELOC         | 0.204357054     | 4.837466015        | 4.04696457   | 0.000122655 | 0.001486278      | 0.464749987 |
| FIP1L1       | -0.189316297    | 4.10237616         | -4.031317509 | 0.000129585 | 0.001556673      | 0.455762792 |
| GTF3C1       | -0.207263641    | 6.791653748        | -4.06259398  | 0.00011609  | 0.001424086      | 0.454914522 |
| ZNF200       | 0.226174326     | 2.57223761         | 3.962332531  | 0.00016488  | 0.001903256      | 0.454887292 |
| MED8         | 0.179355195     | 4.879836598        | 4.045956122  | 0.000123091 | 0.001488157      | 0.450318723 |
| ZFP1         | 0.241930511     | 3.641875227        | 4.00069707   | 0.000144249 | 0.001697634      | 0.447572406 |
| ABHD17C      | 0.262054765     | 4.770395607        | 4.046609762  | 0.000122808 | 0.001486278      | 0.447139582 |
| UBA2         | 0.117574772     | 6.268977779        | 4.059095529  | 0.000117529 | 0.001437065      | 0.444280788 |
| PDHX         | 0.199140927     | 3.900564038        | 4.016033428  | 0.000136716 | 0.001625485      | 0.444120687 |
| ERCC6L       | -0.55011009     | 0.655590292        | -3.87697856  | 0.000221405 | 0.002457812      | 0.435172592 |
| SRSF6        | -0.209276138    | 6.611087388        | -4.053372362 | 0.000119922 | 0.001462816      | 0.434864393 |
| BUB3         | 0.121388493     | 5.913684245        | 4.048658315  | 0.000121927 | 0.001481222      | 0.414054115 |
| PQLC3        | 0.140857874     | 5.046220158        | 4.036449022  | 0.000127272 | 0.001537469      | 0.412260969 |
| RADIL        | -0.35101614     | 1.702855776        | -3.93488366  | 0.000181347 | 0.00207112       | 0.411460271 |
| HOXA3        | 0.923448425     | -1.167107374       | 3.85413113   | 0.000239434 | 0.002638507      | 0.409676842 |
| CASS4        | -0.718562284    | -0.116655205       | -3.881917514 | 0.000217683 | 0.002422323      | 0.404473274 |
| ZNF570       | 0.257913966     | 2.759312047        | 3.946545583  | 0.000174167 | 0.001995168      | 0.400491013 |
| A1BG-AS1     | -0.358377377    | 1.004890103        | -3.88185929  | 0.000217726 | 0.002422323      | 0.383451865 |
| MLPH         | -0.327125592    | 3.889289554        | -4.003880283 | 0.000142654 | 0.001684118      | 0.374438466 |
| C19orf54     | -0.227283464    | 3.665688171        | -3.992075126 | 0.000148658 | 0.001735955      | 0.371565613 |
| UBLCP1       | 0.122303505     | 5.446547923        | 4.028545162  | 0.000130851 | 0.001569382      | 0.367847168 |
| PRPS1        | 0.201499729     | 4.782255121        | 4.008619328  | 0.000140309 | 0.001659043      | 0.364868548 |
| ZNF197       | 0.149280141     | 4.242434337        | 3.997245265  | 0.000145999 | 0.001712873      | 0.361026267 |
| CCT6A        | 0.094029672     | 7.47940173         | 4.029818658  | 0.000130268 | 0.001563633      | 0.356042935 |
| ITPKB        | -0.326730498    | 5.139715522        | -4.015768792 | 0.000136843 | 0.001625708      | 0.355758365 |
| ZNF267       | 0.229385918     | 2.918769342        | 3.947604335  | 0.000173528 | 0.001990885      | 0.355423133 |
| ATP6V1G1     | 0.188780715     | 6.297530766        | 4.032650361  | 0.00012898  | 0.001553125      | 0.355367617 |
| HERC1        | -0.382842575    | 5.352645226        | -4.022105897 | 0.000133839 | 0.001597581      | 0.342882925 |
| CCNL2        | 0.462053931     | 3.707936549        | 3.978823057  | 0.000155687 | 0.001812418      | 0.341838838 |
| BLOC1S6      | 0.109012873     | 6.245480963        | 4.026947726  | 0.000131586 | 0.00157569       | 0.336892324 |
| PPP1R26-AS1  | -0.792741388    | -1.961822702       | -3.826348659 | 0.000263253 | 0.002855031      | 0.332385113 |
| ZFX          | -0.2881339      | 3.978591808        | -3.992158822 | 0.000148614 | 0.001735955      | 0.327655359 |
| YWHAZ        | 0.091830961     | 7.800624245        | 4.017439265  | 0.000136045 | 0.00161878       | 0.327445266 |
| SNX18        | -0.135215171    | 7.138421275        | -4.018873138 | 0.000135363 | 0.001612508      | 0.322833559 |
| SLC45A3      | -0.832263762    | -1.00566008        | -3.820402027 | 0.000268637 | 0.002894671      | 0.32250728  |
| FKBP15       | -0.104781415    | 5.791505548        | -4.02040434  | 0.000134639 | 0.001605861      | 0.321536126 |
| TBX18        | -0.291641454    | 5.079114307        | -4.008967936 | 0.000140138 | 0.001658323      | 0.314416413 |
| PCGF6        | 0.169218674     | 3.161304496        | 3.946903093  | 0.000173951 | 0.001994213      | 0.312246051 |
| IPO13        | -0.173560604    | 5.390031406        | -4.010643165 | 0.00013932  | 0.001652528      | 0.311041087 |
| NR3C2        | -0.569708758    | 0.149523791        | -3.840475787 | 0.000250872 | 0.002754467      | 0.304372243 |
| HMGB1        | 0.117904443     | 5.538671305        | 4.008256097  | 0.000140488 | 0.001659849      | 0.29411341  |
| DEGS1        | 0.112597001     | 6.850436318        | 4.01158864   | 0.000138859 | 0.001648368      | 0.283934515 |
| CFLAR        | -0.175601857    | 5.308854358        | -4.003298465 | 0.000142944 | 0.001686225      | 0.280734853 |
| CEP44        | -0.280082833    | 2.032430252        | -3.904114592 | 0.000201678 | 0.002268918      | 0.278363331 |
| PGRMC2       | 0.110555781     | 7.7403914          | 4.002122772  | 0.000143533 | 0.001690519      | 0.273881942 |
| RREB1        | -0.286524401    | 4.55708321         | -3.979224401 | 0.000155469 | 0.001811285      | 0.273644123 |
| BIRC2        | -0.132020383    | 5.093170556        | -3.996069594 | 0.0001466   | 0.001718581      | 0.264195819 |
| KBTBD3       | -0.397756575    | 0.913111859        | -3.831496833 | 0.000258675 | 0.002818163      | 0.264076314 |
| RAB1A        | 0.107049876     | 7.590318183        | 3.998729158  | 0.000145244 | 0.001706678      | 0.259840862 |
| NECAP1       | 0.190436679     | 3.99896151         | 3.968070077  | 0.000161624 | 0.00186997       | 0.259189132 |
| ZC3H10       | 0.218079806     | 2.723872693        | 3.905196648  | 0.000200928 | 0.002262163      | 0.251337093 |
| SZRD1        | 0.089300824     | 7.330369903        | 3.99778598   | 0.000145724 | 0.001710974      | 0.246862033 |
| PACS1        | -0.143842982    | 7.657991954        | -3.993920189 | 0.000147704 | 0.001728834      | 0.246853928 |
| WDR31        | -0.468652724    | 2.020068549        | -3.885489059 | 0.000215028 | 0.002397616      | 0.239754143 |
| PTPN2        | 0.206180409     | 4.175902352        | 3.955419237  | 0.000168887 | 0.00194355       | 0.219222061 |
| PTCD2        | -0.204464434    | 3.562691802        | -3.934267647 | 0.000181734 | 0.002073968      | 0.217215381 |
| YAF2         | 0.198490761     | 3.825695567        | 3.942127741  | 0.000176854 | 0.002024413      | 0.214438276 |
| AP4E1        | -0.246892409    | 3.461251882        | -3.936116756 | 0.000180574 | 0.002063863      | 0.208385575 |
| COPS3        | 0.120763596     | 5.777447848        | 3.980846148  | 0.000154594 | 0.001802475      | 0.193709494 |
| NRAV         | -0.264733687    | 2.256918932        | -3.873279791 | 0.000224233 | 0.00248554       | 0.191499948 |
| LOC101927751 | -0.281170725    | 1.771930318        | -3.843983821 | 0.000247884 | 0.002723655      | 0.179343623 |
| TMEM33       | 0.123928672     | 5.441532648        | 3.972598225  | 0.000159098 | 0.001844995      | 0.178036274 |

| Gene      | Log fold change | Average Expression | t            | P-value     | Adjusted P-value | B            |
|-----------|-----------------|--------------------|--------------|-------------|------------------|--------------|
| NHLRC2    | -0.219715059    | 3.491415516        | -3.927798301 | 0.000185847 | 0.002112902      | 0.174996328  |
| SYNCRIP   | 0.217584082     | 7.560640125        | 3.973196234  | 0.000158767 | 0.001842578      | 0.171711298  |
| PDE4A     | -0.15592307     | 5.300197869        | -3.969331465 | 0.000160916 | 0.001863215      | 0.169105148  |
| BCLAF1    | 0.144857073     | 6.371033063        | 3.975581573  | 0.000157454 | 0.001830162      | 0.165314625  |
| SERPINE1  | 0.337376476     | 8.499264123        | 3.956071385  | 0.000168505 | 0.001940638      | 0.151020699  |
| TLN2      | -0.261170708    | 5.974625603        | -3.969665    | 0.00016073  | 0.001862486      | 0.149101906  |
| TUBGCP3   | -0.236212181    | 3.934832066        | -3.927066551 | 0.000186318 | 0.002116657      | 0.146211222  |
| UBIAD1    | 0.145826473     | 3.913843371        | 3.92846817   | 0.000185417 | 0.002109606      | 0.143086422  |
| POLR3F    | 0.194980811     | 3.145935946        | 3.899075945  | 0.000205209 | 0.002300053      | 0.142202687  |
| TSC2      | -0.138265393    | 6.742546647        | -3.96630316  | 0.00016262  | 0.001878608      | 0.134652452  |
| ELOA      | 0.211511558     | 5.499537878        | 3.960652026  | 0.000165845 | 0.001911472      | 0.131674931  |
| STRAP     | 0.094939841     | 7.104749927        | 3.961888823  | 0.000165134 | 0.001904733      | 0.122737258  |
| GDPD1     | -0.672907703    | -1.539302529       | -3.750651674 | 0.000340183 | 0.003500356      | 0.120745868  |
| EIF5A2    | 0.233711332     | 3.784739633        | 3.928906155  | 0.000185136 | 0.002108005      | 0.118666944  |
| TBX15     | -0.250267732    | 5.532146501        | -3.951402211 | 0.000171257 | 0.00196933       | 0.112893401  |
| MRPL50    | 0.159900026     | 3.916816211        | 3.917497408  | 0.00019258  | 0.002182867      | 0.109896763  |
| CAMK2G    | -0.153143081    | 4.859074044        | -3.941477838 | 0.000177253 | 0.002027436      | 0.102026398  |
| TAPT1     | -0.18170052     | 3.457280306        | -3.902997182 | 0.000202456 | 0.002274274      | 0.099831979  |
| ZC3H14    | -0.143963191    | 5.455031886        | -3.948798884 | 0.000172811 | 0.001984166      | 0.098999538  |
| IQSEC2    | -0.160654597    | 3.699378763        | -3.905369976 | 0.000200808 | 0.002262163      | 0.084855689  |
| FAM220A   | -0.14659148     | 4.490923474        | -3.915330879 | 0.000194026 | 0.0021976        | 0.066487037  |
| SLC5A6    | -0.140232161    | 4.130653384        | -3.913960078 | 0.000194946 | 0.002206362      | 0.066277944  |
| ZNF761    | 0.241475734     | 2.969359885        | 3.85502691   | 0.000238702 | 0.00263236       | 0.055284334  |
| PLEKHH3   | -0.269491442    | 3.977505756        | -3.90560842  | 0.000200643 | 0.002262163      | 0.054788027  |
| ZNF830    | 0.19034085      | 3.70060427         | 3.89053565   | 0.000211329 | 0.002358124      | 0.042781973  |
| ZBTB11    | 0.352503675     | 4.296085565        | 3.902115676  | 0.000203072 | 0.002279491      | 0.03736626   |
| KHDRBS1   | 0.101145777     | 7.529479393        | 3.933147154  | 0.00018244  | 0.00208045       | 0.036934275  |
| TGFBR3L   | -0.672553004    | -1.317975754       | -3.71762097  | 0.000380093 | 0.003835041      | 0.025654522  |
| DEPDC1    | -0.477465228    | 1.154009176        | -3.771063227 | 0.000317554 | 0.003296785      | 0.02242833   |
| ZNF285    | 0.394303753     | 0.59023196         | 3.736002188  | 0.000357364 | 0.00364455       | 0.021269942  |
| ARHGAP19  | -0.342734184    | 1.8188705          | -3.800190036 | 0.000287736 | 0.003054587      | 0.01386181   |
| UPF2      | -0.280942945    | 4.398463199        | -3.894479652 | 0.000208482 | 0.00233326       | 0.006864371  |
| FBXO38    | 0.25912153      | 4.555176949        | 3.894823739  | 0.000208235 | 0.002332231      | 0.004152276  |
| SH3RF1    | 0.235572303     | 4.827775463        | 3.918224722  | 0.000192097 | 0.002179032      | -0.003419996 |
| NUDT15    | 0.132706701     | 4.03802796         | 3.882845802  | 0.00021699  | 0.0024177        | -0.006540656 |
| METTL4    | -0.268809909    | 2.409535228        | -3.834443583 | 0.000256089 | 0.002801538      | -0.009063965 |
| CASP8AP2  | -0.315576776    | 3.146121476        | -3.834074844 | 0.000256411 | 0.002802061      | -0.017666843 |
| LIMK2     | -0.31983246     | 2.994397414        | -3.830024382 | 0.000259976 | 0.002829683      | -0.018562583 |
| IL16      | -0.410403862    | 2.26459542         | -3.804627478 | 0.000283435 | 0.003024778      | -0.02197732  |
| PPM1F     | -0.132503108    | 5.294571103        | -3.913291256 | 0.000195397 | 0.002206487      | -0.023009387 |
| MBD4      | 0.199264173     | 4.572653923        | 3.892600604  | 0.000209834 | 0.00234462       | -0.026030582 |
| ANGEL2    | -0.206932453    | 3.283376412        | -3.880091671 | 0.000219052 | 0.002435274      | -0.026772185 |
| RTL3      | 0.850848488     | -1.789153179       | 3.705804895  | 0.000395424 | 0.003963184      | -0.029546155 |
| MTERF1    | -0.238621059    | 2.364149649        | -3.802665455 | 0.000285329 | 0.003035452      | -0.034876355 |
| FPGT      | -0.247421654    | 2.509175138        | -3.80996095  | 0.000278347 | 0.002982231      | -0.036315519 |
| GIMAP2    | -0.319155044    | 1.522767657        | -3.770015476 | 0.00031868  | 0.003306193      | -0.037299564 |
| SCAP      | -0.121065936    | 6.47084008         | -3.913403679 | 0.000195321 | 0.002206487      | -0.040914227 |
| RASSF9    | -0.751414634    | 0.232516365        | -3.731918202 | 0.000362299 | 0.003685126      | -0.043486079 |
| CISH      | -0.423588708    | 1.286193563        | -3.761183101 | 0.000328322 | 0.003389887      | -0.048303174 |
| USPL1     | 0.332481864     | 3.324164627        | 3.831670463  | 0.000258522 | 0.002818163      | -0.056949451 |
| CYYR1-AS1 | -0.895102158    | -2.384247535       | -3.696808353 | 0.00040749  | 0.004062494      | -0.060710742 |
| NOL4L     | 0.260054507     | 3.283901799        | 3.817383181  | 0.000271411 | 0.002914135      | -0.073323828 |
| EFCAB7    | -0.29935502     | 2.478421091        | -3.809736537 | 0.000278559 | 0.002982384      | -0.073643643 |
| GINM1     | 0.088959187     | 6.495492765        | 3.901877088  | 0.000203239 | 0.002279667      | -0.078466221 |
| MTOR      | -0.185954371    | 5.343318742        | -3.892420817 | 0.000209964 | 0.00234462       | -0.079315858 |
| MON1A     | -0.219441722    | 3.87618841         | -3.853127786 | 0.000240257 | 0.002645642      | -0.086247559 |
| HMBOX1    | -0.330499192    | 1.733916959        | -3.769085652 | 0.000319682 | 0.003314309      | -0.092804412 |
| ZNF691    | 0.317131901     | 1.942852402        | 3.744390637  | 0.000347427 | 0.003556142      | -0.094900582 |
| ZNF135    | -0.242156988    | 2.199776004        | -3.785887725 | 0.000302027 | 0.003182685      | -0.095830426 |
| ZNF213    | -0.202850947    | 4.585731165        | -3.868378537 | 0.000228034 | 0.002523953      | -0.098318567 |
| INCENP    | -0.361329421    | 3.345591548        | -3.818266267 | 0.000270597 | 0.002909541      | -0.102753663 |
| UBE3D     | -0.210154169    | 1.504822569        | -3.748873414 | 0.000342226 | 0.003516571      | -0.105822759 |
| DDX5      | 0.283170611     | 8.4589716          | 3.871416271  | 0.000225671 | 0.002499638      | -0.106382352 |
| SPOUT1    | -0.141452638    | 3.969904111        | -3.851597251 | 0.000241518 | 0.002657583      | -0.119365522 |
| PLK1      | -0.419813366    | 2.51621726         | -3.781940961 | 0.000306089 | 0.003215426      | -0.121909695 |
| TDP1      | -0.210639007    | 2.973059945        | -3.804119532 | 0.000283924 | 0.003024778      | -0.124001838 |
| SLC25A29  | -0.27296289     | 3.189613988        | -3.836070313 | 0.000254672 | 0.002792119      | -0.125603392 |
| MPP2      | -0.333858916    | 1.533555205        | -3.723579968 | 0.000372577 | 0.003769313      | -0.134183576 |
| HNRNPA0   | 0.085899599     | 7.626674593        | 3.878048947  | 0.000220593 | 0.002450604      | -0.137171209 |
| FAM171A2  | -0.211244575    | 3.426736673        | -3.820963253 | 0.000268125 | 0.002891216      | -0.151114367 |

| Gene         | Log fold change | Average Expression | t            | P-value     | Adjusted P-value | B            |
|--------------|-----------------|--------------------|--------------|-------------|------------------|--------------|
| DCAF13       | 0.163364079     | 5.212285439        | 3.862804771  | 0.000232431 | 0.002568843      | -0.158223252 |
| RGS17        | -0.356327733    | 2.180347559        | -3.75069887  | 0.000340129 | 0.003500356      | -0.159310785 |
| RHBDF2       | -0.26833978     | 2.078017259        | -3.749930585 | 0.00034101  | 0.00350647       | -0.169394943 |
| FAM76A       | 0.279121302     | 3.280498601        | 3.799178216  | 0.000288726 | 0.003062932      | -0.189571699 |
| MEDAG        | 0.16906175      | 7.366190119        | 3.865100609  | 0.00023061  | 0.002550591      | -0.189940279 |
| CCDC184      | -0.613697874    | -0.070633309       | -3.6529624   | 0.000471486 | 0.004585193      | -0.191495171 |
| TCEAL1       | 0.211445372     | 3.932958184        | 3.825050886  | 0.000264419 | 0.002861499      | -0.197097363 |
| LOC100507437 | -0.295917368    | 1.334951749        | -3.714758554 | 0.000383754 | 0.003866801      | -0.199096001 |
| AP4M1        | -0.172980325    | 4.05444503         | -3.827871125 | 0.000261891 | 0.002844357      | -0.199758861 |
| SHANK1       | -0.33592839     | 1.732844128        | -3.72276428  | 0.000373598 | 0.003774565      | -0.200739372 |
| EVI5         | 0.241739166     | 3.507121191        | 3.807565909  | 0.000280621 | 0.003000194      | -0.204035728 |
| PDPK1        | -0.197825687    | 3.444171589        | -3.803818276 | 0.000284215 | 0.003025733      | -0.204381006 |
| SDHAF4       | -0.275280669    | 1.40331821         | -3.711760663 | 0.000387624 | 0.003895378      | -0.205778659 |
| PSRC1        | -0.369254623    | 1.280042803        | -3.683739959 | 0.000425643 | 0.004207277      | -0.209432551 |
| ESF1         | 0.198617574     | 4.342996176        | 3.833963253  | 0.000256508 | 0.002802061      | -0.21074803  |
| MLYCD        | -0.194782326    | 2.690383319        | -3.755595939 | 0.000334565 | 0.003449612      | -0.215526982 |
| CARM1        | -0.11190802     | 6.667150074        | -3.859457658 | 0.00023511  | 0.002596549      | -0.216715942 |
| PDXDC1       | -0.167984199    | 6.10472065         | -3.856206206 | 0.000237741 | 0.002623681      | -0.218011345 |
| CLUAP1       | -0.132795718    | 4.459714704        | -3.8348481   | 0.000255735 | 0.002801443      | -0.219750482 |
| ZNF540       | 0.517354739     | -0.293585751       | 3.634521959  | 0.000501163 | 0.004833237      | -0.223063928 |
| GPATCH4      | 0.196106699     | 4.540608158        | 3.831433183  | 0.000258731 | 0.002818163      | -0.225177054 |
| LINC01730    | -1.028478599    | -2.914403468       | -3.649989715 | 0.000476154 | 0.004624621      | -0.22964855  |
| GPCPD1       | -0.268794948    | 3.889916878        | -3.82594935  | 0.000263611 | 0.00285686       | -0.230721248 |
| ZNF222       | 0.273577822     | 1.28902492         | 3.685815894  | 0.000422709 | 0.00418751       | -0.239955522 |
| ZNF175       | -0.265663788    | 3.186162105        | -3.768258764 | 0.000320576 | 0.003321289      | -0.242647925 |
| LPAR6        | -0.32705267     | 2.225548412        | -3.734925093 | 0.000358659 | 0.003650569      | -0.245843215 |
| CCDC96       | 0.392298775     | 0.65396698         | 3.646853359  | 0.000481127 | 0.004660901      | -0.246904056 |
| TNFAIP8      | 0.236021845     | 4.474333226        | 3.822586452  | 0.000266647 | 0.002877344      | -0.249757678 |
| TMEM165      | 0.127214198     | 5.92977197         | 3.845743031  | 0.000246399 | 0.002709314      | -0.250962719 |
| AKAP8L       | -0.221906024    | 4.601314544        | -3.818708976 | 0.000270189 | 0.002907237      | -0.262486694 |
| PHF14        | -0.145816214    | 4.745889535        | -3.824463943 | 0.000264948 | 0.002863111      | -0.268097514 |
| SPEG         | -0.267887041    | 3.758287511        | -3.796341446 | 0.000291517 | 0.003088194      | -0.268632202 |
| FERMT2       | 0.245274498     | 7.023179374        | 3.840212697  | 0.000251097 | 0.002754934      | -0.272172306 |
| ZNHIT6       | 0.166200669     | 5.00331552         | 3.826581712  | 0.000263044 | 0.002854821      | -0.279629724 |
| SPAG16       | 0.189118428     | 3.205763733        | 3.77595894   | 0.000312344 | 0.003265199      | -0.281243601 |
| TNFRSF1B     | 0.386462146     | 4.680945544        | 3.802376359  | 0.000285609 | 0.003036287      | -0.290502055 |
| CERS5        | 0.109954838     | 5.292585804        | 3.825121669  | 0.000264355 | 0.002861499      | -0.293286341 |
| CDC42        | 0.123964348     | 7.037468203        | 3.834666524  | 0.000255894 | 0.002801443      | -0.293487465 |
| ZNF550       | 0.497587947     | 0.584740516        | 3.632943934  | 0.000503783 | 0.004846099      | -0.30129265  |
| TMCO1        | 0.110348859     | 6.341437171        | 3.832851812  | 0.000257482 | 0.002810663      | -0.302065053 |
| LINC00654    | -0.563041573    | 2.361113941        | -3.707388421 | 0.000393336 | 0.003947507      | -0.30512627  |
| DROSHA       | -0.144718217    | 5.288969464        | -3.824541906 | 0.000264878 | 0.002863111      | -0.306495459 |
| PEX13        | -0.173087471    | 3.853787195        | -3.784912351 | 0.000303026 | 0.0031877        | -0.308897822 |
| FEM1B        | 0.202966859     | 6.501327436        | 3.829764299  | 0.000260207 | 0.002830147      | -0.31278959  |
| TBPL1        | 0.140872784     | 3.625621181        | 3.772625535  | 0.000315883 | 0.003290771      | -0.314105915 |
| MOAP1        | 0.187034531     | 3.319403167        | 3.772199654  | 0.000316337 | 0.003290957      | -0.31452386  |
| NYNRIN       | -0.35093686     | 6.251609185        | -3.827987047 | 0.000261787 | 0.002844357      | -0.316473904 |
| PRDM4        | 0.18571847      | 5.248625318        | 3.818724555  | 0.000270175 | 0.002907237      | -0.32213399  |
| UTP15        | 0.171619321     | 3.664211041        | 3.777006946  | 0.000311239 | 0.003258173      | -0.328004664 |
| TRIM62       | 0.210186023     | 2.484961514        | 3.722473238  | 0.000373962 | 0.003775717      | -0.328446922 |
| EIF2A        | 0.129850097     | 6.832751595        | 3.824201932  | 0.000265184 | 0.002863612      | -0.32894892  |
| NFATC4       | -0.168436086    | 7.401243121        | -3.818040535 | 0.000270804 | 0.0029097        | -0.333432134 |
| CASP8        | -0.231839294    | 3.26070826         | -3.764564102 | 0.000324599 | 0.003356043      | -0.335217022 |
| THNSL1       | -0.284924212    | 2.300010293        | -3.686224492 | 0.000422134 | 0.004186322      | -0.341696074 |
| RAB3D        | -0.287066053    | 2.009851896        | -3.677679904 | 0.00043432  | 0.004276209      | -0.341724148 |
| OSBPL5       | -0.162119184    | 5.922964281        | -3.815625617 | 0.000273038 | 0.00292952       | -0.350362478 |
| MUS81        | -0.185614286    | 3.853137396        | -3.77524173  | 0.000313102 | 0.003268587      | -0.351541105 |
| PDP2         | 0.441407108     | 3.563233644        | 3.759636379  | 0.000330039 | 0.003405281      | -0.353865003 |
| LMF1-AS1     | 1.066586083     | -1.941958955       | 3.599584141  | 0.000562324 | 0.005327575      | -0.355465191 |
| POP1         | 0.36075831      | 3.291312245        | 3.735327812  | 0.000358174 | 0.003648099      | -0.365657487 |
| ZRANB2       | -0.179055178    | 4.78909718         | -3.797291315 | 0.000290579 | 0.003080428      | -0.366566556 |
| EIF2S1       | 0.104730059     | 6.274098243        | 3.810621411  | 0.000277723 | 0.002977663      | -0.372365413 |
| FTH1         | -0.278177067    | 9.6883212          | -3.771197675 | 0.00031741  | 0.003296785      | -0.373439342 |
| UTP3         | 0.139194076     | 5.568817662        | 3.807086344  | 0.000281078 | 0.003002953      | -0.374886172 |
| RBBP8        | 0.189273194     | 4.704956907        | 3.788559788  | 0.000299307 | 0.003161822      | -0.375120215 |
| ATMIN        | 0.116474886     | 6.299980029        | 3.809300782  | 0.000278972 | 0.002984682      | -0.377147863 |
| ZNF19        | -0.343277245    | 0.976767761        | -3.618841544 | 0.000527787 | 0.005040924      | -0.38187246  |
| PCDH18       | -0.310208145    | 8.785863844        | -3.785080924 | 0.000302853 | 0.0031877        | -0.384470119 |
| COASY        | -0.18470004     | 5.563466061        | -3.801420019 | 0.000286538 | 0.00304401       | -0.388610443 |
| UBR4         | -0.352642533    | 7.160532738        | -3.804335015 | 0.000283717 | 0.003024778      | -0.388747454 |

| Gene         | Log fold change | Average Expression | t            | P-value     | Adjusted P-value | B            |
|--------------|-----------------|--------------------|--------------|-------------|------------------|--------------|
| EID1         | 0.12047026      | 8.43620879         | 3.788584889  | 0.000299281 | 0.003161822      | -0.390278862 |
| ATP5S        | 0.178648301     | 3.133947629        | 3.724196706  | 0.000371808 | 0.003766586      | -0.392350005 |
| ATG9A        | -0.121469514    | 6.66005752         | -3.804270319 | 0.000283779 | 0.003024778      | -0.394925679 |
| SAT1         | 0.196182245     | 4.677453332        | 3.777386281  | 0.000310841 | 0.00325626       | -0.402245725 |
| NCBP3        | -0.169573178    | 4.854833033        | -3.78856108  | 0.000299306 | 0.003161822      | -0.4031786   |
| FRMD8        | 0.21441221      | 5.402060639        | 3.786834746  | 0.00030106  | 0.003175892      | -0.403189436 |
| MED28        | 0.114352018     | 5.153477237        | 3.785790321  | 0.000302127 | 0.003182685      | -0.40650394  |
| GNL3         | 0.218955327     | 5.852258361        | 3.794733141  | 0.000293111 | 0.003102897      | -0.410859562 |
| PAX9         | 0.847734106     | -0.896166936       | 3.565457921  | 0.000628858 | 0.005862081      | -0.411471126 |
| FMNL3        | -0.15260954     | 5.019458685        | -3.780067468 | 0.000308035 | 0.003231363      | -0.411611974 |
| FAM83D       | -0.407698209    | 1.944522417        | -3.66211752  | 0.000457381 | 0.00447111       | -0.412099354 |
| MTG2         | 0.190644998     | 3.618546554        | 3.744132337  | 0.000347729 | 0.003556142      | -0.413126911 |
| KIF3A        | -0.227256462    | 2.517266485        | -3.701322474 | 0.000401393 | 0.004009978      | -0.41732418  |
| CEP41        | -0.161368389    | 3.512522471        | -3.746788904 | 0.000344635 | 0.003534097      | -0.418375428 |
| MB21D2       | 0.213518128     | 2.723524154        | 3.723722779  | 0.000372399 | 0.003769313      | -0.426155661 |
| TYK2         | -0.113980076    | 5.418678453        | -3.78769837  | 0.000300181 | 0.003168837      | -0.426252153 |
| NEURL4       | -0.24630109     | 2.746374945        | -3.680529133 | 0.00043022  | 0.004241382      | -0.426944709 |
| KCNE3        | -0.408895319    | 0.588583217        | -3.589433202 | 0.000581382 | 0.005471531      | -0.433574649 |
| WDR24        | -0.253256545    | 3.314288337        | -3.727034772 | 0.000368285 | 0.003738445      | -0.43395748  |
| ZNF367       | 0.429106336     | 2.277310962        | 3.686692999  | 0.000421475 | 0.004182543      | -0.435839659 |
| CCDC122      | -0.312275979    | 1.005425036        | -3.628910483 | 0.00051054  | 0.004898586      | -0.437453683 |
| MAT2B        | -0.115124251    | 5.557644376        | -3.782830351 | 0.000305169 | 0.003208001      | -0.43983758  |
| CKAP2L       | -0.443165678    | 1.948047499        | -3.648546213 | 0.000478437 | 0.004637821      | -0.444006441 |
| RNF149       | 0.139408115     | 5.195629643        | 3.775626016  | 0.000312696 | 0.003266608      | -0.44763086  |
| SUSD6        | 0.234737396     | 4.48969887         | 3.764632272  | 0.000324524 | 0.003356043      | -0.451032535 |
| LIG4         | -0.307301376    | 2.907945246        | -3.715677172 | 0.000382575 | 0.003857506      | -0.457044087 |
| FBXO42       | -0.162478187    | 4.369333738        | -3.748328453 | 0.000342854 | 0.003520626      | -0.464598819 |
| LOC100287015 | -0.400579678    | 0.229358543        | -3.578429116 | 0.000602734 | 0.005647308      | -0.464784362 |
| SAMD4A       | 0.293821638     | 5.653654879        | 3.776595901  | 0.000311672 | 0.003260438      | -0.471037124 |
| CAPZA2       | 0.099802878     | 6.722896675        | 3.7801425    | 0.000307957 | 0.003231363      | -0.472396107 |
| LARP4B       | 0.219873041     | 5.082449967        | 3.764228622  | 0.000324966 | 0.00335754       | -0.475574002 |
| DIRAS1       | 0.185459175     | 5.900995055        | 3.772324891  | 0.000316204 | 0.003290957      | -0.479007184 |
| GMPS         | 0.116307894     | 6.378701753        | 3.777500129  | 0.000310721 | 0.00325626       | -0.479196189 |
| ZFAND5       | 0.16851542      | 7.200329575        | 3.771962331  | 0.000316591 | 0.003291324      | -0.482964967 |
| XZDA         | -0.380812716    | 1.458473694        | -3.624676922 | 0.000517725 | 0.004988052      | -0.488120548 |
| HNRNPAB      | 0.154142695     | 6.946159884        | 3.773424552  | 0.000315031 | 0.003284566      | -0.492421562 |
| MED16        | -0.154353252    | 6.164177486        | -3.773388841 | 0.000315069 | 0.003284566      | -0.49280418  |
| GZF1         | -0.188134662    | 4.086421595        | -3.73581894  | 0.000357584 | 0.00364455       | -0.497024323 |
| VAV3         | 0.609702976     | 0.19115105         | 3.548744763  | 0.000664105 | 0.006133707      | -0.502532819 |
| BAZ2B        | -0.332628489    | 3.533817478        | -3.725354836 | 0.000370367 | 0.003757039      | -0.509392058 |
| TNFRSF10B    | 0.209355002     | 6.324581296        | 3.7671133562 | 0.000321796 | 0.003331638      | -0.513827833 |
| RUNX2        | -0.335898558    | 2.692656264        | -3.672996254 | 0.000441141 | 0.004337698      | -0.514270435 |
| PELI3        | -0.187445173    | 4.250853172        | -3.724808875 | 0.000371045 | 0.003761391      | -0.525922289 |
| AAED1        | 0.183341235     | 4.805347277        | 3.747992638  | 0.000343242 | 0.003522207      | -0.527934786 |
| KIAA1586     | 0.177698323     | 3.400579002        | 3.704192579  | 0.000397561 | 0.003979308      | -0.52796596  |
| CCNE1        | 0.342919998     | 1.649013882        | 3.589591371  | 0.00058108  | 0.005471531      | -0.541966206 |
| CKAP2        | -0.281528206    | 4.35669508         | -3.723261096 | 0.000372976 | 0.003770812      | -0.541980816 |
| HDAC11       | -0.177219915    | 3.684941353        | -3.705600564 | 0.000395694 | 0.003963256      | -0.543295012 |
| XIRP1        | 0.799050554     | -0.855075934       | 3.519275032  | 0.000730859 | 0.006632329      | -0.548758807 |
| ISCA1        | 0.184300254     | 3.962800401        | 3.712379908  | 0.000386822 | 0.003889908      | -0.554026835 |
| STK38        | -0.178894863    | 6.380604827        | -3.753092363 | 0.000337399 | 0.003476452      | -0.558666135 |
| VASH1        | -0.326576306    | 3.348798551        | -3.67661249  | 0.000435866 | 0.004288624      | -0.560274545 |
| ELAC1        | -0.251021014    | 2.007886057        | -3.621365481 | 0.000523412 | 0.005002971      | -0.560963928 |
| HNRNPF       | 0.083932855     | 7.818134759        | 3.744204393  | 0.000347645 | 0.003556142      | -0.561394637 |
| TCOF1        | -0.139592563    | 5.330968238        | -3.740086917 | 0.000352492 | 0.003602401      | -0.568327801 |
| HECTD3       | -0.190605029    | 5.712393707        | -3.746011203 | 0.000345538 | 0.003540947      | -0.570333214 |
| DUSP19       | -0.419963335    | 0.057430373        | -3.531555226 | 0.000702305 | 0.006431317      | -0.584663157 |
| ZNF844       | 0.34049315      | 3.017300864        | 3.630121194  | 0.000508503 | 0.004884021      | -0.593727797 |
| CEP19        | -0.238373208    | 2.70982281         | -3.648593433 | 0.000478362 | 0.004637821      | -0.595239077 |
| FAM135A      | -0.326633952    | 2.893839154        | -3.648961606 | 0.000477779 | 0.004637412      | -0.595536894 |
| STEAP1       | 0.176109009     | 5.151362386        | 3.727900725  | 0.000367217 | 0.003730114      | -0.600449358 |
| ACTL10       | 0.481501428     | 0.555872042        | 3.52862767   | 0.000709014 | 0.006473087      | -0.60291389  |
| HMGA2        | 0.328247537     | 4.712937559        | 3.713142112  | 0.000385836 | 0.003883373      | -0.603860807 |
| CUL3         | 0.138815823     | 6.104881029        | 3.737557301  | 0.000355502 | 0.003630695      | -0.60489239  |
| GMNN         | 0.244930467     | 2.78491668         | 3.637244228  | 0.000496673 | 0.004796075      | -0.605648955 |
| MEF2D        | -0.171914632    | 6.216844812        | -3.737201079 | 0.000355927 | 0.003632581      | -0.608473518 |
| NLRX1        | -0.162503032    | 4.660294321        | -3.713081763 | 0.000385914 | 0.003883373      | -0.612164034 |
| KCTD18       | -0.128315689    | 4.381883283        | -3.706512647 | 0.000394489 | 0.003956449      | -0.617041649 |
| DHX30        | 0.12229914      | 5.803751738        | 3.731153824  | 0.00036323  | 0.003692102      | -0.618817708 |
| C17orf49     | 0.764604093     | -2.360228619       | 3.496080177  | 0.000787818 | 0.007064105      | -0.619339201 |

| Gene         | Log fold change | Average Expression | t            | P-value     | Adjusted P-value | B            |
|--------------|-----------------|--------------------|--------------|-------------|------------------|--------------|
| GSDMC        | 1.086252037     | -2.620711979       | 3.510817569  | 0.000751161 | 0.006783865      | -0.622954526 |
| ZNF778       | 0.328845611     | 1.995276026        | 3.598290614  | 0.000564719 | 0.005343546      | -0.62460599  |
| SNN          | 0.238542723     | 4.604633079        | 3.700691946  | 0.000402239 | 0.0040128        | -0.627384712 |
| STK35        | 0.154621291     | 4.38443772         | 3.700859252  | 0.000402014 | 0.0040128        | -0.632328055 |
| PLD1         | -0.227013266    | 3.943127277        | -3.692280882 | 0.000413694 | 0.004116173      | -0.633498136 |
| CENPC        | 0.201256661     | 3.020053265        | 3.660768513  | 0.000459433 | 0.004488265      | -0.635400381 |
| KIAA0513     | -0.248135922    | 4.716627643        | -3.701647783 | 0.000400956 | 0.004009978      | -0.642563547 |
| ORC4         | -0.143764143    | 3.984242962        | -3.685744545 | 0.00042281  | 0.00418751       | -0.643316793 |
| KCNMB2       | 1.055773047     | -3.806498254       | 3.528994154  | 0.000708171 | 0.006469309      | -0.643857591 |
| SOBP         | -0.280226937    | 3.895379749        | -3.670739305 | 0.000444465 | 0.004364678      | -0.646786195 |
| POLM         | -0.178531206    | 3.084189166        | -3.642613288 | 0.000487929 | 0.004717689      | -0.666694026 |
| METTL3       | -0.23462878     | 3.394746689        | -3.660380994 | 0.000460025 | 0.00449113       | -0.667263109 |
| NANOS1       | 0.340696659     | 1.056963896        | 3.536476059  | 0.000691162 | 0.006344704      | -0.667595713 |
| TIGD3        | 0.749091409     | -2.532390607       | 3.473641183  | 0.000846899 | 0.007464911      | -0.672360852 |
| TUBB4B       | 0.157290233     | 7.71777536         | 3.709204784  | 0.000390953 | 0.003926213      | -0.677358289 |
| ZNF865       | -0.191694017    | 4.565038375        | -3.690267639 | 0.000416481 | 0.004135713      | -0.681070777 |
| C20orf24     | -0.302508369    | 2.143175913        | -3.588742555 | 0.000582701 | 0.005478067      | -0.682668945 |
| CD58         | 0.24005558      | 2.784277552        | 3.617007958  | 0.000530986 | 0.005059314      | -0.682950782 |
| CLK1         | -0.433864109    | 3.847084894        | -3.685510541 | 0.000423139 | 0.004188024      | -0.683942679 |
| TMEM41A      | 0.19013422      | 4.098393238        | 3.671581066  | 0.000443222 | 0.004355318      | -0.692759135 |
| LENG8        | 0.316436081     | 4.98386071         | 3.693135972  | 0.000412515 | 0.004109875      | -0.698441416 |
| PPP1R18      | 0.150029353     | 7.447912329        | 3.701299186  | 0.000401424 | 0.004009978      | -0.702815202 |
| CYTH1        | -0.199196539    | 3.982642941        | -3.664145126 | 0.000454311 | 0.004446879      | -0.703919244 |
| PRRT3        | -0.195739978    | 3.141446977        | -3.632565948 | 0.000504413 | 0.004849059      | -0.710887791 |
| JADE2        | -0.253007853    | 5.012797156        | -3.681288358 | 0.000429133 | 0.004233442      | -0.717060334 |
| DOLPP1       | -0.175348416    | 3.067049769        | -3.625626476 | 0.000516106 | 0.004945683      | -0.717455655 |
| TMEM102      | -0.491758262    | -0.124321669       | -3.466811251 | 0.000865698 | 0.007590731      | -0.722437405 |
| FAM206A      | -0.167600448    | 4.070189316        | -3.666085481 | 0.000451393 | 0.004426939      | -0.722909627 |
| DDX56        | 0.154233714     | 5.666117214        | 3.692717895  | 0.000413091 | 0.004112892      | -0.73334337  |
| TROAP        | -0.505403137    | 0.365299328        | -3.479363577 | 0.000831447 | 0.007358937      | -0.737948365 |
| NAXD         | -0.131629906    | 4.455908544        | -3.665847898 | 0.000451749 | 0.004427552      | -0.740591811 |
| SCOC         | 0.105323868     | 5.734836411        | 3.6910046    | 0.000415459 | 0.004128282      | -0.743470879 |
| AAK1         | -0.182995851    | 5.207841955        | -3.682378026 | 0.000427579 | 0.00422087       | -0.74548064  |
| NFX1         | 0.198715389     | 5.489925388        | 3.684649112  | 0.000424356 | 0.004197306      | -0.748924185 |
| ZNF146       | -0.131230085    | 6.125853466        | -3.691417619 | 0.000414887 | 0.004125319      | -0.749880977 |
| ALG10B       | -0.35016712     | 1.2437188          | -3.523297695 | 0.000721387 | 0.006558219      | -0.753059671 |
| PBX2         | -0.167449916    | 4.079631485        | -3.655089475 | 0.000468172 | 0.004561803      | -0.754832617 |
| PPARGC1B     | 1.078404593     | -0.028967557       | 3.437706234  | 0.000950319 | 0.008152391      | -0.767589185 |
| FRS3         | 0.376804141     | 0.837418872        | 3.481501157  | 0.000825743 | 0.007321361      | -0.772580308 |
| PIGV         | -0.141196622    | 3.860513859        | -3.64383527  | 0.000485959 | 0.004704686      | -0.778834825 |
| CCDC71L      | -0.206207567    | 5.848646176        | -3.683134117 | 0.000426503 | 0.004213013      | -0.780287369 |
| CRIPAK       | -0.262791065    | 1.610560491        | -3.541070368 | 0.00068091  | 0.006277369      | -0.780813676 |
| NKX6-1       | 1.27454655      | -3.175666375       | 3.45664152   | 0.000894422 | 0.007790909      | -0.791804209 |
| TRPC4AP      | -0.08705982     | 6.708240617        | -3.679074678 | 0.000432308 | 0.004259184      | -0.792606943 |
| ZC3H18       | -0.127982057    | 5.702953738        | -3.667324533 | 0.000449538 | 0.004411623      | -0.81240509  |
| TCEANC       | -0.314239575    | 1.088634756        | -3.481031286 | 0.000826994 | 0.007328136      | -0.814972356 |
| DBT          | -0.257047447    | 4.169513683        | -3.630005096 | 0.000508698 | 0.004884021      | -0.815885374 |
| YPEL4        | -0.419650728    | 0.818629285        | -3.472064256 | 0.000851205 | 0.007494186      | -0.82363052  |
| GUCA1B       | 0.763682692     | -2.404410582       | 3.426116309  | 0.000986143 | 0.008402292      | -0.82546195  |
| TMEM99       | -0.210996027    | 3.055567953        | -3.5924907   | 0.000575578 | 0.005432648      | -0.826706989 |
| C19orf47     | -0.178466887    | 3.132017227        | -3.590262963 | 0.000579801 | 0.005465662      | -0.829093749 |
| SMG5         | -0.134180208    | 6.349584286        | -3.665536362 | 0.000452217 | 0.004429255      | -0.834209187 |
| E4F1         | 0.216178449     | 3.94422207         | 3.615329247  | 0.000533932 | 0.005084163      | -0.835746203 |
| HK2          | 0.300739672     | 5.150617754        | 3.654127676  | 0.000469668 | 0.004573202      | -0.836586159 |
| LOC100507487 | -1.062248581    | -2.74999914        | -3.428674582 | 0.000978127 | 0.008338713      | -0.837116517 |
| UGDH         | 0.255979456     | 6.882504833        | 3.663765135  | 0.000454885 | 0.004449603      | -0.840149195 |
| IRF2         | -0.210278097    | 4.386041064        | -3.618664617 | 0.000528094 | 0.005040924      | -0.841916575 |
| CNTROB       | -0.124024864    | 4.247171677        | -3.624056502 | 0.000518786 | 0.004965056      | -0.848098035 |
| OGFOD1       | 0.083286127     | 5.492906174        | 3.651988679  | 0.00047301  | 0.004597049      | -0.848331878 |
| RRAGC        | 0.112739557     | 5.70905231         | 3.655902234  | 0.000466912 | 0.004552467      | -0.850815571 |
| METTL9       | 0.099312607     | 7.60645305         | 3.653946957  | 0.000469949 | 0.004573202      | -0.852583354 |
| PIM2         | -0.322511606    | 0.23449648         | -3.437261476 | 0.00095167  | 0.008159341      | -0.856833602 |
| SSB          | 0.113876273     | 6.178630201        | 3.65672454   | 0.00046564  | 0.004543008      | -0.858984605 |
| PSMA3-AS1    | -0.218605264    | 3.384152676        | -3.598762862 | 0.000563843 | 0.005338614      | -0.862887435 |
| RDH10        | 0.367171495     | 5.265234993        | 3.643620088  | 0.000486306 | 0.004705014      | -0.863604957 |
| RRAGB        | 0.119424859     | 4.177897338        | 3.618159774  | 0.000528974 | 0.005043333      | -0.867990564 |
| CHST11       | -0.249994338    | 4.821501503        | -3.633434505 | 0.000502967 | 0.004844436      | -0.871986466 |
| NGDN         | 0.200991055     | 3.945085642        | 3.61375327   | 0.000536711 | 0.005104175      | -0.875263486 |
| CEP89        | -0.105662309    | 4.945028248        | -3.633859958 | 0.000502261 | 0.004840725      | -0.8901607   |
| RNF13        | 0.132009746     | 5.3361542          | 3.635922467  | 0.000498848 | 0.004813995      | -0.898926986 |

| Gene       | Log fold change | Average Expression | t            | P-value     | Adjusted P-value | B            |
|------------|-----------------|--------------------|--------------|-------------|------------------|--------------|
| ZNRD1ASP   | -0.401129753    | 0.092261738        | -3.423535877 | 0.00099429  | 0.008457362      | -0.901449877 |
| PIWIL4     | 0.260881492     | 0.880955881        | 3.451572894  | 0.000909072 | 0.007870599      | -0.907457472 |
| OAT        | 0.114797531     | 6.839568747        | 3.641979474  | 0.000488953 | 0.004724563      | -0.908657043 |
| SYNGAP1    | -0.206274622    | 4.851559453        | -3.623568393 | 0.000519623 | 0.004969901      | -0.91176011  |
| FAM43B     | 0.614933576     | 0.57853369         | 3.408869014  | 0.001041821 | 0.008759724      | -0.913534193 |
| PDSS1      | 0.277590978     | 0.98684054         | 3.448681515  | 0.00091753  | 0.007925273      | -0.914812206 |
| TMEM186    | 0.244127466     | 2.006473378        | 3.49584325   | 0.000788421 | 0.007065306      | -0.916014983 |
| SLC7A6OS   | -0.227079636    | 1.925921067        | -3.500163001 | 0.000777497 | 0.006979864      | -0.916101409 |
| HSPA1L     | -0.376707595    | 1.072949412        | -3.452849418 | 0.000905361 | 0.007857738      | -0.916200801 |
| LGALS1     | 0.318931886     | 1.11872247         | 3.454496583  | 0.000900594 | 0.00783288       | -0.922689942 |
| SSR4P1     | -0.285990014    | 0.804414384        | -3.453926628 | 0.000902241 | 0.007838153      | -0.931208895 |
| SLC30A7    | 0.287838965     | 4.844415108        | 3.612482516  | 0.000538962 | 0.005122349      | -0.933420075 |
| DES12      | 0.113543426     | 6.288614033        | 3.63318232   | 0.000503387 | 0.004845377      | -0.93484706  |
| CSPP1      | -0.314532797    | 2.465144389        | -3.511842547 | 0.000748672 | 0.006765447      | -0.939188302 |
| LRCH4      | -0.243091457    | 1.902587643        | -3.474802449 | 0.000843742 | 0.007454617      | -0.943709064 |
| BMP2K      | 0.290823678     | 4.45940182         | 3.594497637  | 0.000571798 | 0.005400356      | -0.947051994 |
| LARP6      | -0.187267379    | 6.023138944        | -3.627505412 | 0.000512914 | 0.004918232      | -0.949121938 |
| ZNF684     | 0.282113938     | 0.944421946        | 3.424090878  | 0.000992533 | 0.008451956      | -0.949914714 |
| MICB       | 0.205083008     | 3.198606848        | 3.551934661  | 0.000657236 | 0.006085192      | -0.950867001 |
| PLEKHM3    | -0.765173263    | 1.354540286        | -3.456542698 | 0.000894705 | 0.007790909      | -0.951294415 |
| FCHSD1     | -0.152472886    | 3.354522758        | -3.563545569 | 0.0006328   | 0.005895173      | -0.951616784 |
| INTS12     | -0.186456884    | 3.302353584        | -3.562877278 | 0.000634182 | 0.005900756      | -0.95379171  |
| LOC339803  | -0.213782501    | 2.880300681        | -3.537503483 | 0.000688856 | 0.006331258      | -0.955558901 |
| CA13       | 0.411455875     | -0.074054749       | 3.402021805  | 0.001064737 | 0.008915619      | -0.956987707 |
| HSPA4L     | 0.282787271     | 3.94770276         | 3.578385862  | 0.000602819 | 0.005647308      | -0.95908913  |
| MKI67      | -0.460409792    | 4.849061925        | -3.601196377 | 0.000559352 | 0.005306093      | -0.966795245 |
| SLC10A7    | -0.316484636    | 2.498672128        | -3.512522334 | 0.000747026 | 0.006754624      | -0.969002434 |
| RNPS1      | 0.186332723     | 4.740413378        | 3.600461991  | 0.000560704 | 0.00531557       | -0.969192925 |
| AP3D1      | -0.081104891    | 7.646589936        | -3.614957211 | 0.000534586 | 0.005087183      | -0.97319315  |
| SPHK2      | -0.163193635    | 3.92285909         | -3.574176829 | 0.000611183 | 0.005711449      | -0.980194414 |
| TRMT6      | 0.15086646      | 3.625830464        | 3.570338523  | 0.000618905 | 0.005772872      | -0.980840284 |
| SIMC1      | -0.170843182    | 2.980542985        | -3.516032137 | 0.000738582 | 0.006690314      | -0.98132684  |
| CAD        | -0.215043715    | 6.645161738        | -3.618496742 | 0.000528387 | 0.005040924      | -0.981941337 |
| THUMP2     | 0.20139434      | 2.230181835        | 3.491692819  | 0.000799054 | 0.007147835      | -0.983186467 |
| SLF2       | 0.363645894     | 4.12250508         | 3.555066257  | 0.000650559 | 0.006027071      | -0.987613539 |
| LMCD1-AS1  | 0.550308058     | -1.909489508       | 3.354483567  | 0.001237437 | 0.01010887       | -0.98995841  |
| LRRC75A    | -0.344848271    | 0.680528764        | -3.400283947 | 0.001070628 | 0.008954995      | -0.990363581 |
| TXLNA      | 0.183243186     | 6.442660258        | 3.611406405  | 0.000540875 | 0.005137291      | -1.004109731 |
| LDLRAP1    | -0.151995419    | 4.813476688        | -3.591609291 | 0.000577245 | 0.005444976      | -1.007959539 |
| ARFIP2     | 0.156197741     | 5.647709604        | 3.602581372  | 0.000556811 | 0.005285317      | -1.009320323 |
| RAET1E-AS1 | -0.79847162     | -1.126627725       | -3.347748727 | 0.001263938 | 0.010297438      | -1.014197068 |
| RAD18      | -0.196560281    | 3.169758225        | -3.536517013 | 0.00069107  | 0.006344704      | -1.018874528 |
| FXR2       | 0.187055768     | 4.713731346        | 3.581576229  | 0.000596553 | 0.005599046      | -1.018875368 |
| ZNF439     | -0.290214338    | 1.203985104        | -3.423141786 | 0.00099554  | 0.008463215      | -1.020143867 |
| FAM222B    | 0.157436252     | 4.066181935        | 3.557893452  | 0.000644586 | 0.005979087      | -1.021437715 |
| SPECC1L    | -0.100625125    | 4.939726071        | -3.588619704 | 0.000582936 | 0.005478067      | -1.023765749 |
| RRAS2      | 0.185714236     | 5.5924253          | 3.596933275  | 0.000567243 | 0.005360692      | -1.025581442 |
| BRD1       | 0.162640029     | 4.58020464         | 3.579424862  | 0.000600772 | 0.005635134      | -1.026782556 |
| TSPY26P    | -0.225129388    | 2.697019713        | -3.489999099 | 0.000803432 | 0.007174218      | -1.030690619 |
| NSD1       | -0.289432449    | 6.039946602        | -3.597067729 | 0.000566992 | 0.005360692      | -1.037651579 |
| GRPEL1     | 0.146467199     | 4.72489272         | 3.577631916  | 0.000604309 | 0.005654234      | -1.049620876 |
| RAD52      | -0.427916318    | 1.081085652        | -3.405080366 | 0.001054442 | 0.008849093      | -1.052548635 |
| SERPINB1   | 0.176483377     | 4.824533827        | 3.575037248  | 0.000609464 | 0.005698925      | -1.056024015 |
| ZNF862     | -0.192319071    | 2.54370972         | -3.479482395 | 0.000831129 | 0.007358937      | -1.057052264 |
| ING3       | -0.196815172    | 3.296731032        | -3.533194251 | 0.000698574 | 0.006401049      | -1.060614304 |
| C11orf96   | 0.492000077     | 2.907265129        | 3.504008208  | 0.000767893 | 0.006897758      | -1.063353751 |
| TSC22D1    | -0.158182603    | 6.756704903        | -3.589364212 | 0.000581514 | 0.005471531      | -1.071658471 |
| VRK1       | 0.206590032     | 2.639781926        | 3.485549791  | 0.000815042 | 0.007252089      | -1.071953363 |
| CDKL5      | -0.413617625    | 2.079311293        | -3.470782465 | 0.00085472  | 0.007520738      | -1.076621821 |
| BLZF1      | 0.152854087     | 4.392075497        | 3.561320148  | 0.000637416 | 0.005923521      | -1.078836126 |
| PON2       | 0.126755318     | 4.188794262        | 3.547559941  | 0.000666673 | 0.006149888      | -1.080460691 |
| TEX10      | 0.249799977     | 5.196076443        | 3.571073451  | 0.000617419 | 0.005625581      | -1.084329731 |
| COMMD10    | 0.153341764     | 3.913162469        | 3.538628284  | 0.000686341 | 0.006311199      | -1.085993372 |
| ZFH3       | -0.273063494    | 4.626410919        | -3.55855728  | 0.000643191 | 0.005969824      | -1.089850696 |
| FLJ31104   | 0.876851771     | -2.937266503       | 3.319891709  | 0.00137933  | 0.011123249      | -1.09094755  |
| UBXN7      | -0.368717623    | 5.592430704        | -3.572246145 | 0.000615056 | 0.005744078      | -1.091069288 |
| SEPT7      | 0.080289296     | 7.540776204        | 3.577814929  | 0.000603947 | 0.005654234      | -1.091965014 |
| ARF6       | 0.150781071     | 6.576744563        | 3.581600144  | 0.000596506 | 0.005599046      | -1.094414225 |
| NECAB3     | -0.197643732    | 3.046172099        | -3.504331013 | 0.000767092 | 0.006894673      | -1.098731774 |
| INSIG1     | 0.333217563     | 8.714058717        | 3.56081973   | 0.000638458 | 0.00592955       | -1.108170423 |



| Gene      | Log fold change | Average Expression | t            | P-value     | Adjusted P-value | B            |
|-----------|-----------------|--------------------|--------------|-------------|------------------|--------------|
| ZNF341    | -0.233048905    | 1.667850405        | -3.415662602 | 0.001019545 | 0.00862338       | -1.108343097 |
| ACBD5     | -0.259664121    | 4.073175166        | -3.529608443 | 0.00070676  | 0.006464256      | -1.115325593 |
| ZMYM1     | -0.35293998     | 2.544237297        | -3.449014303 | 0.000916553 | 0.007921374      | -1.119157494 |
| ZNF672    | 0.134066391     | 4.351264027        | 3.540315975  | 0.000682583 | 0.006286852      | -1.120885864 |
| ZNF30     | 0.335170162     | 1.12247296         | 3.363148318  | 0.001204112 | 0.009884871      | -1.124682609 |
| ZFP90     | -0.219666305    | 4.836887464        | -3.547804668 | 0.000666142 | 0.006148753      | -1.126697648 |
| UBOX5     | 0.190623818     | 3.005105491        | 3.476641588  | 0.000838763 | 0.007414984      | -1.132840988 |
| FAM196A   | 0.540809137     | 0.187746065        | 3.316819651  | 0.001392645 | 0.011206627      | -1.142046935 |
| SIPA1L3   | -0.217309533    | 4.251695845        | -3.526869562 | 0.000713073 | 0.006499355      | -1.143294396 |
| JUND      | 0.25218986      | 7.55623253         | 3.556187458  | 0.000648184 | 0.006008762      | -1.150603542 |
| DCAF6     | 0.093582398     | 6.634705752        | 3.563287033  | 0.000633334 | 0.005896506      | -1.152644019 |
| RIPOR1    | -0.138859269    | 6.619388177        | -3.561414425 | 0.000637219 | 0.005923521      | -1.158377468 |
| ZNF384    | -0.188860776    | 4.066678136        | -3.518228516 | 0.000733343 | 0.00665086       | -1.164459391 |
| TONSL     | -0.212748934    | 2.922356872        | -3.474572901 | 0.000844365 | 0.007455751      | -1.1647516   |
| SGK3      | 0.285323895     | 1.650582015        | 3.403881666  | 0.001058466 | 0.008872971      | -1.166930121 |
| LRRK1     | -0.187580295    | 5.359091257        | -3.549505    | 0.000662462 | 0.006123561      | -1.169059857 |
| RNF113A   | 0.215201942     | 3.388432011        | 3.482570538  | 0.000822904 | 0.007303571      | -1.172206189 |
| KTI12     | 0.162278338     | 3.77299            | 3.509817194  | 0.000753597 | 0.006801791      | -1.176907946 |
| MTAP      | -0.130940653    | 4.571617439        | -3.52720278  | 0.000712302 | 0.006499164      | -1.179141218 |
| SRP19     | 0.164794035     | 2.96270532         | 3.473551029  | 0.000847145 | 0.007464911      | -1.183046363 |
| KMT2E     | -0.257689023    | 5.885080405        | -3.549441031 | 0.0006626   | 0.006123561      | -1.183612343 |
| ST3GAL5   | -0.214225243    | 4.973827767        | -3.534495284 | 0.000695627 | 0.006379719      | -1.183651338 |
| EIF4H     | 0.077398071     | 7.236233068        | 3.550799422  | 0.000659673 | 0.006104001      | -1.184674617 |
| COX15     | -0.129994527    | 4.343680027        | -3.520551851 | 0.00072784  | 0.00660891       | -1.18592442  |
| LLPH      | 0.114938638     | 3.847898578        | 3.505355818  | 0.000764554 | 0.006880072      | -1.188921894 |
| BSN       | -0.583738859    | -0.67694082        | -3.288276748 | 0.001522265 | 0.011987141      | -1.190007561 |
| UNKL      | -0.348395035    | 3.195818427        | -3.461565975 | 0.000880402 | 0.007687208      | -1.192650944 |
| BIVM      | 0.132448524     | 4.074847019        | 3.515499478  | 0.000739857 | 0.006696001      | -1.193654016 |
| POLD1     | -0.200762418    | 3.051519118        | -3.473463123 | 0.000847384 | 0.007464911      | -1.202149727 |
| FAM57A    | 0.152949867     | 5.672719077        | 3.535377111  | 0.000693636 | 0.006363536      | -1.2100414   |
| TPRA1     | -0.154762159    | 5.038765604        | -3.52910624  | 0.000707913 | 0.006469309      | -1.211260054 |
| MIEF2     | -0.193468014    | 2.934980279        | -3.43903528  | 0.00094629  | 0.008139735      | -1.21312569  |
| MED25     | -0.159563902    | 4.946566717        | -3.526448241 | 0.000714049 | 0.006499355      | -1.217600544 |
| MED20     | -0.128421428    | 3.960890266        | -3.49541131  | 0.000789522 | 0.00707096       | -1.217976522 |
| RNF20     | -0.164463451    | 6.005749965        | -3.54023048  | 0.000682773 | 0.006286852      | -1.21810348  |
| LARP1B    | 0.223374466     | 3.519557152        | 3.467335149  | 0.000864242 | 0.007583351      | -1.224410721 |
| OCIAD1    | 0.111568508     | 6.333449809        | 3.539164616  | 0.000685145 | 0.006304837      | -1.225351859 |
| GTPBP10   | -0.166836447    | 3.97726251         | -3.490121848 | 0.000803114 | 0.007174218      | -1.228438232 |
| ABT1      | 0.141688234     | 4.192474802        | 3.50633765   | 0.00076213  | 0.006862357      | -1.229464792 |
| FNIP2     | 0.36059668      | 4.606094739        | 3.50836667   | 0.000757143 | 0.006825616      | -1.232510473 |
| SLC25A16  | 0.160102769     | 3.449086321        | 3.469926235  | 0.000857076 | 0.007537064      | -1.237040077 |
| ZNF397    | -0.228095985    | 3.327134538        | -3.455398951 | 0.000897993 | 0.007814766      | -1.244455233 |
| SLU7      | 0.095282007     | 5.71957031         | 3.526555102  | 0.000713801 | 0.006499355      | -1.249958083 |
| MAPK14    | -0.231964526    | 5.807045227        | -3.526695083 | 0.000713477 | 0.006499355      | -1.251909179 |
| PLCD4     | -0.248298139    | 1.632737545        | -3.367421128 | 0.001187991 | 0.009773837      | -1.254236897 |
| RERE      | -0.158834769    | 6.509021196        | -3.529993808 | 0.000705876 | 0.006460093      | -1.254429906 |
| STOM      | 0.15984276      | 8.150947027        | 3.516672773  | 0.00073705  | 0.006680457      | -1.2584608   |
| FAM117A   | -0.233459274    | 2.06751341         | -3.390086804 | 0.001105821 | 0.009178013      | -1.261177861 |
| PLEKHA2   | -0.346702431    | 2.4352914          | -3.402541843 | 0.00106298  | 0.008905857      | -1.265931747 |
| REEP5     | 0.085972997     | 6.823210857        | 3.524974785  | 0.000717472 | 0.006526567      | -1.268913581 |
| MARF1     | -0.209001098    | 6.012582346        | -3.522784768 | 0.000722588 | 0.006565178      | -1.27243784  |
| CRY1      | 0.216494737     | 3.768772653        | 3.460181026  | 0.000884324 | 0.007713641      | -1.275343567 |
| MAPKBP1   | -0.204105399    | 3.806661219        | -3.467295249 | 0.000864353 | 0.007583351      | -1.276927478 |
| MITF      | -0.324470597    | 5.007193853        | -3.5051419   | 0.000765083 | 0.006880723      | -1.284885633 |
| FAN1      | -0.3121978      | 3.144398709        | -3.438727283 | 0.000947222 | 0.008139735      | -1.292496685 |
| ZNF84     | -0.178574206    | 4.125316642        | -3.474210718 | 0.000845349 | 0.00746007       | -1.295157819 |
| RAB3IL1   | -0.232821645    | 6.353346769        | -3.515398893 | 0.000740098 | 0.006696001      | -1.298733118 |
| ZBTB34    | 0.287295728     | 3.31421272         | 3.436605396  | 0.000953668 | 0.008167169      | -1.304408233 |
| CCDC43    | 0.162669601     | 3.967051059        | 3.467330187  | 0.000864256 | 0.007583351      | -1.304818896 |
| RBM25     | 0.262771344     | 5.931469036        | 3.50774858   | 0.000758659 | 0.00683519       | -1.306501348 |
| PACSIN2   | -0.123309747    | 5.329703887        | -3.499244576 | 0.000779807 | 0.006996438      | -1.313042951 |
| RAB11FIP3 | 0.108313951     | 6.257405832        | 3.509076668  | 0.000755406 | 0.006814029      | -1.316399533 |
| GPR19     | -1.059707126    | -3.250733345       | -3.246564375 | 0.001732198 | 0.013340402      | -1.317013657 |
| RALGAPA1  | -0.361384661    | 1.56473606         | -3.35102789  | 0.001250969 | 0.010202688      | -1.321583763 |
| RCE1      | 0.191490164     | 2.76371528         | 3.41120421   | 0.001034112 | 0.008723975      | -1.331922731 |
| ALG5      | 0.13894575      | 4.890507061        | 3.483973446  | 0.000819192 | 0.007280422      | -1.334071326 |
| PHOSPHO2  | -0.365392592    | -0.160544988       | -3.263575497 | 0.001643501 | 0.01276828       | -1.336490974 |
| AFG3L2    | 0.13648372      | 4.933753665        | 3.484172244  | 0.000818668 | 0.007280055      | -1.338127967 |
| PARP2     | -0.214508891    | 3.136684638        | -3.417512863 | 0.001013556 | 0.008586182      | -1.343003263 |
| RAB22A    | 0.18074065      | 5.727348109        | 3.495193933  | 0.000790076 | 0.00707172       | -1.344089937 |

| Gene     | Log fold change | Average Expression | t            | P-value     | Adjusted P-value | B            |
|----------|-----------------|--------------------|--------------|-------------|------------------|--------------|
| ABHD8    | -0.199897132    | 3.514860958        | -3.446974652 | 0.000922558 | 0.007964137      | -1.347292231 |
| ZFPL1    | -0.180852654    | 2.518879796        | -3.392910941 | 0.001095967 | 0.009126393      | -1.349284545 |
| FO XK1   | -0.209316605    | 4.84221966         | -3.477793279 | 0.00083566  | 0.007391888      | -1.349358808 |
| CDK17    | -0.170854484    | 5.104212977        | -3.483606916 | 0.000820161 | 0.007284728      | -1.354802756 |
| LIPE     | -0.391051778    | -0.087888788       | -3.255828079 | 0.001683354 | 0.013044265      | -1.356691944 |
| LETM1    | 0.167523821     | 5.232678098        | 3.48243921   | 0.000823252 | 0.007303571      | -1.357114394 |
| CASKIN2  | -0.164352954    | 4.181000156        | -3.446768982 | 0.000923166 | 0.007964818      | -1.358873558 |
| PLEKHJ1  | -0.207199109    | 4.541051096        | -3.466527861 | 0.000866487 | 0.007593225      | -1.3606816   |
| MTA2     | 0.141629868     | 6.256402891        | 3.491274048  | 0.000800135 | 0.007153252      | -1.368362219 |
| PPP1R37  | -0.173303401    | 5.806505945        | -3.488647175 | 0.000806943 | 0.007192776      | -1.368598041 |
| SET      | 0.131445802     | 7.31456681         | 3.489482336  | 0.000804773 | 0.007181928      | -1.369572341 |
| CHMP2B   | 0.120804198     | 5.872034279        | 3.487698446  | 0.000809416 | 0.007206286      | -1.3725914   |
| NMNAT1   | -0.235085556    | 3.275356048        | -3.410850947 | 0.001035275 | 0.008723975      | -1.375655488 |
| CCT5     | 0.103881119     | 7.105139399        | 3.489129146  | 0.00080569  | 0.007185857      | -1.37574641  |
| PAPOLG   | 0.251424816     | 3.32640138         | 3.401647649  | 0.001066003 | 0.008921259      | -1.378138605 |
| KRBA1    | -0.143530012    | 3.374041412        | -3.417376888 | 0.001013995 | 0.008586182      | -1.381456416 |
| DDX21    | 0.447365332     | 6.723208104        | 3.487867842  | 0.000808974 | 0.007206286      | -1.381733818 |
| TMEM140  | -0.155075098    | 4.197240787        | -3.45035388  | 0.000912629 | 0.007896521      | -1.391564028 |
| FBXO36   | 0.317181138     | 1.00004023         | 3.290971792  | 0.001509558 | 0.01189952       | -1.392357882 |
| ZNF473   | 0.207651826     | 2.753484992        | 3.360402475  | 0.00121458  | 0.00994912       | -1.399658527 |
| PRIMPOL  | 0.191262117     | 2.844398578        | 3.410612976  | 0.001036059 | 0.008723975      | -1.400147521 |
| ZNF518B  | -0.169882536    | 3.987994628        | -3.436927656 | 0.000952686 | 0.008163404      | -1.404729307 |
| C1orf35  | -0.233962244    | 2.810993147        | -3.36722733  | 0.001188718 | 0.009774477      | -1.406505783 |
| RAP2C    | 0.137257139     | 4.570085976        | 3.452590207  | 0.000906114 | 0.0078582        | -1.408742    |
| PPP1R2   | 0.158617181     | 5.165773092        | 3.465021798  | 0.000870688 | 0.007625609      | -1.41191191  |
| BCCIP    | 0.175773368     | 5.101670218        | 3.461545792  | 0.000880459 | 0.007687208      | -1.414227334 |
| SIAH2    | 0.145058186     | 4.965326035        | 3.461578489  | 0.000880367 | 0.007687208      | -1.414705052 |
| MTA3     | -0.091685385    | 4.715769842        | -3.456532721 | 0.000894734 | 0.007790909      | -1.415397392 |
| IFIT2    | -0.308095705    | 3.651648148        | -3.391063964 | 0.001102402 | 0.009162275      | -1.420343391 |
| ZNF816   | 0.237594158     | 1.813040892        | 3.299505125  | 0.001469978 | 0.011679191      | -1.423739943 |
| CABYR    | -0.290932868    | 1.147853121        | -3.278129513 | 0.001571015 | 0.012292333      | -1.434823864 |
| B4GALT3  | 0.153765901     | 4.234855032        | 3.432546493  | 0.000966113 | 0.00825966       | -1.440326205 |
| DENND4B  | -0.156297566    | 4.613380725        | -3.444075273 | 0.000931159 | 0.008024588      | -1.44040682  |
| NECTIN4  | 1.19928078      | -3.371736808       | 3.20290086   | 0.001980832 | 0.014924694      | -1.441425075 |
| TMEM184B | -0.122953872    | 6.747069504        | -3.467750324 | 0.00086309  | 0.007583351      | -1.442695378 |
| CNN3     | 0.132552015     | 7.589081643        | 3.463145559  | 0.00087595  | 0.007662779      | -1.442787546 |
| EXOSC3   | 0.216668287     | 3.327195961        | 3.389143046  | 0.001109133 | 0.009200431      | -1.444801258 |
| MAML2    | -0.351031395    | 5.027235201        | -3.451559636 | 0.000909111 | 0.007870599      | -1.448659205 |
| ZNF680   | 0.311878118     | 1.622357902        | 3.278391493  | 0.001569738 | 0.012292333      | -1.449473732 |
| SNHG16   | 0.154911755     | 3.978617504        | 3.42156122   | 0.001000568 | 0.008501161      | -1.449774916 |
| PPP1CC   | 0.081401915     | 6.780655583        | 3.463968575  | 0.000873638 | 0.007646998      | -1.454103108 |
| JADE1    | -0.291318185    | 4.768914087        | -3.442611876 | 0.000935529 | 0.008057635      | -1.455699214 |
| NDP      | -0.434218087    | 0.079561081        | -3.203225259 | 0.001978867 | 0.014924694      | -1.456738397 |
| ZNF256   | -0.205981444    | 1.523130701        | -3.292043353 | 0.001504533 | 0.011878559      | -1.458323311 |
| TTK      | -0.385941723    | 1.632302667        | -3.290548018 | 0.001511549 | 0.011908986      | -1.458440614 |
| KBTBD7   | -0.283253766    | 2.494260473        | -3.326606768 | 0.001350641 | 0.010932864      | -1.458487273 |
| RPP25L   | -0.201057594    | 3.253551134        | -3.386301628 | 0.00111916  | 0.009278499      | -1.458895908 |
| IFT172   | -0.127187708    | 4.487125798        | -3.437730293 | 0.000950246 | 0.008152391      | -1.461764291 |
| HNRNPR   | 0.137761865     | 6.779337103        | 3.461431177  | 0.000880783 | 0.007687208      | -1.462344499 |
| AP5B1    | -0.196781971    | 4.318040318        | -3.429109748 | 0.00097677  | 0.008336578      | -1.464390344 |
| GUSBP1   | 0.268644747     | 2.269807839        | 3.333286879  | 0.001322659 | 0.010740991      | -1.464511396 |
| SKA3     | -0.371925592    | 1.586079697        | -3.296389022 | 0.001484317 | 0.011762098      | -1.466484881 |
| ZNF432   | 0.262260919     | 2.274554503        | 3.316913751  | 0.001392235 | 0.011206627      | -1.472432379 |
| GHITM    | 0.093717108     | 7.171926964        | 3.45398873   | 0.000902061 | 0.007838153      | -1.478002233 |
| PTCD3    | -0.110479629    | 4.867518629        | -3.438788675 | 0.000947036 | 0.008139735      | -1.478661388 |
| DNAJB2   | -0.13207196     | 5.873914115        | -3.452788289 | 0.000905539 | 0.007857738      | -1.478930211 |
| SLC43A1  | -0.198523409    | 5.143887895        | -3.441635191 | 0.000938456 | 0.008078228      | -1.480442302 |
| ZFAND4   | -0.234941545    | 1.284002316        | -3.27266879  | 0.001597853 | 0.012477998      | -1.481523972 |
| AMD1     | 0.258111983     | 5.714381529        | 3.449203357  | 0.000915998 | 0.007921124      | -1.483451562 |
| PKP4     | -0.157505374    | 4.927577169        | -3.429503298 | 0.000975544 | 0.008330834      | -1.484479741 |
| DNAJA2   | 0.120556192     | 6.260292909        | 3.452311351  | 0.000906924 | 0.0078607        | -1.488493167 |
| PRKAG2   | 0.176120119     | 3.4261174674       | 3.382982951  | 0.00113098  | 0.009361036      | -1.488530185 |
| HMGB3    | 0.1446039       | 3.956111096        | 3.395872754  | 0.001085721 | 0.009056361      | -1.497049962 |
| SRSF8    | 0.109113574     | 5.147589372        | 3.437747736  | 0.000950193 | 0.008152391      | -1.498082015 |
| ACTR10   | 0.113606059     | 5.798976479        | 3.445368435  | 0.000927314 | 0.007996024      | -1.49865689  |
| GNAO1    | -0.863094903    | -3.008630529       | -3.165768462 | 0.002218163 | 0.016411795      | -1.499844904 |
| EIF2B2   | -0.122924016    | 4.178484972        | -3.409654071 | 0.001039223 | 0.008745732      | -1.502184234 |
| PAN3     | 0.265455356     | 4.027113539        | 3.399784314  | 0.001072328 | 0.008959261      | -1.503479607 |
| ANKRD30B | 0.950959183     | -4.213295966       | 3.187404394  | 0.002076833 | 0.015472508      | -1.505567035 |
| BORCS7   | 0.15595774      | 4.63798763         | 3.419690691  | 0.001006549 | 0.008537534      | -1.506977863 |

| Gene      | Log fold change | Average Expression | t            | P-value     | Adjusted P-value | B            |
|-----------|-----------------|--------------------|--------------|-------------|------------------|--------------|
| SMCR8     | -0.428688571    | 5.382714889        | -3.434192343 | 0.000961048 | 0.008221026      | -1.514341013 |
| OGFR      | -0.18304749     | 5.633646422        | -3.436198946 | 0.000954907 | 0.008173136      | -1.516731449 |
| CCNL1     | -0.320732518    | 3.900715831        | -3.413776784 | 0.001025683 | 0.008665667      | -1.516959691 |
| VMA21     | 0.339011871     | 4.487561885        | 3.412926948  | 0.00102846  | 0.008684262      | -1.517228307 |
| GRIN2D    | -0.225384814    | 3.994546724        | -3.397893202 | 0.001078783 | 0.009008201      | -1.517827265 |
| HIST1H3H  | -0.478819271    | -0.867889213       | -3.165307083 | 0.002221273 | 0.016426733      | -1.525671354 |
| ORC3      | 0.115092284     | 4.526614994        | 3.410723845  | 0.001035694 | 0.008723975      | -1.528947932 |
| PIGC      | 0.135843667     | 4.423527323        | 3.408800138  | 0.001042049 | 0.008759724      | -1.534804356 |
| COG2      | -0.149752136    | 4.128466955        | -3.39586337  | 0.001085753 | 0.009056361      | -1.53900459  |
| SREK1     | -0.215191711    | 4.518734817        | -3.404113071 | 0.001057688 | 0.008871388      | -1.541829608 |
| RNF26     | -0.116458714    | 5.639421617        | -3.428854912 | 0.000977564 | 0.008338636      | -1.543935106 |
| ZNF718    | -0.339277769    | 1.100889069        | -3.24564446  | 0.00173712  | 0.013364645      | -1.544284337 |
| ZSWIM8    | -0.130123494    | 5.786468215        | -3.430979057 | 0.000970959 | 0.008296389      | -1.547956018 |
| ZNF426    | -0.156659511    | 4.210785597        | -3.392504144 | 0.001097381 | 0.009131589      | -1.550586953 |
| TAF6      | -0.129200286    | 5.16132689         | -3.420400371 | 0.001004276 | 0.008527855      | -1.550619626 |
| ST3GAL2   | -0.125637615    | 5.176286533        | -3.415919254 | 0.001018712 | 0.008621278      | -1.550898309 |
| POLR2A    | -0.16531503     | 7.800904758        | -3.423684763 | 0.000993818 | 0.008457362      | -1.55302724  |
| R3HDM2    | -0.162009595    | 4.580648678        | -3.410807505 | 0.001035418 | 0.008723975      | -1.556663591 |
| EMC2      | 0.18253014      | 4.283682197        | 3.39468638   | 0.001089814 | 0.009080177      | -1.563113775 |
| TMEM216   | 0.160314851     | 3.416335662        | 3.361388585  | 0.001210811 | 0.009923641      | -1.564099742 |
| SLC12A7   | -0.276245395    | 4.13281493         | -3.384541839 | 0.001125413 | 0.009325208      | -1.565528937 |
| CTU1      | 0.2682058       | 1.786189234        | 3.26683377   | 0.001627006 | 0.012659717      | -1.567220198 |
| NSMCE4A   | 0.213055627     | 3.336308814        | 3.356217246  | 0.001230701 | 0.010059292      | -1.569224057 |
| PIK3IP1   | -0.203788054    | 4.790847669        | -3.395248833 | 0.001087872 | 0.00906901       | -1.569296349 |
| LINC00476 | -0.370753201    | 0.787098331        | -3.219896324 | 0.001880327 | 0.014313141      | -1.572856362 |
| ZNF850    | 0.465485024     | -0.549760865       | 3.152145398  | 0.00231171  | 0.016987121      | -1.573629539 |
| TOB2      | 0.299958644     | 6.217899311        | 3.419897129  | 0.001005888 | 0.008536727      | -1.579572788 |
| NDFIP1    | 0.087022267     | 7.22654422         | 3.417708039  | 0.001012926 | 0.008586182      | -1.5848429   |
| SOCS2     | 0.257209588     | 3.663194408        | 3.373321901  | 0.001166062 | 0.009619692      | -1.591295366 |
| POMP      | 0.163412808     | 6.432507223        | 3.415489909  | 0.001020105 | 0.00862338       | -1.599238821 |
| EHD2      | -0.152680826    | 9.578444688        | -3.375676221 | 0.00115742  | 0.009564108      | -1.600510851 |
| CDADC1    | -0.186402987    | 2.738439644        | -3.308988416 | 0.001427136 | 0.011435307      | -1.602124061 |
| PHF19     | -0.110574027    | 4.667771042        | -3.392382889 | 0.001097803 | 0.009131589      | -1.604315099 |
| LINC02154 | -0.79240567     | -1.789050868       | -3.116080667 | 0.002577443 | 0.018532986      | -1.607439067 |
| SELENOK   | 0.204025512     | 4.23003612         | 3.371445376  | 0.001172994 | 0.009666292      | -1.608906421 |
| INHBA     | -0.538063021    | 5.264476187        | -3.399953687 | 0.001071752 | 0.008959261      | -1.61431297  |
| FOXL2     | 0.55183416      | 1.371314136        | 3.195029343  | 0.002029065 | 0.015202767      | -1.61435324  |
| PLCE1     | -0.225137976    | 3.915011839        | -3.363902823 | 0.00120125  | 0.00987214       | -1.617078366 |
| C9orf64   | -0.249481682    | 3.666793248        | -3.35085975  | 0.001251631 | 0.010202688      | -1.61709574  |
| APBB1     | -0.114996527    | 5.818094618        | -3.406867724 | 0.00104847  | 0.008808786      | -1.617214274 |
| MVB12B    | -0.157942613    | 3.617885268        | -3.345475202 | 0.001273004 | 0.010356402      | -1.61779809  |
| FAM193A   | -0.131171891    | 5.061779764        | -3.390976284 | 0.001102709 | 0.009162275      | -1.618547249 |
| RNF216    | -0.179167113    | 6.07979119         | -3.405400945 | 0.001053369 | 0.008845011      | -1.624673389 |
| MYOM1     | -0.319475115    | 0.793481724        | -3.20310483  | 0.001979596 | 0.014924694      | -1.635392247 |
| MAP10     | -0.404015212    | 0.510628169        | -3.155976953 | 0.002285034 | 0.016832151      | -1.650756846 |
| ZFYVE26   | -0.242017681    | 5.078736094        | -3.374587849 | 0.001161407 | 0.009586542      | -1.656939185 |
| MINDY3    | -0.124111813    | 4.385911066        | -3.369639884 | 0.0011797   | 0.009710931      | -1.659289447 |
| SLC27A1   | -0.112350188    | 5.667226714        | -3.39039991  | 0.001104725 | 0.009173966      | -1.662005191 |
| PRDM16    | -0.376824212    | 1.475536908        | -3.223222037 | 0.001861227 | 0.014206979      | -1.662086626 |
| ZC3H6     | -0.253847606    | 2.303811512        | -3.255056878 | 0.001687371 | 0.013055241      | -1.665574974 |
| PITPNM1   | -0.130094272    | 5.305379215        | -3.383053852 | 0.001130726 | 0.009361036      | -1.667629155 |
| MAPK7     | 0.144904929     | 5.236043922        | 3.376102444  | 0.001155861 | 0.009556474      | -1.670754763 |
| C16orf52  | 0.200894444     | 3.663838903        | 3.346767371  | 0.001267844 | 0.010323676      | -1.680092854 |
| FUT4      | -0.160744644    | 2.953472036        | -3.303676832 | 0.001450985 | 0.01155346       | -1.681601125 |
| FGF7      | -0.170497202    | 7.869507631        | -3.374713512 | 0.001160946 | 0.009586542      | -1.687534744 |
| CCL2      | -0.499479792    | 3.15333416         | -3.34407934  | 0.001278601 | 0.010394408      | -1.693716551 |
| CLCN2     | -0.352183608    | 0.556052139        | -3.155642263 | 0.002287352 | 0.016840996      | -1.699277096 |
| ANKRD13D  | -0.242863976    | 3.308202807        | -3.306358043 | 0.0014389   | 0.011498986      | -1.70068648  |
| PURG      | -0.740885434    | -2.249385158       | -3.075622814 | 0.002909307 | 0.020565835      | -1.703427906 |
| SIK3      | -0.267975394    | 4.855741306        | -3.36151943  | 0.001210311 | 0.009923641      | -1.70364404  |
| DARS      | 0.106111237     | 6.240718554        | 3.378226716  | 0.001148125 | 0.009497725      | -1.708539559 |
| ZNF383    | 0.237915911     | 2.763164628        | 3.258919245  | 0.001667346 | 0.012926863      | -1.708552331 |
| RAI1      | -0.224079817    | 5.205463477        | -3.359864922 | 0.001216639 | 0.009960573      | -1.708879353 |
| TMEM220   | 0.196592355     | 2.67591307         | 3.270836885  | 0.001606952 | 0.012531379      | -1.709487859 |
| HNRNPC    | 0.096919046     | 7.630635318        | 3.371550718  | 0.001172604 | 0.009666292      | -1.709853354 |
| ARRB1     | -0.294083702    | 3.742701127        | -3.323094578 | 0.001365576 | 0.011035962      | -1.714235828 |
| GPC3      | 0.124919049     | 3.5916064          | 3.313548816  | 0.001406954 | 0.011297633      | -1.717051465 |
| KCNJ2     | -0.417369663    | 2.402750033        | -3.253202079 | 0.001697067 | 0.013116789      | -1.719622957 |
| RGS19     | -0.216207995    | 2.754193029        | -3.267430254 | 0.001624003 | 0.012642882      | -1.72208947  |
| SPDL1     | 0.249737801     | 4.175339732        | 3.310378201  | 0.001420957 | 0.011391855      | -1.722973795 |

| Gene     | Log fold change | Average Expression | t            | P-value     | Adjusted P-value | B            |
|----------|-----------------|--------------------|--------------|-------------|------------------|--------------|
| CDC23    | -0.124743338    | 4.639632315        | -3.345416746 | 0.001273238 | 0.010356402      | -1.724301572 |
| CAND2    | -0.270979913    | 1.874595508        | -3.218987175 | 0.00188558  | 0.014345644      | -1.732180754 |
| CEBPZ    | 0.136142537     | 5.291372375        | 3.358787092  | 0.001220778 | 0.009983608      | -1.732708069 |
| MTMR1    | -0.157294507    | 3.995062329        | -3.320741173 | 0.00137567  | 0.01110562       | -1.734075791 |
| MINK1    | -0.099306833    | 6.329890778        | -3.370085931 | 0.00117804  | 0.009702567      | -1.734482906 |
| ZNF644   | -0.218255687    | 4.826059528        | -3.35210116  | 0.001246751 | 0.010173924      | -1.735146257 |
| HSPA4    | 0.110903305     | 7.972258295        | 3.359315094  | 0.001218749 | 0.009972426      | -1.738498237 |
| C1QTNF5  | 0.65405165      | -2.102467064       | 3.060802554  | 0.003040521 | 0.021268551      | -1.740740438 |
| DUSP12   | 0.172824967     | 3.221834707        | 3.278503932  | 0.001569191 | 0.012292333      | -1.74105767  |
| AADAT    | 0.16432798      | 2.978891049        | 3.271022747  | 0.001606027 | 0.012531379      | -1.746168622 |
| NOLC1    | 0.161415147     | 6.32100831         | 3.363327986  | 0.00120343  | 0.009884659      | -1.749270349 |
| TCAF2    | 0.321369567     | 0.406844043        | 3.127119839  | 0.002493223 | 0.018013384      | -1.751041765 |
| MBD2     | 0.170648208     | 6.367053915        | 3.361820472  | 0.001209163 | 0.009920935      | -1.757798517 |
| TRAPP5   | -0.300074376    | 0.642809039        | -3.140281072 | 0.002396168 | 0.017522268      | -1.759250348 |
| SC5D     | 0.219751393     | 5.701599662        | 3.352164125  | 0.001246504 | 0.010173924      | -1.760908127 |
| AVL9     | 0.276899326     | 4.248665784        | 3.319968177  | 0.001379    | 0.011123249      | -1.763693938 |
| SPACA6   | 0.325968921     | 0.862671778        | 3.14927514   | 0.002331884 | 0.017101993      | -1.768318287 |
| SHF      | -0.25226241     | 2.182869901        | -3.225019654 | 0.001850979 | 0.014139526      | -1.771504541 |
| DDX52    | -0.098207518    | 4.584066405        | -3.331147829 | 0.00133156  | 0.010801622      | -1.777160252 |
| EGLN3    | 0.430045561     | -0.054739553       | 3.096724682  | 0.002731548 | 0.019436961      | -1.779867591 |
| SCAI     | -0.261293657    | 1.939363906        | -3.203183712 | 0.001979119 | 0.014924694      | -1.784670771 |
| RTN4IP1  | -0.199047358    | 1.690084077        | -3.192322346 | 0.002045905 | 0.015287453      | -1.79040091  |
| ZNF286A  | 0.298858943     | 1.158038215        | 3.132646802  | 0.002452027 | 0.017826898      | -1.790545955 |
| EXO5     | -0.189486101    | 1.803034984        | -3.18204966  | 0.002111005 | 0.015688299      | -1.791963777 |
| TRIM3    | -0.163347589    | 3.978655486        | -3.298022253 | 0.001476785 | 0.011721874      | -1.793837222 |
| BRPF1    | -0.139822059    | 4.330299577        | -3.321306369 | 0.001373239 | 0.011091943      | -1.797198876 |
| NLK      | 0.262395569     | 3.053653591        | 3.250695663  | 0.001710253 | 0.013191632      | -1.798219751 |
| TMEM151A | 0.764998333     | -1.57718837        | 3.038791977  | 0.003245583 | 0.02240187       | -1.79895855  |
| RFT1     | -0.122014273    | 3.875600684        | -3.297061908 | 0.001481209 | 0.011743652      | -1.80080159  |
| IMP3     | 0.167997175     | 4.527337927        | 3.316608099  | 0.001393566 | 0.011206812      | -1.809064757 |
| ATP6V0C  | -0.983640832    | -3.006644284       | -3.032859829 | 0.003303007 | 0.022688783      | -1.814605642 |
| ZNF257   | -0.734813571    | -1.492002864       | -3.031239668 | 0.003318854 | 0.022787246      | -1.816126016 |
| MIR4534  | 0.445677295     | 0.818205472        | 3.131883444  | 0.002457679 | 0.017842154      | -1.817490232 |
| CCL7     | 0.520162206     | -0.937317011       | 3.058603582  | 0.003060453 | 0.021393347      | -1.818455395 |
| TBCE     | 0.111262442     | 4.325117486        | 3.305438272  | 0.001443035 | 0.011525916      | -1.818820919 |
| ZNF639   | -0.097228714    | 4.696835495        | -3.319029169 | 0.001383056 | 0.011147331      | -1.823281122 |
| TRANK1   | -0.290995034    | 4.961295186        | -3.324489682 | 0.001359625 | 0.010993769      | -1.824580717 |
| EWSR1    | 0.158495015     | 6.691778243        | 3.339160948  | 0.001298505 | 0.010550529      | -1.824703523 |
| TRIM24   | -0.188696351    | 4.159617874        | -3.294378332 | 0.001493639 | 0.011823529      | -1.826841557 |
| SNX7     | 0.10813974      | 5.566779264        | 3.33233193   | 0.001326626 | 0.010767397      | -1.827290846 |
| KCTD9    | 0.144162968     | 4.508153883        | 3.308224353  | 0.001430544 | 0.011450431      | -1.829036946 |
| PAK1IP1  | 0.157055219     | 4.538035139        | 3.307766763  | 0.001432588 | 0.011454624      | -1.830316775 |
| RPL22    | 0.081259207     | 7.823038638        | 3.326689802  | 0.00135029  | 0.010932864      | -1.83320703  |
| TRA2A    | 0.200571006     | 4.384637349        | 3.308755881  | 0.001428172 | 0.011437527      | -1.838365706 |
| RFC1     | -0.195435869    | 5.476151334        | -3.324572194 | 0.001359274 | 0.010993769      | -1.839166383 |
| SRSF7    | 0.126500902     | 5.840160264        | 3.328837478  | 0.001341236 | 0.010874261      | -1.84210933  |
| GATA6    | -0.32889562     | 3.580070312        | -3.283139886 | 0.001546764 | 0.012154642      | -1.843501273 |
| LACC1    | 0.213759182     | 3.97253754         | 3.285553262  | 0.001535208 | 0.012076436      | -1.844495298 |
| TADA2A   | -0.206125117    | 3.1718641          | -3.241134095 | 0.001761444 | 0.013531049      | -1.845251266 |
| ARMC1    | -0.10863221     | 4.724083289        | -3.30789189  | 0.001432029 | 0.011454624      | -1.846643507 |
| CDCA2    | -0.243947134    | 2.474291127        | -3.201522828 | 0.001989197 | 0.014967667      | -1.848739566 |
| EDEM1    | 0.245093005     | 4.499252887        | 3.297995887  | 0.001476906 | 0.011721874      | -1.850340287 |
| TMEM11   | 0.196882358     | 4.599675141        | 3.304266401  | 0.001448319 | 0.011543642      | -1.852903575 |
| RTKN     | -0.194444725    | 3.428007467        | -3.238829458 | 0.001773995 | 0.013599726      | -1.853819781 |
| SCCPDH   | 0.129112835     | 6.071304911        | 3.327475986  | 0.001346969 | 0.010914869      | -1.855013748 |
| BRAP     | 0.116477316     | 4.476527364        | 3.294998503  | 0.001490758 | 0.011806927      | -1.856367078 |
| RFX7     | 0.407546229     | 4.621602837        | 3.285106449  | 0.001537341 | 0.012086905      | -1.857944594 |
| GRIPAP1  | -0.158256375    | 4.224814067        | -3.297588316 | 0.001478783 | 0.011730586      | -1.859139879 |
| ZNF337   | 0.404717654     | -0.322842371       | 3.041764643  | 0.003217156 | 0.022307391      | -1.8625895   |
| PPP4R3B  | -0.159691793    | 5.764409841        | -3.318803687 | 0.001384032 | 0.01114923       | -1.869525299 |
| TOGARAM1 | -0.249587278    | 4.21389848         | -3.277439801 | 0.001574382 | 0.012307464      | -1.875376678 |
| PDK1     | 0.223483755     | 3.129504175        | 3.220975338  | 0.00187411  | 0.014280015      | -1.878297432 |
| CHRM3    | -1.02823398     | -2.995110197       | -3.013642442 | 0.00349558  | 0.023740943      | -1.879024979 |
| BEND7    | -0.179138075    | 2.675097587        | -3.199737955 | 0.002000082 | 0.01501956       | -1.879688801 |
| EPN2     | -0.180499923    | 4.422960578        | -3.286727012 | 0.001529617 | 0.012038744      | -1.881605719 |
| TUBA1C   | 0.147584543     | 5.22751852         | 3.304920305  | 0.001445368 | 0.011538436      | -1.881833436 |
| INPP5F   | -0.214130814    | 3.376596262        | -3.245842468 | 0.001736059 | 0.01336331       | -1.881923985 |
| SLC8B1   | -0.116535848    | 5.046309432        | -3.304692582 | 0.001446395 | 0.01154052       | -1.881979904 |
| FASTKD1  | -0.211003856    | 2.62135451         | -3.216447479 | 0.001900327 | 0.014428696      | -1.882124145 |
| LRSAM1   | -0.144815895    | 4.307206016        | -3.29318159  | 0.001499213 | 0.011848977      | -1.883357836 |

| Gene      | Log fold change | Average Expression | t            | P-value     | Adjusted P-value | B            |
|-----------|-----------------|--------------------|--------------|-------------|------------------|--------------|
| WDR92     | -0.242144387    | 1.407645033        | -3.136733061 | 0.002421979 | 0.01767669       | -1.88394007  |
| RASSF1    | -0.175191625    | 4.18009197         | -3.278819947 | 0.001567652 | 0.012292333      | -1.88417368  |
| NAP1L3    | 0.333048874     | 3.108138493        | 3.20986924   | 0.00193903  | 0.014656069      | -1.887663831 |
| SYCE1L    | 1.058575631     | -2.622021914       | 3.000130806  | 0.003637157 | 0.024536558      | -1.889096123 |
| RNF219    | 0.270757757     | 3.222851008        | 3.22761378   | 0.001836283 | 0.014048638      | -1.88992752  |
| SRSF1     | 0.075032777     | 6.552949731        | 3.3164728    | 0.001394156 | 0.011206812      | -1.891634268 |
| PUF60     | 0.130808517     | 6.968540689        | 3.315222465  | 0.001399615 | 0.011244696      | -1.892160257 |
| C18orf54  | -0.284667766    | 2.381912879        | -3.168318187 | 0.002201053 | 0.016301209      | -1.899573064 |
| SLC25A12  | 0.119123883     | 4.308761142        | 3.277002     | 0.001576522 | 0.012317803      | -1.899729958 |
| ZNF773    | -0.252298155    | 1.93856028         | -3.154816904 | 0.00229308  | 0.016866677      | -1.899814371 |
| LZTR1     | -0.095642869    | 5.929044229        | -3.31119978  | 0.001417316 | 0.011368716      | -1.900974707 |
| LRRFIP1   | 0.121590526     | 6.573507517        | 3.311985986  | 0.001413384 | 0.011346877      | -1.90346869  |
| BTF3L4    | 0.157962103     | 4.714338382        | 3.291354699  | 0.001507761 | 0.011894901      | -1.911083652 |
| MAGI2-AS3 | 0.115147333     | 5.659663206        | 3.303570169  | 0.001451468 | 0.01155346       | -1.913148478 |
| TRIM45    | -0.483265383    | -0.656911099       | -3.01695661  | 0.003461643 | 0.023552929      | -1.914951156 |
| ZNF454    | 0.394116932     | 0.024742621        | 3.026944968  | 0.003361203 | 0.0230465        | -1.915071892 |
| CMPK1     | 0.091769298     | 7.418029991        | 3.303485238  | 0.001451852 | 0.01155346       | -1.916383191 |
| KLHL23    | -0.341854721    | 0.203078344        | -3.07307154  | 0.002931513 | 0.020693678      | -1.916463759 |
| RP9       | 0.244936401     | 2.271297772        | 3.171835945  | 0.002177648 | 0.016143747      | -1.919706819 |
| U2SURP    | 0.148083726     | 5.642251186        | 3.302561437  | 0.00145604  | 0.011580671      | -1.921646993 |
| KRTAP2-3  | -0.747431736    | -2.350383303       | -3.002804373 | 0.003608728 | 0.024399406      | -1.922802351 |
| RALGDS    | -0.143427873    | 5.311682924        | -3.293653876 | 0.001497011 | 0.011837782      | -1.924658623 |
| UBE2Q1    | 0.096092734     | 6.170125195        | 3.304382957  | 0.001447793 | 0.011543642      | -1.925223871 |
| POLK      | -0.259168645    | 4.016305578        | -3.255172342 | 0.001686769 | 0.013055241      | -1.92838235  |
| LRIG3     | -0.534323581    | 5.240207661        | -3.278469276 | 0.00156936  | 0.012292333      | -1.9301384   |
| ZBTB20    | -0.499675429    | -0.087222813       | -3.050758987 | 0.003132551 | 0.02182643       | -1.930942392 |
| RRP15     | 0.148339708     | 4.392212933        | 3.270434634  | 0.001608957 | 0.012538709      | -1.933902854 |
| KY        | -0.464577008    | 0.221966586        | -3.03531037  | 0.003279172 | 0.022566216      | -1.934210693 |
| MESDC2    | 0.073383014     | 6.244740162        | 3.300748232  | 0.001464294 | 0.011640171      | -1.935374378 |
| MAGI3     | -0.252306621    | 3.287814589        | -3.221885617 | 0.00186888  | 0.014247374      | -1.936149007 |
| ZNF184    | 0.259427359     | 2.893925777        | 3.181275166  | 0.002115991 | 0.015717599      | -1.937297997 |
| ZNF573    | -0.414299962    | -0.916269618       | -3.00071101  | 0.00363097  | 0.024510349      | -1.937580053 |
| ENTPD6    | -0.112458283    | 5.570013751        | -3.294067395 | 0.001495085 | 0.011828764      | -1.939793507 |
| NIM1K     | -0.383602299    | 0.38019963         | -3.043534461 | 0.003200343 | 0.022247328      | -1.941399473 |
| COG7      | -0.139284277    | 3.509966312        | -3.24362774  | 0.001747957 | 0.013441153      | -1.944120964 |
| TDP2      | -0.105532544    | 5.081066421        | -3.282205706 | 0.001551259 | 0.012183607      | -1.947797202 |
| IQCC      | 0.497062228     | -0.260008813       | 2.998690558  | 0.003652558 | 0.024585403      | -1.950137704 |
| MOCS1     | -0.120373399    | 4.054979883        | -3.249106597 | 0.001718663 | 0.013249714      | -1.95271331  |
| TPX2      | -0.278668726    | 4.630993381        | -3.269596208 | 0.001613142 | 0.012564828      | -1.955029611 |
| CRYZL1    | 0.121798469     | 3.901238723        | 3.241502405  | 0.001759445 | 0.013522595      | -1.956351422 |
| TTI2      | 0.158474397     | 2.609573921        | 3.167487011  | 0.002206617 | 0.016334388      | -1.957491424 |
| LMBR1L    | -0.144384974    | 3.495223172        | -3.218493749 | 0.001888437 | 0.014360127      | -1.957869039 |
| RANGAP1   | -0.109644159    | 6.172595635        | -3.292665901 | 0.001501621 | 0.011861786      | -1.958126826 |
| LRP11     | 0.113909158     | 6.300631085        | 3.291264806  | 0.001508182 | 0.011894901      | -1.963811849 |
| BNIP1     | 0.225722505     | 2.678275508        | 3.182816451  | 0.00210608  | 0.01565942       | -1.967179769 |
| MRPS22    | 0.164171131     | 4.873622982        | 3.270790293  | 0.001607184 | 0.012531379      | -1.969305648 |
| EIF3M     | 0.115629882     | 7.275374653        | 3.279692668  | 0.001563411 | 0.012272656      | -1.98990747  |
| FAM118A   | -0.333326514    | 3.040491252        | -3.187115453 | 0.002078664 | 0.015478492      | -1.990870228 |
| CARF      | -0.242368193    | 1.840824885        | -3.130812149 | 0.002465631 | 0.017874042      | -1.995787135 |
| GGA2      | -0.137401742    | 5.939110342        | -3.27800349  | 0.00157163  | 0.012292333      | -1.997060151 |
| SLC46A1   | -0.239757484    | 0.944624924        | -3.063182887 | 0.003019082 | 0.021163077      | -1.998544126 |
| ARID5A    | 0.263558103     | 4.627939506        | 3.262236631  | 0.001650324 | 0.012814682      | -1.999677716 |
| BZW1      | 0.13309998      | 6.484624259        | 3.278064474  | 0.001571332 | 0.012292333      | -2.001909233 |
| MIR34A    | 0.561846264     | 0.706988747        | 3.041673552  | 0.003218024 | 0.022307391      | -2.002229219 |
| KCNA3     | -0.791118401    | -2.264447449       | -2.970290624 | 0.003968864 | 0.026273993      | -2.005777581 |
| FGF9      | -0.840836363    | -2.102482286       | -2.952088892 | 0.004184726 | 0.027408133      | -2.006662398 |
| KIFC1     | -0.35835124     | 2.426011641        | -3.147398695 | 0.002345161 | 0.017190999      | -2.011702664 |
| SNIP1     | 0.173813834     | 4.299007609        | 3.240251741  | 0.001766239 | 0.013560972      | -2.012451294 |
| TAF6L     | -0.186977185    | 3.110490782        | -3.194955099 | 0.002029525 | 0.015202767      | -2.012633569 |
| MSL3      | -0.103870656    | 4.389343003        | -3.239012447 | 0.001772995 | 0.013598983      | -2.017145033 |
| APOL3     | -0.164376354    | 5.091969825        | -3.25516196  | 0.001686823 | 0.013055241      | -2.023255993 |
| THTPA     | -0.206705497    | 2.226616528        | -3.131948961 | 0.002457193 | 0.017842154      | -2.028316615 |
| THADA     | -0.125880023    | 4.921707282        | -3.251957124 | 0.001703605 | 0.013153822      | -2.032684397 |
| METAP2    | 0.083155903     | 7.028230177        | 3.265186096  | 0.001635327 | 0.012711338      | -2.033715081 |
| NCOA7     | -0.245114453    | 5.010651053        | -3.251055782 | 0.001708353 | 0.013183724      | -2.03430251  |
| FAM131A   | -0.159225104    | 3.045856895        | -3.153915385 | 0.002299351 | 0.01690455       | -2.036154337 |
| CTIF      | -0.148245745    | 6.615018612        | -3.265208546 | 0.001635214 | 0.012711338      | -2.039266569 |
| LINC00667 | 0.186637787     | 4.2086052549       | 3.219890982  | 0.001880358 | 0.014313141      | -2.041529663 |
| PITPNB    | 0.147377265     | 5.925321791        | 3.261461262  | 0.001654288 | 0.012838842      | -2.043554205 |
| ALKBH1    | 0.21748445      | 2.845911141        | 3.155040623  | 0.002291526 | 0.016863482      | -2.053370886 |

| Gene      | Log fold change | Average Expression | t            | P-value     | Adjusted P-value | B            |
|-----------|-----------------|--------------------|--------------|-------------|------------------|--------------|
| ZEB2      | -0.211551221    | 6.709438454        | -3.258932412 | 0.001667278 | 0.012926863      | -2.057187222 |
| CDV3      | 0.15268911      | 7.585817109        | 3.248776746  | 0.001720414 | 0.013256425      | -2.061389808 |
| GEN1      | 0.263245549     | 2.182790133        | 3.114298381  | 0.002591287 | 0.018614758      | -2.061784511 |
| ABCE1     | 0.12736678      | 6.066220783        | 3.254096379  | 0.001692386 | 0.013087319      | -2.061998074 |
| NR6A1     | -0.726277727    | -1.266589628       | -2.930228276 | 0.004458316 | 0.028781943      | -2.063658123 |
| GOSR2     | 0.116729391     | 3.680019556        | 3.192045101  | 0.002047637 | 0.01529281       | -2.064241543 |
| CACNB3    | -0.126472311    | 4.381478004        | -3.222733306 | 0.001864022 | 0.014217535      | -2.0727085   |
| ECD       | 0.094886102     | 5.055734617        | 3.235516397  | 0.001792186 | 0.013725207      | -2.073196424 |
| CNNM1     | -0.40248428     | 0.521606131        | -3.014611204 | 0.003485628 | 0.023684031      | -2.074549678 |
| SLC35G1   | 0.173670327     | 2.709594572        | 3.134293066  | 0.00243988  | 0.017772894      | -2.075607157 |
| ZER1      | -0.096521191    | 6.244237907        | -3.252244122 | 0.001702096 | 0.013148908      | -2.076851348 |
| KIAA1522  | -0.197058505    | 4.884438094        | -3.225646323 | 0.001847419 | 0.01411949       | -2.079843093 |
| MEG9      | 0.790194032     | -1.472444278       | 2.92787431   | 0.004488742 | 0.02890911       | -2.082466859 |
| TMCC3     | -0.601417764    | -0.551564232       | -2.945812175 | 0.004261647 | 0.027791105      | -2.083934004 |
| CCl8      | -0.974796744    | -2.879350242       | -2.915823258 | 0.004647532 | 0.029640314      | -2.084702147 |
| SH3YL1    | 0.137927047     | 3.775898675        | 3.190910773  | 0.002054737 | 0.015338238      | -2.088543077 |
| ELK4      | 0.185316929     | 5.430342609        | 3.239972535  | 0.001767759 | 0.013565729      | -2.088553486 |
| RNF152    | -0.305606847    | 2.941534833        | -3.157858129 | 0.002272042 | 0.016752835      | -2.089882617 |
| SERTAD4   | -0.535355008    | 2.177609479        | -3.081150092 | 0.002861733 | 0.020286658      | -2.091645461 |
| GFOD1     | 0.370980538     | 0.851941371        | 3.021596396  | 0.003414645 | 0.023317413      | -2.091926213 |
| NUP43     | -0.146598952    | 4.046709524        | -3.200099557 | 0.001998422 | 0.015017107      | -2.095218387 |
| SIPA1     | -0.171832323    | 4.279772236        | -3.210497432 | 0.001935302 | 0.014642589      | -2.096493151 |
| PDK4      | -0.812635892    | -1.409490528       | -2.918658798 | 0.00460971  | 0.029448969      | -2.097982274 |
| TMEM178A  | 1.071705902     | -3.659262025       | 2.918336689  | 0.004613992 | 0.02946383       | -2.098814829 |
| FN3K      | -0.289710575    | 3.906090008        | -3.19823627  | 0.002009283 | 0.015081136      | -2.101154167 |
| TUBD1     | -0.288786614    | 1.101703372        | -3.020943388 | 0.003421223 | 0.023351749      | -2.102229076 |
| TAPT1-AS1 | -0.385530256    | -0.868296388       | -2.959518506 | 0.004095335 | 0.026986934      | -2.103406284 |
| HDX       | -0.264648269    | 1.968873064        | -3.076481877 | 0.002901865 | 0.020522859      | -2.104133788 |
| TBC1D30   | -0.432956505    | -1.063860166       | -2.941274851 | 0.004318064 | 0.02806183       | -2.106140177 |
| TSC1      | -0.166315453    | 5.003091299        | -3.217742082 | 0.001892797 | 0.014378763      | -2.108741572 |
| ZNF652    | 0.165386646     | 4.450076125        | 3.207527707  | 0.001952983 | 0.014754132      | -2.10887294  |
| UBAP2     | -0.122813709    | 4.824195194        | -3.215959481 | 0.001903174 | 0.014443026      | -2.110997063 |
| KCND1     | -0.260859492    | 2.400928375        | -3.099234992 | 0.002711089 | 0.019327895      | -2.113530536 |
| EOGT      | 0.236563294     | 4.095278724        | 3.190135417  | 0.002059604 | 0.015359346      | -2.113698734 |
| C11orf24  | 0.128031222     | 6.570157512        | 3.238536013  | 0.001775599 | 0.0136051        | -2.116541327 |
| PPA2      | 0.115897328     | 4.914961425        | 3.218055981  | 0.001890975 | 0.014372171      | -2.118564535 |
| ZNF263    | 0.141918793     | 4.67763459         | 3.211379298  | 0.001930081 | 0.014617767      | -2.120250263 |
| CDC20     | -0.341597685    | 2.904816015        | -3.135653103 | 0.002429887 | 0.017717237      | -2.120259107 |
| EIF3J     | 0.134913284     | 5.716116512        | 3.230948404  | 0.001817553 | 0.013912407      | -2.12172452  |
| AMER1     | 0.393250162     | 3.437917893        | 3.144880577  | 0.002363089 | 0.017288771      | -2.123774371 |
| CACFD1    | -0.158846621    | 4.177251233        | -3.202789774 | 0.001981505 | 0.014924694      | -2.124776508 |
| RNF8      | -0.128117819    | 4.228875717        | -3.186820939 | 0.002080531 | 0.015484743      | -2.130510418 |
| INO80     | 0.142882361     | 4.829969558        | 3.214078151  | 0.001914183 | 0.014511955      | -2.131766112 |
| IFT80     | 0.153490158     | 4.673391737        | 3.20203671   | 0.001986074 | 0.014951633      | -2.138294069 |
| IVD       | -0.08110705     | 5.529264325        | -3.223140116 | 0.001861695 | 0.014206979      | -2.141279245 |
| SRP9      | 0.112108101     | 5.883623486        | 3.226416946  | 0.00184305  | 0.014093248      | -2.143677943 |
| CDC6      | 0.278614273     | 2.79318541         | 3.118847619  | 0.002556088 | 0.018423401      | -2.144018366 |
| ZNF451    | -0.179161181    | 4.417657652        | -3.196254844 | 0.002021484 | 0.015157608      | -2.144175602 |
| FAM204A   | 0.141636451     | 5.137774254        | 3.214529277  | 0.001911538 | 0.014499196      | -2.146215492 |
| CCDC77    | -0.176343533    | 2.407474073        | -3.096824748 | 0.00273073  | 0.019436961      | -2.148483338 |
| MCUR1     | 0.100872137     | 5.010869439        | 3.211052294  | 0.001932016 | 0.014625066      | -2.148961386 |
| BRF2      | 0.162518764     | 2.232055947        | 3.070200962  | 0.002956687 | 0.020832334      | -2.155441858 |
| STK38L    | 0.265609646     | 4.421934173        | 3.189119048  | 0.002066    | 0.015399421      | -2.156152747 |
| STAC3     | 0.501187296     | -1.276610557       | 2.900965568  | 0.004850438 | 0.030610387      | -2.161603846 |
| CD72      | -0.305027387    | -0.188798677       | -2.947979158 | 0.004234944 | 0.027649763      | -2.167230164 |
| SKA1      | -0.391599812    | 0.599134303        | -2.978787407 | 0.003871667 | 0.025795134      | -2.167576249 |
| BEST1     | -0.161990075    | 3.149696595        | -3.13613883  | 0.002426327 | 0.01769985       | -2.169075453 |
| RABL2B    | 0.123167427     | 3.25235256         | 3.137534743  | 0.002416124 | 0.017642508      | -2.171686964 |
| ZNF354C   | -0.290985476    | 2.858823485        | -3.098598434 | 0.002716263 | 0.019348508      | -2.176011739 |
| PMPCA     | 0.137804127     | 5.664559062        | 3.209958219  | 0.001938502 | 0.014656069      | -2.177473466 |
| MIR3189   | 0.975331533     | -3.122669002       | 2.873142872  | 0.005252533 | 0.03250787       | -2.182386525 |
| TMEM2     | 0.396299525     | 4.291694662        | 3.193263741  | 0.002040034 | 0.015251149      | -2.185856622 |
| NHLRC1    | -0.320506315    | 0.436590327        | -2.951663042 | 0.004189903 | 0.027418204      | -2.186180891 |
| DIS3      | 0.176048472     | 5.900230872        | 3.211863804  | 0.001927218 | 0.014603425      | -2.18661694  |
| HLF       | 0.902070755     | -3.244457333       | 2.871618767  | 0.005275422 | 0.032619093      | -2.187888789 |
| ZNF596    | -0.296286285    | 1.220380087        | -2.997785906 | 0.003662262 | 0.024629337      | -2.188289074 |
| CCNC      | 0.098998835     | 5.387026386        | 3.203881137  | 0.001974901 | 0.014912232      | -2.188822866 |
| PIGO      | -0.199514547    | 3.813312998        | -3.159728409 | 0.002259194 | 0.016682598      | -2.190653761 |
| PLPP6     | -0.243059292    | 2.170068694        | -3.064514508 | 0.00300715  | 0.021128593      | -2.196806733 |
| VRK2      | -0.159731376    | 3.350487811        | -3.135492772 | 0.002431063 | 0.017717237      | -2.203678122 |

| Gene           | Log fold change | Average Expression | t            | P-value     | Adjusted P-value | B            |
|----------------|-----------------|--------------------|--------------|-------------|------------------|--------------|
| SAR1B          | 0.094047761     | 5.509004466        | 3.199954514  | 0.001998759 | 0.015017107      | -2.20606171  |
| DUSP8          | -0.686000647    | -1.592211541       | -2.907166743 | 0.004764777 | 0.030216526      | -2.210115807 |
| SMG8           | -0.222591338    | 4.132520184        | -3.157908612 | 0.002271694 | 0.016752835      | -2.213627201 |
| SBF1           | -0.095314046    | 7.177782754        | -3.200930208 | 0.001992805 | 0.014987328      | -2.215646223 |
| SGTB           | 0.163713243     | 4.091010876        | 3.156723074  | 0.002279873 | 0.016802349      | -2.217148674 |
| XPC            | -0.1777481      | 5.48816694         | -3.193289043 | 0.002039876 | 0.015251149      | -2.223724048 |
| C12orf4        | -0.162092833    | 4.435305785        | -3.173256528 | 0.002168263 | 0.016082084      | -2.223900773 |
| CEP126         | -0.16634703     | 2.788414855        | -3.104450256 | 0.002669039 | 0.019073245      | -2.224863723 |
| ABTB1          | -0.162568248    | 3.606540367        | -3.146621119 | 0.002350683 | 0.017223101      | -2.226267698 |
| POLR3H         | 0.087642399     | 5.952206543        | 3.196733352  | 0.002018531 | 0.015143005      | -2.226306292 |
| SLC10A5        | -0.794215369    | -2.295885368       | -2.85880024  | 0.005471601 | 0.033587695      | -2.229019544 |
| MRPL35         | -0.087101123    | 4.415729828        | -3.164817273 | 0.002224578 | 0.016443106      | -2.230361025 |
| JAG2           | 0.470953164     | -0.620305338       | 2.899693578  | 0.004868183 | 0.030683812      | -2.232932256 |
| ATL3           | 0.149387101     | 7.083673224        | 3.194459502  | 0.002032599 | 0.015218226      | -2.234909667 |
| RAN            | 0.093009563     | 7.307547618        | 3.193715033  | 0.002037225 | 0.015245282      | -2.236983277 |
| ZNF610         | 0.326934526     | 1.317509166        | 2.95309104   | 0.004172564 | 0.027351342      | -2.239701004 |
| TTC21B         | -0.196728025    | 3.481715482        | -3.118233147 | 0.002560816 | 0.018448653      | -2.251862609 |
| ZNF845         | 0.263933334     | 2.418996062        | 3.044753558  | 0.003188808 | 0.022177381      | -2.252395796 |
| PRDX3          | 0.074995172     | 6.452079505        | 3.19051275   | 0.002057234 | 0.015349272      | -2.253077515 |
| ZNF697         | 0.347391001     | 3.847131254        | 3.138210717  | 0.002411198 | 0.017615075      | -2.255805028 |
| PREB           | -0.15141721     | 5.664098689        | -3.183587615 | 0.002101137 | 0.015630384      | -2.255850905 |
| ANKHD1         | 0.070677157     | -0.772401266       | 2.873859656  | 0.0052418   | 0.032468121      | -2.257154969 |
| HNRNPUL2-BSCL2 | 0.540795576     | -2.029109338       | 2.844538132  | 0.00569775  | 0.034539598      | -2.257803402 |
| FANCG          | -0.152150477    | 3.719013258        | -3.133514204 | 0.00244562  | 0.017797494      | -2.257948746 |
| EFCAB12        | -0.657819442    | -2.412758245       | -2.840883643 | 0.005757065 | 0.034857084      | -2.266554751 |
| SENP8          | -0.212851139    | 1.293093875        | -2.972541788 | 0.003942895 | 0.026188609      | -2.268413258 |
| HNRNPD         | 0.128401566     | 7.421413339        | 3.180777213  | 0.002119203 | 0.015733695      | -2.270217526 |
| SMN1           | 0.244021852     | 1.207419351        | 2.979239964  | 0.003866553 | 0.025772457      | -2.270714383 |
| TNFAIP8L1      | -0.261731175    | 1.544075416        | -2.984660859 | 0.003805774 | 0.025468758      | -2.270970275 |
| PLCL2          | -0.250194381    | 3.926483013        | -3.127345668 | 0.002491527 | 0.018009769      | -2.271476768 |
| EID3           | -0.30671768     | 0.912316852        | -2.971353641 | 0.003956581 | 0.026231362      | -2.271491062 |
| TMEM69         | 0.141442257     | 4.007495556        | 3.131889753  | 0.002457632 | 0.017842154      | -2.279036445 |
| SEMA6D         | -0.491897144    | 1.263120866        | -2.936479325 | 0.004378442 | 0.028368536      | -2.279062762 |
| LZTS1          | 0.389113042     | 0.942703646        | 2.968477258  | 0.003989898 | 0.026384467      | -2.280082826 |
| SNX5           | 0.111889991     | 6.07940959         | 3.17840752   | 0.002134548 | 0.015839817      | -2.28408754  |
| ZNRF2          | 0.195960394     | 2.612814509        | 3.063792114  | 0.003013617 | 0.02115298       | -2.284466697 |
| RNF39          | 0.348277011     | 0.141430056        | 2.904684234  | 0.0047989   | 0.030363913      | -2.287374745 |
| RAD17          | -0.128313449    | 3.886079112        | -3.120263398 | 0.002545225 | 0.018362675      | -2.292935248 |
| INPP1          | 0.113789398     | 4.694934988        | 3.149502699  | 0.002330278 | 0.017098544      | -2.293282897 |
| THAP8          | -0.243459826    | 3.635757337        | -3.109136004 | 0.002631777 | 0.018849827      | -2.297978683 |
| PRNP           | 0.084995969     | 8.654079724        | 3.150906891  | 0.002320395 | 0.017042626      | -2.299572508 |
| ESCO1          | 0.330157043     | 3.539905333        | 3.100986614  | 0.002696897 | 0.019244937      | -2.300784315 |
| EXOC3          | -0.10814162     | 5.94568179         | -3.169385315 | 0.002193928 | 0.016256436      | -2.307946281 |
| TRIP11         | -0.19870202     | 5.335222324        | -3.158894006 | 0.002264918 | 0.016716668      | -2.309127384 |
| ZNF514         | -0.245998567    | 1.818517575        | -2.979615379 | 0.003862315 | 0.025764591      | -2.31250215  |
| BEND3          | 0.317305593     | 2.673363191        | 3.036566673  | 0.003267014 | 0.022513406      | -2.31267001  |
| PLEKHG5        | -0.234289303    | 1.89089943         | -3.033683615 | 0.003294977 | 0.022664626      | -2.313186228 |
| SRPK1          | -0.179710099    | 4.835346578        | -3.146164413 | 0.002353933 | 0.017230148      | -2.314241243 |
| DCAF4          | 0.23561734      | 4.122673375        | 3.110755487  | 0.002619012 | 0.018787046      | -2.317057002 |
| PLA2G12A       | 0.114353075     | 4.37768627         | 3.133538785  | 0.002445438 | 0.017797494      | -2.319928362 |
| SERBP1         | 0.067086606     | 7.579911186        | 3.160480506  | 0.002254047 | 0.016652751      | -2.321656591 |
| CFAP157        | -0.43459513     | -0.480004425       | -2.855389168 | 0.005524925 | 0.033825706      | -2.327840058 |
| LOC103344931   | -0.232691636    | 1.718752912        | -3.006694341 | 0.003567732 | 0.02418736       | -2.332420101 |
| FXYP6          | -0.776686626    | -2.141923364       | -2.809308682 | 0.00629369  | 0.03742919       | -2.340422091 |
| EDARADD        | -1.023611832    | -3.518030199       | -2.811807616 | 0.006249603 | 0.03719637       | -2.341382304 |
| HDAC6          | -0.091723515    | 4.479172687        | -3.130466196 | 0.002468204 | 0.017884089      | -2.342019788 |
| PHLDA2         | 0.284901795     | 3.083436193        | 3.062722776  | 0.003023215 | 0.021182193      | -2.343860218 |
| IRAK2          | 0.411314126     | 1.014013685        | 2.906598866  | 0.004772563 | 0.03024564       | -2.347757103 |
| NRIP3          | 0.232833719     | 1.931992944        | 2.987597551  | 0.003773218 | 0.025307105      | -2.347929235 |
| ASB14          | 0.485024074     | -1.676332365       | 2.813108435  | 0.006226766 | 0.037104843      | -2.350105939 |
| ROCK1P1        | -1.045334346    | -4.480186124       | -2.813166229 | 0.006225753 | 0.037104843      | -2.351460065 |
| ZIC4           | -0.23043559     | 2.035615364        | -3.015157661 | 0.003480026 | 0.023656637      | -2.35161283  |
| POLL           | -0.160564669    | 4.282545823        | -3.119768323 | 0.002549019 | 0.018381242      | -2.356489733 |
| ST3GAL4        | -0.169238878    | 4.456448977        | -3.121107992 | 0.002538765 | 0.018324846      | -2.359185781 |
| CEP131         | -0.240310007    | 3.092239795        | -3.072674138 | 0.002934986 | 0.020708491      | -2.360091488 |
| TUBGCP4        | -0.150367329    | 3.635620817        | -3.091066864 | 0.002778189 | 0.019750187      | -2.360990495 |
| UBE2B          | 0.105086099     | 6.000244127        | 3.150324474  | 0.002324489 | 0.01706438       | -2.361672193 |
| EHD1           | 0.152203735     | 7.202123632        | 3.146424962  | 0.002352079 | 0.017224945      | -2.368481044 |
| MERTK          | -0.58350719     | -1.703056415       | -2.802450142 | 0.006416161 | 0.037969918      | -2.372075732 |
| ANKRD13C       | 0.146277279     | 5.02597667         | 3.131283634  | 0.002462128 | 0.017857244      | -2.373807284 |

| Gene      | Log fold change | Average Expression | t            | P-value     | Adjusted P-value | B            |
|-----------|-----------------|--------------------|--------------|-------------|------------------|--------------|
| GCLM      | 0.239381048     | 5.13316337         | 3.129458318  | 0.002475714 | 0.017929885      | -2.374606936 |
| CIART     | -0.254278189    | 2.017818515        | -3.017742187 | 0.003453643 | 0.023509121      | -2.380221408 |
| SOCS6     | -0.179604879    | 4.845977168        | -3.124187863 | 0.002515337 | 0.018164451      | -2.383254109 |
| RRP1      | 0.212361647     | 5.263785488        | 3.129031075  | 0.002478905 | 0.017944362      | -2.383857314 |
| KPRP      | -0.780599656    | -4.821971802       | -2.79628221  | 0.006528163 | 0.038459226      | -2.386049811 |
| KLF12     | -0.215028975    | 4.517058216        | -3.113111273 | 0.002600546 | 0.018672367      | -2.387396274 |
| TP53BP2   | 0.169647236     | 4.943234056        | 3.128021443  | 0.002486459 | 0.0179904        | -2.388405416 |
| MLLT1     | -0.098582516    | 7.038455564        | -3.139855198 | 0.002399252 | 0.017536311      | -2.389866237 |
| STAMBPL1  | -0.282359877    | 2.64026295         | -3.038710216 | 0.003246368 | 0.02240187       | -2.390054727 |
| LCA5      | -0.328855231    | 1.982248428        | -2.943916951 | 0.004285129 | 0.027895931      | -2.401256356 |
| LINC00954 | -0.674573356    | -2.697904756       | -2.775897843 | 0.006911192 | 0.040150479      | -2.402304822 |
| B3GALT5   | -0.451948686    | -0.602422926       | -2.826996535 | 0.005987677 | 0.036021713      | -2.402473306 |
| UBR2      | -0.197841176    | 4.923758912        | -3.110270196 | 0.002622831 | 0.018805487      | -2.406660933 |
| AREG      | 0.910621566     | -4.083079132       | 2.772924612  | 0.006968749 | 0.040406941      | -2.409176545 |
| SNRPD1    | 0.157141735     | 4.761143201        | 3.106192765  | 0.002655125 | 0.018991835      | -2.410969074 |
| ARHGEF10L | -0.1190241      | 5.046495641        | -3.115681414 | 0.002580538 | 0.018546389      | -2.415563512 |
| HMGCS1    | 0.329359451     | 6.92190708         | 3.132656979  | 0.002451952 | 0.017826898      | -2.415715578 |
| KIAA0895L | -0.256380855    | 1.504112755        | -2.949077813 | 0.004221465 | 0.027588784      | -2.416728431 |
| TMEM8B    | -0.133139475    | 5.069469765        | -3.117296829 | 0.002568037 | 0.018476447      | -2.417313474 |
| RSL24D1   | 0.174286965     | 6.552135691        | 3.131426845  | 0.002461065 | 0.017857244      | -2.419201607 |
| CTBP1-AS  | 0.641514438     | -1.934828657       | 2.776151115  | 0.006906309 | 0.040137591      | -2.420383023 |
| ITGAE     | 0.160781601     | 3.257028763        | 3.046967126  | 0.003167964 | 0.02206297       | -2.42263734  |
| SNX1      | 0.071475794     | 6.874640842        | 3.127601594  | 0.002489606 | 0.018004526      | -2.427890856 |
| TTC32     | 0.37013925      | -0.06282962        | 2.858370907  | 0.005478287 | 0.033601349      | -2.429474605 |
| TCHH      | 0.560076727     | -1.869780875       | 2.771076986  | 0.007004737 | 0.040553173      | -2.431632861 |
| ZNF699    | -0.678720694    | 0.268301297        | -2.851202018 | 0.005591034 | 0.034084719      | -2.432662689 |
| WNK4      | -0.415447653    | -0.015830884       | -2.847009495 | 0.005657957 | 0.034381387      | -2.435511578 |
| NEXN      | 0.211468879     | 5.229750969        | 3.112213479  | 0.002607569 | 0.018713874      | -2.436445147 |
| ZNF607    | 0.380369698     | 1.684454597        | 2.895219138  | 0.004931083 | 0.030976576      | -2.436881053 |
| RPH3AL    | -0.374570653    | -0.373386535       | -2.838780967 | 0.00579145  | 0.035023042      | -2.437403788 |
| TOX2      | -0.315357855    | 2.58800201         | -3.017986897 | 0.003451155 | 0.023502803      | -2.439777219 |
| KIF13B    | -0.319360395    | 3.00349293         | -3.035323361 | 0.003279046 | 0.022566216      | -2.443776436 |
| DERL2     | 0.117506091     | 5.109606022        | 3.107681837  | 0.002643289 | 0.018916152      | -2.446222072 |
| NUDC2     | 0.131955721     | 4.437031587        | 3.088945313  | 0.002795869 | 0.01985713       | -2.4464401   |
| KIAA1755  | -0.228690643    | 3.345570912        | -3.039955575 | 0.003234428 | 0.022380586      | -2.447806404 |
| CRIP1     | 0.124347325     | 4.184897106        | 3.077316278  | 0.002894653 | 0.020481473      | -2.448864697 |
| MAP4K2    | -0.141156886    | 2.754065847        | -3.020588167 | 0.003424807 | 0.023365622      | -2.449728253 |
| ARHGEF18  | -0.232791473    | 1.659689492        | -2.92321158  | 0.004549576 | 0.029163751      | -2.452050359 |
| IFI16     | 0.113409002     | 8.343996348        | 3.098563333  | 0.002716549 | 0.019348508      | -2.45246638  |
| ATP13A1   | -0.105804995    | 6.022900255        | -3.117461594 | 0.002566765 | 0.018476447      | -2.452759114 |
| NAP1L4    | 0.092547522     | 5.929555609        | 3.117255748  | 0.002568354 | 0.018476447      | -2.45332064  |
| DUS2      | -0.163306468    | 2.788009318        | -2.994982045 | 0.003692492 | 0.024820132      | -2.455057535 |
| PAK1      | -0.11281409     | 5.015145655        | -3.102291962 | 0.002686367 | 0.019178875      | -2.455111037 |
| LARS2     | -0.131093966    | 4.479352264        | -3.084326737 | 0.00283472  | 0.020104627      | -2.456136919 |
| FANCM     | -0.294823812    | 1.108440442        | -2.89241174  | 0.004970929 | 0.031123059      | -2.457785718 |
| LYSMD1    | 0.226320738     | 1.952687192        | 2.923539335  | 0.004545275 | 0.029160999      | -2.45889386  |
| HSDL1     | -0.141992715    | 4.146225073        | -3.071530377 | 0.002945003 | 0.020759724      | -2.46136846  |
| ZNF169    | -0.372846184    | -0.522529495       | -2.787626788 | 0.006688359 | 0.039234206      | -2.465437655 |
| SNAPC1    | 0.141484812     | 3.179940536        | 3.041534521  | 0.003219349 | 0.022307391      | -2.466312782 |
| ZNF788    | -0.275309066    | 2.215460572        | -2.93243849  | 0.004429922 | 0.028652789      | -2.466448861 |
| BRD3      | -0.232133377    | 5.062141509        | -3.089391455 | 0.002792143 | 0.019840017      | -2.467804089 |
| LMNB1     | -0.295160745    | 3.308811724        | -3.019993011 | 0.003430819 | 0.023396041      | -2.468353839 |
| MAPK6     | 0.288232382     | 5.687698886        | 3.109010439  | 0.002632769 | 0.018849827      | -2.469442325 |
| CCDC89    | -0.295196881    | 0.54601349         | -2.857064415 | 0.005498677 | 0.033698973      | -2.47209026  |
| ATP7B     | -0.300425437    | 0.860369576        | -2.887240015 | 0.005045112 | 0.031430757      | -2.472588285 |
| SEPSECS   | -0.263231528    | 1.835738016        | -2.918033391 | 0.004618027 | 0.029477103      | -2.475151133 |
| TRIP4     | 0.091841839     | 4.10445108         | 3.06764185   | 0.002979299 | 0.020972035      | -2.476688435 |
| TTC14     | 0.205943656     | 3.373045466        | 3.039584062  | 0.003237985 | 0.022385045      | -2.479249721 |
| PTGES3    | 0.076206611     | 7.489607452        | 3.104122867  | 0.00267166  | 0.019082927      | -2.479559252 |
| ZNF74     | 0.15670504      | 3.197678473        | 3.004794039  | 0.003587705 | 0.02428997       | -2.480120494 |
| TAB2      | -0.125248099    | 6.313193869        | -3.109359412 | 0.002630013 | 0.018848008      | -2.480768784 |
| CBR4      | -0.17984337     | 2.93004788         | -3.009786113 | 0.003535457 | 0.023979342      | -2.483279488 |
| FBXO2     | 0.487566001     | -0.803420277       | 2.789311693  | 0.006656895 | 0.039080071      | -2.483296995 |
| C2orf68   | -0.18093249     | 3.495585369        | -3.039020311 | 0.003243391 | 0.02240187       | -2.483762079 |
| ATG12     | 0.094841949     | 5.833501327        | 3.105138344  | 0.002663536 | 0.019042958      | -2.484098365 |
| ZNF608    | -0.434848169    | 3.351491789        | -3.040555998 | 0.003228686 | 0.022353052      | -2.486140246 |
| C8orf48   | -0.278098496    | 0.971417895        | -2.83730456  | 0.005815706 | 0.035141513      | -2.487214116 |
| ZSWIM3    | 0.255033132     | 1.786618609        | 2.903685563  | 0.004812691 | 0.030410394      | -2.487291448 |
| SLC2A12   | -0.303790968    | 1.320420976        | -2.915555367 | 0.00465112  | 0.029650644      | -2.488103566 |
| ZNF44     | 0.203029413     | 1.875556354        | 2.917264026  | 0.004628278 | 0.029530024      | -2.494831103 |



| Gene      | Log fold change | Average Expression | t            | P-value     | Adjusted P-value | B            |
|-----------|-----------------|--------------------|--------------|-------------|------------------|--------------|
| ENC1      | 0.244712973     | 3.426775941        | 3.036274842  | 0.003269835 | 0.022522539      | -2.497779247 |
| ADPRH     | -0.239937111    | 1.874756938        | -2.940340182 | 0.004329771 | 0.028113654      | -2.498049087 |
| ELP3      | -0.094649068    | 4.924137175        | -3.079782194 | 0.002873439 | 0.020350485      | -2.49900354  |
| RABGGTA   | -0.179526885    | 4.057980442        | -3.064544887 | 0.003006878 | 0.021128593      | -2.501083199 |
| CCNY      | 0.07133697      | 6.918240905        | 3.100642072  | 0.002699683 | 0.019255696      | -2.502905499 |
| MUM1L1    | -0.69888348     | -5.016819543       | -2.748427236 | 0.007459949 | 0.042374313      | -2.504916804 |
| TAF13     | 0.201309115     | 4.724611693        | 3.077382363  | 0.002894083 | 0.020481473      | -2.506829376 |
| CHRAC1    | 0.099986264     | 5.128420331        | 3.080898142  | 0.002863886 | 0.020292369      | -2.518340084 |
| CACNA1A   | -0.185072702    | 3.584085308        | -3.030934873 | 0.003321843 | 0.022797379      | -2.5195457   |
| POLQ      | -0.427699706    | 0.242942844        | -2.820530994 | 0.006097915 | 0.036538977      | -2.522683837 |
| CNEP1R1   | 0.157047999     | 3.110508026        | 3.003933058  | 0.003596788 | 0.024340528      | -2.524061722 |
| AP3S1     | 0.108005905     | 6.850887257        | 3.091104316  | 0.002777878 | 0.019750187      | -2.530162519 |
| NAP1L1    | 0.083881911     | 9.258497315        | 3.052377398  | 0.003117548 | 0.021752082      | -2.53474302  |
| LYST      | -0.316198584    | 3.985456496        | -3.022901244 | 0.003401535 | 0.023248966      | -2.536680137 |
| CEP83     | -0.211080388    | 2.592401383        | -2.956476339 | 0.004131722 | 0.027179151      | -2.541990651 |
| TBXA2R    | -0.246895589    | 1.533097118        | -2.904547128 | 0.004800792 | 0.030363913      | -2.542404234 |
| KIAA0586  | -0.196049342    | 3.899922135        | -3.033162861 | 0.003300051 | 0.022678819      | -2.543321549 |
| TOMM40    | 0.200696822     | 4.541808384        | 3.053825213  | 0.003104184 | 0.021678917      | -2.544181762 |
| CCDC112   | -0.213189399    | 2.439224781        | -2.949923963 | 0.004211111 | 0.02753306       | -2.5447484   |
| CLCN7     | -0.131694101    | 6.699298792        | -3.085943131 | 0.002821066 | 0.020026647      | -2.544843728 |
| APBB3     | -0.257196184    | 1.370308825        | -2.907778748 | 0.004756399 | 0.030194013      | -2.547075128 |
| TGFB11    | -0.14911862     | 6.378691202        | -3.085150082 | 0.002827758 | 0.020064693      | -2.547781067 |
| NARF      | -0.145211759    | 4.760776728        | -3.067210723 | 0.002983124 | 0.020989153      | -2.548319719 |
| WDR62     | -0.306815795    | 1.318727238        | -2.868980627 | 0.00531526  | 0.032815195      | -2.550089376 |
| KDM4C     | -0.166715485    | 2.243529528        | -2.953440361 | 0.004168332 | 0.027336419      | -2.555910825 |
| TMCC1-AS1 | -0.359176396    | 0.165227197        | -2.802382464 | 0.00641738  | 0.037969918      | -2.557703907 |
| RFLNB     | 0.140245703     | 5.864686639        | 3.074753431  | 0.002916856 | 0.020609531      | -2.561658685 |
| PSME4     | 0.27601698      | 5.892497415        | 3.07194816   | 0.002941341 | 0.020743612      | -2.569027195 |
| EMP1      | 0.195577347     | 9.382988105        | 3.041854619  | 0.0032163   | 0.022307391      | -2.570020169 |
| MLF1      | 0.152645938     | 2.878306687        | 2.971833062  | 0.003951053 | 0.026208132      | -2.57195891  |
| UBE2E1    | 0.150201701     | 6.215892852        | 3.074468332  | 0.002919336 | 0.020617381      | -2.576454642 |
| RABGAP1L  | 0.090954607     | 4.500055607        | 3.042110396  | 0.003213865 | 0.022307391      | -2.577028964 |
| SKIDA1    | 0.295001478     | 0.899748966        | 2.817027954  | 0.006158417 | 0.036828263      | -2.577597524 |
| LONRF2    | -0.555265409    | -1.353564573       | -2.713529583 | 0.00821446  | 0.045898601      | -2.577922557 |
| ZNF551    | -0.194353877    | 2.388069497        | -2.940778294 | 0.00432428  | 0.028090107      | -2.581068293 |
| TAF4      | -0.174790427    | 3.287278591        | -2.972910609 | 0.003938655 | 0.026172855      | -2.581598887 |
| TNK2      | -0.152372907    | 4.640871916        | -3.045807133 | 0.003178871 | 0.022128704      | -2.586663757 |
| LCMT2     | -0.127529248    | 3.48520111         | -3.000656461 | 0.003631551 | 0.024510349      | -2.588827423 |
| H2AFV     | 0.138866862     | 6.310524485        | 3.069312329  | 0.00296452  | 0.020877763      | -2.590044717 |
| XYLT2     | -0.157035449    | 4.736358876        | -3.040532973 | 0.003228906 | 0.022353052      | -2.591616572 |
| MICALCL   | -0.633100673    | -2.512294911       | -2.693985825 | 0.008666816 | 0.047823047      | -2.593258598 |
| CPSF6     | 0.08244835      | 5.621213729        | 3.061518136  | 0.003034061 | 0.02123843       | -2.596930963 |
| MTA1      | -0.115975554    | 5.811480681        | -3.063958935 | 0.003012123 | 0.02115298       | -2.599347962 |
| FBXL12    | 0.155527151     | 4.266317478        | 3.025265457  | 0.0033779   | 0.023129403      | -2.59965798  |
| NOL8      | -0.126010582    | 5.280525483        | -3.051960568 | 0.003121406 | 0.021768914      | -2.599989964 |
| YPEL5     | 0.071368369     | 6.658527068        | 3.065498668  | 0.002998359 | 0.021086499      | -2.601451124 |
| ARPP19    | 0.127211132     | 6.069482637        | 3.06323268   | 0.003018635 | 0.021163077      | -2.602890348 |
| UBE2A     | 0.078727696     | 6.269728053        | 3.063656489  | 0.003014833 | 0.02115298       | -2.604721481 |
| EP400     | -0.229729975    | 5.858011994        | -3.060728769 | 0.003041188 | 0.021268551      | -2.605673651 |
| SDHAF2    | 0.212432335     | 2.77992596         | 2.956108457  | 0.004136142 | 0.027194418      | -2.60651942  |
| HELZ      | -0.244622427    | 4.877334989        | -3.039806527 | 0.003235855 | 0.022380586      | -2.606609191 |
| NAPEPLD   | -0.212612865    | 3.585139887        | -2.984127718 | 0.003811712 | 0.025497169      | -2.607236341 |
| IMPA2     | -0.199571476    | 3.162220125        | -2.986598844 | 0.00378426  | 0.02534731       | -2.609370117 |
| PTGR2     | 0.184426094     | 1.511700204        | 2.867858491  | 0.005332289 | 0.032879901      | -2.610164902 |
| PIP4K2B   | -0.139562873    | 6.795557422        | -3.061875848 | 0.003030837 | 0.021225722      | -2.611154455 |
| DYNLT3    | 0.095693674     | 5.145471149        | 3.044804506  | 0.003188327 | 0.022177381      | -2.617269406 |
| TRAF7     | -0.090509383    | 7.24958236         | -3.055260871 | 0.003090984 | 0.021596747      | -2.619880237 |
| CNPPD1    | -0.134536064    | 5.611593759        | -3.051302468 | 0.003127505 | 0.021801359      | -2.624269683 |
| KYAT3     | 0.160108904     | 5.06290442         | 3.036764372  | 0.003265105 | 0.022512904      | -2.626656312 |
| TRIM33    | 0.324107565     | 4.628776701        | 3.022157073  | 0.003409006 | 0.023289463      | -2.628165807 |
| HINT3     | -0.145111994    | 4.153468796        | -3.019175395 | 0.003439094 | 0.023441858      | -2.628922146 |
| ZNF92     | -0.183333361    | 2.660009373        | -2.927511797 | 0.004493445 | 0.028914673      | -2.629663727 |
| PFKM      | 0.090216669     | 5.982296008        | 3.05295139   | 0.003112243 | 0.021725132      | -2.630939957 |
| NUS1      | 0.160924371     | 4.200855689        | 3.010233945  | 0.003530804 | 0.023958574      | -2.630994536 |
| GGCT      | 0.208769247     | 3.897789744        | 2.99922175   | 0.003646871 | 0.024558096      | -2.631782842 |
| IL19      | 0.925301405     | -4.297540065       | 2.675561158  | 0.009113939 | 0.04957669       | -2.635562973 |
| RF2       | 0.105518845     | 5.311659101        | 3.036728949  | 0.003265447 | 0.022512904      | -2.647515309 |
| MFSD11    | 0.127774064     | 3.819250642        | 2.98690257   | 0.003780899 | 0.025336061      | -2.647519959 |
| TBKBP1    | -0.143876213    | 4.161902502        | -2.999460851 | 0.003644314 | 0.024558096      | -2.651550252 |
| SWAP70    | 0.225250948     | 7.131390782        | 3.04204194   | 0.003214517 | 0.022307391      | -2.652597075 |

| Gene         | Log fold change | Average Expression | t            | P-value     | Adjusted P-value | B            |
|--------------|-----------------|--------------------|--------------|-------------|------------------|--------------|
| DET1         | -0.138507666    | 2.602152071        | -2.923212276 | 0.004549567 | 0.029163751      | -2.655851485 |
| RAF1         | 0.097147704     | 6.259120627        | 3.042212152  | 0.003212897 | 0.022307391      | -2.664576299 |
| RBM45        | 0.145556865     | 2.892165106        | 2.936324605  | 0.004380403 | 0.028369039      | -2.665402248 |
| UBA7         | -0.116470809    | 5.796802263        | -3.038857045 | 0.003244958 | 0.02240187       | -2.665695892 |
| CCDC86       | 0.192119641     | 4.668601748        | 3.005315888  | 0.00358221  | 0.024263672      | -2.677728381 |
| ABCC5        | -0.235290393    | 3.279559744        | -2.954374759 | 0.004157032 | 0.027274189      | -2.677918091 |
| LARP4        | 0.283415294     | 5.145740453        | 3.024761351  | 0.003382927 | 0.023153298      | -2.67883691  |
| SULT1B1      | -0.518108653    | -0.890236848       | -2.698123213 | 0.008569201 | 0.047423379      | -2.679001482 |
| RNF6         | -0.139691115    | 5.070535474        | -3.024490362 | 0.003385632 | 0.023161289      | -2.679823871 |
| MID1IP1      | 0.121669246     | 5.248961084        | 3.025692188  | 0.00337365  | 0.023110809      | -2.681203833 |
| STK11IP      | -0.122696583    | 3.609246095        | -2.965192355 | 0.004028263 | 0.026614805      | -2.68129809  |
| BCAP29       | 0.095423703     | 6.008662888        | 3.033455541  | 0.003297198 | 0.022669555      | -2.682195838 |
| HAS3         | 0.546602227     | -1.67712824        | 2.682817736  | 0.008935391 | 0.048893109      | -2.683150533 |
| XKR8         | 0.175352236     | 2.774954883        | 2.895830989  | 0.004922437 | 0.030948079      | -2.687119638 |
| JKAMP        | 0.187477871     | 4.33498359         | 3.000647665  | 0.003631645 | 0.024510349      | -2.687350679 |
| NKAPL        | -0.351672335    | 0.015224228        | -2.746342109 | 0.007503188 | 0.042571758      | -2.689328211 |
| HEATR3       | -0.20490328     | 3.43733902         | -2.947868656 | 0.004236302 | 0.027649763      | -2.691029329 |
| FLAD1        | -0.163554702    | 3.921926493        | -2.974576471 | 0.003919558 | 0.02606809       | -2.692078954 |
| PEX14        | -0.16973441     | 3.954841805        | -2.981891184 | 0.003836716 | 0.025618922      | -2.692727358 |
| INTS1        | -0.123914576    | 6.969495228        | -3.03076099  | 0.00332355  | 0.022798702      | -2.693249575 |
| SUOX         | -0.121803397    | 3.940776992        | -2.987247642 | 0.003777084 | 0.025321756      | -2.694040921 |
| ACVR1C       | -0.5218896      | -1.251778051       | -2.683779098 | 0.00891977  | 0.048782711      | -2.694671426 |
| HAUS3        | 0.23308455      | 2.308327909        | 2.873632384  | 0.005245201 | 0.032475833      | -2.694914107 |
| SCAMP1-AS1   | 0.301179078     | -0.001218142       | 2.737428152  | 0.007690627 | 0.043504168      | -2.695399918 |
| CENPI        | -0.327976244    | 0.98074533         | -2.79822993  | 0.006492602 | 0.038309659      | -2.697373685 |
| ARL4A        | -0.289848336    | 2.033279854        | -2.904363935 | 0.004803319 | 0.030363913      | -2.701368925 |
| DFFA         | -0.095955065    | 5.329400508        | -3.01827453  | 0.003448232 | 0.02349352       | -2.701715737 |
| DPH2         | 0.164950595     | 3.731903902        | 2.956982192  | 0.004125651 | 0.027151071      | -2.702735252 |
| CHEK1        | -0.165857133    | 3.678873952        | -2.966068483 | 0.004017997 | 0.026558627      | -2.70381311  |
| DTNBP1       | -0.198104202    | 3.781533889        | -2.976284122 | 0.003900071 | 0.025949945      | -2.705293248 |
| LOC105378753 | 0.37085174      | -1.01622841        | 2.682264833  | 0.008948882 | 0.048922712      | -2.705400847 |
| GPAT4        | -0.106506556    | 6.088295047        | -3.026018281 | 0.003370406 | 0.02309909       | -2.705951025 |
| NUP58        | 0.261971793     | 4.356560612        | 2.988775059  | 0.003760237 | 0.025231275      | -2.707794221 |
| HJURP        | -0.361349928    | 1.620401551        | -2.818574703 | 0.006131635 | 0.036682664      | -2.712069726 |
| SEMA4G       | -0.295077834    | 0.190312044        | -2.748811224 | 0.007452012 | 0.042345192      | -2.71222398  |
| ZWILCH       | 0.159655346     | 3.50706922         | 2.944788615  | 0.004274314 | 0.027861649      | -2.712617505 |
| STX12        | 0.116264462     | 6.341301696        | 3.023535564  | 0.003395179 | 0.023216056      | -2.715590521 |
| TMEM229B     | -0.201809213    | 1.304708493        | -2.81272009  | 0.006233575 | 0.037130319      | -2.721311374 |
| KBTD4        | -0.151430572    | 2.611367335        | -2.892506442 | 0.00496958  | 0.031123059      | -2.72440101  |
| CAPN10       | -0.212931092    | 2.319472304        | -2.893764598 | 0.004951691 | 0.031054233      | -2.726717357 |
| VPS37D       | 0.230694613     | 1.784647896        | 2.822036092  | 0.006072088 | 0.036427689      | -2.729029833 |
| LIMS1        | 0.156853102     | 6.51713682         | 3.016246026  | 0.003468893 | 0.025521606      | -2.735524856 |
| TBC1D8       | -0.189367646    | 4.023022301        | -2.970762072 | 0.003963412 | 0.026255427      | -2.738411381 |
| LRRC49       | 0.126941681     | 3.42588736         | 2.938537516  | 0.004352433 | 0.028236459      | -2.739146177 |
| TSPYL2       | 0.161546478     | 4.562315945        | 2.97289926   | 0.003938785 | 0.026172855      | -2.740664112 |
| MLH3         | -0.172347669    | 2.875657819        | -2.895502667 | 0.004927075 | 0.030964311      | -2.740953513 |
| C2CD3        | -0.179028259    | 3.703373678        | -2.951513063 | 0.004191728 | 0.027418236      | -2.742231732 |
| DNAJC6       | 0.433595356     | -0.046261575       | 2.706034292  | 0.008385335 | 0.046697484      | -2.743129845 |
| SCP2         | 0.074873236     | 7.026234992        | 3.012150046  | 0.003510962 | 0.023834671      | -2.743150034 |
| FAM3C        | 0.167320995     | 4.078546492        | 2.957057471  | 0.004124748 | 0.027151071      | -2.7490935   |
| RAD51D       | -0.098321394    | 3.479534448        | -2.933809445 | 0.004412394 | 0.028551674      | -2.751992946 |
| NUDT5        | 0.089315676     | 5.583703083        | 3.003485925  | 0.003601514 | 0.024361563      | -2.753153414 |
| OPRL1        | -0.251976735    | 0.810471724        | -2.791887537 | 0.006609055 | 0.0388598        | -2.753219914 |
| CHORDC1      | -0.181704337    | 3.79825457         | -2.92941363  | 0.004468824 | 0.028817794      | -2.753876407 |
| MOB2         | -0.157102571    | 4.081970548        | -2.958159742 | 0.00411155  | 0.027081938      | -2.754861479 |
| SRSF2        | 0.155425212     | 5.800198373        | 2.999353084  | 0.003645466 | 0.024558096      | -2.760647492 |
| PRRC1        | 0.242381578     | 6.584779433        | 3.00631083   | 0.003571754 | 0.024203738      | -2.762856621 |
| UBALD1       | -0.217287485    | 4.54506132         | -2.98472118  | 0.003805102 | 0.025468758      | -2.763568974 |
| KBTD6        | 0.420194908     | 3.732222741        | 2.915075821  | 0.004657549 | 0.02967907       | -2.76439649  |
| SUPT5H       | -0.076366267    | 7.262362968        | -3.000825921 | 0.003629746 | 0.024510349      | -2.76601172  |
| CMTM7        | -0.196200321    | 3.297640628        | -2.920797938 | 0.004581365 | 0.029307794      | -2.769685814 |
| ALPK1        | -0.157485131    | 3.877307704        | -2.95555306  | 0.004142824 | 0.027216528      | -2.773538699 |
| CNOT9        | 0.11654516      | 5.654598282        | 2.994840775  | 0.003694021 | 0.024820132      | -2.773936552 |
| RNF2         | 0.112372386     | 4.637927281        | 2.972264384  | 0.003946086 | 0.026198256      | -2.774957939 |
| FAM189B      | -0.144928132    | 5.966650076        | -2.999388868 | 0.003645083 | 0.024558096      | -2.775122681 |
| TDRD7        | -0.139944846    | 3.402196351        | -2.925090047 | 0.004524977 | 0.029055521      | -2.775424833 |
| SPAG1        | 0.194089596     | 1.672114102        | 2.815348967  | 0.00618761  | 0.036944179      | -2.775490353 |
| MPLZ1        | 0.099352502     | 7.578806341        | 2.994394221  | 0.003698859 | 0.024841556      | -2.778336238 |
| SIRT5        | -0.174184159    | 2.359409703        | -2.867407596 | 0.005339145 | 0.03289525       | -2.778534838 |
| TMEM187      | -0.174532459    | 2.565678547        | -2.886314502 | 0.005058495 | 0.031501103      | -2.778685118 |

| Gene      | Log fold change | Average Expression | t            | P-value     | Adjusted P-value | B            |
|-----------|-----------------|--------------------|--------------|-------------|------------------|--------------|
| USP36     | 0.178264834     | 5.900659722        | 2.997777279  | 0.003662355 | 0.024629337      | -2.78177797  |
| MYBL1     | -0.34158146     | 0.815617791        | -2.741951329 | 0.007594987 | 0.04301161       | -2.783936568 |
| ZBTB18    | 0.210614608     | 2.312806471        | 2.852189506  | 0.005575378 | 0.034030589      | -2.786234948 |
| ZNF316    | 0.146399529     | 4.86444271         | 2.979847156  | 0.003859701 | 0.025760979      | -2.787083244 |
| ZFHX4     | -0.323090986    | 4.614277019        | -2.964117918 | 0.004040886 | 0.026686499      | -2.78724037  |
| MRM2      | 0.092339439     | 4.44812478         | 2.959753294  | 0.004092539 | 0.026980313      | -2.787512975 |
| MTF2      | -0.171801999    | 2.718002735        | -2.861462638 | 0.005430311 | 0.033375033      | -2.787871698 |
| RALGAPA2  | -0.350486834    | 1.793719229        | -2.852926525 | 0.005563719 | 0.033986968      | -2.788266288 |
| PIK3CD    | -0.214202136    | 3.171888928        | -2.88725733  | 0.005044862 | 0.031430757      | -2.788866247 |
| RBM38     | 0.179613317     | 3.228707059        | 2.893025376  | 0.004962194 | 0.031107157      | -2.789645901 |
| SLC25A19  | -0.211767459    | 1.40027883         | -2.780254248 | 0.006827644 | 0.039803265      | -2.790591883 |
| EIF2B4    | -0.153455411    | 4.922494569        | -2.970218089 | 0.003969703 | 0.026273993      | -2.798529819 |
| PNPT1     | 0.13525395      | 4.003010283        | 2.942516749  | 0.004302554 | 0.027997269      | -2.800270616 |
| NBAS      | -0.143637385    | 6.335277839        | -2.992113803 | 0.003723655 | 0.024996944      | -2.800731405 |
| AK2       | 0.085517683     | 5.600294725        | 2.983730944  | 0.003816137 | 0.025515438      | -2.806063498 |
| FAM50B    | -0.219378265    | 2.674194203        | -2.87143325  | 0.005278215 | 0.032619093      | -2.80790876  |
| MAP6D1    | 0.192734457     | 1.426853227        | 2.760871469  | 0.007206603 | 0.041356294      | -2.811367354 |
| ZBTB45    | -0.126949915    | 4.443433278        | -2.954440309 | 0.004156241 | 0.027274189      | -2.813503766 |
| RNASL     | -0.174116687    | 4.22633604         | -2.941582493 | 0.004314217 | 0.02804893       | -2.815721137 |
| IL4R      | -0.125076511    | 5.491598057        | -2.977778999 | 0.003883086 | 0.025859776      | -2.816363128 |
| CCDC85B   | -0.277104299    | 6.94206842         | -2.983353837 | 0.003820346 | 0.025520931      | -2.81763525  |
| MRPL42    | 0.136432331     | 4.912236111        | 2.963664847  | 0.00404622  | 0.026710014      | -2.820998272 |
| SUV39H2   | 0.215874439     | 2.765080786        | 2.85220089   | 0.005575198 | 0.034030589      | -2.824355113 |
| RAB6A     | 0.090161589     | 6.573474711        | 2.98337035   | 0.003820162 | 0.025520931      | -2.825034643 |
| POLR2K    | 0.112286031     | 4.878603514        | 2.96023373   | 0.004086824 | 0.026966235      | -2.825463788 |
| FAM219A   | -0.132447139    | 3.77377259         | -2.920018642 | 0.004591672 | 0.029346183      | -2.825567907 |
| KIAA1549  | -0.265523639    | 3.858527508        | -2.920766925 | 0.004581775 | 0.029307794      | -2.825996407 |
| UBAP2L    | -0.090888307    | 7.63042235         | -2.977014812 | 0.003891761 | 0.02590609       | -2.826906095 |
| DIABLO    | 0.177359115     | 2.227421616        | 2.824396307  | 0.006031789 | 0.036229215      | -2.830682734 |
| TSNAX     | 0.152148538     | 4.106706851        | 2.928230122  | 0.004484131 | 0.028904127      | -2.831461602 |
| AKTIP     | 0.153052339     | 3.049747786        | 2.892561688  | 0.004968794 | 0.031123059      | -2.83248998  |
| ZNF720    | -0.131944391    | 2.762949983        | -2.871688757 | 0.005274369 | 0.032619093      | -2.833632068 |
| TFG       | 0.080724042     | 6.724681239        | 2.979495966  | 0.003863662 | 0.025764591      | -2.835378563 |
| ZNF324    | 0.151054902     | 3.065314411        | 2.878890216  | 0.005167038 | 0.032057766      | -2.836447541 |
| CHST2     | 0.147359879     | 3.762249205        | 2.904451285  | 0.004802114 | 0.030363913      | -2.841237735 |
| TMEM120B  | -0.215602242    | 2.675703675        | -2.847692013 | 0.005647012 | 0.034342621      | -2.842003224 |
| ATXN7     | -0.219467881    | 3.938032486        | -2.9265986   | 0.004505311 | 0.028966284      | -2.84539477  |
| TRA2B     | 0.098349306     | 6.108099213        | 2.971943045  | 0.003949786 | 0.026208132      | -2.85280481  |
| CD55      | 0.100830226     | 5.940924662        | 2.971227398  | 0.003958038 | 0.026231362      | -2.852814882 |
| RNF31     | 0.176071543     | 3.693056092        | 2.891008957  | 0.004990951 | 0.031209499      | -2.852845507 |
| ZNF653    | -0.234715545    | 0.736641585        | -2.725542793 | 0.007947203 | 0.044703761      | -2.8546487   |
| PPP1R3G   | 0.204642654     | 2.588271953        | 2.823260051  | 0.006051159 | 0.036316597      | -2.85770189  |
| SYNE1     | -0.199391915    | 6.000703597        | -2.968544989 | 0.00398911  | 0.026384467      | -2.857746112 |
| NAA25     | 0.272783276     | 3.741589155        | 2.890673655  | 0.004995747 | 0.031213579      | -2.858179303 |
| ANGEL1    | -0.190620674    | 3.175233398        | -2.883248132 | 0.005103068 | 0.031713125      | -2.859181598 |
| SLC37A1   | -0.254543938    | 0.11899011         | -2.696232811 | 0.008613677 | 0.04759957       | -2.863146548 |
| MAP2K4    | 0.120383617     | 4.519402397        | 2.934637136  | 0.004401842 | 0.028495639      | -2.868430495 |
| INTS10    | 0.091351827     | 5.112659668        | 2.954899904  | 0.004150694 | 0.027256347      | -2.868575193 |
| LINC00662 | -0.176508605    | 2.523012358        | -2.84557645  | 0.005681    | 0.034479686      | -2.869979889 |
| RNF11     | 0.097220187     | 7.481118996        | 2.960071954  | 0.004088748 | 0.026967117      | -2.873743275 |
| CNOT4     | 0.147728597     | 4.599041802        | 2.929992579  | 0.004461354 | 0.028781943      | -2.879388732 |
| FANCA     | -0.290201918    | 0.966374697        | -2.712818291 | 0.008230539 | 0.045937322      | -2.879499434 |
| KLHL22    | -0.122491904    | 4.595273876        | -2.928018706 | 0.00448687  | 0.02890911       | -2.886986827 |
| FAM214B   | -0.167266023    | 4.182907705        | -2.90780818  | 0.004765963 | 0.030216526      | -2.888256555 |
| WDR41     | -0.096423331    | 5.296737261        | -2.948893046 | 0.004223729 | 0.02759161       | -2.889077425 |
| HARBI1    | -0.231205576    | 1.552577725        | -2.736940399 | 0.007701005 | 0.043546526      | -2.890036218 |
| ZMIZ1     | -0.216696359    | 8.005195612        | -2.951838298 | 0.004187772 | 0.027416164      | -2.890309224 |
| EIF3E     | 0.115610354     | 8.932636912        | 2.925886412  | 0.004514585 | 0.02901353       | -2.891493094 |
| DDX19B    | 0.164768623     | 3.043409225        | 2.861016579  | 0.005437209 | 0.033403798      | -2.895272407 |
| ZNF407    | -0.219311984    | 4.171562389        | -2.890729127 | 0.004994954 | 0.031213579      | -2.895326404 |
| SMARCC2   | -0.10157008     | 6.136754647        | -2.955982789 | 0.004137653 | 0.027194418      | -2.896879845 |
| MRTO4     | 0.128774101     | 5.17576301         | 2.937444916  | 0.004366222 | 0.02831372       | -2.900678528 |
| NKTR      | -0.292730836    | 3.636434421        | -2.882622095 | 0.005112212 | 0.031753904      | -2.901977877 |
| TMEM44    | -0.175882275    | 3.784954949        | -2.900784804 | 0.004852956 | 0.030613453      | -2.902556722 |
| MAPK1IP1L | 0.109279122     | 6.291143158        | 2.952952833  | 0.004174239 | 0.027351342      | -2.905807198 |
| RAC1      | 0.068623811     | 7.833008801        | 2.942041898  | 0.004308479 | 0.028023714      | -2.90792164  |
| CHPT1     | 0.092240873     | 5.60030047         | 2.944599293  | 0.004276661 | 0.027864889      | -2.908178257 |
| TMEM50A   | 0.093056625     | 7.375077388        | 2.946606644  | 0.004251839 | 0.027739153      | -2.911946172 |
| ZNF430    | 0.231368203     | 2.358766109        | 2.783625412  | 0.006763628 | 0.039518697      | -2.916943852 |
| EXOC2     | -0.114988721    | 4.851660866        | -2.927545818 | 0.004493003 | 0.028914673      | -2.917249996 |

| Gene       | Log fold change | Average Expression | t            | P-value     | Adjusted P-value | B            |
|------------|-----------------|--------------------|--------------|-------------|------------------|--------------|
| FBXO46     | 0.151738733     | 2.581617724        | 2.807903488  | 0.006318606 | 0.037532916      | -2.920735368 |
| PGS1       | -0.1362853      | 3.820448266        | -2.891174398 | 0.004988586 | 0.031209499      | -2.924109303 |
| ZNF675     | 0.235786038     | 1.479333014        | 2.718714094  | 0.008098131 | 0.045390836      | -2.924391404 |
| ZBTB2      | 0.096129147     | 5.518951245        | 2.93720138   | 0.004369301 | 0.028321494      | -2.92610269  |
| PSMA4      | 0.120419247     | 6.54177769         | 2.944214842  | 0.00428143  | 0.027883902      | -2.92965327  |
| MIR4458HG  | 0.1929502       | 1.967177815        | 2.789352863  | 0.006656128 | 0.039080071      | -2.931584503 |
| TRIM4      | -0.103313131    | 5.386791152        | -2.930921116 | 0.004449397 | 0.028754063      | -2.933473529 |
| SLC20A2    | 0.219981444     | 5.443241045        | 2.922583991  | 0.004557822 | 0.029191766      | -2.934017926 |
| CCDC102A   | -0.192348564    | 3.690003772        | -2.877613348 | 0.00518592  | 0.032148438      | -2.935177253 |
| TNRC6A     | 0.26139665      | 5.233742466        | 2.922422724  | 0.004559943 | 0.029192939      | -2.936122279 |
| EVA1A      | 0.220651418     | 4.040942249        | 2.908827686  | 0.004742071 | 0.030128453      | -2.93926888  |
| ASPA       | 0.183864881     | 2.585043415        | 2.803763961  | 0.006392532 | 0.03786752       | -2.940115507 |
| GLT8D1     | 0.07585875      | 6.13484407         | 2.938695727  | 0.00435044  | 0.028235687      | -2.942363339 |
| CHKA       | 0.186656641     | 3.453655623        | 2.84312013   | 0.005720698 | 0.03466476       | -2.944506426 |
| ARRDC1-AS1 | -0.191444136    | 2.304221326        | -2.788488316 | 0.006672254 | 0.039154978      | -2.944902277 |
| C19orf48   | 0.11651963      | 4.472322093        | 2.90283196   | 0.004824508 | 0.030472278      | -2.945101347 |
| H3F3A      | 0.291193212     | 0.730398521        | 2.675390206  | 0.009118184 | 0.04957669       | -2.95115739  |
| SRSF10     | -0.100830774    | 5.639692449        | -2.930088899 | 0.004460112 | 0.028781943      | -2.951762198 |
| ZNF160     | 0.225888843     | 4.132474462        | 2.877695375  | 0.005184705 | 0.032148438      | -2.953802012 |
| DHFR2      | -0.140027532    | 3.266192863        | -2.853485678 | 0.005554889 | 0.033967893      | -2.95493858  |
| ASB8       | -0.101461707    | 4.465932067        | -2.894234507 | 0.004945024 | 0.031025342      | -2.958333068 |
| POMGNT1    | -0.120335416    | 5.241608701        | -2.922828077 | 0.004554613 | 0.029183623      | -2.959238006 |
| GOLGA5     | 0.07875004      | 6.028088836        | 2.930373752  | 0.004456442 | 0.028781943      | -2.96023453  |
| BAMBI      | 0.338298623     | 1.101114496        | 2.68825186   | 0.008803776 | 0.048401491      | -2.960571592 |
| ZSCAN31    | -0.305936743    | 0.756172308        | -2.677596942 | 0.009063524 | 0.049345814      | -2.961627975 |
| RASAL2     | 0.306969632     | 5.004305336        | 2.89787203   | 0.0048937   | 0.030805972      | -2.96174226  |
| ACTA2      | -0.13513835     | 6.35846942         | -2.93200723  | 0.004435449 | 0.028676226      | -2.961785006 |
| PTBP1      | 0.079317194     | 7.72989333         | 2.924905526  | 0.004527388 | 0.029058616      | -2.962338601 |
| LYRM4-AS1  | -0.177896006    | 2.226678347        | -2.779313811 | 0.006845601 | 0.039846268      | -2.96330642  |
| C18orf32   | -0.238497294    | 1.267396826        | -2.701589475 | 0.008488192 | 0.047113531      | -2.965540631 |
| KIAA1328   | -0.211463764    | 1.627271401        | -2.751273443 | 0.007401297 | 0.042136484      | -2.967507228 |
| PHIP       | -0.26265563     | 4.657955157        | -2.898055946 | 0.004891118 | 0.030805972      | -2.967525854 |
| RETSAT     | -0.095242086    | 5.984234506        | -2.926616207 | 0.004505082 | 0.028966284      | -2.971790139 |
| RPGR       | 0.172978406     | 1.789116968        | 2.758727902  | 0.007249674 | 0.041508586      | -2.97184841  |
| INTS9      | -0.111537733    | 3.83151495         | -2.871370109 | 0.005279165 | 0.032619093      | -2.973746588 |
| PTRH2      | 0.167880223     | 4.238067202        | 2.884736409  | 0.005081389 | 0.031630598      | -2.975008416 |
| IRGQ       | 0.265985156     | 3.743825883        | 2.865198945  | 0.005372849 | 0.033059776      | -2.975891118 |
| NFIL3      | -0.174934107    | 5.801989246        | -2.925125897 | 0.004524509 | 0.029055521      | -2.976510667 |
| SMIM10L1   | 0.157180574     | 4.699172725        | 2.901346338  | 0.004845137 | 0.030589751      | -2.977754362 |
| PRKD2      | -0.123491872    | 4.668302801        | -2.889009021 | 0.005019624 | 0.031323783      | -2.978818388 |
| ENOPH1     | 0.114258759     | 5.071200373        | 2.907475193  | 0.004760553 | 0.030207652      | -2.980082769 |
| ARAF       | -0.102551077    | 5.751858913        | -2.920145907 | 0.004589988 | 0.029346183      | -2.981621249 |
| ZNF121     | 0.436569748     | 3.244370775        | 2.844600923  | 0.005696735 | 0.034539598      | -2.983289186 |
| AKAP10     | -0.182698924    | 3.946106452        | -2.862216425 | 0.005418673 | 0.033317098      | -2.986615517 |
| CNTRL      | -0.198471249    | 2.332803689        | -2.781796139 | 0.006798296 | 0.039662873      | -2.987353253 |
| PDE12      | 0.1744545       | 4.810012686        | 2.899807072  | 0.004866597 | 0.030683812      | -2.988023186 |
| TRMT10C    | 0.13187431      | 4.573374928        | 2.896964529  | 0.004906458 | 0.030873386      | -2.99010569  |
| SH2B3      | 0.207915845     | 5.366836049        | 2.910065113  | 0.00472522  | 0.030046737      | -2.991233844 |
| C17orf97   | -0.288916672    | 1.192324686        | -2.672105221 | 0.009200109 | 0.049888567      | -2.991730174 |
| ABI2       | -0.091219466    | 5.461755579        | -2.909603799 | 0.004731496 | 0.030073948      | -2.996709154 |
| NAA40      | -0.18027178     | 2.827024219        | -2.808633182 | 0.006305656 | 0.037470769      | -2.997857547 |
| RFC5       | 0.145989095     | 2.778875903        | 2.80411625   | 0.00638621  | 0.037865509      | -2.999755041 |
| ADGRB2     | -0.137716391    | 3.787978763        | -2.853396397 | 0.005556298 | 0.033967893      | -3.002309166 |
| ZDHHC8     | -0.088442937    | 5.922642323        | -2.913806461 | 0.004674607 | 0.029775173      | -3.003398283 |
| DNAJC27    | 0.254082199     | 1.988949786        | 2.720705462  | 0.00805385  | 0.045202381      | -3.00472239  |
| ZNF597     | -0.188334662    | 2.451860231        | -2.779354384 | 0.006844826 | 0.039846268      | -3.005842442 |
| PLEKHG2    | -0.150009631    | 4.956632951        | -2.896207651 | 0.004917122 | 0.030927571      | -3.008415317 |
| H2AFZ      | 0.138706772     | 6.00087707         | 2.912335532  | 0.004694446 | 0.029876272      | -3.008956113 |
| DDX18      | 0.165496652     | 5.681502694        | 2.905113313  | 0.004792986 | 0.030349536      | -3.010336729 |
| SLC25A43   | 0.09426395      | 5.142185242        | 2.897973     | 0.004892282 | 0.030805972      | -3.010543068 |
| TNPO2      | -0.145249554    | 5.985155998        | -2.910392753 | 0.004720768 | 0.030031102      | -3.011008096 |
| WHAMM      | 0.200767016     | 2.558693917        | 2.779886449  | 0.006834662 | 0.039828763      | -3.013541431 |
| MDH1       | 0.090831073     | 6.580344457        | 2.912401986  | 0.004693548 | 0.029876272      | -3.013836874 |
| ZNF133     | 0.156948009     | 2.821633821        | 2.769762213  | 0.007030449 | 0.040654703      | -3.014576704 |
| FAM161A    | -0.20107015     | 1.333315331        | -2.686722773 | 0.008840631 | 0.048550954      | -3.014770959 |
| TGDS       | 0.155726646     | 2.305355821        | 2.753925256  | 0.00734703  | 0.04189037       | -3.017862607 |
| MAGO8      | 0.201415295     | 4.065120779        | 2.860023075  | 0.005452601 | 0.033484706      | -3.022696569 |
| CASC4      | 0.127930945     | 6.669405792        | 2.90852569   | 0.004746192 | 0.030141923      | -3.023710469 |
| ITM2B      | 0.064380068     | 8.548015968        | 2.882510385  | 0.005113846 | 0.031753904      | -3.029057822 |
| CKAP5      | -0.174340819    | 6.776980433        | -2.906103056 | 0.00477937  | 0.030276045      | -3.029863591 |

| Gene         | Log fold change | Average Expression | t            | P-value     | Adjusted P-value | B            |
|--------------|-----------------|--------------------|--------------|-------------|------------------|--------------|
| AP3S2        | -0.115501554    | 4.389465748        | -2.868534925 | 0.005322018 | 0.032843455      | -3.032214665 |
| ARL6IP5      | 0.082316803     | 8.315628698        | 2.883810723  | 0.005094863 | 0.031675203      | -3.035509723 |
| DIP2A        | -0.192619612    | 4.319463277        | -2.868030467 | 0.005329676 | 0.032877247      | -3.035538249 |
| ARID4A       | -0.30127751     | 3.671345398        | -2.82018864  | 0.006103803 | 0.036545189      | -3.036927901 |
| SQSTM1       | -0.10008297     | 9.052085219        | -2.86745161  | 0.005338476 | 0.03289525       | -3.039590089 |
| MKNK1        | 0.129360716     | 3.842752584        | 2.853953066  | 0.005547518 | 0.033943057      | -3.039659327 |
| ZFP36L1      | 0.214485138     | 8.824299119        | 2.870115115  | 0.005298095 | 0.032722631      | -3.043307933 |
| LAMTOR3      | 0.089296759     | 5.231015097        | 2.887609661  | 0.005039776 | 0.031423506      | -3.045153944 |
| GTF2A2       | 0.165642873     | 4.92176147         | 2.88016436   | 0.005148259 | 0.031954416      | -3.046765    |
| RPIA         | 0.127474062     | 3.82582972         | 2.835727165  | 0.005841724 | 0.035270435      | -3.047288765 |
| ORAI3        | -0.197258234    | 3.935113285        | -2.840672888 | 0.005760503 | 0.034863887      | -3.047913775 |
| TMCO6        | -0.202027549    | 1.726678436        | -2.706170166 | 0.008382209 | 0.046697337      | -3.048658847 |
| THAP12       | 0.153098025     | 4.413666259        | 2.858129467  | 0.00548205  | 0.033610744      | -3.052344373 |
| LOC100129940 | -0.196724587    | 2.07477141         | -2.734616619 | 0.007750628 | 0.043794247      | -3.053519297 |
| CABLES1      | -0.162529731    | 5.350006316        | -2.889222338 | 0.005016558 | 0.031317626      | -3.055888419 |
| PIEZO1       | -0.148036471    | 7.347436478        | -2.891142455 | 0.004989042 | 0.031209499      | -3.058264843 |
| PSMC2        | 0.108579876     | 6.331468364        | 2.894625475  | 0.004939484 | 0.031007625      | -3.058480236 |
| CAPZA1       | 0.104644339     | 6.69996793         | 2.894579026  | 0.004940142 | 0.031007625      | -3.06051324  |
| FAM107B      | 0.242234095     | 4.682990478        | 2.865082757  | 0.005374628 | 0.033059776      | -3.065345988 |
| ZNF444       | -0.190194061    | 4.009107817        | -2.839083921 | 0.005786484 | 0.035007065      | -3.065424158 |
| BDKRB1       | 0.26822621      | 4.050191758        | 2.84941224   | 0.005619514 | 0.034216796      | -3.066395    |
| RARS2        | 0.081273202     | 5.567643218        | 2.883955323  | 0.005092756 | 0.031675177      | -3.067348212 |
| ZNF225       | 0.193649991     | 2.83235177         | 2.758029699  | 0.007263754 | 0.041543927      | -3.06783214  |
| PPIA         | 0.140121117     | 6.187815449        | 2.889506186  | 0.005012482 | 0.031305151      | -3.070860629 |
| WDR53        | 0.158349784     | 2.208256013        | 2.728232019  | 0.007888475 | 0.044456409      | -3.073186088 |
| ARHGAP22     | -0.195762089    | 5.005111097        | -2.867251041 | 0.005341528 | 0.032896475      | -3.073484842 |
| GLIS2        | 0.142959765     | 6.677582351        | 2.888809342  | 0.005022495 | 0.031328721      | -3.074877555 |
| CFAP69       | 0.178771982     | 1.854568087        | 2.7151647    | 0.008177608 | 0.04574359       | -3.077080632 |
| TMEM241      | -0.179647434    | 2.033658324        | -2.727206723 | 0.007910819 | 0.044548999      | -3.080978048 |
| URB2         | 0.34661474      | 3.619618995        | 2.823724091  | 0.006043242 | 0.036283536      | -3.081435847 |
| SHPRH        | -0.433356853    | 2.133883004        | -2.706632501 | 0.00837158  | 0.046655374      | -3.082012634 |
| GLE1         | -0.123896232    | 5.053297747        | -2.866862063 | 0.005347452 | 0.032919501      | -3.087290599 |
| ID3          | 0.322283394     | 5.613528326        | 2.884153557  | 0.005089869 | 0.031670296      | -3.087399791 |
| DENND4C      | -0.341473119    | 4.626380159        | -2.844856101 | 0.005692615 | 0.034536271      | -3.089158811 |
| FITM2        | -0.239618016    | 3.640306377        | -2.814465155 | 0.006203029 | 0.037021563      | -3.094393075 |
| HDDC3        | -0.174087123    | 1.935764062        | -2.715426939 | 0.008171712 | 0.045737608      | -3.095745197 |
| REXO4        | -0.100913417    | 4.968767575        | -2.858548478 | 0.005475521 | 0.033598064      | -3.09657037  |
| ETAA1        | -0.176037695    | 3.007119561        | -2.766645191 | 0.007091754 | 0.04088411       | -3.097037694 |
| TAF1         | -0.287214388    | 4.297093765        | -2.833573647 | 0.005877418 | 0.035457521      | -3.098403978 |
| NT5DC3       | 0.294657963     | 1.838438926        | 2.713175833  | 0.008222453 | 0.045912586      | -3.100139871 |
| C19orf25     | -0.139539541    | 3.626277342        | -2.803909622 | 0.006389917 | 0.037866922      | -3.10268341  |
| CTDP1        | -0.094891326    | 4.631337486        | -2.847549403 | 0.005649297 | 0.034342621      | -3.10322434  |
| SYF2         | 0.144163805     | 5.929244977        | 2.875057989  | 0.005223901 | 0.032370564      | -3.104353961 |
| ACTL6A       | 0.083511807     | 4.868959842        | 2.853266947  | 0.005558342 | 0.033967893      | -3.10967347  |
| DCLRE1B      | 0.167690408     | 3.266535632        | 2.770451336  | 0.007016962 | 0.040608341      | -3.116078852 |
| TAP2         | 0.1213191       | 3.382862339        | 2.782870411  | 0.006777917 | 0.039559297      | -3.116181775 |
| NPM1         | 0.128212587     | 8.004633134        | 2.855941634  | 0.005516256 | 0.033792958      | -3.124898769 |
| RAD54L2      | 0.228799802     | 3.904257645        | 2.800313112  | 0.006454765 | 0.03816114       | -3.125231027 |
| MOV10        | -0.093917241    | 4.933693466        | -2.847615341 | 0.005648241 | 0.034342621      | -3.132840328 |
| FAM13B       | -0.215333279    | 5.065322747        | -2.851975963 | 0.00557876  | 0.034032929      | -3.133604906 |
| SNRNP27      | 0.12950304      | 4.236216915        | 2.827357365  | 0.005981579 | 0.035999405      | -3.136634688 |
| STAR9D       | -0.306291729    | 2.480107704        | -2.701078402 | 0.008500092 | 0.047162204      | -3.138214093 |
| RFTN2        | -0.179221525    | 3.17546814         | -2.780562309 | 0.006821772 | 0.039784424      | -3.138673019 |
| RNF138       | 0.135623441     | 3.544573481        | 2.801126063  | 0.006440055 | 0.038089117      | -3.139621139 |
| TIMM8A       | 0.175418518     | 2.062067305        | 2.681521121  | 0.008967059 | 0.048995201      | -3.140163242 |
| ANKMY2       | -0.145911609    | 4.288890374        | -2.825928388 | 0.006005762 | 0.036088705      | -3.141263972 |
| SLC25A38     | 0.08461586      | 5.070807248        | 2.845743582  | 0.005678308 | 0.034477239      | -3.142586336 |
| ELAC2        | -0.08812187     | 5.660476503        | -2.851880059 | 0.00558028  | 0.034032929      | -3.15526033  |
| ZBTB25       | -0.173159037    | 2.22335341         | -2.692589173 | 0.008699996 | 0.047953437      | -3.158625219 |
| PSIP1        | 0.088856367     | 6.136290999        | 2.8553148    | 0.005526093 | 0.033825706      | -3.159988186 |
| UAP1L1       | -0.146205922    | 5.523121159        | -2.847558619 | 0.00564915  | 0.034342621      | -3.160945273 |
| RUNX1        | -0.278924202    | 7.370506412        | -2.842196888 | 0.005735685 | 0.034741599      | -3.163394315 |
| PAQR8        | -0.185666667    | 3.454431885        | -2.774194582 | 0.006944111 | 0.040279585      | -3.165150607 |
| FUT10        | -0.244931446    | 3.377334006        | -2.758587054 | 0.007252512 | 0.04150906       | -3.16627118  |
| GTPBP2       | 0.208024305     | 4.262402475        | 2.813104468  | 0.006226835 | 0.037104843      | -3.173011827 |
| MIA3         | -0.137205024    | 6.830592882        | -2.850778535 | 0.005597761 | 0.034111921      | -3.173394498 |
| CNST         | 0.207322842     | 4.559824355        | 2.831565441  | 0.005910885 | 0.035645142      | -3.175159236 |
| SLC2A3       | -0.201641408    | 5.69424123         | -2.850036007 | 0.005609573 | 0.03417008       | -3.176423907 |
| MFSD14B      | 0.125674884     | 5.44906755         | 2.838507934  | 0.005795928 | 0.035036061      | -3.177455442 |
| ACACB        | -0.199508831    | 2.376808116        | -2.709181723 | 0.00831319  | 0.046364272      | -3.180915816 |

| Gene       | Log fold change | Average Expression | t            | P-value     | Adjusted P-value | B            |
|------------|-----------------|--------------------|--------------|-------------|------------------|--------------|
| FAM89A     | 0.190287538     | 2.156780494        | 2.687453942  | 0.008822991 | 0.048489431      | -3.184694105 |
| SP100      | 0.08344221      | 6.251728385        | 2.846262807  | 0.005669953 | 0.034440389      | -3.185819141 |
| SMG6       | -0.216518655    | 5.2030081          | -2.825914356 | 0.006006    | 0.036088705      | -3.193790687 |
| C7orf73    | 0.104205549     | 5.737698891        | 2.836799505  | 0.005824025 | 0.03517767       | -3.197269537 |
| MKS1       | -0.170180501    | 2.206294515        | -2.713149032 | 0.008223059 | 0.045912586      | -3.201931248 |
| PRDM10     | 0.275390657     | 3.067861748        | 2.719230638  | 0.008086623 | 0.045352529      | -3.202332843 |
| SGMS1      | 0.131312028     | 4.69077833         | 2.819490516  | 0.006115828 | 0.036602635      | -3.202714843 |
| ZFAT       | -0.104134692    | 3.585641502        | -2.764917934 | 0.007125935 | 0.041019059      | -3.205262979 |
| RABGGTB    | 0.126554061     | 4.330407765        | 2.798710403  | 0.006483857 | 0.038277315      | -3.207411266 |
| ASB13      | 0.168736957     | 3.853794379        | 2.759358229  | 0.007236984 | 0.041499023      | -3.207570952 |
| MTMR4      | -0.201517789    | 4.293015998        | -2.797060297 | 0.006513935 | 0.038405449      | -3.208773549 |
| DCAF10     | -0.127077266    | 5.411794681        | -2.827426043 | 0.005980419 | 0.035999405      | -3.20877367  |
| MARCKS     | 0.083817301     | 8.796832226        | 2.804062993  | 0.006387165 | 0.037865509      | -3.2092558   |
| PEX11B     | -0.12913308     | 4.164759556        | -2.772671921 | 0.006973661 | 0.040419863      | -3.209596464 |
| TSPAN14    | -0.153317326    | 5.552408422        | -2.830506012 | 0.00592861  | 0.035723433      | -3.210514499 |
| TOMM34     | 0.117049304     | 5.009159278        | 2.81381493   | 0.006214394 | 0.037074708      | -3.211520072 |
| TCEAL9     | 0.09251577      | 6.860264701        | 2.835075769  | 0.0058525   | 0.035321338      | -3.214486895 |
| LRR1       | 0.165238621     | 2.383012946        | 2.678477823  | 0.009041788 | 0.04930696       | -3.214749389 |
| MTURN      | 0.110094373     | 5.817215434        | 2.830805538  | 0.005923594 | 0.035707489      | -3.21630576  |
| RUSC1      | -0.119137837    | 5.049675164        | -2.81606984  | 0.006175061 | 0.036883868      | -3.216914357 |
| EVI5L      | -0.122346576    | 5.2497045          | -2.821530664 | 0.006080749 | 0.036465131      | -3.219657568 |
| TRPV4      | -0.181044312    | 2.061267668        | -2.678453721 | 0.009042382 | 0.04930696       | -3.220249161 |
| EIF4ENIF1  | 0.168533263     | 4.348288526        | 2.78543927   | 0.006729412 | 0.039392236      | -3.221472386 |
| NOL10      | 0.095677311     | 4.997356789        | 2.808896635  | 0.006300986 | 0.037457797      | -3.226936947 |
| FDX1       | 0.130910169     | 3.872449527        | 2.777416317  | 0.006881965 | 0.040026994      | -3.226944998 |
| SORBS3     | -0.19319959     | 7.625547937        | -2.820274428 | 0.006102327 | 0.036545189      | -3.227517135 |
| GRK5       | -0.149895135    | 4.616647061        | -2.799270453 | 0.006473678 | 0.038257937      | -3.228788024 |
| PRKCE      | -0.223338839    | 4.232242803        | -2.792954344 | 0.006589334 | 0.038758975      | -3.230371756 |
| CDK13      | 0.147736784     | 5.468153652        | 2.821246469  | 0.006085625 | 0.036479846      | -3.230499406 |
| VAC14      | -0.093778675    | 6.429979329        | -2.828487586 | 0.005962516 | 0.035913371      | -3.232118309 |
| PCNT       | -0.17376192     | 4.826850846        | -2.804870713 | 0.00637269  | 0.037809451      | -3.233349077 |
| NFIX       | -0.163105111    | 9.841390167        | -2.774216965 | 0.006943677 | 0.040279585      | -3.235040106 |
| GRAMD3     | 0.209739122     | 5.098709264        | 2.816669065  | 0.006164647 | 0.036850887      | -3.236359165 |
| NCBP2      | 0.091981201     | 6.311691691        | 2.826182062  | 0.006001463 | 0.036088705      | -3.237241632 |
| TRAM2      | -0.246950704    | 8.080176026        | -2.809482561 | 0.006290613 | 0.037425667      | -3.242698198 |
| RFXANK     | -0.170945277    | 3.880620562        | -2.766882765 | 0.007087064 | 0.040872716      | -3.251494724 |
| POLR1A     | -0.201334679    | 6.056110757        | -2.816121674 | 0.006174159 | 0.036883868      | -3.252040615 |
| MLX        | -0.096018685    | 4.873077169        | -2.798670696 | 0.00648458  | 0.038277315      | -3.252571434 |
| PDE4D      | -0.324149221    | 2.272025149        | -2.736787553 | 0.00770426  | 0.043548585      | -3.253494807 |
| RPGRIP1L   | -0.17418952     | 4.013653497        | -2.767500101 | 0.007074891 | 0.040833778      | -3.254153138 |
| EIF2AK3    | 0.323428487     | 4.190940312        | 2.754987473  | 0.007325395 | 0.041814987      | -3.255988607 |
| POLE3      | 0.090265471     | 5.232075234        | 2.802607993  | 0.006413317 | 0.037496918      | -3.256021236 |
| BAIAP2-AS1 | -0.100815388    | 4.947990367        | -2.79686175  | 0.006517563 | 0.038411804      | -3.257876217 |
| OSBPL6     | -0.213730552    | 3.195223668        | -2.704269512 | 0.008426037 | 0.046854862      | -3.264728525 |
| UPRT       | -0.113163228    | 2.958363393        | -2.707465286 | 0.008352464 | 0.046566068      | -3.267179755 |
| HBP1       | -0.11808729     | 5.95132955         | -2.811912961 | 0.00624775  | 0.03719637       | -3.267478874 |
| CAV2       | 0.137562365     | 5.499013489        | 2.805199617  | 0.006366804 | 0.037789414      | -3.270807333 |
| ARRDC4     | 0.338339943     | 4.172866516        | 2.752130973  | 0.007383708 | 0.042068148      | -3.271976072 |
| GPT2       | -0.153867605    | 3.913298251        | -2.750248278 | 0.007422374 | 0.042208623      | -3.278358136 |
| ZNF142     | -0.161345549    | 4.11726683         | -2.747846163 | 0.007471976 | 0.042410642      | -3.279723958 |
| VPS37C     | 0.096045591     | 4.539893406        | 2.784504009  | 0.006747035 | 0.039455487      | -3.283610411 |
| DHX16      | -0.139773938    | 5.035693197        | -2.784978272 | 0.006738093 | 0.039418501      | -3.284212761 |
| WDR48      | -0.11307229     | 5.220842343        | -2.792986817 | 0.006588735 | 0.038758975      | -3.287321386 |
| CREBBP     | -0.24632735     | 6.552066335        | -2.806445446 | 0.006344554 | 0.037672198      | -3.288633734 |
| ITGA5      | -0.133895779    | 8.743676506        | -2.774371587 | 0.006940683 | 0.040279585      | -3.299482421 |
| VEZF1      | -0.236531761    | 4.949190974        | -2.783648206 | 0.006763197 | 0.039518697      | -3.300183137 |
| RRP9       | 0.168469802     | 4.477660116        | 2.759746849  | 0.007229171 | 0.041470005      | -3.300348094 |
| AP1B1      | -0.083075892    | 5.995006169        | -2.79911933  | 0.006476423 | 0.038259152      | -3.300920773 |
| PCID2      | 0.08600199      | 5.128347447        | 2.786532044  | 0.006708875 | 0.039310077      | -3.302116692 |
| MAP2K7     | 0.082698203     | 4.705857119        | 2.772171377  | 0.0069834   | 0.040460744      | -3.302221547 |
| FAM83G     | 0.200196405     | 3.792847425        | 2.757951167  | 0.007265339 | 0.041543927      | -3.303288203 |
| AASDHPPPT  | 0.082276681     | 4.728699671        | 2.771140721  | 0.007003493 | 0.040553173      | -3.304065838 |
| TSN        | 0.090184836     | 6.157232077        | 2.797908866  | 0.006498452 | 0.038329161      | -3.306847734 |
| MAP4K3     | 0.200069255     | 4.112261692        | 2.747997527  | 0.007468841 | 0.04240883       | -3.312294199 |
| EXTL2      | 0.1348422       | 4.69898131         | 2.764798134  | 0.007128311 | 0.041019059      | -3.312933916 |
| NPRL3      | -0.153361783    | 5.927387028        | -2.794717226 | 0.006556865 | 0.038609624      | -3.313205077 |
| TMEM248    | 0.08133921      | 7.099738069        | 2.794610967  | 0.006558818 | 0.038609624      | -3.315044445 |
| RAPGEF6    | -0.205109848    | 3.240990295        | -2.710947537 | 0.008272963 | 0.046157005      | -3.316108787 |
| ADAL       | -0.123455608    | 2.854314826        | -2.685524854 | 0.008869602 | 0.048621428      | -3.316807699 |
| PPP3R1     | 0.123619778     | 4.977860866        | 2.774630588  | 0.00693567  | 0.040277154      | -3.31793496  |

| Gene     | Log fold change | Average Expression | t            | P-value     | Adjusted P-value | B            |
|----------|-----------------|--------------------|--------------|-------------|------------------|--------------|
| DYNC2LI1 | 0.173522863     | 3.59506619         | 2.732372531  | 0.007798826 | 0.044033553      | -3.318228167 |
| EIF3B    | 0.077571612     | 7.872466218        | 2.785355516  | 0.006730989 | 0.039392236      | -3.31891343  |
| RHOBTB2  | -0.095043977    | 4.862865882        | -2.769628494 | 0.007033069 | 0.040654703      | -3.320469588 |
| PLXNA2   | -0.29816217     | 3.387141399        | -2.70227501  | 0.008472253 | 0.047059744      | -3.320504742 |
| ANAPC16  | 0.125786584     | 5.670623433        | 2.789679195  | 0.00665005  | 0.039070341      | -3.320563401 |
| PSMD7    | 0.083053668     | 5.283024331        | 2.776743217  | 0.006894906 | 0.040086788      | -3.325765607 |
| RHEB     | 0.141046387     | 5.002864234        | 2.768983199  | 0.007045725 | 0.040696627      | -3.326414989 |
| GCN1     | -0.145709774    | 6.938106523        | -2.79077958  | 0.006629594 | 0.038965354      | -3.32782184  |
| MAPKAPK2 | 0.096651984     | 7.425227949        | 2.786518924  | 0.006709122 | 0.039310077      | -3.329812987 |
| RCN2     | 0.091720849     | 6.026079771        | 2.785735957  | 0.006723831 | 0.039380945      | -3.33498049  |
| MTHFD2   | 0.156294898     | 5.931491427        | 2.787294347  | 0.006694583 | 0.03925543       | -3.336130383 |
| EDC3     | -0.110048574    | 4.797389111        | -2.758730267 | 0.007249626 | 0.041508586      | -3.33752039  |
| FAM111A  | -0.166184937    | 4.714747735        | -2.766280655 | 0.007098955 | 0.04090997       | -3.339289596 |
| EIF2B1   | 0.130679721     | 5.445983626        | 2.77783649   | 0.006873897 | 0.039995515      | -3.340333446 |
| GIGYF2   | -0.260782249    | 6.325434053        | -2.783170177 | 0.006772241 | 0.039541486      | -3.344325064 |
| RSBN1    | 0.268871455     | 3.909299609        | 2.716125227  | 0.00815603  | 0.045673769      | -3.344459886 |
| RALBP1   | -0.077219347    | 6.238666056        | -2.783515104 | 0.006765714 | 0.039518697      | -3.346249284 |
| C9orf40  | -0.133647926    | 3.43682433         | -2.704789995 | 0.008414014 | 0.046805285      | -3.346335616 |
| TLN1     | -0.113709273    | 9.865351579        | -2.728085126 | 0.007891672 | 0.044457797      | -3.348744521 |
| ATF4     | -0.176214467    | 7.770699085        | -2.76936756  | 0.007038184 | 0.040668665      | -3.349127757 |
| RENND6A  | -0.170282933    | 3.014455511        | -2.675162168 | 0.00912385  | 0.049582134      | -3.349489874 |
| DNF14    | -0.116666067    | 5.051177022        | -2.761731069 | 0.007189397 | 0.041273277      | -3.351352483 |
| EID2     | 0.145549979     | 3.818092351        | 2.715347283  | 0.008173502 | 0.045737608      | -3.353300798 |
| THUMPD3  | -0.101022261    | 4.838756984        | -2.7566595   | 0.007291458 | 0.041652832      | -3.354090646 |
| PAIP2    | 0.077099145     | 4.596712723        | 2.745878772  | 0.007512827 | 0.042610399      | -3.355274763 |
| NEDD9    | -0.354342358    | 2.620600824        | -2.730542954 | 0.007838324 | 0.044206856      | -3.35537664  |
| AP3B1    | 0.075298258     | 6.252266956        | 2.779391273  | 0.006844121 | 0.039846268      | -3.355662999 |
| DCAF12   | -0.137641776    | 4.67787757         | -2.742333329 | 0.00758696  | 0.04298231       | -3.357102408 |
| CHCHD7   | 0.13705702      | 3.499273544        | 2.700565596  | 0.008512048 | 0.047186729      | -3.358748789 |
| FOXP4    | -0.157623179    | 5.298893118        | -2.764774666 | 0.007128777 | 0.041019059      | -3.359836862 |
| GOT1     | 0.158959358     | 5.087643078        | 2.762313475  | 0.007177761 | 0.041237906      | -3.360806993 |
| C1orf52  | 0.136714799     | 3.976204896        | 2.729887886  | 0.00785251  | 0.044270289      | -3.361724676 |
| EXT1     | 0.110367729     | 8.076924861        | 2.765372644  | 0.007116922 | 0.040997826      | -3.363968689 |
| S7orf49  | -0.127233731    | 3.44350715         | -2.687012572 | 0.008833635 | 0.048530227      | -3.366033828 |
| C1PR3    | 0.258466447     | 5.27247546         | 2.751362313  | 0.007399472 | 0.042136484      | -3.369475564 |
| C1QBP    | 0.15872721      | 6.028495869        | 2.770244085  | 0.007021016 | 0.040616198      | -3.374000672 |
| MAP3K13  | 0.108021664     | 4.276704187        | 2.725704078  | 0.00794367  | 0.044700577      | -3.375602757 |
| PLEKHA1  | -0.167300588    | 4.146543413        | -2.718159622 | 0.00811105  | 0.045435688      | -3.378433986 |
| SARAF    | 0.083311225     | 7.281825937        | 2.767692014  | 0.007071111 | 0.040827602      | -3.37878428  |
| NSDHL    | 0.149418076     | 5.653501009        | 2.759033162  | 0.007243526 | 0.041508586      | -3.378998189 |
| DBR1     | -0.114653977    | 3.651182318        | -2.696366238 | 0.008610531 | 0.04759957       | -3.383447504 |
| SLC35D2  | -0.121257995    | 3.461716936        | -2.693167533 | 0.008686242 | 0.047895151      | -3.385567109 |
| CDK12    | 0.294626051     | 5.773545984        | 2.764065758  | 0.007142855 | 0.041053019      | -3.385886169 |
| ZPR1     | 0.116533882     | 5.169560429        | 2.754478687  | 0.007335751 | 0.041842388      | -3.38715751  |
| SRSF4    | -0.103717623    | 6.023767113        | -2.764449835 | 0.007135224 | 0.041024817      | -3.38724052  |
| VDR      | 0.200415474     | 5.957651041        | 2.767097301  | 0.007082832 | 0.040863951      | -3.388158111 |
| SNRPD3   | 0.099131786     | 5.495004741        | 2.757874955  | 0.007266878 | 0.041543927      | -3.388529285 |
| MEN1     | -0.148575097    | 5.350119782        | -2.754662763 | 0.007332003 | 0.041836851      | -3.391846585 |
| BAG3     | 0.1119846       | 6.595277552        | 2.764632944  | 0.007131589 | 0.041019573      | -3.395393355 |
| ANXA7    | 0.092859839     | 7.115400192        | 2.761792587  | 0.007188167 | 0.041273277      | -3.396392881 |
| ETFRF1   | 0.112561574     | 3.463467338        | 2.686291542  | 0.00885105  | 0.048590459      | -3.39748052  |
| TMEM129  | 0.092808991     | 5.461834079        | 2.755073926  | 0.007323637 | 0.041814987      | -3.399339262 |
| ARAP1    | -0.079484799    | 6.960768604        | -2.756899313 | 0.007286602 | 0.041640885      | -3.408660017 |
| PES1     | 0.103810269     | 6.676033612        | 2.75880042   | 0.007248213 | 0.041508586      | -3.409991502 |
| MIER1    | 0.099323231     | 5.456200614        | 2.749930762  | 0.007428913 | 0.042229867      | -3.413242531 |
| DTD2     | 0.14053312      | 3.513517754        | 2.679789527  | 0.009009509 | 0.04917364       | -3.414275467 |
| TP53RK   | 0.09550906      | 5.001756232        | 2.738866171  | 0.007660102 | 0.043347775      | -3.417320068 |
| GLO1     | 0.06913193      | 7.00223483         | 2.753793175  | 0.007349724 | 0.04189037       | -3.419078473 |
| FAM8A1   | 0.105776155     | 5.909476391        | 2.75058617   | 0.007415421 | 0.042185008      | -3.423175181 |
| LTBP3    | -0.155855276    | 8.657054419        | -2.725939801 | 0.007938508 | 0.044688224      | -3.423931029 |
| DOCK6    | -0.145119681    | 4.03369497         | -2.699111281 | 0.008546037 | 0.047347373      | -3.42653633  |
| LURAP1L  | -0.168294523    | 5.060392173        | -2.731634311 | 0.007814741 | 0.04410688       | -3.428143238 |
| VMP1     | 0.087985375     | 6.495552964        | 2.751125276  | 0.00740434  | 0.042137882      | -3.429120755 |
| APC      | -0.29051296     | 5.028465418        | -2.723353763 | 0.007995303 | 0.044950586      | -3.436092292 |
| BCR      | -0.131673118    | 5.941560264        | -2.743020303 | 0.007572543 | 0.04293293       | -3.440769655 |
| RAB2A    | 0.079253059     | 7.392964502        | 2.742531987  | 0.007582788 | 0.042974839      | -3.440892085 |
| WDR61    | 0.099710118     | 4.359525443        | 2.702013097  | 0.00847834  | 0.047076191      | -3.441100672 |
| ZNF512B  | -0.112057481    | 4.961439968        | -2.72327446  | 0.007997051 | 0.044950586      | -3.44395442  |
| PDCD6IP  | 0.083578481     | 7.247319922        | 2.739426684  | 0.007648234 | 0.04329688       | -3.451163762 |
| KIAA2026 | -0.201478386    | 4.358483464        | -2.694066559 | 0.008664902 | 0.047823047      | -3.45578088  |

| Gene      | Log fold change | Average Expression | t            | P-value     | Adjusted P-value | B            |
|-----------|-----------------|--------------------|--------------|-------------|------------------|--------------|
| PMP22     | 0.081938582     | 8.017996358        | 2.721664875  | 0.008032595 | 0.045116706      | -3.463654189 |
| RAVER1    | -0.130047997    | 4.732799426        | -2.704887663 | 0.00841176  | 0.046805285      | -3.467129161 |
| CALCOCO1  | 0.090815202     | 6.697765744        | 2.734414642  | 0.007754955 | 0.043802266      | -3.469999284 |
| C1GALT1C1 | 0.092675888     | 4.673506536        | 2.702380201  | 0.00846981  | 0.047059744      | -3.472806817 |
| MIER3     | 0.238529134     | 4.136575363        | 2.67818774   | 0.00904894  | 0.04931738       | -3.475519908 |
| CFAP20    | 0.12286183      | 3.981704401        | 2.678398005  | 0.009043755 | 0.04930696       | -3.476328659 |
| POLDIP3   | -0.172776313    | 6.328643382        | -2.731031925 | 0.00782775  | 0.044163755      | -3.477553629 |
| SNX4      | 0.13547832      | 4.15356101         | 2.682196779  | 0.008950544 | 0.048922712      | -3.47766966  |
| ZBTB40    | 0.233233785     | 4.336647058        | 2.677578275  | 0.009063985 | 0.049345814      | -3.481073309 |
| MPC1      | 0.147454878     | 4.310153314        | 2.686024237  | 0.008857514 | 0.04859053       | -3.486228921 |
| ZNF436    | 0.303064238     | 5.941534948        | 2.722312185  | 0.008018283 | 0.04505312       | -3.492610537 |
| FRYL      | -0.313315993    | 4.310723798        | -2.67302382  | 0.009177133 | 0.049831387      | -3.494066363 |
| MYL12A    | 0.10837096      | 7.295952438        | 2.721380298  | 0.008038894 | 0.045135258      | -3.495227052 |
| ICE1      | 0.227594261     | 5.573652395        | 2.714327674  | 0.008196454 | 0.045814984      | -3.496147211 |
| MLXIP     | -0.115342014    | 5.993028657        | -2.718653566 | 0.00809948  | 0.045390836      | -3.50070596  |
| SRSF5     | 0.15363544      | 6.58867383         | 2.719562245  | 0.008079244 | 0.045328017      | -3.504078206 |
| AARS      | -0.088029588    | 8.052486475        | -2.700556935 | 0.00851225  | 0.047186729      | -3.509181932 |
| UBA5      | 0.106476066     | 4.62835296         | 2.685600719  | 0.008867765 | 0.048621428      | -3.51022016  |
| DAB2      | 0.139518484     | 9.017649532        | 2.67778148   | 0.009058966 | 0.049345814      | -3.513079757 |
| ZBED1     | -0.093069943    | 5.862592463        | -2.714419328 | 0.008194388 | 0.045814984      | -3.515058776 |
| CCDC115   | 0.111032349     | 4.772941957        | 2.689688961  | 0.008769266 | 0.048246977      | -3.518587012 |
| TTC7A     | 0.11531821      | 5.419718498        | 2.697058394  | 0.008594227 | 0.047544414      | -3.522236989 |
| PPP1R3C   | -0.25479429     | 5.524912932        | -2.689927504 | 0.00876355  | 0.048233143      | -3.528161031 |
| CRBN      | -0.080793238    | 4.561959212        | -2.680543176 | 0.008991011 | 0.049108262      | -3.528832382 |
| ALPK2     | 0.235233269     | 5.400052428        | 2.6987394    | 0.008554749 | 0.047362301      | -3.533390066 |
| MAX       | -0.062097812    | 5.949285316        | -2.705526751 | 0.008397023 | 0.046745288      | -3.535207686 |
| RIC1      | 0.320066408     | 4.883636568        | 2.684649948  | 0.008890816 | 0.048712525      | -3.535260902 |
| RPS27L    | 0.17835269      | 7.374167856        | 2.702599891  | 0.00846471  | 0.047052541      | -3.535472883 |
| SAMD4B    | -0.156512675    | 7.688249713        | -2.694541557 | 0.008653646 | 0.047785382      | -3.539534063 |
| TMEM237   | 0.090662043     | 4.842308451        | 2.68019993   | 0.008999432 | 0.049136439      | -3.540025122 |
| GATD1     | -0.144789506    | 5.222908309        | -2.68910304  | 0.008783321 | 0.048306664      | -3.541794814 |
| ATP6AP2   | 0.078015938     | 8.003759151        | 2.690854309  | 0.008741372 | 0.048128666      | -3.542422139 |
| BICD2     | -0.153643856    | 5.770441333        | -2.69683892  | 0.008599394 | 0.047555532      | -3.548541798 |
| EI24      | 0.073962118     | 7.140784474        | 2.700485806  | 0.008513909 | 0.047186729      | -3.550755333 |
| GYS1      | -0.077390465    | 5.504048977        | -2.69195938  | 0.008714996 | 0.048018544      | -3.551148797 |
| TWF1      | 0.097175292     | 6.043081477        | 2.698727818  | 0.00855502  | 0.047362301      | -3.553713615 |
| DAXX      | -0.117738162    | 5.834228116        | -2.69594859  | 0.008620382 | 0.047619154      | -3.556947281 |
| CCSER2    | -0.133650631    | 5.722479411        | -2.691155868 | 0.008734167 | 0.04810658       | -3.566004431 |
| EIF2S3    | 0.09581855      | 7.143188284        | 2.693487778  | 0.008678635 | 0.047870728      | -3.566013817 |
| FAM120B   | -0.104147277    | 5.333834922        | -2.682640067 | 0.008939724 | 0.048899057      | -3.572066109 |
| MAEA      | -0.068929701    | 5.621563409        | -2.686089899 | 0.008855926 | 0.04859053       | -3.574955923 |
| PANK3     | 0.206472413     | 5.811925513        | 2.684572843  | 0.008892687 | 0.048712525      | -3.584048032 |
| TMEM98    | 0.080622309     | 7.082873298        | 2.683805027  | 0.008911346 | 0.048782711      | -3.591614995 |
| ADH5      | 0.064864871     | 7.726814883        | 2.672918193  | 0.009179772 | 0.049831387      | -3.599335623 |
| C9orf78   | 0.08221029      | 5.714113873        | 2.676784019  | 0.009083625 | 0.049434872      | -3.599752179 |
| VAMP3     | 0.064602998     | 7.445697395        | 2.674242919  | 0.009146721 | 0.049688497      | -3.606534351 |
| PLXNA3    | -0.115687029    | 5.524921183        | -2.672791119 | 0.009182948 | 0.049831387      | -3.610952096 |
| PRDX1     | 0.119951663     | 7.345007249        | 2.672119332  | 0.009199756 | 0.049888567      | -3.614021037 |
| TRIM22    | 0.085371159     | 6.847950027        | 2.675334942  | 0.009119557 | 0.04957669       | -3.616959306 |
