# Supplementary material for: Comparison of time and dose dependent gene expression and affected pathways in primary human fibroblasts after exposure to ionizing radiation
Source: PubMed Central journal article supplement (PMC7488023; doi:10.1186/s10020-020-00203-0), 2020-09-09
Supplement: 10020_2020_203_MOESM11_ESM.pdf [file 10020_2020_203_MOESM11_ESM.pdf]

**Web Table 1D: Differentially expressed genes 4 hours after exposure to high dose ionizing radiation (2 Gray).**

| <b>Gene</b> | <b>Log fold change</b> | <b>Average Expression</b> | <b>t</b>     | <b>P-value</b> | <b>Adjusted P-value</b> | <b>B</b>    |
|-------------|------------------------|---------------------------|--------------|----------------|-------------------------|-------------|
| CDKN1A      | 1.953793501            | 9.578941307               | 36.51032106  | 2.71E-50       | 4.09E-46                | 102.4322623 |
| PPM1D       | 1.427962733            | 4.428273031               | 30.95634703  | 3.90E-45       | 2.94E-41                | 91.68402178 |
| SESN1       | 1.445791861            | 4.358072382               | 28.57029552  | 1.14E-42       | 5.71E-39                | 86.25366503 |
| PCNA        | 1.150876044            | 5.947349807               | 25.21271253  | 6.74E-39       | 2.54E-35                | 78.01418735 |
| MDM2        | 1.82344373             | 6.788792003               | 24.6550448   | 3.12E-38       | 9.40E-35                | 76.50257123 |
| BLOC1S2     | 0.889099096            | 5.890622378               | 24.1232989   | 1.38E-37       | 3.46E-34                | 75.07085155 |
| PHLDB3      | 1.737078236            | 3.007928833               | 22.79721317  | 6.27E-36       | 1.35E-32                | 70.72137511 |
| FBXO22      | 0.959362261            | 4.733788456               | 22.66734672  | 9.19E-36       | 1.73E-32                | 70.90071167 |
| FAS         | 0.845983693            | 5.41049368                | 22.3688394   | 2.23E-35       | 3.73E-32                | 70.0709961  |
| TIGAR       | 1.244625133            | 4.312602112               | 21.31391687  | 5.48E-34       | 8.26E-31                | 66.84689752 |
| TRIAP1      | 0.882657687            | 4.994139952               | 21.00025981  | 1.45E-33       | 1.99E-30                | 65.95706066 |
| BBC3        | 1.558497276            | 4.023738717               | 20.72275287  | 3.47E-33       | 4.35E-30                | 64.99089778 |
| RAP2B       | 0.846070993            | 6.391043181               | 20.24829163  | 1.57E-32       | 1.81E-29                | 63.65593793 |
| MRPL49      | 0.611788125            | 5.15600004                | 20.19227886  | 1.87E-32       | 2.02E-29                | 63.4618788  |
| HSPA4L      | 1.441938638            | 3.94770276                | 18.8704937   | 1.43E-30       | 1.44E-27                | 59.11577582 |
| MVB12B      | 0.848324525            | 3.617885268               | 18.58651553  | 3.74E-30       | 3.52E-27                | 58.13541085 |
| DCP1B       | 0.757512371            | 4.061718856               | 18.47125955  | 5.53E-30       | 4.90E-27                | 57.82354496 |
| WDR63       | 1.488912077            | 1.76538814                | 16.82307189  | 1.78E-27       | 1.49E-24                | 51.4609755  |
| IER5        | 1.106680548            | 6.031800192               | 16.55304248  | 4.73E-27       | 3.75E-24                | 51.18503266 |
| FDXR        | 0.932735569            | 5.055756172               | 16.48694938  | 6.02E-27       | 4.53E-24                | 50.94173935 |
| PHLDA3      | 0.817741993            | 7.237706873               | 16.45768356  | 6.70E-27       | 4.80E-24                | 50.84025071 |
| BTG2        | 1.883364918            | 4.197394101               | 16.4417977   | 7.10E-27       | 4.86E-24                | 50.76137392 |
| GDF5        | 1.55484675             | 3.56404684                | 16.06066091  | 2.88E-26       | 1.89E-23                | 49.34728675 |
| TRAF4       | 0.930627714            | 4.04860766                | 15.87738543  | 5.68E-26       | 3.57E-23                | 48.68831635 |
| TBC1D22B    | 0.654579926            | 3.409827416               | 15.38907407  | 3.55E-25       | 2.14E-22                | 46.86127286 |
| RRAD        | 2.680726088            | -0.756764208              | 15.23611407  | 6.35E-25       | 3.68E-22                | 43.5066225  |
| KLLN        | 1.477525918            | 0.394399179               | 15.05686391  | 1.26E-24       | 7.02E-22                | 44.70491734 |
| TAP1        | 0.644425774            | 5.266718745               | 14.94385976  | 1.94E-24       | 1.04E-21                | 45.22116399 |
| ARHGAP22    | 0.99644821             | 5.005111097               | 14.89507633  | 2.34E-24       | 1.22E-21                | 45.03570136 |
| ZFPM1       | 1.180873098            | 2.984503149               | 14.84733294  | 2.81E-24       | 1.41E-21                | 44.77736289 |
| RNF19B      | 0.697811177            | 3.164707185               | 14.20797991  | 3.39E-23       | 1.65E-20                | 42.37050257 |
| ARID3A      | 0.917408872            | 3.536743634               | 14.19075157  | 3.63E-23       | 1.71E-20                | 42.31282752 |
| MAST4       | 1.587837998            | 3.351853681               | 14.10045488  | 5.18E-23       | 2.37E-20                | 41.95146115 |
| CDC51       | 0.830499921            | 3.648749669               | 13.48536023  | 6.02E-22       | 2.67E-19                | 39.53942523 |
| CES2        | 0.426925167            | 5.81792216                | 13.18562218  | 2.02E-21       | 8.71E-19                | 38.31592436 |
| SLC52A1     | 2.970636303            | -1.805607518              | 13.1710056   | 2.15E-21       | 8.99E-19                | 34.70561704 |
| NYNRIN      | 1.2099976              | 6.251609185               | 13.13507642  | 2.49E-21       | 1.01E-18                | 38.11218618 |
| ATG4A       | 0.644031487            | 3.19141132                | 12.97452059  | 4.78E-21       | 1.90E-18                | 37.48266752 |
| FBXW7       | 0.875113803            | 3.679572079               | 12.84611106  | 8.10E-21       | 3.13E-18                | 36.96897091 |
| PARD6G      | 0.750369828            | 2.515779141               | 12.81539428  | 9.19E-21       | 3.46E-18                | 36.82229641 |
| POU2F2      | 1.21619882             | 3.80042286                | 12.77200412  | 1.10E-20       | 4.03E-18                | 36.66265236 |
| FHL2        | 0.602049827            | 7.000128448               | 12.37444436  | 5.69E-20       | 2.04E-17                | 34.99918802 |
| BCL2L1      | 0.60244047             | 6.143834118               | 12.36574649  | 5.90E-20       | 2.07E-17                | 34.96390191 |
| CABYR       | 1.047144501            | 1.147853121               | 12.23034408  | 1.04E-19       | 3.55E-17                | 34.23868843 |
| TAF3        | 0.529605445            | 4.130986198               | 12.1904626   | 1.22E-19       | 4.10E-17                | 34.27196245 |
| SCRIB       | 0.412910907            | 5.840180126               | 12.08190798  | 1.93E-19       | 6.32E-17                | 33.78588763 |
| NFY79       | 0.806088342            | 2.889914548               | 12.01685793  | 2.53E-19       | 8.12E-17                | 33.57003996 |
| E2F7        | 1.263110127            | 1.951261267               | 11.82305072  | 5.73E-19       | 1.80E-16                | 32.74320927 |
| PLK3        | 0.892963157            | 4.367813593               | 11.79123037  | 6.56E-19       | 2.02E-16                | 32.61518596 |
| DDB2        | 0.527978005            | 5.250345323               | 11.70506084  | 9.44E-19       | 2.84E-16                | 32.21606484 |
| PGF         | 1.681959225            | 2.786905909               | 11.68070928  | 1.05E-18       | 3.09E-16                | 32.15296731 |
| PACSN3      | 0.997062118            | 4.026428573               | 11.60517407  | 1.44E-18       | 4.15E-16                | 31.83438054 |
| GDF15       | 1.756528508            | 5.277656728               | 11.60233437  | 1.46E-18       | 4.15E-16                | 31.80882123 |
| ETV7        | 1.147064956            | 0.544258867               | 11.53820934  | 1.92E-18       | 5.35E-16                | 31.25222129 |
| COQ8A       | 0.657590576            | 4.316638727               | 11.43693544  | 2.95E-18       | 8.08E-16                | 31.11523559 |
| IKBIP       | 0.280096431            | 6.354412931               | 11.28068826  | 5.75E-18       | 1.55E-15                | 30.40658962 |
| VAV2        | 0.506731634            | 4.729795476               | 11.15220101  | 9.97E-18       | 2.63E-15                | 29.88408825 |
| DAB2        | -0.575426635           | 9.017649532               | -11.10970298 | 1.20E-17       | 3.11E-15                | 29.72125667 |
| SESN2       | 1.257153916            | 5.719769829               | 11.04998318  | 1.55E-17       | 3.95E-15                | 29.43244025 |
| SAC3D1      | 0.712042487            | 3.502055546               | 10.9750202   | 2.14E-17       | 5.36E-15                | 29.17694427 |
| TLCD1       | 0.594589477            | 2.17816021                | 10.94271678  | 2.45E-17       | 5.96E-15                | 29.0648328  |
| TNFRSF10B   | 0.608963965            | 6.324581296               | 10.94350748  | 2.45E-17       | 5.96E-15                | 28.96695656 |
| TNFRSF10D   | 0.932427545            | 4.215595526               | 10.75774788  | 5.46E-17       | 1.30E-14                | 28.2308617  |
| TOB1        | 0.577439563            | 5.784883154               | 10.68996558  | 7.32E-17       | 1.72E-14                | 27.88173793 |
| SAMD4A      | -0.833698966           | 5.653654879               | -10.67694393 | 7.74E-17       | 1.79E-14                | 27.82964609 |
| POLH        | 1.009119625            | 4.858459809               | 10.64938667  | 8.73E-17       | 1.99E-14                | 27.7305078  |
| TLE1        | 0.630412793            | 4.338020448               | 10.63128125  | 9.44E-17       | 2.12E-14                | 27.66828833 |
| MAP2K3      | -0.839298959           | 6.536569544               | -10.53638128 | 1.43E-16       | 3.16E-14                | 27.21555797 |
| THSD1       | 1.051558472            | 3.121218096               | 10.49044208  | 1.74E-16       | 3.80E-14                | 27.12686054 |

| Gene     | Log fold change | Average Expression | t            | P-value  | Adjusted P-value | B           |
|----------|-----------------|--------------------|--------------|----------|------------------|-------------|
| TMEM68   | 0.576149734     | 2.976632077        | 10.47799798  | 1.84E-16 | 3.95E-14         | 27.06959701 |
| AARS2    | 0.582335838     | 3.605816219        | 10.4488398   | 2.09E-16 | 4.43E-14         | 26.91894147 |
| SRSF6    | -0.534530158    | 6.611087388        | -10.39909694 | 2.59E-16 | 5.42E-14         | 26.62442584 |
| MARCKS   | -0.306781435    | 8.796832226        | -10.32457615 | 3.58E-16 | 7.40E-14         | 26.34142384 |
| DNAJB2   | 0.391640175     | 5.873914115        | 10.29513457  | 4.08E-16 | 8.30E-14         | 26.17140556 |
| SDHA     | 0.290623544     | 6.127631499        | 10.27558101  | 4.44E-16 | 8.92E-14         | 26.08440247 |
| KLF4     | 0.464837127     | 6.567953487        | 10.24125217  | 5.16E-16 | 1.02E-13         | 25.93656044 |
| ZNF367   | -1.347765314    | 2.277310962        | -10.08654197 | 1.01E-15 | 1.99E-13         | 25.39982808 |
| FJX1     | -0.653860686    | 3.784608156        | -10.04786978 | 1.20E-15 | 2.32E-13         | 25.19292136 |
| TP53INP1 | 0.852947577     | 5.508580613        | 10.01428838  | 1.39E-15 | 2.66E-13         | 24.95294966 |
| AEN      | 0.810275464     | 4.984272254        | 10.00972957  | 1.42E-15 | 2.68E-13         | 24.96817316 |
| ALPK2    | -0.875185015    | 5.400052428        | -10.0004596  | 1.48E-15 | 2.75E-13         | 24.90544679 |
| PIDD1    | 0.748656132     | 3.527555897        | 9.888252466  | 2.42E-15 | 4.45E-13         | 24.50614748 |
| ANKZF1   | 0.59721447      | 3.044247036        | 9.822714126  | 3.23E-15 | 5.79E-13         | 24.22507997 |
| EHPB1    | -0.407379038    | 6.601495233        | -9.824409688 | 3.21E-15 | 5.79E-13         | 24.11855682 |
| GPC1     | 0.377965438     | 7.649240959        | 9.792859249  | 3.68E-15 | 6.53E-13         | 24.00162722 |
| MRPL39   | 0.553853321     | 3.685957242        | 9.723802077  | 4.99E-15 | 8.74E-13         | 23.77547528 |
| PTPN12   | -0.367377782    | 5.891333803        | -9.677654624 | 6.12E-15 | 1.06E-12         | 23.48527614 |
| THEM6    | 0.500484718     | 3.370717777        | 9.670101905  | 6.32E-15 | 1.08E-12         | 23.56048291 |
| TANK     | -0.357563983    | 4.913049683        | -9.572881249 | 9.71E-15 | 1.64E-12         | 23.06105492 |
| GADD45A  | 1.539106052     | 4.930651997        | 9.497940419  | 1.35E-14 | 2.26E-12         | 22.75426937 |
| VWCE     | 0.820061048     | 4.044055864        | 9.418708572  | 1.92E-14 | 3.17E-12         | 22.41363932 |
| PLXNB2   | 0.348463572     | 8.671728735        | 9.413487852  | 1.96E-14 | 3.18E-12         | 22.37407907 |
| RHOBTB3  | -0.48982568     | 6.8082914          | -9.414398454 | 1.95E-14 | 3.18E-12         | 22.32508008 |
| LRRC42   | -0.310628985    | 5.109243013        | -9.396627143 | 2.11E-14 | 3.39E-12         | 22.26596433 |
| CRIP1    | 0.371039528     | 4.184897106        | 9.361942097  | 2.46E-14 | 3.91E-12         | 22.15899948 |
| PRR16    | -0.375915421    | 4.47269225         | -9.321794627 | 2.94E-14 | 4.62E-12         | 21.9712431  |
| ARHGAP18 | -0.605609406    | 4.711536226        | -9.316802407 | 3.01E-14 | 4.67E-12         | 21.94645195 |
| WHRN     | 0.923805161     | 2.534640824        | 9.269244399  | 3.71E-14 | 5.71E-12         | 21.87562873 |
| CAVIN2   | 1.253276035     | 1.192694398        | 9.25320266   | 3.99E-14 | 6.06E-12         | 21.78740593 |
| HDAC7    | -0.320538112    | 7.246363863        | -9.233499236 | 4.35E-14 | 6.55E-12         | 21.5368213  |
| PTP4A1   | 0.449316335     | 7.322408638        | 9.15485271   | 6.16E-14 | 9.19E-12         | 21.19385325 |
| SLC9A3R1 | 0.404073182     | 3.912537081        | 9.139201101  | 6.60E-14 | 9.75E-12         | 21.19748646 |
| SH2D4A   | -0.532204075    | 5.219020967        | -9.107342511 | 7.60E-14 | 1.11E-11         | 21.00658059 |
| PELI3    | 0.437484888     | 4.250853172        | 9.101453798  | 7.80E-14 | 1.13E-11         | 21.00593313 |
| SLC12A4  | 0.293242376     | 6.265771077        | 9.088022986  | 8.28E-14 | 1.19E-11         | 20.88897157 |
| PLK2     | 0.741965372     | 4.854332864        | 9.03915598   | 1.03E-13 | 1.46E-11         | 20.69485829 |
| NUMBL    | -0.455882107    | 6.275816428        | -9.015639977 | 1.14E-13 | 1.61E-11         | 20.57072831 |
| MSH6     | -0.423200495    | 5.917154835        | -8.971741289 | 1.39E-13 | 1.93E-11         | 20.37950681 |
| FERMT2   | -0.568726734    | 7.023179374        | -8.906315885 | 1.85E-13 | 2.56E-11         | 20.09351522 |
| SRGAP3   | 0.898135145     | 1.593080831        | 8.87152537   | 2.16E-13 | 2.96E-11         | 20.1528751  |
| POU3F1   | 2.979171195     | -3.664674794       | 8.864353418  | 2.23E-13 | 3.03E-11         | 17.72441859 |
| EDA2R    | 0.479112814     | 4.690613368        | 8.784033341  | 3.19E-13 | 4.29E-11         | 19.60020409 |
| CEP164   | 0.349358451     | 4.464904601        | 8.774004087  | 3.33E-13 | 4.44E-11         | 19.56132875 |
| PER2     | -0.701767266    | 3.070457678        | -8.771189827 | 3.37E-13 | 4.46E-11         | 19.70168477 |
| TMEM97   | 0.679803375     | 5.282706806        | 8.760539019  | 3.54E-13 | 4.63E-11         | 19.45550387 |
| CPSF4    | 0.536115973     | 4.182432959        | 8.748237493  | 3.74E-13 | 4.85E-11         | 19.46300437 |
| ANKRA2   | 0.652456389     | 2.486144544        | 8.739080885  | 3.89E-13 | 4.97E-11         | 19.57277968 |
| NINJ1    | 0.587444743     | 4.814540268        | 8.74058495   | 3.86E-13 | 4.97E-11         | 19.3984702  |
| PRIMPOL  | -0.582394668    | 2.844398578        | -8.736615918 | 3.93E-13 | 4.98E-11         | 19.55340841 |
| MAMLD1   | -0.474583879    | 5.282641386        | -8.700128763 | 4.62E-13 | 5.80E-11         | 19.20164062 |
| PLCD1    | 0.413779193     | 5.186049927        | 8.604694913  | 7.06E-13 | 8.79E-11         | 18.78123913 |
| RANBP9   | -0.317783438    | 6.11643876         | -8.569250447 | 8.27E-13 | 1.02E-10         | 18.60973633 |
| RHBDF2   | 0.590384693     | 2.078017259        | 8.537637933  | 9.51E-13 | 1.16E-10         | 18.69771146 |
| DCLRE1B  | -0.480845159    | 3.266535632        | -8.516028783 | 1.05E-12 | 1.27E-10         | 18.50685889 |
| PPP1R10  | 0.565924311     | 5.684207763        | 8.463638041  | 1.32E-12 | 1.59E-10         | 18.14647629 |
| SLC7A8   | 0.37298096      | 6.687456896        | 8.460003173  | 1.34E-12 | 1.60E-10         | 18.12492651 |
| ST8SIA1  | 1.208959613     | 2.383663175        | 8.44869962   | 1.41E-12 | 1.67E-10         | 18.31207819 |
| TRIM3    | 0.399557012     | 3.978655486        | 8.431136993  | 1.53E-12 | 1.80E-10         | 18.07922017 |
| HIP1R    | 0.472516275     | 3.429358216        | 8.427542189  | 1.55E-12 | 1.81E-10         | 18.11509577 |
| STXBP3   | 0.34512949      | 4.643779594        | 8.396185931  | 1.78E-12 | 2.06E-10         | 17.89478615 |
| NECAB3   | 0.494858755     | 3.046172099        | 8.393015308  | 1.81E-12 | 2.08E-10         | 18.0147175  |
| KCNK2    | -0.287077781    | 8.205197416        | -8.304305213 | 2.68E-12 | 3.06E-10         | 17.4727276  |
| GAS2L3   | -0.875908925    | 3.350529159        | -8.258855506 | 3.28E-12 | 3.71E-10         | 17.37160231 |
| PIAS3    | 0.288931927     | 5.014677333        | 8.253011486  | 3.36E-12 | 3.78E-10         | 17.23851352 |
| MIR22HG  | -0.628997217    | 4.512902585        | -8.237416151 | 3.60E-12 | 4.02E-10         | 17.22990989 |
| PRKCE    | 0.672761133     | 4.232242803        | 8.194490336  | 4.36E-12 | 4.83E-10         | 17.0417336  |
| TCOF1    | 0.301780613     | 5.330968238        | 8.192511908  | 4.40E-12 | 4.83E-10         | 16.96292853 |
| RBM14    | 0.272460944     | 4.741305263        | 8.18359929   | 4.57E-12 | 4.99E-10         | 16.9523561  |
| SLC10A3  | 0.267700659     | 5.656145013        | 8.160928589  | 5.06E-12 | 5.48E-10         | 16.81456042 |

| Gene      | Log fold change | Average Expression | t            | P-value  | Adjusted P-value | B           |
|-----------|-----------------|--------------------|--------------|----------|------------------|-------------|
| UHRF1     | -1.016905722    | 1.683118784        | -8.153838397 | 5.22E-12 | 5.62E-10         | 17.0587482  |
| SH2B3     | -0.578060517    | 5.366836049        | -8.149355186 | 5.32E-12 | 5.69E-10         | 16.77399488 |
| SERPINB8  | -0.514102955    | 4.746140507        | -8.140898828 | 5.53E-12 | 5.86E-10         | 16.76336737 |
| TSKU      | 0.363010871     | 6.163184052        | 8.134925129  | 5.68E-12 | 5.98E-10         | 16.69371994 |
| FGF5      | -0.769886951    | 5.634833103        | -8.128418233 | 5.84E-12 | 6.11E-10         | 16.69910972 |
| PRDM1     | 0.633742812     | 2.905438371        | 8.120798731  | 6.04E-12 | 6.28E-10         | 16.77566248 |
| GEMIN4    | -0.368451364    | 4.971088831        | -8.11669981  | 6.15E-12 | 6.35E-10         | 16.64898882 |
| ABHD17C   | -0.542523604    | 4.770395607        | -8.09401204  | 6.80E-12 | 6.97E-10         | 16.57582729 |
| PPRC1     | -0.449839884    | 5.959866947        | -8.076210845 | 7.36E-12 | 7.49E-10         | 16.44987885 |
| XPC       | 0.445663389     | 5.488166694        | 8.057685135  | 7.99E-12 | 8.08E-10         | 16.36701276 |
| TMEM217   | 1.000669273     | 0.558342338        | 8.053864958  | 8.13E-12 | 8.16E-10         | 16.60791482 |
| CCDC112   | -0.571670082    | 2.439224781        | -8.044960766 | 8.46E-12 | 8.44E-10         | 16.53394401 |
| PPME1     | 0.28579101      | 5.100861017        | 8.011504506  | 9.81E-12 | 9.72E-10         | 16.1733723  |
| ZMAT3     | 0.415596861     | 7.3940892          | 7.982052475  | 1.12E-11 | 1.10E-09         | 16.03985779 |
| SPG20     | -0.206070447    | 7.214586345        | -7.978969016 | 1.13E-11 | 1.11E-09         | 16.01558849 |
| CDV3      | -0.372220785    | 7.585817109        | -7.967205157 | 1.19E-11 | 1.16E-09         | 15.97368679 |
| RNF24     | -0.459528077    | 6.04313865         | -7.965060723 | 1.20E-11 | 1.16E-09         | 15.95009414 |
| NCKIPSD   | 0.376442478     | 3.784186763        | 7.919661955  | 1.47E-11 | 1.41E-09         | 15.86449306 |
| METTL13   | 0.305118515     | 5.27074638         | 7.918549009  | 1.48E-11 | 1.41E-09         | 15.76040682 |
| DUSP3     | -0.298300832    | 6.272464369        | -7.916078293 | 1.50E-11 | 1.42E-09         | 15.73368915 |
| RPAP1     | 0.361803832     | 4.342937164        | 7.898396004  | 1.62E-11 | 1.52E-09         | 15.7164818  |
| CGRRF1    | 0.271533208     | 3.547801621        | 7.884750384  | 1.72E-11 | 1.61E-09         | 15.73855968 |
| SLC20A1   | -0.976887898    | 7.015763557        | -7.861710485 | 1.90E-11 | 1.77E-09         | 15.50235321 |
| PPP4R3A   | 0.33034728      | 5.297316175        | 7.857405504  | 1.94E-11 | 1.79E-09         | 15.48986057 |
| GBP1      | -0.752817136    | 4.986768263        | -7.855835877 | 1.95E-11 | 1.79E-09         | 15.53015141 |
| POLR3H    | -0.213458594    | 5.952206543        | -7.848172085 | 2.02E-11 | 1.84E-09         | 15.43729213 |
| TAB1      | 0.374074259     | 4.765249553        | 7.84312554   | 2.07E-11 | 1.88E-09         | 15.4632576  |
| TEF       | -0.454648186    | 4.751686708        | -7.832756279 | 2.16E-11 | 1.95E-09         | 15.42834817 |
| HDAC9     | -0.64905108     | 2.93685236         | -7.828442338 | 2.20E-11 | 1.98E-09         | 15.53038678 |
| MORC4     | 0.239827326     | 5.480581671        | 7.810963393  | 2.38E-11 | 2.12E-09         | 15.28303148 |
| DNAJA1    | 0.261107705     | 7.482722506        | 7.803730375  | 2.46E-11 | 2.18E-09         | 15.26332749 |
| TMEM92    | 1.081970778     | -0.759268617       | 7.800734284  | 2.49E-11 | 2.20E-09         | 15.43850246 |
| RAB11FIP5 | -0.332750178    | 6.612689139        | -7.755642083 | 3.04E-11 | 2.66E-09         | 15.03133553 |
| PTX3      | -0.613193094    | 8.997051295        | -7.748151478 | 3.14E-11 | 2.74E-09         | 15.05554227 |
| STK11     | 0.312683884     | 5.810760581        | 7.745201836  | 3.19E-11 | 2.75E-09         | 14.99121333 |
| MGRN1     | 0.210381412     | 6.273007404        | 7.744222747  | 3.20E-11 | 2.75E-09         | 14.98039463 |
| SPRED1    | -0.548927394    | 6.028243405        | -7.742493573 | 3.22E-11 | 2.76E-09         | 14.98116956 |
| OSBPL3    | 0.601621578     | 5.779485899        | 7.726999916  | 3.45E-11 | 2.94E-09         | 14.90975657 |
| RNF138    | -0.39693379     | 3.544573481        | -7.725172216 | 3.48E-11 | 2.95E-09         | 15.05851216 |
| SP2       | -0.316326993    | 4.278478648        | -7.714431039 | 3.65E-11 | 3.07E-09         | 14.95266943 |
| CASP10    | 0.609867367     | 2.302150551        | 7.696149543  | 3.96E-11 | 3.31E-09         | 15.03817241 |
| EHD4      | -0.446753853    | 5.474408355        | -7.693640287 | 4.00E-11 | 3.33E-09         | 14.77757087 |
| PRKCD     | 0.385229224     | 3.383479729        | 7.673417463  | 4.37E-11 | 3.62E-09         | 14.79091843 |
| NEK11     | -0.366830918    | 3.942748173        | -7.655818545 | 4.73E-11 | 3.89E-09         | 14.71822944 |
| JOSD1     | -0.29967707     | 6.21433537         | -7.639697035 | 5.08E-11 | 4.16E-09         | 14.52607339 |
| REEP4     | 0.457836507     | 3.368425212        | 7.630998666  | 5.27E-11 | 4.29E-09         | 14.61226036 |
| IFIH1     | 0.504918114     | 3.826447532        | 7.593472429  | 6.22E-11 | 5.01E-09         | 14.42968956 |
| DDX5      | -0.541876947    | 8.4589716          | -7.593579205 | 6.22E-11 | 5.01E-09         | 14.36507678 |
| IL4R      | -0.316395634    | 5.491598057        | -7.581386397 | 6.56E-11 | 5.26E-09         | 14.28366301 |
| VAPA      | -0.183884155    | 6.910609197        | -7.578495634 | 6.65E-11 | 5.30E-09         | 14.26012729 |
| GDNF      | 0.799753729     | 2.514593446        | 7.570166464  | 6.90E-11 | 5.45E-09         | 14.49372621 |
| GRB10     | 0.402328461     | 5.118165129        | 7.569803057  | 6.91E-11 | 5.45E-09         | 14.24311027 |
| KIF23     | -0.656385587    | 3.037464213        | -7.561971788 | 7.15E-11 | 5.59E-09         | 14.40651318 |
| SLC7A1    | -0.699369596    | 6.361562501        | -7.561524745 | 7.16E-11 | 5.59E-09         | 14.18834566 |
| TAOK3     | -0.313367271    | 5.237977076        | -7.536531971 | 8.00E-11 | 6.21E-09         | 14.09628691 |
| DNAAF2    | -0.343632164    | 3.127355714        | -7.513819525 | 8.84E-11 | 6.79E-09         | 14.1408785  |
| BCL2      | -0.611835781    | 3.944966011        | -7.514692394 | 8.81E-11 | 6.79E-09         | 14.11109974 |
| VDR       | -0.552329494    | 5.957651041        | -7.511047569 | 8.95E-11 | 6.84E-09         | 13.9749402  |
| CHML      | -0.603587101    | 3.373068988        | -7.482534277 | 1.01E-10 | 7.72E-09         | 14.01212849 |
| HIST1H2BG | 1.613753925     | -1.692329728       | 7.481370582  | 1.02E-10 | 7.72E-09         | 13.78462932 |
| RIMKLB    | -0.477447488    | 3.552132045        | -7.476906147 | 1.04E-10 | 7.83E-09         | 13.95423159 |
| ZBTB24    | -0.470319921    | 3.745653668        | -7.471836274 | 1.06E-10 | 7.97E-09         | 13.9139282  |
| DKK1      | 0.664432364     | 7.22443257         | 7.470505435  | 1.07E-10 | 7.98E-09         | 13.79135361 |
| TNFRSF10A | 0.992415079     | 0.916942112        | 7.467887653  | 1.08E-10 | 8.03E-09         | 14.12664352 |
| C1orf198  | -0.472773117    | 6.987827441        | -7.459425977 | 1.12E-10 | 8.29E-09         | 13.74460151 |
| ARHGEF3   | 0.460068937     | 5.481086069        | 7.444107697  | 1.20E-10 | 8.83E-09         | 13.69662492 |
| ORA13     | 0.501833956     | 3.935113285        | 7.429473979  | 1.28E-10 | 9.37E-09         | 13.70938167 |
| SMAD3     | -0.369290749    | 7.130400699        | -7.379067799 | 1.60E-10 | 1.16E-08         | 13.40046683 |
| DCAF4     | -0.513489107    | 4.122673375        | -7.340495067 | 1.89E-10 | 1.37E-08         | 13.29390863 |
| NAT6      | 0.506801158     | 2.422255849        | 7.338243262  | 1.91E-10 | 1.38E-08         | 13.45814062 |

| Gene      | Log fold change | Average Expression | t            | P-value  | Adjusted P-value | B           |
|-----------|-----------------|--------------------|--------------|----------|------------------|-------------|
| MTA3      | 0.195810527     | 4.715769842        | 7.3160717    | 2.11E-10 | 1.51E-08         | 13.17390718 |
| DEPDC7    | 0.678406128     | 1.905784148        | 7.291883639  | 2.34E-10 | 1.67E-08         | 13.331928   |
| TNFRSF1B  | -0.682123025    | 4.680945544        | -7.291360191 | 2.35E-10 | 1.67E-08         | 13.04169394 |
| ARHGAP11A | -0.479047973    | 3.423041714        | -7.272965422 | 2.55E-10 | 1.80E-08         | 13.07788521 |
| H1FO      | -0.230086295    | 6.564068945        | -7.254036626 | 2.77E-10 | 1.95E-08         | 12.84639846 |
| UQCC1     | 0.281997696     | 4.565094582        | 7.251837784  | 2.79E-10 | 1.96E-08         | 12.89911374 |
| SUOX      | 0.30896563      | 3.940767992        | 7.23887861   | 2.96E-10 | 2.06E-08         | 12.91126527 |
| SEMA6C    | 0.457173943     | 3.207102384        | 7.236886615  | 2.98E-10 | 2.07E-08         | 12.97035705 |
| AMD1      | -0.53545204     | 5.714381529        | -7.212160478 | 3.32E-10 | 2.30E-08         | 12.67220249 |
| PRR7      | 0.644307361     | 1.309576208        | 7.206347327  | 3.41E-10 | 2.35E-08         | 12.99706604 |
| ADA       | 0.594813666     | 4.774683029        | 7.203225929  | 3.46E-10 | 2.37E-08         | 12.67218556 |
| KLHL42    | -0.428119001    | 4.488815774        | -7.200163488 | 3.50E-10 | 2.39E-08         | 12.68399649 |
| UBC       | 0.302483308     | 9.345611817        | 7.196173084  | 3.57E-10 | 2.41E-08         | 12.6913372  |
| NEXN      | -0.486950738    | 5.229750969        | -7.196923935 | 3.55E-10 | 2.41E-08         | 12.62656373 |
| DTL       | -0.838817839    | 2.637869346        | -7.191011932 | 3.65E-10 | 2.44E-08         | 12.85421112 |
| TRAF5     | -0.470947264    | 3.504169606        | -7.192024313 | 3.63E-10 | 2.44E-08         | 12.73386204 |
| ATF1      | -0.241472151    | 4.947189102        | -7.189098355 | 3.68E-10 | 2.45E-08         | 12.60502775 |
| BCOR      | -0.778815319    | 4.543805943        | -7.171643412 | 3.97E-10 | 2.63E-08         | 12.54163678 |
| ACER2     | 1.655589261     | -1.493927051       | 7.165252181  | 4.08E-10 | 2.70E-08         | 12.68326963 |
| TNFRSF10C | 0.641710341     | 1.422892158        | 7.163969422  | 4.10E-10 | 2.70E-08         | 12.79463059 |
| EVC2      | 0.282758315     | 4.110388829        | 7.151123711  | 4.34E-10 | 2.83E-08         | 12.48030838 |
| CEP250    | 0.288406794     | 5.430074012        | 7.151799032  | 4.33E-10 | 2.83E-08         | 12.4173889  |
| ING5      | -0.418790414    | 2.91927999         | -7.148081282 | 4.40E-10 | 2.86E-08         | 12.60033976 |
| HSPA1B    | 0.463045877     | 4.993090733        | 7.146208394  | 4.44E-10 | 2.87E-08         | 12.40724158 |
| ZBTB14    | -0.288777374    | 3.540121875        | -7.141700256 | 4.52E-10 | 2.91E-08         | 12.4910275  |
| NR4A3     | -0.827266278    | 5.204685634        | -7.139690835 | 4.56E-10 | 2.93E-08         | 12.44009741 |
| EI24      | 0.197085016     | 7.140784474        | 7.133403795  | 4.69E-10 | 2.99E-08         | 12.33559946 |
| ATP8B1    | -0.730460573    | 5.899632055        | -7.122207566 | 4.93E-10 | 3.13E-08         | 12.27826445 |
| KCNJ2     | 0.90992733      | 2.402750033        | 7.12027239   | 4.97E-10 | 3.14E-08         | 12.54095144 |
| LIMS1     | -0.370206236    | 6.51713682         | -7.114350627 | 5.10E-10 | 3.21E-08         | 12.24341955 |
| PHLPP2    | -0.66886918     | 3.846106915        | -7.111912168 | 5.15E-10 | 3.23E-08         | 12.36867216 |
| TRIM24    | -0.394136813    | 4.159617874        | -7.111423209 | 5.16E-10 | 3.23E-08         | 12.31396544 |
| RBMS1     | -0.312019423    | 6.997915219        | -7.109826797 | 5.20E-10 | 3.24E-08         | 12.22379367 |
| RNF115    | -0.22301324     | 6.04159249         | -7.106629932 | 5.27E-10 | 3.27E-08         | 12.21146828 |
| TCAIM     | 0.307496102     | 3.897876906        | 7.102396673  | 5.37E-10 | 3.32E-08         | 12.31857014 |
| YPEL4     | 0.81497317      | 0.818629285        | 7.09850874   | 5.46E-10 | 3.36E-08         | 12.56187512 |
| TMEM201   | -0.324430706    | 3.877551585        | -7.091561678 | 5.63E-10 | 3.45E-08         | 12.26617856 |
| TMEM138   | 0.41953861      | 4.645657487        | 7.089864272  | 5.67E-10 | 3.46E-08         | 12.19663386 |
| TOX       | -0.944256568    | 1.658053922        | -7.0859019   | 5.77E-10 | 3.51E-08         | 12.49443804 |
| PIM1      | 0.862173925     | 3.858871985        | 7.080515916  | 5.91E-10 | 3.57E-08         | 12.20165024 |
| SRSF5     | -0.398985387    | 6.58867383         | -7.080128954 | 5.92E-10 | 3.57E-08         | 12.0963663  |
| FGF2      | 0.410270851     | 5.899448548        | 7.071570544  | 6.15E-10 | 3.69E-08         | 12.07351124 |
| NAV3      | -0.67930984     | 4.020636292        | -7.068063446 | 6.24E-10 | 3.73E-08         | 12.15084419 |
| TUBGCP6   | -0.332767595    | 4.273233729        | -7.042822781 | 6.97E-10 | 4.15E-08         | 12.03870256 |
| C1orf216  | -0.263085616    | 5.463367394        | -7.029507359 | 7.38E-10 | 4.38E-08         | 11.89051897 |
| BLCAP     | 0.199542803     | 5.677898487        | 7.019412689  | 7.72E-10 | 4.56E-08         | 11.84089144 |
| RBM12     | -0.391454053    | 6.456127925        | -7.005865827 | 8.18E-10 | 4.82E-08         | 11.77540355 |
| DBF4      | -0.492561533    | 2.703949132        | -6.998681831 | 8.45E-10 | 4.95E-08         | 11.97349478 |
| RALGDS    | 0.300231273     | 5.311682924        | 6.985099465  | 8.96E-10 | 5.23E-08         | 11.70418546 |
| RCC2      | 0.385062363     | 5.656850944        | 6.980162457  | 9.15E-10 | 5.32E-08         | 11.66898709 |
| SRP68     | 0.167289045     | 6.383594122        | 6.971800527  | 9.49E-10 | 5.50E-08         | 11.62851274 |
| CDC25A    | -0.755528489    | 0.880466049        | -6.956603725 | 1.01E-09 | 5.83E-08         | 11.96987169 |
| GSE1      | -0.352102375    | 5.83869265         | -6.956849211 | 1.01E-09 | 5.83E-08         | 11.56900797 |
| UAP1      | -0.452669761    | 6.85163187         | -6.955718763 | 1.02E-09 | 5.83E-08         | 11.5648272  |
| WBP4      | -0.274969048    | 3.816927692        | -6.913295423 | 1.22E-09 | 6.95E-08         | 11.52576293 |
| RALGPS2   | -0.529471752    | 5.476268076        | -6.912699553 | 1.23E-09 | 6.95E-08         | 11.39146515 |
| ZNF219    | 0.3005807       | 6.050325957        | 6.91347052   | 1.22E-09 | 6.95E-08         | 11.3804329  |
| FAM212B   | 0.792856286     | 2.843669715        | 6.899242611  | 1.30E-09 | 7.34E-08         | 11.51466204 |
| EED       | 0.282303037     | 3.678165261        | 6.896218703  | 1.32E-09 | 7.41E-08         | 11.42369497 |
| LMNA      | 0.264717757     | 10.63727751        | 6.892815712  | 1.34E-09 | 7.49E-08         | 11.45399641 |
| CSPG4     | 0.612371743     | 5.96447642         | 6.891035441  | 1.35E-09 | 7.53E-08         | 11.28445513 |
| NIP7      | -0.301224423    | 5.116719747        | -6.880821172 | 1.41E-09 | 7.84E-08         | 11.27649859 |
| TMEM63B   | 0.341877889     | 4.487301324        | 6.869224233  | 1.48E-09 | 8.21E-08         | 11.25841103 |
| FAM43A    | 0.67024404      | 4.466314543        | 6.864604206  | 1.51E-09 | 8.35E-08         | 11.24505453 |
| ZNF37A    | 0.290674999     | 4.646957081        | 6.863754495  | 1.52E-09 | 8.35E-08         | 11.21717071 |
| PIM2      | 0.582920753     | 0.23449648         | 6.85283196   | 1.59E-09 | 8.71E-08         | 11.53834361 |
| BMP2      | 0.97433606      | 3.11209234         | 6.852148444  | 1.60E-09 | 8.71E-08         | 11.29594983 |
| CABLES1   | -0.394150981    | 5.350006316        | -6.842921215 | 1.66E-09 | 9.04E-08         | 11.11071939 |
| SPRED2    | -0.365777579    | 5.967506875        | -6.83935189  | 1.69E-09 | 9.15E-08         | 11.07118616 |
| LRRTM2    | 1.095754006     | -0.032077673       | 6.829927748  | 1.76E-09 | 9.47E-08         | 11.44092809 |

| Gene      | Log fold change | Average Expression | t            | P-value  | Adjusted P-value | B           |
|-----------|-----------------|--------------------|--------------|----------|------------------|-------------|
| KBTBD11   | -0.670497387    | 3.327482149        | -6.829776915 | 1.76E-09 | 9.47E-08         | 11.23311042 |
| DGKI      | -0.678312153    | 4.003025498        | -6.82767055  | 1.78E-09 | 9.52E-08         | 11.13287792 |
| NUDT18    | 0.416203393     | 3.070249745        | 6.80500843   | 1.96E-09 | 1.04E-07         | 11.10632568 |
| PNO1      | -0.327370836    | 4.119826183        | -6.804693836 | 1.96E-09 | 1.04E-07         | 11.01059329 |
| RUSC1     | 0.284865286     | 5.049675164        | 6.792014166  | 2.07E-09 | 1.10E-07         | 10.891931   |
| PHC2      | -0.313819953    | 6.700155936        | -6.790508909 | 2.09E-09 | 1.10E-07         | 10.85191441 |
| ARNT2     | -0.577058734    | 4.590755291        | -6.784434476 | 2.14E-09 | 1.13E-07         | 10.89563619 |
| ZNF385A   | 0.546961424     | 5.010030805        | 6.774448618  | 2.24E-09 | 1.17E-07         | 10.81899678 |
| DZIP3     | -0.492368906    | 3.499124157        | -6.770094306 | 2.28E-09 | 1.19E-07         | 10.95483106 |
| UBTD2     | -0.256294871    | 6.235896702        | -6.755102298 | 2.43E-09 | 1.27E-07         | 10.70033094 |
| ZBTB44    | -0.243432834    | 5.6187454          | -6.746826924 | 2.52E-09 | 1.31E-07         | 10.67881575 |
| NADSYN1   | 0.317760332     | 5.623903738        | 6.746214409  | 2.53E-09 | 1.31E-07         | 10.673186   |
| EFCAB7    | 0.563711534     | 2.478421091        | 6.743692337  | 2.55E-09 | 1.31E-07         | 10.95070518 |
| AAED1     | -0.337495245    | 4.805347277        | -6.743418398 | 2.56E-09 | 1.31E-07         | 10.71133603 |
| DHX35     | -0.291672489    | 2.581461466        | -6.74161708  | 2.58E-09 | 1.32E-07         | 10.90987906 |
| SGPL1     | -0.357605693    | 4.820410557        | -6.729664779 | 2.71E-09 | 1.39E-07         | 10.64251111 |
| CMBL      | 0.292485811     | 5.822838897        | 6.725612151  | 2.76E-09 | 1.41E-07         | 10.58374188 |
| EIF4A3    | 0.255151027     | 6.169900897        | 6.720193453  | 2.83E-09 | 1.43E-07         | 10.55180973 |
| DEDD2     | 0.385970215     | 4.046853599        | 6.703806808  | 3.03E-09 | 1.53E-07         | 10.55150466 |
| HIST1H2BD | 0.554251899     | 2.61383852         | 6.699322346  | 3.09E-09 | 1.56E-07         | 10.73171695 |
| HSPA1L    | 0.711748299     | 1.072949412        | 6.688865785  | 3.24E-09 | 1.63E-07         | 10.83528554 |
| CSTF3     | 0.39173041      | 3.755146628        | 6.668465932  | 3.53E-09 | 1.77E-07         | 10.46100979 |
| LIMD1     | -0.510092233    | 3.674017102        | -6.661001994 | 3.65E-09 | 1.81E-07         | 10.40807299 |
| UCK2      | -0.440787823    | 5.05915692         | -6.661251202 | 3.65E-09 | 1.81E-07         | 10.33195814 |
| BICC1     | -0.437953114    | 7.71604122         | -6.658555714 | 3.69E-09 | 1.83E-07         | 10.31187577 |
| PGBD2     | 0.445911905     | 1.739586415        | 6.657203048  | 3.71E-09 | 1.83E-07         | 10.64159429 |
| TMEM120B  | 0.474253994     | 2.675703675        | 6.635716478  | 4.07E-09 | 2.00E-07         | 10.43055394 |
| IRF2BP2   | 0.282185886     | 6.155245929        | 6.624473765  | 4.27E-09 | 2.10E-07         | 10.14575343 |
| SRGAP1    | -0.591858417    | 6.088752548        | -6.613977675 | 4.47E-09 | 2.19E-07         | 10.10221336 |
| TBCK      | -0.233066064    | 5.332314816        | -6.610501829 | 4.54E-09 | 2.21E-07         | 10.11113823 |
| DCUN1D3   | 0.49186622      | 4.725073927        | 6.604592252  | 4.65E-09 | 2.26E-07         | 10.15072814 |
| RAF1      | -0.210616079    | 6.259120627        | -6.601185166 | 4.72E-09 | 2.29E-07         | 10.04639451 |
| KCTD10    | -0.300147237    | 6.771134448        | -6.600112111 | 4.74E-09 | 2.29E-07         | 10.04140571 |
| C4orf46   | -0.396209271    | 3.356308403        | -6.59175988  | 4.92E-09 | 2.37E-07         | 10.19569511 |
| GMPPB     | 0.270948527     | 4.103838916        | 6.589754194  | 4.96E-09 | 2.38E-07         | 10.08864397 |
| CXXC5     | -0.351073483    | 6.988256951        | -6.572899944 | 5.33E-09 | 2.55E-07         | 9.947885599 |
| SLC7A11   | -0.692023748    | 4.790378446        | -6.544389953 | 6.03E-09 | 2.87E-07         | 9.864009075 |
| TYMS      | 0.433988538     | 4.179192654        | 6.516684428  | 6.79E-09 | 3.23E-07         | 9.778162368 |
| ANKLE2    | -0.242299659    | 5.652825807        | -6.512211145 | 6.92E-09 | 3.28E-07         | 9.67611225  |
| LIN7A     | 0.557404879     | 2.275825574        | 6.507897635  | 7.05E-09 | 3.33E-07         | 9.970522124 |
| KRCC1     | 0.363310604     | 4.695084235        | 6.503806811  | 7.17E-09 | 3.38E-07         | 9.68350237  |
| HDAC11    | 0.307485368     | 3.684941353        | 6.494083132  | 7.48E-09 | 3.51E-07         | 9.735598802 |
| SLC27A4   | 0.252042792     | 5.433798151        | 6.486123409  | 7.74E-09 | 3.62E-07         | 9.57329015  |
| FAM111B   | -0.882115459    | 1.939021424        | -6.482918272 | 7.85E-09 | 3.65E-07         | 9.931354953 |
| LIG1      | 0.374741149     | 3.593740631        | 6.482979267  | 7.84E-09 | 3.65E-07         | 9.683761128 |
| ELFN2     | 0.703188867     | 0.946021658        | 6.482069867  | 7.87E-09 | 3.65E-07         | 9.948531655 |
| HS3ST3B1  | -0.368135176    | 5.373013503        | -6.47774773  | 8.02E-09 | 3.71E-07         | 9.554979114 |
| CNOT2     | -0.222949614    | 5.741944057        | -6.47134639  | 8.24E-09 | 3.80E-07         | 9.506589527 |
| ZNF423    | 0.500686597     | 3.247743785        | 6.468690419  | 8.34E-09 | 3.83E-07         | 9.681661988 |
| VIPAS39   | 0.355708254     | 4.662199395        | 6.466649548  | 8.41E-09 | 3.85E-07         | 9.528735313 |
| LSM14A    | -0.1605731      | 6.600632423        | -6.465302148 | 8.46E-09 | 3.86E-07         | 9.471939226 |
| KCTD1     | 0.327784658     | 2.988684013        | 6.463285028  | 8.53E-09 | 3.88E-07         | 9.661841503 |
| BEND3     | -0.59951053     | 2.673363191        | -6.448987435 | 9.07E-09 | 4.12E-07         | 9.631100428 |
| PRKX      | 0.46319199      | 2.786967248        | 6.446192743  | 9.18E-09 | 4.14E-07         | 9.584222139 |
| TBL3      | 0.276352153     | 5.362563944        | 6.445971889  | 9.19E-09 | 4.14E-07         | 9.407399505 |
| RGS16     | 0.826448184     | 2.076997515        | 6.443749557  | 9.28E-09 | 4.17E-07         | 9.773515484 |
| SMURF2    | -0.501831985    | 5.204137854        | -6.433712383 | 9.68E-09 | 4.34E-07         | 9.385567056 |
| TNFSF10   | 0.620755144     | 2.985993647        | 6.428631643  | 9.90E-09 | 4.42E-07         | 9.573160156 |
| LMO7      | -0.386865973    | 6.946652049        | -6.425971994 | 1.00E-08 | 4.46E-07         | 9.32009968  |
| ABCB9     | 0.635281331     | 1.747649787        | 6.421914899  | 1.02E-08 | 4.52E-07         | 9.624683235 |
| TXNIP     | -0.670159722    | 7.24926452         | -6.421780005 | 1.02E-08 | 4.52E-07         | 9.338700112 |
| SYDE1     | -0.25750336     | 6.323239854        | -6.414332831 | 1.05E-08 | 4.65E-07         | 9.259251004 |
| SDHAF4    | 0.485403419     | 1.40331821         | 6.410781311  | 1.07E-08 | 4.71E-07         | 9.657634126 |
| PITPNB    | -0.288717914    | 5.925321791        | -6.409303104 | 1.07E-08 | 4.72E-07         | 9.240087378 |
| MSL1      | -0.290763589    | 6.004124613        | -6.403665057 | 1.10E-08 | 4.82E-07         | 9.213706919 |
| LOC145694 | -0.949278469    | 0.014071486        | -6.393553412 | 1.15E-08 | 5.02E-07         | 9.579440595 |
| HR        | 0.42670798      | 3.229848901        | 6.391562828  | 1.16E-08 | 5.05E-07         | 9.352390163 |
| TFEB      | -0.446392471    | 2.25517721         | -6.388037741 | 1.18E-08 | 5.11E-07         | 9.408220401 |
| H2AFY2    | 0.362809296     | 3.804013247        | 6.371253393  | 1.26E-08 | 5.47E-07         | 9.223591616 |
| SMOX      | 0.446569965     | 3.63812164         | 6.367810246  | 1.28E-08 | 5.54E-07         | 9.203011123 |

| Gene      | Log fold change | Average Expression | t            | P-value  | Adjusted P-value | B           |
|-----------|-----------------|--------------------|--------------|----------|------------------|-------------|
| THRAP3    | -0.263608658    | 6.786861113        | -6.365739634 | 1.29E-08 | 5.57E-07         | 9.054053594 |
| ASXL1     | -0.396939721    | 6.03118855         | -6.356221564 | 1.35E-08 | 5.79E-07         | 9.018806787 |
| KDM1A     | 0.159700804     | 6.147168097        | 6.353558565  | 1.36E-08 | 5.84E-07         | 9.002574606 |
| MGME1     | 0.298082319     | 3.261437173        | 6.345483674  | 1.41E-08 | 5.99E-07         | 9.150639109 |
| PPP1R37   | 0.313333118     | 5.806505945        | 6.346067317  | 1.41E-08 | 5.99E-07         | 8.976162127 |
| ZHX3      | -0.454268615    | 6.112450758        | -6.346634734 | 1.40E-08 | 5.99E-07         | 8.97583803  |
| HIST1H2BJ | 0.749330461     | -0.651952373       | 6.342826272  | 1.43E-08 | 6.04E-07         | 9.418798485 |
| RAPGEFL1  | 0.537544942     | 0.705363245        | 6.341298737  | 1.44E-08 | 6.06E-07         | 9.386393679 |
| TBC1D12   | -0.466027205    | 3.43117724         | -6.339494948 | 1.45E-08 | 6.09E-07         | 9.122486239 |
| ZNF337    | 0.725350988     | -0.322842371       | 6.335925838  | 1.47E-08 | 6.17E-07         | 9.413009821 |
| FUT8      | -0.254213768    | 6.102206878        | -6.322862642 | 1.55E-08 | 6.48E-07         | 8.877465814 |
| PDE4DIP   | -0.230763821    | 6.560635395        | -6.323212193 | 1.55E-08 | 6.48E-07         | 8.875047553 |
| DUSP11    | 0.200378637     | 4.508397358        | 6.317787612  | 1.59E-08 | 6.61E-07         | 8.914074582 |
| UBL3      | -0.241818546    | 6.968783265        | -6.317224806 | 1.59E-08 | 6.61E-07         | 8.855934925 |
| FAM83G    | -0.518655661    | 3.792874725        | -6.308148483 | 1.65E-08 | 6.85E-07         | 9.001653922 |
| DGKQ      | 0.297162829     | 3.948917271        | 6.306672032  | 1.66E-08 | 6.87E-07         | 8.926627151 |
| ATF7      | 0.204703336     | 4.946653077        | 6.303471078  | 1.69E-08 | 6.95E-07         | 8.833701453 |
| PPP2R5D   | 0.247830751     | 5.904852937        | 6.300025335  | 1.71E-08 | 7.03E-07         | 8.785347469 |
| NDUFV3    | 0.304485487     | 4.988188979        | 6.298452363  | 1.72E-08 | 7.06E-07         | 8.808663735 |
| CALCOCO1  | -0.208922207    | 6.697765744        | -6.29368436  | 1.76E-08 | 7.18E-07         | 8.752005147 |
| PTCHD4    | 0.63159585      | 1.049987012        | 6.290480305  | 1.78E-08 | 7.26E-07         | 9.188196448 |
| PRR5      | 0.470367959     | 4.006929966        | 6.289508237  | 1.79E-08 | 7.27E-07         | 8.833382924 |
| RXRB      | 0.260073756     | 4.913670393        | 6.288109508  | 1.80E-08 | 7.30E-07         | 8.768863794 |
| MEX3C     | -0.250623642    | 5.533814869        | -6.287406093 | 1.81E-08 | 7.30E-07         | 8.744480786 |
| TNFAIP8L3 | -0.347811035    | 4.544047074        | -6.277243459 | 1.89E-08 | 7.60E-07         | 8.741203272 |
| ARHGAP17  | -0.225811852    | 6.305763663        | -6.272441469 | 1.93E-08 | 7.73E-07         | 8.663185193 |
| AXIN1     | -0.316603854    | 4.750588649        | -6.264259556 | 1.99E-08 | 7.99E-07         | 8.682277957 |
| PIK3CD    | -0.421579258    | 3.171888928        | -6.253571632 | 2.09E-08 | 8.34E-07         | 8.762701525 |
| CBL       | -0.560760181    | 4.166663103        | -6.250918518 | 2.11E-08 | 8.41E-07         | 8.650414408 |
| FMN1      | -0.694349633    | 2.862040545        | -6.247748968 | 2.14E-08 | 8.48E-07         | 8.808142102 |
| ZFC3H1    | -0.546136984    | 4.053920773        | -6.24827657  | 2.13E-08 | 8.48E-07         | 8.617596231 |
| BICD1     | -0.445536281    | 4.067378472        | -6.246292459 | 2.15E-08 | 8.51E-07         | 8.62170761  |
| KIAA1614  | 0.295385445     | 3.608454138        | 6.241429966  | 2.20E-08 | 8.66E-07         | 8.680470365 |
| LAMC2     | 0.446165901     | 1.961865542        | 6.239699012  | 2.21E-08 | 8.70E-07         | 8.895774397 |
| TTC23     | 0.29351162      | 4.056229276        | 6.236186091  | 2.25E-08 | 8.78E-07         | 8.607537005 |
| ABL1      | -0.269408963    | 8.120764505        | -6.23629097  | 2.24E-08 | 8.78E-07         | 8.552184971 |
| TSHZ3     | -0.372267403    | 5.979418649        | -6.23585044  | 2.25E-08 | 8.78E-07         | 8.518469822 |
| USP53     | -0.736536622    | 5.689863853        | -6.231297454 | 2.29E-08 | 8.92E-07         | 8.520424919 |
| HINT3     | -0.308471707    | 4.153468796        | -6.18320549  | 2.81E-08 | 1.09E-06         | 8.409142789 |
| USP21     | 0.323302632     | 3.607283331        | 6.180850288  | 2.84E-08 | 1.10E-06         | 8.429863536 |
| PPP3R1    | -0.272527747    | 4.977860866        | -6.177638275 | 2.88E-08 | 1.11E-06         | 8.305748337 |
| RPS6KA5   | 0.790943001     | 0.778951517        | 6.165032756  | 3.03E-08 | 1.17E-06         | 8.6938582   |
| ZCCHC14   | -0.366542979    | 6.731432286        | -6.163469147 | 3.05E-08 | 1.17E-06         | 8.214845763 |
| NIFK      | -0.298726054    | 5.308837163        | -6.154322031 | 3.18E-08 | 1.22E-06         | 8.195159099 |
| DISP1     | 0.450084919     | 2.757101556        | 6.150931639  | 3.22E-08 | 1.23E-06         | 8.392855256 |
| DCAF16    | -0.335745888    | 3.749407762        | -6.145749192 | 3.29E-08 | 1.26E-06         | 8.254114287 |
| LZTFL1    | -0.196113213    | 4.597979618        | -6.137915675 | 3.40E-08 | 1.29E-06         | 8.17220045  |
| LRIF1     | 0.28865042      | 3.627153635        | 6.136029978  | 3.43E-08 | 1.30E-06         | 8.236910777 |
| PPP2R5A   | 0.265881879     | 5.426380355        | 6.132487617  | 3.48E-08 | 1.32E-06         | 8.09365223  |
| MALT1     | -0.477754547    | 4.654921077        | -6.119126685 | 3.68E-08 | 1.39E-06         | 8.107873339 |
| PLD1      | -0.392027094    | 3.943127277        | -6.115194017 | 3.75E-08 | 1.41E-06         | 8.151475372 |
| UMAD1     | -0.276627314    | 3.73117527         | -6.111719002 | 3.80E-08 | 1.42E-06         | 8.142940773 |
| TGFBR1    | -0.646277408    | 6.723783455        | -6.111718946 | 3.80E-08 | 1.42E-06         | 7.998506023 |
| ZCCHC17   | 0.283169483     | 4.470208016        | 6.10922417   | 3.84E-08 | 1.44E-06         | 8.06002318  |
| IPO13     | 0.259969695     | 5.390031406        | 6.106467978  | 3.89E-08 | 1.45E-06         | 7.988180918 |
| CFL2      | -0.228291071    | 6.698324837        | -6.100219931 | 3.99E-08 | 1.48E-06         | 7.946723724 |
| RBM6      | -0.30360181     | 5.107470628        | -6.098105914 | 4.02E-08 | 1.49E-06         | 7.991062287 |
| KIAA0922  | -0.536196362    | 3.931763771        | -6.095282332 | 4.07E-08 | 1.51E-06         | 8.029806969 |
| ZNF598    | -0.231100357    | 5.010673749        | -6.094874349 | 4.08E-08 | 1.51E-06         | 7.960650704 |
| STEAP1    | -0.286162025    | 5.151362386        | -6.084763944 | 4.26E-08 | 1.57E-06         | 7.915159426 |
| TEX10     | -0.415258259    | 5.196076443        | -6.077654602 | 4.39E-08 | 1.61E-06         | 7.875193369 |
| NANS      | 0.291128003     | 5.030189328        | 6.074701871  | 4.44E-08 | 1.63E-06         | 7.87015331  |
| CGGBP1    | -0.272887196    | 6.292001153        | -6.065760646 | 4.61E-08 | 1.69E-06         | 7.805203944 |
| HECTD3    | 0.308481784     | 5.712393707        | 6.061541282  | 4.69E-08 | 1.71E-06         | 7.7972776   |
| CDR2L     | 0.195944692     | 5.560481528        | 6.056771191  | 4.79E-08 | 1.74E-06         | 7.776041131 |
| TRIB3     | -0.770058547    | 6.146656686        | -6.052168316 | 4.88E-08 | 1.77E-06         | 7.770117347 |
| MAP6D1    | 0.360757076     | 1.426853227        | 6.045641797  | 5.02E-08 | 1.81E-06         | 8.105212043 |
| PLEKHA4   | 0.295130324     | 6.905160502        | 6.045388894  | 5.02E-08 | 1.81E-06         | 7.725794445 |
| NOL3      | 0.463627084     | 2.4623553          | 6.042213978  | 5.09E-08 | 1.83E-06         | 7.998643187 |
| MAP2K1    | 0.189020434     | 5.113702048        | 6.04215774   | 5.09E-08 | 1.83E-06         | 7.734573818 |

| Gene      | Log fold change | Average Expression | t            | P-value  | Adjusted P-value | B           |
|-----------|-----------------|--------------------|--------------|----------|------------------|-------------|
| TLE3      | -0.459439808    | 5.205073148        | -6.037778432 | 5.19E-08 | 1.86E-06         | 7.728899155 |
| ATG2A     | 0.205582161     | 5.314992275        | 6.034993921  | 5.25E-08 | 1.88E-06         | 7.694946519 |
| JAK2      | -0.443507573    | 3.950715641        | -6.032317582 | 5.31E-08 | 1.89E-06         | 7.780053119 |
| ADRA2A    | -0.573513884    | 5.407615927        | -6.03203745  | 5.31E-08 | 1.89E-06         | 7.705509973 |
| ZCCHC7    | 0.264811815     | 3.980274554        | 6.027496455  | 5.42E-08 | 1.92E-06         | 7.755860234 |
| MBNL1     | -0.343031626    | 7.043340342        | -6.027188823 | 5.42E-08 | 1.92E-06         | 7.656232945 |
| BNIP2     | -0.295861921    | 5.977886095        | -6.026472705 | 5.44E-08 | 1.92E-06         | 7.646185761 |
| TFAP4     | -0.41874004     | 2.85314038         | -6.010081825 | 5.83E-08 | 2.06E-06         | 7.74240396  |
| SEH1L     | -0.333993387    | 5.243595622        | -6.003798842 | 5.98E-08 | 2.11E-06         | 7.563973654 |
| RRM2B     | 0.526878507     | 5.474807387        | 5.995662186  | 6.19E-08 | 2.17E-06         | 7.52919619  |
| PLEKHG5   | 0.549694801     | 1.89089943         | 5.994739926  | 6.21E-08 | 2.18E-06         | 7.936054118 |
| ATOX1     | -0.524036733    | 4.498553861        | -5.991605329 | 6.30E-08 | 2.20E-06         | 7.59282933  |
| FAM111A   | -0.373373569    | 4.714747735        | -5.990652038 | 6.32E-08 | 2.20E-06         | 7.571580695 |
| CCNE1     | -0.466125486    | 1.649013882        | -5.989208082 | 6.36E-08 | 2.21E-06         | 7.837973539 |
| FCST      | 0.323493063     | 6.619768423        | 5.989715481  | 6.35E-08 | 2.21E-06         | 7.491550034 |
| STK40     | -0.288498992    | 4.891972356        | -5.988129004 | 6.39E-08 | 2.21E-06         | 7.543352019 |
| RNF2      | -0.222290157    | 4.637927281        | -5.980883082 | 6.58E-08 | 2.28E-06         | 7.512691763 |
| SPIN4     | -0.595594255    | 1.98523633         | -5.977509005 | 6.68E-08 | 2.30E-06         | 7.807599688 |
| GSK3A     | 0.232875158     | 5.255430311        | 5.976406852  | 6.71E-08 | 2.31E-06         | 7.458290122 |
| CCNE2     | -1.231547081    | 0.026306582        | -5.962641226 | 7.11E-08 | 2.44E-06         | 7.915743883 |
| N4BP2L1   | 0.43635171      | 2.49685235         | 5.95169371   | 7.44E-08 | 2.55E-06         | 7.646323518 |
| MGEA5     | -0.433297523    | 6.190428515        | -5.949242556 | 7.52E-08 | 2.57E-06         | 7.326099272 |
| MOB2      | 0.306936973     | 4.081970548        | 5.941008711  | 7.78E-08 | 2.65E-06         | 7.392607889 |
| POLA2     | 0.321644303     | 3.397014172        | 5.938871726  | 7.85E-08 | 2.67E-06         | 7.460145392 |
| CDCA4     | -0.269064131    | 3.00130011         | -5.936882718 | 7.91E-08 | 2.69E-06         | 7.49954244  |
| RAB35     | -0.201130479    | 6.022381973        | -5.935282228 | 7.97E-08 | 2.70E-06         | 7.271690712 |
| HES2      | 1.771322761     | -2.587944919       | 5.932685498  | 8.05E-08 | 2.71E-06         | 7.57773301  |
| AEBP2     | 0.287917119     | 4.326962876        | 5.933120356  | 8.04E-08 | 2.71E-06         | 7.353454682 |
| TSPYL5    | -0.295304546    | 4.215347758        | -5.923449504 | 8.37E-08 | 2.81E-06         | 7.333505169 |
| MCM10     | -0.855769323    | 0.924570408        | -5.916333038 | 8.62E-08 | 2.89E-06         | 7.693111596 |
| NXT1      | -0.384842762    | 3.317768375        | -5.915185798 | 8.67E-08 | 2.89E-06         | 7.386821805 |
| RAD1      | -0.282165191    | 4.710254585        | -5.915414331 | 8.66E-08 | 2.89E-06         | 7.257139449 |
| LINC01679 | 0.828357414     | 0.197908324        | 5.912908227  | 8.75E-08 | 2.92E-06         | 7.705809917 |
| ZNF563    | 0.46644809      | 0.77161294         | 5.910199576  | 8.85E-08 | 2.94E-06         | 7.597390357 |
| TARS2     | 0.393737414     | 3.502339906        | 5.908400276  | 8.91E-08 | 2.95E-06         | 7.347509269 |
| GJC1      | -0.751810485    | 4.233130727        | -5.908778998 | 8.90E-08 | 2.95E-06         | 7.258531773 |
| U2SURP    | -0.266921202    | 5.642251186        | -5.906717882 | 8.98E-08 | 2.97E-06         | 7.166720089 |
| TWINK     | -0.422913217    | 3.423486625        | -5.903544948 | 9.10E-08 | 2.99E-06         | 7.329496467 |
| CDIP1     | 0.297300087     | 4.836958235        | 5.903410372  | 9.10E-08 | 2.99E-06         | 7.18558377  |
| PPARGC1B  | -1.07006454     | -0.028967557       | -5.898507054 | 9.29E-08 | 3.05E-06         | 7.582249157 |
| HIST1H2AG | 0.658569314     | 0.36249596         | 5.893366152  | 9.49E-08 | 3.11E-06         | 7.626127025 |
| PSTPIP2   | 0.415391304     | 2.24355641         | 5.876075939  | 1.02E-07 | 3.33E-06         | 7.340435406 |
| ST3GAL1   | -0.52309094     | 5.92300042         | -5.875679129 | 1.02E-07 | 3.33E-06         | 7.03106985  |
| MBNL2     | -0.404473934    | 4.966848271        | -5.866436189 | 1.06E-07 | 3.45E-06         | 7.044311528 |
| HSP90AB1  | 0.168719061     | 9.402644555        | 5.863611102  | 1.07E-07 | 3.49E-06         | 7.085322699 |
| STX5      | 0.246109944     | 5.806787924        | 5.861280137  | 1.08E-07 | 3.51E-06         | 6.971188843 |
| PPAT      | -0.572798529    | 2.894480482        | -5.857418999 | 1.10E-07 | 3.56E-06         | 7.12589458  |
| KLF16     | -0.369174113    | 4.802922398        | -5.857723061 | 1.10E-07 | 3.56E-06         | 7.044861355 |
| DAB2IP    | 0.318662792     | 6.453616113        | 5.856197895  | 1.11E-07 | 3.57E-06         | 6.946462928 |
| VPS37B    | 0.251744445     | 5.133458168        | 5.852944524  | 1.12E-07 | 3.61E-06         | 6.972763295 |
| NR2F2     | -0.35197592     | 6.329748965        | -5.851155124 | 1.13E-07 | 3.63E-06         | 6.923803624 |
| KIT       | -1.29199472     | 3.397774175        | -5.849939776 | 1.14E-07 | 3.64E-06         | 7.244415908 |
| BCL6      | 0.524462941     | 5.938922774        | 5.825416607  | 1.26E-07 | 4.02E-06         | 6.83926024  |
| MAPRE3    | 0.318404603     | 4.147758246        | 5.823382543  | 1.27E-07 | 4.03E-06         | 6.93222602  |
| HSPB8     | 0.364358982     | 4.728214553        | 5.823879925  | 1.27E-07 | 4.03E-06         | 6.87221706  |
| PHF13     | -0.599526942    | 5.251495747        | -5.822606861 | 1.27E-07 | 4.04E-06         | 6.847506033 |
| SRGAP2    | 0.359761649     | 5.247200741        | 5.819176312  | 1.29E-07 | 4.09E-06         | 6.81894087  |
| PLEKHG3   | 0.329087831     | 3.228756138        | 5.817844962  | 1.30E-07 | 4.10E-06         | 6.946771991 |
| CEP170B   | 0.216531277     | 5.366518976        | 5.815478557  | 1.31E-07 | 4.13E-06         | 6.794275093 |
| RAI14     | -0.388364952    | 6.442750697        | -5.814904682 | 1.32E-07 | 4.14E-06         | 6.77731378  |
| INTS3     | -0.307315503    | 5.008540437        | -5.813484618 | 1.32E-07 | 4.15E-06         | 6.829081014 |
| ZBTB1     | -0.325350473    | 5.146071725        | -5.809967077 | 1.34E-07 | 4.20E-06         | 6.799126036 |
| ARHGEF17  | -0.315542778    | 5.774788109        | -5.808207628 | 1.35E-07 | 4.23E-06         | 6.755132245 |
| REST      | -0.482298573    | 4.514536397        | -5.807583231 | 1.36E-07 | 4.23E-06         | 6.816974393 |
| STAT5A    | 0.217680932     | 4.999452527        | 5.798971452  | 1.40E-07 | 4.37E-06         | 6.747103713 |
| ZNF672    | 0.215017247     | 4.351264027        | 5.797903021  | 1.41E-07 | 4.38E-06         | 6.786180847 |
| WIPI2     | 0.166183283     | 6.344099156        | 5.797760635  | 1.41E-07 | 4.38E-06         | 6.706808447 |
| CDC6      | -0.502800673    | 2.79318541         | -5.791445821 | 1.45E-07 | 4.48E-06         | 6.938347152 |
| FTO       | -0.218825358    | 6.235342744        | -5.788637651 | 1.47E-07 | 4.53E-06         | 6.669603052 |
| ERBIN     | -0.377160881    | 6.036175868        | -5.784059661 | 1.49E-07 | 4.60E-06         | 6.656265739 |

| Gene      | Log fold change | Average Expression | t            | P-value  | Adjusted P-value | B           |
|-----------|-----------------|--------------------|--------------|----------|------------------|-------------|
| MVD       | 0.483016508     | 6.624514458        | 5.780674908  | 1.52E-07 | 4.66E-06         | 6.643661781 |
| USP16     | -0.225755621    | 5.647831324        | -5.776108459 | 1.54E-07 | 4.74E-06         | 6.62852173  |
| WDR91     | 0.333468074     | 2.691396339        | 5.774668223  | 1.55E-07 | 4.74E-06         | 6.881551505 |
| MACF1     | -0.524469649    | 7.50681922         | -5.774395564 | 1.56E-07 | 4.74E-06         | 6.6301543   |
| CCDC50    | -0.231540699    | 6.613315298        | -5.77465299  | 1.55E-07 | 4.74E-06         | 6.612542296 |
| NSMF      | 0.185416244     | 6.079412189        | 5.771729974  | 1.57E-07 | 4.79E-06         | 6.601280791 |
| ARHGAP29  | -0.540580017    | 6.531040245        | -5.770185732 | 1.58E-07 | 4.81E-06         | 6.59704782  |
| DYRK2     | -0.279084848    | 5.512439508        | -5.765914122 | 1.61E-07 | 4.88E-06         | 6.592080572 |
| C5orf30   | -0.487380742    | 3.22123045         | -5.763387957 | 1.63E-07 | 4.91E-06         | 6.790830772 |
| AFAP1     | -0.442715303    | 7.050306755        | -5.763640371 | 1.63E-07 | 4.91E-06         | 6.575009038 |
| RNF114    | 0.170659534     | 6.07224011         | 5.75929732   | 1.66E-07 | 4.99E-06         | 6.552523902 |
| SLC38A1   | -0.500935418    | 6.776361395        | -5.75243171  | 1.70E-07 | 5.12E-06         | 6.525463897 |
| SH3D19    | -0.202462003    | 7.199078096        | -5.749660549 | 1.72E-07 | 5.17E-06         | 6.516456391 |
| FAM13C    | 1.129419609     | -1.008473751       | 5.749165745  | 1.73E-07 | 5.17E-06         | 7.057573739 |
| CAMKK1    | -0.402573637    | 3.716931635        | -5.742303423 | 1.78E-07 | 5.31E-06         | 6.578332645 |
| SHANK3    | 0.348232168     | 2.510931501        | 5.735482252  | 1.83E-07 | 5.45E-06         | 6.758989413 |
| SMIM15    | -0.145226928    | 5.731025582        | -5.734672068 | 1.83E-07 | 5.46E-06         | 6.459782522 |
| MKNK1     | -0.27538907     | 3.842752584        | -5.732365184 | 1.85E-07 | 5.50E-06         | 6.603701737 |
| TMEM267   | -0.399223463    | 3.332230027        | -5.726382551 | 1.90E-07 | 5.62E-06         | 6.636765176 |
| CTCF      | -0.304428273    | 5.825345183        | -5.724154226 | 1.91E-07 | 5.67E-06         | 6.4135523   |
| SLC7A5    | -0.562677596    | 5.52721655         | -5.721180693 | 1.94E-07 | 5.72E-06         | 6.453883639 |
| YTHDF2    | -0.162053134    | 5.972099124        | -5.718761464 | 1.96E-07 | 5.77E-06         | 6.394211404 |
| COPS8     | 0.168965869     | 6.46311088         | 5.711648862  | 2.02E-07 | 5.93E-06         | 6.35771814  |
| KDM4B     | 0.267005983     | 5.396896254        | 5.710660115  | 2.02E-07 | 5.93E-06         | 6.36661892  |
| GTPBP4    | -0.456242278    | 5.73218001         | -5.710547619 | 2.02E-07 | 5.93E-06         | 6.364691228 |
| ZC3H4     | 0.275974445     | 4.74804751         | 5.705745819  | 2.07E-07 | 6.04E-06         | 6.381415853 |
| HIST2H2BE | 0.287404984     | 2.85973671         | 5.702833816  | 2.09E-07 | 6.10E-06         | 6.550013295 |
| UNC5B-AS1 | 1.028429204     | -1.601274719       | 5.698178644  | 2.13E-07 | 6.21E-06         | 6.835597521 |
| POLR1B    | -0.45705734     | 3.922830257        | -5.69438291  | 2.16E-07 | 6.29E-06         | 6.381197811 |
| STAM2     | -0.324693118    | 4.997047517        | -5.694008015 | 2.17E-07 | 6.29E-06         | 6.333352797 |
| WDR70     | -0.258916858    | 4.479631438        | -5.691205784 | 2.19E-07 | 6.35E-06         | 6.369849869 |
| FTH1      | 0.420452211     | 9.6883212          | 5.689283047  | 2.21E-07 | 6.39E-06         | 6.392016638 |
| STAU2     | -0.281126881    | 3.94009305         | -5.684515111 | 2.25E-07 | 6.50E-06         | 6.393062092 |
| GLUL      | 0.180345377     | 7.85090607         | 5.683707052  | 2.26E-07 | 6.50E-06         | 6.282350526 |
| MFHAS1    | -0.406070319    | 5.147151871        | -5.683817384 | 2.26E-07 | 6.50E-06         | 6.267479108 |
| ACSS2     | 0.353963031     | 6.101399312        | 5.682001703  | 2.28E-07 | 6.53E-06         | 6.239204837 |
| ACVR1B    | -0.34502967     | 4.535335083        | -5.672681888 | 2.37E-07 | 6.78E-06         | 6.270107586 |
| EEDP1     | -0.317089059    | 4.88099409         | -5.668369195 | 2.41E-07 | 6.89E-06         | 6.208600609 |
| FAM49A    | 0.805798506     | 0.423640779        | 5.666287402  | 2.43E-07 | 6.93E-06         | 6.715154341 |
| TRIM68    | 0.347587667     | 2.875231273        | 5.660576301  | 2.49E-07 | 7.06E-06         | 6.346348767 |
| MOSPD2    | -0.374301339    | 4.18114598         | -5.660568262 | 2.49E-07 | 7.06E-06         | 6.23233128  |
| TRIP6     | 0.30694005      | 6.69965479         | 5.6603084    | 2.49E-07 | 7.06E-06         | 6.152360993 |
| WDR76     | -0.464991417    | 2.141583849        | -5.65770841  | 2.52E-07 | 7.13E-06         | 6.500600435 |
| RTKN      | 0.296680115     | 3.428007467        | 5.655122928  | 2.54E-07 | 7.19E-06         | 6.2649519   |
| CEL       | 0.684437425     | -0.299063735       | 5.653986305  | 2.56E-07 | 7.21E-06         | 6.70252326  |
| USP12     | -0.341722344    | 4.182484426        | -5.652214518 | 2.57E-07 | 7.25E-06         | 6.223133274 |
| PPIF      | -0.423064328    | 5.894195507        | -5.651666734 | 2.58E-07 | 7.25E-06         | 6.125631518 |
| YAF2      | -0.273203983    | 3.825695567        | -5.64620608  | 2.64E-07 | 7.40E-06         | 6.21919006  |
| SAMM50    | 0.249625193     | 5.653486014        | 5.64386573   | 2.66E-07 | 7.46E-06         | 6.095693349 |
| RFXAP     | -0.396963549    | 2.021121426        | -5.643329675 | 2.67E-07 | 7.46E-06         | 6.505923383 |
| VPS37D    | 0.402328315     | 1.784647896        | 5.633202302  | 2.78E-07 | 7.76E-06         | 6.399797266 |
| B3GNT8    | 0.378679152     | 1.900385096        | 5.631678924  | 2.80E-07 | 7.80E-06         | 6.376215674 |
| MTHFD1L   | 0.20870703      | 6.662595569        | 5.630886645  | 2.81E-07 | 7.81E-06         | 6.035653987 |
| KIAA1211L | 1.718221415     | -2.888964804       | 5.625443246  | 2.87E-07 | 7.97E-06         | 6.358961755 |
| AQP5      | 1.582925594     | -3.519287679       | 5.620705629  | 2.93E-07 | 8.11E-06         | 6.285521582 |
| ZFAT      | -0.209255556    | 3.585641502        | -5.619662395 | 2.94E-07 | 8.13E-06         | 6.149600375 |
| ANGPTL4   | -0.675472862    | 2.4189572          | -5.61482524  | 3.00E-07 | 8.28E-06         | 6.330206225 |
| NADK2     | -0.285312481    | 4.631940222        | -5.613305224 | 3.02E-07 | 8.32E-06         | 6.019245278 |
| SF1       | -0.198771632    | 7.754640133        | -5.610506124 | 3.05E-07 | 8.40E-06         | 5.976332682 |
| RGS20     | 0.840346411     | -0.610300493       | 5.60651391   | 3.10E-07 | 8.52E-06         | 6.523638146 |
| APOL3     | 0.280455816     | 5.091969825        | 5.605816099  | 3.11E-07 | 8.53E-06         | 5.967101663 |
| PSMG3-AS1 | -0.356842734    | 3.837224839        | -5.605049076 | 3.12E-07 | 8.54E-06         | 6.090195963 |
| VEGFC     | -0.199036251    | 5.406986372        | -5.600840646 | 3.18E-07 | 8.67E-06         | 5.937323828 |
| GPSM1     | 0.234534109     | 5.830682005        | 5.599770033  | 3.19E-07 | 8.69E-06         | 5.913419387 |
| BRX1      | -0.306832164    | 4.265850565        | -5.599326667 | 3.20E-07 | 8.69E-06         | 6.043888606 |
| FBXL7     | -0.243534978    | 5.777906104        | -5.596884101 | 3.23E-07 | 8.77E-06         | 5.901806246 |
| PRELID1   | 0.294149776     | 4.093959139        | 5.594200663  | 3.27E-07 | 8.85E-06         | 5.989558682 |
| PRKAG2    | -0.284631518    | 3.425174674        | -5.593749336 | 3.27E-07 | 8.85E-06         | 6.060611965 |
| XRCC2     | -0.717335868    | -0.479939049       | -5.589838483 | 3.32E-07 | 8.96E-06         | 6.459262119 |
| HTR7P1    | -0.317874908    | 2.700114598        | -5.589033999 | 3.34E-07 | 8.96E-06         | 6.169390767 |



| Gene      | Log fold change | Average Expression | t            | P-value  | Adjusted P-value | B           |
|-----------|-----------------|--------------------|--------------|----------|------------------|-------------|
| DDIT4     | 0.621508491     | 3.769428838        | 5.590279402  | 3.32E-07 | 8.96E-06         | 6.000207084 |
| LRP3      | 0.226647432     | 7.069257127        | 5.589427654  | 3.33E-07 | 8.96E-06         | 5.873854651 |
| RFTN2     | 0.383693784     | 3.17546814         | 5.584562768  | 3.40E-07 | 9.10E-06         | 6.092043403 |
| TWF2      | 0.265353927     | 5.613795479        | 5.580813498  | 3.45E-07 | 9.21E-06         | 5.844259738 |
| ACAT2     | 0.400250822     | 5.335345129        | 5.580772614  | 3.45E-07 | 9.21E-06         | 5.842555136 |
| TMEM170B  | -0.496954789    | 2.7584743          | -5.580096907 | 3.46E-07 | 9.22E-06         | 6.095229751 |
| NUP85     | 0.231537026     | 4.06753551         | 5.575501666  | 3.52E-07 | 9.38E-06         | 5.917235042 |
| ENDOG     | 0.543089326     | 1.413662177        | 5.573886193  | 3.55E-07 | 9.43E-06         | 6.265118335 |
| LMCD1     | -0.566497478    | 6.67097804         | -5.570402586 | 3.60E-07 | 9.54E-06         | 5.793143291 |
| ATF3      | 0.868074128     | 2.357876858        | 5.567292873  | 3.65E-07 | 9.65E-06         | 6.244255629 |
| BTBD10    | 0.253306712     | 4.128512242        | 5.565487075  | 3.67E-07 | 9.69E-06         | 5.861469886 |
| ATP5B     | 0.165809152     | 8.603648314        | 5.565454635  | 3.67E-07 | 9.69E-06         | 5.84232796  |
| MEN1      | 0.298882191     | 5.350119782        | 5.557193764  | 3.80E-07 | 1.00E-05         | 5.761332746 |
| SMG9      | 0.285041321     | 4.22268709         | 5.556089088  | 3.82E-07 | 1.00E-05         | 5.817235729 |
| ASB1      | -0.262955703    | 5.014020565        | -5.550876507 | 3.90E-07 | 1.02E-05         | 5.764194435 |
| PLCL1     | -0.500860174    | 2.611429262        | -5.546832203 | 3.96E-07 | 1.04E-05         | 6.068177544 |
| CASP3     | -0.280205061    | 4.970203619        | -5.547084539 | 3.96E-07 | 1.04E-05         | 5.73346538  |
| FNDC3B    | -0.475411397    | 7.321398866        | -5.542758181 | 4.03E-07 | 1.05E-05         | 5.698889985 |
| SMTN      | 0.283201508     | 6.261889785        | 5.541787356  | 4.04E-07 | 1.05E-05         | 5.676631817 |
| DTWD2     | -0.659520312    | 1.27694599         | -5.535984249 | 4.14E-07 | 1.08E-05         | 6.150022515 |
| CEP120    | 0.381812725     | 4.029291108        | 5.535009769  | 4.16E-07 | 1.08E-05         | 5.764373083 |
| GABPA     | -0.247330378    | 4.605709174        | -5.52993819  | 4.25E-07 | 1.10E-05         | 5.694313457 |
| DDX20     | -0.265424588    | 4.389039194        | -5.526226383 | 4.31E-07 | 1.12E-05         | 5.707920949 |
| LAP3      | 0.204802532     | 5.716237855        | 5.524632361  | 4.34E-07 | 1.12E-05         | 5.612058016 |
| DNAJB5    | -0.282898824    | 4.03227693         | -5.52327125  | 4.36E-07 | 1.13E-05         | 5.710632309 |
| PARP12    | 0.29538161      | 3.028443045        | 5.522266854  | 4.38E-07 | 1.13E-05         | 5.832138176 |
| C19orf68  | 0.36108328      | 3.024283823        | 5.522606209  | 4.37E-07 | 1.13E-05         | 5.816636082 |
| IFT88     | -0.288133934    | 3.299475648        | -5.516246756 | 4.49E-07 | 1.15E-05         | 5.787917225 |
| ZNRF3     | -0.449577711    | 2.697124024        | -5.514944602 | 4.51E-07 | 1.15E-05         | 5.829078043 |
| PARP2     | 0.337079868     | 3.136684638        | 5.514840937  | 4.51E-07 | 1.15E-05         | 5.78454361  |
| MGC12916  | -0.747976399    | 0.649175589        | -5.513131342 | 4.55E-07 | 1.16E-05         | 6.126071429 |
| MIPOL1    | -0.365855739    | 1.996836849        | -5.510716902 | 4.59E-07 | 1.17E-05         | 5.961705532 |
| LOXL1-AS1 | -0.274364454    | 2.924088279        | -5.509744246 | 4.61E-07 | 1.17E-05         | 5.782325963 |
| PRXAP2    | 0.245591706     | 3.188632442        | 5.510080997  | 4.60E-07 | 1.17E-05         | 5.760064356 |
| FOXK2     | -0.222409326    | 5.727992708        | -5.510039284 | 4.60E-07 | 1.17E-05         | 5.554155225 |
| TNFAIP1   | 0.21922217      | 5.729832804        | 5.50609189   | 4.68E-07 | 1.18E-05         | 5.539703921 |
| SH3BP2    | 0.229458931     | 4.365007446        | 5.503943951  | 4.72E-07 | 1.19E-05         | 5.604813572 |
| EGR1      | 1.322587043     | 6.810030351        | 5.503348427  | 4.73E-07 | 1.19E-05         | 5.532634158 |
| RPTN      | 2.011870612     | -4.033151148       | 5.500532367  | 4.78E-07 | 1.20E-05         | 5.638987006 |
| FGD1      | 0.246789267     | 5.443223203        | 5.500904713  | 4.78E-07 | 1.20E-05         | 5.529005464 |
| PISD      | -0.265147186    | 4.044412885        | -5.496768944 | 4.86E-07 | 1.22E-05         | 5.601761766 |
| PTEN      | 0.17219601      | 6.632082941        | 5.496990987  | 4.85E-07 | 1.22E-05         | 5.498013885 |
| CORO1C    | -0.257370993    | 8.259969258        | -5.479311393 | 5.22E-07 | 1.31E-05         | 5.48515459  |
| TRAPPC4   | 0.230934196     | 4.37295111         | 5.473313935  | 5.34E-07 | 1.33E-05         | 5.484561404 |
| ILF2      | 0.170335892     | 6.887906996        | 5.47366912   | 5.34E-07 | 1.33E-05         | 5.413456875 |
| E2F5      | -0.428905925    | 1.062135124        | -5.472645055 | 5.36E-07 | 1.33E-05         | 5.902915852 |
| RABGGTA   | 0.336479329     | 4.057980442        | 5.471637407  | 5.38E-07 | 1.34E-05         | 5.534331812 |
| IFT81     | -0.240819269    | 3.62777345         | -5.461312472 | 5.61E-07 | 1.39E-05         | 5.514042119 |
| EFNB1     | 0.2441916       | 6.236242073        | 5.461712067  | 5.60E-07 | 1.39E-05         | 5.357633351 |
| TRIQQ     | -0.242083114    | 4.673065596        | -5.460465122 | 5.63E-07 | 1.39E-05         | 5.428019605 |
| SKIDA1    | -0.495812915    | 0.899748966        | -5.459186043 | 5.66E-07 | 1.40E-05         | 5.842532336 |
| PSMD3     | 0.235294137     | 6.717412405        | 5.455768782  | 5.74E-07 | 1.41E-05         | 5.336520177 |
| ZBTB42    | -0.373691618    | 1.949226508        | -5.451271273 | 5.84E-07 | 1.44E-05         | 5.691758875 |
| NR1D2     | -0.409586216    | 6.57873226         | -5.44446115  | 6.01E-07 | 1.48E-05         | 5.290003589 |
| CHST12    | 0.176418428     | 4.701401628        | 5.436262365  | 6.21E-07 | 1.52E-05         | 5.308343934 |
| NCALD     | -0.25454917     | 4.460875411        | -5.434139812 | 6.26E-07 | 1.53E-05         | 5.344058435 |
| KCNN4     | 0.808164774     | 0.729205748        | 5.431165733  | 6.34E-07 | 1.55E-05         | 5.765491066 |
| DPF3      | -0.612160225    | 1.59132432         | -5.428667551 | 6.40E-07 | 1.56E-05         | 5.565861917 |
| ZNF395    | -0.23125533     | 5.354431303        | -5.427382166 | 6.44E-07 | 1.57E-05         | 5.240444765 |
| AUNIP     | -0.632895221    | -0.253603411       | -5.426010555 | 6.47E-07 | 1.57E-05         | 5.830082455 |
| CNKSRR3   | -0.344700155    | 2.766523794        | -5.425683145 | 6.48E-07 | 1.57E-05         | 5.475848744 |
| DISP6     | 0.573817882     | 4.819377349        | 5.425591286  | 6.48E-07 | 1.57E-05         | 5.304335471 |
| PBX1      | -0.26987458     | 7.279924818        | -5.42584656  | 6.48E-07 | 1.57E-05         | 5.227594677 |
| USP40     | -0.318484668    | 5.300185567        | -5.420770573 | 6.61E-07 | 1.60E-05         | 5.226811926 |
| ATXN1     | -0.390134577    | 5.561416007        | -5.417159348 | 6.71E-07 | 1.62E-05         | 5.196355439 |
| SLC2A10   | -0.307401022    | 6.191886874        | -5.416704694 | 6.72E-07 | 1.62E-05         | 5.182857352 |
| CLEC16A   | 0.288921999     | 4.464108646        | 5.413541527  | 6.81E-07 | 1.64E-05         | 5.269800052 |
| CCDC28A   | 0.3852351       | 2.465225822        | 5.411823796  | 6.86E-07 | 1.65E-05         | 5.446077053 |
| C20orf24  | 0.441852496     | 2.143175913        | 5.407757016  | 6.97E-07 | 1.67E-05         | 5.496106387 |
| LANCL2    | -0.281927716    | 4.704874196        | -5.407765428 | 6.97E-07 | 1.67E-05         | 5.206121748 |

| Gene         | Log fold change | Average Expression | t            | P-value  | Adjusted P-value | B           |
|--------------|-----------------|--------------------|--------------|----------|------------------|-------------|
| PTER         | -0.33667721     | 3.711802265        | -5.398067955 | 7.25E-07 | 1.73E-05         | 5.291270635 |
| MLF2         | 0.24375088      | 7.175422647        | 5.393132276  | 7.39E-07 | 1.76E-05         | 5.098934599 |
| PHAX         | -0.24845177     | 5.877160807        | -5.386594594 | 7.59E-07 | 1.81E-05         | 5.067369121 |
| ASPM         | -0.618456933    | 2.90914576         | -5.385609675 | 7.62E-07 | 1.81E-05         | 5.3230616   |
| EIF4H        | 0.118538677     | 7.236233068        | 5.381444325  | 7.75E-07 | 1.84E-05         | 5.055828398 |
| ABHD4        | 0.253232919     | 7.141092608        | 5.381189081  | 7.76E-07 | 1.84E-05         | 5.048600372 |
| MIR3189      | 1.856262974     | -3.122669002       | 5.378206804  | 7.85E-07 | 1.86E-05         | 5.460163613 |
| FAM122B      | -0.234582724    | 3.634101005        | -5.378552524 | 7.84E-07 | 1.86E-05         | 5.192658228 |
| NCOA2        | 0.715214919     | 5.315487863        | 5.377774275  | 7.87E-07 | 1.86E-05         | 5.051449474 |
| KCTD9        | -0.230444628    | 4.508153883        | -5.375472792 | 7.94E-07 | 1.87E-05         | 5.085854601 |
| BMP4         | 0.896534617     | 1.417703532        | 5.36988373   | 8.12E-07 | 1.91E-05         | 5.472221037 |
| SRC          | 0.210098802     | 6.046066664        | 5.368866131  | 8.15E-07 | 1.92E-05         | 4.992855923 |
| THOP1        | 0.225484278     | 4.967169799        | 5.367944094  | 8.18E-07 | 1.92E-05         | 5.027904027 |
| CCT6A        | 0.126838968     | 7.47940173         | 5.358306627  | 8.51E-07 | 1.99E-05         | 4.973777621 |
| POLR1E       | -0.197142673    | 5.354264436        | -5.357168349 | 8.55E-07 | 2.00E-05         | 4.969855536 |
| TGFB1        | 0.282819455     | 7.251656543        | 5.357409792  | 8.54E-07 | 2.00E-05         | 4.959632767 |
| C1orf174     | -0.21370201     | 3.818757063        | -5.352288805 | 8.72E-07 | 2.03E-05         | 5.04814674  |
| MAT2A        | -0.547039759    | 6.516654653        | -5.349657873 | 8.81E-07 | 2.05E-05         | 4.917996743 |
| RTN4RL1      | 0.54389896      | 2.56083332         | 5.344836303  | 8.98E-07 | 2.09E-05         | 5.157804791 |
| SERTAD1      | 0.463028196     | 5.025227155        | 5.341973418  | 9.08E-07 | 2.10E-05         | 4.975084154 |
| NAT10        | 0.180902348     | 5.644662629        | 5.34252631   | 9.06E-07 | 2.10E-05         | 4.892378954 |
| AGFG1        | -0.309073178    | 5.999771392        | -5.342288288 | 9.07E-07 | 2.10E-05         | 4.887769874 |
| AGO2         | -0.395149843    | 6.18688829         | -5.337502108 | 9.25E-07 | 2.14E-05         | 4.869569393 |
| RAD51C       | 0.323035886     | 3.025764187        | 5.33625755   | 9.30E-07 | 2.14E-05         | 5.133032477 |
| INSIG1       | -0.528172662    | 8.714058717        | -5.333585352 | 9.40E-07 | 2.16E-05         | 4.951740879 |
| POLRMT       | 0.23603306      | 4.041310195        | 5.331703066  | 9.47E-07 | 2.17E-05         | 4.932782307 |
| KPNA4        | -0.227296814    | 6.625467506        | -5.331693577 | 9.47E-07 | 2.17E-05         | 4.846077544 |
| SPIDR        | -0.171627218    | 5.630945731        | -5.327865109 | 9.61E-07 | 2.20E-05         | 4.843763527 |
| LOC101930085 | -0.23139376     | 3.392213531        | -5.326365955 | 9.67E-07 | 2.21E-05         | 5.029129623 |
| PARN         | -0.142402557    | 5.362290095        | -5.324727917 | 9.74E-07 | 2.22E-05         | 4.844794479 |
| PAFAH1B2     | -0.237140044    | 6.19126496         | -5.324934409 | 9.73E-07 | 2.22E-05         | 4.819123614 |
| ICE2         | -0.238421452    | 4.492896077        | -5.321579461 | 9.86E-07 | 2.25E-05         | 4.896087716 |
| ZFYVE1       | 0.297271855     | 5.491491583        | 5.317931516  | 1.00E-06 | 2.28E-05         | 4.79521414  |
| ZNF596       | 0.476203666     | 1.220380087        | 5.315850805  | 1.01E-06 | 2.29E-05         | 5.251980176 |
| LOC105371267 | 0.672318239     | -0.056561502       | 5.313629834  | 1.02E-06 | 2.31E-05         | 5.402038608 |
| TFDP2        | -0.208219428    | 5.222223075        | -5.313612225 | 1.02E-06 | 2.31E-05         | 4.80598823  |
| LOC100129484 | 0.540709512     | 0.594312904        | 5.313192578  | 1.02E-06 | 2.31E-05         | 5.342113106 |
| NAA25        | -0.451640012    | 3.741589155        | -5.303712366 | 1.06E-06 | 2.39E-05         | 4.847921155 |
| ANKRD33B     | 0.578015504     | 4.71865765         | 5.302991151  | 1.06E-06 | 2.40E-05         | 4.776311319 |
| PDE12        | -0.31818237     | 4.810012686        | -5.302357159 | 1.07E-06 | 2.40E-05         | 4.783474633 |
| LURAP1L      | 0.322037321     | 5.060392173        | 5.294245002  | 1.10E-06 | 2.47E-05         | 4.734249679 |
| AK1          | 0.32350684      | 4.047391097        | 5.293099399  | 1.11E-06 | 2.48E-05         | 4.80899695  |
| HIF1A        | -0.590656967    | 8.480555201        | -5.288703369 | 1.12E-06 | 2.52E-05         | 4.752495974 |
| EPS15L1      | 0.194094899     | 5.364930811        | 5.284790291  | 1.14E-06 | 2.56E-05         | 4.683810066 |
| FAM214B      | -0.287547216    | 4.182907705        | -5.283757779 | 1.15E-06 | 2.56E-05         | 4.741045069 |
| TRIM28       | 0.225936413     | 8.119257323        | 5.283637589  | 1.15E-06 | 2.56E-05         | 4.703930005 |
| WASF1        | -0.199627132    | 5.019080802        | -5.280682626 | 1.16E-06 | 2.59E-05         | 4.690533936 |
| CDCA8        | -0.548326543    | 1.85808182         | -5.279113327 | 1.17E-06 | 2.60E-05         | 5.04606529  |
| GCLM         | -0.393225293    | 5.13316337         | -5.279366064 | 1.17E-06 | 2.60E-05         | 4.665260074 |
| MAML2        | -0.537100947    | 5.027235201        | -5.274168767 | 1.19E-06 | 2.65E-05         | 4.663350713 |
| PRKAA1       | -0.453334887    | 5.663321824        | -5.271928534 | 1.20E-06 | 2.67E-05         | 4.621353764 |
| TNKS1BP1     | -0.167881174    | 8.768560684        | -5.269733005 | 1.21E-06 | 2.68E-05         | 4.686811979 |
| SIN3A        | -0.389850902    | 5.491863357        | -5.269780272 | 1.21E-06 | 2.68E-05         | 4.612255668 |
| POGK         | -0.21415864     | 5.761933486        | -5.267151054 | 1.23E-06 | 2.70E-05         | 4.603673461 |
| CCDC90B      | 0.222211086     | 5.688668447        | 5.265847005  | 1.23E-06 | 2.71E-05         | 4.60261505  |
| CES3         | 1.542107585     | -3.711593821       | 5.260411555  | 1.26E-06 | 2.77E-05         | 4.95299963  |
| TUBB2A       | 0.233153753     | 4.516978986        | 5.258510881  | 1.27E-06 | 2.79E-05         | 4.611024914 |
| ORC5         | 0.256972504     | 3.347553121        | 5.255784248  | 1.28E-06 | 2.81E-05         | 4.713029104 |
| PMAIP1       | 0.805652729     | 1.715422618        | 5.254550966  | 1.29E-06 | 2.82E-05         | 5.021272866 |
| ELMOD3       | 0.296166492     | 2.856801377        | 5.253766262  | 1.29E-06 | 2.83E-05         | 4.818864624 |
| FAM173B      | -0.244303231    | 3.470259647        | -5.248247246 | 1.32E-06 | 2.89E-05         | 4.714963412 |
| ARHGAP35     | -0.368301288    | 7.381156821        | -5.246929541 | 1.33E-06 | 2.90E-05         | 4.529051809 |
| INHBB        | 0.533061116     | 4.105963332        | 5.24464316   | 1.34E-06 | 2.92E-05         | 4.593837066 |
| SEC22A       | 0.196697957     | 3.528300214        | 5.244062291  | 1.34E-06 | 2.92E-05         | 4.663656093 |
| SPATS2       | 0.172713425     | 4.290155797        | 5.243633866  | 1.35E-06 | 2.92E-05         | 4.597851991 |
| CNPPD1       | 0.230456012     | 5.611593759        | 5.242251322  | 1.35E-06 | 2.94E-05         | 4.508982017 |
| ZNF354B      | -0.409684817    | 1.277720564        | -5.241072542 | 1.36E-06 | 2.95E-05         | 4.959969479 |
| ARNTL        | -0.264448563    | 3.101560028        | -5.239646036 | 1.37E-06 | 2.96E-05         | 4.700598416 |
| UVRAG        | 0.250357576     | 4.424454725        | 5.237880278  | 1.38E-06 | 2.97E-05         | 4.576716272 |
| USP1         | -0.262234321    | 5.082302706        | -5.237652731 | 1.38E-06 | 2.97E-05         | 4.509895774 |

| Gene         | Log fold change | Average Expression | t            | P-value  | Adjusted P-value | B           |
|--------------|-----------------|--------------------|--------------|----------|------------------|-------------|
| PLEKHG2      | -0.272184067    | 4.956632951        | -5.235120842 | 1.39E-06 | 3.00E-05         | 4.516719678 |
| BAHD1        | -0.409249175    | 4.528411111        | -5.234491589 | 1.40E-06 | 3.00E-05         | 4.521704048 |
| CASP2        | -0.241040003    | 4.346811738        | -5.231411293 | 1.41E-06 | 3.03E-05         | 4.521239387 |
| SNRPB        | 0.309926541     | 5.61870166         | 5.231729325  | 1.41E-06 | 3.03E-05         | 4.461699174 |
| LSR          | 0.677269609     | -0.029139993       | 5.227949817  | 1.43E-06 | 3.07E-05         | 5.055012952 |
| SS18         | -0.251312068    | 5.341592048        | -5.223033384 | 1.46E-06 | 3.12E-05         | 4.436047587 |
| SOCS6        | -0.299453264    | 4.845977168        | -5.220853089 | 1.48E-06 | 3.14E-05         | 4.46461008  |
| TEAD1        | -0.589907848    | 7.309698512        | -5.221200227 | 1.47E-06 | 3.14E-05         | 4.438210392 |
| LARP1        | -0.279317282    | 7.448734189        | -5.211060925 | 1.53E-06 | 3.26E-05         | 4.398546775 |
| EIF2B4       | 0.26369138      | 4.922494569        | 5.208878998  | 1.55E-06 | 3.28E-05         | 4.407011836 |
| CSNK1D       | -0.186028935    | 6.373260013        | -5.20911981  | 1.55E-06 | 3.28E-05         | 4.366879982 |
| SPTLC3       | -0.310834479    | 2.509336805        | -5.203754417 | 1.58E-06 | 3.35E-05         | 4.704697754 |
| MINDY2       | -0.453233616    | 5.539931885        | -5.203284241 | 1.58E-06 | 3.35E-05         | 4.362561434 |
| TNFAIP2      | -0.376725563    | 5.180757656        | -5.200456454 | 1.60E-06 | 3.38E-05         | 4.37578083  |
| BCDIN3D      | 0.333262744     | 1.463905654        | 5.19853354   | 1.61E-06 | 3.40E-05         | 4.746811676 |
| MID1IP1      | -0.209327229    | 5.248961084        | -5.190200241 | 1.67E-06 | 3.51E-05         | 4.32448622  |
| ZNF398       | -0.39433372     | 4.836544897        | -5.180921407 | 1.73E-06 | 3.64E-05         | 4.307197299 |
| XRCC6        | 0.129221377     | 8.083173543        | 5.179773247  | 1.74E-06 | 3.65E-05         | 4.301264312 |
| ZC2HC1A      | -0.319796315    | 3.417683388        | -5.174795038 | 1.77E-06 | 3.72E-05         | 4.450249406 |
| WASL         | -0.281237462    | 6.017048397        | -5.172811069 | 1.79E-06 | 3.74E-05         | 4.229587932 |
| BCAS3        | -0.204031355    | 4.58841566         | -5.168542791 | 1.82E-06 | 3.80E-05         | 4.285851002 |
| SETD1B       | -0.461409396    | 4.847184981        | -5.16842665  | 1.82E-06 | 3.80E-05         | 4.231350215 |
| CEP68        | 0.281657583     | 4.418249454        | 5.163455827  | 1.85E-06 | 3.87E-05         | 4.248223467 |
| RPGR         | -0.352395274    | 1.789116968        | -5.161335873 | 1.87E-06 | 3.89E-05         | 4.636165912 |
| SCAMP3       | 0.193222714     | 6.025341279        | 5.155231753  | 1.91E-06 | 3.98E-05         | 4.161830456 |
| UBTF         | 0.149175192     | 7.103248139        | 5.150745875  | 1.95E-06 | 4.05E-05         | 4.153416872 |
| RNF168       | -0.256504866    | 4.640752936        | -5.147671591 | 1.97E-06 | 4.09E-05         | 4.191086478 |
| CYFIP2       | 0.372050846     | 3.247507398        | 5.145922283  | 1.99E-06 | 4.11E-05         | 4.327291537 |
| ZNRF1        | 0.240932095     | 4.04494041         | 5.146239573  | 1.98E-06 | 4.11E-05         | 4.230524488 |
| GFOD1        | -0.617840355    | 0.851941371        | -5.144312554 | 2.00E-06 | 4.13E-05         | 4.666104799 |
| ASPHD1       | 0.376165198     | 1.865123863        | 5.143414839  | 2.01E-06 | 4.14E-05         | 4.511518201 |
| AKAP17A      | -0.303067056    | 4.437689016        | -5.143192805 | 2.01E-06 | 4.14E-05         | 4.192247868 |
| LPIN2        | -0.271130664    | 5.651252628        | -5.137679982 | 2.05E-06 | 4.22E-05         | 4.102922151 |
| KY           | 0.701058542     | 0.221966586        | 5.137265409  | 2.06E-06 | 4.22E-05         | 4.689785031 |
| CDK6         | -0.444020713    | 4.581216609        | -5.131222327 | 2.11E-06 | 4.32E-05         | 4.130966321 |
| SPRN         | 0.604737368     | 0.49758932         | 5.129528804  | 2.12E-06 | 4.34E-05         | 4.636376151 |
| PDP2         | -0.59071572     | 3.563233644        | -5.1280983   | 2.13E-06 | 4.36E-05         | 4.221826028 |
| SCYL1        | 0.191023862     | 6.840004899        | 5.123004875  | 2.17E-06 | 4.45E-05         | 4.040693777 |
| NCEH1        | 0.459941168     | 3.408338628        | 5.117368904  | 2.22E-06 | 4.54E-05         | 4.227172021 |
| RECQL5       | 0.276479682     | 3.005568504        | 5.114435811  | 2.25E-06 | 4.59E-05         | 4.270659181 |
| ACOT2        | 0.222398875     | 3.497236462        | 5.113122552  | 2.26E-06 | 4.60E-05         | 4.163722553 |
| EIF2B3       | 0.25761347      | 4.459012576        | 5.113205549  | 2.26E-06 | 4.60E-05         | 4.084111636 |
| TMEM160      | 0.574649703     | 1.813599221        | 5.108781645  | 2.30E-06 | 4.66E-05         | 4.423513943 |
| JARID2       | -0.382065273    | 3.250508947        | -5.109057609 | 2.30E-06 | 4.66E-05         | 4.180125753 |
| RASA2        | -0.496820996    | 3.925605774        | -5.106456532 | 2.32E-06 | 4.70E-05         | 4.104732694 |
| TAF5L        | -0.331428031    | 4.046197342        | -5.104550371 | 2.34E-06 | 4.73E-05         | 4.090804603 |
| ANKRD13B     | 0.295537584     | 4.322104598        | 5.102691316  | 2.36E-06 | 4.76E-05         | 4.051820095 |
| SPATA7       | 0.229325548     | 3.805807203        | 5.095147007  | 2.43E-06 | 4.90E-05         | 4.058106554 |
| RHOBTB1      | -0.327728325    | 4.118399134        | -5.092476546 | 2.45E-06 | 4.94E-05         | 4.035159226 |
| PLEKHJ1      | 0.299440181     | 4.541051096        | 5.092262857  | 2.46E-06 | 4.94E-05         | 3.986834752 |
| NFKBIE       | 0.349714418     | 2.782827442        | 5.082380039  | 2.55E-06 | 5.13E-05         | 4.119510253 |
| E2F2         | -0.910069296    | -0.456034884       | -5.079213799 | 2.58E-06 | 5.18E-05         | 4.526611128 |
| RTP4         | 0.41792399      | 1.140072407        | 5.076893389  | 2.61E-06 | 5.23E-05         | 4.345735551 |
| MRPL44       | 0.17450313      | 4.157932323        | 5.074630632  | 2.63E-06 | 5.27E-05         | 3.951294492 |
| LINC00909    | 0.331953932     | 1.925596144        | 5.072150196  | 2.66E-06 | 5.31E-05         | 4.262873226 |
| PAG1         | 0.574628808     | 3.04878266         | 5.071366812  | 2.67E-06 | 5.32E-05         | 4.0674421   |
| WDR3         | -0.270561056    | 5.182466021        | -5.070536986 | 2.67E-06 | 5.33E-05         | 3.853432467 |
| SLC4A11      | 0.582899084     | 1.252786579        | 5.070031506  | 2.68E-06 | 5.33E-05         | 4.328984707 |
| LOC101927204 | -0.404271517    | 1.173666624        | -5.063183606 | 2.75E-06 | 5.47E-05         | 4.336974252 |
| LINC00294    | 0.464062305     | 2.899267723        | 5.061734418  | 2.77E-06 | 5.50E-05         | 4.073054818 |
| LINC00968    | -0.650901201    | 1.055484408        | -5.059986154 | 2.79E-06 | 5.53E-05         | 4.278807353 |
| LRRC8A       | -0.280624037    | 6.696913039        | -5.054573802 | 2.85E-06 | 5.64E-05         | 3.774026103 |
| LYRM7        | -0.222638779    | 3.78862417         | -5.050241864 | 2.90E-06 | 5.72E-05         | 3.916361795 |
| ACTA2        | 0.232772359     | 6.35846942         | 5.050174813  | 2.90E-06 | 5.72E-05         | 3.755515413 |
| SPTSSA       | 0.175443343     | 4.848344126        | 5.049172994  | 2.91E-06 | 5.74E-05         | 3.79169415  |
| SLC35C2      | -0.158696829    | 5.428686615        | -5.042834036 | 2.98E-06 | 5.87E-05         | 3.752117792 |
| GIT1         | -0.201360644    | 5.775790984        | -5.036315476 | 3.06E-06 | 6.02E-05         | 3.706435196 |
| KIF4A        | -0.53810941     | 2.224821626        | -5.035408652 | 3.07E-06 | 6.03E-05         | 4.090196413 |
| SNX30        | -0.353146096    | 5.460957192        | -5.034939713 | 3.08E-06 | 6.03E-05         | 3.709984451 |
| ALG6         | -0.233420294    | 3.337235658        | -5.032349731 | 3.11E-06 | 6.09E-05         | 3.917072962 |

| Gene      | Log fold change | Average Expression | t            | P-value  | Adjusted P-value | B           |
|-----------|-----------------|--------------------|--------------|----------|------------------|-------------|
| NPL       | 0.488585179     | 0.461148695        | 5.031371857  | 3.12E-06 | 6.10E-05         | 4.296108662 |
| MNT       | -0.278647334    | 5.318655716        | -5.031278174 | 3.12E-06 | 6.10E-05         | 3.737717184 |
| NBEA      | -0.562287196    | 2.515692331        | -5.027813399 | 3.16E-06 | 6.17E-05         | 3.992730921 |
| SELENOO   | 0.297811801     | 3.877890603        | 5.0277567    | 3.16E-06 | 6.17E-05         | 3.793607732 |
| RHOJ      | 0.396777888     | 2.862563164        | 5.02632994   | 3.18E-06 | 6.18E-05         | 3.857755556 |
| SMARCAL1  | 0.183176532     | 4.950116576        | 5.0263557    | 3.18E-06 | 6.18E-05         | 3.714901012 |
| PXYLP1    | 0.331265156     | 3.890893083        | 5.024356017  | 3.21E-06 | 6.22E-05         | 3.766395788 |
| TARS      | -0.271041391    | 7.411816593        | -5.022637701 | 3.23E-06 | 6.26E-05         | 3.661676473 |
| TRMT2A    | 0.251900008     | 3.844730701        | 5.020556936  | 3.25E-06 | 6.30E-05         | 3.762397698 |
| GAL3ST4   | 0.226083917     | 4.543830175        | 5.018991582  | 3.27E-06 | 6.33E-05         | 3.710787607 |
| ATP6V1B2  | -0.372475668    | 7.147421766        | -5.018629001 | 3.28E-06 | 6.33E-05         | 3.647145559 |
| HS6ST1    | -0.31158842     | 4.628138271        | -5.016265861 | 3.31E-06 | 6.38E-05         | 3.705229712 |
| PNN       | -0.363552018    | 5.141509249        | -5.015642125 | 3.32E-06 | 6.39E-05         | 3.650425427 |
| KIF14     | -0.79958661     | 0.815482183        | -5.01341725  | 3.35E-06 | 6.44E-05         | 4.204571225 |
| COA7      | -0.246663341    | 5.227673055        | -5.007870949 | 3.42E-06 | 6.57E-05         | 3.624071953 |
| COX5A     | 0.261870948     | 5.730418439        | 4.998504399  | 3.55E-06 | 6.81E-05         | 3.567708331 |
| HAUS3     | -0.369683359    | 2.308327909        | -4.997470192 | 3.56E-06 | 6.83E-05         | 3.874944395 |
| MSX2      | 0.613188804     | 2.439421403        | 4.995822663  | 3.59E-06 | 6.84E-05         | 3.875114386 |
| ROCK2     | -0.398311351    | 6.426017177        | -4.996217501 | 3.58E-06 | 6.84E-05         | 3.550339254 |
| ANKRD28   | -0.304544612    | 6.333690819        | -4.996025118 | 3.58E-06 | 6.84E-05         | 3.549465964 |
| MAP3K10   | 0.365666815     | 2.729229699        | 4.992265269  | 3.64E-06 | 6.93E-05         | 3.830393326 |
| MLLT3     | 0.386502427     | 3.68347239         | 4.989764406  | 3.67E-06 | 6.99E-05         | 3.699053242 |
| SOX12     | -0.219839677    | 5.779609378        | -4.986397278 | 3.72E-06 | 7.07E-05         | 3.517759499 |
| NEDD4     | -0.368702879    | 4.385058781        | -4.985574561 | 3.73E-06 | 7.09E-05         | 3.605019931 |
| REXO4     | 0.172315873     | 4.968767575        | 4.985303639  | 3.74E-06 | 7.09E-05         | 3.545159048 |
| MB21D2    | -0.339302666    | 2.723524154        | -4.978705593 | 3.83E-06 | 7.26E-05         | 3.846136738 |
| BNC2      | -0.474058757    | 5.432235117        | -4.976293794 | 3.87E-06 | 7.32E-05         | 3.49330784  |
| INPP1     | 0.17599952      | 4.694934988        | 4.974268289  | 3.90E-06 | 7.37E-05         | 3.521395895 |
| TOR2A     | 0.330486444     | 2.166293741        | 4.973822728  | 3.91E-06 | 7.37E-05         | 3.789179249 |
| PPM1B     | -0.210658632    | 4.549818065        | -4.972666372 | 3.92E-06 | 7.40E-05         | 3.525890239 |
| HRH1      | -0.390043885    | 4.530205225        | -4.971427428 | 3.94E-06 | 7.43E-05         | 3.520845697 |
| HERC3     | -0.400104248    | 4.699388129        | -4.969246809 | 3.98E-06 | 7.48E-05         | 3.509075961 |
| CENPF     | -0.397356871    | 4.782521553        | -4.968845319 | 3.98E-06 | 7.48E-05         | 3.516424157 |
| SKI       | -0.196782402    | 7.801894787        | -4.96572269  | 4.03E-06 | 7.56E-05         | 3.468772768 |
| GCLC      | -0.275624401    | 3.824491427        | -4.964042019 | 4.06E-06 | 7.60E-05         | 3.556650077 |
| C1D       | -0.280807426    | 2.341325739        | -4.962954727 | 4.08E-06 | 7.63E-05         | 3.771520261 |
| RGCC      | -0.634036393    | 3.982165762        | -4.959025394 | 4.14E-06 | 7.72E-05         | 3.529022959 |
| ANKRD27   | -0.299208967    | 4.439683229        | -4.959065728 | 4.14E-06 | 7.72E-05         | 3.465312965 |
| ANTXR2    | -0.29918728     | 7.764460551        | -4.959580305 | 4.13E-06 | 7.72E-05         | 3.437231403 |
| SLC39A7   | 0.11978413      | 7.498341312        | 4.958367038  | 4.15E-06 | 7.72E-05         | 3.430073845 |
| PAPOLA    | -0.212973144    | 7.031438212        | -4.95811596  | 4.15E-06 | 7.72E-05         | 3.412499052 |
| NEK1      | -0.396244754    | 4.777719625        | -4.95286611  | 4.24E-06 | 7.85E-05         | 3.444848452 |
| ADO       | -0.164121154    | 5.077587352        | -4.953062754 | 4.24E-06 | 7.85E-05         | 3.42369261  |
| KDELR3    | 0.188569767     | 6.931293572        | 4.953215935  | 4.23E-06 | 7.85E-05         | 3.392671854 |
| WWC2      | -0.344357307    | 4.914778638        | -4.952304299 | 4.25E-06 | 7.86E-05         | 3.423958039 |
| SUGP2     | -0.202886627    | 4.7017483          | -4.951054643 | 4.27E-06 | 7.89E-05         | 3.442096614 |
| SLC12A7   | 0.395051953     | 4.13281493         | 4.950259259  | 4.28E-06 | 7.90E-05         | 3.479988959 |
| PCMTD2    | -0.278922022    | 4.41777094         | -4.950476587 | 4.28E-06 | 7.90E-05         | 3.467627855 |
| TUBA4A    | 0.428407671     | 2.672043361        | 4.949011679  | 4.30E-06 | 7.92E-05         | 3.614705295 |
| BTF3L4    | -0.24383287     | 4.714338382        | -4.944705445 | 4.38E-06 | 8.05E-05         | 3.43075556  |
| HAND2-AS1 | -0.314699661    | 2.820986694        | -4.943419068 | 4.40E-06 | 8.08E-05         | 3.642725033 |
| FZD4      | -0.275054834    | 4.397280289        | -4.941655474 | 4.43E-06 | 8.11E-05         | 3.414843846 |
| IMPDH1    | 0.192571508     | 5.744370048        | 4.94214428   | 4.42E-06 | 8.11E-05         | 3.352111455 |
| PSMC4     | 0.230038656     | 5.951134861        | 4.941638931  | 4.43E-06 | 8.11E-05         | 3.346152013 |
| TBC1D31   | 0.35110213      | 1.815630738        | 4.939628162  | 4.46E-06 | 8.16E-05         | 3.750245039 |
| TBC1D20   | -0.144521368    | 6.723038235        | -4.935972428 | 4.53E-06 | 8.27E-05         | 3.322290806 |
| LINC00324 | 0.752127271     | -0.699277596       | 4.934954783  | 4.55E-06 | 8.29E-05         | 4.017897252 |
| ZNHIT6    | -0.213728404    | 5.00331552         | -4.932759284 | 4.58E-06 | 8.35E-05         | 3.351324318 |
| TOMM34    | 0.199606958     | 5.009159278        | 4.931763144  | 4.60E-06 | 8.37E-05         | 3.337358834 |
| RFX1      | 0.251314752     | 3.721508768        | 4.929033941  | 4.65E-06 | 8.45E-05         | 3.41186279  |
| KAT14     | 0.257017454     | 3.726469447        | 4.92795198   | 4.67E-06 | 8.48E-05         | 3.406238029 |
| PTPN14    | -0.554077954    | 6.387033778        | -4.927667037 | 4.68E-06 | 8.48E-05         | 3.292158267 |
| TCF25     | 0.165125798     | 6.966272345        | 4.925155086  | 4.72E-06 | 8.55E-05         | 3.286754505 |
| LRR8C     | -0.586208046    | 2.640381899        | -4.922847921 | 4.76E-06 | 8.61E-05         | 3.605888799 |
| FSCN1     | 0.253044656     | 8.71078901         | 4.922152935  | 4.78E-06 | 8.61E-05         | 3.356847887 |
| RAD21     | -0.158538599    | 6.684411681        | -4.922643021 | 4.77E-06 | 8.61E-05         | 3.273169614 |
| PIP4K2A   | -0.181678534    | 6.495564363        | -4.922431552 | 4.77E-06 | 8.61E-05         | 3.270550918 |
| SRSF2     | 0.249578285     | 5.800198373        | 4.921221034  | 4.79E-06 | 8.63E-05         | 3.267179677 |
| ARHGEF10L | 0.186037249     | 5.046495641        | 4.920047067  | 4.82E-06 | 8.66E-05         | 3.298758119 |
| SMARCD1   | -0.153515371    | 5.586574899        | -4.919302775 | 4.83E-06 | 8.67E-05         | 3.27734774  |

| Gene     | Log fold change | Average Expression | t            | P-value  | Adjusted P-value | B           |
|----------|-----------------|--------------------|--------------|----------|------------------|-------------|
| EPHB4    | 0.193225763     | 6.292327357        | 4.918642517  | 4.84E-06 | 8.68E-05         | 3.255834377 |
| RFXANK   | 0.31175134      | 3.880620562        | 4.917434955  | 4.87E-06 | 8.71E-05         | 3.404854638 |
| CACUL1   | -0.248475321    | 5.114398553        | -4.91556752  | 4.90E-06 | 8.77E-05         | 3.268223339 |
| ABTB2    | 0.341797499     | 3.118089837        | 4.91461339   | 4.92E-06 | 8.79E-05         | 3.419367245 |
| TTC14    | -0.34250162     | 3.373045466        | -4.910272991 | 5.00E-06 | 8.93E-05         | 3.435015206 |
| ADORA2B  | 0.296353825     | 2.509792558        | 4.907466204  | 5.06E-06 | 9.00E-05         | 3.494903049 |
| IFT140   | -0.152336009    | 5.056182142        | -4.907738295 | 5.05E-06 | 9.00E-05         | 3.262120573 |
| ARRDC4   | -0.560094813    | 4.172866516        | -4.906799246 | 5.07E-06 | 9.02E-05         | 3.29406535  |
| HDGFRP2  | 0.295181212     | 6.318456763        | 4.904000417  | 5.13E-06 | 9.10E-05         | 3.201132804 |
| RAP2C    | -0.192096114    | 4.570085976        | -4.903120755 | 5.14E-06 | 9.12E-05         | 3.264166422 |
| FZR1     | -0.15333042     | 5.336701384        | -4.903101787 | 5.14E-06 | 9.12E-05         | 3.217594867 |
| ZXDB     | -0.400048915    | 3.143796067        | -4.89959714  | 5.21E-06 | 9.23E-05         | 3.434976505 |
| LDLRAP1  | 0.207208235     | 4.813476688        | 4.899350182  | 5.22E-06 | 9.23E-05         | 3.240369208 |
| MAGED1   | 0.137481234     | 8.072603753        | 4.898792413  | 5.23E-06 | 9.24E-05         | 3.232147827 |
| C1GALT1  | -0.317947037    | 5.544368065        | -4.894030748 | 5.33E-06 | 9.40E-05         | 3.187646775 |
| GMEB1    | -0.264906794    | 3.882419068        | -4.893379491 | 5.34E-06 | 9.41E-05         | 3.320504529 |
| SYDE2    | -0.656486664    | 0.822354332        | -4.892576679 | 5.36E-06 | 9.43E-05         | 3.797209776 |
| NEU1     | 0.207121104     | 6.179088923        | 4.888548132  | 5.44E-06 | 9.56E-05         | 3.144260464 |
| SLC19A3  | -0.901081396    | -1.412230403       | -4.886383219 | 5.49E-06 | 9.63E-05         | 3.843585024 |
| SYNPO2   | -0.593476257    | 4.932095841        | -4.886324561 | 5.49E-06 | 9.63E-05         | 3.219927165 |
| OSBPL7   | 0.4166246       | 1.54037571         | 4.882430451  | 5.57E-06 | 9.76E-05         | 3.602653892 |
| CHD7     | -0.694648178    | 0.313095976        | -4.877683549 | 5.68E-06 | 9.93E-05         | 3.652255919 |
| FARS2    | -0.248797444    | 3.477805263        | -4.876045809 | 5.71E-06 | 9.98E-05         | 3.30852975  |
| CREM     | 0.228528531     | 3.593687959        | 4.875549066  | 5.72E-06 | 9.99E-05         | 3.260764988 |
| PDLIM5   | -0.511447921    | 5.51750303         | -4.873348617 | 5.77E-06 | 0.000100618      | 3.091332779 |
| MRPL2    | 0.273782762     | 4.176568333        | 4.872933739  | 5.78E-06 | 0.000100663      | 3.184317058 |
| GJA1     | -0.413006171    | 8.197251695        | -4.872443733 | 5.79E-06 | 0.000100737      | 3.131128857 |
| STC1     | -0.518036079    | 3.542155622        | -4.868255369 | 5.89E-06 | 0.000102224      | 3.284674297 |
| PPP1R21  | -0.175138837    | 4.134649469        | -4.868053942 | 5.89E-06 | 0.000102224      | 3.188389284 |
| DKC1     | -0.24429312     | 5.493462168        | -4.865513038 | 5.95E-06 | 0.000103114      | 3.063345124 |
| NACAD    | 0.307235241     | 3.537341547        | 4.8610215    | 6.05E-06 | 0.000104797      | 3.207204375 |
| MYDGF    | 0.20924796      | 6.663510475        | 4.860199357  | 6.07E-06 | 0.000105009      | 3.038323969 |
| USP27X   | -0.317570645    | 2.537054077        | -4.85731965  | 6.14E-06 | 0.000106061      | 3.353880713 |
| EHD1     | -0.235075666    | 7.202123632        | -4.853757156 | 6.22E-06 | 0.000107406      | 3.02241143  |
| OSGEPL1  | 0.32856928      | 1.747334524        | 4.846399552  | 6.40E-06 | 0.000110345      | 3.454271956 |
| SH3RF3   | -0.236821277    | 4.53157013         | -4.846162864 | 6.41E-06 | 0.000110345      | 3.04224646  |
| CARD6    | 0.266901749     | 4.86330035         | 4.842292785  | 6.51E-06 | 0.000111765      | 3.013842196 |
| FKBP4    | 0.247999311     | 5.639054938        | 4.842254136  | 6.51E-06 | 0.000111765      | 2.981378297 |
| VPS33B   | 0.216373404     | 3.279246016        | 4.840186052  | 6.56E-06 | 0.000112531      | 3.15190605  |
| MAP7D3   | -0.17628105     | 5.105172578        | -4.839178806 | 6.58E-06 | 0.00011284       | 3.000830794 |
| ANKRD34A | -0.548406133    | 1.725401346        | -4.838348894 | 6.61E-06 | 0.000113072      | 3.347517068 |
| TIPRL    | -0.147979202    | 5.724023636        | -4.837755338 | 6.62E-06 | 0.000113203      | 2.965496562 |
| KCNJ8    | 0.362967133     | 2.721926012        | 4.835763726  | 6.67E-06 | 0.000113559      | 3.240482859 |
| CRY1     | -0.27832183     | 3.768772653        | -4.836221451 | 6.66E-06 | 0.000113559      | 3.064315341 |
| SLC25A11 | 0.235746408     | 5.103066906        | 4.83633623   | 6.66E-06 | 0.000113559      | 2.989752315 |
| RAB1A    | 0.130336051     | 7.590318183        | 4.835808857  | 6.67E-06 | 0.000113559      | 2.970961357 |
| SUV39H2  | -0.330671228    | 2.765080786        | -4.835415458 | 6.68E-06 | 0.000113583      | 3.189491578 |
| USP32    | -0.378326476    | 5.566734917        | -4.83268746  | 6.75E-06 | 0.000114653      | 2.949594651 |
| ZNF639   | -0.14324431     | 4.696835495        | -4.825651764 | 6.94E-06 | 0.000117271      | 2.979114012 |
| LARP7    | -0.175382929    | 4.916535587        | -4.825662077 | 6.94E-06 | 0.000117271      | 2.955625528 |
| WWP2     | -0.167318101    | 5.477560417        | -4.82622996  | 6.92E-06 | 0.000117271      | 2.925046042 |
| PA2G4    | 0.232606207     | 5.856659021        | 4.825819233  | 6.93E-06 | 0.000117271      | 2.911910649 |
| PGAM1    | 0.157529591     | 4.262173437        | 4.823479396  | 6.99E-06 | 0.000118123      | 2.989260107 |
| SOCS7    | -0.357431871    | 3.328797056        | -4.821933124 | 7.04E-06 | 0.000118694      | 3.066576559 |
| CSNK1G2  | 0.180149554     | 6.492699089        | 4.820437251  | 7.08E-06 | 0.000119246      | 2.887778587 |
| UBIAD1   | -0.178795687    | 3.913843371        | -4.817164221 | 7.17E-06 | 0.000120621      | 3.013856603 |
| TFAP2C   | 0.37957452      | 2.694240977        | 4.815549118  | 7.21E-06 | 0.000121236      | 3.189720269 |
| GCFC2    | -0.240263891    | 3.537444657        | -4.812853367 | 7.29E-06 | 0.000122363      | 3.04749343  |
| SKIL     | -0.330037047    | 4.434777334        | -4.809325766 | 7.39E-06 | 0.000123894      | 2.963060115 |
| HGH1     | 0.217373732     | 4.649972896        | 4.806684196  | 7.46E-06 | 0.000125018      | 2.891958998 |
| PREP     | 0.163936456     | 5.196415207        | 4.805028615  | 7.51E-06 | 0.000125676      | 2.85744941  |
| NECTIN4  | 1.585761715     | -3.371736808       | 4.802499198  | 7.58E-06 | 0.000126761      | 3.471758279 |
| TCP1     | 0.141421049     | 7.349444151        | 4.801736077  | 7.60E-06 | 0.000126992      | 2.835413649 |
| CEP128   | -0.528473988    | 0.765277155        | -4.800844154 | 7.63E-06 | 0.000127181      | 3.426467886 |
| RPAP2    | 0.248707476     | 4.091635692        | 4.800773193  | 7.63E-06 | 0.000127181      | 2.919115482 |
| LAMTOR3  | -0.147623381    | 5.231015097        | -4.800100826 | 7.65E-06 | 0.000127368      | 2.839911556 |
| IL12A    | 0.809631072     | -1.299688675       | 4.797919338  | 7.72E-06 | 0.000128297      | 3.531844619 |
| TBC1D25  | -0.176023347    | 4.002444183        | -4.794685317 | 7.81E-06 | 0.00012947       | 2.917183088 |
| KLHL12   | 0.161118467     | 4.599746151        | 4.794767236  | 7.81E-06 | 0.00012947       | 2.864857212 |
| CRK      | -0.224773121    | 6.680729383        | -4.795089028 | 7.80E-06 | 0.00012947       | 2.796058485 |

| Gene     | Log fold change | Average Expression | t            | P-value  | Adjusted P-value | B           |
|----------|-----------------|--------------------|--------------|----------|------------------|-------------|
| ETV5     | -0.325378823    | 5.039797635        | -4.791441922 | 7.91E-06 | 0.000130947      | 2.815633115 |
| DCAF17   | -0.285629369    | 3.617658571        | -4.788777465 | 7.99E-06 | 0.000132046      | 2.952901562 |
| RBM5     | 0.332086684     | 4.582961735        | 4.788690212  | 7.99E-06 | 0.000132046      | 2.863430244 |
| TWISTNB  | -0.422315926    | 4.149839235        | -4.786230535 | 8.07E-06 | 0.000133151      | 2.877270787 |
| PRMT9    | 0.259657082     | 2.537940735        | 4.784627008  | 8.12E-06 | 0.000133825      | 3.057582803 |
| SUSD6    | 0.301961367     | 4.48969887         | 4.783455691  | 8.16E-06 | 0.00013428       | 2.833303795 |
| ENOX2    | -0.172862399    | 4.325429542        | -4.782851051 | 8.18E-06 | 0.000134444      | 2.841609955 |
| ARHGAP10 | 0.242398943     | 5.192340943        | 4.781435105  | 8.22E-06 | 0.000135028      | 2.767542806 |
| ARMCX2   | 0.168688368     | 6.10288627         | 4.779008058  | 8.30E-06 | 0.000136141      | 2.734232304 |
| RNF182   | -0.650478226    | 0.460033987        | -4.775917056 | 8.40E-06 | 0.000137612      | 3.381263517 |
| ALPK1    | -0.267532258    | 3.877307704        | -4.774871534 | 8.43E-06 | 0.000138014      | 2.883609553 |
| MKI67    | -0.605731728    | 4.849061925        | -4.770325776 | 8.58E-06 | 0.000140284      | 2.764928963 |
| JMJD6    | -0.401107208    | 4.369266347        | -4.768197588 | 8.65E-06 | 0.000141277      | 2.841693269 |
| C2orf69  | -0.252645842    | 4.739995909        | -4.765341632 | 8.74E-06 | 0.000142675      | 2.743438813 |
| FIGNL1   | -0.353745348    | 2.316710624        | -4.763950165 | 8.79E-06 | 0.000143281      | 3.074895773 |
| ZFP2     | 0.696406647     | -0.631515057       | 4.760764985  | 8.90E-06 | 0.000144488      | 3.367906063 |
| MIS12    | -0.23247354     | 3.776767353        | -4.759735447 | 8.93E-06 | 0.000145294      | 2.811578297 |
| BTG1     | 0.236732123     | 6.794363827        | 4.757158571  | 9.02E-06 | 0.000146574      | 2.656714134 |
| TESK2    | 0.377953061     | 1.521625108        | 4.75655267   | 9.07E-06 | 0.000147101      | 3.143918657 |
| NFIB     | -0.378569539    | 4.516170979        | -4.755734602 | 9.07E-06 | 0.000147101      | 2.730949263 |
| KLHDC1   | 0.497982815     | 0.626942896        | 4.753748161  | 9.14E-06 | 0.000147858      | 3.272919504 |
| RNF139   | -0.196125534    | 5.456104894        | -4.753967277 | 9.13E-06 | 0.000147858      | 2.666810949 |
| FAM136A  | 0.168748871     | 4.758417162        | 4.753160924  | 9.16E-06 | 0.000148032      | 2.693659258 |
| HOMER1   | -0.488381026    | 2.313763299        | -4.751931602 | 9.20E-06 | 0.000148569      | 2.938825703 |
| TTC7A    | 0.196092882     | 5.419718498        | 4.75159997   | 9.21E-06 | 0.000148598      | 2.64080051  |
| UFSP2    | 0.167303899     | 4.373292972        | 4.750469579  | 9.25E-06 | 0.000148922      | 2.722091974 |
| TOR3A    | 0.168259759     | 4.77197474         | 4.75049516   | 9.25E-06 | 0.000148922      | 2.686310265 |
| COBLL1   | 0.474653853     | 3.812922996        | 4.749815277  | 9.28E-06 | 0.000149135      | 2.745304563 |
| ZFHX2    | 0.506088906     | 0.566619232        | 4.749073755  | 9.30E-06 | 0.00014924       | 3.17651616  |
| MICALL2  | 0.424801732     | 3.966483063        | 4.749208709  | 9.30E-06 | 0.00014924       | 2.790234402 |
| BCL2L13  | 0.142537872     | 5.734815929        | 4.747520142  | 9.36E-06 | 0.000149968      | 2.626844177 |
| ZNF542P  | -0.30960876     | 2.900199118        | -4.746470001 | 9.40E-06 | 0.00015041       | 2.867620018 |
| KAT5     | -0.167043236    | 4.366403128        | -4.742990785 | 9.52E-06 | 0.000152098      | 2.694520714 |
| ELK4     | -0.269810747    | 5.430342609        | -4.743183872 | 9.51E-06 | 0.000152098      | 2.619915734 |
| NUP35    | -0.321020953    | 2.40407387         | -4.740088044 | 9.63E-06 | 0.000153629      | 2.944371779 |
| TRMT12   | -0.224508774    | 3.284047589        | -4.736041359 | 9.78E-06 | 0.000155854      | 2.787893009 |
| TICRR    | -0.557748659    | 0.834241833        | -4.734188836 | 9.85E-06 | 0.000156793      | 3.112968258 |
| AP5Z1    | 0.194470322     | 5.424633145        | 4.732528024  | 9.91E-06 | 0.000157622      | 2.578258162 |
| USP20    | 0.181819608     | 4.269455515        | 4.73090095   | 9.97E-06 | 0.000158436      | 2.649353749 |
| SLC43A1  | 0.270318387     | 5.143887895        | 4.730381344  | 9.99E-06 | 0.000158582      | 2.586610721 |
| RAB32    | -0.18523099     | 6.104218277        | -4.728911002 | 1.00E-05 | 0.000159306      | 2.551523972 |
| PSPH     | -0.228427929    | 3.635333007        | -4.728097849 | 1.01E-05 | 0.000159632      | 2.72514791  |
| TCF12    | -0.313236346    | 6.687911214        | -4.725608496 | 1.02E-05 | 0.000160984      | 2.536921917 |
| CCT4     | 0.112810124     | 7.480936256        | 4.725310376  | 1.02E-05 | 0.000160998      | 2.557055979 |
| DIAPH2   | -0.2273064      | 4.896775412        | -4.724146237 | 1.02E-05 | 0.00016152       | 2.573289551 |
| RPF2     | -0.162142702    | 5.311659101        | -4.723910333 | 1.02E-05 | 0.00016152       | 2.551221958 |
| CEP131   | 0.399148853     | 3.092239795        | 4.719745453  | 1.04E-05 | 0.000163759      | 2.79559741  |
| INPPL1   | 0.183727463     | 6.102900878        | 4.720016477  | 1.04E-05 | 0.000163759      | 2.520562381 |
| ARF6     | -0.198321786    | 6.576744563        | -4.717586664 | 1.05E-05 | 0.000164938      | 2.507267433 |
| METAP1D  | -0.264087086    | 2.506577814        | -4.717286938 | 1.05E-05 | 0.000164955      | 2.857715928 |
| PRELID3B | -0.18328056     | 5.026968209        | -4.714864797 | 1.06E-05 | 0.000166309      | 2.537301133 |
| CREBZF   | -0.409818004    | 3.287571038        | -4.711517839 | 1.07E-05 | 0.000168265      | 2.665875123 |
| CCT7     | 0.172339171     | 7.621543462        | 4.711082882  | 1.08E-05 | 0.000168369      | 2.509300253 |
| MFS2A    | -0.812870795    | 1.234575099        | -4.704771763 | 1.10E-05 | 0.000172101      | 3.105431579 |
| GATAD2B  | -0.233338863    | 4.585623012        | -4.704898356 | 1.10E-05 | 0.000172101      | 2.50332578  |
| IFIT5    | -0.190995812    | 5.293657265        | -4.7038065   | 1.11E-05 | 0.000172554      | 2.481988069 |
| AP3M2    | -0.264193928    | 2.934245384        | -4.703503219 | 1.11E-05 | 0.000172574      | 2.686199608 |
| URB2     | -0.602169718    | 3.619618995        | -4.702799246 | 1.11E-05 | 0.000172858      | 2.645434006 |
| BCKDK    | 0.205298084     | 5.512009376        | 4.700478678  | 1.12E-05 | 0.000174209      | 2.461225929 |
| SLC35A5  | -0.205063807    | 5.087413857        | -4.697326037 | 1.13E-05 | 0.000176126      | 2.468719286 |
| SH3PXD2B | -0.369922565    | 8.009816068        | -4.694344144 | 1.15E-05 | 0.000177949      | 2.47367599  |
| SEC14L1  | -0.163584108    | 5.957519167        | -4.693058633 | 1.15E-05 | 0.000178635      | 2.417406611 |
| CCDC34   | 0.271013707     | 3.224456663        | 4.691874589  | 1.16E-05 | 0.000179256      | 2.637604685 |
| CRY2     | -0.255021422    | 4.576926977        | -4.686314456 | 1.18E-05 | 0.000182891      | 2.470304305 |
| TBC1D19  | -0.234949108    | 3.220573574        | -4.684130535 | 1.19E-05 | 0.000184223      | 2.62728296  |
| BAG1     | 0.264707218     | 5.768153532        | 4.68280941   | 1.20E-05 | 0.000184959      | 2.385522301 |
| TBC1D23  | -0.294822728    | 5.309770981        | -4.682389435 | 1.20E-05 | 0.000185064      | 2.396938466 |
| DYRK1B   | 0.261296767     | 4.087965791        | 4.680842623  | 1.21E-05 | 0.000185962      | 2.465369505 |
| CCDC85B  | 0.432245833     | 6.94206842         | 4.680217791  | 1.21E-05 | 0.000186213      | 2.371223467 |
| EXOC6B   | -0.268580881    | 5.194681598        | -4.679425137 | 1.21E-05 | 0.000186583      | 2.39493406  |

| Gene       | Log fold change | Average Expression | t            | P-value  | Adjusted P-value | B           |
|------------|-----------------|--------------------|--------------|----------|------------------|-------------|
| PTPN13     | -0.303707959    | 6.833740535        | -4.677804875 | 1.22E-05 | 0.000187541      | 2.363953322 |
| YBX3       | 0.221035622     | 8.427965335        | 4.677220395  | 1.22E-05 | 0.000187765      | 2.421397556 |
| PITHD1     | 0.221412385     | 4.953223653        | 4.676374241  | 1.23E-05 | 0.000188177      | 2.400854349 |
| SHROOM4    | 0.572809899     | 1.326717819        | 4.672168411  | 1.25E-05 | 0.000191006      | 2.813592941 |
| ZNF843     | 0.400568038     | 1.165968751        | 4.668275983  | 1.26E-05 | 0.000193646      | 2.834829642 |
| ZNF584     | -0.247000279    | 3.594916629        | -4.66719396  | 1.27E-05 | 0.000193791      | 2.474669142 |
| FAM102B    | -0.346795478    | 4.725748207        | -4.667007883 | 1.27E-05 | 0.000193791      | 2.387677184 |
| KLF13      | -0.390779494    | 6.748194258        | -4.667504553 | 1.27E-05 | 0.000193791      | 2.328246076 |
| ZFP36      | 0.583914956     | 6.422503888        | 4.667376133  | 1.27E-05 | 0.000193791      | 2.326937284 |
| ZDHHC8     | 0.14125792      | 5.922642323        | 4.661498571  | 1.30E-05 | 0.000197675      | 2.305608376 |
| SOX8       | -1.097365731    | -0.510047906       | -4.660956853 | 1.30E-05 | 0.000197881      | 3.029951165 |
| MTO1       | 0.194387015     | 4.091398572        | 4.660634943  | 1.30E-05 | 0.000197922      | 2.400640169 |
| TEAD4      | -0.331309643    | 3.580425489        | -4.658448913 | 1.31E-05 | 0.000199365      | 2.468152049 |
| BOLA3-AS1  | 0.363315876     | 1.389448032        | 4.651896753  | 1.35E-05 | 0.000203787      | 2.740073758 |
| BCF3       | 0.148349169     | 5.711367533        | 4.651890725  | 1.35E-05 | 0.000203787      | 2.270853459 |
| ATP1B3     | 0.132253835     | 6.467787381        | 4.651850607  | 1.35E-05 | 0.000203787      | 2.265043955 |
| G0S2       | -0.688420726    | 1.688798662        | -4.64902134  | 1.36E-05 | 0.000205771      | 2.682780464 |
| ZNF710     | -0.312134204    | 3.118340092        | -4.647928075 | 1.37E-05 | 0.000206416      | 2.458016607 |
| CCDC91     | -0.173715493    | 4.149659278        | -4.644301347 | 1.39E-05 | 0.000209055      | 2.358341242 |
| PNRC1      | 0.24251043      | 6.351458449        | 4.642673908  | 1.39E-05 | 0.000210133      | 2.231461844 |
| HNRNPBK    | 0.113398695     | 8.373261462        | 4.641610375  | 1.40E-05 | 0.000210768      | 2.297803669 |
| APOBEC3G   | 0.379781398     | 2.408273822        | 4.639663669  | 1.41E-05 | 0.000212111      | 2.590906728 |
| NOL4L      | -0.267728726    | 3.283901799        | -4.635486212 | 1.43E-05 | 0.000215268      | 2.35480463  |
| RANBP1     | 0.167771377     | 4.415466222        | 4.633213939  | 1.44E-05 | 0.000216906      | 2.274394462 |
| PPP4R1     | -0.338810982    | 5.69961015         | -4.6318491   | 1.45E-05 | 0.000217808      | 2.200249241 |
| NNMT       | -0.305084069    | 8.739822523        | -4.630179739 | 1.46E-05 | 0.000218966      | 2.251046001 |
| RAB11FIP4  | 0.541560706     | 1.170652976        | 4.627511986  | 1.48E-05 | 0.000220742      | 2.720255472 |
| TSPYL4     | -0.280705506    | 4.680265176        | -4.627716732 | 1.47E-05 | 0.000220742      | 2.231797318 |
| C12orf45   | 0.384325471     | 3.008769857        | 4.626567949  | 1.48E-05 | 0.000221309      | 2.429501003 |
| U2AF2      | 0.142827681     | 6.976453233        | 4.624526823  | 1.49E-05 | 0.000222798      | 2.173021397 |
| HSDL1      | -0.209107813    | 4.146225073        | -4.623841278 | 1.50E-05 | 0.000223153      | 2.265132963 |
| PELI2      | 0.378403138     | 3.372986083        | 4.62207473   | 1.51E-05 | 0.000224247      | 2.400125092 |
| SLC27A1    | 0.15315947      | 5.667226714        | 4.622019042  | 1.51E-05 | 0.000224247      | 2.168669923 |
| MTSS1L     | -0.293866734    | 6.369706764        | -4.621669376 | 1.51E-05 | 0.000224321      | 2.155170192 |
| SHB        | -0.358097626    | 2.379781588        | -4.62092053  | 1.51E-05 | 0.000224734      | 2.508256699 |
| PRKD2      | 0.187412686     | 4.668302801        | 4.617469644  | 1.53E-05 | 0.000227451      | 2.187242812 |
| PBRM1      | -0.341078676    | 5.943743675        | -4.613069203 | 1.56E-05 | 0.000231024      | 2.129603406 |
| ATAD3A     | 0.242845919     | 4.426195674        | 4.612433593  | 1.56E-05 | 0.00023135       | 2.192495281 |
| WIPF1      | -0.236936004    | 6.825158531        | -4.611809709 | 1.57E-05 | 0.000231666      | 2.120235585 |
| ZNF346     | 0.191948637     | 3.178793408        | 4.610616844  | 1.57E-05 | 0.000232253      | 2.331897438 |
| RABIF      | -0.192800308    | 3.767015032        | -4.610806353 | 1.57E-05 | 0.000232253      | 2.275926662 |
| FTSJ1      | 0.154816103     | 5.010764771        | 4.610244731  | 1.57E-05 | 0.000232351      | 2.150363969 |
| TMUB1      | 0.298008721     | 4.547735852        | 4.609822391  | 1.58E-05 | 0.000232493      | 2.193533838 |
| MED29      | 0.154788159     | 6.188227727        | 4.608530239  | 1.59E-05 | 0.000233398      | 2.107744864 |
| STIP1      | 0.172890244     | 7.143542889        | 4.607047536  | 1.59E-05 | 0.000234475      | 2.113650837 |
| GNA13      | -0.374521539    | 5.840941588        | -4.605313631 | 1.60E-05 | 0.000235779      | 2.098149428 |
| LMNB1      | -0.421833188    | 3.308811724        | -4.604943466 | 1.61E-05 | 0.000235878      | 2.290167309 |
| KENP1      | 0.182750861     | 6.327611378        | 4.601298845  | 1.63E-05 | 0.000238901      | 2.080866514 |
| MOSPD1     | 0.251618875     | 3.921414029        | 4.60071792   | 1.63E-05 | 0.00023919       | 2.208234827 |
| TRMT1L     | 0.263071373     | 3.999700328        | 4.600436615  | 1.63E-05 | 0.000239211      | 2.1536827   |
| CLCN2      | 0.507511633     | 0.556052139        | 4.597938943  | 1.65E-05 | 0.000241053      | 2.691429719 |
| PAOX       | 0.343971592     | 1.682053499        | 4.59788025   | 1.65E-05 | 0.000241053      | 2.521756592 |
| CENPE      | -0.460687818    | 2.42227836         | -4.595374667 | 1.67E-05 | 0.000243098      | 2.43543142  |
| CARMIL1    | -0.329289713    | 3.254570003        | -4.592827063 | 1.68E-05 | 0.000244962      | 2.24262804  |
| FOS        | 1.415946829     | 5.295860894        | 4.592856819  | 1.68E-05 | 0.000244962      | 2.102309    |
| MED25      | 0.208412763     | 4.946566717        | 4.59253372   | 1.68E-05 | 0.000244995      | 2.099946658 |
| PI4K2A     | -0.189239061    | 5.977470258        | -4.592274852 | 1.68E-05 | 0.000244997      | 2.049751788 |
| CBX5       | -0.225460292    | 6.525932197        | -4.591012985 | 1.69E-05 | 0.000245924      | 2.043790151 |
| SLTM       | -0.180750781    | 5.472935436        | -4.588398539 | 1.71E-05 | 0.000248111      | 2.051133348 |
| AAMP       | 0.21689077      | 6.180086521        | 4.587144134  | 1.72E-05 | 0.000249043      | 2.030310242 |
| SMG6       | 0.343232662     | 5.2030081          | 4.584800383  | 1.73E-05 | 0.000251003      | 2.04405758  |
| TOLLIP-AS1 | 0.72865442      | -1.108287628       | 4.582268954  | 1.75E-05 | 0.000252913      | 2.771965262 |
| TRDMT1     | -0.263157193    | 2.474244428        | -4.582284647 | 1.75E-05 | 0.000252913      | 2.34513188  |
| EIF4ENIF1  | -0.263814046    | 4.348288526        | -4.580085527 | 1.76E-05 | 0.000254749      | 2.077329007 |
| ETS1       | -0.359194471    | 6.103241171        | -4.577720524 | 1.78E-05 | 0.000256774      | 2.005427063 |
| ZADH2      | -0.215805754    | 4.528999418        | -4.576184577 | 1.79E-05 | 0.00025801       | 2.044338705 |
| TNFRSF12A  | -0.482964735    | 6.06408896         | -4.573601028 | 1.81E-05 | 0.000260024      | 1.99637171  |
| OSBPL5     | 0.193633761     | 5.922964281        | 4.573780427  | 1.81E-05 | 0.000260024      | 1.9861418   |
| CDR2       | -0.180501793    | 5.775345281        | -4.573057956 | 1.81E-05 | 0.000260286      | 1.997779088 |
| TCF20      | -0.264100488    | 5.287808616        | -4.572823969 | 1.81E-05 | 0.000260286      | 1.993681607 |

| Gene     | Log fold change | Average Expression | t            | P-value  | Adjusted P-value | B           |
|----------|-----------------|--------------------|--------------|----------|------------------|-------------|
| SH2B2    | -0.448769948    | 1.939205095        | -4.571334303 | 1.82E-05 | 0.000260885      | 2.36775821  |
| ECT2     | -0.498230553    | 3.420371016        | -4.571442286 | 1.82E-05 | 0.000260885      | 2.17687573  |
| PLCL2    | 0.350743679     | 3.926483013        | 4.571885559  | 1.82E-05 | 0.000260885      | 2.094409273 |
| TRMT10C  | -0.214664058    | 4.573374928        | -4.571196088 | 1.82E-05 | 0.000260885      | 2.062225024 |
| CPSF7    | -0.222840924    | 6.007773989        | -4.570681987 | 1.83E-05 | 0.00026114       | 1.974067619 |
| CPT2     | 0.270844637     | 2.309152066        | 4.570024498  | 1.83E-05 | 0.000261536      | 2.277676565 |
| C5orf24  | -0.299774453    | 5.657242905        | -4.568251018 | 1.84E-05 | 0.000263031      | 1.969256297 |
| PANK1    | 0.376856183     | 2.497608233        | 4.567718744  | 1.85E-05 | 0.000263307      | 2.150729262 |
| KIAA1958 | -0.413946911    | 2.569847404        | -4.5660596   | 1.86E-05 | 0.000264698      | 2.290169581 |
| MIEF2    | -0.227085457    | 2.934980279        | -4.563024243 | 1.88E-05 | 0.000267472      | 2.158022611 |
| TACO1    | 0.227317572     | 4.176246346        | 4.562029469  | 1.89E-05 | 0.000268218      | 2.04117497  |
| ATMIN    | -0.139114549    | 6.299980029        | -4.56042925  | 1.90E-05 | 0.000269575      | 1.932351942 |
| PDCD1LG2 | -0.315494538    | 3.443938333        | -4.559527257 | 1.91E-05 | 0.000270233      | 2.105698181 |
| POLR2A   | 0.224836688     | 7.800904758        | 4.558961973  | 1.91E-05 | 0.000270304      | 1.969004734 |
| NFKB1    | -0.264003293    | 6.041470767        | -4.558954397 | 1.91E-05 | 0.000270304      | 1.927695715 |
| PDSS2    | -0.232272364    | 3.87787076         | -4.557533068 | 1.92E-05 | 0.000271491      | 2.073532056 |
| ETV1     | -0.588364646    | 5.020864707        | -4.556956191 | 1.92E-05 | 0.000271567      | 1.967375391 |
| XXYL1    | 0.169548338     | 5.328633658        | 4.556978898  | 1.92E-05 | 0.000271567      | 1.943774285 |
| LARP4B   | -0.260043056    | 5.082449967        | -4.552112247 | 1.96E-05 | 0.000276276      | 1.931529752 |
| RPUSD3   | 0.319224812     | 3.567499787        | 4.548975111  | 1.98E-05 | 0.000279275      | 2.073077498 |
| STX2     | -0.181317167    | 4.896285176        | -4.545480444 | 2.01E-05 | 0.000282684      | 1.927227653 |
| EZR      | 0.237553114     | 4.786240728        | 4.539897746  | 2.05E-05 | 0.0002882        | 1.910229837 |
| YWHAG    | -0.243940538    | 7.748982635        | -4.539809125 | 2.05E-05 | 0.0002882        | 1.891781913 |
| PHF20    | -0.378942443    | 5.158402586        | -4.539548736 | 2.05E-05 | 0.000288212      | 1.887602419 |
| HNMT     | -0.211408198    | 4.908326028        | -4.538415537 | 2.06E-05 | 0.000289165      | 1.908765395 |
| SSSCA1   | 0.253657467     | 3.801978222        | 4.537578507  | 2.07E-05 | 0.000289801      | 1.994548059 |
| ZNF26    | -0.300388951    | 2.644310353        | -4.53329189  | 2.10E-05 | 0.000294203      | 2.157704725 |
| XYLT2    | 0.227255652     | 4.736358876        | 4.532774862  | 2.11E-05 | 0.000294498      | 1.883554871 |
| CDC42EP4 | 0.227748125     | 5.93872219         | 4.526461198  | 2.16E-05 | 0.000301239      | 1.812065295 |
| SPATA13  | -0.313323673    | 3.876472371        | -4.524328484 | 2.17E-05 | 0.000303364      | 1.928321662 |
| EIF3B    | 0.129055585     | 7.872466218        | 4.523094818  | 2.18E-05 | 0.00030448       | 1.843156378 |
| SEC13    | 0.187043322     | 7.107981143        | 4.520015203  | 2.21E-05 | 0.000307712      | 1.797438847 |
| MRPS26   | 0.335948046     | 4.395126871        | 4.518170605  | 2.22E-05 | 0.000309548      | 1.851899096 |
| TOB2     | -0.393283306    | 6.217899311        | -4.51748204  | 2.23E-05 | 0.000310057      | 1.778193088 |
| EIF6     | 0.236338301     | 5.825795846        | 4.515492079  | 2.25E-05 | 0.000312077      | 1.777040162 |
| LRRC6    | -0.285203187    | 1.644741979        | -4.514958341 | 2.25E-05 | 0.00031241       | 2.267926446 |
| MAD2L2   | 0.290249617     | 4.65037539         | 4.513804609  | 2.26E-05 | 0.000313412      | 1.83398445  |
| CHSY1    | -0.339624129    | 5.739827884        | -4.513603964 | 2.26E-05 | 0.000313412      | 1.777344379 |
| DCUN1D4  | -0.232875753    | 4.840408347        | -4.512886579 | 2.27E-05 | 0.000313962      | 1.803420432 |
| DNM2     | 0.123129057     | 6.598203373        | 4.512582383  | 2.27E-05 | 0.000314029      | 1.760513023 |
| RAB3D    | -0.303199348    | 2.009851896        | -4.509667991 | 2.29E-05 | 0.000316842      | 2.108840752 |
| NAPG     | -0.213963212    | 3.779086621        | -4.509571759 | 2.30E-05 | 0.000316842      | 1.906600026 |
| STAT2    | -0.242524005    | 6.916260039        | -4.509449496 | 2.30E-05 | 0.000316842      | 1.750941737 |
| TRMT6    | -0.199531531    | 3.625830464        | -4.508231137 | 2.31E-05 | 0.000317991      | 1.937685265 |
| TAF1B    | -0.231332423    | 3.600098847        | -4.507573696 | 2.31E-05 | 0.000318479      | 1.921193872 |
| MFSD4A   | 1.336570765     | -3.010213319       | 4.506003863  | 2.33E-05 | 0.000320053      | 2.484527444 |
| TRIM35   | 0.195211228     | 4.745762943        | 4.500711071  | 2.37E-05 | 0.000326068      | 1.762180805 |
| NLRP1    | 0.17052384      | 4.995874754        | 4.500509476  | 2.37E-05 | 0.000326068      | 1.760991374 |
| KCNJ15   | -0.310625912    | 3.214059481        | -4.499850148 | 2.38E-05 | 0.000326081      | 1.963533093 |
| EIF5     | -0.329982064    | 7.200811647        | -4.499811908 | 2.38E-05 | 0.000326081      | 1.734804374 |
| APOL2    | 0.233080531     | 5.502636902        | 4.499764375  | 2.38E-05 | 0.000326081      | 1.72135325  |
| UBE2F    | -0.152784308    | 3.920904371        | -4.49925022  | 2.39E-05 | 0.000326408      | 1.854439429 |
| CLIP1    | -0.406050073    | 6.734265497        | -4.493761817 | 2.43E-05 | 0.000332835      | 1.696050128 |
| ULK1     | 0.209280947     | 5.493694662        | 4.491826237  | 2.45E-05 | 0.000334934      | 1.710211268 |
| ZFP30    | -0.393829055    | 2.578094895        | -4.491274028 | 2.46E-05 | 0.000335318      | 1.911894209 |
| RAB27A   | -0.232781363    | 4.563711705        | -4.489635845 | 2.47E-05 | 0.00033706       | 1.747676809 |
| GOT1     | -0.259167961    | 5.087643078        | -4.48891051  | 2.48E-05 | 0.000337664      | 1.717471567 |
| MAP4K4   | 0.163633105     | 9.396904448        | 4.487806217  | 2.49E-05 | 0.000338745      | 1.789935998 |
| SFR      | -0.250333415    | 5.688321914        | -4.486343002 | 2.50E-05 | 0.000340284      | 1.707142591 |
| IDH2     | 0.211689283     | 5.363452337        | 4.484676588  | 2.52E-05 | 0.000341779      | 1.683668419 |
| ABI2     | -0.13959438     | 5.461755579        | -4.484768121 | 2.52E-05 | 0.000341779      | 1.677855962 |
| CIR1     | 0.201944921     | 5.297025115        | 4.483920579  | 2.53E-05 | 0.000342431      | 1.681321947 |
| HSPA6    | 1.197747954     | -2.915794262       | 4.483289624  | 2.53E-05 | 0.000342926      | 2.410062168 |
| KIAA1109 | -0.458175432    | 5.430957883        | -4.482292858 | 2.54E-05 | 0.000343888      | 1.675221485 |
| ARHGEF6  | -0.229181228    | 4.944442994        | -4.481943445 | 2.54E-05 | 0.000344025      | 1.698686149 |
| BRF1     | 0.200169543     | 4.718201846        | 4.481581168  | 2.55E-05 | 0.000344179      | 1.713116396 |
| USP10    | -0.26571987     | 5.554497513        | -4.480422247 | 2.56E-05 | 0.000345353      | 1.652627939 |
| ODF2L    | -0.194092277    | 4.121733651        | -4.480067024 | 2.56E-05 | 0.000345499      | 1.768007872 |
| APEX2    | 0.184010308     | 4.288411392        | 4.479013545  | 2.57E-05 | 0.000346542      | 1.725055452 |
| SEPT5    | 0.233702869     | 4.539338269        | 4.477545485  | 2.59E-05 | 0.000348123      | 1.710289233 |



| Gene       | Log fold change | Average Expression | t            | P-value  | Adjusted P-value | B           |
|------------|-----------------|--------------------|--------------|----------|------------------|-------------|
| FMNL3      | 0.174009847     | 5.019458685        | 4.476367009  | 2.60E-05 | 0.000349336      | 1.659024124 |
| SRPRA      | 0.103191091     | 7.521943679        | 4.474166524  | 2.62E-05 | 0.000351885      | 1.647980179 |
| TMEM216    | 0.213822211     | 3.416335662        | 4.471228064  | 2.65E-05 | 0.000355414      | 1.811159784 |
| GAREM2     | 0.222903966     | 3.417955551        | 4.470994681  | 2.65E-05 | 0.000355414      | 1.794796391 |
| C12orf29   | -0.21339774     | 3.707494347        | -4.470189638 | 2.66E-05 | 0.000356159      | 1.768069245 |
| GNL3       | -0.254144999    | 5.852258361        | -4.469461989 | 2.66E-05 | 0.000356804      | 1.607552128 |
| C19orf25   | 0.214894144     | 3.626277342        | 4.46921182   | 2.67E-05 | 0.000356818      | 1.761849962 |
| CSTF1      | -0.148988433    | 4.762728841        | -4.468447617 | 2.67E-05 | 0.000357512      | 1.661261331 |
| SDF2L1     | 0.274243048     | 3.443700475        | 4.466088432  | 2.70E-05 | 0.000360332      | 1.786285063 |
| ELF4       | -0.293378956    | 5.821034394        | -4.465579991 | 2.70E-05 | 0.000360691      | 1.595544251 |
| LFNG       | -0.870292169    | 2.359853396        | -4.463333264 | 2.73E-05 | 0.000362422      | 1.959850243 |
| PAN2       | -0.25096915     | 2.813105424        | -4.463721027 | 2.72E-05 | 0.000362422      | 1.881741248 |
| CDC25B     | -0.242742352    | 7.025777452        | -4.463543804 | 2.72E-05 | 0.000362422      | 1.59984908  |
| YKT6       | 0.102673231     | 7.034687745        | 4.463812069  | 2.72E-05 | 0.000362422      | 1.595660128 |
| SGMS2      | -0.618355549    | 5.100412531        | -4.463084173 | 2.73E-05 | 0.000362437      | 1.618716349 |
| NCBP3      | -0.204686422    | 4.854833033        | -4.462490714 | 2.73E-05 | 0.000362914      | 1.646428988 |
| RPS6KA1    | 0.484982285     | 0.379179437        | 4.458692565  | 2.77E-05 | 0.00036773       | 2.154029432 |
| PAXIP1-AS2 | -0.343769334    | 1.931201846        | -4.457421186 | 2.79E-05 | 0.000368895      | 2.005786575 |
| MCMBP      | -0.194987716    | 5.982667319        | -4.457362998 | 2.79E-05 | 0.000368895      | 1.563294906 |
| GDPGP1     | 0.380946657     | 0.662493425        | 4.452834335  | 2.83E-05 | 0.0003748        | 2.096489454 |
| MAP9       | -0.415212871    | 3.284135657        | -4.45032822  | 2.86E-05 | 0.000377959      | 1.760039004 |
| QKI        | -0.242467887    | 7.219208595        | -4.449992228 | 2.86E-05 | 0.000378088      | 1.552720036 |
| IL1R1      | -0.277547055    | 9.240111281        | -4.449242499 | 2.87E-05 | 0.000378153      | 1.643451496 |
| NUP93      | 0.152213309     | 5.097048503        | 4.449408362  | 2.87E-05 | 0.000378153      | 1.565572689 |
| ADRM1      | 0.253452193     | 5.999633909        | 4.4496833    | 2.87E-05 | 0.000378153      | 1.537552634 |
| RNF38      | -0.331028281    | 4.453090313        | -4.447724032 | 2.89E-05 | 0.00037995       | 1.600507127 |
| OPA3       | -0.271200393    | 4.615059307        | -4.446504142 | 2.90E-05 | 0.000381335      | 1.586290794 |
| RGS4       | -0.510902697    | 4.915745894        | -4.444574949 | 2.92E-05 | 0.000383729      | 1.597200484 |
| TAX1BP3    | 0.229480262     | 4.68262904         | 4.444117351  | 2.93E-05 | 0.000384044      | 1.577774782 |
| ARMC5      | 0.278235736     | 3.825049993        | 4.443019028  | 2.94E-05 | 0.00038527       | 1.719767927 |
| NLRX1      | 0.192014936     | 4.660294321        | 4.442367757  | 2.95E-05 | 0.000385863      | 1.573407538 |
| RETSAT     | 0.144518912     | 5.984234506        | 4.441623799  | 2.95E-05 | 0.000386589      | 1.510541506 |
| NUDCD1     | -0.243519549    | 3.611852437        | -4.440508156 | 2.97E-05 | 0.000387849      | 1.651876542 |
| VPS8       | -0.172517734    | 5.310319636        | -4.44013567  | 2.97E-05 | 0.000388046      | 1.533245893 |
| TMCO6      | 0.327658414     | 1.726678436        | 4.437932172  | 2.99E-05 | 0.00039054       | 1.95325062  |
| CCDC28B    | 0.367499406     | 2.225801655        | 4.438009691  | 2.99E-05 | 0.00039054       | 1.887007154 |
| ANKRD13C   | -0.205872484    | 5.02597667         | -4.436147619 | 3.01E-05 | 0.000392782      | 1.52659061  |
| LOXL1      | 0.235810147     | 7.685087268        | 4.435846057  | 3.02E-05 | 0.00039288       | 1.516524668 |
| EHMT2      | 0.21057269      | 5.895375297        | 4.435575561  | 3.02E-05 | 0.000392933      | 1.489917532 |
| CEP85      | -0.343316556    | 1.97111822         | -4.434233406 | 3.04E-05 | 0.000394544      | 1.809560837 |
| ZNF136     | -0.219712741    | 2.64367285         | -4.430437458 | 3.08E-05 | 0.000399766      | 1.786490565 |
| SIAH2      | -0.185447869    | 4.965326035        | -4.429120889 | 3.09E-05 | 0.000401367      | 1.508761646 |
| CSGALNACT2 | -0.425670689    | 5.002651203        | -4.42784161  | 3.11E-05 | 0.000402918      | 1.513595986 |
| JADE2      | -0.288774775    | 5.012797156        | -4.426458807 | 3.12E-05 | 0.000404631      | 1.475870988 |
| KLF11      | -0.3558503      | 4.000951792        | -4.425351528 | 3.14E-05 | 0.000405589      | 1.608521183 |
| GALNT15    | -0.406402829    | 5.807921695        | -4.425395664 | 3.14E-05 | 0.000405589      | 1.473568075 |
| CTDSP2     | -0.291379689    | 8.313114621        | -4.42244111  | 3.17E-05 | 0.000409613      | 1.494497607 |
| NAA15      | -0.34788284     | 5.347745619        | -4.421701007 | 3.18E-05 | 0.000410381      | 1.452566835 |
| GLIS1      | 0.480002277     | 1.759228295        | 4.419195006  | 3.21E-05 | 0.00041348       | 1.912633703 |
| PSMD2      | 0.109217684     | 7.615390256        | 4.419224595  | 3.21E-05 | 0.00041348       | 1.454978603 |
| GMEB2      | -0.155268481    | 4.300655369        | -4.418196063 | 3.22E-05 | 0.000414296      | 1.53569227  |
| DSCR3      | -0.162275224    | 5.823114205        | -4.418225602 | 3.22E-05 | 0.000414296      | 1.433377377 |
| CUL9       | -0.223158706    | 4.180257561        | -4.416104098 | 3.25E-05 | 0.000417146      | 1.538691085 |
| PJA1       | -0.149978393    | 5.217616821        | -4.415551745 | 3.25E-05 | 0.000417639      | 1.442196585 |
| CDKAL1     | -0.213288748    | 3.588642609        | -4.414119798 | 3.27E-05 | 0.00041949       | 1.586400237 |
| ZNF783     | -0.305501134    | 2.476198636        | -4.413274923 | 3.28E-05 | 0.000420439      | 1.748363152 |
| LOC389641  | 0.817448513     | -1.500220927       | 4.411849995  | 3.30E-05 | 0.000422292      | 2.199485132 |
| SNCAIP     | 0.479186973     | 0.814193648        | 4.409397321  | 3.33E-05 | 0.00042576       | 1.951306477 |
| FZD7       | -0.273629462    | 6.606377244        | -4.408949972 | 3.33E-05 | 0.0004261        | 1.393147275 |
| FAM50B     | -0.349708361    | 2.674194203        | -4.408583132 | 3.34E-05 | 0.000426314      | 1.724942101 |
| DYNC1LI1   | -0.160632363    | 5.299706318        | -4.407759633 | 3.35E-05 | 0.000427246      | 1.41216076  |
| HSPA1A     | 0.2317005       | 5.250289599        | 4.406993257  | 3.36E-05 | 0.00042809       | 1.408031518 |
| CYP1B1     | -0.273616732    | 9.171803602        | -4.404960163 | 3.38E-05 | 0.000430939      | 1.488639389 |
| ETFBKMT    | 0.386437522     | 0.872196008        | 4.4018091    | 3.42E-05 | 0.000435227      | 1.956442646 |
| ELK1       | -0.149675553    | 5.884369928        | -4.401963932 | 3.42E-05 | 0.000435227      | 1.370002786 |
| MIR34A     | 0.738200477     | 0.706988747        | 4.399851419  | 3.45E-05 | 0.000438002      | 1.943328482 |
| NME1       | 0.301542898     | 4.183521776        | 4.398307632  | 3.47E-05 | 0.000440124      | 1.454031665 |
| OPLAH      | 0.192969529     | 4.170025649        | 4.398059455  | 3.47E-05 | 0.000440154      | 1.461921918 |
| CSRNP3     | 1.619919396     | -2.732934304       | 4.396798824  | 3.48E-05 | 0.000441827      | 2.131542298 |
| SRM        | 0.236716801     | 7.019175171        | 4.396016028  | 3.49E-05 | 0.000442727      | 1.352724234 |

| Gene        | Log fold change | Average Expression | t            | P-value  | Adjusted P-value | B           |
|-------------|-----------------|--------------------|--------------|----------|------------------|-------------|
| SAV1        | 0.21651012      | 6.157821536        | 4.395574494  | 3.50E-05 | 0.000443073      | 1.346260625 |
| FRMD5       | -0.569290531    | 1.257888259        | -4.392384241 | 3.54E-05 | 0.000447637      | 1.832877839 |
| SERPINB9    | -0.451072607    | 1.529848247        | -4.392328789 | 3.54E-05 | 0.000447637      | 1.811957909 |
| WSB2        | -0.23640551     | 5.702922819        | -4.391700767 | 3.55E-05 | 0.000448295      | 1.340180897 |
| HIST1H3E    | 0.686909597     | -0.536527095       | 4.389003692  | 3.59E-05 | 0.000452         | 2.052991089 |
| FBXO11      | -0.303143778    | 5.322493572        | -4.389089843 | 3.58E-05 | 0.000452         | 1.341555196 |
| CMAS        | 0.184234201     | 4.437472426        | 4.387978646  | 3.60E-05 | 0.000453325      | 1.40513109  |
| EFNA5       | -0.27225429     | 4.593930497        | -4.386755251 | 3.62E-05 | 0.000454606      | 1.406763956 |
| SUGT1       | 0.227540933     | 5.280697045        | 4.38692006   | 3.61E-05 | 0.000454606      | 1.341399426 |
| TRIM44      | -0.252019814    | 7.020193003        | -4.384633021 | 3.64E-05 | 0.000457779      | 1.310550665 |
| KLHL36      | -0.312392635    | 5.194680456        | -4.383779925 | 3.66E-05 | 0.000458832      | 1.333063704 |
| ADPRH       | 0.371585437     | 1.874756938        | 4.383530396  | 3.66E-05 | 0.00045887       | 1.760193977 |
| RAB12       | 0.125903133     | 5.66495698         | 4.383162747  | 3.66E-05 | 0.000459108      | 1.308473225 |
| PLSCR4      | -0.236224299    | 5.777041196        | -4.381408298 | 3.69E-05 | 0.000461689      | 1.299992019 |
| DUBR        | 0.222507673     | 2.413173462        | 4.380874631  | 3.69E-05 | 0.000462026      | 1.635256028 |
| REV1        | -0.266661128    | 3.91669958         | -4.380756257 | 3.70E-05 | 0.000462026      | 1.403060504 |
| RRAGC       | -0.133996389    | 5.70905231         | -4.379159657 | 3.72E-05 | 0.000464355      | 1.292783153 |
| ZNF234      | -0.347673671    | 2.574632038        | -4.378549176 | 3.73E-05 | 0.000465011      | 1.56209736  |
| MOB4        | -0.202956686    | 4.220203624        | -4.377836311 | 3.74E-05 | 0.000465119      | 1.392642716 |
| CLMP        | -0.166065716    | 8.371915616        | -4.377808881 | 3.74E-05 | 0.000465119      | 1.345097914 |
| ZC3H14      | -0.158460436    | 5.455031886        | -4.378153358 | 3.73E-05 | 0.000465119      | 1.299078151 |
| COG7        | 0.202381385     | 3.509966312        | 4.376244452  | 3.76E-05 | 0.000467409      | 1.49753781  |
| RADIL       | 0.467431895     | 1.702855776        | 4.370218847  | 3.84E-05 | 0.000477306      | 1.799826525 |
| PAXIP1      | -0.283210907    | 2.953098513        | -4.370077964 | 3.84E-05 | 0.000477306      | 1.48448396  |
| PPP1R14C    | 0.813626637     | 0.128396647        | 4.369044133  | 3.86E-05 | 0.000478722      | 1.912659182 |
| SNRPA1      | 0.313067767     | 2.520385501        | 4.368145319  | 3.87E-05 | 0.000479906      | 1.547778783 |
| PAFAH1B1    | -0.30099176     | 6.874646025        | -4.367382522 | 3.88E-05 | 0.000480853      | 1.250964859 |
| SLC25A42    | 0.290531353     | 2.120043608        | 4.365720879  | 3.91E-05 | 0.000483391      | 1.649972868 |
| OMA1        | -0.231989312    | 3.087921336        | -4.364982846 | 3.92E-05 | 0.000483507      | 1.530486548 |
| CCNF        | -0.374421499    | 2.641123585        | -4.365083519 | 3.91E-05 | 0.000483507      | 1.497963731 |
| LMBR1L      | 0.185315316     | 3.495223172        | 4.365330499  | 3.91E-05 | 0.000483507      | 1.403918682 |
| ELP3        | 0.130490533     | 4.924137175        | 4.364200639  | 3.93E-05 | 0.000484497      | 1.270268814 |
| LSM11       | -0.363096134    | 2.549601979        | -4.361934643 | 3.96E-05 | 0.000488133      | 1.500740846 |
| RAB7B       | 0.308228887     | 3.951820994        | 4.360582984  | 3.98E-05 | 0.000490153      | 1.338574069 |
| TRO         | -0.329443317    | 3.479643341        | -4.358645213 | 4.01E-05 | 0.000492231      | 1.384612817 |
| SGTB        | -0.220514937    | 4.091010876        | -4.358971414 | 4.00E-05 | 0.000492231      | 1.322523254 |
| RASA1       | -0.364149898    | 4.766646739        | -4.35853507  | 4.01E-05 | 0.000492231      | 1.257990087 |
| ARFGAP3     | -0.327759398    | 5.557324152        | -4.358964018 | 4.00E-05 | 0.000492231      | 1.220871383 |
| SNX29       | -0.372254785    | 6.298805708        | -4.355936744 | 4.05E-05 | 0.000496528      | 1.203134853 |
| CCNJ        | -0.249403473    | 2.538351003        | -4.354388726 | 4.07E-05 | 0.000498941      | 1.571246142 |
| NIPAL2      | -0.271600442    | 5.857101226        | -4.353643068 | 4.08E-05 | 0.000499896      | 1.201907782 |
| AJUBA       | -0.380140964    | 4.579324189        | -4.351960306 | 4.11E-05 | 0.000502573      | 1.285109557 |
| DNAJC27-AS1 | 0.787094085     | -1.633319723       | 4.351728877  | 4.11E-05 | 0.00050259       | 2.004642718 |
| MARCKSL1    | 0.279975603     | 5.946022783        | 4.350927895  | 4.12E-05 | 0.000503656      | 1.188476751 |
| ATP6AP1     | 0.138919981     | 6.981062297        | 4.34863505   | 4.16E-05 | 0.000507483      | 1.183092902 |
| RABEP1      | -0.169421953    | 6.593265251        | -4.347854683 | 4.17E-05 | 0.00050852       | 1.175907256 |
| CSRP1       | 0.203215723     | 7.230610016        | 4.346765438  | 4.19E-05 | 0.000510135      | 1.187784195 |
| KIF1B       | -0.531867678    | 6.1691122652       | -4.345206631 | 4.21E-05 | 0.000512634      | 1.165968218 |
| PRRX1       | -0.195079602    | 9.256175293        | -4.342160087 | 4.26E-05 | 0.000517952      | 1.260079674 |
| NECTIN3     | -0.455110802    | 5.015483106        | -4.341121279 | 4.27E-05 | 0.000519501      | 1.189158898 |
| PARP11      | -0.184407813    | 3.419180643        | -4.340586756 | 4.28E-05 | 0.000520096      | 1.353488849 |
| SLC9A1      | 0.173338189     | 6.583520309        | 4.337033811  | 4.34E-05 | 0.000526255      | 1.137901371 |
| ASAP3       | 0.167937103     | 6.725121096        | 4.336920275  | 4.34E-05 | 0.000526255      | 1.13582762  |
| HCF2        | -0.360643486    | 4.034823166        | -4.335550533 | 4.36E-05 | 0.000528467      | 1.203144942 |
| EOGT        | -0.307114402    | 4.095278724        | -4.334041737 | 4.38E-05 | 0.000530957      | 1.226115556 |
| FHOD1       | 0.278202282     | 5.55138205         | 4.33266152   | 4.41E-05 | 0.000533209      | 1.125149496 |
| USP3        | -0.16451893     | 3.861447233        | -4.332241881 | 4.41E-05 | 0.000533597      | 1.271051317 |
| PLPP3       | -0.306777824    | 9.332650706        | -4.331893339 | 4.42E-05 | 0.000533847      | 1.231328038 |
| CCSAP       | -0.352612279    | 2.957839922        | -4.331414906 | 4.43E-05 | 0.000534351      | 1.333687018 |
| ZNF638      | -0.181953739    | 5.905801067        | -4.331115102 | 4.43E-05 | 0.000534507      | 1.12080008  |
| ZNF449      | -0.317118157    | 2.329986081        | -4.330578996 | 4.44E-05 | 0.000535125      | 1.355892    |
| FAM133B     | -0.311644638    | 1.308945101        | -4.327341342 | 4.49E-05 | 0.000541047      | 1.611445977 |
| BLOC1S4     | -0.198586703    | 3.532735878        | -4.326981868 | 4.50E-05 | 0.000541324      | 1.293501477 |
| KLHL9       | -0.302916724    | 6.145302146        | -4.323856136 | 4.55E-05 | 0.000547089      | 1.091871326 |
| NOC2L       | 0.154681237     | 5.55895829         | 4.320595719  | 4.60E-05 | 0.000553184      | 1.091254185 |
| FSIP1       | -0.544237266    | 0.233365003        | -4.320043861 | 4.61E-05 | 0.000553856      | 1.814798865 |
| BAG5        | -0.288660007    | 5.593550964        | -4.318854974 | 4.63E-05 | 0.000555816      | 1.091473496 |
| ARL15       | -0.214430236    | 3.427625651        | -4.318575654 | 4.64E-05 | 0.000555939      | 1.283895647 |
| IFNGR1      | -0.14786397     | 5.757372947        | -4.317940649 | 4.65E-05 | 0.000556783      | 1.084533635 |
| STOX2       | 0.647290558     | -0.863129416       | 4.316600597  | 4.67E-05 | 0.000558619      | 1.845319508 |

| Gene        | Log fold change | Average Expression | t            | P-value  | Adjusted P-value | B           |
|-------------|-----------------|--------------------|--------------|----------|------------------|-------------|
| MARCH5      | -0.136631298    | 5.394881261        | -4.316640154 | 4.67E-05 | 0.000558619      | 1.090912838 |
| ZMYM2       | -0.345952903    | 5.097287031        | -4.315411068 | 4.69E-05 | 0.000560598      | 1.079439896 |
| CUL5        | -0.315331094    | 4.752082652        | -4.313306456 | 4.73E-05 | 0.000564461      | 1.107240221 |
| CDC20       | -0.483815269    | 2.904816015        | -4.312872717 | 4.74E-05 | 0.000564905      | 1.363100434 |
| ETF1        | -0.196189953    | 7.215437237        | -4.311838347 | 4.75E-05 | 0.000566587      | 1.06504241  |
| C4orf48     | 0.463540687     | 2.505846463        | 4.310955245  | 4.77E-05 | 0.000567789      | 1.392722851 |
| FBXO45      | -0.301148228    | 3.83216195         | -4.310821218 | 4.77E-05 | 0.000567789      | 1.191674953 |
| SYNE3       | -0.285816644    | 5.747099827        | -4.308669863 | 4.81E-05 | 0.000571793      | 1.047114839 |
| SLC25A5     | 0.14642138      | 6.776025535        | 4.308455325  | 4.81E-05 | 0.000571793      | 1.038667451 |
| DOCK11      | -0.253949659    | 5.139383708        | -4.306310242 | 4.85E-05 | 0.000575364      | 1.064580083 |
| FBXL5       | -0.134708       | 5.635445994        | -4.306457428 | 4.85E-05 | 0.000575364      | 1.03848879  |
| MIR100HG    | -0.171055241    | 7.012308717        | -4.305862206 | 4.86E-05 | 0.000575848      | 1.03399066  |
| MON1A       | 0.2389412       | 3.87618841         | 4.304636137  | 4.88E-05 | 0.000577966      | 1.158458997 |
| PRKAR2A-AS1 | 0.56481894      | -0.817053585       | 4.303326289  | 4.90E-05 | 0.000580269      | 1.81277259  |
| GATA2       | -0.482350131    | 3.218539868        | -4.302023829 | 4.93E-05 | 0.000582564      | 1.269675222 |
| RUSC2       | 0.208416248     | 5.867802485        | 4.301773725  | 4.93E-05 | 0.000582637      | 1.025953204 |
| USP39       | 0.12117154      | 5.748653165        | 4.299954091  | 4.96E-05 | 0.000586042      | 1.01495626  |
| CYTH1       | -0.228316161    | 3.982642941        | -4.298345338 | 4.99E-05 | 0.000589016      | 1.120615551 |
| CDK14       | -0.28828374     | 5.423136117        | -4.298108232 | 5.00E-05 | 0.000589062      | 1.019554099 |
| KARS        | 0.178617613     | 7.080145036        | 4.294486833  | 5.06E-05 | 0.000596394      | 0.99688023  |
| NCS1        | 0.127016554     | 6.745144247        | 4.293367395  | 5.08E-05 | 0.000598355      | 0.987834499 |
| NECTIN1     | 0.237100138     | 4.913320088        | 4.292494852  | 5.10E-05 | 0.000599317      | 0.999561177 |
| ASCC3       | 0.405998068     | 6.341735674        | 4.292510261  | 5.10E-05 | 0.000599317      | 0.98125514  |
| ZNF512B     | -0.174328454    | 4.961439968        | -4.291457988 | 5.12E-05 | 0.000601108      | 1.019185481 |
| SNRNP27     | 0.199620478     | 4.236216915        | 4.288895809  | 5.17E-05 | 0.00060625       | 1.079377265 |
| ATG12       | -0.130749599    | 5.833501327        | -4.288162229 | 5.18E-05 | 0.000607393      | 0.972275221 |
| BTBD3       | -0.387869056    | 3.221702382        | -4.286890858 | 5.21E-05 | 0.000609727      | 1.19833072  |
| SF3A3       | 0.102710536     | 6.104155828        | 4.28623452   | 5.22E-05 | 0.000610705      | 0.959746541 |
| DLGAP5      | -0.616175294    | 2.139291775        | -4.285015627 | 5.24E-05 | 0.000612935      | 1.392636341 |
| SDCBP2-AS1  | -0.356785571    | 1.120915585        | -4.284267627 | 5.25E-05 | 0.000613647      | 1.543532279 |
| DOT1L       | -0.355612794    | 4.476610279        | -4.284354549 | 5.25E-05 | 0.000613647      | 1.042131005 |
| TCF4        | -0.396919529    | 6.941735363        | -4.282560263 | 5.29E-05 | 0.000616979      | 0.948324779 |
| CCDC77      | 0.236965007     | 2.407474073        | 4.280883168  | 5.32E-05 | 0.000620261      | 1.28227609  |
| FRWD1       | -0.148388956    | 5.45606528         | -4.280219883 | 5.33E-05 | 0.000621273      | 0.955998429 |
| GAM26E      | -0.341847087    | 4.81364623         | -4.279508819 | 5.35E-05 | 0.000622395      | 1.006798925 |
| KIAA1462    | -0.517286381    | 7.075087872        | -4.279251891 | 5.35E-05 | 0.000622494      | 0.942138354 |
| TCHH        | 0.798167548     | -1.869780875       | 4.277623661  | 5.38E-05 | 0.000624771      | 1.757566802 |
| FAXDC2      | 0.205572248     | 4.699607346        | 4.277823874  | 5.38E-05 | 0.000624771      | 1.003889066 |
| BOP1        | 0.254233913     | 5.170160483        | 4.277605573  | 5.38E-05 | 0.000624771      | 0.953169165 |
| RBMXL1      | -0.258157189    | 4.172779415        | -4.271732073 | 5.50E-05 | 0.000637714      | 1.050995486 |
| LCA5        | 0.372959203     | 1.982248428        | 4.271108796  | 5.51E-05 | 0.000638663      | 1.229662636 |
| WDR35       | -0.471397458    | 3.765736181        | -4.269721281 | 5.54E-05 | 0.000641106      | 1.036344287 |
| WDFY2       | -0.271846023    | 4.56994492         | -4.269629504 | 5.54E-05 | 0.000641106      | 0.975372101 |
| DET1        | 0.20211642      | 2.602152071        | 4.26599532   | 5.61E-05 | 0.000649095      | 1.212501165 |
| OSBPL6      | 0.306377611     | 3.195223668        | 4.265035439  | 5.63E-05 | 0.000650658      | 1.075909577 |
| FBXO8       | 0.187391708     | 3.835099089        | 4.264906508  | 5.64E-05 | 0.000650658      | 1.029283763 |
| MAGI2-AS3   | -0.147530649    | 5.659663206        | -4.262903022 | 5.68E-05 | 0.000654889      | 0.88705414  |
| BCORL1      | -0.447445578    | 4.2941112          | -4.262666952 | 5.68E-05 | 0.000654947      | 0.911316539 |
| MTSS1       | 0.407736773     | 3.733504322        | 4.260388391  | 5.73E-05 | 0.000659861      | 0.97837541  |
| PSMD8       | 0.227135016     | 6.895910096        | 4.259853489  | 5.74E-05 | 0.000660633      | 0.871684053 |
| CDK12       | -0.453253449    | 5.773545984        | -4.258591751 | 5.77E-05 | 0.000663146      | 0.871741655 |
| PRPF19      | 0.126932363     | 6.646422122        | 4.257866109  | 5.78E-05 | 0.000664381      | 0.861067473 |
| MEF2C       | -0.39417299     | 3.014628543        | -4.255623374 | 5.83E-05 | 0.000669277      | 1.119785266 |
| PIBF1       | 0.161123255     | 4.022707839        | 4.254043026  | 5.86E-05 | 0.000672597      | 0.984525998 |
| SPOPL       | -0.294632166    | 3.835672486        | -4.25316793  | 5.88E-05 | 0.000674213      | 0.991636492 |
| SRRM3       | 0.304310925     | 2.876424743        | 4.251843914  | 5.91E-05 | 0.000675729      | 1.098012323 |
| PGAM5       | -0.180330825    | 3.799188359        | -4.251704504 | 5.91E-05 | 0.000675729      | 0.972014531 |
| RRP15       | -0.192607203    | 4.392212933        | -4.251749909 | 5.91E-05 | 0.000675729      | 0.929540199 |
| PAF1        | 0.198416775     | 6.180383868        | 4.252265161  | 5.90E-05 | 0.000675729      | 0.842147288 |
| SNORA65     | 1.019111506     | -2.331330908       | 4.250936137  | 5.93E-05 | 0.000676581      | 1.670584217 |
| SIPA1L1     | -0.262977669    | 5.902498033        | -4.251028564 | 5.93E-05 | 0.000676581      | 0.839934456 |
| ABCF1       | -0.146445282    | 6.995716803        | -4.247982222 | 5.99E-05 | 0.000683318      | 0.832854087 |
| POLB        | 0.257178498     | 2.247428308        | 4.24654777   | 6.02E-05 | 0.000686345      | 1.219819306 |
| DNPEP       | 0.159886675     | 5.893853045        | 4.244384143  | 6.07E-05 | 0.000691203      | 0.816849849 |
| WDR33       | 0.165966009     | 5.158983501        | 4.241771332  | 6.13E-05 | 0.000696539      | 0.84916304  |
| WDR19       | -0.168228417    | 5.283380199        | -4.241746754 | 6.13E-05 | 0.000696539      | 0.828687231 |
| STX12       | -0.162861841    | 6.341301696        | -4.241624596 | 6.13E-05 | 0.000696539      | 0.803148006 |
| KLHL13      | -0.521497889    | -0.237431564       | -4.240901365 | 6.15E-05 | 0.000697832      | 1.553226222 |
| NRBP1       | 0.108504683     | 7.558028906        | 4.240214809  | 6.16E-05 | 0.000699036      | 0.826004396 |
| TMEM101     | 0.239647875     | 4.289288071        | 4.239573343  | 6.18E-05 | 0.000700127      | 0.893913372 |

| Gene      | Log fold change | Average Expression | t            | P-value  | Adjusted P-value | B           |
|-----------|-----------------|--------------------|--------------|----------|------------------|-------------|
| TMEM67    | -0.365239394    | 2.677748996        | -4.238876491 | 6.19E-05 | 0.000701306      | 1.114849069 |
| PSIP1     | -0.131605008    | 6.136290999        | -4.238690003 | 6.20E-05 | 0.000701306      | 0.794411556 |
| ZBTB7C    | 1.174638664     | -2.273065857       | 4.238384503  | 6.20E-05 | 0.000701551      | 1.633610963 |
| RYK       | -0.11247581     | 6.29346394         | -4.237744193 | 6.22E-05 | 0.000702645      | 0.790575325 |
| EML2      | 0.264307139     | 2.977948348        | 4.236522212  | 6.25E-05 | 0.00070469       | 1.058949615 |
| PLXNA2    | 0.448328057     | 3.387141399        | 4.23657118   | 6.24E-05 | 0.00070469       | 0.974736956 |
| RREB1     | -0.289458039    | 4.55708321         | -4.235581429 | 6.27E-05 | 0.000706194      | 0.838545144 |
| SLC2A1    | -0.355880043    | 4.850747086        | -4.23551552  | 6.27E-05 | 0.000706194      | 0.819295586 |
| MRPL18    | 0.278832829     | 5.158702655        | 4.234543894  | 6.29E-05 | 0.000708142      | 0.817180627 |
| EXT1      | -0.174922019    | 8.076924861        | -4.233473698 | 6.31E-05 | 0.000710347      | 0.83608068  |
| ZNF385D   | -0.338929733    | 3.550484636        | -4.230886748 | 6.37E-05 | 0.000715396      | 0.935486795 |
| DTWD1     | -0.147434925    | 5.053434572        | -4.231168154 | 6.37E-05 | 0.000715396      | 0.812069183 |
| CDC42BPA  | -0.272428836    | 6.238744506        | -4.230945797 | 6.37E-05 | 0.000715396      | 0.768164523 |
| SYNCRIP   | -0.234614733    | 7.560640125        | -4.23026221  | 6.39E-05 | 0.000716473      | 0.792351009 |
| FLFN5     | -0.240766543    | 7.365251933        | -4.229557601 | 6.40E-05 | 0.00071776       | 0.775167679 |
| MVK       | 0.273650154     | 4.389544604        | 4.229126421  | 6.41E-05 | 0.000718201      | 0.817637524 |
| MAP1S     | -0.208493706    | 5.592577546        | -4.228767958 | 6.42E-05 | 0.000718201      | 0.780067987 |
| POLDIP2   | 0.11359829      | 6.569880676        | 4.228881073  | 6.42E-05 | 0.000718201      | 0.759268545 |
| PATJ      | -0.264577078    | 2.187536221        | -4.22809491  | 6.44E-05 | 0.000719409      | 1.153638359 |
| GOLPH3L   | 0.229961226     | 4.941956626        | 4.227752333  | 6.45E-05 | 0.000719763      | 0.794055355 |
| S100A16   | 0.211063839     | 7.758351563        | 4.226540672  | 6.47E-05 | 0.000722375      | 0.790370098 |
| ARRB2     | 0.265571456     | 2.66961478         | 4.225010201  | 6.51E-05 | 0.000725828      | 1.073208783 |
| GBP3      | -0.210589536    | 4.838555984        | -4.224690735 | 6.52E-05 | 0.000726126      | 0.804631004 |
| KIAA0907  | 0.327069854     | 3.340576907        | 4.223470499  | 6.55E-05 | 0.000728783      | 0.914443688 |
| ATP13A3   | -0.616385583    | 6.929385497        | -4.222879444 | 6.56E-05 | 0.000729795      | 0.76411693  |
| CPEB2     | 0.460602533     | 3.635671408        | 4.222387636  | 6.57E-05 | 0.000730548      | 0.899705158 |
| C4orf36   | -0.322703509    | 1.87916097         | -4.221565462 | 6.59E-05 | 0.000731633      | 1.216651553 |
| ASMTL     | 0.194251839     | 5.051194808        | 4.221616317  | 6.59E-05 | 0.000731633      | 0.773656401 |
| APTX      | 0.134847634     | 4.408293267        | 4.221129784  | 6.60E-05 | 0.000732241      | 0.820607811 |
| MAFB      | -0.234293291    | 6.369397895        | -4.22046442  | 6.62E-05 | 0.000733456      | 0.730321591 |
| USP4      | 0.101898382     | 6.044328543        | 4.220145862  | 6.62E-05 | 0.000733757      | 0.731385571 |
| USP22     | -0.304340575    | 7.189989486        | -4.219811963 | 6.63E-05 | 0.000734099      | 0.741361915 |
| MSI2      | -0.237859637    | 3.492143305        | -4.219036124 | 6.65E-05 | 0.00073561       | 0.907978764 |
| TMEM63A   | -0.335160115    | 4.472597967        | -4.216970217 | 6.70E-05 | 0.000740009      | 0.815447319 |
| USP7      | -0.155628702    | 6.724009608        | -4.21701506  | 6.70E-05 | 0.000740009      | 0.72134922  |
| GPKOW     | 0.223311237     | 4.351074194        | 4.2160181    | 6.72E-05 | 0.000742003      | 0.811594313 |
| TMEM184C  | -0.155441579    | 5.540114535        | -4.214904241 | 6.75E-05 | 0.000744435      | 0.726971756 |
| WDR36     | -0.351134244    | 4.808245767        | -4.214026073 | 6.77E-05 | 0.000746242      | 0.747045771 |
| CNTLN     | -0.215318973    | 4.042753594        | -4.212984605 | 6.80E-05 | 0.000748494      | 0.873929286 |
| TACC1     | -0.372694245    | 6.364950534        | -4.211247484 | 6.84E-05 | 0.000752631      | 0.698852837 |
| RATC      | 0.099347268     | 6.441486695        | 4.210089062  | 6.87E-05 | 0.000755218      | 0.694174317 |
| B3GALNT1  | -0.307849982    | 3.925116582        | -4.208733716 | 6.90E-05 | 0.000758351      | 0.816076821 |
| ANO7      | 0.459458596     | 0.410193168        | 4.207419327  | 6.93E-05 | 0.000760495      | 1.30568013  |
| SUDS3     | -0.162845882    | 4.456171382        | -4.207413681 | 6.93E-05 | 0.000760495      | 0.769455205 |
| SRSF8     | -0.133582417    | 5.147589372        | -4.20733908  | 6.94E-05 | 0.000760495      | 0.721419058 |
| LINC01465 | -0.549074142    | -0.174656792       | -4.206556631 | 6.96E-05 | 0.00076208       | 1.448800946 |
| USP37     | -0.573921795    | 1.859431593        | -4.20624842  | 6.96E-05 | 0.00076237       | 1.054660223 |
| ISOC1     | 0.199167252     | 2.825597499        | 4.205988934  | 6.97E-05 | 0.000762526      | 0.943068951 |
| HIC2      | 0.271987176     | 1.901026669        | 4.204256033  | 7.01E-05 | 0.000766729      | 1.095671982 |
| NAV1      | -0.323008539    | 7.893032257        | -4.204039446 | 7.02E-05 | 0.000766769      | 0.718024078 |
| RRAS2     | -0.213507333    | 5.5924253          | -4.203457059 | 7.03E-05 | 0.000767817      | 0.680804387 |
| RNF150    | -0.496937004    | 3.555162537        | -4.203154268 | 7.04E-05 | 0.000768095      | 0.852121798 |
| EPS8      | -0.335248298    | 6.85565671         | -4.201527962 | 7.08E-05 | 0.000772033      | 0.671900251 |
| SERAC1    | -0.262483234    | 3.915414965        | -4.199359487 | 7.14E-05 | 0.000777501      | 0.79834356  |
| EIF5A2    | -0.274930474    | 3.784739633        | -4.198724342 | 7.15E-05 | 0.000778711      | 0.855907939 |
| PARVB     | 0.169541819     | 5.590101887        | 4.197746463  | 7.18E-05 | 0.000780884      | 0.6667361   |
| LPIN3     | -0.275488399    | 2.856857359        | -4.194248425 | 7.27E-05 | 0.000790171      | 0.956613728 |
| JPH2      | -0.710053648    | 0.812016049        | -4.191233413 | 7.35E-05 | 0.000797694      | 1.264041727 |
| TMEM199   | 0.275401354     | 2.366875285        | 4.191202845  | 7.35E-05 | 0.000797694      | 1.017106507 |
| EVI2B     | 0.475900507     | 2.727352227        | 4.188859167  | 7.41E-05 | 0.000803289      | 0.976963042 |
| SPG11     | -0.327649364    | 5.688497729        | -4.188850638 | 7.41E-05 | 0.000803289      | 0.63256992  |
| LONRF1    | -0.282123258    | 3.465584677        | -4.188412556 | 7.42E-05 | 0.000803395      | 0.802652691 |
| THADA     | -0.163834147    | 4.921707282        | -4.18843313  | 7.42E-05 | 0.000803395      | 0.675672268 |
| TSR2      | 0.184118032     | 4.700500937        | 4.185372435  | 7.51E-05 | 0.000811609      | 0.671063935 |
| PTCH2     | 0.663584213     | -0.8311147         | 4.184006959  | 7.54E-05 | 0.000815002      | 1.411028404 |
| STAM      | 0.129860121     | 5.356189712        | 4.182410321  | 7.59E-05 | 0.000819087      | 0.623548333 |
| CRTC3     | -0.279636801    | 5.740173738        | -4.182069781 | 7.59E-05 | 0.000819498      | 0.604912039 |
| SSX2IP    | -0.343919014    | 3.971005894        | -4.18185383  | 7.60E-05 | 0.000819545      | 0.728683934 |
| PDGFRA    | -0.382583646    | 8.246157833        | -4.180749632 | 7.63E-05 | 0.000822202      | 0.648408802 |
| MIR214    | -0.300962543    | 2.86164075         | -4.179526173 | 7.66E-05 | 0.00082522       | 0.862807587 |

| Gene         | Log fold change | Average Expression | t            | P-value     | Adjusted P-value | B           |
|--------------|-----------------|--------------------|--------------|-------------|------------------|-------------|
| EGLN3        | -0.567861145    | -0.054739553       | -4.177484045 | 7.72E-05    | 0.000830678      | 1.307908258 |
| TKT          | 0.229822889     | 9.503230614        | 4.176953384  | 7.73E-05    | 0.000831663      | 0.703049535 |
| ZDHHC16      | 0.185393323     | 4.988515016        | 4.174695474  | 7.80E-05    | 0.000837809      | 0.624064985 |
| NUFIP2       | -0.349033256    | 6.694748287        | -4.173871651 | 7.82E-05    | 0.000839682      | 0.572027084 |
| NATD1        | 0.181826695     | 5.373809546        | 4.172863134  | 7.85E-05    | 0.000842115      | 0.585376189 |
| THAP12       | -0.216949788    | 4.413666259        | -4.170385331 | 7.92E-05    | 0.000849004      | 0.633922296 |
| RBM3         | 0.184086073     | 7.082893927        | 4.170025087  | 7.93E-05    | 0.000849493      | 0.574540727 |
| PCCA         | -0.220334227    | 3.473871277        | -4.169155347 | 7.95E-05    | 0.000851532      | 0.775788344 |
| DFDT1        | 0.208857534     | 7.369933844        | 4.167306165  | 8.01E-05    | 0.000856569      | 0.569905715 |
| MPI          | 0.121942103     | 4.663375839        | 4.166114186  | 8.04E-05    | 0.000859614      | 0.612822824 |
| SLC26A6      | 0.385246634     | 2.03765608         | 4.162947194  | 8.13E-05    | 0.000868776      | 0.904998604 |
| CAMK1        | 0.214739519     | 2.214314331        | 4.162356852  | 8.15E-05    | 0.000869992      | 0.913976142 |
| CALM2        | 0.131644438     | 9.28489651         | 4.160388286  | 8.21E-05    | 0.000875508      | 0.638729962 |
| ATP5A1       | 0.092168026     | 8.194112673        | 4.159424205  | 8.23E-05    | 0.000877284      | 0.575614123 |
| DICER1       | -0.350644417    | 4.679057723        | -4.159461581 | 8.23E-05    | 0.000877284      | 0.563024701 |
| PLEKHH3      | -0.291382598    | 3.977505756        | -4.159154552 | 8.24E-05    | 0.000877508      | 0.66146244  |
| HUS1         | -0.164584334    | 3.25033555         | -4.15863632  | 8.26E-05    | 0.000878512      | 0.738260825 |
| TET3         | -0.501826382    | 3.302868369        | -4.15839588  | 8.27E-05    | 0.000878645      | 0.715135107 |
| ACSL4        | -0.418200533    | 6.580916194        | -4.157324974 | 8.30E-05    | 0.000881388      | 0.517262289 |
| STX6         | 0.166617553     | 5.570593247        | 4.156765872  | 8.31E-05    | 0.000882525      | 0.523313037 |
| WDR46        | 0.139979182     | 5.745658002        | 4.154335517  | 8.39E-05    | 0.000889584      | 0.508684204 |
| IFT20        | 0.254733569     | 4.223395662        | 4.153578934  | 8.41E-05    | 0.00089136       | 0.615797909 |
| MCHR1        | 0.623008332     | -0.870021042       | 4.152250644  | 8.45E-05    | 0.000894962      | 1.22654419  |
| CCNK         | 0.188425312     | 3.887381912        | 4.151518055  | 8.47E-05    | 0.000896673      | 0.627217277 |
| DDX21        | -0.536623703    | 6.723208104        | -4.150269962 | 8.51E-05    | 0.000900039      | 0.497597043 |
| SMAD6        | -0.297038702    | 4.686621818        | -4.14976105  | 8.52E-05    | 0.000901041      | 0.550772384 |
| UBXN2A       | -0.151860699    | 4.673106186        | -4.148821658 | 8.55E-05    | 0.000903429      | 0.549902706 |
| LOC100129940 | -0.30352821     | 2.07477141         | -4.146141278 | 8.63E-05    | 0.000911461      | 0.896701401 |
| INPP4A       | -0.229090518    | 4.234555589        | -4.144626306 | 8.68E-05    | 0.000915753      | 0.58915925  |
| CNTN3        | -0.379417922    | 4.929539113        | -4.14271809  | 8.74E-05    | 0.000921353      | 0.509372809 |
| NOTCH4       | 0.623461525     | -1.092941624       | 4.141500901  | 8.78E-05    | 0.000924708      | 1.282790241 |
| TK2          | -0.123400785    | 5.490420324        | -4.139324261 | 8.85E-05    | 0.000931252      | 0.47216351  |
| TTLL7        | -0.4461056      | 1.52854077         | -4.137822811 | 8.89E-05    | 0.000935588      | 0.968205819 |
| MRPS30       | -0.132491083    | 4.733217967        | -4.136914844 | 8.92E-05    | 0.000937961      | 0.497525172 |
| VPS26A       | -0.16714873     | 6.522092107        | -4.136650726 | 8.93E-05    | 0.000938189      | 0.443527011 |
| MAX          | 0.094417517     | 5.949285316        | 4.13593748   | 8.95E-05    | 0.000939918      | 0.443380942 |
| EHMT1        | 0.153368862     | 5.1063869          | 4.135683868  | 8.96E-05    | 0.000940111      | 0.467657684 |
| EFTUD2       | 0.115166554     | 6.235507254        | 4.134019167  | 9.01E-05    | 0.000945038      | 0.433541781 |
| NSD3         | -0.19512595     | 5.634840997        | -4.132083525 | 9.08E-05    | 0.000950905      | 0.440887961 |
| BDKRB2       | -0.608009977    | 6.242183572        | -4.13082318  | 9.12E-05    | 0.000954513      | 0.426638197 |
| HTRA2        | 0.187710614     | 4.250571187        | 4.130274625  | 9.14E-05    | 0.000955713      | 0.529805487 |
| WASF3        | -0.222451829    | 5.681985992        | -4.128420328 | 9.20E-05    | 0.000961366      | 0.424269674 |
| CST3         | 0.248832169     | 8.492572375        | 4.127127169  | 9.24E-05    | 0.000965126      | 0.474718256 |
| TTC9C        | 0.172556133     | 3.837304174        | 4.126912644  | 9.25E-05    | 0.000965193      | 0.521452643 |
| KCND2        | -0.318461291    | 4.199278463        | -4.125151186 | 9.30E-05    | 0.000970581      | 0.514331885 |
| MGC20647     | 1.351307311     | -4.286925105       | 4.120313384  | 9.47E-05    | 0.000986721      | 1.130956536 |
| DYRK1A       | -0.169737031    | 5.425501902        | -4.11922082  | 9.50E-05    | 0.000989871      | 0.409994796 |
| KTI12        | -0.197038871    | 3.77299            | -4.118720783 | 9.52E-05    | 0.000990945      | 0.555730363 |
| PKNOX1       | -0.18062198     | 4.683564458        | -4.118184076 | 9.54E-05    | 0.000992149      | 0.436124364 |
| AMER1        | -0.454817528    | 3.437917893        | -4.117427255 | 9.56E-05    | 0.000994132      | 0.527992962 |
| ZSCAN26      | 0.19518166      | 3.204013778        | 4.116785917  | 9.58E-05    | 0.000995024      | 0.560534114 |
| LETM1        | -0.193685321    | 5.232678098        | -4.116922768 | 9.58E-05    | 0.000995024      | 0.398082897 |
| GLIS3        | -0.38331663     | 4.7081096          | -4.114579121 | 9.66E-05    | 0.001002157      | 0.436508217 |
| FAM58A       | 0.25673054      | 3.579667113        | 4.112681034  | 9.72E-05    | 0.001008234      | 0.528015285 |
| ZNF587       | -0.41854212     | 1.906493437        | -4.11210094  | 9.74E-05    | 0.001009616      | 0.774130614 |
| LDAH         | -0.185653467    | 3.536278178        | -4.110555839 | 9.80E-05    | 0.00101377       | 0.580251599 |
| RHBDD1       | -0.129706002    | 5.118278764        | -4.110683674 | 9.79E-05    | 0.00101377       | 0.402161886 |
| YAP1         | -0.235885816    | 7.323748076        | -4.110181138 | 9.81E-05    | 0.001013851      | 0.37154969  |
| DDX23        | 0.120015388     | 6.095195324        | 4.110146096  | 9.81E-05    | 0.001013851      | 0.354100966 |
| ZNF529       | -0.270573407    | 3.107817609        | -4.109591634 | 9.83E-05    | 0.00101515       | 0.577227657 |
| BZW2         | 0.1700316       | 5.677736543        | 4.108446125  | 9.87E-05    | 0.001018584      | 0.354351817 |
| CCDC117      | 0.189117298     | 4.966505348        | 4.107829833  | 9.89E-05    | 0.001020113      | 0.372240189 |
| HHAT         | -0.378404751    | 1.88068685         | -4.106687892 | 9.93E-05    | 0.001022851      | 0.799960283 |
| HM13         | 0.152011798     | 8.152803381        | 4.10670943   | 9.93E-05    | 0.001022851      | 0.391434687 |
| ADAT2        | -0.290620123    | 1.243818607        | -4.105944513 | 9.96E-05    | 0.001024849      | 0.795117107 |
| HECA         | -0.17768067     | 4.928659174        | -4.104403127 | 0.000100146 | 0.001029759      | 0.390679064 |
| PRDM10       | -0.37211618     | 3.067861748        | -4.103943988 | 0.000100309 | 0.001030732      | 0.536201859 |
| TMEM87B      | -0.397283488    | 5.275172518        | -4.103312643 | 0.000100534 | 0.001032336      | 0.349165972 |
| SGPP1        | -0.184129196    | 4.699774945        | -4.102705013 | 0.00010075  | 0.001033632      | 0.382059486 |
| PURB         | -0.269657149    | 5.964151163        | -4.102573917 | 0.000100797 | 0.001033632      | 0.334460386 |

| Gene      | Log fold change | Average Expression | t            | P-value     | Adjusted P-value | B           |
|-----------|-----------------|--------------------|--------------|-------------|------------------|-------------|
| PRSS36    | 0.648581501     | -0.975931398       | 4.101406145  | 0.000101215 | 0.001037211      | 1.149386438 |
| SSH1      | -0.307200311    | 6.283163648        | -4.099477038 | 0.000101909 | 0.001043612      | 0.317459287 |
| ZNF441    | 0.251071582     | 3.029300148        | 4.098549633  | 0.000102244 | 0.001046333      | 0.503630318 |
| C15orf52  | -0.306932977    | 2.85873684         | -4.098306503 | 0.000102332 | 0.001046523      | 0.605256961 |
| DDIT4L    | -0.502526876    | 3.144948644        | -4.09617785  | 0.000103106 | 0.001053724      | 0.576785639 |
| FAM118B   | 0.178156964     | 4.662245137        | 4.095607245  | 0.000103315 | 0.001055139      | 0.366602396 |
| SH3GLB1   | -0.201312051    | 7.133444197        | -4.093855649 | 0.000103957 | 0.00106098       | 0.310645611 |
| SLC25A1   | 0.234790497     | 6.55098851         | 4.093469935  | 0.000104099 | 0.00106171       | 0.295999493 |
| ZCCHC2    | -0.400888357    | 3.576307931        | -4.093033399 | 0.00010426  | 0.001062632      | 0.446465696 |
| CLTA      | 0.179141756     | 7.68904408         | 4.092701853  | 0.000104382 | 0.00106316       | 0.322564686 |
| PXK       | -0.193527923    | 6.37636074         | -4.089184093 | 0.000105689 | 0.001075744      | 0.28272182  |
| KNSTRN    | -0.217865874    | 2.798134175        | -4.088135707 | 0.000106082 | 0.001078282      | 0.547668764 |
| VEZT      | -0.158870832    | 5.377023165        | -4.088282318 | 0.000106027 | 0.001078282      | 0.303776498 |
| CHN2      | 1.096690428     | -1.07700627        | 4.086636638  | 0.000106645 | 0.001083281      | 1.112121683 |
| MAPK1IP1L | -0.15113128     | 6.291143158        | -4.085602697 | 0.000107036 | 0.001086515      | 0.269574741 |
| GTPBP3    | 0.257491648     | 1.816883155        | 4.084863105  | 0.000107316 | 0.00108798       | 0.689662353 |
| HIST1H2AC | 0.197407792     | 4.384570022        | 4.084840449  | 0.000107325 | 0.00108798       | 0.366000209 |
| KIAA0513  | 0.263303438     | 4.716627643        | 4.083768731  | 0.000107732 | 0.001091374      | 0.310291624 |
| MED7      | -0.167390561    | 2.881418051        | -4.082516139 | 0.00010821  | 0.001095478      | 0.531771702 |
| KLF12     | -0.281546278    | 4.517058216        | -4.081491928 | 0.000108602 | 0.001098711      | 0.337950737 |
| SNX7      | 0.131889954     | 5.566779264        | 4.080249179  | 0.00010908  | 0.001102804      | 0.266007436 |
| RFWD3     | -0.341610789    | 4.23672806         | -4.080038849 | 0.000109161 | 0.001102884      | 0.336245693 |
| BRIP1     | -0.472725711    | 1.236700707        | -4.077479546 | 0.000110152 | 0.00111215       | 0.775135671 |
| BRINP1    | 0.421519902     | 4.296092071        | 4.075104619  | 0.000111079 | 0.001120763      | 0.290813431 |
| C5orf51   | -0.218786596    | 5.562360364        | -4.074408573 | 0.000111353 | 0.001122767      | 0.248973284 |
| BACH2     | -0.608859765    | 0.656526184        | -4.073759303 | 0.000111608 | 0.00112459       | 0.82446029  |
| MARS2     | -0.320105838    | 1.563310003        | -4.073281364 | 0.000111796 | 0.001125736      | 0.757916594 |
| RBM19     | 0.133524069     | 4.752206789        | 4.071224002  | 0.000112611 | 0.001133179      | 0.274747408 |
| GTF3C4    | -0.466351985    | 5.514072909        | -4.06759515  | 0.000114061 | 0.00114701       | 0.222754314 |
| POLI      | -0.222647441    | 3.201498718        | -4.067299984 | 0.00011418  | 0.001147438      | 0.449455708 |
| BARD1     | -0.389420995    | 1.54624861         | -4.06679339  | 0.000114384 | 0.001148723      | 0.712409081 |
| C2orf81   | 0.282560836     | 2.728406403        | 4.065260225  | 0.000115004 | 0.001154179      | 0.480938602 |
| ZNF408    | 0.242558179     | 3.824678985        | 4.064380023  | 0.000115362 | 0.00115626       | 0.357621489 |
| AMOT      | -0.474123099    | 4.257087503        | -4.064371393 | 0.000115365 | 0.00115626       | 0.31964625  |
| ANKRD40   | -0.28203313     | 5.223962171        | -4.0623805   | 0.000116177 | 0.001163626      | 0.222734704 |
| WRAP73    | 0.285317674     | 2.941920392        | 4.060843033  | 0.000116808 | 0.001169169      | 0.492380276 |
| RAB23     | -0.366245195    | 5.431830417        | -4.059287579 | 0.00011745  | 0.0011717        | 0.202108689 |
| SLC25A24  | -0.293963868    | 5.419290366        | -4.059288482 | 0.00011745  | 0.0011717        | 0.196831411 |
| NELFCD    | 0.1189472       | 5.617576864        | 4.059308118  | 0.000117442 | 0.0011717        | 0.192107791 |
| FNBP1     | -0.138476197    | 6.103338647        | -4.059301681 | 0.000117444 | 0.0011717        | 0.183648831 |
| RFN4      | -0.272680645    | 5.786585465        | -4.059356527 | 0.000117421 | 0.0011717        | 0.183278356 |
| PRDX1     | 0.183256607     | 7.345007249        | 4.058520088  | 0.000117768 | 0.001174094      | 0.195065546 |
| LRCH4     | 0.246841767     | 1.902587643        | 4.05628114   | 0.0001187   | 0.001182604      | 0.561905242 |
| CDH10     | 0.827747161     | -0.097625409       | 4.05607904   | 0.000118785 | 0.001182663      | 0.925829047 |
| GEM       | 0.330878446     | 5.441893037        | 4.055050802  | 0.000119215 | 0.001186168      | 0.184573372 |
| ZKSCAN7   | 0.34533483      | 1.131765305        | 4.05456656   | 0.000119419 | 0.001187407      | 0.640806125 |
| PSMA7     | 0.231056464     | 6.828141815        | 4.054316526  | 0.000119524 | 0.001187669      | 0.167457317 |
| RASD2     | 0.521246708     | 0.130717568        | 4.053665652  | 0.000119798 | 0.001189286      | 0.79188306  |
| CCDC171   | -0.363525055    | 1.434248042        | -4.053368101 | 0.000119923 | 0.001189286      | 0.742239791 |
| CNOT10    | 0.137270792     | 4.394555074        | 4.053439336  | 0.000119893 | 0.001189286      | 0.258669161 |
| RBFOX2    | -0.323868261    | 7.25392317         | -4.053094154 | 0.000120039 | 0.00118965       | 0.173304462 |
| POLG      | 0.173770482     | 4.915980749        | 4.051897478  | 0.000120546 | 0.001193885      | 0.192645006 |
| MAP4K3    | -0.292473539    | 4.112261692        | -4.051343036 | 0.000120781 | 0.00119543       | 0.269654584 |
| MEX3A     | -0.453446216    | 1.797947981        | -4.047836072 | 0.00012228  | 0.001209473      | 0.564282339 |
| BCAR3     | -0.261702904    | 4.476338419        | -4.047221741 | 0.000122545 | 0.001211293      | 0.257492311 |
| SCAPER    | -0.296066015    | 2.305336864        | -4.04572344  | 0.000123192 | 0.001216892      | 0.548233883 |
| KDM2A     | -0.249470149    | 6.559740558        | -4.04545965  | 0.000123306 | 0.001217223      | 0.135023823 |
| ZFP91     | -0.264325064    | 6.879737992        | -4.044768733 | 0.000123606 | 0.001219384      | 0.137988945 |
| AKAP2     | -0.728360786    | 1.82086826         | -4.043931944 | 0.00012397  | 0.001222175      | 0.588221214 |
| NFR3      | -0.509450067    | 4.586719636        | -4.043156614 | 0.000124308 | 0.001224709      | 0.207481607 |
| NFATC1    | 0.226194402     | 3.954438508        | 4.042228628  | 0.000124714 | 0.001227342      | 0.24680648  |
| HK2       | -0.331647595    | 5.150617754        | -4.0421733   | 0.000124739 | 0.001227342      | 0.156057734 |
| RIOK1     | -0.202351605    | 4.498889724        | -4.041499568 | 0.000125034 | 0.001229448      | 0.197153487 |
| MARK4     | 0.173740757     | 5.94190108         | 4.041036674  | 0.000125238 | 0.001230646      | 0.124453434 |
| PP7080    | -0.217543297    | 1.888064634        | -4.040348358 | 0.000125541 | 0.001232821      | 0.541220034 |
| CEP112    | -0.158782007    | 3.406949595        | -4.039825791 | 0.000125772 | 0.001234282      | 0.320575872 |
| PACSIN2   | 0.1396578       | 5.329703887        | 4.038625719  | 0.000126303 | 0.001237883      | 0.129758054 |
| TSC22D1   | -0.17850086     | 6.756704903        | -4.0387479   | 0.000126249 | 0.001237883      | 0.114922344 |
| MYRF      | 0.507107137     | -0.700689792       | 4.038107667  | 0.000126533 | 0.001238545      | 0.906271389 |
| WNT5A     | -0.396906694    | 5.248233809        | -4.038036612 | 0.000126564 | 0.001238545      | 0.146847705 |

| Gene         | Log fold change | Average Expression | t            | P-value     | Adjusted P-value | B            |
|--------------|-----------------|--------------------|--------------|-------------|------------------|--------------|
| ALYREF       | 0.258702038     | 5.078105877        | 4.037918091  | 0.000126617 | 0.001238545      | 0.139853166  |
| BHLHE41      | -0.333590844    | 3.210328112        | -4.036257825 | 0.000127357 | 0.001244978      | 0.332577347  |
| SELENOS      | -0.210000935    | 5.3078796          | -4.034476855 | 0.000128156 | 0.001251974      | 0.12413213   |
| WDR17        | -0.578296409    | -0.360056314       | -4.034207895 | 0.000128277 | 0.001252345      | 0.855858335  |
| ARVCF        | 0.275220622     | 2.722160254        | 4.033474595  | 0.000128608 | 0.001254759      | 0.380067794  |
| ING4         | 0.217103874     | 4.103207248        | 4.032542439  | 0.000129029 | 0.001258055      | 0.237705183  |
| RPP25L       | 0.236577505     | 3.253551134        | 4.03094686   | 0.000129754 | 0.001264132      | 0.309404202  |
| PARP9        | -0.165317073    | 5.648832961        | -4.030800469 | 0.00012982  | 0.001264132      | 0.100401524  |
| UBE2M        | 0.203772383     | 5.036285761        | 4.030507504  | 0.000129954 | 0.001264614      | 0.128470641  |
| ARF1         | 0.114705923     | 8.449831954        | 4.029593365  | 0.000130371 | 0.001267857      | 0.152274874  |
| EMC6         | 0.446227304     | 0.197222865        | 4.028973038  | 0.000130655 | 0.001269341      | 0.809329853  |
| C17orf62     | -0.106402948    | 5.773855368        | -4.028892036 | 0.000130692 | 0.001269341      | 0.091855848  |
| ZNF620       | -0.48673803     | -0.148168452       | -4.028114354 | 0.000131049 | 0.001271988      | 0.830584068  |
| IDH3B        | 0.178030702     | 5.510376877        | 4.027540272  | 0.000131313 | 0.00127373       | 0.090176759  |
| LOC101929709 | -0.395656837    | 0.384363742        | -4.026769157 | 0.000131669 | 0.001273357      | 0.790613889  |
| IFFO1        | 0.229838582     | 5.764899492        | 4.02550233   | 0.000132255 | 0.001281214      | 0.075385344  |
| PHLPP1       | -0.371904059    | 3.907200325        | -4.023909028 | 0.000132996 | 0.001286859      | 0.203038539  |
| FZD1         | -0.233756301    | 5.858148964        | -4.023881573 | 0.000133008 | 0.001286859      | 0.070986225  |
| AMOTL1       | -0.454305515    | 7.254369008        | -4.021993244 | 0.000133892 | 0.001294572      | 0.075473947  |
| FAM180A      | -0.282060739    | 5.276057543        | -4.019873043 | 0.00013489  | 0.001302861      | 0.093180058  |
| EIF4EBP2     | -0.195926963    | 7.275569194        | -4.019805364 | 0.000134922 | 0.001302861      | 0.0611612    |
| PCGF5        | -0.289602188    | 5.881539381        | -4.019524909 | 0.000135054 | 0.001303306      | 0.051446946  |
| GNL2         | -0.231158423    | 6.088498473        | -4.018842435 | 0.000135378 | 0.001305589      | 0.045549939  |
| LEO1         | 0.173584107     | 4.861074304        | 4.017424018  | 0.000136052 | 0.001311117      | 0.082341786  |
| IDUA         | 0.230280707     | 5.290937739        | 4.017258987  | 0.000136131 | 0.001311117      | 0.067482397  |
| RNASSET2     | 0.250164823     | 3.498672886        | 4.016640055  | 0.000136426 | 0.001313175      | 0.224795595  |
| LHFPL2       | -0.403519822    | 7.028739195        | -4.014466435 | 0.000137468 | 0.001322361      | 0.041734959  |
| LOC100129534 | -0.422460975    | 0.265730459        | -4.012398844 | 0.000138466 | 0.001331115      | 0.763959517  |
| C1orf159     | 0.283712704     | 2.219729501        | 4.011935544  | 0.000138691 | 0.001332425      | 0.408862892  |
| DIS3L2       | 0.216100393     | 3.207069131        | 4.011621801  | 0.000138843 | 0.001333038      | 0.286536542  |
| SNAP23       | -0.313701735    | 4.706166411        | -4.010729463 | 0.000139278 | 0.001336355      | 0.081608873  |
| LIMK2        | 0.300579454     | 2.994397414        | 4.009219285  | 0.000140015 | 0.001342578      | 0.234057616  |
| CCSER2       | -0.198401508    | 5.722479411        | -4.008827324 | 0.000140207 | 0.001343565      | 0.020818772  |
| EVI2A        | 0.485747889     | 3.246375771        | 4.008504907  | 0.000140366 | 0.001344226      | 0.2806361    |
| B3GALT2      | -1.031877624    | 0.308947518        | -4.005809445 | 0.000141695 | 0.001355233      | 0.791768636  |
| RIOX1        | -0.187498098    | 3.384309151        | -4.00589941  | 0.000141665 | 0.001355233      | 0.20311643   |
| MED19        | 0.210630172     | 3.80663775         | 4.004360952  | 0.000142414 | 0.001360172      | 0.149042068  |
| CDCA7L       | -0.296849954    | 4.266778088        | -4.004224375 | 0.000142482 | 0.001360172      | 0.098303762  |
| ELF1         | -0.378800827    | 5.817395193        | -4.004553667 | 0.000142318 | 0.001360172      | -0.00068861  |
| ERMARD       | -0.194503488    | 2.952360528        | -4.003313379 | 0.000142937 | 0.001362096      | 0.276072995  |
| KRAS         | -0.313057367    | 4.937454237        | -4.003244073 | 0.000142971 | 0.001362096      | 0.034350989  |
| H2AFY        | 0.170464167     | 6.224304542        | 4.003313304  | 0.000142937 | 0.001362096      | -0.006789728 |
| PI4KB        | 0.111341151     | 6.217793221        | 4.003095528  | 0.000143045 | 0.001362096      | -0.007485649 |
| RORA         | -0.335136528    | 3.82302801         | -4.000039478 | 0.000144581 | 0.001375849      | 0.159570474  |
| RPS6KA4      | 0.149615769     | 6.213833542        | 3.998514526  | 0.000145353 | 0.001382324      | -0.023004329 |
| ALS2         | -0.261637383    | 4.187937874        | -3.997614322 | 0.000145811 | 0.001385802      | 0.071730785  |
| LYPLAL1      | -0.24311261     | 3.268407022        | -3.996289124 | 0.000146487 | 0.001389609      | 0.22718903   |
| INHBA        | 0.642678526     | 5.264476187        | 3.996582279  | 0.000146337 | 0.001389609      | 0.017673183  |
| CABIN1       | -0.129647028    | 6.393439527        | -3.996287212 | 0.000146488 | 0.001389609      | -0.030847541 |
| ADRB2        | 1.158526225     | -2.860654557       | 3.995110871  | 0.000147091 | 0.001392704      | 0.857813512  |
| C19orf57     | -0.618972729    | -0.799973599       | -3.995109382 | 0.000147092 | 0.001392704      | 0.83552203   |
| SLC38A9      | 0.238542775     | 2.826221988        | 3.99535293   | 0.000146967 | 0.001392704      | 0.255770331  |
| NEURL1B      | 0.429787942     | 0.991437861        | 3.993147222  | 0.000148103 | 0.001401394      | 0.484032326  |
| QTRT2        | -0.269002196    | 3.472561385        | -3.992652455 | 0.000148359 | 0.001402935      | 0.117429508  |
| BRF2         | 0.188177547     | 2.232055947        | 3.992361033  | 0.00014851  | 0.001403481      | 0.298270057  |
| NUP37        | 0.18748306      | 3.386314104        | 3.991671174  | 0.000148868 | 0.001405982      | 0.171250213  |
| ANAPC15      | 0.249236389     | 2.063633528        | 3.991475382  | 0.000148969 | 0.001406061      | 0.364577536  |
| SPG7         | 0.153991724     | 5.457389482        | 3.990910761  | 0.000149263 | 0.001407952      | -0.02869383  |
| ZBED4        | -0.293506365    | 4.285177119        | -3.990355185 | 0.000149553 | 0.0014098        | 0.046153453  |
| SLC15A3      | 0.241570216     | 4.151121681        | 3.986757654  | 0.000151441 | 0.001426708      | 0.051597131  |
| DTX3L        | -0.220945305    | 5.692946277        | -3.986069244 | 0.000151805 | 0.001429243      | -0.055077046 |
| HMGB3        | 0.160521885     | 3.956111096        | 3.985520397  | 0.000152096 | 0.001431086      | 0.04894101   |
| ZNF33A       | -0.195368894    | 3.864810401        | -3.984105791 | 0.000152848 | 0.001437263      | 0.06107044   |
| ATP6V0D1     | 0.140473539     | 7.173848232        | 3.983402516  | 0.000153223 | 0.001439891      | -0.060725526 |
| RP2          | -0.319961141    | 3.949836283        | -3.983028498 | 0.000153422 | 0.001440871      | 0.074415527  |
| KRT17        | 0.97676472      | -1.999051811       | 3.980980173  | 0.000154521 | 0.001450287      | 0.809890454  |
| SSBP4        | 0.277773396     | 5.868167414        | 3.980675966  | 0.000154685 | 0.001450921      | -0.074101388 |
| DEAF1        | 0.19315595      | 4.982343353        | 3.979955319  | 0.000155074 | 0.001453663      | -0.042399988 |
| SRRM2        | -0.28804769     | 8.730959797        | -3.97968511  | 0.00015522  | 0.00145395       | -0.004517972 |
| CCT8         | 0.117911628     | 6.961784686        | 3.979541673  | 0.000155298 | 0.00145395       | -0.078871328 |

| Gene       | Log fold change | Average Expression | t            | P-value     | Adjusted P-value | B            |
|------------|-----------------|--------------------|--------------|-------------|------------------|--------------|
| SLFN11     | -0.383960176    | 5.64041666         | -3.978299978 | 0.000155971 | 0.001459345      | -0.079142105 |
| ZNF837     | 0.357302328     | 0.855533237        | 3.976726533  | 0.000156828 | 0.001466452      | 0.483425404  |
| SLC20A2    | -0.283713324    | 5.443241045        | -3.975119934 | 0.000157707 | 0.001473763      | -0.097384207 |
| ST3GAL4    | 0.214663407     | 4.456448977        | 3.972477877  | 0.000159164 | 0.001486455      | -0.022930742 |
| SNAI2      | -0.282083824    | 6.800166099        | -3.971350005 | 0.00015979  | 0.001491376      | -0.114013645 |
| DDX3X      | -0.36808195     | 7.822588676        | -3.971084189 | 0.000159938 | 0.001491831      | -0.077735831 |
| RCSD1      | 1.197382767     | -3.41937982        | 3.970181235  | 0.000160441 | 0.001495599      | 0.775504967  |
| RAI1       | -0.253539279    | 5.205463477        | -3.969463076 | 0.000160843 | 0.001498413      | -0.102855264 |
| SPRY4      | -0.350393756    | 3.754660943        | -3.96846734  | 0.000161401 | 0.001502261      | 0.154583981  |
| COQ7       | -0.161355054    | 3.161389543        | -3.968370192 | 0.000161455 | 0.001502261      | 0.120518721  |
| YIPF4      | -0.144042695    | 5.556530055        | -3.963919839 | 0.000163973 | 0.001524744      | -0.12145826  |
| SAE1       | 0.109567699     | 6.802638803        | 3.963557582  | 0.000164179 | 0.001525723      | -0.135197892 |
| HSPB1      | 0.330485688     | 7.853606312        | 3.962916413  | 0.000164546 | 0.001528184      | -0.107365194 |
| BRMS1      | 0.247337595     | 5.447152675        | 3.962450021  | 0.000164812 | 0.00152972       | -0.12487981  |
| G6PD       | 0.217012981     | 7.225634283        | 3.959958577  | 0.000166245 | 0.001542068      | -0.138665452 |
| PTGER2     | -0.380506492    | 2.853236957        | -3.958545417 | 0.000167063 | 0.00154775       | 0.139628825  |
| CCNB1      | -0.352121242    | 3.902917573        | -3.958651793 | 0.000167002 | 0.00154775       | 0.009127526  |
| ARL13B     | -0.43189288     | 3.334324178        | -3.955177414 | 0.000169028 | 0.001564993      | 0.032889912  |
| PARD3      | -0.154226248    | 5.38636833         | -3.9540606   | 0.000169685 | 0.001570107      | -0.146974187 |
| ZFP90      | 0.235085104     | 4.836887464        | 3.952719217  | 0.000170477 | 0.001576465      | -0.136293018 |
| DUSP7      | -0.33292354     | 4.922825719        | -3.952350993 | 0.000170695 | 0.001577512      | -0.116623671 |
| CAND2      | 0.332339829     | 1.874595508        | 3.949274197  | 0.000172526 | 0.001592486      | 0.266041865  |
| RAB5C      | 0.166844175     | 5.724682126        | 3.94941973   | 0.000172439 | 0.001592486      | -0.177536308 |
| RAB27B     | -0.543269167    | 2.60546856         | -3.947814899 | 0.000173402 | 0.001599413      | 0.203183731  |
| PUSL1      | 0.237746236     | 3.472066732        | 3.947669432  | 0.000173489 | 0.001599413      | -0.017336799 |
| TMED6      | -0.766499974    | -1.342795931       | -3.946918206 | 0.000173942 | 0.001600646      | 0.678051117  |
| SLC4A4     | -0.410105077    | 0.476354238        | -3.947169985 | 0.00017379  | 0.001600646      | 0.418355506  |
| UCK1       | 0.166836049     | 4.799372464        | 3.946994799  | 0.000173896 | 0.001600646      | -0.134796281 |
| GNB2       | 0.204149514     | 7.466947938        | 3.946206058  | 0.000174372 | 0.001603624      | -0.17915009  |
| DCK        | -0.277018919    | 3.502135041        | -3.944439906 | 0.000175443 | 0.00161116       | -0.015122404 |
| PINK1      | 0.154090276     | 4.875322563        | 3.944422693  | 0.000175453 | 0.00161116       | -0.154591109 |
| RDH11      | 0.119870063     | 6.061976038        | 3.944083355  | 0.000175659 | 0.001612513      | -0.2029293   |
| ARPC2      | 0.110081759     | 8.254087487        | 3.943406527  | 0.000176072 | 0.001615316      | -0.147269888 |
| TMEM65     | -0.238567366    | 5.479330044        | -3.943056211 | 0.000176286 | 0.001616294      | -0.18588898  |
| DEPDC1     | -0.514566933    | 1.154009176        | -3.942447344 | 0.000176658 | 0.001603624      | 0.397213492  |
| USF1       | 0.211140167     | 4.0235056          | 3.9420292    | 0.000176914 | 0.001619099      | -0.121011846 |
| AP2A1      | 0.122631505     | 7.937477936        | 3.942200863  | 0.000176809 | 0.001619099      | -0.171004985 |
| OMG        | 0.523973865     | 2.248261576        | 3.939778184  | 0.000178299 | 0.001629794      | 0.208195432  |
| FRG1       | 0.184945154     | 3.95938266         | 3.939914771  | 0.000178215 | 0.001629794      | -0.096563801 |
| GPATCH3    | 0.168646021     | 3.628358312        | 3.939203127  | 0.000178655 | 0.001632053      | -0.044271356 |
| MANEA      | -0.293549321    | 4.050298154        | -3.938069892 | 0.000179357 | 0.001636652      | -0.1032433   |
| MAP4K5     | -0.183413967    | 5.920165537        | -3.938040632 | 0.000179375 | 0.001636652      | -0.219429497 |
| PSMA3      | 0.219525234     | 5.652823717        | 3.937497097  | 0.000179713 | 0.001638742      | -0.21778403  |
| PTPRE      | -0.605998136    | 0.691084505        | -3.936871819 | 0.000180103 | 0.001641301      | 0.36364523   |
| XPOT       | -0.17032831     | 7.676060488        | -3.936350758 | 0.000180428 | 0.00164327       | -0.201016156 |
| TBC1D13    | 0.121788968     | 5.61479244         | 3.935621522  | 0.000180884 | 0.001646428      | -0.221209481 |
| TIGD3      | 0.964667549     | -2.532390607       | 3.933832483  | 0.000182008 | 0.001655654      | 0.670606488  |
| MAP7D1     | -0.147325795    | 7.48370726         | -3.933075486 | 0.000182485 | 0.001658995      | -0.216023212 |
| FIG4       | -0.146959354    | 4.803186196        | -3.932671982 | 0.00018274  | 0.001660311      | -0.171776434 |
| SLC35F6    | -0.117582985    | 6.200907328        | -3.931795638 | 0.000183295 | 0.001664349      | -0.242054271 |
| BEND7      | -0.200971285    | 2.675097587        | -3.930221992 | 0.000184296 | 0.001672426      | 0.028050072  |
| TSH22      | -0.292070106    | 5.995178989        | -3.929643021 | 0.000184665 | 0.00167477       | -0.24585574  |
| ATP6V0A1   | -0.171156477    | 5.56764939         | -3.9283601   | 0.000185486 | 0.001681205      | -0.244139419 |
| ST6GALNAC4 | 0.191662962     | 5.547283024        | 3.927859636  | 0.000185807 | 0.001683104      | -0.24371478  |
| TMEM19     | -0.188925936    | 4.472669593        | -3.927176251 | 0.000186247 | 0.001686072      | -0.177015318 |
| POLD3      | -0.211956416    | 3.910892564        | -3.926479307 | 0.000186696 | 0.001689124      | -0.127939396 |
| VRK3       | 0.163952196     | 4.243580353        | 3.926025585  | 0.000186989 | 0.00169076       | -0.167304171 |
| NOC4L      | 0.272522973     | 3.848303524        | 3.925088288  | 0.000187596 | 0.001694213      | -0.118431848 |
| BMI1       | -0.121032783    | 5.077482244        | -3.925092451 | 0.000187593 | 0.001694213      | -0.224238984 |
| NPC1       | -0.337493092    | 6.177670535        | -3.923653496 | 0.000188529 | 0.001701615      | -0.271191875 |
| MTCL1      | 0.212939524     | 6.909153688        | 3.922959345  | 0.000188981 | 0.00170468       | -0.264302406 |
| GATAD2A    | -0.154262941    | 6.496354754        | -3.920946663 | 0.0001903   | 0.001715547      | -0.280443338 |
| SPATA2L    | -0.27131194     | 2.970331552        | -3.920665579 | 0.000190485 | 0.001716186      | 0.027426734  |
| HIST1H2BK  | 0.245726008     | 3.126630661        | 3.918138072  | 0.000192155 | 0.001730197      | -0.051415409 |
| NSUN2      | -0.191413002    | 5.378357571        | -3.912212292 | 0.000196125 | 0.001764893      | -0.282618651 |
| APOBEC3F   | 0.333821098     | 1.16355274         | 3.910851806  | 0.000197048 | 0.001772137      | 0.272031967  |
| CYSRT1     | 0.804547826     | -1.547473644       | 3.909763602  | 0.000197789 | 0.001777739      | 0.574555113  |
| SNAPC4     | -0.154743213    | 3.720390271        | -3.909431144 | 0.000198016 | 0.001778717      | -0.197784605 |
| BMP2K      | -0.299288219    | 4.45940182         | -3.908855445 | 0.000198409 | 0.00178119       | -0.256457075 |
| ZNF330     | -0.151809137    | 4.792549649        | -3.908439383 | 0.000198694 | 0.001782685      | -0.258349622 |



| Gene       | Log fold change | Average Expression | t            | P-value     | Adjusted P-value | B            |
|------------|-----------------|--------------------|--------------|-------------|------------------|--------------|
| CCDC96     | -0.335139955    | 0.65396698         | -3.908235828 | 0.000198834 | 0.001782875      | 0.258186158  |
| RNF219     | -0.305295381    | 3.222851008        | -3.906429914 | 0.000200075 | 0.001792942      | -0.126591156 |
| FDXACB1    | -0.421885085    | -0.094022186       | -3.906235793 | 0.000200209 | 0.001793075      | 0.41965287   |
| TEP1       | -0.386337528    | 3.967411334        | -3.904406131 | 0.000201476 | 0.001803346      | -0.194234895 |
| DDX54      | 0.121522259     | 5.817737169        | 3.903382329  | 0.000202188 | 0.001808644      | -0.334094469 |
| GFOD2      | -0.145115929    | 4.193608722        | -3.90297849  | 0.000202469 | 0.001810088      | -0.247985366 |
| CERCAM     | 0.146726491     | 8.292245114        | 3.90279765   | 0.000202595 | 0.001810141      | -0.282264332 |
| HIPK3      | -0.376576325    | 5.994863136        | -3.901812848 | 0.000203284 | 0.001815216      | -0.338632131 |
| NUP50      | -0.269371536    | 4.812006591        | -3.901089715 | 0.000203791 | 0.001818665      | -0.308311392 |
| PLK1       | -0.427411966    | 2.51621726         | -3.898862871 | 0.00020536  | 0.001830599      | 0.010061047  |
| RRBP1      | 0.120389523     | 9.518901448        | 3.898846622  | 0.000205371 | 0.001830599      | -0.217607431 |
| EIF1AD     | -0.179947635    | 4.363042681        | -3.898514235 | 0.000205606 | 0.001830632      | -0.263478515 |
| NUP62      | -0.123872615    | 5.626037825        | -3.898497951 | 0.000205618 | 0.001830632      | -0.347842004 |
| PPP1R15A   | 0.318063772     | 6.371601883        | 3.898296322  | 0.000205761 | 0.001830821      | -0.352571116 |
| RAP2C-AS1  | -0.485685202    | 0.629915254        | -3.896096941 | 0.000207325 | 0.001842558      | 0.305310202  |
| BTBD7      | -0.28515942     | 5.414905789        | -3.896254828 | 0.000207212 | 0.001842558      | -0.346610958 |
| RBM43      | 0.231112813     | 3.923322896        | 3.894093655  | 0.000208759 | 0.001854211      | -0.245137014 |
| FAM196A    | 0.466537045     | 0.187746065        | 3.893333858  | 0.000209305 | 0.001857969      | 0.252053137  |
| EXOC3L2    | 1.202069088     | -3.257144852       | 3.892038312  | 0.00021024  | 0.001864706      | 0.541453207  |
| CLK2       | 0.352480304     | 3.206244649        | 3.891939319  | 0.000210312 | 0.001864706      | -0.19732238  |
| MECP2      | -0.159765122    | 6.027324893        | -3.891536363 | 0.000210603 | 0.001866194      | -0.375143949 |
| MDH2       | 0.118077217     | 7.233953266        | 3.890068578  | 0.000211669 | 0.001874536      | -0.368023959 |
| CEP162     | -0.171266075    | 3.327955042        | -3.889702013 | 0.000211936 | 0.001874696      | -0.126866638 |
| CAPN1      | 0.13724271      | 7.724351795        | 3.889857876  | 0.000211823 | 0.001874696      | -0.352517552 |
| EMD        | 0.213495048     | 5.839487486        | 3.88923213   | 0.000212279 | 0.001876625      | -0.377385689 |
| NR1D1      | 0.230653056     | 4.789334349        | 3.8884811    | 0.000212828 | 0.001879293      | -0.308233081 |
| NDN        | 0.142632646     | 6.536982252        | 3.8884778    | 0.00021283  | 0.001879293      | -0.387011296 |
| MAPRE2     | -0.146307639    | 5.053295491        | -3.887244932 | 0.000213734 | 0.001886169      | -0.34570501  |
| SGIP1      | -0.274973881    | 3.047557208        | -3.886975366 | 0.000213932 | 0.001886812      | -0.132769649 |
| EIF5B      | 0.156991452     | 7.530388384        | 3.886017224  | 0.000214638 | 0.001889717      | -0.365386669 |
| SRP54      | 0.131606739     | 5.446264757        | 3.886155106  | 0.000214536 | 0.001889717      | -0.382909239 |
| NAPA       | 0.144289861     | 6.13400156         | 3.886168083  | 0.000214527 | 0.001889717      | -0.393396437 |
| PSMD14     | 0.172848402     | 5.741505264        | 3.88453677   | 0.000215733 | 0.001898245      | -0.393270215 |
| PPP2R1A    | 0.132402254     | 8.146183873        | 3.883167466  | 0.00021675  | 0.001906083      | -0.351770627 |
| METTL12    | 0.271996388     | 1.93214468         | 3.882424333  | 0.000217304 | 0.00190984       | 0.017379421  |
| SLAIN2     | -0.201028701    | 5.938467515        | -3.88140272  | 0.000218068 | 0.001915436      | -0.402619276 |
| MTMR10     | -0.292043427    | 3.931062264        | -3.881162097 | 0.000218248 | 0.001915902      | -0.27947361  |
| SRA1       | 0.25974531      | 5.006115942        | 3.880355549  | 0.000218853 | 0.001920097      | -0.372457331 |
| FBXO30     | -0.232648638    | 4.981149681        | -3.880084936 | 0.000219057 | 0.001920764      | -0.359485769 |
| NUF2       | -0.530033795    | 0.918441433        | -3.878502629 | 0.00022025  | 0.001929085      | 0.236700892  |
| HSF2       | -0.213056522    | 3.404001352        | -3.878394588 | 0.000220332 | 0.001929085      | -0.232677735 |
| HMGL       | 0.200585399     | 4.744770578        | 3.878317647  | 0.00022039  | 0.001929085      | -0.346731984 |
| EXOSC7     | 0.240261297     | 4.079633125        | 3.877778582  | 0.000220798 | 0.001931536      | -0.30352772  |
| PTMA       | 0.169082881     | 7.049989946        | 3.876843006  | 0.000221508 | 0.001936624      | -0.416770755 |
| LINC01021  | 0.514444694     | -0.101640471       | 3.876196818  | 0.000222    | 0.001939648      | 0.309358252  |
| APPL2      | -0.13276855     | 6.662963494        | -3.876050321 | 0.000222112 | 0.001939648      | -0.42686014  |
| GTSE1      | -0.415923757    | 1.76841565         | -3.875234157 | 0.000222735 | 0.001943961      | 0.036552593  |
| ARL6IP6    | -0.341404967    | 2.614454875        | -3.87445983  | 0.000223327 | 0.001948004      | -0.078110372 |
| ZRSR2      | 0.291037332     | 2.507361967        | 3.873876286  | 0.000223775 | 0.00194965       | -0.11288351  |
| CERK       | -0.124596055    | 6.108360938        | -3.873977556 | 0.000223697 | 0.00194965       | -0.432543243 |
| COX8A      | 0.258043518     | 5.208632621        | 3.870882214  | 0.000226085 | 0.001968636      | -0.409376687 |
| AGTPBP1    | -0.202381526    | 3.385715422        | -3.869860286 | 0.000226878 | 0.001974405      | -0.237966559 |
| RBM42      | 0.251975379     | 6.129198654        | 3.866833536  | 0.000229244 | 0.001993844      | -0.455975346 |
| CHRN1      | 0.333847356     | 1.177703682        | 3.865625153  | 0.000230196 | 0.002000962      | 0.080799804  |
| RCOR2      | -0.278791404    | 1.695706982        | -3.863960347 | 0.000231512 | 0.002011247      | -0.105053401 |
| RGS17      | -0.332594395    | 2.180347559        | -3.863782942 | 0.000231653 | 0.00201131       | -0.106009535 |
| TRPS1      | -0.343819053    | 5.598755458        | -3.86133481  | 0.000233604 | 0.002027076      | -0.465555003 |
| PARD3B     | -0.199710718    | 5.301825729        | -3.86115991  | 0.000233743 | 0.002027123      | -0.447047766 |
| MAGEH1     | 0.129981104     | 4.888739397        | 3.860258736  | 0.000234466 | 0.002032217      | -0.436121501 |
| YIF1A      | 0.214581401     | 5.928268544        | 3.859161005  | 0.000235349 | 0.002038696      | -0.476978201 |
| DAAM2      | -0.312291664    | 5.300265095        | -3.856801463 | 0.000237257 | 0.002054045      | -0.464183005 |
| PAXIP1-AS1 | -0.341625559    | 0.844356857        | -3.856317827 | 0.00023765  | 0.002055851      | 0.152557456  |
| PDXDC1     | -0.166215822    | 6.10472065         | -3.856208798 | 0.000237739 | 0.002055851      | -0.492402088 |
| C16orf52   | -0.256220164    | 3.663838903        | -3.854944327 | 0.000238769 | 0.002063273      | -0.277533704 |
| TSPYL1     | -0.148220013    | 6.045568774        | -3.854820203 | 0.000238871 | 0.002063273      | -0.494545077 |
| TBL1XR1    | -0.18478432     | 6.279531309        | -3.854213214 | 0.000239367 | 0.002066376      | -0.498374675 |
| PSMD12     | -0.161700704    | 5.718504508        | -3.852134075 | 0.000241075 | 0.002079931      | -0.493150858 |
| FBXL3      | -0.263468606    | 5.471833524        | -3.851650246 | 0.000241475 | 0.002080991      | -0.488070157 |
| TMEM214    | 0.104248501     | 7.131425908        | 3.851683224  | 0.000241447 | 0.002080991      | -0.49554639  |
| NCKAP5L    | -0.158096796    | 5.510310694        | -3.850498233 | 0.000242427 | 0.002088009      | -0.489127973 |

| Gene      | Log fold change | Average Expression | t            | P-value     | Adjusted P-value | B            |
|-----------|-----------------|--------------------|--------------|-------------|------------------|--------------|
| PITPNM2   | 0.221387382     | 3.715021363        | 3.849824526  | 0.000242986 | 0.002090756      | -0.371811581 |
| MAPKAP1   | -0.091294851    | 6.846731728        | -3.849779256 | 0.000243024 | 0.002090756      | -0.511333638 |
| NPLOC4    | -0.156996989    | 6.750527381        | -3.849102714 | 0.000243587 | 0.002094401      | -0.513668431 |
| PRMT1     | 0.191182548     | 6.212401438        | 3.848889318  | 0.000243764 | 0.002094733      | -0.515828883 |
| TRUB1     | 0.189278151     | 4.069405647        | 3.848576963  | 0.000244025 | 0.002095775      | -0.399447858 |
| TP11      | 0.199649102     | 7.643812051        | 3.848154434  | 0.000244377 | 0.002097608      | -0.491339737 |
| LYPLA2    | 0.173982858     | 4.116710247        | 3.846293307  | 0.000245937 | 0.002109788      | -0.422512581 |
| PEPD      | 0.127779396     | 6.964684197        | 3.844654133  | 0.000247318 | 0.002120428      | -0.524004911 |
| BCAS2     | 0.173426647     | 4.616384963        | 3.843906541  | 0.00024795  | 0.00212464       | -0.455271269 |
| CIART     | -0.397220269    | 2.017818515        | -3.842610659 | 0.00024905  | 0.002129805      | -0.010460563 |
| TBC1D1    | 0.135113828     | 4.709707742        | 3.842778861  | 0.000248907 | 0.002129805      | -0.474552729 |
| DDAH1     | -0.180154547    | 7.17706387         | -3.843010268 | 0.00024871  | 0.002129805      | -0.506273841 |
| CYC1      | 0.245376895     | 5.616999325        | 3.842530054  | 0.000249118 | 0.002129805      | -0.523034461 |
| FOXO3     | -0.28889425     | 5.416132466        | -3.841446586 | 0.000250041 | 0.002136486      | -0.521210895 |
| ARF4      | 0.117748057     | 8.532967593        | 3.839898728  | 0.000251366 | 0.002144156      | -0.462925285 |
| FBXO31    | -0.158245389    | 5.648502226        | -3.840021721 | 0.000251261 | 0.002144156      | -0.542954298 |
| CDK16     | 0.09885665      | 6.650804306        | 3.840104236  | 0.00025119  | 0.002144156      | -0.54416502  |
| WDR59     | 0.163518739     | 3.992057207        | 3.837666852  | 0.000253288 | 0.002159328      | -0.411035192 |
| RPL13     | 0.226670315     | 9.914367865        | 3.837435333  | 0.000253488 | 0.002159812      | -0.404496378 |
| ALDOA     | 0.214545279     | 10.01998868        | 3.836562102  | 0.000254245 | 0.002165032      | -0.397831647 |
| RLIM      | -0.289666087    | 5.657162129        | -3.835308008 | 0.000255335 | 0.002173085      | -0.549453615 |
| EEFSEC    | 0.225302983     | 3.977332831        | 3.833835341  | 0.00025662  | 0.002182794      | -0.420275762 |
| ATIC      | 0.132198491     | 6.460109309        | 3.832252865  | 0.000258009 | 0.002193366      | -0.570567738 |
| CBFB      | -0.151942365    | 5.350373981        | -3.8313656   | 0.00025879  | 0.002198769      | -0.553348721 |
| DPM2      | 0.217789458     | 4.71933195         | 3.830786661  | 0.000259302 | 0.002201871      | -0.511069658 |
| FAM35A    | -0.433434744    | 3.064103521        | -3.827562004 | 0.000262167 | 0.002224947      | -0.32648052  |
| FLYWCH1   | 0.229140523     | 5.64940981         | 3.82533881   | 0.00026416  | 0.002240598      | -0.575110575 |
| EFCAB11   | -0.216387431    | 2.258504788        | -3.824379863 | 0.000265024 | 0.002246662      | -0.188701444 |
| ZNF562    | -0.236803479    | 3.552224616        | -3.822843389 | 0.000266414 | 0.002257177      | -0.414229116 |
| HARS2     | 0.137206572     | 3.968278409        | 3.819772089  | 0.000269214 | 0.002279615      | -0.508015541 |
| NRROS     | -0.336867109    | 1.904221204        | -3.819517847 | 0.000269447 | 0.002280306      | -0.16241335  |
| EML4      | -0.343476974    | 5.369241108        | -3.818686878 | 0.00027021  | 0.002285479      | -0.596458841 |
| CC2D2A    | -0.185746853    | 4.384234363        | -3.817670478 | 0.000271146 | 0.002292109      | -0.505878815 |
| RBM4      | -0.272495055    | 1.632967201        | -3.816996273 | 0.000271768 | 0.002296083      | -0.108705417 |
| NR3C1     | -0.253272342    | 7.480725544        | -3.816752435 | 0.000271994 | 0.0022967        | -0.600053979 |
| ZNF865    | 0.197909973     | 4.565038375        | 3.816254925  | 0.000272454 | 0.002299301      | -0.542811844 |
| GREB1     | 0.69928915      | -1.432071639       | 3.815614496  | 0.000273048 | 0.002303025      | 0.265370802  |
| FOXP2     | -0.26100972     | 3.408115283        | -3.815263939 | 0.000273374 | 0.002304481      | -0.41097904  |
| ITPK1     | 0.153164266     | 6.733183776        | 3.81477812   | 0.000273826 | 0.002307001      | -0.624226696 |
| SLC7A6OS  | 0.239038964     | 1.925921067        | 3.812772904  | 0.000275699 | 0.002320187      | -0.203564892 |
| LPAR1     | -0.162666883    | 7.542792162        | -3.812841457 | 0.000275635 | 0.002320187      | -0.614975899 |
| MAP3K6    | 0.145037745     | 5.655311299        | 3.812585606  | 0.000275875 | 0.002320369      | -0.62147928  |
| LINC01204 | -0.599925932    | -1.006833618       | -3.812108294 | 0.000276323 | 0.002321862      | 0.212799348  |
| PRX       | 0.158225973     | 3.633013993        | 3.812067971  | 0.000276361 | 0.002321862      | -0.469568616 |
| BBS2      | -0.12576122     | 4.842411954        | -3.811385783 | 0.000277002 | 0.002325955      | -0.577679598 |
| TMPO      | -0.207143361    | 5.357886982        | -3.811137412 | 0.000277236 | 0.002326622      | -0.610664074 |
| PLRL      | -0.711705395    | 3.142975278        | -3.810503901 | 0.000277834 | 0.002330338      | -0.351940748 |
| AASDH     | 0.298238536     | 2.623290751        | 3.808881944  | 0.000279369 | 0.002341912      | -0.351654813 |
| KLHL35    | 0.531998302     | -0.067311872       | 3.808347662  | 0.000279877 | 0.002344862      | 0.15167836   |
| SPSB1     | -0.361945292    | 5.790773619        | -3.807077798 | 0.000281087 | 0.002353689      | -0.642427821 |
| ATP5D     | 0.297590325     | 6.010490349        | 3.806303397  | 0.000281827 | 0.002358577      | -0.64893306  |
| CAP1      | 0.108798907     | 8.094123786        | 3.805441189  | 0.000282653 | 0.002364179      | -0.599823858 |
| SFPQ      | -0.194860047    | 7.289650633        | -3.804998448 | 0.000283078 | 0.002366422      | -0.638472399 |
| PDLIM1    | 0.176790863     | 5.130980746        | 3.804461175  | 0.000283595 | 0.002369428      | -0.624932043 |
| RAP2A     | -0.198700358    | 5.311452829        | -3.804152134 | 0.000283893 | 0.0023706        | -0.642645406 |
| INSIG2    | -0.193534495    | 4.163325817        | -3.802783814 | 0.000285215 | 0.002380318      | -0.54306292  |
| CFLAR     | -0.167109439    | 5.308854358        | -3.802317631 | 0.000285666 | 0.002381448      | -0.638695727 |
| DEGS1     | 0.107433535     | 6.850436318        | 3.802371846  | 0.000285614 | 0.002381448      | -0.660267809 |
| FBXO44    | 0.252182701     | 3.787852458        | 3.801142897  | 0.000286807 | 0.002389639      | -0.49659824  |
| C19orf12  | -0.124811365    | 4.902248112        | -3.800397558 | 0.000287534 | 0.002394366      | -0.619100943 |
| HEIH      | 0.246023088     | 2.813316265        | 3.798738484  | 0.000289157 | 0.00240655       | -0.412461356 |
| SNRNP70   | 0.213743604     | 6.764295481        | 3.798159672  | 0.000289725 | 0.002409948      | -0.677306508 |
| CLINT1    | -0.221631723    | 6.366305812        | -3.797651651 | 0.000290225 | 0.002412772      | -0.681392425 |
| BMP1      | 0.115564404     | 6.919760689        | 3.797259887  | 0.00029061  | 0.002414647      | -0.676572472 |
| KCNJ5     | 1.125781874     | -3.12281035        | 3.796585459  | 0.000291276 | 0.002418842      | 0.257830101  |
| TP63      | -1.080343716    | -2.035905522       | -3.794916933 | 0.000292928 | 0.002429667      | 0.253472792  |
| SLFN13    | -0.531141467    | -0.467487594       | -3.794781154 | 0.000293063 | 0.002429667      | 0.117699271  |
| GSKIP     | -0.150556002    | 4.25765988         | -3.794858219 | 0.000292987 | 0.002429667      | -0.599040947 |
| IMPACT    | -0.192015277    | 5.050298605        | -3.794443016 | 0.000293399 | 0.002431115      | -0.655239168 |
| PGS1      | -0.182747721    | 3.820448266        | -3.794023195 | 0.000293817 | 0.002433239      | -0.527665292 |

| Gene     | Log fold change | Average Expression | t            | P-value     | Adjusted P-value | B            |
|----------|-----------------|--------------------|--------------|-------------|------------------|--------------|
| PEAK1    | -0.34531341     | 7.467487483        | -3.793393687 | 0.000294445 | 0.002437097      | -0.673675042 |
| CCNA2    | -0.360040325    | 2.790799771        | -3.792766883 | 0.000295071 | 0.002440938      | -0.407830275 |
| PLCD4    | -0.268616815    | 1.632737545        | -3.792549419 | 0.000295288 | 0.002441397      | -0.213962882 |
| RNF213   | -0.318622921    | 7.191184432        | -3.791787323 | 0.000296052 | 0.002446368      | -0.692059651 |
| NSDHL    | 0.199520442     | 5.653501009        | 3.791404475  | 0.000296436 | 0.002448029      | -0.698602835 |
| PPP2CA   | -0.119991079    | 6.51490808         | -3.791263357 | 0.000296578 | 0.002448029      | -0.702882964 |
| ASB13    | -0.210024114    | 3.853794379        | -3.790396707 | 0.00029745  | 0.002453883      | -0.594406883 |
| TMEM184A | 1.144383873     | -3.323615353       | 3.788629447  | 0.000299236 | 0.002465916      | 0.226974882  |
| SLC6A8   | 0.139272461     | 5.39886838         | 3.788631686  | 0.000299234 | 0.002465916      | -0.692556626 |
| HCFC1    | -0.24390405     | 6.343263795        | -3.787365781 | 0.00030052  | 0.002475138      | -0.71540582  |
| FAM172A  | -0.159052376    | 4.930541493        | -3.786800722 | 0.000301095 | 0.002477169      | -0.67266955  |
| MAP1LC3B | 0.105742284     | 7.202556774        | 3.786837027  | 0.000301058 | 0.002477169      | -0.702230589 |
| LIAS     | 0.2294496       | 2.711540426        | 3.786146273  | 0.000301763 | 0.002481309      | -0.397166878 |
| DPP3     | 0.12042709      | 4.7221837          | 3.785760055  | 0.000302158 | 0.002481846      | -0.664287478 |
| RARS     | 0.116359013     | 6.557508502        | 3.785817826  | 0.000302099 | 0.002481846      | -0.717487511 |
| KANK1    | -0.269568776    | 4.342509423        | -3.78442724  | 0.000303524 | 0.00249171       | -0.615288614 |
| ZNF697   | -0.422398096    | 3.847131254        | -3.78394698  | 0.000304018 | 0.002494404      | -0.570759966 |
| PTPN9    | -0.186547995    | 5.668537586        | -3.78356047  | 0.000304416 | 0.00249631       | -0.718245419 |
| MYL12B   | 0.172344694     | 7.758310137        | 3.783279083  | 0.000304706 | 0.002497328      | -0.693625633 |
| GNL1     | 0.113772943     | 6.700336968        | 3.7827211    | 0.000305282 | 0.002500688      | -0.72824621  |
| LRRCS7   | 0.137604718     | 3.473660738        | 3.782288147  | 0.000305729 | 0.002501774      | -0.5444022   |
| AP1AR    | -0.202311147    | 3.820026589        | -3.782111031 | 0.000305913 | 0.002501774      | -0.584924043 |
| RSBN1    | -0.35273966     | 3.909299609        | -3.782208237 | 0.000305812 | 0.002501774      | -0.614180431 |
| ISCU     | 0.175630201     | 6.726221609        | 3.780519833  | 0.000307564 | 0.002513913      | -0.735803408 |
| ANKRD50  | -0.443085048    | 5.388952753        | -3.780057875 | 0.000308045 | 0.002516479      | -0.702485413 |
| SRSF4    | -0.140643079    | 6.023767113        | -3.778588197 | 0.00030958  | 0.002527648      | -0.74236472  |
| UGP2     | -0.124424982    | 6.961433714        | -3.778261095 | 0.000309922 | 0.002529074      | -0.740239484 |
| SLC46A3  | -0.227044656    | 3.536748483        | -3.77801511  | 0.00031018  | 0.002529808      | -0.536058046 |
| P4HB     | 0.097508953     | 10.00204979        | 3.777475524  | 0.000310747 | 0.002533057      | -0.586369859 |
| STUB1    | 0.203785976     | 5.108505273        | 3.776907214  | 0.000311344 | 0.002536556      | -0.710316268 |
| SHROOM2  | -1.102188995    | -1.250475304       | -3.775075369 | 0.000313278 | 0.002550932      | 0.167345393  |
| DDX59    | 0.200230745     | 3.174670206        | 3.77340717   | 0.000315049 | 0.002563586      | -0.46334392  |
| RPP30    | 0.179278101     | 4.297869736        | 3.773291391  | 0.000315173 | 0.002563586      | -0.654513376 |
| RXFP1    | -0.692988646    | 0.42300431         | -3.771641017 | 0.000316935 | 0.002576529      | 0.014413362  |
| KNL1     | -0.772719129    | 1.70345132         | -3.770612537 | 0.000318038 | 0.002581316      | -0.244429178 |
| SCN1B    | 0.246163879     | 3.511155587        | 3.770662084  | 0.000317985 | 0.002581316      | -0.585817032 |
| MGAT4B   | 0.113278239     | 7.631135498        | 3.770828882  | 0.000317806 | 0.002581316      | -0.73994454  |
| SELENOK  | 0.220502829     | 4.23003612         | 3.770230582  | 0.000318448 | 0.002583256      | -0.675884056 |
| OAT      | 0.119733322     | 6.839568747        | 3.769878668  | 0.000318827 | 0.002584936      | -0.76380938  |
| PRMT6    | -0.118059369    | 4.726519232        | -3.769388318 | 0.000319355 | 0.002587827      | -0.717391531 |
| PPP2R5B  | 0.178902365     | 4.13071913         | 3.765827292  | 0.000323218 | 0.002617018      | -0.669807099 |
| MSX1     | -0.408040921    | 5.581025563        | -3.765747225 | 0.000323305 | 0.002617018      | -0.76417284  |
| HAUS8    | -0.279633008    | 1.762659267        | -3.765141666 | 0.000323967 | 0.002620963      | -0.286355637 |
| FAM19A3  | 0.698185771     | -1.262328266       | 3.763033349  | 0.000326279 | 0.002638258      | 0.055726494  |
| CLOCK    | -0.331713112    | 4.919103238        | -3.761338415 | 0.00032815  | 0.002651961      | -0.750850455 |
| EXO1     | -0.428551552    | 1.611178508        | -3.761145915 | 0.000328363 | 0.00265226       | -0.302882768 |
| APOBEC3C | 0.176173149     | 6.219214999        | 3.760613227  | 0.000328954 | 0.002655606      | -0.800890507 |
| KIAA0232 | -0.475247214    | 5.419633019        | -3.759471918 | 0.000330222 | 0.002664417      | -0.783469524 |
| ZNF524   | 0.265378586     | 4.272103714        | 3.756759391  | 0.000333256 | 0.002686616      | -0.700922668 |
| SEPT7    | 0.085148832     | 7.540776204        | 3.756692962  | 0.000333333 | 0.002686616      | -0.787541156 |
| TRPC6    | -1.112437414    | -0.993977741       | -3.75599412  | 0.000334116 | 0.002690466      | 0.080244455  |
| AKAP8L   | -0.212538999    | 4.601314544        | -3.755950755 | 0.000334165 | 0.002690466      | -0.748923976 |
| MAGED2   | 0.126680417     | 7.384309912        | 3.755744639  | 0.000334397 | 0.002690897      | -0.797700466 |
| PER3     | -0.227131584    | 3.841174059        | -3.753665662 | 0.000336748 | 0.002708365      | -0.685587914 |
| SMYD4    | 0.184114044     | 2.515640738        | 3.753048517  | 0.000337448 | 0.002712553      | -0.512664162 |
| ZNF551   | -0.251713357    | 2.388069497        | -3.752321125 | 0.000338276 | 0.002717084      | -0.45206194  |
| FBRS     | 0.119392283     | 5.970577001        | 3.752236292  | 0.000338373 | 0.002717084      | -0.82123193  |
| LBH      | -0.284960031    | 6.052272862        | -3.750630358 | 0.000340208 | 0.002730362      | -0.826185401 |
| GNA11    | 0.099631905     | 6.391579946        | 3.747510281  | 0.0003438   | 0.002757721      | -0.84316442  |
| THBD     | -0.424663391    | 5.224645924        | -3.746404936 | 0.000345081 | 0.002764829      | -0.816793717 |
| ARHGAP12 | -0.232572648    | 5.939040469        | -3.746271023 | 0.000345237 | 0.002764829      | -0.839456276 |
| CLEC11A  | 0.261981122     | 6.093782873        | 3.746306195  | 0.000345196 | 0.002764829      | -0.843044646 |
| LRRCS14  | -0.172238934    | 4.100163217        | -3.745535195 | 0.000346092 | 0.00277021       | -0.750598321 |
| SGO2     | -0.314589393    | 2.750130244        | -3.743258399 | 0.000348753 | 0.002790025      | -0.514629002 |
| LRCH1    | -0.182093647    | 4.130630219        | -3.741220635 | 0.000351151 | 0.002807717      | -0.766258771 |
| E2F8     | -0.712349701    | -0.715361117       | -3.740587396 | 0.000351899 | 0.002812209      | -0.027700675 |
| FAM129C  | -0.90564232     | -2.767849929       | -3.739927671 | 0.000352681 | 0.002816958      | 0.091068226  |
| FBRSL1   | 0.158076165     | 4.821798694        | 3.738920245  | 0.000353877 | 0.002825015      | -0.81407058  |
| FBXL15   | 0.310076456     | 2.576941669        | 3.738414096  | 0.000354479 | 0.002825966      | -0.515513309 |
| C6orf47  | -0.134048291    | 4.195859606        | -3.738347397 | 0.000354559 | 0.002825966      | -0.783674593 |

| Gene      | Log fold change | Average Expression | t            | P-value     | Adjusted P-value | B            |
|-----------|-----------------|--------------------|--------------|-------------|------------------|--------------|
| FASTKD2   | -0.171397837    | 4.684228162        | -3.73852965  | 0.000354342 | 0.002825966      | -0.81802926  |
| PFKP      | 0.151991082     | 5.715942624        | 3.737629264  | 0.000355416 | 0.002831296      | -0.865928715 |
| BCLAF1    | -0.135895263    | 6.371033063        | -3.73645118  | 0.000356825 | 0.002841023      | -0.878564174 |
| GBP5      | -0.656592968    | -0.822413087       | -3.736058071 | 0.000357297 | 0.002843275      | -0.000116979 |
| FBXL8     | 0.301181037     | 1.469256932        | 3.735787121  | 0.000357622 | 0.002844361      | -0.387885253 |
| IL6R      | -0.374286203    | 3.176895308        | -3.735540898 | 0.000357918 | 0.002845213      | -0.659125581 |
| ANKRD10   | -0.196152696    | 4.017134949        | -3.735000011 | 0.000358569 | 0.002848883      | -0.765292626 |
| C22orf29  | -0.205763879    | 4.402367796        | -3.734566048 | 0.000359092 | 0.002851535      | -0.777073079 |
| DTX4      | -0.457700758    | 1.888107559        | -3.731816925 | 0.000362422 | 0.002876464      | -0.472905592 |
| KIDINS220 | -0.266483936    | 6.593338291        | -3.731410753 | 0.000362917 | 0.002878872      | -0.893584301 |
| KIAA1841  | -0.214725713    | 2.714012615        | -3.730884565 | 0.000363558 | 0.002882443      | -0.578551479 |
| B3GNT5    | -0.529235598    | 1.986153596        | -3.728845275 | 0.000366055 | 0.002900712      | -0.481822339 |
| NXPH4     | 0.278009275     | 2.88423744         | 3.726397025  | 0.000369074 | 0.002923099      | -0.613307683 |
| TIFA      | -0.19810656     | 2.547158037        | -3.72534553  | 0.000370378 | 0.002931885      | -0.613155346 |
| NRG2      | 0.962125112     | -2.442306532       | 3.724070799  | 0.000371965 | 0.002941668      | 0.029457563  |
| IQCH-AS1  | -0.25196494     | 2.40671137         | -3.724038868 | 0.000372005 | 0.002941668      | -0.524176704 |
| IQGAP3    | -0.469027574    | 2.62611247         | -3.723611669 | 0.000372538 | 0.002943514      | -0.519599626 |
| WDR37     | -0.309358916    | 4.431369237        | -3.723538869 | 0.000372629 | 0.002943514      | -0.839075268 |
| ZNF778    | -0.325288982    | 1.995276026        | -3.723050701 | 0.000373239 | 0.00294679       | -0.503362093 |
| LRRFIP1   | -0.137132156    | 6.573507517        | -3.722791288 | 0.000373564 | 0.002947809      | -0.91733916  |
| XIAP      | -0.460738901    | 4.653415011        | -3.721954373 | 0.000374613 | 0.002954543      | -0.854836285 |
| SOCS3     | 0.572158086     | 5.479201848        | 3.719913902  | 0.000377184 | 0.00297326       | -0.894914184 |
| PPP1R18   | -0.149709996    | 7.447912329        | -3.719353067 | 0.000377893 | 0.002977295      | -0.917963361 |
| CXorf23   | -0.226547928    | 2.716494753        | -3.719042707 | 0.000378287 | 0.002977367      | -0.634207874 |
| DDX42     | -0.090223733    | 6.90525154         | -3.718948118 | 0.000378407 | 0.002977367      | -0.927966405 |
| ZMAT2     | 0.10466844      | 6.306969379        | 3.718877882  | 0.000378496 | 0.002977367      | -0.934211675 |
| KRIT1     | -0.183228008    | 4.207953914        | -3.718369406 | 0.000379141 | 0.002980887      | -0.843942699 |
| ADIPOR2   | -0.237134137    | 6.067103656        | -3.71809724  | 0.000379487 | 0.002982049      | -0.935938696 |
| B4GAT1    | 0.144433999     | 5.168786311        | 3.717824103  | 0.000379834 | 0.002982569      | -0.904315959 |
| SEC61B    | 0.224292894     | 6.098193787        | 3.717733953  | 0.000379949 | 0.002982569      | -0.936281079 |
| TRIB2     | -0.303612806    | 5.096596276        | -3.717140772 | 0.000380705 | 0.002986945      | -0.881072853 |
| CBX2      | -0.445644361    | 0.174233429        | -3.716910788 | 0.000380998 | 0.00298769       | -0.301059555 |
| CPZ       | 0.338474137     | 1.136887272        | 3.715562406  | 0.000382722 | 0.002995091      | -0.377072775 |
| FUT11     | -0.179391465    | 4.945652816        | -3.715395848 | 0.000382936 | 0.002995091      | -0.909696062 |
| SLC9A9    | -0.235137753    | 5.559864873        | -3.715641635 | 0.000382621 | 0.002995091      | -0.921646431 |
| EEF1D     | 0.189782834     | 6.371070631        | 3.715875741  | 0.000382321 | 0.002995091      | -0.943829314 |
| DNAJC3    | -0.285970976    | 6.369051041        | -3.715530789 | 0.000382763 | 0.002995091      | -0.94489811  |
| HPRT1     | 0.191759371     | 4.2926419          | 3.714072516  | 0.000384636 | 0.00300683       | -0.855120344 |
| SPIN1     | -0.27701917     | 6.468882843        | -3.713728816 | 0.000385079 | 0.00300873       | -0.950028302 |
| CCDC102A  | 0.249848147     | 3.690003772        | 3.713268432  | 0.000385673 | 0.003010248      | -0.774552077 |
| MEM185B   | -0.224715307    | 4.666702005        | -3.713276725 | 0.000385662 | 0.003010248      | -0.885999953 |
| TMAP3K7   | -0.159049918    | 6.010043757        | -3.71105097  | 0.000388546 | 0.0030311        | -0.957981609 |
| SLC25A22  | -0.188756897    | 4.694653487        | -3.710762173 | 0.000388922 | 0.003032461      | -0.913973669 |
| PPP3CB    | -0.121442985    | 6.748162968        | -3.710405604 | 0.000389386 | 0.00303451       | -0.960158636 |
| RABGAP1L  | -0.109330154    | 4.500055607        | -3.709034654 | 0.000391176 | 0.003046884      | -0.888181323 |
| NFIL3     | 0.22532998      | 5.801989246        | 3.708834479  | 0.000391438 | 0.003047349      | -0.947510269 |
| ISYNA1    | 0.235300431     | 3.69154865         | 3.707501907  | 0.000393186 | 0.003058309      | -0.79282745  |
| HIC1      | -0.238915314    | 5.6249989          | -3.707452255 | 0.000393252 | 0.003058309      | -0.95356244  |
| CTU2      | 0.219557861     | 3.590548954        | 3.706923798  | 0.000393947 | 0.003062137      | -0.797749308 |
| PAPD7     | -0.292795179    | 4.09578995         | -3.706193423 | 0.000394911 | 0.003068042      | -0.871751446 |
| SDF4      | 0.161468583     | 8.067884065        | 3.706037398  | 0.000395117 | 0.00306806       | -0.927729734 |
| RSRC1     | -0.15634751     | 4.755138161        | -3.705769869 | 0.00039547  | 0.003069224      | -0.903561035 |
| NUP188    | 0.151446913     | 6.441077637        | 3.705604231  | 0.000395689 | 0.003069343      | -0.975158877 |
| GMFB      | -0.310883056    | 6.314656246        | -3.702159216 | 0.000400272 | 0.003103292      | -0.987324036 |
| RABGGTB   | 0.165858461     | 4.330407765        | 3.701125576  | 0.000401657 | 0.003112426      | -0.897011226 |
| AMIGO2    | -0.351703704    | 2.876548319        | -3.700552932 | 0.000402426 | 0.003115181      | -0.640165383 |
| VDAC1     | 0.122049401     | 6.921008979        | 3.700574346  | 0.000402397 | 0.003115181      | -0.986621781 |
| MIER1     | -0.134058292    | 5.456200614        | -3.700394026 | 0.000402639 | 0.003115234      | -0.970810984 |
| KATNAL2   | -0.265020709    | 1.690975473        | -3.700197576 | 0.000402904 | 0.003115679      | -0.474699176 |
| ID3       | 0.439205211     | 5.613528326        | 3.69995365   | 0.000403232 | 0.003116619      | -0.937045102 |
| RTL9      | -0.821434362    | -2.170446348       | -3.699411503 | 0.000403963 | 0.003120666      | -0.030950009 |
| DUS2      | 0.185286289     | 2.788009318        | 3.699194514  | 0.000404256 | 0.003121328      | -0.725973769 |
| OPA1      | -0.183929966    | 5.872616139        | -3.697851781 | 0.000406073 | 0.00313375       | -0.996544691 |
| EBF2      | -0.557208919    | 2.106258751        | -3.697158437 | 0.000407014 | 0.003139405      | -0.558431658 |
| TES       | -0.280102298    | 3.133756485        | -3.69685097  | 0.000407432 | 0.003141021      | -0.776819512 |
| CHST14    | 0.127100269     | 5.909258369        | 3.696143765  | 0.000408395 | 0.003146835      | -1.000332046 |
| CEP290    | -0.227453758    | 3.462879633        | -3.695298266 | 0.000409549 | 0.003154116      | -0.782667189 |
| DDI2      | -0.279302417    | 4.570503237        | -3.69462509  | 0.000410471 | 0.003159595      | -0.965229034 |
| NLN       | -0.184392089    | 5.134065621        | -3.693934562 | 0.000411418 | 0.003165268      | -0.993940164 |
| GFER      | 0.22136091      | 3.237679104        | 3.693269514  | 0.000412332 | 0.003170681      | -0.786929056 |

| Gene      | Log fold change | Average Expression | t            | P-value     | Adjusted P-value | B            |
|-----------|-----------------|--------------------|--------------|-------------|------------------|--------------|
| IGFL3     | 1.135429945     | -3.69679767        | 3.691186613  | 0.000415207 | 0.003190704      | -0.054210116 |
| OTUD4     | -0.303504611    | 4.878128453        | -3.691076701 | 0.000415359 | 0.003190704      | -0.986502257 |
| NUS1      | -0.192124528    | 4.200855689        | -3.690605619 | 0.000416012 | 0.003194092      | -0.924748104 |
| GPR3      | -0.553054597    | 0.166128515        | -3.688659697 | 0.000418721 | 0.003213249      | -0.185699897 |
| ACAP2     | -0.228945648    | 5.786501239        | -3.688182815 | 0.000419387 | 0.003216724      | -1.025274536 |
| NPM1      | 0.166977172     | 8.004633134        | 3.688001121  | 0.000419641 | 0.003217035      | -0.987224137 |
| TTI1      | 0.160123284     | 4.141844402        | 3.687793214  | 0.000419932 | 0.003217628      | -0.930275226 |
| JUNB      | 0.477062461     | 6.337617529        | 3.687427848  | 0.000420444 | 0.003219912      | -1.023945256 |
| AR SJ     | -0.309328992    | 4.000690519        | -3.687250398 | 0.000420693 | 0.00322018       | -0.881188742 |
| C12orf49  | -0.234533042    | 5.960099709        | -3.686911559 | 0.000421168 | 0.003222182      | -1.033159267 |
| PSMC6     | 0.116661781     | 4.762919141        | 3.686534649  | 0.000421698 | 0.003224595      | -0.984753209 |
| ING2      | -0.246269044    | 3.252382284        | -3.682976988 | 0.000426727 | 0.003261395      | -0.80969494  |
| GMPS      | -0.113134296    | 6.378701753        | -3.682616383 | 0.000427239 | 0.003263659      | -1.049290969 |
| FBXL19    | 0.155529228     | 3.903546725        | 3.682012112  | 0.0004281   | 0.003268577      | -0.951845056 |
| EBNA1BP2  | 0.17133429      | 5.23148561         | 3.681739821  | 0.000428489 | 0.003268633      | -1.030654766 |
| ATP2B1    | -0.470583944    | 6.843180908        | -3.681702771 | 0.000428542 | 0.003268633      | -1.035328703 |
| DST       | -0.309305242    | 7.942679674        | -3.681525733 | 0.000428794 | 0.003268906      | -1.011935954 |
| FAM84B    | 1.18949019      | -1.886005954       | 3.681196257  | 0.000429265 | 0.003270839      | -0.095583611 |
| GPI       | 0.130133618     | 7.898670936        | 3.680348305  | 0.000430479 | 0.003278001      | -1.016884805 |
| DCAF10    | -0.164196799    | 5.411794681        | -3.680235879 | 0.00043064  | 0.003278001      | -1.03684451  |
| PSMB1     | 0.200982596     | 6.665475839        | 3.680056284  | 0.000430898 | 0.003278305      | -1.055848511 |
| DUT       | 0.160593107     | 5.443439514        | 3.679844041  | 0.000431202 | 0.003278966      | -1.03852881  |
| KNOP1     | -0.163169134    | 3.037104652        | -3.679400039 | 0.00043184  | 0.00328216       | -0.815097006 |
| CYP4V2    | -0.156628701    | 4.624791229        | -3.678961595 | 0.000432471 | 0.003285297      | -0.991429282 |
| DUSP1     | 0.495950415     | 5.323536731        | 3.678580479  | 0.00043302  | 0.00328781       | -1.004506054 |
| RWDD2B    | 0.208034123     | 4.479696959        | 3.676204089  | 0.000436459 | 0.003312248      | -0.972911981 |
| COX10-AS1 | -0.350318099    | 0.229094861        | -3.675450563 | 0.000437554 | 0.00331329       | -0.323559636 |
| SLC39A3   | 0.228790373     | 4.243547751        | 3.675660472  | 0.000437249 | 0.00331329       | -0.966822085 |
| PCBP4     | 0.16736458      | 5.192729423        | 3.675613604  | 0.000437317 | 0.00331329       | -1.037774269 |
| TRIM8     | -0.197978128    | 7.375398702        | -3.675411234 | 0.000437612 | 0.00331329       | -1.066052129 |
| PSME1     | 0.181351513     | 6.693123923        | 3.675353549  | 0.000437696 | 0.00331329       | -1.071136659 |
| FAM109A   | -0.155694629    | 4.534413758        | -3.672750738 | 0.000441502 | 0.003340423      | -0.997773304 |
| VTI1A     | -0.142726053    | 4.404171187        | -3.672342011 | 0.000442102 | 0.003343288      | -0.990666877 |
| TPM3      | 0.100966617     | 7.567959467        | 3.671029079  | 0.000444037 | 0.003356231      | -1.056616077 |
| ZNF566    | -0.297737402    | 2.91586506         | -3.670659136 | 0.000444583 | 0.003357126      | -0.859849651 |
| TCEAL3    | 0.243026609     | 4.179444809        | 3.670592569  | 0.000444682 | 0.003357126      | -0.977426212 |
| LRRC58    | -0.312098748    | 6.185858313        | -3.670496419 | 0.000444824 | 0.003357126      | -1.087079888 |
| NPHP1     | -0.215809105    | 2.216933845        | -3.670008326 | 0.000445546 | 0.003360894      | -0.612598479 |
| LINC01686 | 0.725558251     | -2.033962841       | 3.66874932   | 0.000447415 | 0.00337197       | -0.135472527 |
| PPM1F     | -0.127083751    | 5.294571103        | -3.668717449 | 0.000447462 | 0.00337197       | -1.052044488 |
| CRKL      | -0.221746814    | 6.175590327        | -3.668561144 | 0.000447694 | 0.003372035      | -1.093263599 |
| SART1     | 0.208137018     | 6.448224005        | 3.668077704  | 0.000448414 | 0.003375769      | -1.095077092 |
| NR2F6     | 0.199810467     | 4.563286301        | 3.667918595  | 0.000448652 | 0.003375867      | -1.024977003 |
| MB21D1    | -0.308332481    | 1.417670612        | -3.667503387 | 0.000449271 | 0.003378841      | -0.60170999  |
| UBA3      | -0.110169496    | 5.229684686        | -3.66548746  | 0.00045229  | 0.00339985       | -1.071016138 |
| ZNF239    | -0.286199332    | 1.382257286        | -3.664727139 | 0.000453434 | 0.003406662      | -0.556413793 |
| ARRHGAP1  | 0.122620951     | 7.889616429        | 3.664584617  | 0.000453649 | 0.003406662      | -1.065108165 |
| YY1       | -0.106471593    | 6.925073282        | -3.664312797 | 0.000454058 | 0.00340804       | -1.099020418 |
| PICALM    | -0.198204022    | 7.71003092         | -3.663070586 | 0.000455935 | 0.003420424      | -1.072888255 |
| NDUFS3    | 0.246351935     | 5.249450791        | 3.662767107  | 0.000456395 | 0.003422168      | -1.079901382 |
| ELOA      | -0.195868943    | 5.499537878        | -3.662044658 | 0.000457491 | 0.003427047      | -1.094045437 |
| CKAP5     | 0.220581249     | 6.776980433        | 3.662038362  | 0.000457501 | 0.003427047      | -1.109453568 |
| MYADM     | -0.220956052    | 7.413165802        | -3.66178879  | 0.00045788  | 0.003428183      | -1.093333991 |
| APBA3     | 0.23997385      | 3.233606158        | 3.660735381  | 0.000459484 | 0.003438483      | -0.851467839 |
| SIK3      | -0.290527363    | 4.855741306        | -3.660236755 | 0.000460245 | 0.003442469      | -1.065483025 |
| A4GALT    | 0.175130985     | 6.119492771        | 3.658312881  | 0.000463193 | 0.003462798      | -1.123552934 |
| BAG4      | -0.168681865    | 3.976315167        | -3.658051096 | 0.000463595 | 0.003464088      | -1.017699548 |
| SYBU      | -0.486096518    | 1.748972468        | -3.657773568 | 0.000464023 | 0.00346556       | -0.501447692 |
| CUL7      | -0.134970417    | 6.204979144        | -3.65752182  | 0.000464441 | 0.003466737      | -1.125895035 |
| ZNF674    | -0.34668818     | 0.878530875        | -3.655516238 | 0.00046751  | 0.003488149      | -0.484746416 |
| GTF2E2    | 0.183016421     | 4.906275539        | 3.655165942  | 0.000468054 | 0.003490475      | -1.084173991 |
| TRPM7     | -0.251089551    | 5.827134773        | -3.654068834 | 0.000469759 | 0.003501463      | -1.135300387 |
| PODXL     | -0.38466531     | 4.322985651        | -3.653509744 | 0.000470631 | 0.003506225      | -1.059258569 |
| RTN4R     | 1.032280192     | -2.966679715       | 3.652788787  | 0.000471757 | 0.003512878      | -0.163351873 |
| CCDC102B  | -0.46724654     | 2.131542411        | -3.652520237 | 0.000472178 | 0.00351427       | -0.669922391 |
| ROCK1     | -0.399922865    | 6.169854438        | -3.652234191 | 0.000472625 | 0.003515867      | -1.144017337 |
| CEP135    | -0.330379755    | 2.370517042        | -3.652036154 | 0.000472936 | 0.003516439      | -0.709482859 |
| EVA1A     | -0.311060822    | 4.040942249        | -3.650275062 | 0.000475704 | 0.003535278      | -0.958618711 |
| HOOK2     | -0.188960203    | 2.827851331        | -3.649603896 | 0.000476763 | 0.003537913      | -0.820201084 |
| RHOBTB2   | -0.123714309    | 4.862865882        | -3.649664905 | 0.000476667 | 0.003537913      | -1.101630077 |

| Gene         | Log fold change | Average Expression | t            | P-value     | Adjusted P-value | B            |
|--------------|-----------------|--------------------|--------------|-------------|------------------|--------------|
| SCRN1        | -0.204290485    | 7.39064579         | -3.64961271  | 0.000476749 | 0.003537913      | -1.134839944 |
| RPRD2        | 0.155240358     | 5.607265704        | 3.647563728  | 0.000479997 | 0.003560152      | -1.153841304 |
| ORC1         | -0.480636186    | 0.691455883        | -3.646286587 | 0.000482031 | 0.003573483      | -0.522693047 |
| FEN1         | -0.216271267    | 4.05336547         | -3.646098047 | 0.000482332 | 0.003573956      | -1.052508445 |
| PHF21A       | 0.18874477      | 5.12586995         | 3.645905666  | 0.00048264  | 0.003574475      | -1.129012101 |
| IFI16        | -0.132883536    | 8.343996348        | -3.645520816 | 0.000483255 | 0.003577275      | -1.109842797 |
| ACSF3        | 0.239578756     | 4.044476897        | 3.644875881  | 0.000484288 | 0.003583161      | -1.028327491 |
| SOWAHC       | -0.260914622    | 4.613073255        | -3.644568234 | 0.000484782 | 0.003585051      | -1.045099294 |
| TALDO1       | 0.162892534     | 6.876372072        | 3.643227168  | 0.000486938 | 0.003599235      | -1.168821741 |
| C2CD3        | 0.2188402       | 3.703373678        | 3.641243628  | 0.000490145 | 0.003619388      | -1.016821983 |
| TRIP4        | 0.10932352      | 4.10445108         | 3.641353633  | 0.000489967 | 0.003619388      | -1.054153221 |
| SHF          | 0.291894398     | 2.182869901        | 3.640679679  | 0.000491061 | 0.003624371      | -0.758629036 |
| PSMA6        | 0.209502666     | 3.041585888        | 3.640469404  | 0.000491403 | 0.003625117      | -0.935841166 |
| RPS6KB2      | 0.201188593     | 4.361559701        | 3.639851155  | 0.000492409 | 0.003630761      | -1.086344624 |
| FBXO6        | 0.255848269     | 2.875606335        | 3.639412682  | 0.000493123 | 0.003634252      | -0.881785502 |
| RFFL         | -0.204397135    | 2.141976211        | -3.639034185 | 0.000493741 | 0.003635248      | -0.795299569 |
| HSD17B10     | 0.207069262     | 4.829590221        | 3.639043151  | 0.000493727 | 0.003635248      | -1.131996417 |
| EPS8L2       | 0.203157818     | 5.347554253        | 3.638709205  | 0.000494272 | 0.00363738       | -1.154813856 |
| GIMAP2       | 0.309965916     | 1.522767657        | 3.638309502  | 0.000494926 | 0.003640413      | -0.657795337 |
| ADNP         | -0.168912357    | 6.338062392        | -3.637886257 | 0.000495619 | 0.003643733      | -1.189761409 |
| GCNT1        | -0.352827006    | 4.144926818        | -3.637398501 | 0.000496419 | 0.003647835      | -1.08177589  |
| RAD51B       | -0.194942229    | 2.108739784        | -3.636956234 | 0.000497146 | 0.003651393      | -0.74268413  |
| CEP83        | 0.243858644     | 2.592401383        | 3.636424832  | 0.00049802  | 0.003655552      | -0.88676221  |
| TNRC6B       | 0.21662456      | 5.035963896        | 3.636317137  | 0.000498198 | 0.003655552      | -1.163047834 |
| PSPN         | 0.284622309     | 1.971980278        | 3.635651549  | 0.000499295 | 0.003661821      | -0.741224955 |
| ACER3        | -0.224227286    | 4.240749622        | -3.635450918 | 0.000499626 | 0.003662467      | -1.103729086 |
| GNG5         | 0.151954441     | 5.884153976        | 3.634885696  | 0.000500561 | 0.003667532      | -1.193553252 |
| RAB36        | -0.240295553    | 2.782679183        | -3.634463818 | 0.000501259 | 0.00366908       | -0.903489911 |
| FAM120B      | -0.140667763    | 5.333834922        | -3.634569379 | 0.000501084 | 0.00366908       | -1.174905974 |
| TRIM47       | -0.310860333    | 4.790896977        | -3.630849882 | 0.000507281 | 0.003711353      | -1.16785393  |
| RPL28        | 0.272678857     | 9.710130806        | 3.629159955  | 0.00051012  | 0.003730314      | -1.083657173 |
| INIP         | -0.221332821    | 4.594262352        | -3.628032507 | 0.000512023 | 0.003742411      | -1.153872059 |
| HRAS         | 0.256200082     | 4.744966714        | 3.627597406  | 0.000512759 | 0.003745973      | -1.158681523 |
| STAR3NL      | -0.161276383    | 4.286532781        | -3.627318498 | 0.000513231 | 0.003747607      | -1.11390376  |
| TMC7         | 0.444835043     | -0.248817321       | 3.626758827  | 0.00051418  | 0.003751136      | -0.439137652 |
| SOD3         | 0.327259761     | 7.19633116         | 3.626739795  | 0.000514212 | 0.003751136      | -1.21330372  |
| OXR1         | -0.233140383    | 5.092676662        | -3.626244051 | 0.000515055 | 0.003753644      | -1.197190908 |
| SEC22C       | -0.184892751    | 5.585333474        | -3.626364285 | 0.00051485  | 0.003753644      | -1.214185526 |
| FTSJ3        | 0.120106677     | 5.817856805        | 3.624572039  | 0.000517905 | 0.003772589      | -1.223560464 |
| ST6GAL1      | 0.431724616     | 0.761398763        | 3.623935607  | 0.000518993 | 0.003778693      | -0.588813741 |
| TUBA1B       | 0.153038209     | 5.975300953        | 3.622312043  | 0.000521781 | 0.003797152      | -1.23673378  |
| TMED9        | 0.168250638     | 7.328249426        | 3.621897768  | 0.000522494 | 0.003800508      | -1.222372716 |
| PALM2        | -0.666502813    | 0.68488533         | -3.62134714  | 0.000523444 | 0.003805579      | -0.668274545 |
| ATXN7L3B     | -0.087247565    | 6.368388381        | -3.620945047 | 0.000524139 | 0.003808791      | -1.242992828 |
| NXN          | 0.201177355     | 6.236071406        | 3.620752992  | 0.000524471 | 0.003809366      | -1.241463657 |
| SMNDC1       | -0.162572494    | 4.763821767        | -3.620369974 | 0.000525133 | 0.003812342      | -1.192595548 |
| GYS1         | 0.102787086     | 5.504048977        | 3.620062176  | 0.000525667 | 0.003814376      | -1.23104178  |
| PROB1        | -0.3546952      | 1.816631984        | -3.6197327   | 0.000526238 | 0.003816683      | -0.76380253  |
| ZNF710-AS1   | 0.388928254     | 0.877530417        | 3.618999854  | 0.000527511 | 0.003822799      | -0.612199099 |
| C3orf58      | -0.213350656    | 4.484756733        | -3.618809301 | 0.000527843 | 0.003822799      | -1.142614996 |
| OGFRL1       | -0.315789197    | 5.427515963        | -3.618842202 | 0.000527785 | 0.003822799      | -1.2311166   |
| HADHB        | 0.100363402     | 7.160219206        | 3.617908578  | 0.000529412 | 0.003832324      | -1.241198359 |
| NAMPT        | -0.277515083    | 6.491049589        | -3.617739381 | 0.000529708 | 0.00383262       | -1.249108853 |
| LOC101928053 | -0.830274799    | -2.330120866       | -3.617306369 | 0.000530464 | 0.003835482      | -0.27002228  |
| NDUFA8       | 0.160223474     | 4.460542595        | 3.617221639  | 0.000530612 | 0.003835482      | -1.165632226 |
| SLC22A15     | -0.31966907     | 2.009207023        | -3.616272254 | 0.000532275 | 0.003845655      | -0.829452746 |
| ARMCX6       | 0.13277257      | 4.075710992        | 3.615551181  | 0.000533541 | 0.003852956      | -1.145535359 |
| WDR18        | 0.249082178     | 4.785103201        | 3.613811537  | 0.000536608 | 0.003873245      | -1.205863271 |
| RTL3         | -0.781204239    | -1.789153179       | -3.612759324 | 0.000538471 | 0.00388483       | -0.316060842 |
| FAM173A      | 0.339913324     | 3.229243435        | 3.612312192  | 0.000539264 | 0.003888692      | -1.020907677 |
| CCT3         | 0.129868158     | 7.753541949        | 3.611985897  | 0.000539844 | 0.00389101       | -1.236810278 |
| PSMC2        | 0.135068655     | 6.331468364        | 3.610589208  | 0.000542332 | 0.003907076      | -1.275186132 |
| SUMO3        | 0.117229392     | 7.072867855        | 3.610284588  | 0.000542877 | 0.003909127      | -1.265965353 |
| TAOK1        | -0.446900949    | 6.673080157        | -3.609031248 | 0.000545121 | 0.003923412      | -1.274835766 |
| SLC2A6       | 0.23341535      | 4.194463355        | 3.607131093  | 0.00054854  | 0.003946138      | -1.204906517 |
| NUMB         | 0.130634703     | 6.059045549        | 3.606346497  | 0.000549958 | 0.003954449      | -1.286629809 |
| NBPF15       | -0.418792586    | 2.281451441        | -3.601782971 | 0.000558274 | 0.004012147      | -0.933286963 |
| RUFY2        | -0.206585869    | 4.133214402        | -3.60158885  | 0.000558631 | 0.004012147      | -1.188374253 |
| RNF40        | 0.123630196     | 6.398580378        | 3.601506722  | 0.000558782 | 0.004012147      | -1.303376715 |
| CCDC88A      | -0.279918613    | 5.12992299         | -3.601255048 | 0.000559244 | 0.004013555      | -1.273820442 |

| Gene          | Log fold change | Average Expression | t            | P-value     | Adjusted P-value | B            |
|---------------|-----------------|--------------------|--------------|-------------|------------------|--------------|
| REPS2         | -0.393677713    | 1.461141749        | -3.600512277 | 0.000560611 | 0.004020333      | -0.754713097 |
| GTDC1         | -0.113541289    | 4.542091356        | -3.60030715  | 0.000560989 | 0.004020333      | -1.221781679 |
| ALG3          | 0.168377658     | 5.236578846        | 3.600374836  | 0.000560864 | 0.004020333      | -1.280452162 |
| ARHGEF12      | -0.354226921    | 7.37081581         | -3.60065102  | 0.000561436 | 0.004021619      | -1.285645723 |
| ITFG2         | 0.155515385     | 3.735882407        | 3.599306332  | 0.000562837 | 0.004029744      | -1.170030329 |
| SMAD2         | -0.084618734    | 6.699627375        | -3.598868874 | 0.000563647 | 0.004033623      | -1.309854348 |
| STARD9        | 0.350183988     | 2.480107704        | 3.598676963  | 0.000564002 | 0.004034251      | -1.027551734 |
| CDK13         | -0.188386943    | 5.468153652        | -3.598069563 | 0.000565129 | 0.004040392      | -1.293062721 |
| GRIN2D        | 0.237774838     | 3.994546724        | 3.597701411  | 0.000565813 | 0.004043363      | -1.177822687 |
| FAM83D        | -0.394912618    | 1.944522417        | -3.596249843 | 0.000568517 | 0.004059107      | -0.85222087  |
| PSMC3         | 0.219093714     | 6.798342736        | 3.596229616  | 0.000568555 | 0.004059107      | -1.316297969 |
| P2RX5-TAX1BP3 | -0.592830255    | -1.042594546       | -3.595949368 | 0.000569079 | 0.00406092       | -0.407181723 |
| PLSCR1        | -0.162319868    | 4.718027814        | -3.595726035 | 0.000569496 | 0.004061975      | -1.263938093 |
| HAS3          | 0.822358942     | -1.67712824        | 3.595214247  | 0.000570454 | 0.004066883      | -0.358800991 |
| CYR61         | 0.942472955     | 7.172185715        | 3.594653397  | 0.000571506 | 0.004072452      | -1.303349462 |
| BNC1          | -0.354375054    | 3.921660165        | -3.593964487 | 0.0005728   | 0.004079649      | -1.162432462 |
| TRAF3         | -0.237308947    | 5.104016223        | -3.593827618 | 0.000573057 | 0.004079649      | -1.292575538 |
| CHPF          | 0.190988108     | 8.008471933        | 3.591154611  | 0.000578107 | 0.004113657      | -1.286750841 |
| RTTN          | 0.266274221     | 2.307343341        | 3.589284053  | 0.000581667 | 0.004137028      | -0.914065778 |
| GTF2F1        | 0.1327895       | 7.076808228        | 3.5890066    | 0.000582196 | 0.004138725      | -1.333692934 |
| NRAS          | -0.2034628      | 5.89588094         | -3.588803153 | 0.000582585 | 0.004138725      | -1.335828368 |
| SH3BP4        | -0.207948292    | 6.751646902        | -3.588727567 | 0.000582729 | 0.004138725      | -1.341408393 |
| MAP1LC3A      | 0.264161178     | 4.199291193        | 3.587163636  | 0.000585726 | 0.004158049      | -1.228712764 |
| SLC16A7       | -0.403324136    | 5.038564364        | -3.586556622 | 0.000586893 | 0.004164371      | -1.30065722  |
| GNPNAT1       | -0.329713082    | 4.827337306        | -3.586138363 | 0.000587699 | 0.004168123      | -1.304866554 |
| SPOP          | 0.095932746     | 5.599192332        | 3.585359177  | 0.000589202 | 0.004176819      | -1.341358828 |
| PELP1         | 0.145796057     | 5.941454846        | 3.584855728  | 0.000590175 | 0.004179784      | -1.351769609 |
| NDUFS1        | -0.144695315    | 6.033543904        | -3.584892174 | 0.000590105 | 0.004179784      | -1.35272357  |
| MICA          | 0.250643475     | 4.226614839        | 3.583746634  | 0.000592325 | 0.004193036      | -1.264141855 |
| FAM129B       | 0.128257366     | 8.731516394        | 3.580692274  | 0.000598283 | 0.004233223      | -1.274413124 |
| METTL14       | -0.125408229    | 4.335918817        | -3.580474547 | 0.00059871  | 0.004234254      | -1.27675168  |
| PINX1         | 0.294350052     | 2.189753086        | 3.580067826  | 0.000599508 | 0.00423791       | -0.985651371 |
| C6orf226      | 0.28701975      | 1.967321415        | 3.579106523  | 0.000601398 | 0.00424928       | -0.927155812 |
| ARHGAP6       | -0.323707942    | 3.446527653        | -3.578930447 | 0.000601745 | 0.004249738      | -1.156532644 |
| GOPC          | -0.185635266    | 5.188147742        | -3.577597665 | 0.000604377 | 0.004263325      | -1.339628127 |
| ABCC10        | 0.179767008     | 4.031343186        | 3.577071128  | 0.00060542  | 0.004271274      | -1.244918687 |
| EIF2AK4       | -0.136149526    | 6.467734011        | -3.576957504 | 0.000605645 | 0.004271274      | -1.379525289 |
| BAG6          | 0.100423729     | 7.873821161        | 3.576217805  | 0.000607114 | 0.004279626      | -1.344612879 |
| AHCTF1        | -0.234890088    | 4.034760832        | -3.575062649 | 0.000609413 | 0.004293828      | -1.271078967 |
| HSF1          | 0.157058399     | 6.387354282        | 3.574457574  | 0.000610621 | 0.004300328      | -1.38698365  |
| FAM208A       | -0.316257888    | 5.106893592        | -3.574265717 | 0.000611005 | 0.004301018      | -1.343917345 |
| C6orf132      | -0.253828103    | 4.228694502        | -3.572519882 | 0.000614505 | 0.004326326      | -1.271450848 |
| MRPL41        | 0.292255164     | 5.039242725        | 3.571720664  | 0.000616114 | 0.004332931      | -1.347393869 |
| STRBP         | -0.213626988    | 2.582459723        | -3.570694348 | 0.000618185 | 0.004343444      | -1.017279843 |
| RRP1B         | -0.215081368    | 5.831547713        | -3.570753674 | 0.000618065 | 0.004343444      | -1.395831351 |
| LY6E          | 0.227674486     | 8.883324815        | 3.57036233   | 0.000618857 | 0.004344506      | -1.310270932 |
| SLC11A2       | -0.280985519    | 5.189735133        | -3.570334544 | 0.000618913 | 0.004344506      | -1.377390236 |
| LIFR          | -0.425522034    | 4.309615615        | -3.569931359 | 0.00061973  | 0.004348211      | -1.311852646 |
| AGL           | -0.299930214    | 4.256305114        | -3.568391873 | 0.000622857 | 0.004368118      | -1.313978515 |
| DHX36         | -0.224078477    | 5.598697765        | -3.567366356 | 0.000624949 | 0.004380747      | -1.400384357 |
| CLP1          | 0.151764357     | 3.834240506        | 3.567098186  | 0.000625497 | 0.004382549      | -1.266543947 |
| PTGIS         | -0.206292186    | 8.933455483        | -3.566781892 | 0.000626143 | 0.004383004      | -1.31571256  |
| ZNF281        | -0.255470495    | 5.148538314        | -3.566811039 | 0.000626084 | 0.004383004      | -1.359750997 |
| HIVEP3        | -0.296309614    | 3.167710952        | -3.564169406 | 0.000631511 | 0.004416347      | -1.154170454 |
| WAC           | -0.136863237    | 6.66580173         | -3.564036188 | 0.000631786 | 0.004416347      | -1.417085747 |
| DLST          | -0.173452096    | 6.710247905        | -3.564075095 | 0.000631706 | 0.004416347      | -1.417963632 |
| PIGW          | -0.225371566    | 3.010101968        | -3.563551473 | 0.000632787 | 0.004421294      | -1.212934335 |
| OTUD6B        | -0.326472993    | 2.101854584        | -3.563168236 | 0.000633558 | 0.00442478       | -0.986694392 |
| SLC29A3       | 0.183778318     | 3.722881265        | 3.562613278  | 0.00063473  | 0.004430753      | -1.25334176  |
| NME2          | 0.235220512     | 4.256950776        | 3.562298352  | 0.000635383 | 0.004433258      | -1.309343595 |
| CNOT9         | -0.136766877    | 5.654598282        | -3.560937298 | 0.000638213 | 0.004450944      | -1.420322661 |
| PTGES2        | 0.227898723     | 5.068589329        | 3.56071506   | 0.000638676 | 0.004452113      | -1.388990254 |
| ACOT9         | -0.100753145    | 4.744485441        | -3.560462234 | 0.000639204 | 0.004453729      | -1.3804006   |
| STYX          | -0.195486062    | 4.33725848         | -3.56012     | 0.000639918 | 0.004456646      | -1.345629911 |
| VWA1          | 0.311253113     | 2.308761165        | 3.55956029   | 0.000641088 | 0.004462734      | -1.040842618 |
| FAM199X       | -0.330212518    | 3.660765809        | -3.559169416 | 0.000641907 | 0.004466367      | -1.280895801 |
| LRRK2         | -0.306297806    | 3.697537029        | -3.558760065 | 0.000642765 | 0.004470274      | -1.219639596 |
| ZC3H6         | 0.252793116     | 2.303811512        | 3.557748773  | 0.00064489  | 0.004482982      | -1.093916588 |
| TMEM232       | -0.418336287    | -0.073791475       | -3.557578385 | 0.000645249 | 0.004483407      | -0.62304242  |
| MPST          | 0.222984335     | 5.59476438         | 3.557121832  | 0.000646211 | 0.004488021      | -1.422188821 |

| Gene         | Log fold change | Average Expression | t            | P-value     | Adjusted P-value | B            |
|--------------|-----------------|--------------------|--------------|-------------|------------------|--------------|
| MBP          | -0.297986847    | 5.392287048        | -3.556102972 | 0.000648362 | 0.00450089       | -1.422621641 |
| DRAP1        | 0.264731189     | 6.853170723        | 3.554331818  | 0.000652119 | 0.004524883      | -1.44457738  |
| RSPRY1       | -0.149455779    | 5.020277954        | -3.552535959 | 0.000655949 | 0.004549363      | -1.415925786 |
| PHF10        | -0.120344615    | 4.503828054        | -3.55108287  | 0.000659064 | 0.00456722       | -1.373721495 |
| PAK1IP1      | -0.165367941    | 4.538035139        | -3.551052008 | 0.00065913  | 0.00456722       | -1.387095585 |
| KSR1         | 0.329462835     | 3.080993261        | 3.550020815  | 0.000661349 | 0.004580489      | -1.212079813 |
| MIGA2        | 0.173561532     | 3.662711559        | 3.549285306  | 0.000662936 | 0.004586909      | -1.297153277 |
| MTMR6        | -0.382658863    | 5.079664089        | -3.549352016 | 0.000662792 | 0.004586909      | -1.430271394 |
| ZDHHC7       | -0.138181021    | 6.726386739        | -3.549168022 | 0.00066319  | 0.004586909      | -1.464314874 |
| DAGLA        | -0.22256747     | 3.055441779        | -3.548608805 | 0.000664399 | 0.004593166      | -1.265582696 |
| ASB16-AS1    | 0.349105285     | 1.310781084        | 3.547148077  | 0.000667568 | 0.00461121       | -0.874665647 |
| CFAP97       | -0.41418697     | 5.670391886        | -3.547123682 | 0.000667621 | 0.00461121       | -1.463293206 |
| CDC37        | 0.14314556      | 6.965361074        | 3.546917562  | 0.00066807  | 0.004612193      | -1.46568309  |
| SCRN3        | -0.180975017    | 4.169192113        | -3.545385316 | 0.000671412 | 0.004633143      | -1.361976592 |
| FLRT2        | -0.252341396    | 6.931790448        | -3.544742366 | 0.000672819 | 0.004640728      | -1.471889693 |
| PKM          | 0.132795564     | 10.65965816        | 3.543447974  | 0.000675661 | 0.004658193      | -1.280402769 |
| SEMA7A       | -0.330296619    | 4.732776758        | -3.542367929 | 0.00067804  | 0.00467246       | -1.450214989 |
| ESCO1        | -0.362258392    | 3.539905333        | -3.541859566 | 0.000679163 | 0.004678057      | -1.314467714 |
| TNFRSF11B    | -0.303228949    | 5.035568748        | -3.541365665 | 0.000680256 | 0.004683441      | -1.423711036 |
| EIF5A        | 0.209741491     | 7.168839771        | 3.541112397  | 0.000680816 | 0.004685161      | -1.476731951 |
| MEM121       | 0.398384923     | 0.743407651        | 3.539645787  | 0.000684073 | 0.004703275      | -0.861300289 |
| MIEF1        | -0.210642109    | 5.728275309        | -3.539709209 | 0.000683932 | 0.004703275      | -1.487379444 |
| TTYH3        | 0.134353436     | 8.10045619         | 3.537389562  | 0.000689112 | 0.004734142      | -1.446244052 |
| TTC37        | -0.228585554    | 6.32015986         | -3.537213972 | 0.000689505 | 0.004734142      | -1.501287264 |
| MRPL37       | 0.145048954     | 6.419107607        | 3.537325272  | 0.000689256 | 0.004734142      | -1.501363967 |
| PRR13        | 0.135656622     | 4.294836751        | 3.536668387  | 0.00069073  | 0.004738619      | -1.399820284 |
| DRG1         | 0.126161817     | 5.537865608        | 3.536643053  | 0.000690786 | 0.004738619      | -1.489334954 |
| TSPAN5       | -0.306499148    | 6.059763102        | -3.535989309 | 0.000692256 | 0.004746541      | -1.503265074 |
| SIX4         | -0.297793636    | 3.898773199        | -3.535709702 | 0.000692886 | 0.004748696      | -1.385424906 |
| RGS10        | 0.213689349     | 5.289423628        | 3.534023831  | 0.000696693 | 0.00477262       | -1.483785627 |
| NHLRC3       | -0.233699609    | 3.590802255        | -3.532835328 | 0.00069939  | 0.004788911      | -1.335697858 |
| EMX2OS       | -0.196237291    | 6.808360217        | -3.531267641 | 0.000702961 | 0.004811179      | -1.518214571 |
| POLM         | 0.173786491     | 3.084189166        | 3.53062716   | 0.000704425 | 0.004817435      | -1.259231072 |
| TMEM200B     | -0.145927049    | 4.009529533        | -3.53058803  | 0.000704515 | 0.004817435      | -1.39223568  |
| ALDH18A1     | 0.103262633     | 7.053608694        | 3.528879216  | 0.000708436 | 0.004820407      | -1.513803881 |
| FAM76B       | -0.282027048    | 2.251743325        | -3.528159505 | 0.000710093 | 0.004851175      | -1.139877896 |
| ARHGEF1      | 0.152032665     | 5.504353187        | 3.527398028  | 0.000711851 | 0.004860979      | -1.50853804  |
| HSDL2        | 0.101533528     | 5.7195862          | 3.52703798   | 0.000712683 | 0.004863893      | -1.522923158 |
| MYBBP1A      | 0.11421938      | 6.157068329        | 3.526934301  | 0.000712923 | 0.004863893      | -1.533335756 |
| DDX60L       | -0.247447499    | 4.369156137        | -3.525648787 | 0.000715904 | 0.004880322      | -1.449008081 |
| GPR161       | -0.216777354    | 5.056771922        | -3.525616472 | 0.000715979 | 0.004880322      | -1.499996889 |
| A2M-AS1      | -0.479140104    | -0.473985257       | -3.524973343 | 0.000717475 | 0.004888307      | -0.679172141 |
| CCDC121      | 0.346283249     | 0.445252795        | 3.524618081  | 0.000718303 | 0.004891733      | -0.838860043 |
| SCN8A        | -0.335845542    | 3.370237799        | -3.52424506  | 0.000719173 | 0.004895444      | -1.353976859 |
| ZNF195       | 0.161263735     | 3.50271428         | 3.523585517  | 0.000720713 | 0.004903715      | -1.350079843 |
| URGCP        | -0.147929351    | 5.101937245        | -3.522660974 | 0.000722878 | 0.004916225      | -1.508835525 |
| FLII         | 0.090304606     | 7.858651408        | 3.522164343  | 0.000724044 | 0.004921929      | -1.50888977  |
| C9orf16      | 0.278165977     | 5.458669955        | 3.521901872  | 0.00072466  | 0.004923899      | -1.524634053 |
| CCDC191      | -0.352990526    | 0.884994294        | -3.521173098 | 0.000726375 | 0.004933325      | -0.903593346 |
| BUB1B        | -0.448731916    | 1.821387364        | -3.520872327 | 0.000727084 | 0.004935914      | -1.077075142 |
| CASP4        | -0.136678395    | 5.730405493        | -3.519936904 | 0.000729293 | 0.004948678      | -1.543411767 |
| RHEB         | 0.174895815     | 5.002864234        | 3.519702413  | 0.000729847 | 0.004950212      | -1.519903164 |
| TIMM10B      | -0.142141379    | 4.943211744        | -3.519481083 | 0.000730371 | 0.004951536      | -1.519790681 |
| STK36        | -0.266413399    | 3.522254343        | -3.518317515 | 0.000733131 | 0.004964893      | -1.310871507 |
| RUBCNL       | -0.303020873    | 3.343656875        | -3.518270739 | 0.000733243 | 0.004964893      | -1.346988084 |
| PLAGL1       | -0.204009271    | 4.902171002        | -3.518233862 | 0.000733333 | 0.004964893      | -1.507952425 |
| WDR6         | -0.150896047    | 6.794397311        | -3.517209809 | 0.000735768 | 0.004979161      | -1.558595214 |
| LOC105376805 | 0.959589755     | -2.496590708       | 3.516761497  | 0.000736838 | 0.004984162      | -0.549989727 |
| NFS1         | 0.155580947     | 3.313378176        | 3.516563869  | 0.00073731  | 0.004985116      | -1.336836647 |
| POLR2E       | 0.19480662      | 7.122543734        | 3.515949507  | 0.000738779 | 0.004992809      | -1.558540594 |
| DBD1         | 0.187761276     | 8.36451884         | 3.514966205  | 0.000741137 | 0.005006494      | -1.498087355 |
| FBXO3        | -0.226436447    | 4.241299343        | -3.513625675 | 0.000744362 | 0.005026027      | -1.467392262 |
| DENND2C      | -0.419145376    | 2.317854819        | -3.512611416 | 0.000746811 | 0.005040304      | -1.170308669 |
| CREB5        | -0.360928769    | 4.303520357        | -3.512274262 | 0.000747627 | 0.00504355       | -1.481996662 |
| ARIH2OS      | 0.514072473     | -1.049531557       | 3.511327653  | 0.000749921 | 0.005056767      | -0.693536429 |
| CTNBL1       | 0.167412694     | 5.46878929         | 3.50904367   | 0.000755486 | 0.005092011      | -1.568309342 |
| WDR26        | -0.134529235    | 7.247463343        | -3.508536522 | 0.000756727 | 0.005098094      | -1.577969813 |
| PKNOX2       | 1.059611185     | -2.136134217       | 3.508187699  | 0.000757582 | 0.00510157       | -0.598286066 |
| NDUFA11      | 0.263359723     | 3.691374822        | 3.505474989  | 0.000764259 | 0.005144237      | -1.42322792  |
| LOC730101    | 0.325374703     | 2.834763664        | 3.504117804  | 0.000767621 | 0.005163623      | -1.357863337 |



| Gene     | Log fold change | Average Expression | t            | P-value     | Adjusted P-value | B            |
|----------|-----------------|--------------------|--------------|-------------|------------------|--------------|
| WDR82    | -0.168204398    | 7.158953875        | -3.504035623 | 0.000767825 | 0.005163623      | -1.588538533 |
| SP4      | -0.376942314    | 2.365578077        | -3.50382521  | 0.000768348 | 0.005164831      | -1.193478138 |
| STK17A   | -0.2095721      | 5.560302075        | -3.503276207 | 0.000769713 | 0.005171699      | -1.576953611 |
| SPAG5    | -0.365922783    | 2.539868313        | -3.502141241 | 0.000772542 | 0.005188395      | -1.223821955 |
| SMARCD2  | 0.094231765     | 5.813709675        | 3.501040332  | 0.000775296 | 0.005204569      | -1.60521859  |
| VWA8     | -0.197360665    | 4.720390691        | -3.500751925 | 0.000776019 | 0.005207102      | -1.555418826 |
| COPS2    | 0.076858302     | 7.147510258        | 3.500091921  | 0.000777675 | 0.005215896      | -1.604790804 |
| GPR39    | -0.635470596    | -0.865455551       | -3.498618484 | 0.000781386 | 0.005238453      | -0.722894382 |
| RCOR1    | -0.296378719    | 4.6078857          | -3.498471015 | 0.000781759 | 0.005238617      | -1.572034122 |
| LIF      | 0.886796308     | 1.379831199        | 3.497681156  | 0.000783756 | 0.005249665      | -0.861661989 |
| METTL3   | 0.233091042     | 3.394746689        | 3.496842927  | 0.00078588  | 0.005261556      | -1.391315317 |
| GREM1    | -0.284565148    | 10.85685006        | -3.496365233 | 0.000787094 | 0.005267338      | -1.397696117 |
| SSB      | 0.108335664     | 6.178630201        | 3.495705055  | 0.000788773 | 0.005276234      | -1.628473189 |
| YTHDC1   | 0.131904303     | 5.058275286        | 3.493437099  | 0.000794569 | 0.005312646      | -1.588042486 |
| NCL      | 0.114288249     | 9.27532227         | 3.492651106  | 0.000796587 | 0.005321415      | -1.508917095 |
| HMGCR    | -0.524512336    | 6.877863802        | -3.492773359 | 0.000796273 | 0.005321415      | -1.624129129 |
| PYHIN1   | 1.20986352      | -3.438538938       | 3.491997066  | 0.00079827  | 0.005329713      | -0.623372683 |
| HIST1H4I | 0.256514268     | 2.670197063        | 3.491880965  | 0.000798569 | 0.005329713      | -1.32132089  |
| LANCL1   | -0.252917908    | 5.584114155        | -3.491756224 | 0.000798891 | 0.005329713      | -1.625488406 |
| DNAJC17  | 0.222670834     | 2.601543973        | 3.491577873  | 0.000799351 | 0.005330421      | -1.304119756 |
| CRCP     | -0.197265384    | 4.08297045         | -3.490687311 | 0.000801651 | 0.005343392      | -1.537650257 |
| FAM46A   | 0.323675178     | 6.475562028        | 3.489261505  | 0.000805346 | 0.005365649      | -1.646741583 |
| PRKD3    | -0.301276678    | 6.181553863        | -3.489065925 | 0.000805854 | 0.005366661      | -1.648146562 |
| CBARP    | -0.335594693    | 2.767527913        | -3.488360723 | 0.000807689 | 0.005376503      | -1.298843556 |
| TAF4     | -0.182975521    | 3.287278591        | -3.485613088 | 0.000814875 | 0.005421944      | -1.48357124  |
| MINDY1   | 0.172917071     | 3.508709087        | 3.485329409  | 0.000815621 | 0.005424508      | -1.435005983 |
| ATG101   | -0.159438253    | 4.779394231        | -3.483979386 | 0.000819177 | 0.005445754      | -1.598577784 |
| TRIM32   | 0.200987        | 5.178829829        | 3.483470341  | 0.000820522 | 0.005452288      | -1.639977374 |
| UBE2D3   | -0.080065099    | 7.929629293        | -3.481427744 | 0.000825938 | 0.005485862      | -1.635126024 |
| SMARCC2  | -0.119798943    | 6.136754647        | -3.481272081 | 0.000826352 | 0.005486194      | -1.669157078 |
| NIPAL4   | 0.751634247     | -1.642971042       | 3.480423909  | 0.000828613 | 0.005498776      | -0.722058544 |
| APOLD1   | 0.308287006     | 0.544944238        | 3.479822761  | 0.000830218 | 0.005507004      | -1.008328563 |
| ACOX2    | -0.16972498     | 3.686839009        | -3.479601368 | 0.00083081  | 0.005508506      | -1.474557462 |
| LRP12    | -0.252749961    | 5.232634376        | -3.479292209 | 0.000831638 | 0.005511566      | -1.646985443 |
| TMEM116  | -0.175737679    | 2.79379766         | -3.478348139 | 0.000834169 | 0.005525911      | -1.353490908 |
| LPP      | -0.205130221    | 6.662250642        | -3.478159087 | 0.000834677 | 0.005526845      | -1.679240205 |
| PGRMC2   | -0.097188331    | 7.7403914          | -3.476584531 | 0.000838917 | 0.005552483      | -1.651357905 |
| TADA1    | -0.186715783    | 2.468011259        | -3.476099232 | 0.000840229 | 0.005558719      | -1.355955794 |
| PEG13    | -0.566795062    | -0.365634216       | -3.475712466 | 0.000841275 | 0.005563198      | -0.862781599 |
| CDCP1    | -0.407310058    | 2.23311105         | -3.475006867 | 0.000843187 | 0.005570959      | -1.286503565 |
| PIK3CB   | 0.269165708     | 3.44721703         | 3.475006408  | 0.000843188 | 0.005570959      | -1.481245942 |
| ECI2     | 0.173082984     | 5.269412494        | 3.474553213  | 0.000844418 | 0.005576641      | -1.661547699 |
| RPL22L1  | 0.206986167     | 5.707824889        | 3.473160627  | 0.000848209 | 0.005599221      | -1.685724078 |
| ZNF670   | -0.396995269    | 0.787410614        | -3.472693371 | 0.000849485 | 0.005605185      | -1.027259393 |
| PTBP1    | 0.096368711     | 7.729849333        | 3.472313156  | 0.000850524 | 0.005607707      | -1.658488935 |
| CEP170   | -0.356809836    | 5.128582928        | -3.472281178 | 0.000850611 | 0.005607707      | -1.667929564 |
| POLN     | -0.44198384     | 0.082189625        | -3.471905931 | 0.000851638 | 0.005612022      | -0.913700619 |
| TPBG     | -0.280671884    | 6.5836804          | -3.471223328 | 0.00085351  | 0.005621893      | -1.700833469 |
| TPGS1    | 0.345892524     | 3.015329994        | 3.470932624  | 0.000854308 | 0.00562469       | -1.417946623 |
| UFD1     | 0.197717301     | 5.232015103        | 3.46947969   | 0.000858307 | 0.005646085      | -1.678830922 |
| GOLPH3   | -0.196665122    | 6.777177416        | -3.469553444 | 0.000858103 | 0.005646085      | -1.706101899 |
| PHF14    | 0.131642108     | 4.745889535        | 3.469057511  | 0.000859472 | 0.005651284      | -1.646940243 |
| DHX29    | -0.167366876    | 5.718691151        | -3.4688889   | 0.000859938 | 0.00565188       | -1.703358985 |
| CAPN15   | -0.129306161    | 5.105728619        | -3.468414213 | 0.000861251 | 0.005655985      | -1.678882667 |
| TBC1D2B  | -0.36762041     | 6.874553462        | -3.468391542 | 0.000861314 | 0.005655985      | -1.707210928 |
| PTP4A2   | -0.077573175    | 8.142175113        | -3.46659584  | 0.000866297 | 0.005686232      | -1.662714875 |
| COPG1    | 0.101342432     | 7.886035643        | 3.464108195  | 0.000873246 | 0.005729348      | -1.679804997 |
| KIAA1143 | -0.367424864    | 3.840114007        | -3.461600304 | 0.000880305 | 0.005773148      | -1.583392511 |
| ZFAND6   | -0.15013033     | 5.268632775        | -3.46057214  | 0.000883215 | 0.005789708      | -1.710076658 |
| PTPN21   | -0.165999697    | 5.321439332        | -3.459954548 | 0.000884967 | 0.00579867       | -1.717742735 |
| FARSB    | 0.132050918     | 5.478744497        | 3.45947177   | 0.000886339 | 0.005805134      | -1.723568624 |
| HSPA8    | 0.156544048     | 9.938707479        | 3.457708759  | 0.000891366 | 0.005835521      | -1.578431108 |
| PNPLA6   | 0.123436792     | 5.93706266         | 3.456881609  | 0.000893734 | 0.00584848       | -1.739310395 |
| MOGS     | 0.110622964     | 5.307167141        | 3.456405292  | 0.0008951   | 0.005854877      | -1.729686762 |
| RHOA     | 0.083136581     | 9.484159322        | 3.455330096  | 0.000898191 | 0.005872546      | -1.620413952 |
| PHF23    | -0.332080641    | 5.726053083        | -3.455101008 | 0.000898851 | 0.005874311      | -1.747254393 |
| ILF3-AS1 | -0.180509524    | 2.889159939        | -3.45479378  | 0.000899736 | 0.005874327      | -1.465482463 |
| FMR1     | -0.178681084    | 4.346495581        | -3.454720884 | 0.000899947 | 0.005874327      | -1.66602306  |
| GREM2    | -0.226157703    | 7.565617287        | -3.454694448 | 0.000900023 | 0.005874327      | -1.720911622 |
| FKRP     | 0.134223816     | 3.861484264        | 3.454535522  | 0.000900482 | 0.005874775      | -1.607340106 |

| Gene      | Log fold change | Average Expression | t            | P-value     | Adjusted P-value | B            |
|-----------|-----------------|--------------------|--------------|-------------|------------------|--------------|
| ATAD2     | -0.265186838    | 3.683879379        | -3.454140829 | 0.000901622 | 0.005877122      | -1.590262628 |
| MBOAT7    | 0.123211319     | 6.725798185        | 3.454153092  | 0.000901586 | 0.005877122      | -1.752519514 |
| PEX13     | -0.154842549    | 3.853787195        | -3.453725324 | 0.000902823 | 0.005880599      | -1.613467809 |
| XRCC5     | 0.083393927     | 8.302150959        | 3.453686382  | 0.000902936 | 0.005880599      | -1.689310519 |
| UBAP2     | 0.128136265     | 4.824195194        | 3.452495385  | 0.000906389 | 0.005900537      | -1.713125086 |
| ZNF48     | -0.266772197    | 2.688541279        | -3.451160043 | 0.000910275 | 0.005923277      | -1.465807255 |
| RALY      | 0.196847561     | 7.035854062        | 3.450471161  | 0.000912286 | 0.0059338        | -1.75749168  |
| MRE11     | -0.165212135    | 3.678078543        | -3.44995684  | 0.00091379  | 0.005941018      | -1.586540259 |
| ATM       | -0.316296716    | 5.341834456        | -3.449659698 | 0.00091466  | 0.005944109      | -1.751122682 |
| ACADSB    | -0.202372902    | 3.742720628        | -3.44938786  | 0.000915457 | 0.005946721      | -1.622890436 |
| TRAP1     | 0.133515015     | 4.641932455        | 3.44841424   | 0.000918316 | 0.00596272       | -1.701483313 |
| TMEM179B  | 0.179835381     | 4.563691092        | 3.448001359  | 0.000919531 | 0.005968036      | -1.694439142 |
| SLC30A9   | -0.132529255    | 5.681041488        | -3.446717322 | 0.000923319 | 0.00599004       | -1.765113606 |
| DFFB      | -0.314735982    | 0.696547653        | -3.446358575 | 0.00092438  | 0.005994341      | -1.165033232 |
| ZNF800    | -0.299515083    | 4.341723492        | -3.443493965 | 0.000932892 | 0.006046942      | -1.654007766 |
| GPX1      | 0.194115019     | 7.234744238        | 3.443166968  | 0.000933869 | 0.006050667      | -1.774848214 |
| THOC2     | -0.219550281    | 5.051311387        | -3.442939656 | 0.000934548 | 0.006052466      | -1.746213774 |
| PARP4     | -0.204476042    | 5.955243552        | -3.442445665 | 0.000936026 | 0.006059432      | -1.782387376 |
| LINC00665 | -0.185213418    | 2.742644141        | -3.441576396 | 0.000938632 | 0.006073693      | -1.46694696  |
| INPP5D    | 0.591747316     | -1.684886869       | 3.441144345  | 0.00093993  | 0.00607687       | -0.826483363 |
| SF3B2     | 0.117392038     | 8.039582576        | 3.441209905  | 0.000939733 | 0.00607687       | -1.744170301 |
| KIF2C     | -0.341056389    | 2.469385035        | -3.440304681 | 0.000942457 | 0.006090595      | -1.420220874 |
| FOXF2     | -0.181499135    | 3.562790976        | -3.438910123 | 0.000946669 | 0.006113853      | -1.633991355 |
| BET1      | 0.124613017     | 4.377828161        | 3.438844304  | 0.000946868 | 0.006113853      | -1.713393162 |
| WDR61     | 0.123259851     | 4.359525443        | 3.438092877  | 0.000949145 | 0.006125929      | -1.717332998 |
| NUDT19    | -0.167552544    | 3.60586929         | -3.437112357 | 0.000952124 | 0.006141818      | -1.608388908 |
| CCNH      | -0.218106755    | 3.802064041        | -3.437014378 | 0.000952422 | 0.006141818      | -1.651209611 |
| ENAH      | -0.260702512    | 7.499572036        | -3.436291272 | 0.000954625 | 0.006150904      | -1.774117657 |
| RNPEP     | 0.120924772     | 6.150292534        | 3.436283918  | 0.000954648 | 0.006150904      | -1.806555896 |
| KDM4C     | 0.212900116     | 2.243529528        | 3.435928777  | 0.000955732 | 0.006155255      | -1.367413721 |
| IRF7      | 0.229507873     | 3.162413979        | 3.434564957  | 0.000959905 | 0.00617685       | -1.562766962 |
| CKB       | 0.266052655     | 4.754313605        | 3.43465815   | 0.000959619 | 0.00617685       | -1.744506504 |
| UBE2K     | -0.140868638    | 6.017792523        | -3.434246771 | 0.000960881 | 0.006180491      | -1.811362709 |
| VPS33A    | 0.141039295     | 3.488089358        | 3.433614987  | 0.000962822 | 0.006190332      | -1.632340619 |
| FNIP2     | -0.343426873    | 4.606094739        | -3.431289063 | 0.000969999 | 0.006231618      | -1.754878087 |
| SIVA1     | 0.221638884     | 4.768668034        | 3.431265946  | 0.000970071 | 0.006231618      | -1.763398419 |
| ZNF75A    | 0.206990667     | 2.136221349        | 3.430528092  | 0.000972358 | 0.00624099       | -1.412326258 |
| NAF1      | -0.269351245    | 3.040285619        | -3.430654091 | 0.000971967 | 0.00624099       | -1.589802258 |
| LLPH      | -0.113081779    | 3.847898578        | -3.430234199 | 0.000973271 | 0.006244187      | -1.671970647 |
| TRIM2     | -0.30460856     | 5.856099962        | -3.429604356 | 0.000975229 | 0.006253829      | -1.822905381 |
| SLC5A3    | -0.466186538    | 5.671111002        | -3.429483963 | 0.000975604 | 0.006253829      | -1.82556813  |
| UAP1L1    | 0.17480235      | 5.523121159        | 3.429323386  | 0.000976104 | 0.006254373      | -1.812910771 |
| HOOK3     | -0.261430838    | 5.502229192        | -3.42855108  | 0.000978513 | 0.00626714       | -1.820159741 |
| MAP3K1    | -0.419573337    | 1.389539381        | -3.428358951 | 0.000979113 | 0.006268318      | -1.338483052 |
| UQCRC1    | 0.19656138      | 6.651896727        | 3.426758125  | 0.000984126 | 0.006297737      | -1.83611834  |
| C2CD2     | -0.209305626    | 4.662901941        | -3.426282936 | 0.000985619 | 0.006304611      | -1.779000129 |
| IDH3G     | 0.12229172      | 5.597020857        | 3.42567014   | 0.000987547 | 0.006314264      | -1.823240507 |
| TTC28     | -0.318908843    | 6.483897061        | -3.425313493 | 0.000988671 | 0.006318768      | -1.840308135 |
| MRPL38    | 0.394619387     | 0.223703687        | 3.423396883  | 0.000994731 | 0.006354804      | -1.116920965 |
| ERCC6     | -0.333600193    | 3.344735646        | -3.42308049  | 0.000995735 | 0.00635852       | -1.667592693 |
| FAM105A   | 0.492945506     | -1.277034498       | 3.422537534  | 0.00099746  | 0.006366603      | -0.942582013 |
| OSGIN1    | -0.324132883    | 3.356745763        | -3.422416058 | 0.000997846 | 0.006366603      | -1.584336293 |
| USP35     | -0.222484434    | 2.676570771        | -3.421021289 | 0.001002291 | 0.006392258      | -1.572587569 |
| CSNK2B    | 0.196051965     | 4.385565212        | 3.42056302   | 0.001003756 | 0.006395227      | -1.760652931 |
| SLC43A3   | -0.222537469    | 6.168430816        | -3.4204772   | 0.00100403  | 0.006395227      | -1.852213353 |
| EIF2AK2   | -0.271517772    | 6.18714437         | -3.420590089 | 0.001003669 | 0.006395227      | -1.854800983 |
| CLIP4     | -0.170207606    | 5.563345765        | -3.420070645 | 0.001005332 | 0.006400059      | -1.841954431 |
| USP25     | -0.100453215    | 5.541046678        | -3.419974823 | 0.001005639 | 0.006400059      | -1.84195985  |
| WSB1      | -0.339131439    | 4.513856037        | -3.419214294 | 0.001008078 | 0.006410168      | -1.724152713 |
| GRAMD3    | -0.267195593    | 5.098709264        | -3.419272405 | 0.001007892 | 0.006410168      | -1.786474135 |
| SNRPC     | 0.219852074     | 5.36435431         | 3.418790812  | 0.001009439 | 0.006412282      | -1.835483569 |
| AP1S1     | 0.135251888     | 5.670620448        | 3.418699655  | 0.001009732 | 0.006412282      | -1.848801178 |
| SLC39A9   | -0.194439874    | 5.628252051        | -3.418581154 | 0.001010113 | 0.006412282      | -1.849492213 |
| PSMG2     | 0.173367694     | 5.870394288        | 3.418633476  | 0.001009945 | 0.006412282      | -1.854237443 |
| DTNA      | -0.276578528    | 2.508625193        | -3.41779638  | 0.001012641 | 0.006424578      | -1.500221455 |
| C17orf51  | -0.18297679     | 4.181546502        | -3.417715106 | 0.001012903 | 0.006424578      | -1.752080712 |
| TRHGAP21  | -0.185343555    | 6.769833038        | -3.416306694 | 0.001017456 | 0.00645074       | -1.866471005 |
| TMEM60    | -0.169254059    | 4.082389166        | -3.415315453 | 0.001020672 | 0.006461836      | -1.743379791 |
| INTS4     | 0.099736117     | 4.094853121        | 3.415212107  | 0.001021008 | 0.006461836      | -1.758897584 |
| PATL1     | -0.206227389    | 5.966114027        | -3.415263904 | 0.001020839 | 0.006461836      | -1.868403282 |

| Gene     | Log fold change | Average Expression | t            | P-value     | Adjusted P-value | B            |
|----------|-----------------|--------------------|--------------|-------------|------------------|--------------|
| FYCO1    | -0.260117155    | 6.782931126        | -3.41529731  | 0.001020731 | 0.006461836      | -1.868551513 |
| UBE2I    | 0.105487201     | 6.740166105        | 3.415106483  | 0.001021351 | 0.006461836      | -1.869042773 |
| KMT2E    | -0.245488165    | 5.885080405        | -3.413891395 | 0.001025309 | 0.006484152      | -1.871727959 |
| SMYD5    | -0.097725809    | 4.982741525        | -3.413530753 | 0.001026486 | 0.006488873      | -1.828429146 |
| RNPS1    | -0.173667518    | 4.740413378        | -3.413079977 | 0.001027959 | 0.006492801      | -1.820126757 |
| UTP6     | 0.145979099     | 4.942510143        | 3.413076979  | 0.001027969 | 0.006492801      | -1.825564767 |
| PAN3     | -0.255487215    | 4.027113539        | -3.412921145 | 0.001028479 | 0.006493298      | -1.766454918 |
| NUP54    | -0.123896039    | 5.260574437        | -3.411166932 | 0.001034235 | 0.006526902      | -1.861128489 |
| PAWR     | -0.268352241    | 4.382820025        | -3.409812101 | 0.001038701 | 0.006552343      | -1.777319032 |
| PHB      | 0.134100506     | 5.402449973        | 3.407928157  | 0.001044942 | 0.006588951      | -1.871475291 |
| CCDC92   | 0.197895818     | 6.349789467        | 3.407309177  | 0.001047    | 0.006599166      | -1.894055529 |
| PURA     | -0.229088688    | 5.277527283        | -3.4061163   | 0.001050977 | 0.006621463      | -1.873710891 |
| IP6K2    | 0.179946665     | 4.603300081        | 3.404669064  | 0.001055821 | 0.006649203      | -1.81639656  |
| RUBCN    | -0.155697609    | 4.302767589        | -3.404467791 | 0.001056497 | 0.006650676      | -1.805526457 |
| BUD23    | 0.171889713     | 5.295759585        | 3.404160159  | 0.00105753  | 0.006654398      | -1.87779249  |
| TIMELESS | -0.169893363    | 3.812881166        | -3.403900818 | 0.001058401 | 0.006657102      | -1.735165735 |
| GPX8     | -0.108576218    | 7.486409877        | -3.403217256 | 0.001060702 | 0.006668788      | -1.885124778 |
| CAMTA1   | 0.234688722     | 4.178821865        | 3.402812883  | 0.001062065 | 0.00667017       | -1.792882423 |
| TMEM8A   | 0.126121168     | 6.447896332        | 3.402985383  | 0.001061484 | 0.00667017       | -1.90779174  |
| ATP6V1E1 | 0.107581598     | 6.497789158        | 3.402758057  | 0.00106225  | 0.00667017       | -1.908097475 |
| ACBD6    | 0.16315036      | 5.547800913        | 3.401347701  | 0.001067019 | 0.00669732       | -1.89694279  |
| NAGPA    | 0.139333387     | 4.364989811        | 3.400934859  | 0.001068418 | 0.006703312      | -1.819688829 |
| TAF13    | -0.222539481    | 4.724611693        | -3.400043417 | 0.001071446 | 0.006719511      | -1.851375276 |
| SLC25A12 | -0.121340749    | 4.308761142        | -3.399391015 | 0.001073667 | 0.00673064       | -1.824247688 |
| PPDPF    | 0.281890043     | 7.479238945        | 3.397597138  | 0.001079797 | 0.006764404      | -1.905854315 |
| C19orf43 | 0.213054828     | 6.947133289        | 3.397552125  | 0.001079952 | 0.006764404      | -1.919529354 |
| SAR1A    | -0.126057703    | 7.544992381        | -3.397016717 | 0.001081788 | 0.006773089      | -1.895707599 |
| TMEM168  | -0.384716835    | 3.924236005        | -3.395519009 | 0.00108694  | 0.006802519      | -1.800870847 |
| ANGEL1   | -0.229828702    | 3.175233398        | -3.39519384  | 0.001088062 | 0.006806711      | -1.6724904   |
| FAM193B  | -0.285582081    | 3.265370847        | -3.394710269 | 0.001089732 | 0.006814328      | -1.733559029 |
| CLCF1    | -0.282545486    | 3.281300019        | -3.394094232 | 0.001091863 | 0.006824821      | -1.636847889 |
| SGCD     | -0.325000757    | 6.23896983         | -3.393689368 | 0.001093265 | 0.006830754      | -1.932902167 |
| CDK5R1   | -0.362395107    | 0.241563335        | -3.393324573 | 0.001094531 | 0.006832266      | -1.131602433 |
| KLHL11   | -0.734614883    | -0.176994975       | -3.393386399 | 0.001094316 | 0.006832266      | -1.134964285 |
| GAMT     | 0.250531717     | 5.242681732        | 3.393227377  | 0.001094868 | 0.006832266      | -1.900229403 |
| PSD3     | -0.362247654    | 5.835421026        | -3.393006897 | 0.001095634 | 0.006834213      | -1.93085163  |
| TSPOAP1  | -0.306994466    | 2.101370722        | -3.392836937 | 0.001096224 | 0.006835066      | -1.526199881 |
| HMGCS1   | -0.364429178    | 6.92190708         | -3.391770134 | 0.001099938 | 0.006855383      | -1.919844947 |
| HLA-E    | 0.129203636     | 8.63179938         | 3.391455968  | 0.001101034 | 0.006859375      | -1.863660778 |
| DLG2     | -0.501377443    | -0.833382912       | -3.39114826  | 0.001102108 | 0.00686323       | -1.030868139 |
| CDT1     | -0.257441552    | 2.9975587          | -3.390634571 | 0.001103904 | 0.006871572      | -1.671878891 |
| RTL8C    | 0.185338129     | 7.719794511        | 3.389767353  | 0.001106941 | 0.006887635      | -1.917606852 |
| HLCS     | -0.269809162    | 4.911234344        | -3.387395161 | 0.001115291 | 0.006933862      | -1.910204804 |
| GLRX3    | 0.138192491     | 5.493439488        | 3.38743912   | 0.001115136 | 0.006933862      | -1.938187305 |
| SMIM3    | -0.242077975    | 4.841932451        | -3.387217151 | 0.00111592  | 0.006934911      | -1.872871395 |
| CMTM7    | 0.228717524     | 3.297640628        | 3.386331843  | 0.001119053 | 0.006951513      | -1.724262984 |
| TANC1    | 0.377811267     | 3.992294632        | 3.38569339   | 0.001121318 | 0.00696271       | -1.857137651 |
| PNSF3    | 0.110711231     | 5.236781811        | 3.385068091  | 0.00112354  | 0.006973634      | -1.932183073 |
| LDB2     | -0.189053534    | 4.950270054        | -3.383747477 | 0.001128247 | 0.006999963      | -1.894471808 |
| LZIC     | -0.231529862    | 4.578209648        | -3.382129907 | 0.001134037 | 0.007032992      | -1.897575096 |
| KRBOX4   | -0.19484222     | 2.18863759         | -3.381290047 | 0.001137055 | 0.007047133      | -1.557610668 |
| ANKRD26  | 0.227756523     | 3.005540625        | 3.381234939  | 0.001137253 | 0.007047133      | -1.712774574 |
| STRAP    | 0.08168038      | 7.104749927        | 3.380984584  | 0.001138154 | 0.007049817      | -1.960775396 |
| TCFL5    | 0.124981327     | 4.645576654        | 3.379951885  | 0.001141878 | 0.007069977      | -1.905797679 |
| PRKG1    | -0.333022603    | 5.509786375        | -3.37788872  | 0.001149353 | 0.007113332      | -1.968377032 |
| MAGEF1   | -0.168843028    | 4.635653305        | -3.377264095 | 0.001151625 | 0.007124466      | -1.911684125 |
| COG4     | -0.104775095    | 5.895662801        | -3.377133873 | 0.001152099 | 0.007124474      | -1.976987195 |
| KDM1B    | -0.26295911     | 4.602598516        | -3.376559333 | 0.001154193 | 0.00713157       | -1.914116397 |
| PSMA5    | 0.164031884     | 5.885989407        | 3.376600822  | 0.001154042 | 0.00713157       | -1.980262373 |
| MAP1B    | -0.30707686     | 8.598287048        | -3.376328064 | 0.001155037 | 0.00713386       | -1.899928021 |
| DNAJB4   | 0.289230663     | 4.632870545        | 3.375844671  | 0.001156804 | 0.007141839      | -1.911427755 |
| KLHDC2   | -0.099891647    | 4.782172718        | -3.374995243 | 0.001159913 | 0.007158104      | -1.920806829 |
| CCDC93   | -0.257200247    | 5.495104535        | -3.37299392  | 0.001167271 | 0.00720056       | -1.985147265 |
| NUP153   | -0.411128904    | 5.501163225        | -3.372864085 | 0.00116775  | 0.007200565      | -1.980474087 |
| YES1     | -0.203759823    | 6.139752248        | -3.371533164 | 0.001172669 | 0.007227939      | -2.001212266 |
| SOX9     | -0.348385166    | 3.989759656        | -3.369492071 | 0.001180251 | 0.007271697      | -1.880286163 |
| STXBP4   | -0.184685306    | 3.496400562        | -3.368337917 | 0.001184559 | 0.007295253      | -1.813228895 |
| CEP55    | -0.36209571     | 3.020681392        | -3.366496097 | 0.001191464 | 0.00733478       | -1.716264346 |
| CREBL2   | -0.112869055    | 6.55994004         | -3.364580565 | 0.001198685 | 0.007376223      | -2.021840373 |
| BPGM     | 0.234589082     | 3.85672248         | 3.363323063  | 0.001203448 | 0.00740251       | -1.851500996 |

| Gene     | Log fold change | Average Expression | t            | P-value     | Adjusted P-value | B            |
|----------|-----------------|--------------------|--------------|-------------|------------------|--------------|
| CDKN2A   | 0.214151254     | 4.219818169        | 3.362820925  | 0.001205355 | 0.007411214      | -1.914692956 |
| LIMD2    | 0.2104294       | 2.924597232        | 3.362522656  | 0.001206489 | 0.00741516       | -1.784117997 |
| C3orf67  | -0.287918385    | 1.187505077        | -3.3612338   | 0.001211402 | 0.007442314      | -1.383464809 |
| GDNF-AS1 | 0.551228793     | -1.298585879       | 3.359330935  | 0.001218688 | 0.007484028      | -1.087576547 |
| IFRD1    | 0.279554752     | 3.969340128        | 3.358761792  | 0.001220876 | 0.007494406      | -1.928858054 |
| ARFRP1   | 0.182934224     | 4.695713089        | 3.35791224   | 0.001224148 | 0.007511431      | -1.986432575 |
| TRIM52   | -0.231049298    | 1.759386629        | -3.357748948 | 0.001224778 | 0.007511512      | -1.542929345 |
| ROR2     | 0.194173632     | 5.404381789        | 3.357650286  | 0.001225158 | 0.007511512      | -2.011491821 |
| YPEL3    | 0.301951797     | 4.964538293        | 3.35697995   | 0.001227748 | 0.007524327      | -1.965705481 |
| MAD1L1   | 0.194429278     | 5.121614358        | 3.356329542  | 0.001230266 | 0.00753669       | -1.999917069 |
| SLC12A2  | -0.34473257     | 3.981168418        | -3.356004819 | 0.001231524 | 0.007541292      | -1.942173581 |
| RBM39    | -0.151627276    | 6.380794647        | -3.355877541 | 0.001232018 | 0.007541292      | -2.04586433  |
| ALDH6A1  | -0.158970856    | 4.180486699        | -3.355590002 | 0.001233134 | 0.007545057      | -1.934372888 |
| SOX11    | -0.473381716    | 1.7816466          | -3.355350007 | 0.001234066 | 0.007545576      | -1.551054126 |
| SP1      | -0.236950195    | 6.322856822        | -3.355310284 | 0.001234221 | 0.007545576      | -2.048979392 |
| WTAPP1   | -1.022529109    | -2.915476463       | -3.355022903 | 0.001235338 | 0.007549343      | -0.993614094 |
| IQCA1    | -0.772169631    | -1.501544269       | -3.354248833 | 0.001238352 | 0.007563582      | -1.067624382 |
| CUX1     | 0.110914362     | 6.76880595         | 3.354166747  | 0.001238672 | 0.007563582      | -2.049957631 |
| TPM4     | 0.122592447     | 9.91754617         | 3.353774715  | 0.001240202 | 0.007569854      | -1.89179503  |
| SLC52A2  | 0.177188478     | 5.347903905        | 3.351518314  | 0.00124904  | 0.007620713      | -2.036965012 |
| THEMIS2  | 0.241334494     | 2.038766014        | 3.351090247  | 0.001250724 | 0.007627895      | -1.679431454 |
| ZNF480   | 0.171873532     | 3.823526492        | 3.349738418  | 0.001256054 | 0.007654229      | -1.913171576 |
| SKP1     | 0.078657705     | 6.624664829        | 3.349737436  | 0.001256058 | 0.007654229      | -2.064279602 |
| NKAP     | 0.12178319      | 4.315082287        | 3.348731787  | 0.001260037 | 0.007675372      | -1.964737503 |
| AGPS     | -0.228862512    | 5.356386162        | -3.348368683 | 0.001261476 | 0.007681036      | -2.04679188  |
| C19orf48 | 0.132570378     | 4.472322093        | 3.348014272  | 0.001262883 | 0.007683389      | -1.987112526 |
| GID8     | -0.090398477    | 5.96613208         | -3.348025541 | 0.001262838 | 0.007683389      | -2.068374434 |
| FAM210A  | -0.21145131     | 3.82461132         | -3.347062181 | 0.001266669 | 0.007697098      | -1.927130437 |
| FBXL20   | 0.2318561       | 4.065768714        | 3.347089728  | 0.001266656 | 0.007697098      | -1.963355662 |
| CTDSPL2  | -0.265247842    | 4.396635241        | -3.34713004  | 0.001266399 | 0.007697098      | -1.982937873 |
| TRIB1    | 0.302313967     | 3.62736882         | 3.34654358   | 0.001268736 | 0.00770612       | -1.795045066 |
| DDX49    | 0.207583964     | 5.597052107        | 3.346433034  | 0.001269177 | 0.00770612       | -2.061534767 |
| MADD     | 0.165028974     | 4.961093935        | 3.346020102  | 0.001270826 | 0.007709914      | -2.049660748 |
| TMEM109  | 0.105502871     | 7.171075708        | 3.346054317  | 0.001270689 | 0.007709914      | -2.06558736  |
| RNF19A   | -0.240878212    | 4.845406702        | -3.34331689  | 0.001281667 | 0.00772558       | -2.022300702 |
| PRPS2    | 0.132739044     | 4.194869802        | 3.34311784   | 0.001282469 | 0.007774291      | -1.985694802 |
| CYBA     | 0.282066521     | 5.725885512        | 3.342829014  | 0.001283633 | 0.007778218      | -2.0701252   |
| RGMB     | -0.193959804    | 5.708384809        | -3.341729337 | 0.001288075 | 0.007801994      | -2.062447392 |
| ZBED6    | -0.645077231    | 1.422917967        | -3.341390903 | 0.001289445 | 0.007807152      | -1.607355525 |
| NOD1     | -0.257259186    | 2.621129408        | -3.341213534 | 0.001290163 | 0.007808364      | -1.735908909 |
| SYNJ2    | -0.244691931    | 6.831374369        | -3.340743028 | 0.001292071 | 0.007816769      | -2.076073376 |
| KIF2A    | -0.343390823    | 4.767270152        | -3.340458255 | 0.001293227 | 0.007820622      | -2.052326358 |
| ZYX      | -0.170317759    | 9.079186863        | -3.339527477 | 0.001297012 | 0.007840363      | -1.997446461 |
| TFB2M    | -0.161909572    | 3.598560964        | -3.339320102 | 0.001297856 | 0.007842322      | -1.898309763 |
| FLJ37453 | 0.399173286     | -0.010569217       | 3.337643404  | 0.001304705 | 0.007877386      | -1.275491198 |
| PPTC7    | -0.285785649    | 4.078242439        | -3.337741282 | 0.001304304 | 0.007877386      | -1.969411666 |
| LCTL     | -0.98083853     | -3.015420429       | -3.337407998 | 0.001305669 | 0.007877548      | -1.04240971  |
| MFSD14B  | 0.145232744     | 5.44906755         | 3.337381527  | 0.001305778 | 0.007877548      | -2.08831329  |
| EGFR     | -0.394064108    | 7.382863654        | -3.336741917 | 0.001308401 | 0.007884532      | -2.083970403 |
| TMED3    | 0.12577607      | 6.956073881        | 3.336716526  | 0.001308506 | 0.007884532      | -2.098079748 |
| YTHDF3   | -0.349905886    | 6.652844491        | -3.336918597 | 0.001307676 | 0.007884532      | -2.102097104 |
| PPP3CC   | -0.135315458    | 3.681963541        | -3.336148603 | 0.00131084  | 0.007895436      | -1.936970222 |
| COG1     | 0.102443656     | 4.727977434        | 3.335549738  | 0.001313305 | 0.007907123      | -2.052260002 |
| SASH1    | -0.211812788    | 7.215031413        | -3.334735742 | 0.001316663 | 0.007924173      | -2.097615044 |
| ENO3     | 0.444007325     | -0.272695792       | 3.332431507  | 0.001326212 | 0.007968908      | -1.283327402 |
| CNOT7    | -0.104582128    | 5.565986102        | -3.332663972 | 0.001325245 | 0.007968908      | -2.10103112  |
| LRPAP1   | 0.157329408     | 7.088343923        | 3.332776799  | 0.001324777 | 0.007968908      | -2.105894521 |
| EGLN1    | -0.131294285    | 5.631939821        | -3.332432747 | 0.001326206 | 0.007968908      | -2.106121644 |
| ZDHHC17  | -0.288042624    | 4.007282439        | -3.331821797 | 0.001328749 | 0.007980972      | -1.984867473 |
| ELAC2    | 0.102200191     | 5.660476503        | 3.331536118  | 0.00132994  | 0.007984939      | -2.108590383 |
| TMED8    | -0.228729727    | 3.937111071        | -3.331337756 | 0.001330767 | 0.007986723      | -2.003865798 |
| ISG15    | 0.31178056      | 4.371719869        | 3.330432204  | 0.00133455  | 0.008006235      | -2.018345698 |
| SMARCA4  | 0.090735463     | 6.6391332          | 3.329289196  | 0.001339339 | 0.008031767      | -2.122879937 |
| NANP     | -0.302781928    | 3.714574901        | -3.328555175 | 0.001342423 | 0.008047057      | -1.947961998 |
| MARCH6   | -0.203708461    | 6.220274583        | -3.327949287 | 0.001344973 | 0.00805914       | -2.129519452 |
| RPS6KC1  | 0.163982202     | 5.088635713        | 3.325921763  | 0.001353542 | 0.008107259      | -2.092858252 |
| CNTF     | -0.694230874    | -1.055368535       | -3.323960538 | 0.001361879 | 0.008153954      | -1.214415024 |
| ZNRF2    | -0.212629777    | 2.612814509        | -3.323477898 | 0.001363938 | 0.008163038      | -1.806192011 |
| MNS1     | -0.226054643    | 1.938689119        | -3.322446587 | 0.001368348 | 0.008186177      | -1.65986177  |
| CDC73    | -0.342767844    | 4.958329254        | -3.322277344 | 0.001369073 | 0.008187263      | -2.099255962 |

| Gene         | Log fold change | Average Expression | t            | P-value     | Adjusted P-value | B            |
|--------------|-----------------|--------------------|--------------|-------------|------------------|--------------|
| FOSB         | 1.507026038     | 2.399014547        | 3.321917344  | 0.001370616 | 0.008192559      | -1.636136063 |
| HIRA         | 0.175179497     | 3.756112912        | 3.321690357  | 0.00137159  | 0.008192559      | -1.998145108 |
| SAMD4B       | -0.191344062    | 7.688249713        | -3.321748458 | 0.001371341 | 0.008192559      | -2.123964543 |
| TFCP2        | -0.098392125    | 4.721485911        | -3.320924096 | 0.001374882 | 0.008208969      | -2.091416175 |
| IWS1         | -0.132158442    | 5.201351274        | -3.320714133 | 0.001375786 | 0.008211109      | -2.122453617 |
| ABHD12       | 0.139883896     | 5.505211564        | 3.319661045  | 0.001380326 | 0.008234941      | -2.136260837 |
| ZDHHC21      | -0.328741465    | 2.652438697        | -3.318551295 | 0.001385125 | 0.008255198      | -1.825735766 |
| MID1         | -0.256787951    | 4.930445542        | -3.318621019 | 0.001384823 | 0.008255198      | -2.099673627 |
| SEMA3D       | -0.403027341    | 5.455746279        | -3.318495858 | 0.001385365 | 0.008255198      | -2.143186569 |
| BCAP29       | -0.103698215    | 6.008662888        | -3.318301043 | 0.001386209 | 0.008256963      | -2.156285742 |
| STXBP5       | -0.196929885    | 5.450903045        | -3.317451317 | 0.001389897 | 0.008275658      | -2.13918744  |
| G2E3         | -0.249668102    | 3.053312085        | -3.317079445 | 0.001391514 | 0.008282012      | -1.960042939 |
| NDUFA2       | 0.244213329     | 4.064340098        | 3.315356263  | 0.00139903  | 0.008323456      | -2.030893138 |
| SMPD1        | 0.098684888     | 7.033026243        | 3.314351735  | 0.001403429 | 0.00834633       | -2.160451486 |
| RARA         | -0.197189122    | 5.573033032        | -3.313183907 | 0.001408559 | 0.008373535      | -2.156194368 |
| PLEKHA2      | -0.316624751    | 2.4352914          | -3.31217459  | 0.001413007 | 0.008396664      | -1.830810903 |
| TNIP3        | -0.37775738     | 0.495451394        | -3.311274594 | 0.001416985 | 0.008415833      | -1.444730193 |
| ARFGAP2      | 0.101758693     | 5.902517873        | 3.311191979  | 0.001417351 | 0.008415833      | -2.173574876 |
| SLC16A13     | 0.317869675     | 1.181073801        | 3.310972457  | 0.001418323 | 0.008418287      | -1.674903838 |
| NFKBIB       | 0.195822269     | 3.790992763        | 3.310262371  | 0.001421471 | 0.008433651      | -2.026922146 |
| PKP4         | -0.145086392    | 4.927577169        | -3.309329994 | 0.001425615 | 0.008454907      | -2.150222246 |
| CRAT         | 0.112866731     | 6.594063384        | 3.308470064  | 0.001429447 | 0.008474298      | -2.186297724 |
| DGKE         | -0.318602773    | 1.454982901        | -3.307263237 | 0.001434841 | 0.008502931      | -1.613254824 |
| SPRED3       | -0.311555777    | 1.571119905        | -3.3068935   | 0.001436498 | 0.008509399      | -1.661554013 |
| PLPPR3       | 0.533688998     | -0.846802169       | 3.306518339  | 0.00143818  | 0.008510549      | -1.277796865 |
| STK38L       | -0.268262975    | 4.421934173        | -3.306472371 | 0.001438387 | 0.008510549      | -2.111472878 |
| CPSF6        | -0.088768184    | 5.621213729        | -3.306714614 | 0.0014373   | 0.008510549      | -2.178038118 |
| THAP9        | 0.332350075     | 1.029203905        | 3.305519543  | 0.001442669 | 0.00852584       | -1.542333798 |
| TMEM242      | 0.149856661     | 4.269956896        | 3.305658642  | 0.001442043 | 0.00852584       | -2.082643203 |
| SERP1        | 0.078711114     | 7.426713943        | 3.305529467  | 0.001442624 | 0.00852584       | -2.171739648 |
| NFKBIA       | 0.252068295     | 4.74152153         | 3.304679595  | 0.001446454 | 0.008544856      | -2.116128533 |
| SIAH1        | 0.192393452     | 3.072333779        | 3.303200322  | 0.001453143 | 0.008581004      | -1.916745116 |
| INAFM1       | 0.270250971     | 3.124986361        | 3.302918554  | 0.00145442  | 0.008585181      | -1.919987425 |
| KLF5         | -0.487864355    | 2.982587523        | -3.302465537 | 0.001456476 | 0.008593949      | -1.773532038 |
| BBS9         | -0.124535213    | 4.337634408        | -3.30166753  | 0.001460104 | 0.008611983      | -2.109588686 |
| IVNS1ABP     | -0.222674986    | 5.704951212        | -3.300920036 | 0.00146351  | 0.008628694      | -2.204285724 |
| CDC27        | -0.210550693    | 6.296168113        | -3.300200201 | 0.001466797 | 0.008644692      | -2.210811815 |
| LINC01354    | -0.532929281    | -0.633528642       | -3.299728629 | 0.001468954 | 0.008654019      | -1.265059134 |
| LPGAT1       | -0.215374784    | 5.554739039        | -3.2985579   | 0.001474323 | 0.008682251      | -2.203204317 |
| SPCS1        | 0.126785501     | 6.100871713        | 3.298132417  | 0.001476278 | 0.00869037       | -2.214655716 |
| GALK1        | 0.232906433     | 4.584795212        | 3.297380262  | 0.001479741 | 0.008707353      | -2.128974849 |
| PPM1G        | 0.109816061     | 6.566790143        | 3.296040687  | 0.001485928 | 0.008740343      | -2.222444306 |
| FAM213B      | 0.198687682     | 3.939278398        | 3.295348941  | 0.001489132 | 0.008755771      | -2.088368367 |
| LOC100287808 | -0.601968411    | -1.90826703        | -3.294399117 | 0.001493542 | 0.008776026      | -1.223238125 |
| JKAMP        | -0.208076992    | 4.33498359         | -3.294230896 | 0.001494325 | 0.008776026      | -2.123796615 |
| PANX1        | -0.326891804    | 5.283134911        | -3.294337078 | 0.001493831 | 0.008776026      | -2.19653837  |
| RCN3         | 0.23591008      | 8.381167218        | 3.292834509  | 0.001500834 | 0.008810818      | -2.17044567  |
| TPD52L2      | 0.07836335      | 7.60221458         | 3.292686685  | 0.001501524 | 0.008811438      | -2.203426544 |
| GABPB2       | -0.170948576    | 3.036022441        | -3.2924053   | 0.00150284  | 0.008812479      | -1.959665128 |
| ATP5C1       | 0.175350108     | 6.435426618        | 3.29239848   | 0.001502872 | 0.008812479      | -2.233493178 |
| PTPN1        | -0.207788438    | 4.853898859        | -3.289903125 | 0.001514585 | 0.008877706      | -2.174594415 |
| FLCN         | -0.231490607    | 4.585723238        | -3.288929245 | 0.001519179 | 0.008901174      | -2.165363257 |
| RAB3IP       | -0.306748559    | 1.351970477        | -3.288478639 | 0.00152131  | 0.00891019       | -1.701698986 |
| NOP2         | -0.204064322    | 5.140181867        | -3.28805979  | 0.001523292 | 0.00891487       | -2.217072633 |
| PCNX4        | -0.225890546    | 5.491922628        | -3.288081514 | 0.001523189 | 0.00891487       | -2.22751328  |
| UBA6         | -0.271863464    | 4.535133199        | -3.287479257 | 0.001526044 | 0.008927508      | -2.162115919 |
| RBM15        | -0.225422019    | 2.428941939        | -3.287019839 | 0.001528226 | 0.008933329      | -1.834464358 |
| TUT1         | 0.185066447     | 2.333310399        | 3.287053304  | 0.001528067 | 0.008933329      | -1.941721748 |
| PAK1         | 0.119482375     | 5.015145655        | 3.286030647  | 0.001532932 | 0.008957365      | -2.204852319 |
| ATRX         | -0.310706302    | 5.942271456        | -3.284993685 | 0.00153788  | 0.008982795      | -2.249916803 |
| SHQ1         | 0.118491334     | 4.708591681        | 3.284292544  | 0.001541234 | 0.008998898      | -2.200377766 |
| NAXD         | 0.115005624     | 4.455908544        | 3.282609434  | 0.001549314 | 0.00904257       | -2.184127887 |
| PTGER1       | 0.773282085     | -1.624887598       | 3.282241742  | 0.001551085 | 0.009049397      | -1.252649225 |
| TONSL        | 0.20507939      | 2.922356872        | 3.281950596  | 0.001552488 | 0.009054077      | -1.96815202  |
| SYNE2        | -0.292425728    | 4.109769046        | -3.281679372 | 0.001553796 | 0.009054696      | -2.150113675 |
| ABCF2        | 0.095195455     | 6.431963292        | 3.281777359  | 0.001553324 | 0.009054696      | -2.264099439 |
| AKT1         | 0.097467608     | 6.986128542        | 3.279879541  | 0.001562504 | 0.009101921      | -2.263474373 |
| OAZ1         | 0.148018526     | 8.347866992        | 3.27866068   | 0.001568428 | 0.009132892      | -2.210350765 |
| PPP1R12B     | -0.361005102    | 1.452352365        | -3.278163412 | 0.00157085  | 0.009143464      | -1.742048176 |
| ZNF35        | -0.21640566     | 3.183629839        | -3.277089566 | 0.001576094 | 0.009166901      | -2.023255281 |

| Gene         | Log fold change | Average Expression | t            | P-value     | Adjusted P-value | B            |
|--------------|-----------------|--------------------|--------------|-------------|------------------|--------------|
| BRD4         | -0.113339448    | 6.503785662        | -3.277152176 | 0.001575787 | 0.009166901      | -2.277630631 |
| SAP18        | 0.18221582      | 6.706825719        | 3.275702992  | 0.001582888 | 0.009202867      | -2.280464201 |
| KIF18B       | -0.556087332    | 0.347449908        | -3.275348331 | 0.001584631 | 0.009205891      | -1.532133919 |
| ZNF142       | -0.178717181    | 4.11726683         | -3.275382785 | 0.001584461 | 0.009205891      | -2.190550597 |
| BOLA1        | 0.362912939     | 2.538348106        | 3.275092928  | 0.001585887 | 0.009208124      | -1.922068956 |
| SOBP         | 0.232983506     | 3.895379749        | 3.275021575  | 0.001586238 | 0.009208124      | -2.163245581 |
| HLA-F        | 0.302375189     | 1.781237634        | 3.274612841  | 0.00158825  | 0.009216254      | -1.798413792 |
| ZNF607       | -0.301791392    | 1.684454597        | -3.273978056 | 0.00159138  | 0.009220208      | -1.934554634 |
| MMP11        | 0.237794717     | 2.851016764        | 3.274338887  | 0.0015896   | 0.009220208      | -2.02854039  |
| SNAP47       | 0.097160423     | 4.86463363         | 3.273984247  | 0.001591349 | 0.009220208      | -2.22885507  |
| RAB3GAP2     | -0.265271623    | 5.247134924        | -3.274191857 | 0.001590325 | 0.009220208      | -2.272652397 |
| TAGLN2       | 0.144308794     | 7.782506885        | 3.271879695  | 0.001601767 | 0.009276821      | -2.258542161 |
| C12orf60     | 0.571550972     | -1.300787833       | 3.271612172  | 0.001603095 | 0.009280949      | -1.356023766 |
| SSNA1        | 0.209614912     | 4.979460725        | 3.271035319  | 0.001605964 | 0.009293621      | -2.242193036 |
| CDC123       | 0.110864122     | 5.550977284        | 3.27092409   | 0.001606518 | 0.009293621      | -2.28352015  |
| C12orf76     | 0.238370739     | 1.560369708        | 3.27028414   | 0.001609707 | 0.009308496      | -1.811061692 |
| NR1H2        | 0.15730949      | 6.305181585        | 3.26982499   | 0.001611999 | 0.009318172      | -2.297952823 |
| HYKK         | 0.458584474     | 0.054518706        | 3.268868351  | 0.001616784 | 0.009342248      | -1.49725248  |
| AP1G1        | -0.318098616    | 6.279043912        | -3.268053107 | 0.001620873 | 0.00936228       | -2.303756036 |
| PPA2         | 0.116263233     | 4.914961425        | 3.267837635  | 0.001621955 | 0.00936494       | -2.256949418 |
| CISD1        | -0.111716754    | 4.576402071        | -3.267421933 | 0.001624045 | 0.009373413      | -2.224671509 |
| RAPGEF6      | 0.25755027      | 3.240990295        | 3.265100955  | 0.001635759 | 0.009433793      | -2.056361374 |
| NUCB1        | 0.115414787     | 9.170904291        | 3.265120222  | 0.001635661 | 0.009433793      | -2.204587194 |
| SRSF10       | -0.111990225    | 5.639692449        | -3.264927572 | 0.001636637 | 0.009435246      | -2.300176206 |
| INPP5B       | -0.264551959    | 2.727513312        | -3.264396004 | 0.001639332 | 0.009447169      | -2.013075746 |
| STX17        | -0.31649568     | 3.255622926        | -3.263408145 | 0.001644352 | 0.009472474      | -2.091029252 |
| SHISA4       | 0.204428501     | 4.929634603        | 3.262788104  | 0.00164751  | 0.00948704       | -2.264456133 |
| NBPF9        | -0.319381701    | 2.145838879        | -3.262567972 | 0.001648633 | 0.009489877      | -1.937640152 |
| RNF166       | 0.166293097     | 3.007809659        | 3.260624748  | 0.001658574 | 0.009543454      | -2.048445257 |
| XYLB         | -0.261496465    | 2.349570372        | -3.260322624 | 0.001660125 | 0.009548729      | -1.931300465 |
| ARCN1        | -0.170926281    | 7.929784895        | -3.259588522 | 0.001663898 | 0.00956313       | -2.283115697 |
| P3H3         | 0.164682929     | 6.921177317        | 3.259662458  | 0.001663518 | 0.00956313       | -2.32337921  |
| POU3F2       | 0.887726972     | -3.389150479       | 3.259434889  | 0.001664689 | 0.009564026      | -1.270808429 |
| ANP32B       | 0.200350836     | 7.417519784        | 3.258958031  | 0.001667146 | 0.009574488      | -2.311946659 |
| DLG3         | -0.147158432    | 3.055496867        | -3.258290378 | 0.001670591 | 0.009590617      | -2.020716709 |
| ZBTB33       | -0.281904514    | 4.571290088        | -3.258009459 | 0.001672042 | 0.009594144      | -2.270849766 |
| ALKBH7       | 0.234239575     | 5.343379925        | 3.257925016  | 0.001672479 | 0.009594144      | -2.303554894 |
| FAM8A1       | -0.124880393    | 5.909476391        | -3.256943442 | 0.001677562 | 0.009619637      | -2.331011579 |
| CLPB         | 0.173216053     | 3.010024354        | 3.256301883  | 0.001680891 | 0.009631399      | -2.071390187 |
| RANBP2       | -0.225265949    | 6.253890805        | -3.256402821 | 0.001680367 | 0.009631399      | -2.337437518 |
| ERI1         | -0.203829015    | 4.645240352        | -3.256070492 | 0.001682094 | 0.009634624      | -2.27405198  |
| ZC3H10       | -0.167693694    | 2.723872693        | -3.255753545 | 0.001683742 | 0.0096404        | -2.052441895 |
| UTP23        | -0.246958582    | 4.260827769        | -3.255352308 | 0.001685831 | 0.009648693      | -2.234742712 |
| LGALS8       | -0.139650271    | 5.641767096        | -3.255089605 | 0.0016872   | 0.009652861      | -2.32906248  |
| SACS         | -0.362188       | 5.982548921        | -3.254853721 | 0.00168843  | 0.009656232      | -2.337251413 |
| OTULIN       | -0.222148591    | 4.273871708        | -3.254403358 | 0.001690781 | 0.009666008      | -2.257451086 |
| LYRM2        | -0.112762522    | 4.909786658        | -3.253194776 | 0.001697106 | 0.009698482      | -2.297086735 |
| B4GALT7      | 0.112530642     | 4.303827351        | 3.252880321  | 0.001698755 | 0.009704225      | -2.250107772 |
| ZNF205       | 0.199239616     | 3.017005368        | 3.252294703  | 0.00170183  | 0.009718107      | -2.110437898 |
| TNRC18       | 0.163201025     | 7.251181503        | 3.251446901  | 0.001706291 | 0.00973989       | -2.336875706 |
| RCAN3        | 0.246833467     | 2.455784435        | 3.251063372  | 0.001708313 | 0.009747737      | -2.017564772 |
| SORBS1       | -0.419934093    | 0.756990613        | -3.250590059 | 0.001710811 | 0.009758296      | -1.70295917  |
| FADS1        | 0.296292354     | 8.619203198        | 3.249291847  | 0.001717681 | 0.009793771      | -2.263827085 |
| GADD45GIP1   | 0.265123145     | 5.573462503        | 3.248027667  | 0.001724395 | 0.009824617      | -2.342979186 |
| SLU7         | 0.086916925     | 5.71957031         | 3.248131089  | 0.001723845 | 0.009824617      | -2.354435087 |
| TRIM33       | -0.33241974     | 4.628776701        | -3.246912237 | 0.00173034  | 0.00985476       | -2.313615096 |
| ZNF148       | -0.275727519    | 5.665327483        | -3.246580192 | 0.001732113 | 0.009861131      | -2.355198985 |
| LAS1L        | 0.133045169     | 4.721972991        | 3.2460275    | 0.001735069 | 0.00987008       | -2.306227537 |
| FARP2        | -0.247106908    | 5.006668063        | -3.246047286 | 0.001734963 | 0.00987008       | -2.342409744 |
| USP11        | 0.126071198     | 6.414960399        | 3.245918805  | 0.001735651 | 0.00987008       | -2.368001326 |
| LDHB         | 0.096784875     | 8.585442998        | 3.245654841  | 0.001737064 | 0.009874391      | -2.29294276  |
| HNRNPL       | 0.155025597     | 5.90159304         | 3.245158397  | 0.001739726 | 0.009885791      | -2.366814616 |
| SF3B6        | 0.149081158     | 5.530833331        | 3.24479004   | 0.001741703 | 0.009893295      | -2.355622427 |
| ARID5A       | -0.27894996     | 4.627939506        | -3.244409717 | 0.001743747 | 0.009898996      | -2.262051057 |
| USP5         | 0.086356315     | 6.585597176        | 3.244358751  | 0.001744021 | 0.009898996      | -2.372050732 |
| DLAT         | -0.154826571    | 5.01060562         | -3.24359628  | 0.001748126 | 0.009918558      | -2.337223215 |
| GS2          | -0.459480931    | -0.238502388       | -3.24296564  | 0.001751528 | 0.009934119      | -1.565127665 |
| PRIM2        | -0.201039274    | 3.02221562         | -3.24283044  | 0.001752258 | 0.00993452       | -2.131183919 |
| LOC100128398 | -0.299979519    | 0.421174705        | -3.241569431 | 0.001759082 | 0.009955973      | -1.67252348  |
| DDX19A       | 0.144530066     | 4.007142971        | 3.241820494  | 0.001757722 | 0.009955973      | -2.255473684 |

| Gene     | Log fold change | Average Expression | t            | P-value     | Adjusted P-value | B            |
|----------|-----------------|--------------------|--------------|-------------|------------------|--------------|
| TUBG1    | 0.20590769      | 4.518485872        | 3.241729045  | 0.001758217 | 0.009955973      | -2.300794873 |
| TSPAN17  | 0.103942684     | 5.426908594        | 3.241777053  | 0.001757957 | 0.009955973      | -2.359033734 |
| ARFGAP1  | 0.10955132      | 6.182555375        | 3.241520623  | 0.001759347 | 0.009955973      | -2.380063023 |
| NDUFAF6  | 0.202268005     | 2.746050043        | 3.241227283  | 0.001760938 | 0.009961235      | -2.076317157 |
| TLL12    | 0.114317433     | 5.556258207        | 3.240945214  | 0.001762469 | 0.009966155      | -2.370310873 |
| P3H4     | 0.11470248      | 5.381786404        | 3.240740896  | 0.001763579 | 0.009968689      | -2.35979918  |
| ZSWIM6   | -0.291386277    | 3.109707887        | -3.240402678 | 0.001765418 | 0.00997534       | -2.081315979 |
| S100A3   | 0.255671955     | 2.274424054        | 3.239538237  | 0.001770126 | 0.009998192      | -1.995079438 |
| BANP     | 0.195945058     | 2.642754272        | 3.238730664  | 0.001774535 | 0.010019339      | -2.077031331 |
| ZBED3    | -0.160483171    | 3.919199864        | -3.237545437 | 0.001781024 | 0.010052211      | -2.238704693 |
| FBXL17   | -0.268129255    | 4.457325546        | -3.236657053 | 0.001785903 | 0.010075972      | -2.312077579 |
| ELFN1    | 0.273863485     | 4.971541276        | 3.236427314  | 0.001787167 | 0.010079326      | -2.369912463 |
| FMNL1    | 0.208805468     | 3.488331792        | 3.236063841  | 0.001789168 | 0.010086835      | -2.183264798 |
| SLC2A5   | 0.415160328     | 0.034489333        | 3.235890264  | 0.001790124 | 0.010088037      | -1.599310407 |
| FAM76A   | -0.229785167    | 3.280498601        | -3.235782099 | 0.00179072  | 0.010088037      | -2.184180334 |
| LHPP     | 0.213841984     | 4.550876163        | 3.235594     | 0.001791757 | 0.010090106      | -2.313187279 |
| EXOG     | -0.193613751    | 2.739761964        | -3.235417075 | 0.001792734 | 0.01009183       | -2.136011809 |
| WDPCP    | -0.236518729    | 1.907418537        | -3.234592607 | 0.001797289 | 0.010112781      | -1.937490024 |
| TRPC1    | -0.364770955    | 2.518830723        | -3.234500573 | 0.001797798 | 0.010112781      | -2.055016483 |
| MMS19    | 0.116337743     | 5.77489551         | 3.233960063  | 0.001800791 | 0.010125835      | -2.39312344  |
| ZNF654   | 0.214823641     | 3.798547372        | 3.233621245  | 0.001802669 | 0.010128836      | -2.267180812 |
| RPS2     | 0.186954023     | 8.401425943        | 3.233670037  | 0.001802399 | 0.010128836      | -2.341133207 |
| SAP30    | 0.175530574     | 3.256961574        | 3.233495921  | 0.001803365 | 0.010128965      | -2.185936806 |
| SEMA6D   | -0.396780798    | 1.263120866        | -3.233018654 | 0.001806015 | 0.01014007       | -1.946763438 |
| PTPRJ    | -0.29749468     | 2.584967151        | -3.231979577 | 0.001811797 | 0.010164959      | -2.134579295 |
| SEPT9    | 0.13735942      | 9.223786112        | 3.232026768  | 0.001811534 | 0.010164959      | -2.288887913 |
| INO80    | -0.14402674     | 4.829969558        | -3.231855413 | 0.001812489 | 0.010165056      | -2.348637241 |
| C14orf93 | 0.173948711     | 3.410705644        | 3.231671174  | 0.001813517 | 0.010167033      | -2.184895341 |
| MEMO1    | -0.317007533    | 0.403416321        | -3.23064594  | 0.001819244 | 0.010191557      | -1.680959835 |
| GLTP     | 0.136843982     | 5.391452649        | 3.230709992  | 0.001818886 | 0.010191557      | -2.39059696  |
| ZNF544   | -0.107031081    | 3.804442695        | -3.229639048 | 0.001824886 | 0.010215564      | -2.254170994 |
| EIF4G3   | -0.167066099    | 6.761451485        | -3.229688226 | 0.00182461  | 0.010215564      | -2.411082917 |
| PJA2     | -0.343543166    | 7.30220264         | -3.229312979 | 0.001826716 | 0.010218393      | -2.396282096 |
| FEZ1     | 0.151049125     | 6.226853836        | 3.229307357  | 0.001826748 | 0.010218393      | -2.414806368 |
| C19orf60 | 0.286193785     | 4.922959572        | 3.228699525  | 0.001830165 | 0.010233706      | -2.358469546 |
| ATG9A    | 0.103125361     | 6.66005752         | 3.227540644  | 0.001836696 | 0.010266414      | -2.41963328  |
| PTPDC1   | 0.26138184      | 1.85219879         | 3.227169115  | 0.001838794 | 0.010274332      | -1.943334998 |
| GDI2     | 0.078156795     | 8.421068241        | 3.226490825  | 0.001842631 | 0.010291953      | -2.354543865 |
| SMAD4    | -0.192380336    | 5.799683149        | -3.225799062 | 0.001846552 | 0.010310029      | -2.422282802 |
| ZBTB39   | -0.238514824    | 2.511749274        | -3.225372856 | 0.001848971 | 0.010319713      | -2.093374478 |
| MIR137HG | -0.33010202     | 0.657027117        | -3.225210271 | 0.001849895 | 0.010321045      | -1.737604964 |
| NRF1     | -0.185899767    | 3.43451821         | -3.223960457 | 0.001857011 | 0.010353076      | -2.22358859  |
| C10orf76 | -0.122111507    | 4.828947064        | -3.223979457 | 0.001856902 | 0.010353076      | -2.364821997 |
| CINP     | 0.179454921     | 4.983188361        | 3.223594185  | 0.001859101 | 0.010359507      | -2.383227208 |
| RYBP     | -0.183974971    | 6.500205438        | -3.223517353 | 0.00185954  | 0.010359507      | -2.431927775 |
| NDUFA6   | 0.219331697     | 5.295120697        | 3.222814726  | 0.001863556 | 0.010378045      | -2.405933987 |
| IFRD2    | 0.114217815     | 4.966377614        | 3.222325613  | 0.001866357 | 0.010389802      | -2.399348021 |
| TBC1D32  | -0.376764203    | 1.194892349        | -3.222088736 | 0.001867715 | 0.01039352       | -1.863298066 |
| NDUFB6   | 0.155761603     | 4.50234064         | 3.221762269  | 0.001869588 | 0.010400101      | -2.356492914 |
| TNFSF9   | 0.341464412     | 2.0157642          | 3.219853907  | 0.001880572 | 0.010449623      | -1.946861183 |
| SYVN1    | 0.130136193     | 5.355591006        | 3.219877496  | 0.001880435 | 0.010449623      | -2.423187913 |
| SBDS     | 0.121164704     | 6.427652966        | 3.22003019   | 0.001879554 | 0.010449623      | -2.441731087 |
| PPP6R3   | -0.24366099     | 4.896616384        | -3.219675296 | 0.001881603 | 0.010451498      | -2.382703957 |
| ACSL6    | -0.895682843    | -3.049335262       | -3.219034559 | 0.001885306 | 0.010468207      | -1.364575744 |
| RTN4     | 0.075357215     | 9.225115347        | 3.218316428  | 0.001889464 | 0.010485689      | -2.326987712 |
| ARL5A    | -0.166168924    | 5.386405143        | -3.218250536 | 0.001889846 | 0.010485689      | -2.426011238 |
| ACOT4    | 0.427689083     | -0.011242697       | 3.217949692  | 0.001891591 | 0.010491507      | -1.643198252 |
| SAT1     | 0.161766261     | 4.677453332        | 3.216285391  | 0.001901272 | 0.01054132       | -2.397595102 |
| RNASEH2B | 0.16330064      | 4.670835922        | 3.215428265  | 0.001906276 | 0.010564356      | -2.367813464 |
| GUK1     | 0.218817819     | 7.351078157        | 3.215333571  | 0.00190683  | 0.010564356      | -2.439951074 |
| PGM3     | -0.135998048    | 5.90699653         | -3.215067345 | 0.001908387 | 0.010569096      | -2.454881416 |
| LIPT2    | 0.5982637       | -1.50355919        | 3.213505827  | 0.001917544 | 0.010612008      | -1.487051415 |
| TXLNG    | -0.274933547    | 3.856445561        | -3.213522854 | 0.001917444 | 0.010612008      | -2.33974559  |
| NDUFS8   | 0.228910907     | 5.666703128        | 3.211903289  | 0.001926985 | 0.010660337      | -2.449993408 |
| TMEM151A | 0.70278225      | -1.57718837        | 3.211415742  | 0.001929865 | 0.010664908      | -1.502534187 |
| ZNF486   | -0.285782514    | 2.252566564        | -3.211404002 | 0.001929935 | 0.010664908      | -2.117394233 |
| SLC35E4  | -0.191371172    | 4.071682153        | -3.211456345 | 0.001929625 | 0.010664908      | -2.35600249  |
| SYN1     | 0.356064857     | 0.138262675        | 3.21121953   | 0.001931026 | 0.010667024      | -1.699445144 |
| JRK      | -0.226373278    | 3.203215135        | -3.210674184 | 0.001934255 | 0.010677825      | -2.283430727 |
| ASB6     | -0.130363522    | 4.515718642        | -3.21064988  | 0.001934399 | 0.010677825      | -2.388500512 |

| Gene       | Log fold change | Average Expression | t            | P-value     | Adjusted P-value | B            |
|------------|-----------------|--------------------|--------------|-------------|------------------|--------------|
| DOHH       | 0.233020555     | 3.96072976         | 3.210372413  | 0.001936044 | 0.01068299       | -2.322262541 |
| ANXA5      | 0.131834156     | 10.57060671        | 3.210220043  | 0.001936947 | 0.010684063      | -2.272360221 |
| CLPX       | -0.140106866    | 4.782252345        | -3.208588189 | 0.001946652 | 0.010733663      | -2.435025395 |
| STPG1      | 0.355699163     | 2.089099174        | 3.208393232  | 0.001947815 | 0.010736143      | -1.997755077 |
| OSCP1      | 0.19595559      | 2.228371254        | 3.207251083  | 0.001954638 | 0.010769811      | -2.073825239 |
| GTF2IP4    | -0.265508338    | 1.699027323        | -3.206542652 | 0.001958881 | 0.010789246      | -1.968869513 |
| FBXO27     | 0.258296655     | 2.394584571        | 3.206042084  | 0.001961885 | 0.010795532      | -2.099578049 |
| MCM8       | -0.24553058     | 2.49420224         | -3.205991096 | 0.001962191 | 0.010795532      | -2.112190693 |
| TMEM14B    | 0.190810014     | 4.263474655        | 3.205874862  | 0.001962889 | 0.010795532      | -2.377609913 |
| AZI2       | -0.12296934     | 5.371624755        | -3.206227031 | 0.001960775 | 0.010795532      | -2.45551195  |
| LOC401472  | -0.480525251    | -0.165907443       | -3.205464685 | 0.001965355 | 0.010801205      | -1.610733505 |
| SCAF1      | 0.128359008     | 6.637841298        | 3.20557248   | 0.001964706 | 0.010801205      | -2.482431686 |
| FAM86JP    | -0.335523884    | 1.290472063        | -3.204675894 | 0.001970104 | 0.010823359      | -1.860129756 |
| PSMB6      | 0.172436264     | 5.998649493        | 3.204206482  | 0.001972936 | 0.010834964      | -2.483337986 |
| C1QL3      | -0.791367629    | -1.287858462       | -3.203555954 | 0.001976866 | 0.010852592      | -1.51126489  |
| SIPA1L2    | -0.338447166    | 5.484342471        | -3.203068012 | 0.001979819 | 0.010864844      | -2.468425759 |
| CLK1       | 0.435806117     | 3.847084894        | 3.202690615  | 0.001982106 | 0.010873432      | -2.260512716 |
| MDM1       | 0.230381676     | 1.43194903         | 3.20248251   | 0.001983368 | 0.010875598      | -1.959789562 |
| SLC7A6     | -0.372097902    | 2.77974605         | -3.202387431 | 0.001983945 | 0.010875598      | -2.220902049 |
| GCH1       | -0.367099513    | 2.292021016        | -3.201942745 | 0.001986645 | 0.010886437      | -2.060729915 |
| OTUB1      | 0.167941735     | 5.768646269        | 3.201805685  | 0.001987478 | 0.010887041      | -2.48436823  |
| PIMREG     | -0.373037873    | 1.60180412         | -3.201127529 | 0.001991603 | 0.010905675      | -1.941279818 |
| SYT7       | 0.270885534     | 4.948455907        | 3.200767422  | 0.001993797 | 0.010911657      | -2.465868643 |
| COASY      | 0.155895815     | 5.563466061        | 3.200710485  | 0.001994144 | 0.010911657      | -2.477935761 |
| AASDHPPT   | -0.092881406    | 4.728699671        | -3.200564533 | 0.001995034 | 0.010912563      | -2.442853196 |
| KLHL23     | -0.398540882    | 0.203078344        | -3.20025744  | 0.001996908 | 0.010918849      | -1.690671512 |
| COPE       | 0.23242772      | 6.04951871         | 3.19978223   | 0.001999811 | 0.01092679       | -2.495977006 |
| BIN1       | 0.188218484     | 6.406271293        | 3.19989092   | 0.001999147 | 0.01092679       | -2.498851424 |
| CHID1      | 0.112213562     | 7.126021486        | 3.199507371  | 0.002001492 | 0.010932009      | -2.491087775 |
| BCL7A      | -0.233470791    | 3.164140339        | -3.199280621 | 0.00200288  | 0.010935624      | -2.262290044 |
| ZNF580     | 0.241164387     | 4.463951641        | 3.199121885  | 0.002003852 | 0.010936967      | -2.407114907 |
| CAVIN3     | 0.27668182      | 6.514018258        | 3.198905468  | 0.002005178 | 0.010940239      | -2.502261954 |
| MYO19      | 0.158432058     | 3.369166551        | 3.198188585  | 0.002009576 | 0.010956916      | -2.286145387 |
| BAIAP2-AS1 | -0.114165656    | 4.947990367        | -3.198170128 | 0.002009689 | 0.010956916      | -2.456776202 |
| CDHR2      | -0.893428229    | -2.402177259       | -3.197838283 | 0.002011728 | 0.010964064      | -2.439959225 |
| FAM126A    | -0.295626263    | 7.093404924        | -3.196864595 | 0.002017722 | 0.010992754      | -2.486076068 |
| SMTNL2     | 0.998102685     | -3.144419689       | 3.196489637  | 0.002020035 | 0.011000223      | -1.435064508 |
| COX5B      | 0.220164695     | 6.17577685         | 3.196405568  | 0.002020553 | 0.011000223      | -2.507369976 |
| GPAA1      | 0.141364303     | 7.312346962        | 3.195831254  | 0.002024101 | 0.011015557      | -2.49641511  |
| BAALC      | 0.246806504     | 5.724483045        | 3.194980378  | 0.002029368 | 0.011040233      | -2.503835381 |
| FAF1       | -0.085160434    | 5.314342223        | -3.194418785 | 0.002032852 | 0.01105519       | -2.487647881 |
| PPP1R16A   | 0.206140849     | 3.403161881        | 3.194122024  | 0.002034695 | 0.011059847      | -2.297137191 |
| KMT2A      | -0.351497783    | 5.290177431        | -3.194044511 | 0.002035176 | 0.011059847      | -2.50308308  |
| TXNL1      | 0.150409734     | 6.626479765        | 3.193696612  | 0.002037339 | 0.011067608      | -2.516547955 |
| ZNF575     | 0.300571622     | 2.097849521        | 3.191924445  | 0.002048391 | 0.01111824       | -2.088719126 |
| C5orf22    | -0.163212224    | 3.976601455        | -3.191892299 | 0.002048592 | 0.01111824       | -2.397695041 |
| POMP       | 0.152576221     | 6.432507223        | 3.191847206  | 0.002048874 | 0.01111824       | -2.522495219 |
| RPN1       | 0.070149251     | 8.3724184          | 3.19155226   | 0.002050719 | 0.011124245      | -2.454916238 |
| DENND1A    | -0.137447713    | 5.088579226        | -3.191159607 | 0.002053178 | 0.011133574      | -2.473176715 |
| DARS2      | -0.15141506     | 3.836197016        | -3.190959583 | 0.002054431 | 0.011136363      | -2.369810817 |
| C19orf66   | 0.190336666     | 4.227801013        | 3.190293776  | 0.002058609 | 0.011154997      | -2.415796784 |
| TRAIIP     | 0.327188692     | 0.651484825        | 3.190140399  | 0.002059573 | 0.011156205      | -1.79542561  |
| ZNF836     | -0.399516863    | 1.598460955        | -3.189440914 | 0.002063973 | 0.01117602       | -2.089138234 |
| ZNF528     | -0.187838766    | 3.318102633        | -3.189295274 | 0.00206489  | 0.011176969      | -2.325261322 |
| RBPJ       | -0.296675586    | 7.293550585        | -3.188777539 | 0.002068154 | 0.011189308      | -2.515977831 |
| PAPSS1     | 0.07364312      | 5.943627365        | 3.188698025  | 0.002068655 | 0.011189308      | -2.527855431 |
| ERCC5      | 0.181913575     | 3.884994273        | 3.187479893  | 0.002076355 | 0.011219284      | -2.394844957 |
| PGK1       | 0.083889954     | 7.475342806        | 3.187467784  | 0.002076432 | 0.011219284      | -2.507529565 |
| MED13L     | -0.277410497    | 6.535222446        | -3.187645484 | 0.002075307 | 0.011219284      | -2.533936482 |
| VPS41      | -0.234154225    | 5.90592355         | -3.186906152 | 0.002079991 | 0.011234485      | -2.532999394 |
| HILPDA     | -0.208636599    | 2.29563701         | -3.186421238 | 0.002083068 | 0.011247075      | -2.194841481 |
| PIP4K2C    | -0.214536983    | 3.26336162         | -3.18542078  | 0.002089431 | 0.011277388      | -2.2704633   |
| ZNF630     | 0.284376597     | 0.455592206        | 3.185158167  | 0.002091104 | 0.011278337      | -1.788828698 |
| NUBP2      | 0.209212681     | 5.031238048        | 3.185245234  | 0.002090549 | 0.011278337      | -2.490827198 |
| CACNB3     | 0.126554789     | 4.381478004        | 3.184741708  | 0.00209376  | 0.01128862       | -2.437405126 |
| CHAC1      | 1.170720815     | 1.1046177          | 3.184165032  | 0.002097443 | 0.011303717      | -1.805946696 |
| RBM15B     | -0.089177081    | 6.951067596        | -3.184068388 | 0.002098061 | 0.011303717      | -2.541962336 |
| NPHP3      | -0.267249266    | 1.806840297        | -3.18387574  | 0.002099293 | 0.011306311      | -2.023041518 |
| DRAXIN     | 0.606823327     | -1.241007853       | 3.183713975  | 0.002100328 | 0.01130732       | -1.603116215 |
| BSG        | 0.163495294     | 9.626928199        | 3.183413347  | 0.002102253 | 0.01130732       | -2.410924274 |



| Gene     | Log fold change | Average Expression | t            | P-value     | Adjusted P-value | B            |
|----------|-----------------|--------------------|--------------|-------------|------------------|--------------|
| LNPk     | -0.149210652    | 5.462098598        | -3.183377469 | 0.002102483 | 0.01130732       | -2.529327389 |
| PDZD8    | -0.304700816    | 5.78751405         | -3.18351659  | 0.002101592 | 0.01130732       | -2.539282486 |
| SUZ12    | -0.215468887    | 4.567375886        | -3.182785681 | 0.002106277 | 0.011319643      | -2.487253276 |
| CAMSAP1  | -0.216749328    | 4.681779917        | -3.1828511   | 0.002105857 | 0.011319643      | -2.498288737 |
| S100A10  | 0.23863876      | 9.180016004        | 3.181760365  | 0.002112866 | 0.011349323      | -2.44516026  |
| C11orf95 | -0.139584573    | 5.616224786        | -3.181691941 | 0.002113307 | 0.011349323      | -2.530872085 |
| OCEL1    | 0.200557587     | 3.555348854        | 3.180061923  | 0.002123824 | 0.011401739      | -2.346458125 |
| ANLN     | -0.362828198    | 4.326788436        | -3.179503579 | 0.002127437 | 0.01141707       | -2.463607149 |
| HSPBAP1  | 0.168785683     | 2.512935066        | 3.179104933  | 0.002130021 | 0.011426864      | -2.218117811 |
| UQCRC2   | 0.082139544     | 6.751268197        | 3.178912953  | 0.002131266 | 0.011429474      | -2.556369606 |
| FAM168B  | -0.138210961    | 7.31236823         | -3.178574369 | 0.002133464 | 0.011437189      | -2.541811131 |
| KLHL8    | -0.220524659    | 3.87931323         | -3.177146891 | 0.002142754 | 0.011482902      | -2.424167961 |
| MYBL1    | -0.380521603    | 0.815617791        | -3.176343693 | 0.002147997 | 0.011506909      | -1.899249381 |
| NCR3LG1  | -0.69793113     | 2.966133948        | -3.176089907 | 0.002149656 | 0.011509707      | -2.336042842 |
| BAZ2A    | -0.303286713    | 5.273616158        | -3.176030091 | 0.002150048 | 0.011509707      | -2.557155644 |
| TSPYL2   | 0.161012769     | 4.562315945        | 3.175866188  | 0.002151112 | 0.011511358      | -2.517173945 |
| TRAK1    | -0.139055991    | 6.431975182        | -3.174172071 | 0.002162234 | 0.011566724      | -2.572745142 |
| RIPOR1   | -0.124000485    | 6.619388177        | -3.17386263  | 0.00216427  | 0.011573505      | -2.571255691 |
| MRPL3    | 0.126173287     | 6.303274979        | 3.173302333  | 0.002167961 | 0.011589128      | -2.575243537 |
| SLF2     | -0.277889453    | 4.12250508         | -3.171998406 | 0.002176573 | 0.011629426      | -2.519244986 |
| NOL8     | 0.128245667     | 5.280525483        | 3.171927327  | 0.002177043 | 0.011629426      | -2.558336956 |
| UNC13B   | -0.160525544    | 5.282724054        | -3.171752526 | 0.002178201 | 0.011631483      | -2.550361008 |
| ZNF225   | -0.19868014     | 2.83235177         | -3.1715189   | 0.002179748 | 0.011635622      | -2.330312299 |
| DNAJC2   | -0.147952608    | 4.647989673        | -3.171393182 | 0.002180581 | 0.011635946      | -2.527556931 |
| RHOJ     | -0.220986815    | 4.361867655        | -3.170640779 | 0.002185574 | 0.011658457      | -2.477218388 |
| SELENOM  | 0.224367623     | 6.698519317        | 3.170461979  | 0.002186762 | 0.011660665      | -2.581638724 |
| CENPC    | 0.18975269      | 3.020053265        | 3.170227887  | 0.002188318 | 0.011664835      | -2.271335181 |
| DDIAS    | -0.398931907    | 0.583187237        | -3.169925386 | 0.002190331 | 0.011671433      | -1.861600918 |
| METTL26  | 0.272674433     | 5.289208604        | 3.168207889  | 0.00220179  | 0.011728349      | -2.554714288 |
| GPATCH2L | -0.267404705    | 4.51010023         | -3.167649392 | 0.002205529 | 0.011742691      | -2.520975164 |
| C1orf21  | -0.121481667    | 6.319564399        | -3.167572829 | 0.002206042 | 0.011742691      | -2.590679098 |
| MOAP1    | -0.165341055    | 3.319403167        | -3.167121032 | 0.002209071 | 0.011754662      | -2.343861171 |
| LEMD2    | 0.112817182     | 4.858318767        | 3.166807208  | 0.002211178 | 0.011761716      | -2.532452046 |
| TET1     | -0.438871507    | 0.74698406         | -3.166100764 | 0.002215926 | 0.011782815      | -1.975717167 |
| TRIM21   | 0.138160771     | 4.536462591        | 3.165551144  | 0.002219628 | 0.011794169      | -2.519384507 |
| TMEM14C  | 0.158497175     | 6.680791705        | 3.165656067  | 0.002218921 | 0.011794169      | -2.595599595 |
| HJURP    | -0.38820695     | 1.620401551        | -3.164814186 | 0.002224599 | 0.011812636      | -2.066515782 |
| THRB     | -0.260515868    | 5.865648118        | -3.164803516 | 0.002224671 | 0.011812636      | -2.58269426  |
| GHR      | -0.385442683    | 3.152473356        | -3.164225925 | 0.002228575 | 0.011829196      | -2.331717206 |
| CTIF     | -0.143636998    | 6.615018612        | -3.163502501 | 0.002233474 | 0.011851022      | -2.60155591  |
| R3HCC1L  | 0.20211377      | 2.601201292        | 3.163230706  | 0.002235317 | 0.011856626      | -2.335772463 |
| ZNF610   | 0.252956567     | 1.317509166        | 3.160986073  | 0.002250593 | 0.011929544      | -2.166519836 |
| CCNB2    | -0.253018482    | 2.922017162        | -3.160977946 | 0.002250648 | 0.011929544      | -2.293845505 |
| FMNL2    | -0.320721697    | 4.528023301        | -3.160794852 | 0.002251898 | 0.011931973      | -2.490541192 |
| GTF2B    | 0.137578587     | 4.085202935        | 3.16045154   | 0.002254245 | 0.011940205      | -2.491343015 |
| CYLD     | -0.172808714    | 5.128623436        | -3.159673063 | 0.002259573 | 0.011964222      | -2.576737171 |
| CTSW     | 0.897803123     | -3.058447497       | 3.159409219  | 0.002261382 | 0.011966291      | -1.520743911 |
| PSME4    | -0.27967469     | 5.892497415        | -3.159384321 | 0.002261553 | 0.011966291      | -2.612697756 |
| UBE3A    | -0.2223523      | 5.998880218        | -3.157924853 | 0.002271583 | 0.01201514       | -2.614196379 |
| GSTO1    | 0.178963262     | 6.92707266         | 3.157297737  | 0.002275905 | 0.012033778      | -2.614722485 |
| SELENOF  | 0.078695007     | 7.369374199        | 3.155602941  | 0.002287625 | 0.012091503      | -2.604942554 |
| NDUFS6   | 0.237072477     | 5.24526055         | 3.154732398  | 0.002293667 | 0.012119186      | -2.592913676 |
| USP47    | -0.118965605    | 6.004015725        | -3.154345376 | 0.002296358 | 0.01212915       | -2.62561924  |
| RIN2     | -0.211104756    | 5.501865384        | -3.153750262 | 0.002300501 | 0.012146776      | -2.596080516 |
| N4BP2    | -0.49958832     | 3.052686401        | -3.153273077 | 0.002303829 | 0.01215615       | -2.397975412 |
| RABL2B   | -0.121838279    | 3.25235256         | -3.153264222 | 0.002303891 | 0.01215615       | -2.403923317 |
| GEN1     | -0.256423517    | 2.182790133        | -3.152867034 | 0.002306664 | 0.012164557      | -2.236593608 |
| STOM     | 0.147048425     | 8.150947027        | 3.152695514  | 0.002307862 | 0.012164557      | -2.569490548 |
| HSPBP1   | 0.193391717     | 5.067467851        | 3.152689153  | 0.002307907 | 0.012164557      | -2.589943842 |
| NCOA3    | -0.38364197     | 5.69715857         | -3.151980489 | 0.002312865 | 0.012186426      | -2.623855136 |
| C22orf46 | 0.138345625     | 4.417773195        | 3.15182691   | 0.00231394  | 0.012187831      | -2.540127112 |
| ARHGAP26 | -0.249280219    | 4.06296594         | -3.1505648   | 0.002322799 | 0.012230214      | -2.534245768 |
| B3GNT2   | -0.284072704    | 3.423324051        | -3.149686821 | 0.00232898  | 0.012258475      | -2.412418133 |
| MAFF     | -0.270506954    | 4.856315638        | -3.148942519 | 0.002334232 | 0.012281827      | -2.482128156 |
| RASGRF1  | 0.994229455     | -4.096777116       | 3.148149951  | 0.002339837 | 0.012307018      | -1.524665146 |
| RPL30    | 0.129225514     | 8.579175406        | 3.147326369  | 0.002345674 | 0.012333415      | -2.574936062 |
| FLJ20021 | 0.295732352     | 1.914310567        | 3.146588544  | 0.002350915 | 0.012356659      | -2.148819223 |
| CDC14A   | -0.392744277    | 0.478102799        | -3.145918146 | 0.002355687 | 0.01237742       | -1.961772088 |
| TXNDC17  | 0.190768935     | 4.457739163        | 3.145375969  | 0.002359552 | 0.012391948      | -2.564570137 |
| RBL2     | -0.184222173    | 5.512103415        | -3.145299652 | 0.002360097 | 0.012391948      | -2.638896109 |

| Gene         | Log fold change | Average Expression | t            | P-value     | Adjusted P-value | B            |
|--------------|-----------------|--------------------|--------------|-------------|------------------|--------------|
| POLR2H       | 0.182125703     | 4.241819917        | 3.144377157  | 0.002366689 | 0.012415921      | -2.546072789 |
| ARL10        | -0.305756712    | 3.942580402        | -3.144534698 | 0.002365562 | 0.012415921      | -2.554565884 |
| TBK1         | 0.132962198     | 4.594493836        | 3.144314799  | 0.002367135 | 0.012415921      | -2.581809323 |
| GSTP1        | 0.218876802     | 7.931409587        | 3.143524037  | 0.002372801 | 0.012436976      | -2.621100058 |
| SGSH         | 0.091019725     | 6.229337668        | 3.143570322  | 0.002372469 | 0.012436976      | -2.658250109 |
| ERAL1        | 0.156856959     | 5.06824702         | 3.142263508  | 0.002381858 | 0.012478781      | -2.614270427 |
| MINK1        | -0.092706175    | 6.329890778        | -3.142183596 | 0.002382433 | 0.012478781      | -2.66143434  |
| TMEM106B     | -0.178689746    | 5.896182786        | -3.14191925  | 0.002384337 | 0.012484413      | -2.659356665 |
| SAP130       | -0.100328249    | 5.391350741        | -3.141636423 | 0.002386376 | 0.012490746      | -2.645976645 |
| ZNF565       | -0.24191207     | 1.625272464        | -3.141352859 | 0.002388421 | 0.01249711       | -2.129024941 |
| ATP2A2       | -0.326185851    | 8.258141099        | -3.141106258 | 0.002390202 | 0.012502083      | -2.601658917 |
| LENG8        | -0.266372129    | 4.98386071         | -3.140831041 | 0.00239219  | 0.012508139      | -2.622060612 |
| DDR1         | 0.16833067      | 3.785765114        | 3.140318274  | 0.002395899 | 0.012521962      | -2.54536168  |
| GNAI2        | 0.134431842     | 8.617416378        | 3.140235738  | 0.002396496 | 0.012521962      | -2.592732561 |
| UBE2O        | -0.170924045    | 4.723938882        | -3.138390152 | 0.002409892 | 0.01258759       | -2.634423856 |
| YIF1B        | 0.170499519     | 5.006845043        | 3.138198292  | 0.002411288 | 0.012590519      | -2.626672818 |
| RFWD2        | 0.085858407     | 4.866840801        | 3.137642159  | 0.002415341 | 0.012607309      | -2.61958205  |
| KIF5B        | -0.296082117    | 7.16655869         | -3.137521159 | 0.002416223 | 0.012607547      | -2.664138293 |
| CEBPZ        | -0.125278724    | 5.291372375        | -3.135797997 | 0.002428824 | 0.012668909      | -2.657446083 |
| ATP13A1      | 0.106024123     | 6.022900255        | 3.135010223  | 0.002434605 | 0.012694668      | -2.680211638 |
| HMMR         | -0.384590158    | 1.780702259        | -3.133916468 | 0.002442653 | 0.012732225      | -2.162579561 |
| ZNF581       | 0.156446638     | 5.266048167        | 3.133369314  | 0.002446689 | 0.012748848      | -2.656404965 |
| C12orf10     | 0.209610905     | 5.139809727        | 3.1325633    | 0.002452644 | 0.012775462      | -2.647364822 |
| RAB3IL1      | -0.207465743    | 6.353346769        | -3.131778364 | 0.002458458 | 0.012801315      | -2.691136182 |
| GLI3         | -0.256953961    | 6.411526831        | -3.131076543 | 0.002463666 | 0.012824002      | -2.693602223 |
| CTNNAL1      | 0.15827875      | 5.554344358        | 3.130921701  | 0.002464816 | 0.012825559      | -2.689995154 |
| TCEANC2      | 0.188674729     | 2.99316318         | 3.129397032  | 0.002476172 | 0.012879952      | -2.476518207 |
| AHSA1        | 0.161989957     | 5.946491666        | 3.12928881   | 0.00247698  | 0.012879952      | -2.693807778 |
| RAP1GAP2     | 0.531675447     | -0.862009846       | 3.129076423  | 0.002478566 | 0.012883752      | -1.846611779 |
| FAAP24       | 0.224508455     | 1.996682434        | 3.128658223  | 0.002481692 | 0.012887485      | -2.275632798 |
| RRN3         | -0.214577273    | 4.325944307        | -3.128637016 | 0.00248185  | 0.012887485      | -2.611864397 |
| ANKRD52      | -0.31899028     | 5.587835376        | -3.128802712 | 0.002480611 | 0.012887485      | -2.697043425 |
| LOC100507557 | -0.25403819     | 1.30602404         | -3.128144268 | 0.002485538 | 0.012897744      | -2.030890161 |
| ATXN1L       | -0.247397525    | 5.081723134        | -3.12824634  | 0.002484774 | 0.012897744      | -2.666836411 |
| SPATC1L      | 0.338088904     | 3.805722138        | 3.126090248  | 0.002500968 | 0.012973339      | -2.52388176  |
| NR1H3        | 0.176172625     | 3.758234859        | 3.125771737  | 0.002503368 | 0.012979096      | -2.532730653 |
| PPIG         | -0.097691211    | 5.660416213        | -3.125714396 | 0.002503801 | 0.012979096      | -2.697676958 |
| ACADVL       | 0.140878545     | 6.708484023        | 3.124929695  | 0.002509725 | 0.01300533       | -2.709394677 |
| CSE1L        | 0.10003905      | 6.408178055        | 3.12408782   | 0.002516095 | 0.013033858      | -2.713552177 |
| KCNC4        | 0.144359068     | 3.064614465        | 3.123119019  | 0.002523445 | 0.013067436      | -2.482531649 |
| ITGB8        | -0.3528761      | 3.16492782         | -3.122822833 | 0.002525696 | 0.013074598      | -2.438940531 |
| APPL1        | -0.231524948    | 5.622160531        | -3.122613095 | 0.002527291 | 0.013078361      | -2.71004658  |
| BAK1         | 0.20622951      | 3.210743888        | 3.122448748  | 0.002528541 | 0.013080339      | -2.527054753 |
| ZNF274       | 0.235405464     | 2.771523423        | 3.121771337  | 0.002533702 | 0.013098543      | -2.378101706 |
| MED4         | 0.136082339     | 4.554677816        | 3.121758543  | 0.002533799 | 0.013098543      | -2.650104336 |
| EMILIN1      | 0.120567447     | 9.232627965        | 3.120822969  | 0.002540943 | 0.013130967      | -2.605832246 |
| ZMYM4        | -0.159740359    | 6.024854998        | -3.120658253 | 0.002542203 | 0.013132971      | -2.722461533 |
| VKORC1L1     | -0.279257684    | 5.640139591        | -3.120208825 | 0.002545643 | 0.013146233      | -2.71901708  |
| HMOX1        | -0.344285778    | 9.028612763        | -3.119214283 | 0.00255327  | 0.013181105      | -2.595195002 |
| LONRF3       | -0.738983783    | -2.262736016       | -3.118377545 | 0.002559704 | 0.013209793      | -1.703377318 |
| NUDT8        | 0.277734737     | 2.168279954        | 3.117349677  | 0.002567628 | 0.013246149      | -2.298576991 |
| UTP18        | -0.121477042    | 5.13029844         | -3.117181741 | 0.002568925 | 0.013248302      | -2.704203998 |
| ZMYND19      | -0.190877957    | 4.16589729         | -3.116589494 | 0.002573504 | 0.013266677      | -2.616349882 |
| LUZP1        | -0.412978263    | 6.533055689        | -3.116493091 | 0.00257425  | 0.013266677      | -2.734111551 |
| AURKA        | -0.309571625    | 2.123851608        | -3.115591869 | 0.002581233 | 0.013298117      | -2.294734701 |
| ZNF85        | -0.240708287    | 1.375207717        | -3.115152482 | 0.002584644 | 0.013300193      | -2.193283251 |
| UPF3B        | 0.307639266     | 1.860720918        | 3.115117014  | 0.00258492  | 0.013300193      | -2.267947748 |
| POP4         | 0.154567288     | 4.77662865         | 3.115085112  | 0.002585168 | 0.013300193      | -2.678736962 |
| SORBS3       | 0.212198741     | 7.625547937        | 3.115269744  | 0.002583733 | 0.013300193      | -2.716658393 |
| DTD1         | 0.153275675     | 5.010243314        | 3.114969418  | 0.002586067 | 0.013300276      | -2.695811093 |
| PPM1E        | -0.764451165    | -2.028168137       | -3.114541194 | 0.002589397 | 0.013312858      | -1.686751675 |
| UBASH3B      | -0.292381178    | 3.413826286        | -3.1120797   | 0.002608617 | 0.013407099      | -2.587687539 |
| BRCA2        | -0.31303597     | 1.225138569        | -3.111859011 | 0.002610347 | 0.013411414      | -2.222487887 |
| DGKZ         | 0.154233817     | 4.649499284        | 3.111519411  | 0.002613011 | 0.013420522      | -2.679462196 |
| FAM131C      | 0.546627176     | -1.122613527       | 3.111289651  | 0.002614814 | 0.01342188       | -1.82671839  |
| MDFIC        | -0.144643779    | 6.585123917        | -3.111258754 | 0.002615057 | 0.01342188       | -2.748617492 |
| DYNC2LI1     | -0.209068116    | 3.59506619         | -3.111121394 | 0.002616136 | 0.013422844      | -2.534763315 |
| FIGN         | -0.311015578    | 1.373045486        | -3.110615114 | 0.002620116 | 0.013438689      | -2.236085776 |
| PRICKLE2     | 0.178647255     | 4.488938029        | 3.110184091  | 0.002623509 | 0.013451512      | -2.669609283 |
| ADNP2        | -0.256865562    | 4.364535424        | -3.109881558 | 0.002625893 | 0.013459155      | -2.619366749 |

| Gene         | Log fold change | Average Expression | t            | P-value     | Adjusted P-value | B            |
|--------------|-----------------|--------------------|--------------|-------------|------------------|--------------|
| AARS         | -0.100508881    | 8.052486475        | -3.109692619 | 0.002627383 | 0.013462211      | -2.714155707 |
| EBP          | 0.262456525     | 4.45335743         | 3.109524844  | 0.002628707 | 0.013464414      | -2.675875941 |
| SNRPG        | 0.217980626     | 3.387187411        | 3.107948388  | 0.002641175 | 0.013523678      | -2.546692223 |
| AP4M1        | 0.140747747     | 4.05444503         | 3.107231493  | 0.002646863 | 0.013527152      | -2.627705136 |
| CFL1         | 0.201756912     | 9.260252618        | 3.107316565  | 0.002646188 | 0.013527152      | -2.645556592 |
| DCAF8        | -0.109948548    | 4.800691042        | -3.107248986 | 0.002646724 | 0.013527152      | -2.694428633 |
| C15orf39     | -0.175535283    | 5.695733119        | -3.107371294 | 0.002645753 | 0.013527152      | -2.73601278  |
| RASAL2       | -0.3041523      | 5.004305336        | -3.10718389  | 0.002647241 | 0.013527152      | -2.74251476  |
| CCDC6        | -0.14809115     | 5.865198053        | -3.107686052 | 0.002643255 | 0.013527152      | -2.756485541 |
| DSEL         | -0.280431434    | 6.668897407        | -3.107020055 | 0.002648543 | 0.013529214      | -2.75988153  |
| DDHD1        | -0.193650932    | 4.077206096        | -3.105846047 | 0.002657888 | 0.013567749      | -2.638682534 |
| COPRS        | 0.198484851     | 6.113082845        | 3.105847982  | 0.002657873 | 0.013567749      | -2.762373657 |
| IKBKAP       | -0.363826379    | 4.73915097         | -3.105356163 | 0.002661797 | 0.013583098      | -2.701211577 |
| SPOUT1       | -0.115389496    | 3.969904111        | -3.104310808 | 0.002670155 | 0.013621137      | -2.622440127 |
| KCTD3        | -0.117293467    | 5.698796096        | -3.103661596 | 0.002675358 | 0.01364306       | -2.758350418 |
| RAB11B       | 0.164673873     | 6.45008476         | 3.102915327  | 0.002681351 | 0.013668993      | -2.772468669 |
| DDX18        | -0.173419152    | 5.681502694        | -3.102671081 | 0.002683315 | 0.013674378      | -2.767821756 |
| SHROOM3      | 0.302285492     | 4.119030279        | 3.102461945  | 0.002684998 | 0.013676946      | -2.607193569 |
| TIMM13       | 0.20746679      | 5.404898937        | 3.102382823  | 0.002685635 | 0.013676946      | -2.74893716  |
| SV2A         | 0.208708991     | 4.643727386        | 3.101588628  | 0.002692036 | 0.01370028       | -2.712798274 |
| FNBP4        | -0.199402378    | 4.497839246        | -3.101644554 | 0.002691585 | 0.01370028       | -2.713049348 |
| UTP15        | -0.143311527    | 3.664211041        | -3.101461015 | 0.002693066 | 0.013700892      | -2.591665999 |
| DBR1         | -0.12965895     | 3.651182318        | -3.100055481 | 0.002704433 | 0.013747352      | -2.609091304 |
| AKAP11       | -0.350018368    | 5.877948565        | -3.100007047 | 0.002704825 | 0.013747352      | -2.774321783 |
| DNTTIP2      | -0.118785016    | 6.084594931        | -3.09993418  | 0.002704936 | 0.013747352      | -2.776508706 |
| NDUFAB1      | 0.180779411     | 4.58934426         | 3.099828857  | 0.00270627  | 0.013749492      | -2.713731241 |
| BUB1         | -0.336158164    | 2.280603028        | -3.099449852 | 0.002709344 | 0.013760473      | -2.35795979  |
| DCBLD2       | -0.267612551    | 6.466069193        | -3.099080938 | 0.00271234  | 0.013771046      | -2.781693066 |
| DIP2A        | 0.210268816     | 4.319463277        | 3.098568869  | 0.002716504 | 0.013787539      | -2.677357258 |
| CCDC125      | -0.232021985    | 2.511687493        | -3.098396391 | 0.002717908 | 0.013790017      | -2.369096966 |
| ZFP3         | 0.216819514     | 1.959823545        | 3.096840666  | 0.0027306   | 0.01384975       | -2.395465805 |
| VPSS1        | 0.14518029      | 6.821742012        | 3.095901674  | 0.002738287 | 0.013884066      | -2.789837187 |
| CTSD         | 0.159126075     | 9.474059248        | 3.095166389  | 0.002744321 | 0.013909978      | -2.668003238 |
| GPR180       | -0.322448824    | 3.676088733        | -3.094903557 | 0.002746481 | 0.013916242      | -2.639809648 |
| CPT1A        | -0.258198993    | 5.590222817        | -3.094745521 | 0.00274778  | 0.013918145      | -2.782857861 |
| TUBB6        | 0.161327025     | 8.062682417        | 3.094274586  | 0.002751656 | 0.013933091      | -2.739364202 |
| NDUFAF4      | -0.16634642     | 3.206151095        | -3.092740825 | 0.002764313 | 0.013987644      | -2.556683763 |
| KIF11        | -0.275378453    | 3.535164154        | -3.092766635 | 0.0027641   | 0.013987644      | -2.595046368 |
| PSMB9        | 0.215358907     | 4.013991351        | 3.092631771  | 0.002765215 | 0.013987644      | -2.661317174 |
| GFPT1        | -0.212217339    | 6.436910723        | -3.092398771 | 0.002767143 | 0.013992698      | -2.801575402 |
| LRCH3        | -0.240218941    | 5.101604955        | -3.091266046 | 0.002776535 | 0.014035477      | -2.777882887 |
| PSYL         | -0.22501929     | 3.700438311        | -3.090639541 | 0.002781742 | 0.014057082      | -2.631964234 |
| PPP2R2A      | -0.12463102     | 4.876669053        | -3.090262911 | 0.002784877 | 0.014068204      | -2.76041505  |
| C5orf38      | 0.233700657     | 3.382865184        | 3.089899905  | 0.002787901 | 0.014078761      | -2.581147667 |
| SATB2        | -0.270461736    | 3.051674447        | -3.088817348 | 0.002796939 | 0.014119667      | -2.575028404 |
| SCX          | 0.537682925     | -0.85473243        | 3.088510961  | 0.002799502 | 0.01412787       | -1.920475454 |
| MAGEE1       | 0.161932692     | 2.407857495        | 3.088395711  | 0.002800466 | 0.014128005      | -2.46681517  |
| TGIF2        | -0.236172659    | 2.247703574        | -3.087076231 | 0.002811532 | 0.014176447      | -2.446376278 |
| MRPS34       | 0.225776397     | 5.533484798        | 3.087026378  | 0.00281195  | 0.014176447      | -2.796830439 |
| C6orf89      | -0.182042308    | 7.376734771        | -3.086881356 | 0.002813169 | 0.014177846      | -2.798293269 |
| UTP3         | -0.114108965    | 5.568817662        | -3.086086034 | 0.002819862 | 0.014206825      | -2.796236267 |
| APBB1        | 0.104244335     | 5.818094618        | 3.085815982  | 0.002822138 | 0.014213538      | -2.81020311  |
| PSMD1        | 0.10470294      | 7.224594903        | 3.08552832   | 0.002824565 | 0.014221003      | -2.801871243 |
| LVRN         | -0.411002856    | 1.277681733        | -3.085326331 | 0.002826269 | 0.014224832      | -2.227486264 |
| MACROD1      | 0.23092097      | 3.642518694        | 3.084267102  | 0.002835225 | 0.014265141      | -2.638607612 |
| STX11        | -0.701773762    | -1.386777973       | -3.083443639 | 0.002842206 | 0.014295489      | -1.799149068 |
| MKL1         | -0.160273069    | 5.692887945        | -3.082211098 | 0.002852684 | 0.014343403      | -2.820942339 |
| NUDC         | 0.175361879     | 6.365107232        | 3.080138368  | 0.002870387 | 0.014427595      | -2.83564384  |
| USP31        | -0.180447546    | 2.433152368        | -3.079967021 | 0.002871855 | 0.014430159      | -2.512582196 |
| LOC100132215 | 0.789901296     | -1.939247579       | 3.079197519  | 0.002878456 | 0.014458505      | -1.779297438 |
| THAP8        | 0.236471827     | 3.635757337        | 3.078579434  | 0.002883768 | 0.014480361      | -2.665557118 |
| AGPAT4       | 0.188421872     | 4.109336602        | 3.078208687  | 0.002886959 | 0.014491553      | -2.736064839 |
| REPS1        | -0.083052735    | 4.849108226        | -3.076087658 | 0.002905278 | 0.014568942      | -2.791465462 |
| AFG3L2       | -0.118384059    | 4.933753665        | -3.076137009 | 0.00290485  | 0.014568942      | -2.804239914 |
| TRUB2        | 0.10247641      | 5.085169387        | 3.076264066  | 0.00290375  | 0.014568942      | -2.809112522 |
| PABPC4L      | -0.451767895    | -0.706390466       | -3.075733726 | 0.002908345 | 0.014569772      | -1.933158312 |
| AGO4         | -0.168281411    | 2.859436633        | -3.075841675 | 0.002907409 | 0.014569772      | -2.574936708 |
| MRPS12       | 0.176945563     | 4.450247872        | 3.075774071  | 0.002907995 | 0.014569772      | -2.765754248 |
| CENPO        | -0.191374034    | 2.692659138        | -3.075213322 | 0.00291286  | 0.014587542      | -2.557134193 |
| IGF2BP1      | -0.270442842    | 2.940781826        | -3.075011126 | 0.002914616 | 0.014591486      | -2.586201621 |

| Gene       | Log fold change | Average Expression | t            | P-value     | Adjusted P-value | B            |
|------------|-----------------|--------------------|--------------|-------------|------------------|--------------|
| SMC3       | -0.119862034    | 5.583223219        | -3.074762157 | 0.00291678  | 0.014597467      | -2.838647951 |
| ULK2       | -0.149704955    | 4.448339808        | -3.074520995 | 0.002918878 | 0.014603112      | -2.75162511  |
| PSMB10     | 0.208515123     | 3.224473978        | 3.073988158  | 0.002923517 | 0.014615815      | -2.607553023 |
| EIF1       | 0.149594451     | 8.906277667        | 3.074116847  | 0.002922395 | 0.014615815      | -2.773579222 |
| WTAP       | -0.132749808    | 6.414560728        | -3.073895112 | 0.002924327 | 0.014615815      | -2.853150945 |
| ATG4D      | 0.257063625     | 1.488687401        | 3.072585059  | 0.002935765 | 0.014668114      | -2.296429025 |
| PGA5       | 0.904377755     | -3.408491666       | 3.071062858  | 0.002949107 | 0.014720129      | -1.734566877 |
| KLHL18     | -0.24679297     | 3.893727947        | -3.071178196 | 0.002948094 | 0.014720129      | -2.735776096 |
| ZHX1       | -0.160437343    | 5.362812707        | -3.071085847 | 0.002948905 | 0.014720129      | -2.836125237 |
| MYL12A     | 0.123609594     | 7.295952438        | 3.070775838  | 0.002951629 | 0.014722961      | -2.842148103 |
| AP1B1      | 0.09071337      | 5.995006169        | 3.070781128  | 0.002951583 | 0.014722961      | -2.858796203 |
| DYNLL1     | 0.201724178     | 7.134025524        | 3.070657799  | 0.002952667 | 0.014723263      | -2.855940013 |
| ZBTB46     | -0.224937459    | 1.894438849        | -3.070298729 | 0.002955826 | 0.014734138      | -2.418467929 |
| IRF2BPL    | 0.210956756     | 5.950122269        | 3.069599581  | 0.002961986 | 0.01475996       | -2.85711591  |
| RBM38      | 0.171796065     | 3.228707059        | 3.068869221  | 0.002968434 | 0.014787198      | -2.677073581 |
| ST6GALNAC6 | 0.104594787     | 7.106005849        | 3.068362761  | 0.002972913 | 0.014804613      | -2.858309595 |
| SHC4       | 0.537157872     | -1.261508947       | 3.066861904  | 0.002986222 | 0.014851254      | -1.922275801 |
| DHTKD1     | -0.193050147    | 3.421786634        | -3.0670758   | 0.002984322 | 0.014851254      | -2.646735403 |
| FPGS       | 0.12253318      | 5.455366822        | 3.066963105  | 0.002985323 | 0.014851254      | -2.853020726 |
| DCLK1      | -0.315675353    | 6.579926979        | -3.066896696 | 0.002985913 | 0.014851254      | -2.870748046 |
| CXXC1      | 0.162821024     | 4.920979352        | 3.066611218  | 0.002988451 | 0.014857432      | -2.802382125 |
| PSMD10     | 0.121405799     | 5.035091867        | 3.066396146  | 0.002990364 | 0.014862038      | -2.826932841 |
| MRPL52     | 0.204023745     | 4.79200436         | 3.065380168  | 0.002999416 | 0.014897709      | -2.811661768 |
| NDUFB4     | 0.211562932     | 5.579987555        | 3.065368691  | 0.002999519 | 0.014897709      | -2.859477718 |
| SMIM4      | 0.275459732     | 2.774673316        | 3.064349666  | 0.003008624 | 0.014933087      | -2.570808288 |
| PFN1       | 0.218077042     | 7.975288258        | 3.064442135  | 0.003007797 | 0.014933087      | -2.836255121 |
| COMMD2     | -0.144836995    | 4.936189334        | -3.063966823 | 0.003012052 | 0.014945175      | -2.83644175  |
| GPR135     | -0.256690884    | 0.559586414        | -3.06344854  | 0.003016698 | 0.014956445      | -2.184903439 |
| KIF18A     | -0.376675245    | 1.06605173         | -3.063572719 | 0.003015584 | 0.014956445      | -2.208674927 |
| FANCE      | -0.217801998    | 2.641553643        | -3.063381229 | 0.003017302 | 0.014956445      | -2.56627991  |
| GPS2       | 0.658519705     | -1.474751121       | 3.06249738   | 0.003025242 | 0.01499087       | -1.887678282 |
| ASNA1      | 0.16037311      | 6.525493091        | 3.06209798   | 0.003028836 | 0.015003745      | -2.885505577 |
| HIST3H2A   | 0.267781766     | 2.310592735        | 3.060779591  | 0.003040729 | 0.015057706      | -2.468117858 |
| PLD3       | 0.128900321     | 8.611185723        | 3.059731346  | 0.003050216 | 0.015099721      | -2.816316297 |
| SLC4A7     | -0.489781805    | 3.934628563        | -3.058959556 | 0.003057215 | 0.015124465      | -2.763562251 |
| NAA50      | -0.171237834    | 7.297121091        | -3.058959103 | 0.003057222 | 0.015124465      | -2.873169886 |
| NEURL2     | 0.579607559     | -1.729203655       | 3.058540131  | 0.00306103  | 0.015133362      | -1.860849119 |
| MUTYH      | 0.233186651     | 2.239168178        | 3.058635021  | 0.003060167 | 0.015133362      | -2.467290278 |
| ZNF333     | -0.231263858    | 3.011875632        | -3.056815913 | 0.003076746 | 0.01520607       | -2.659651437 |
| CDK2AP2    | 0.228928763     | 4.61882228         | 3.056622486  | 0.003078514 | 0.015209816      | -2.817712038 |
| METTL2B    | -0.146387117    | 3.308782423        | -3.055796975 | 0.003086069 | 0.015237148      | -2.687333193 |
| FAT4       | -0.419311492    | 5.258213049        | -3.055836076 | 0.00308571  | 0.015237148      | -2.87206045  |
| ALG13      | -0.120061419    | 4.065535617        | -3.055385974 | 0.003089836 | 0.015250752      | -2.789393821 |
| CCDC36     | 0.34821048      | 0.388094421        | 3.055270957  | 0.003090892 | 0.015250964      | -2.194519468 |
| BFAR       | 0.078825399     | 6.394921202        | 3.055153058  | 0.003091974 | 0.015251307      | -2.904522379 |
| B9D2       | 0.266008018     | 1.552679943        | 3.054946499  | 0.00309387  | 0.015255666      | -2.346079661 |
| NEK9       | -0.1802929      | 7.237998999        | -3.054605672 | 0.003097002 | 0.01526611       | -2.890683848 |
| VSTM2L     | 0.250264363     | 2.574870925        | 3.054152026  | 0.003101174 | 0.015281679      | -2.594142934 |
| CTPS2      | -0.152787458    | 3.313468486        | -3.053945146 | 0.003103079 | 0.015286064      | -2.665641951 |
| ZFPL1      | 0.169845099     | 2.518879796        | 3.053193803  | 0.003110006 | 0.015315176      | -2.52706686  |
| PDCD5      | 0.201946999     | 5.35698653         | 3.05138532   | 0.003126737 | 0.015392536      | -2.889875828 |
| H3F3B      | -0.12422195     | 7.944467256        | -3.051042621 | 0.003129916 | 0.015403156      | -2.88516089  |
| SF3B5      | 0.127304006     | 6.09053585         | 3.050522149  | 0.003134752 | 0.015421913      | -2.915065009 |
| CCM2       | 0.140694263     | 5.767071259        | 3.050025651  | 0.00313937  | 0.015439594      | -2.908218892 |
| ABHD13     | -0.230958201    | 4.122296236        | -3.04981278  | 0.003141353 | 0.015444301      | -2.784027067 |
| LINC01336  | 0.826781708     | -2.653768092       | 3.049021102  | 0.003148735 | 0.015475545      | -1.824336334 |
| HNRNPA1L2  | 0.348860273     | -0.199861615       | 3.048443038  | 0.003154136 | 0.015497032      | -2.094837596 |
| DES        | 0.307466105     | 2.019513904        | 3.0481127    | 0.003157226 | 0.015502102      | -2.502165167 |
| DIMT1      | -0.09023054     | 5.127065329        | -3.04812025  | 0.003157155 | 0.015502102      | -2.896840959 |
| EPM2AIP1   | -0.113929734    | 5.019399446        | -3.047920136 | 0.003159028 | 0.015505899      | -2.879674223 |
| PREPL      | -0.205300801    | 5.383620706        | -3.047735379 | 0.003160759 | 0.015509339      | -2.898924363 |
| MRPS18B    | 0.150192492     | 5.352103989        | 3.047375156  | 0.003164135 | 0.01552085       | -2.902219248 |
| RGS2       | -0.269670896    | 1.942536116        | -3.04707967  | 0.003166907 | 0.015529391      | -2.487060115 |
| RNF5       | 0.20448704      | 3.540493759        | 3.046893782  | 0.003168652 | 0.015532892      | -2.717287986 |
| DNAJC8     | 0.126109113     | 6.531032084        | 3.045951446  | 0.003177512 | 0.015571257      | -2.92967064  |
| MBLAC2     | -0.171688284    | 2.671706852        | -3.045639692 | 0.003180448 | 0.015580578      | -2.635756256 |
| RNP1       | -0.211564633    | 7.86714704         | -3.045445183 | 0.003182282 | 0.01558449       | -2.887342784 |
| RUNX1      | -0.289866379    | 7.370506412        | -3.045145387 | 0.003185109 | 0.015593268      | -2.92631923  |
| PITX2      | 0.213803997     | 3.182327469        | 3.045003919  | 0.003186444 | 0.015594736      | -2.72860433  |
| RALB       | 0.091879153     | 6.499990368        | 3.044626243  | 0.003190011 | 0.015607121      | -2.933293212 |

| Gene         | Log fold change | Average Expression | t            | P-value     | Adjusted P-value | B            |
|--------------|-----------------|--------------------|--------------|-------------|------------------|--------------|
| NHP2         | 0.187403474     | 4.207039506        | 3.043917491  | 0.003196714 | 0.01563484       | -2.824870741 |
| MMAB         | 0.180705177     | 4.901683566        | 3.043211548  | 0.003203404 | 0.015662474      | -2.879876006 |
| LINC00565    | -0.297281615    | 0.942016633        | -3.042972973 | 0.003205668 | 0.015663374      | -2.278594869 |
| PRDX6        | 0.146719098     | 7.815454763        | 3.04307792   | 0.003204672 | 0.015663374      | -2.901173354 |
| SOAT1        | -0.18728335     | 6.466205691        | -3.042666098 | 0.003208582 | 0.015672529      | -2.93831332  |
| RBM45        | -0.149132541    | 2.892165106        | -3.042258637 | 0.003212455 | 0.015686361      | -2.652542571 |
| ZNF45        | -0.179048268    | 3.296168803        | -3.040359302 | 0.003230566 | 0.015769685      | -2.757656866 |
| ATP10D       | -0.41113726     | 4.824328417        | -3.040068024 | 0.003233352 | 0.015778171      | -2.910477843 |
| PARM1        | 0.635118101     | -1.556682715       | 3.036876435  | 0.003264023 | 0.015922684      | -1.963113123 |
| MOCOS        | -0.234966378    | 4.12417174         | -3.03661282  | 0.003266569 | 0.015929942      | -2.805350469 |
| CRTC1        | 0.141452635     | 4.795920447        | 3.036252682  | 0.003270049 | 0.015941754      | -2.887013055 |
| MTUS1        | -0.486237873    | 2.608450198        | -3.034341899 | 0.003288573 | 0.016021688      | -2.58379181  |
| FOSL2        | 0.300494217     | 7.248480997        | 3.034415987  | 0.003287853 | 0.016021688      | -2.959526512 |
| RABAC1       | 0.222563666     | 6.766698705        | 3.033970747  | 0.003292182 | 0.016034087      | -2.960645793 |
| TTC31        | 0.157188578     | 3.697092878        | 3.033311768  | 0.003298599 | 0.016060149      | -2.766887392 |
| SHOC2        | -0.138806298    | 6.195389656        | -3.031750961 | 0.003313846 | 0.016129166      | -2.964902191 |
| DLX3         | -0.567666809    | 0.578335009        | -3.031407512 | 0.003317209 | 0.016135111      | -2.235254988 |
| ANXA2        | 0.140934565     | 9.537275773        | 3.031476823  | 0.00331653  | 0.016135111      | -2.835316434 |
| PHACTR2      | -0.186762455    | 4.383484695        | -3.031153233 | 0.003319702 | 0.016142022      | -2.885076336 |
| PPP4R2       | -0.151507966    | 5.013655155        | -3.030422633 | 0.003326872 | 0.01617167       | -2.928617872 |
| UNK          | 0.128979983     | 4.130567224        | 3.029619904  | 0.003334768 | 0.016203762      | -2.865271613 |
| KDM5B        | -0.281663778    | 6.442522007        | -3.029532753 | 0.003335626 | 0.016203762      | -2.97165797  |
| FAF2         | -0.241136198    | 6.253241232        | -3.028485868 | 0.003345951 | 0.016248681      | -2.977122828 |
| HNRNPDL      | 0.12162855      | 7.306849616        | 3.02833159   | 0.003347475 | 0.016250844      | -2.94818933  |
| TRAF6        | -0.23159688     | 3.075992013        | -3.027581337 | 0.003354896 | 0.01627638       | -2.722138428 |
| TMEM268      | -0.14980862     | 3.477255988        | -3.027588847 | 0.003354822 | 0.01627638       | -2.765205811 |
| ZNF706       | 0.137462393     | 5.017876886        | 3.027421173  | 0.003356483 | 0.016278832      | -2.935890123 |
| AFF3         | -0.40942381     | 3.499356198        | -3.025053251 | 0.003380015 | 0.016382416      | -2.751973801 |
| FH           | 0.140977601     | 5.951986842        | 3.025094501  | 0.003379604 | 0.016382416      | -2.984098828 |
| UNC50        | 0.104526756     | 4.338459046        | 3.024713348  | 0.003383406 | 0.016393575      | -2.88439383  |
| RALGPS1      | -0.210623822    | 1.396612326        | -3.024504256 | 0.003385493 | 0.016398414      | -2.410501154 |
| PLAGL2       | -0.194419767    | 3.823042757        | -3.023858405 | 0.003391948 | 0.016424398      | -2.830770084 |
| SOGA3        | -0.611848631    | -1.990824192       | -3.023649228 | 0.003394041 | 0.016429252      | -1.924050112 |
| TRMT11       | -0.139517776    | 3.148661232        | -3.022739207 | 0.00340316  | 0.016468104      | -2.754303384 |
| VAMP3        | 0.073590672     | 7.445697395        | 3.021838321  | 0.003412211 | 0.016506597      | -2.973334883 |
| UBB          | 0.149129324     | 7.657959032        | 3.021445712  | 0.003416162 | 0.016520406      | -2.970742817 |
| LINC00517    | -0.677251328    | -1.514099503       | -3.020647685 | 0.003424206 | 0.016553812      | -1.937616067 |
| ADCK5        | 0.235631786     | 1.932731035        | 3.020542518  | 0.003425268 | 0.016553812      | -2.50925082  |
| KSR2         | -0.86672982     | -2.97005806        | -3.020279196 | 0.003427927 | 0.01656135       | -1.865684928 |
| DENND5A      | -0.149717728    | 6.99456393         | -3.019864653 | 0.003432117 | 0.016576276      | -2.993243866 |
| MTG1         | 0.389579571     | -0.422084697       | 3.019684741  | 0.003433936 | 0.016578483      | -2.108618983 |
| PRR11        | -0.312609264    | 2.944184579        | -3.019601919 | 0.003434775 | 0.016578483      | -2.714573985 |
| C1orf122     | 0.212144317     | 5.217959147        | 3.018722623  | 0.003443684 | 0.016616161      | -2.971133011 |
| PDRG1        | 0.186481123     | 2.584883623        | 3.018544394  | 0.003445492 | 0.016619564      | -2.678057752 |
| PABPC4       | 0.134104683     | 8.668545728        | 3.017724814  | 0.00345382  | 0.0166544        | -2.928614127 |
| VHL          | -0.292131267    | 4.491115182        | -3.017334155 | 0.003457796 | 0.016668237      | -2.928381804 |
| RAB11FIP2    | -0.206127075    | 4.861563552        | -3.016938122 | 0.003461831 | 0.01668235       | -2.953052189 |
| KDELR1       | 0.12160724      | 8.391929352        | 3.016406757  | 0.003467252 | 0.016703129      | -2.947569314 |
| AFF4         | -0.415868853    | 6.712496149        | -3.015954577 | 0.003471871 | 0.016720034      | -3.009542921 |
| ESRRA        | 0.146777503     | 3.765314423        | 3.015724789  | 0.003474221 | 0.016726002      | -2.883178107 |
| GALNT18      | 0.459470608     | -1.140273082       | 3.013532332  | 0.003496712 | 0.016828906      | -2.06114182  |
| SOCS5        | -0.278199744    | 7.134241271        | -3.013076153 | 0.003501409 | 0.016846128      | -3.004042903 |
| CEBPD        | 0.362023444     | 5.811572083        | 3.012557613  | 0.003506755 | 0.016862173      | -3.001021656 |
| MDH1         | 0.093993993     | 6.580344457        | 3.012535549  | 0.003506983 | 0.016862173      | -3.020312069 |
| ZNF304       | -0.183360253    | 3.5065892          | -3.012290627 | 0.003509511 | 0.016868943      | -2.842144346 |
| ZBTB7A       | -0.138003173    | 6.778198068        | -3.011975602 | 0.003512764 | 0.016879197      | -3.019704809 |
| AP4B1        | 0.170182946     | 2.725771101        | 3.010332074  | 0.003529785 | 0.016955577      | -2.721455204 |
| C17orf97     | 0.291607636     | 1.192324686        | 3.009815767  | 0.003535148 | 0.016975924      | -2.458045151 |
| LOC100131315 | -0.342006427    | 1.188092122        | -3.009414514 | 0.003539321 | 0.016990547      | -2.435417548 |
| NOP53-AS1    | -0.660416167    | -2.216378921       | -3.009146844 | 0.003542108 | 0.016997997      | -1.963272599 |
| RFX7         | 0.334269012     | 4.621602837        | 3.008972286  | 0.003543926 | 0.016997997      | -3.003533767 |
| EPG5         | -0.312468399    | 5.233286024        | -3.008940364 | 0.003544258 | 0.016997997      | -3.012984835 |
| KAZALD1      | 0.178766708     | 4.758885464        | 3.008831461  | 0.003545393 | 0.016998028      | -2.976334756 |
| ILKAP        | 0.170339919     | 3.930917836        | 3.008370063  | 0.003550205 | 0.017015682      | -2.904940267 |
| RILP         | 0.242629953     | 3.234898733        | 3.00738641   | 0.003560484 | 0.017059519      | -2.790408452 |
| PEX14        | 0.172429691     | 3.954841805        | 3.0057802    | 0.003577327 | 0.017133935      | -2.89014742  |
| IFIT1        | 0.187237582     | 4.839778056        | 3.005688576  | 0.00357829  | 0.017133935      | -2.979146194 |
| LMAN2        | 0.111546675     | 7.138068809        | 3.005431315  | 0.003580995 | 0.01714144       | -3.029991936 |
| EBF3         | -0.267703633    | 2.839311784        | -3.005280962 | 0.003582577 | 0.017143565      | -2.775811664 |
| DENND4A      | -0.246270828    | 4.348926299        | -3.004477077 | 0.003591046 | 0.017178634      | -2.958606343 |

| Gene      | Log fold change | Average Expression | t            | P-value     | Adjusted P-value | B            |
|-----------|-----------------|--------------------|--------------|-------------|------------------|--------------|
| LINC02361 | -0.893071544    | -3.15911232        | -3.003458334 | 0.003601805 | 0.017220531      | -1.90453375  |
| FUCA2     | 0.096641672     | 6.180426224        | 3.003431378  | 0.003602091 | 0.017220531      | -3.044479844 |
| KIF21A    | 0.375678744     | -0.063609245       | 3.001848214  | 0.003618871 | 0.017295266      | -2.344352552 |
| ARL4A     | 0.376718214     | 2.033279854        | 3.001334871  | 0.003624328 | 0.017304875      | -2.497867694 |
| CYB5RL    | -0.364594147    | 2.209646715        | -3.001534288 | 0.003622207 | 0.017304875      | -2.643587014 |
| TSPAN14   | -0.162796309    | 5.552408422        | -3.001378341 | 0.003623866 | 0.017304875      | -3.032503085 |
| ICA1      | -0.95855773     | -3.493203843       | -2.999770365 | 0.003641006 | 0.017378338      | -1.893927647 |
| LACC1     | -0.193646625    | 3.97253754         | -2.999632844 | 0.003642475 | 0.017378338      | -2.91815416  |
| BCAR1     | -0.201785923    | 6.234415133        | -2.99956734  | 0.003643175 | 0.017378338      | -3.053732604 |
| BRD8      | 0.129307119     | 4.753636132        | 2.999053317  | 0.003648673 | 0.017399054      | -3.01201647  |
| BEND5     | 0.467484848     | -0.415516448       | 2.998756379  | 0.003651853 | 0.017406575      | -2.162382041 |
| MRPL12    | 0.265263111     | 2.881370395        | 2.998690226  | 0.003652561 | 0.017406575      | -2.773189309 |
| LAGE3     | 0.22282386      | 3.931347766        | 2.998331968  | 0.003656402 | 0.017413859      | -2.90743711  |
| MRPS11    | 0.146584905     | 4.228346631        | 2.998354382  | 0.003656161 | 0.017413859      | -2.943530813 |
| SPHK2     | 0.136168612     | 3.92285909         | 2.998093466  | 0.00365896  | 0.017420537      | -2.914875157 |
| PNPT1     | -0.136841804    | 4.003010283        | -2.997906515 | 0.003660967 | 0.017424584      | -2.928155077 |
| SMIM8     | -0.211897244    | 1.722345176        | -2.997305482 | 0.003667426 | 0.01744981       | -2.520286794 |
| CLCN3     | -0.224783357    | 6.391881101        | -2.996849275 | 0.003672335 | 0.017467652      | -3.063564566 |
| RBM23     | 0.072332433     | 5.705491777        | 2.996079932  | 0.003680628 | 0.017501571      | -3.054894355 |
| CCBE1     | -0.249566237    | 6.125474041        | -2.995621826 | 0.003685574 | 0.01751956       | -3.066394536 |
| SH2D5     | -0.286446798    | 0.982303741        | -2.994449522 | 0.00369826  | 0.017574316      | -2.552423705 |
| G6PC3     | 0.182320422     | 5.92118242         | 2.994132856  | 0.003701693 | 0.017585085      | -3.064979913 |
| DCAF1     | -0.246927104    | 4.62230697         | -2.993829498 | 0.003704985 | 0.017595176      | -3.01668615  |
| SKAP2     | -0.189523208    | 5.268826529        | -2.993630124 | 0.00370715  | 0.017599909      | -3.046893    |
| B4GALT2   | 0.123794629     | 7.165713686        | 2.992850562  | 0.003715627 | 0.017634596      | -3.06296039  |
| STOML1    | -0.161532097    | 3.962772903        | -2.992132854 | 0.003723447 | 0.017666145      | -2.918453224 |
| SLC16A6   | -0.835135192    | -2.646874378       | -2.991175002 | 0.003733908 | 0.017704624      | -1.973958166 |
| PLEKHM1   | -0.09518617     | 5.4942437          | -2.991230317 | 0.003733303 | 0.017704624      | -3.060634904 |
| ZNF200    | -0.157750499    | 2.57223761         | -2.990618143 | 0.003740002 | 0.017727938      | -2.766487907 |
| TJP1      | -0.214678462    | 6.104721058        | -2.99016833  | 0.003744931 | 0.017745719      | -3.0807604   |
| FAM207A   | 0.214561174     | 2.694020372        | 2.989355697  | 0.003753851 | 0.017782395      | -2.766538371 |
| OXA1L     | 0.139527206     | 7.301810593        | 2.988487009  | 0.003763409 | 0.017822065      | -3.071566861 |
| SSBP2     | -0.120218808    | 4.384750437        | -2.987784101 | 0.003771159 | 0.017853154      | -2.947875939 |
| PPP2R1B   | -0.15836664     | 4.035900846        | -2.987378578 | 0.003775637 | 0.017868737      | -2.975607579 |
| ZNF611    | -0.320429282    | 1.57365603         | -2.986972659 | 0.003780124 | 0.017884355      | -2.59892073  |
| THAP3     | 0.18091926      | 3.063095242        | 2.986432238  | 0.003786105 | 0.017907031      | -2.865874979 |
| FUBP1     | -0.126028143    | 4.945938243        | -2.985726823 | 0.003793927 | 0.017932761      | -3.061292524 |
| ARPC1B    | 0.159053847     | 7.195327395        | 2.985829832  | 0.003792784 | 0.017932761      | -3.081657181 |
| TSACC     | 1.011505621     | -3.312923599       | 2.985491129  | 0.003796543 | 0.0179395        | -1.93799442  |
| ZNF271P   | -0.081729039    | 5.283592734        | -2.984718354 | 0.003805134 | 0.017974454      | -3.068019752 |
| LRRC8D    | -0.17576271     | 3.795165132        | -2.984269497 | 0.003810132 | 0.017992421      | -2.927626263 |
| BRMS1L    | 0.109903927     | 3.461705376        | 2.984097791  | 0.003812045 | 0.017995816      | -2.912589898 |
| FANCG     | 0.14765943      | 3.719013258        | 2.983657467  | 0.003816956 | 0.018013356      | -2.917388699 |
| FKBP11    | 0.193232239     | 4.678925631        | 2.98301055   | 0.003824183 | 0.018041806      | -3.02909299  |
| NUDT11    | 0.101295923     | 3.682270677        | 2.981962709  | 0.003835914 | 0.018091486      | -2.953286223 |
| AFF1      | -0.346851628    | 4.747683154        | -2.980731548 | 0.00384974  | 0.018151013      | -3.036774046 |
| PQB1      | 0.223585407     | 5.425430869        | 2.980494188  | 0.003852411 | 0.018157922      | -3.082124624 |
| SERPINA5  | 0.728220602     | -2.593247029       | -2.980147515 | 0.003856315 | 0.018170638      | -1.998160648 |
| UBQLN2    | -0.084164572    | 6.227759362        | -2.980023561 | 0.003857712 | 0.018171536      | -3.108858436 |
| DCTN3     | 0.160904861     | 5.357606069        | 2.979883524  | 0.003859291 | 0.018173289      | -3.083218599 |
| BHLHE22   | -0.544477457    | -0.093730697       | -2.979435302 | 0.003864347 | 0.018191415      | -2.255475226 |
| SLC25A44  | -0.207631261    | 5.241383375        | -2.978903884 | 0.00387035  | 0.018213983      | -3.08052639  |
| PHPT1     | 0.214810458     | 5.898789705        | 2.978669176  | 0.003873005 | 0.018220781      | -3.104942522 |
| NDUFAF8   | 0.242692366     | 4.410149802        | 2.977984608  | 0.003880756 | 0.018251546      | -3.020062495 |
| XIRP1     | -0.663840007    | -0.855075934       | -2.977793481 | 0.003882922 | 0.018256036      | -2.156944156 |
| ENGASE    | 0.217455302     | 2.209327188        | 2.977327363  | 0.003888211 | 0.018270922      | -2.715143526 |
| PSMB5     | 0.132317116     | 6.55828956         | 2.977300644  | 0.003888514 | 0.018270922      | -3.116010248 |
| TTC17     | -0.163419108    | 5.724350638        | -2.977068732 | 0.003891148 | 0.018277597      | -3.104178337 |
| CDC42EP1  | -0.201147684    | 6.684426529        | -2.97620108  | 0.003901017 | 0.018318242      | -3.11875477  |
| ZNF432    | -0.208749582    | 2.274554503        | -2.975885171 | 0.003904616 | 0.018323718      | -2.77180269  |
| NOP53     | 0.204445082     | 8.505795059        | 2.975985967  | 0.003903467 | 0.018323718      | -3.05283666  |
| UBE2Z     | -0.083084835    | 6.738731405        | -2.974474945 | 0.00392072  | 0.01839356       | -3.121421529 |
| OCIAD1    | 0.093579758     | 6.333449809        | 2.974117335  | 0.003924813 | 0.018407031      | -3.125024232 |
| LRCH2     | -0.282524481    | 2.249260565        | -2.972920466 | 0.003938542 | 0.018465668      | -2.680513743 |
| MSANTD3   | -0.091462778    | 5.643247655        | -2.972811299 | 0.003939796 | 0.018465802      | -3.115837082 |
| ACVR1C    | 0.616701739     | -1.251778051       | 2.972393606  | 0.003944599 | 0.018482564      | -2.109037918 |
| NEK7      | -0.282971631    | 6.550585388        | -2.971504244 | 0.003954844 | 0.018519144      | -3.126323238 |
| PPP1CC    | 0.070016284     | 6.780655583        | 2.971502421  | 0.003954865 | 0.018519144      | -3.128398591 |
| RAB9B     | -0.264213504    | 0.7852346          | -2.971032164 | 0.003960292 | 0.018527279      | -2.464416322 |
| ZBTB37    | -0.233352862    | 2.286955537        | -2.971179694 | 0.003958589 | 0.018527279      | -2.767727418 |

| Gene         | Log fold change | Average Expression | t            | P-value     | Adjusted P-value | B            |
|--------------|-----------------|--------------------|--------------|-------------|------------------|--------------|
| EAPP         | 0.106061535     | 4.824822442        | 2.971057341  | 0.003960001 | 0.018527279      | -3.073236034 |
| POR          | 0.127544807     | 6.620584154        | 2.970446605  | 0.003967059 | 0.018553176      | -3.134256835 |
| IFI6         | 0.217841623     | 5.483341641        | 2.969982881  | 0.003972426 | 0.01857251       | -3.11517176  |
| PTGS2        | 0.626390908     | 2.583827388        | 2.969855433  | 0.003973902 | 0.018573647      | -2.733191699 |
| GOT2         | 0.095821581     | 5.850446217        | 2.969676403  | 0.003975977 | 0.018577579      | -3.129058915 |
| IKZF4        | -0.16210915     | 2.713697658        | -2.969281434 | 0.003980557 | 0.018581689      | -2.819707983 |
| PRPF39       | 0.177618503     | 3.247166238        | 2.969330569  | 0.003979987 | 0.018581689      | -2.947305175 |
| TMED5        | -0.177047485    | 5.854946392        | -2.969307412 | 0.003980256 | 0.018581689      | -3.132957013 |
| SYNJ2BP      | -0.164096229    | 4.053917993        | -2.968745115 | 0.003986784 | 0.018601751      | -3.004979002 |
| KIF13A       | -0.18309242     | 6.371284462        | -2.96869862  | 0.003987324 | 0.018601751      | -3.139204476 |
| AATBC        | 0.926318389     | -2.984673416       | 2.968104098  | 0.003994239 | 0.018628239      | -2.016264791 |
| SRRM1        | -0.206203128    | 5.307009885        | -2.96757254  | 0.00400043  | 0.01865134       | -3.121743404 |
| ID4          | -0.361605603    | 3.327427716        | -2.967351794 | 0.004003004 | 0.018657566      | -2.753610811 |
| TBL1X        | -0.139010658    | 5.878280617        | -2.967016383 | 0.004006918 | 0.01867003       | -3.13811601  |
| PCTP         | -0.127101314    | 2.682131371        | -2.966546226 | 0.00401241  | 0.018684061      | -2.898027552 |
| ENO1         | 0.137639994     | 9.952647571        | 2.966579611  | 0.004012019 | 0.018684061      | -2.98249645  |
| TPST1        | -0.103344017    | 5.469395438        | -2.966336426 | 0.004014863 | 0.018689706      | -3.116435528 |
| C9orf142     | 0.243451031     | 3.801320897        | 2.966037007  | 0.004018366 | 0.018700235      | -2.976516381 |
| SEC14L2      | 0.183466644     | 2.301861406        | 2.965870133  | 0.004020319 | 0.018703548      | -2.791168743 |
| RARA-AS1     | -0.358669227    | -0.565213073       | -2.965008847 | 0.004030416 | 0.018739735      | -2.254291776 |
| ZNF215       | -0.301597905    | 0.689767743        | -2.964994439 | 0.004030586 | 0.018739735      | -2.461081003 |
| KIAA1524     | -0.259800596    | 2.209132728        | -2.964873894 | 0.004032001 | 0.01874053       | -2.739131047 |
| RUVBL2       | 0.160981388     | 5.954084984        | 2.96383231   | 0.004044247 | 0.018791654      | -3.14772321  |
| PHB2         | 0.119995964     | 7.600168507        | 2.963522135  | 0.004047901 | 0.018802831      | -3.128161649 |
| C11orf54     | -0.223145719    | 4.140439788        | -2.963121517 | 0.004052624 | 0.018818969      | -3.035629519 |
| TRIM66       | -0.3544542      | 1.334224702        | -2.962888683 | 0.004055372 | 0.018825924      | -2.547004208 |
| KIF1C        | 0.105475806     | 7.700806025        | 2.962766238  | 0.004056818 | 0.018826833      | -3.123680805 |
| CHCHD2       | 0.178151442     | 6.374600965        | 2.962625795  | 0.004058476 | 0.01882873       | -3.155667018 |
| TBC1D10A     | -0.256093096    | 3.008107458        | -2.962270007 | 0.004062681 | 0.018839201      | -2.888338926 |
| SRFBP1       | -0.215417713    | 3.284320713        | -2.96222321  | 0.004063234 | 0.018839201      | -2.919850298 |
| PLEKHF2      | 0.206179172     | 3.218555619        | 2.962022986  | 0.004065603 | 0.018844382      | -2.954853903 |
| LOC100507156 | -0.846207661    | -2.857566301       | -2.96162034  | 0.004070369 | 0.018855066      | -2.037590018 |
| SPAST        | -0.294505937    | 3.88659037         | -2.961616809 | 0.004070411 | 0.018855066      | -3.01870439  |
| MRPL1        | 0.144016329     | 4.500614804        | 2.961411609  | 0.004072842 | 0.018860528      | -3.066703905 |
| AQP3         | 0.331184789     | 0.970927904        | 2.960957475  | 0.004078228 | 0.018879663      | -2.520903276 |
| SNX22        | 0.67039415      | -1.877114631       | 2.960674849  | 0.004081583 | 0.018889389      | -2.090764559 |
| ZNF141       | -0.298564368    | 1.543141822        | -2.959827118 | 0.004091661 | 0.018930214      | -2.672433562 |
| KAT2B        | -0.187184045    | 4.178412729        | -2.959324497 | 0.004097647 | 0.018952089      | -3.041223975 |
| INCA1        | -0.249315437    | 0.63798366         | -2.958719356 | 0.004104865 | 0.018979645      | -2.458593435 |
| RPLP2        | 0.224905678     | 9.431971875        | 2.958279054  | 0.004110124 | 0.018998131      | -3.047605149 |
| PTPN3        | 0.685785023     | -2.791365657       | 2.958167627  | 0.004111456 | 0.018998458      | -2.078168556 |
| ZNF317       | -0.144154906    | 5.033866321        | -2.957958287 | 0.004113959 | 0.019004196      | -3.127385674 |
| YTHDF1       | -0.099698967    | 5.584664389        | -2.957438587 | 0.00412018  | 0.019027099      | -3.157010409 |
| SEC61G       | 0.108319776     | 5.112313751        | 2.956423531  | 0.004132356 | 0.019077478      | -3.14084295  |
| CAPN5        | 0.131061608     | 5.82510044         | 2.955621192  | 0.004142004 | 0.019110304      | -3.168954719 |
| PFKM         | -0.087160968    | 5.982296008        | -2.955711839 | 0.004140913 | 0.019110304      | -3.170344038 |
| NRAV         | 0.197458903     | 2.256918932        | 2.955376147  | 0.004144954 | 0.01911221       | -2.777520353 |
| ELMSAN1      | -0.28016209     | 4.077134731        | -2.955425221 | 0.004144363 | 0.01911221       | -3.025971016 |
| ZSWIM1       | -0.231302318    | 2.715969509        | -2.955103305 | 0.004148242 | 0.019115667      | -2.895644915 |
| STMN3        | 0.16406282      | 5.267413734        | 2.955190626  | 0.004147189 | 0.019115667      | -3.147771624 |
| CYTH3        | -0.160721244    | 6.091493826        | -2.954291696 | 0.004158036 | 0.019154939      | -3.177292136 |
| MPHOSPH8     | -0.193653809    | 5.147377378        | -2.953962794 | 0.004162011 | 0.01916739       | -3.140113126 |
| PAIP2        | 0.080870469     | 4.596712723        | 2.95384647   | 0.004163418 | 0.019168008      | -3.113427209 |
| SNHG7        | 0.245796123     | 4.710643947        | 2.953252015  | 0.004170613 | 0.019195269      | -3.104470866 |
| IZUMO4       | 0.523279862     | -1.203796924       | 2.952927857  | 0.004174542 | 0.019201618      | -2.179679614 |
| DYNC2H1      | -0.260345631    | 5.390360281        | -2.952951873 | 0.004174251 | 0.019201618      | -3.162613896 |
| NBEAL1       | -0.454562921    | 2.227153232        | -2.952253771 | 0.004182722 | 0.019233373      | -2.803787577 |
| ESPL1        | 0.271387345     | 1.293888101        | 2.951699111  | 0.004189465 | 0.019258497      | -2.684716474 |
| KANK3        | 0.793660294     | -4.44364303        | 2.951357516  | 0.004193622 | 0.01927139       | -2.005097037 |
| ATP7A        | -0.423891192    | 3.842874305        | -2.951258485 | 0.004194828 | 0.01927139       | -3.041714295 |
| WWC1         | 0.294606149     | 1.205063327        | 2.950441304  | 0.004204792 | 0.019299507      | -2.683271977 |
| C14orf2      | 0.1866147118    | 5.719266409        | 2.950611484  | 0.004202715 | 0.019299507      | -3.175811005 |
| MRAS         | -0.130143587    | 6.095586284        | -2.950496359 | 0.00420412  | 0.019299507      | -3.1871552   |
| NPDC1        | 0.19257324      | 6.196191707        | 2.950196053  | 0.004207786 | 0.019307368      | -3.186494823 |
| KLHL2        | -0.166288119    | 3.258042699        | -2.949218125 | 0.004219746 | 0.019356351      | -2.976829969 |
| C1QBP        | 0.167884854     | 6.028495869        | 2.9475336    | 0.004240422 | 0.019439354      | -3.194227898 |
| PRDX4        | 0.123997115     | 6.623623549        | 2.947540959  | 0.004240331 | 0.019439354      | -3.195222988 |
| TPRG1        | -0.310028586    | 0.751669721        | -2.946903456 | 0.00424818  | 0.019460915      | -2.460374145 |
| DLG1         | -0.151709704    | 5.616546403        | -2.946836861 | 0.004249001 | 0.019460915      | -3.183788958 |
| PSMB4        | 0.170235617     | 7.200529837        | 2.94687596   | 0.004248519 | 0.019460915      | -3.186560349 |

| Gene      | Log fold change | Average Expression | t            | P-value     | Adjusted P-value | B            |
|-----------|-----------------|--------------------|--------------|-------------|------------------|--------------|
| RORB      | 0.831437465     | -2.553213369       | 2.945628026  | 0.004263924 | 0.019523327      | -2.087893428 |
| AMACR     | 0.251864831     | 1.191093028        | 2.945307715  | 0.004267886 | 0.019523666      | -2.609028628 |
| IL27RA    | 0.346664358     | 1.690024939        | 2.94543114   | 0.004266359 | 0.019523666      | -2.726160925 |
| KIF20A    | -0.314263816    | 3.429055651        | -2.945390919 | 0.004266856 | 0.019523666      | -2.956524503 |
| FAM214A   | 0.22054731      | 3.816023579        | 2.944981383  | 0.004271926 | 0.019536215      | -3.040958815 |
| RSPO3     | -0.38581799     | 5.770080018        | -2.944542214 | 0.004277369 | 0.01955517       | -3.178459468 |
| TBC1D8B   | -0.220029875    | 4.104027406        | -2.942272464 | 0.004305601 | 0.019674592      | -3.103634165 |
| PRKCI     | -0.166895915    | 4.603567934        | -2.942232261 | 0.004306103 | 0.019674592      | -3.145159352 |
| CDC14B    | -0.206342846    | 5.582746181        | -2.942084452 | 0.004307947 | 0.019677053      | -3.200609341 |
| KCCAT198  | -0.814077069    | -3.252864253       | -2.941517413 | 0.004315031 | 0.019697462      | -2.045730426 |
| NCOA6     | -0.165707327    | 5.350914944        | -2.941586276 | 0.00431417  | 0.019697462      | -3.199391817 |
| PLEKHG1   | -0.35250777     | 4.577222543        | -2.941386175 | 0.004316672 | 0.019698984      | -3.12333964  |
| ATOX1     | 0.173135301     | 5.108728754        | 2.939465747  | 0.004340751 | 0.019802867      | -3.176495658 |
| EXOC2     | 0.115236858     | 4.851660866        | 2.939115371  | 0.004345157 | 0.019816968      | -3.161422387 |
| VCP       | 0.082518663     | 8.752860766        | 2.9386283    | 0.00435129  | 0.01983893       | -3.124014983 |
| USP28     | 0.17025667      | 4.548020771        | 2.938202308  | 0.00435666  | 0.019857404      | -3.133723588 |
| HEG1      | -0.4610481      | 8.25907164         | -2.937815475 | 0.004361541 | 0.019873641      | -3.150516426 |
| GLOD4     | 0.111799108     | 5.317713316        | 2.937501974  | 0.004365501 | 0.01988567       | -3.198390046 |
| VPS13C    | -0.344000702    | 5.285139556        | -2.935699298 | 0.004388336 | 0.019983644      | -3.207775039 |
| PKIG      | 0.212773007     | 7.035308689        | 2.935479122  | 0.004391133 | 0.019990336      | -3.219091248 |
| KCTD20    | -0.148644869    | 6.640818084        | -2.93528051  | 0.004393657 | 0.019995784      | -3.227574974 |
| BAP1      | 0.067273446     | 6.297394016        | 2.934686814  | 0.00440121  | 0.020024109      | -3.230532581 |
| LUCAT1    | -0.929650383    | -4.245620305       | -2.933754732 | 0.004413092 | 0.020072107      | -2.0495291   |
| EIF3A     | -0.143988975    | 8.725321525        | -2.932458485 | 0.004429666 | 0.020141409      | -3.14261104  |
| MKRN1     | 0.064317405     | 6.539805385        | 2.932099215  | 0.00443427  | 0.020156258      | -3.237179652 |
| SLC6A17   | 0.512802372     | -0.265040207       | 2.931850076  | 0.004437465 | 0.020163184      | -2.446999117 |
| PTAR1     | -0.209117587    | 4.667948221        | -2.931771708 | 0.00443847  | 0.020163184      | -3.184245203 |
| BHLHB9    | -0.190585849    | 2.906496659        | -2.931125886 | 0.004446765 | 0.020194773      | -2.955543947 |
| NUDT3     | -0.136240447    | 4.210213457        | -2.9305981   | 0.004453553 | 0.020219508      | -3.131915286 |
| DDOST     | 0.093687588     | 7.916032235        | 2.930183016  | 0.004458899 | 0.02023768       | -3.200250087 |
| ARFGEF2   | -0.353015654    | 4.938953593        | -2.929927425 | 0.004462194 | 0.020246534      | -3.210721511 |
| ELMOD2    | -0.367514319    | 4.398708077        | -2.929238113 | 0.004471091 | 0.020280794      | -3.15942696  |
| ATP5F1    | 0.090685191     | 6.345903187        | 2.928461789  | 0.004481131 | 0.020320214      | -3.247079947 |
| NKRF      | -0.199623424    | 3.010242763        | -2.92793352  | 0.004487974 | 0.020345123      | -2.980550529 |
| G3BP1     | -0.190521781    | 7.633784607        | -2.927554607 | 0.004492889 | 0.020361275      | -3.214958278 |
| DCBLD1    | -0.153494803    | 3.310697961        | -2.927208079 | 0.004497388 | 0.020375534      | -3.036013369 |
| MERTK     | 0.580396005     | -1.703056415       | 2.926108804  | 0.004511687 | 0.020428031      | -2.219109915 |
| BTF3      | 0.170517954     | 8.823500493        | 2.926127493  | 0.004511444 | 0.020428031      | -3.164805086 |
| NDUFAF3   | 0.208111744     | 5.34076011         | 2.925424802  | 0.004520606 | 0.020462263      | -3.226350171 |
| IMPG2     | -1.063047151    | -3.806124442       | -2.924822339 | 0.004528475 | 0.020479421      | -2.071899719 |
| FAM86EP   | -0.216382246    | 1.167811093        | -2.924987474 | 0.004526317 | 0.020479421      | -2.625640797 |
| CYB5B     | 0.10619266      | 6.31030687         | 2.924851077  | 0.0045281   | 0.020479421      | -3.256599644 |
| RHBDD2    | 0.132388082     | 5.932854676        | 2.924564792  | 0.004531843 | 0.0204885        | -3.252533609 |
| GPR1      | -0.279915027    | 4.476630301        | -2.924396012 | 0.004534051 | 0.020492334      | -3.165721219 |
| ZNF555    | -0.172017266    | 2.23977075         | -2.923913968 | 0.004540364 | 0.020514709      | -2.902841497 |
| WDFY3-AS2 | -0.157304088    | 3.416083068        | -2.923207311 | 0.004549632 | 0.020538106      | -3.035714124 |
| FSTL3     | 0.262125358     | 3.656414614        | 2.923271863  | 0.004548785 | 0.020538106      | -3.066755201 |
| DIS3      | -0.160139449    | 5.900230872        | -2.923230117 | 0.004549333 | 0.020538106      | -3.254462962 |
| STK19     | 0.154249835     | 2.9072418          | 2.922676048  | 0.004556612 | 0.020563451      | -2.977608339 |
| EIF2AK1   | 0.091519804     | 6.725602059        | 2.922213595  | 0.004562695 | 0.020584739      | -3.262127489 |
| LDHA      | 0.090218009     | 9.37778389         | 2.922082491  | 0.004564421 | 0.02058636       | -3.133188477 |
| TMCC3     | -0.510765807    | -0.551564232       | -2.921794865 | 0.00456821  | 0.020597282      | -2.410881602 |
| ZNF813    | -0.309098831    | 1.603538229        | -2.921200093 | 0.004576054 | 0.020614139      | -2.794894842 |
| NIT2      | 0.155799331     | 4.431776026        | 2.921280191  | 0.004574997 | 0.020614139      | -3.172033328 |
| SNX3      | 0.10399441      | 7.966557562        | 2.92137999   | 0.00457368  | 0.020614139      | -3.223268886 |
| LEF1      | 0.714336104     | -1.962263569       | 2.920702935  | 0.00458262  | 0.020637547      | -2.221833314 |
| RNH1      | 0.156757571     | 9.060639546        | 2.91960549   | 0.004597146 | 0.020696773      | -3.16754799  |
| ERCC3     | 0.105843229     | 4.696984115        | 2.917646585  | 0.004623179 | 0.020807757      | -3.193385532 |
| TXNDC2    | 0.725500992     | -2.698853085       | 2.916757999  | 0.004635032 | 0.020854876      | -2.153259945 |
| POMGNT2   | 0.113336575     | 4.595536218        | 2.916634918  | 0.004636676 | 0.020856044      | -3.195285402 |
| PSMD13    | 0.148592351     | 6.62059653         | 2.915897285  | 0.004646541 | 0.020894177      | -3.27948732  |
| CCDC170   | -0.320121476    | 0.952401718        | -2.915407628 | 0.0046531   | 0.020917426      | -2.624193055 |
| DMXL2     | -0.417305021    | 2.666867166        | -2.915107567 | 0.004657123 | 0.020923026      | -2.938770543 |
| C19orf70  | 0.228894154     | 4.980700247        | 2.915190648  | 0.004656009 | 0.020923026      | -3.230446196 |
| CELF1     | -0.161681381    | 5.049632998        | -2.914911419 | 0.004659755 | 0.020928609      | -3.240370841 |
| VPS13B    | -0.372171108    | 5.431807747        | -2.914546878 | 0.00466465  | 0.020944349      | -3.267405833 |
| RCN1      | 0.073622383     | 8.296496259        | 2.913072906  | 0.004684491 | 0.021027168      | -3.223637953 |
| PNPLA2    | 0.177427876     | 5.713519845        | 2.912787944  | 0.004688336 | 0.021038157      | -3.273762461 |
| ST7-AS1   | -0.613476432    | -1.282096205       | -2.912461131 | 0.004692749 | 0.021051689      | -2.197975688 |
| C11orf68  | -0.115416543    | 6.153473379        | -2.912329471 | 0.004694528 | 0.0210534        | -3.288247364 |



| Gene       | Log fold change | Average Expression | t            | P-value     | Adjusted P-value | B            |
|------------|-----------------|--------------------|--------------|-------------|------------------|--------------|
| ATP11B     | -0.233730882    | 5.811238478        | -2.910894069 | 0.004713963 | 0.021134267      | -3.28921807  |
| FAM185A    | 0.282251719     | 0.419941729        | 2.910725095  | 0.004716256 | 0.021138255      | -2.503234945 |
| CNOT6L     | -0.242321486    | 4.255809879        | -2.910175291 | 0.004723723 | 0.021165425      | -3.233111998 |
| ATL2       | -0.185019855    | 4.202463624        | -2.909403286 | 0.004734226 | 0.02120618       | -3.193618356 |
| ODF2       | 0.114387375     | 4.906544959        | 2.908861962  | 0.004741604 | 0.021232913      | -3.254745885 |
| HAUS1      | 0.185314601     | 4.14120394         | 2.908602088  | 0.004745149 | 0.021242476      | -3.166521045 |
| VGLL3      | -0.220780065    | 8.705675528        | -2.907589395 | 0.00475899  | 0.021298104      | -3.230082698 |
| DUSP14     | -0.199677131    | 6.059343135        | -2.906785351 | 0.004770005 | 0.021341061      | -3.294577605 |
| ADH1A      | -0.772084588    | -2.090475002       | -2.905988277 | 0.004780948 | 0.021377321      | -2.2083909   |
| PYCR1      | 0.150869074     | 5.722282244        | 2.906023897  | 0.004780458 | 0.021377321      | -3.293373518 |
| TYMP       | 0.178083036     | 4.571372209        | 2.905625857  | 0.004785931 | 0.021386906      | -3.224580573 |
| CDK2AP1    | 0.110455768     | 6.686936176        | 2.905628117  | 0.0047859   | 0.021386906      | -3.305471764 |
| PEX16      | 0.177182886     | 3.856514691        | 2.904892886  | 0.004796024 | 0.021425653      | -3.151646617 |
| AKAP13     | 0.295712198     | 6.256427256        | 2.904549979  | 0.004800752 | 0.021440418      | -3.309787119 |
| OSBPL1A    | -0.139769185    | 6.146241702        | -2.903572285 | 0.004814258 | 0.021491027      | -3.312076654 |
| PUM1       | -0.244091112    | 6.099072642        | -2.903523163 | 0.004814937 | 0.021491027      | -3.313019515 |
| AMMECR1    | -0.213504324    | 3.927771864        | -2.90337566  | 0.004816978 | 0.021493767      | -3.189907858 |
| RNFT1      | -0.136656112    | 2.307757228        | -2.902583835 | 0.004827948 | 0.021536335      | -2.920975409 |
| KCNK1      | 0.238761826     | 1.994933992        | 2.902126864  | 0.004834289 | 0.021558237      | -2.896095843 |
| NTNG1      | -0.207342681    | 4.683321521        | -2.901883669 | 0.004837666 | 0.021566915      | -3.247693699 |
| EIF3D      | 0.096454286     | 8.343652241        | 2.901351473  | 0.004845066 | 0.021593512      | -3.256207643 |
| FAM110A    | 0.232444245     | 1.758564553        | 2.899739835  | 0.004867537 | 0.021674423      | -2.835899377 |
| ASAP1      | -0.273468673    | 6.552989534        | -2.899807316 | 0.004866594 | 0.021674423      | -3.319744292 |
| RBBP7      | 0.096639718     | 6.399495608        | 2.899874498  | 0.004865655 | 0.021674423      | -3.322575005 |
| CEBPZOS    | -0.089582959    | 4.674417434        | -2.898840751 | 0.004880114 | 0.021724008      | -3.250862243 |
| SENP3      | 0.139097215     | 3.644186593        | 2.898234865  | 0.004888607 | 0.021755385      | -3.14534267  |
| UBLCP1     | -0.086534884    | 5.446547923        | -2.897632261 | 0.004897068 | 0.0217866        | -3.31334026  |
| GPN1       | 0.094984577     | 4.697416776        | 2.896963369  | 0.004906474 | 0.021815599      | -3.266017453 |
| SRPRB      | 0.098968534     | 6.229750362        | 2.896962816  | 0.004906482 | 0.021815599      | -3.330474953 |
| LETM2      | -0.255821981    | 0.504808091        | -2.896731855 | 0.004909734 | 0.021823616      | -2.630864768 |
| FNTA       | 0.149486776     | 4.87015007         | 2.896417069  | 0.00491417  | 0.021836888      | -3.274013419 |
| SON        | -0.397741494    | 7.625609719        | -2.895983546 | 0.004920284 | 0.021857611      | -3.295286884 |
| PPP1R2     | -0.130866588    | 5.165773092        | -2.895811255 | 0.004922716 | 0.021861968      | -3.303084435 |
| USP36      | -0.17295915     | 5.900659722        | -2.895372494 | 0.004928914 | 0.021883044      | -3.325158331 |
| SDC1       | 0.207424928     | 5.370480067        | 2.895079374  | 0.004933059 | 0.021894993      | -3.313562896 |
| MIER3      | -0.248310369    | 4.136575363        | -2.894885279 | 0.004935806 | 0.02190073       | -3.232202883 |
| PROKR1     | -0.166873554    | 2.010559965        | -2.894537837 | 0.004940725 | 0.021916104      | -2.853526776 |
| ZNF558     | -0.125076112    | 3.259449283        | -2.894184875 | 0.004945728 | 0.021931836      | -3.117442804 |
| FOCAD      | -0.157916053    | 5.334760988        | -2.893008404 | 0.004962436 | 0.021999451      | -3.313189789 |
| PIF1       | 0.349910999     | 0.638267223        | 2.892713404  | 0.004966633 | 0.022005108      | -2.6141066   |
| CCDC15     | 0.332161958     | 0.375727893        | 2.892740152  | 0.004966253 | 0.022005108      | -2.641706999 |
| KHSRP      | 0.075701197     | 7.868583538        | 2.892168009  | 0.004974403 | 0.02203305       | -3.301209171 |
| PRPF3      | 0.122823532     | 4.518464293        | 2.891905159  | 0.004978151 | 0.022043171      | -3.272977986 |
| ZNF334     | 0.326284221     | 0.726150413        | 2.891309543  | 0.004986654 | 0.022074335      | -2.66540724  |
| TTC27      | -0.103895457    | 3.921013615        | -2.890969159 | 0.00499152  | 0.022083982      | -3.199733489 |
| ERCC1      | 0.159130643     | 6.160546629        | 2.890951964  | 0.004991766 | 0.022083982      | -3.34439163  |
| PEX12      | 0.149475917     | 3.17643657         | 2.890714881  | 0.004995157 | 0.022085527      | -3.149854346 |
| ZNF134     | -0.149303144    | 4.346256079        | -2.890517725 | 0.004997979 | 0.022085527      | -3.247676935 |
| USP38      | -0.199923658    | 4.825458031        | -2.890566401 | 0.004997283 | 0.022085527      | -3.290039721 |
| ECHS1      | 0.179483305     | 6.240628215        | 2.890610337  | 0.004996654 | 0.022085527      | -3.345487805 |
| MROH6      | 0.247497474     | 2.608380162        | 2.890369516  | 0.005000102 | 0.022088427      | -2.966796745 |
| C3orf80    | -0.462180692    | 0.13575132         | -2.890005206 | 0.005005323 | 0.022105007      | -2.572793902 |
| RIOX2      | -0.10660656     | 4.168157167        | -2.889902772 | 0.005006791 | 0.022105013      | -3.222834599 |
| SLC12A6    | -0.262510343    | 4.809504904        | -2.88929484  | 0.005015517 | 0.022130563      | -3.279610837 |
| STK4       | -0.194419741    | 4.612949241        | -2.889390526 | 0.005014142 | 0.022130563      | -3.284228721 |
| RCC1L      | 0.112558327     | 5.631202416        | 2.888772727  | 0.005023021 | 0.022157187      | -3.340077858 |
| MBNL1-AS1  | -0.143348954    | 2.690370695        | -2.888095618 | 0.00503277  | 0.022186557      | -3.036184964 |
| NFAT5      | -0.369036607    | 4.764752784        | -2.88808144  | 0.005032974 | 0.022186557      | -3.301523162 |
| NR2C2      | -0.345070097    | 4.905265936        | -2.887926491 | 0.005035207 | 0.022186557      | -3.315064261 |
| PHLDA1     | 0.289723421     | 5.933007737        | 2.887901256  | 0.005035571 | 0.022186557      | -3.347795942 |
| TGFBR3L    | 0.545547192     | -1.317975754       | 2.887223439  | 0.005045352 | 0.022223151      | -2.329657337 |
| ATP2B1-AS1 | -0.235611806    | 1.248914542        | -2.887109162 | 0.005047002 | 0.022223924      | -2.775304623 |
| N4BP2L2    | -0.115967649    | 4.854686877        | -2.886913932 | 0.005049824 | 0.022229849      | -3.288672441 |
| GAPDH      | 0.161935925     | 10.43978028        | 2.886466641  | 0.005056293 | 0.022245325      | -3.171151894 |
| ZNF84      | -0.143899968    | 4.125316642        | -2.886563456 | 0.005054892 | 0.022245325      | -3.248137698 |
| ZNF540     | 0.315532275     | -0.293585751       | 2.885891674  | 0.00506462  | 0.022275455      | -2.598793744 |
| GPR162     | -0.298331885    | 1.585861495        | -2.885044101 | 0.005076918 | 0.022323027      | -2.747667051 |
| ICE1       | -0.237561917    | 5.573652395        | -2.884679952 | 0.00508221  | 0.022339776      | -3.353565973 |
| ATP13A2    | 0.154043942     | 4.036931067        | 2.88447491   | 0.005085192 | 0.022346363      | -3.264713684 |
| SLC39A11   | -0.103382774    | 3.810860505        | -2.884180602 | 0.005089475 | 0.022356653      | -3.198643372 |

| Gene       | Log fold change | Average Expression | t            | P-value     | Adjusted P-value | B            |
|------------|-----------------|--------------------|--------------|-------------|------------------|--------------|
| TTPAL      | -0.17417216     | 4.831675496        | -2.88400819  | 0.005091986 | 0.022356653      | -3.318431705 |
| EIF3M      | 0.102436413     | 7.275374653        | 2.8840977    | 0.005090682 | 0.022356653      | -3.347740151 |
| WDR78      | -0.196838478    | 1.516422753        | -2.883635246 | 0.005097421 | 0.022373994      | -2.773303808 |
| IL17RA     | -0.161663435    | 5.362533683        | -2.881332101 | 0.005131103 | 0.022508717      | -3.349601162 |
| DDX41      | 0.092321955     | 5.643280065        | 2.881381053  | 0.005130385 | 0.022508717      | -3.358360698 |
| SETD5      | -0.223410896    | 5.509727411        | -2.880988779 | 0.005136141 | 0.02252426       | -3.362687707 |
| COX19      | 0.29653161      | 1.794097413        | 2.880640279  | 0.00514126  | 0.022527035      | -2.946240866 |
| OFD1       | -0.139940889    | 3.738678204        | -2.880785455 | 0.005139127 | 0.022527035      | -3.193189808 |
| SDCCAG3    | 0.132680269     | 4.696351761        | 2.880692279  | 0.005140496 | 0.022527035      | -3.288967103 |
| NUMA1      | 0.101236841     | 7.466547827        | 2.879976827  | 0.005151019 | 0.022563229      | -3.357498995 |
| ATF4       | 0.181635934     | 7.770699085        | 2.878942974  | 0.005166259 | 0.022622732      | -3.350273287 |
| TMEM167A   | -0.134329501    | 6.753730493        | -2.878851714 | 0.005167606 | 0.022622732      | -3.374723469 |
| AMOTL2     | 0.524905895     | 6.437816275        | 2.878077599  | 0.005179048 | 0.022666233      | -3.354110724 |
| PRRC1      | -0.23251211     | 6.584779433        | -2.877808496 | 0.00518303  | 0.022677075      | -3.377885372 |
| MDFI       | 0.6162182       | -1.067412876       | 2.877308955  | 0.005190431 | 0.022702862      | -2.409543684 |
| ETS2       | 0.231225812     | 4.99814084         | 2.876536312  | 0.005201897 | 0.022746409      | -3.311224288 |
| MTHFR      | -0.221769724    | 4.93323832         | -2.876059988 | 0.005208978 | 0.02277076       | -3.362784252 |
| FAM84A     | -0.371569916    | 1.890130797        | -2.875566615 | 0.005216321 | 0.022796244      | -2.901102108 |
| DIP2C      | -0.225183219    | 5.445180597        | -2.874908009 | 0.005226138 | 0.022832523      | -3.352886628 |
| FHOD3      | -0.180660956    | 3.765445685        | -2.874663411 | 0.005229788 | 0.022841846      | -3.201954288 |
| DDSTYK     | -0.251879279    | 5.349707729        | -2.874128297 | 0.005237782 | 0.02287013       | -3.375475803 |
| LPP-AS2    | -0.180600146    | 1.913592699        | -2.873622684 | 0.005245346 | 0.022895295      | -2.932662819 |
| PATZ1      | -0.092090576    | 4.269901727        | -2.873539904 | 0.005246585 | 0.022895295      | -3.29615035  |
| RIPOR3     | 0.22565984      | 3.815470904        | 2.872851548  | 0.005256901 | 0.022927028      | -3.185255813 |
| SESTD1     | -0.136805276    | 5.870253667        | -2.872930819 | 0.005255712 | 0.022927028      | -3.385956113 |
| ENTPD3-AS1 | -0.353036118    | 0.144587824        | -2.872671583 | 0.005259601 | 0.022932165      | -2.560107047 |
| ERCC6L     | -0.379549664    | 0.655590292        | -2.872525203 | 0.005261798 | 0.022935106      | -2.690186393 |
| TMEM91     | 0.277738245     | 1.146389799        | 2.871120928  | 0.005282919 | 0.023020506      | -2.776237024 |
| GRAMD1A    | 0.137502169     | 5.456938896        | 2.870534434  | 0.005291763 | 0.023052377      | -3.373837187 |
| ARHGEF2    | -0.199208697    | 6.47624324         | -2.869865858 | 0.005301862 | 0.023089692      | -3.39828513  |
| VDAC2      | 0.122554682     | 4.693772039        | 2.868668729  | 0.005319988 | 0.023155245      | -3.336013415 |
| RTL6       | -0.200516596    | 6.29816355         | -2.868744304 | 0.005318842 | 0.023155245      | -3.404259983 |
| PSEN2      | -0.151193585    | 4.212161039        | -2.868535146 | 0.005322014 | 0.023157373      | -3.27922198  |
| ATG5       | 0.08472397      | 4.81530257         | 2.867552408  | 0.005336942 | 0.023215623      | -3.343160711 |
| RIPK1      | 0.182950423     | 5.697796634        | 2.867105185  | 0.005343749 | 0.023238519      | -3.398000816 |
| SLC25A39   | 0.160871539     | 6.381535485        | 2.866859619  | 0.005347489 | 0.023248075      | -3.408999418 |
| SOCS2      | 0.234662057     | 3.663194408        | 2.866419137  | 0.005354205 | 0.023270556      | -3.200141222 |
| CEP85L     | 0.203612968     | 3.077160616        | 2.865721243  | 0.005364861 | 0.023310145      | -3.176628725 |
| CNKSR2     | -0.362824613    | 0.912245861        | -2.865618758 | 0.005366428 | 0.023310228      | -2.751756588 |
| MRGPRE     | 0.62337448      | -2.119420587       | 2.865195028  | 0.005372909 | 0.023325885      | -2.336510068 |
| PANK3      | -0.218958082    | 5.811925513        | -2.865180641 | 0.005373129 | 0.023325885      | -3.408005848 |
| MORN1      | -0.248929171    | 1.503572648        | -2.864787679 | 0.005379147 | 0.023331836      | -2.819671422 |
| S100A11    | 0.208864655     | 8.851937739        | 2.864857739  | 0.005378073 | 0.023331836      | -3.325742129 |
| RBM26      | 0.096990198     | 4.777061123        | 2.864791817  | 0.005379083 | 0.023331836      | -3.362404024 |
| TXN        | 0.196250298     | 7.37124409         | 2.864348629  | 0.005385877 | 0.023354304      | -3.398504077 |
| CAMK1D     | -0.250389748    | 4.313738754        | -2.864222802 | 0.005387807 | 0.023355951      | -3.301019002 |
| TMEM147    | 0.169612585     | 6.265085951        | 2.863853051  | 0.005393483 | 0.02337383       | -3.416175431 |
| ARL1       | 0.062905649     | 6.941014357        | 2.863563714  | 0.005397929 | 0.023386367      | -3.409416199 |
| SSH2       | -0.283480861    | 3.92427788         | -2.86308563  | 0.005405281 | 0.02340476       | -3.322471721 |
| MRPL4      | 0.175682069     | 4.638527687        | 2.863160495  | 0.005404129 | 0.02340476       | -3.343207058 |
| ERH        | 0.150084326     | 5.70302957         | 2.862364847  | 0.005416384 | 0.023446095      | -3.411339343 |
| AIFM1      | 0.123141449     | 4.798807638        | 2.861865994  | 0.005424081 | 0.023472666      | -3.357702288 |
| TDO2       | -0.66403635     | -1.339990106       | -2.861654974 | 0.005427339 | 0.023472987      | -2.349451401 |
| NAA20      | 0.158221135     | 5.115102506        | 2.861756739  | 0.005425768 | 0.023472987      | -3.390699644 |
| TRIM22     | 0.091740746     | 6.847950027        | 2.861457685  | 0.005430388 | 0.023472987      | -3.417445569 |
| GOLGA5     | 0.076541543     | 6.028088836        | 2.861531263  | 0.005429251 | 0.023472987      | -3.420947525 |
| KIAA1147   | -0.199296223    | 2.790028244        | -2.861118995 | 0.005435624 | 0.023488883      | -3.121410467 |
| TNPO3      | 0.077544517     | 5.984627984        | 2.860035222  | 0.005452413 | 0.023554673      | -3.422883981 |
| XRCC4      | -0.163363547    | 2.219044321        | -2.859500256 | 0.005460717 | 0.023577026      | -3.006323299 |
| CRABP2     | 0.235272386     | 7.29646842         | 2.859570696  | 0.005459623 | 0.023577026      | -3.413226012 |
| TCF19      | -0.20476952     | 3.726010138        | -2.858908074 | 0.005469923 | 0.023610008      | -3.251352853 |
| HEATR3     | -0.18687331     | 3.43733902         | -2.858639929 | 0.005474097 | 0.023620311      | -3.248497112 |
| CDC42EP5   | 0.220546547     | 5.141516244        | 2.858553247  | 0.005475447 | 0.023620311      | -3.389010933 |
| METTTL2A   | -0.121504068    | 3.05540141         | -2.858452565 | 0.005477015 | 0.023620312      | -3.167330799 |
| TMEM44     | 0.17915051      | 3.784954949        | 2.857735851  | 0.005488189 | 0.02366173       | -3.253645025 |
| ZFP36L1    | -0.214733803    | 8.824299119        | -2.856363143 | 0.005509651 | 0.023747462      | -3.346381651 |
| EPHA2      | 0.340069981     | 3.036133609        | 2.85618829   | 0.00551239  | 0.023752472      | -3.11158147  |
| TRAPPC10   | -0.287620567    | 3.980474417        | -2.855143165 | 0.005528789 | 0.023809514      | -3.324927101 |
| HARS       | 0.138333531     | 6.17949831         | 2.855219267  | 0.005527593 | 0.023809514      | -3.438215816 |
| SSBP1      | 0.137126763     | 5.760696793        | 2.854931753  | 0.005532112 | 0.023817014      | -3.430991117 |

| Gene         | Log fold change | Average Expression | t            | P-value     | Adjusted P-value | B            |
|--------------|-----------------|--------------------|--------------|-------------|------------------|--------------|
| VPS18        | -0.11436733     | 6.276373165        | -2.85460935  | 0.005537183 | 0.023832034      | -3.440338544 |
| NIPA1        | -0.205336829    | 3.143569113        | -2.854346259 | 0.005541324 | 0.023843044      | -3.220625507 |
| SH3GL1       | 0.15291681      | 7.603290905        | 2.853730354  | 0.005551029 | 0.023877984      | -3.415372452 |
| TMEM259      | 0.110256988     | 5.722453887        | 2.852908356  | 0.005564006 | 0.023926974      | -3.432920787 |
| CHCHD10      | 0.250576044     | 3.14746856         | 2.85198724   | 0.005578582 | 0.023982806      | -3.183866155 |
| ABCB6        | 0.30447578      | 0.952966416        | 2.851655969  | 0.005583832 | 0.023984843      | -2.760545472 |
| AIFM2        | -0.125934952    | 4.673544803        | -2.851662743 | 0.005583725 | 0.023984843      | -3.373772534 |
| SMS          | 0.152241247     | 4.975190031        | 2.851771484  | 0.005582001 | 0.023984843      | -3.396044118 |
| SLC7A2       | -0.560813437    | 0.106953881        | -2.851347632 | 0.005588723 | 0.02399217       | -2.642735565 |
| SCAF11       | -0.268397496    | 6.16565328         | -2.851418082 | 0.005587605 | 0.02399217       | -3.449189602 |
| UNG          | -0.117208563    | 5.244097847        | -2.850937982 | 0.005595227 | 0.024013249      | -3.420640821 |
| BMPR2        | -0.245318442    | 6.952287229        | -2.850366633 | 0.005604311 | 0.024045382      | -3.443875285 |
| TMEM218      | -0.142507358    | 3.409886254        | -2.849629969 | 0.005616042 | 0.024088855      | -3.198161134 |
| SLC25A21-AS1 | 0.836417617     | -2.715134087       | 2.8482736    | 0.005637701 | 0.024154248      | -2.332598277 |
| UPRT         | 0.119677399     | 2.958363393        | 2.848366004  | 0.005636223 | 0.024154248      | -3.171498766 |
| UBOX5        | -0.145206332    | 3.005105491        | -2.848501783 | 0.005634052 | 0.024154248      | -3.214461915 |
| FAM96B       | 0.193705061     | 4.921856601        | 2.848335138  | 0.005636717 | 0.024154248      | -3.402125013 |
| ANKRD31      | 0.926829841     | -3.111475376       | 2.847456481  | 0.005650787 | 0.024195177      | -2.274712598 |
| SREK1IP1     | -0.125348939    | 4.292814023        | -2.847376252 | 0.005652073 | 0.024195177      | -3.354930814 |
| OXR1         | -0.163805074    | 4.942810817        | -2.847535151 | 0.005649526 | 0.024195177      | -3.408370272 |
| MT2A         | 0.206537051     | 7.278274126        | 2.847144447  | 0.005655791 | 0.024204215      | -3.445531767 |
| ETFDH        | -0.104721874    | 4.081484844        | -2.846606249 | 0.005664432 | 0.02423431       | -3.32980137  |
| C2orf16      | -0.315422525    | 0.618952352        | -2.846403459 | 0.005667691 | 0.024235696      | -2.734229895 |
| CAPNS1       | 0.174775536     | 8.841498896        | 2.846385883  | 0.005667974 | 0.024235696      | -3.37529268  |
| SRRD         | -0.101834823    | 3.653666443        | -2.846039004 | 0.005673553 | 0.024246984      | -3.305191267 |
| TBC1D15      | -0.139294348    | 5.440811118        | -2.846021582 | 0.005673833 | 0.024246984      | -3.445284063 |
| ADAM15       | 0.111624343     | 6.794138426        | 2.845806     | 0.005677303 | 0.024254932      | -3.4609393   |
| MFN1         | -0.176127665    | 4.520996319        | -2.845693691 | 0.005679111 | 0.024255779      | -3.39275945  |
| IER2         | 0.325686115     | 4.53734825         | 2.845442097  | 0.005683165 | 0.024266211      | -3.320915308 |
| MYO3B        | -0.51663414     | -0.451701148       | -2.843779629 | 0.005710014 | 0.024373946      | -2.557016392 |
| KIFC2        | 0.200626016     | 1.611897978        | 2.842741631  | 0.005726838 | 0.024438834      | -2.952381139 |
| FAAP20       | 0.196946149     | 5.326379448        | 2.841866178  | 0.005741062 | 0.024492596      | -3.444677304 |
| BID          | 0.180728278     | 4.026561563        | 2.841159779  | 0.005752563 | 0.024534715      | -3.355202648 |
| RPS19        | 0.216462166     | 10.24515926        | 2.840934706  | 0.005756232 | 0.024543084      | -3.304447306 |
| GNB4         | -0.283628352    | 5.500905296        | -2.840839541 | 0.005757784 | 0.024543084      | -3.467959996 |
| PANK4        | 0.118079158     | 3.655700487        | 2.840255034  | 0.005767325 | 0.024576797      | -3.309219251 |
| NUDT22       | 0.116710301     | 3.867987636        | 2.840129412  | 0.005769377 | 0.02457859       | -3.323452618 |
| PPOX         | -0.233353007    | 2.30898531         | -2.839687392 | 0.005776604 | 0.024600264      | -3.029933632 |
| PFDN6        | 0.245619817     | 3.834962844        | 2.839618524  | 0.005777731 | 0.024600264      | -3.310157639 |
| RGS7         | -0.510488523    | 0.019011368        | -2.839440361 | 0.005780646 | 0.024605724      | -2.592936912 |
| GTF2H2C      | 0.339507659     | 0.190803927        | 2.838314933  | 0.005799096 | 0.024675414      | -2.666631307 |
| IFITM1       | 0.192712332     | 5.584891936        | 2.838241928  | 0.005800295 | 0.024675414      | -3.465701942 |
| LOC93622     | 0.199735456     | 2.769980272        | 2.838097086  | 0.005802674 | 0.024678565      | -3.182295796 |
| RAPH1        | -0.845003937    | 2.601282191        | -2.837824505 | 0.005807153 | 0.024684369      | -2.996564321 |
| DNAJB14      | -0.301344746    | 4.701364579        | -2.8378146   | 0.005807316 | 0.024684369      | -3.435881779 |
| IDI1         | -0.24346872     | 6.579023238        | -2.837617672 | 0.005810554 | 0.024691166      | -3.478327275 |
| TP53BP2      | -0.156434947    | 4.943234056        | -2.837465036 | 0.005813065 | 0.02469487       | -3.427068994 |
| NEK6         | -0.184497647    | 6.443261634        | -2.836645112 | 0.00582657  | 0.024737627      | -3.486911127 |
| GSK3B        | -0.174717361    | 6.256663097        | -2.836601555 | 0.005827288 | 0.024737627      | -3.487056671 |
| ABCE1        | -0.109739749    | 6.066220783        | -2.836555003 | 0.005828056 | 0.024737627      | -3.488213733 |
| KITLG        | -0.249985291    | 6.688324879        | -2.836454148 | 0.00582972  | 0.024737718      | -3.486522595 |
| ENG          | 0.159534763     | 8.266123938        | 2.836000059  | 0.005837215 | 0.024762549      | -3.429249308 |
| CAB39        | -0.173999217    | 6.069025499        | -2.833860458 | 0.005872653 | 0.024905869      | -3.49462406  |
| AGAP1        | -0.123167618    | 5.089503073        | -2.833610354 | 0.005876808 | 0.024916476      | -3.450040468 |
| CAMKMT       | -0.275103791    | 1.58657358         | -2.833383472 | 0.00588058  | 0.024925453      | -2.916640865 |
| DDX39A       | 0.176535165     | 5.048583919        | 2.832836518  | 0.005889682 | 0.02495701       | -3.467686428 |
| COL9A3       | -0.819051331    | -2.495732972       | -2.832340815 | 0.005897942 | 0.024984985      | -2.350105433 |
| PRKACA       | 0.104050223     | 6.882452079        | 2.831161763  | 0.005917633 | 0.02506135       | -3.497816122 |
| NOX4         | -0.428637313    | 0.957379716        | -2.830863234 | 0.005922628 | 0.025070544      | -2.791450085 |
| TADA2B       | -0.112037652    | 4.859989616        | -2.830833099 | 0.005923132 | 0.025070544      | -3.447893267 |
| EXOC5        | -0.177298583    | 5.915082213        | -2.83064465  | 0.005926288 | 0.025076853      | -3.498882803 |
| PSMA1        | 0.171615956     | 4.094487126        | 2.829931634  | 0.00593824  | 0.025120375      | -3.38302558  |
| SDHAF1       | 0.155896406     | 2.887721719        | 2.829264929  | 0.005949437 | 0.025160673      | -3.239092494 |
| BCAP31       | 0.109319922     | 7.036365919        | 2.828131893  | 0.005968509 | 0.025234248      | -3.502696078 |
| CHCHD3       | -0.082076193    | 5.136820208        | -2.827753324 | 0.005974894 | 0.025254155      | -3.47089871  |
| HMGN1        | 0.114748836     | 5.38469997         | 2.82752866   | 0.005978687 | 0.025263095      | -3.488328314 |
| PYCARD       | 0.270059342     | 3.415327133        | 2.825858061  | 0.006006954 | 0.025375424      | -3.293501119 |
| SIX1         | -0.279542322    | 3.822617765        | -2.82524665  | 0.006017331 | 0.02541213       | -3.390960659 |
| TJAP1        | 0.110522086     | 4.288261181        | 2.82481361   | 0.00602469  | 0.025436078      | -3.417945226 |
| TAF10        | 0.20433896      | 5.883407703        | 2.824706335  | 0.006026514 | 0.025436651      | -3.510685784 |

| Gene         | Log fold change | Average Expression | t            | P-value     | Adjusted P-value | B            |
|--------------|-----------------|--------------------|--------------|-------------|------------------|--------------|
| USP42        | -0.16893963     | 3.788652755        | -2.824013969 | 0.006038301 | 0.025464976      | -3.368990631 |
| RSBN1L       | -0.196725467    | 3.75563            | -2.82409748  | 0.006036878 | 0.025464976      | -3.399847408 |
| RPRD1A       | -0.153181046    | 4.774367815        | -2.82401     | 0.006038368 | 0.025464976      | -3.458425141 |
| MRPL10       | 0.114934905     | 5.599940968        | 2.823815852  | 0.006041677 | 0.025464976      | -3.506171003 |
| SIK2         | -0.246973231    | 5.742859194        | -2.823908112 | 0.006040104 | 0.025464976      | -3.51578205  |
| NOP16        | -0.239349846    | 3.354261287        | -2.822446168 | 0.006065068 | 0.025556416      | -3.341622844 |
| SLC35E2B     | -0.304260432    | 5.131864479        | -2.821120047 | 0.006087795 | 0.025645006      | -3.484055873 |
| UBALD2       | 0.25624432      | 3.832810347        | 2.820893808  | 0.00609168  | 0.025654197      | -3.349160892 |
| SLC35F2      | -0.242772987    | 3.556395561        | -2.820324802 | 0.006101461 | 0.025688207      | -3.345651614 |
| CYB5R4       | -0.138560288    | 4.086529414        | -2.819753096 | 0.006111303 | 0.025715269      | -3.402453014 |
| PPIB         | 0.165079304     | 8.083671446        | 2.8197642    | 0.006111111 | 0.025715269      | -3.48278595  |
| LOC101929066 | 0.696164699     | -2.104518617       | 2.819613129  | 0.006113715 | 0.025718234      | -2.407908015 |
| RNF170       | -0.234097315    | 4.07287573         | -2.819206057 | 0.006120734 | 0.025740573      | -3.400074803 |
| ARID1A       | -0.276350046    | 5.638625079        | -2.81850055  | 0.006132916 | 0.025777987      | -3.526116818 |
| SRI          | 0.112483941     | 5.733420806        | 2.81849267   | 0.006133053 | 0.025777987      | -3.526233992 |
| LSM3         | 0.118484814     | 5.013581439        | 2.818149702  | 0.006138983 | 0.025792841      | -3.491136283 |
| PDLIM4       | 0.197486504     | 5.831899888        | 2.818090282  | 0.006140011 | 0.025792841      | -3.53112384  |
| MRPS31       | 0.212604459     | 3.071299946        | 2.817886819  | 0.006143532 | 0.025800439      | -3.249217183 |
| KCTD15       | -0.156885359    | 5.134996637        | -2.816497655 | 0.006167624 | 0.025894394      | -3.504790506 |
| ZNF689       | -0.121328619    | 3.648618044        | -2.81567203  | 0.006181983 | 0.025937498      | -3.392019078 |
| COPS4        | 0.064590837     | 5.587945508        | 2.815610429  | 0.006183056 | 0.025937498      | -3.531096353 |
| ATP5G2       | 0.175535332     | 7.203107952        | 2.815789199  | 0.006179944 | 0.025937498      | -3.532659513 |
| SFXN5        | 0.12067618      | 3.533403252        | 2.81337415   | 0.00622211  | 0.026086798      | -3.371231981 |
| C3orf38      | -0.12163318     | 4.664330641        | -2.813437222 | 0.006221005 | 0.026086798      | -3.47708847  |
| HSPB6        | 0.288081471     | 7.674919531        | 2.81311851   | 0.006226589 | 0.026098313      | -3.5241602   |
| VSTM4        | -0.243292571    | 7.094897495        | -2.812709369 | 0.006233763 | 0.026121116      | -3.5400619   |
| MACROD2      | -0.294129113    | 0.947053842        | -2.81246775  | 0.006238004 | 0.026131615      | -2.93184321  |
| AMY2B        | 0.770125531     | -2.691175561       | 2.812310506  | 0.006240765 | 0.026135913      | -2.428831445 |
| TIMM8B       | 0.193394919     | 3.874235516        | 2.811948436  | 0.006247127 | 0.026155285      | -3.402288109 |
| IL1RAP       | -0.281609212    | 4.009022428        | -2.811651827 | 0.006252343 | 0.02616985       | -3.441679841 |
| BET1L        | 0.098152406     | 5.874189111        | 2.811433857  | 0.006256178 | 0.026178631      | -3.548858818 |
| ZNF763       | 0.538028899     | -1.848791333       | 2.810718954  | 0.006268774 | 0.026212016      | -2.549091657 |
| CHAF1A       | -0.157121741    | 3.247205117        | -2.810684776 | 0.006269377 | 0.026212016      | -3.308323099 |
| DRG2         | 0.09877506      | 4.643740385        | 2.810740716  | 0.00626839  | 0.026212016      | -3.48007804  |
| PPP1R7       | 0.154595345     | 6.258035399        | 2.809750224  | 0.006285879 | 0.026273718      | -3.556190353 |
| PTPMT1       | 0.162587124     | 2.592626041        | 2.809091593  | 0.006297533 | 0.026307542      | -3.217838458 |
| ANKS6        | -0.13352258     | 4.995605902        | -2.808996884 | 0.00629921  | 0.026307542      | -3.519341058 |
| SSFA2        | -0.34760013     | 5.489776292        | -2.809079973 | 0.006297739 | 0.026307542      | -3.541211325 |
| PALM         | 0.205729564     | 6.405529363        | 2.808802015  | 0.006302663 | 0.026314666      | -3.55301056  |
| NOSIP        | 0.195976188     | 5.267122378        | 2.808676697  | 0.006304884 | 0.026316647      | -3.526745557 |
| TSR3         | 0.20273968      | 5.418128291        | 2.808450972  | 0.006308887 | 0.02632606       | -3.534104195 |
| ENKD1        | 0.21874181      | 3.768302727        | 2.80770007   | 0.00632222  | 0.026368314      | -3.364927588 |
| AKR7A2       | 0.155172608     | 6.128587101        | 2.807683522  | 0.006322514 | 0.026368314      | -3.559783444 |
| ACTR8        | -0.123507058    | 4.781040357        | -2.807578637 | 0.006324378 | 0.02636879       | -3.514140392 |
| LDLR         | -0.287620611    | 7.938518811        | -2.807153651 | 0.006331938 | 0.026393004      | -3.526859208 |
| TRIM69       | -0.090177628    | 5.014696874        | -2.806521812 | 0.006343193 | 0.026432602      | -3.510660507 |
| DDX10        | 0.147085075     | 4.152316312        | 2.805277288  | 0.006365415 | 0.026517866      | -3.479642492 |
| MCRIP2       | 0.246545205     | 2.868635134        | 2.805068869  | 0.006369143 | 0.026522575      | -3.257640854 |
| ATF2         | -0.173211624    | 4.957529127        | -2.805017283 | 0.006370066 | 0.026522575      | -3.541468983 |
| PFKL         | 0.121144313     | 7.142088459        | 2.804043136  | 0.006387522 | 0.026587904      | -3.561900318 |
| EIF3F        | 0.121797619     | 7.790316461        | 2.803846276  | 0.006391054 | 0.02659526       | -3.538956884 |
| ZFP28        | -0.145847403    | 2.917647505        | -2.803685521 | 0.006393941 | 0.026599914      | -3.297152693 |
| MAEA         | 0.07169052      | 5.621563409        | 2.803587327  | 0.006395704 | 0.026599914      | -3.559144528 |
| ZNF106       | -0.181424712    | 7.481087086        | -2.803408994 | 0.006398908 | 0.026605893      | -3.551633747 |
| ORMDL2       | 0.167405839     | 2.872197102        | 2.802683549  | 0.006411957 | 0.026652792      | -3.274474887 |
| TSPY26P      | 0.161398303     | 2.697019713        | 2.802464678  | 0.006415899 | 0.02666182       | -3.29844107  |
| DEF6         | 0.722737562     | -1.998400111       | 2.801958447  | 0.006425024 | 0.026670962      | -2.46295202  |
| MIR29A       | -0.329013427    | 0.827839892        | -2.801949767 | 0.006425181 | 0.026670962      | -2.863819014 |
| KATNB1       | 0.128903451     | 3.941512189        | 2.802091375  | 0.006422627 | 0.026670962      | -3.418387295 |
| TUFM         | 0.143034281     | 7.17279622         | 2.802086025  | 0.006422723 | 0.026670962      | -3.566835508 |
| ELP4         | -0.1567712695   | 3.077515289        | -2.801427527 | 0.006434607 | 0.026697067      | -3.273789882 |
| RPS19BP1     | 0.199432972     | 5.131095065        | 2.801382085  | 0.006435428 | 0.026697067      | -3.53803109  |
| PXN          | -0.099076862    | 7.064224426        | -2.801306906 | 0.006436786 | 0.026697067      | -3.568093888 |
| MAT2B        | 0.083850839     | 5.557644376        | 2.799907967  | 0.006462108 | 0.026794714      | -3.571449053 |
| SDCCAG8      | -0.109758844    | 4.288020671        | -2.799369414 | 0.006471881 | 0.026827851      | -3.446522835 |
| TMEM88       | 0.940940611     | -3.269148091       | 2.798774593  | 0.00648269  | 0.026865266      | -2.373646813 |
| PCNX1        | -0.332400511    | 6.076003003        | -2.798533686 | 0.006487072 | 0.026876034      | -3.583684906 |
| PGAP1        | -0.289305322    | 4.067193341        | -2.798152897 | 0.006494005 | 0.026897359      | -3.472721294 |
| MRPL20       | 0.134039101     | 5.093474331        | 2.797993533  | 0.006496909 | 0.026901988      | -3.551495595 |
| IFT172       | -0.106278548    | 4.487125798        | -2.796095853 | 0.006531574 | 0.027038097      | -3.489404868 |

| Gene         | Log fold change | Average Expression | t            | P-value     | Adjusted P-value | B            |
|--------------|-----------------|--------------------|--------------|-------------|------------------|--------------|
| ZNF277       | 0.100906555     | 5.172078645        | 2.795790576  | 0.006537167 | 0.027053813      | -3.555183136 |
| RRAGB        | -0.090944297    | 4.177897338        | -2.795312229 | 0.006545939 | 0.027082675      | -3.482446083 |
| MYCBP2       | -0.301407657    | 6.513224095        | -2.79496534  | 0.006552306 | 0.027098114      | -3.593903981 |
| SRRT         | 0.11723174      | 6.235927944        | 2.794912981  | 0.006553268 | 0.027098114      | -3.595052377 |
| STEAP2       | -0.21056755     | 3.691509044        | -2.794357963 | 0.00656347  | 0.027132283      | -3.420297568 |
| HIGD2A       | 0.204550037     | 5.300951801        | 2.794267521  | 0.006565134 | 0.027132283      | -3.564347237 |
| PRPF31       | 0.160016715     | 4.764164944        | 2.794163865  | 0.006567041 | 0.027132722      | -3.533635883 |
| CLDN12       | -0.213996608    | 3.903166571        | -2.793853916 | 0.006572747 | 0.027148852      | -3.433231627 |
| GTF3C5       | 0.117302427     | 5.239322757        | 2.793187751  | 0.006585027 | 0.027192118      | -3.563090183 |
| HABP4        | 0.113586518     | 5.437903198        | 2.792921522  | 0.00658994  | 0.02720495       | -3.587508454 |
| SNU13        | 0.132849311     | 6.548085555        | 2.792405789  | 0.006599468 | 0.027236819      | -3.601419444 |
| CASP9        | -0.157720152    | 3.125271164        | -2.792206257 | 0.006603158 | 0.027237122      | -3.299861562 |
| RGS3         | -0.273558408    | 5.908003305        | -2.792207474 | 0.006603135 | 0.027237122      | -3.58532624  |
| RAB8B        | -0.167793776    | 6.316743594        | -2.792033295 | 0.006606358 | 0.027242861      | -3.602768484 |
| SRGAP2C      | 0.325336566     | 1.157714945        | 2.791791027  | 0.006610842 | 0.027253892      | -2.966926572 |
| RASSF8       | -0.249684975    | 6.827635528        | -2.791650626 | 0.006613442 | 0.027257152      | -3.601984475 |
| ZC3H18       | 0.096239044     | 5.702953738        | 2.791069922  | 0.006624206 | 0.027294048      | -3.597432632 |
| NAGLU        | 0.106867763     | 6.405673184        | 2.789373811  | 0.006655737 | 0.027416469      | -3.609034304 |
| LINC02185    | -0.96337094     | -4.283389401       | -2.788517101 | 0.006671716 | 0.027474777      | -2.376593253 |
| ACTR3        | -0.14138658     | 8.462119387        | -2.787227192 | 0.006695841 | 0.027566589      | -3.53908599  |
| DECR1        | 0.119916607     | 5.447411457        | 2.786767614  | 0.006704456 | 0.027594514      | -3.593903929 |
| MTMR12       | -0.245297601    | 4.23272024         | -2.786661955 | 0.006706438 | 0.027595132      | -3.517751891 |
| FAM212A      | -0.297354229    | 2.452264684        | -2.786340783 | 0.006712466 | 0.027612393      | -3.263642083 |
| PDCD6IP      | -0.085813164    | 7.247319922        | -2.785806087 | 0.006722512 | 0.027646171      | -3.601091387 |
| KDSR         | -0.167032718    | 7.14808933         | -2.785398529 | 0.006730179 | 0.027670147      | -3.608560657 |
| MYEF2        | -0.576542691    | -1.275007911       | -2.784556119 | 0.006746052 | 0.027727838      | -2.579062553 |
| RASSF3       | 0.193991795     | 3.394557802        | 2.784422444  | 0.006748574 | 0.027730637      | -3.414115844 |
| XAB2         | 0.116698372     | 5.632140206        | 2.783713287  | 0.006761967 | 0.027778094      | -3.611824906 |
| ATF6         | -0.135987466    | 5.586779268        | -2.783412121 | 0.006767662 | 0.027793911      | -3.612631559 |
| PRKCSH       | 0.107699987     | 9.039245585        | 2.783056873  | 0.006774386 | 0.027813941      | -3.525077237 |
| B3GALT6      | 0.145523819     | 5.105195245        | 2.782823884  | 0.006778799 | 0.027824476      | -3.583453788 |
| GUCY1A2      | -0.29513689     | 2.990899235        | -2.78206722  | 0.006793149 | 0.027875781      | -3.401898643 |
| BYSL         | -0.139449857    | 4.018675171        | -2.78122573  | 0.00680914  | 0.027933792      | -3.479655648 |
| HELQ         | 0.124944135     | 3.243677384        | 2.780616068  | 0.006820747 | 0.027973792      | -3.39896207  |
| LINC01139    | -0.629009292    | -0.980576515       | -2.779988    | 0.006832724 | 0.028015284      | -2.646500574 |
| HS1BP3       | 0.125520304     | 5.737655643        | 2.779810512  | 0.006836112 | 0.028021548      | -3.621087755 |
| CCAR1        | -0.120074614    | 5.45224619         | -2.779469255 | 0.00684263  | 0.028040638      | -3.616060271 |
| SLC2A13      | -0.283105382    | 3.20582873         | -2.779261646 | 0.006846599 | 0.02804927       | -3.413929597 |
| AURKAIP1     | 0.245090452     | 5.700118425        | 2.779076942  | 0.006850131 | 0.028056111      | -3.621301367 |
| RIC8B        | 0.13560398      | 3.217850105        | 2.778686538  | 0.006857603 | 0.028071448      | -3.424862455 |
| CLPPR2       | 0.100783469     | 6.067270219        | 2.778731917  | 0.006856734 | 0.028071448      | -3.634550766 |
| COPS7B       | 0.076684056     | 4.122414883        | 2.778463961  | 0.006861866 | 0.028081268      | -3.52330938  |
| FIBP         | 0.164122066     | 6.382580365        | 2.778083114  | 0.006869166 | 0.028103509      | -3.637884032 |
| ARMCX4       | -0.225680793    | 3.570159601        | -2.77752012  | 0.006879971 | 0.028140071      | -3.484553988 |
| PTGES        | 0.164807271     | 6.745037846        | 2.776680126  | 0.00689612  | 0.028198468      | -3.634754466 |
| PPP1CA       | 0.12387113      | 6.29985332         | 2.776366388  | 0.006902161 | 0.02821551       | -3.642261981 |
| PPT2         | 0.243269009     | 1.829503479        | 2.775812467  | 0.006912838 | 0.02823617       | -3.153748614 |
| CELF2        | -0.258791068    | 7.382551826        | -2.77600559  | 0.006909114 | 0.02823617       | -3.621934948 |
| RPS15        | 0.218914051     | 7.036262667        | 2.775899139  | 0.006911167 | 0.02823617       | -3.638093802 |
| TMCC2        | 0.227942747     | 1.883116238        | 2.775421815  | 0.006920377 | 0.028259302      | -3.233386233 |
| CUL4B        | -0.194899034    | 6.399474625        | -2.775143098 | 0.006925761 | 0.028273622      | -3.645639664 |
| IL17RB       | -0.273140174    | 1.141775596        | -2.774911298 | 0.006930241 | 0.028284246      | -3.072779791 |
| SLC22A17     | 0.130164373     | 4.718208905        | 2.774641155  | 0.006935466 | 0.028297903      | -3.580094096 |
| C1QL1        | 0.44437822      | -0.258242857       | 2.774337908  | 0.006941335 | 0.028306516      | -2.750095325 |
| GMIP         | 0.157060612     | 2.603977769        | 2.774369487  | 0.006940724 | 0.028306516      | -3.326783235 |
| PVR          | -0.202055423    | 4.440538993        | -2.774154062 | 0.006944896 | 0.028313371      | -3.560432634 |
| SLC25A3      | 0.090711393     | 8.863387244        | 2.773937849  | 0.006949085 | 0.028322786      | -3.554411784 |
| LIG4         | -0.255871397    | 2.907945246        | -2.773619679 | 0.006955254 | 0.028340262      | -3.302523506 |
| C9orf78      | 0.084600486     | 5.714113873        | 2.772265797  | 0.006981562 | 0.028439764      | -3.643770025 |
| LY6K         | 0.507024487     | 0.031177946        | 2.771393597  | 0.006998558 | 0.028493588      | -2.823817361 |
| MAP3K20      | -0.24446418     | 7.127471267        | -2.771476748 | 0.006996936 | 0.028493588      | -3.640630065 |
| FAM227B      | -0.26787642     | 0.059563788        | -2.771026643 | 0.00700572  | 0.028499639      | -2.912000668 |
| ERMAP        | -0.198920965    | 3.776265157        | -2.771090026 | 0.007004482 | 0.028499639      | -3.499114682 |
| SAMD1        | 0.171820616     | 5.505014943        | 2.771038774  | 0.007005483 | 0.028499639      | -3.639099273 |
| SVBP         | -0.12551956     | 3.661662149        | -2.77058629  | 0.007014323 | 0.028526934      | -3.474155518 |
| LOC105369748 | 0.399371415     | -0.97168445        | 2.768976413  | 0.007045858 | 0.028647452      | -2.677744699 |
| HEXIM2       | 0.267720638     | 0.39297475         | 2.768433658  | 0.007056519 | 0.028683057      | -2.940090639 |
| ACLY         | 0.173884423     | 7.882078012        | 2.768085258  | 0.007063371 | 0.02870316       | -3.609963167 |
| FAU          | 0.169963616     | 7.507508177        | 2.767866974  | 0.007067666 | 0.02871287       | -3.643853946 |
| SEMA4D       | -0.268560258    | 0.320379108        | -2.767600215 | 0.007072919 | 0.02871872       | -2.940961132 |

| Gene     | Log fold change | Average Expression | t            | P-value     | Adjusted P-value | B            |
|----------|-----------------|--------------------|--------------|-------------|------------------|--------------|
| HMGN2    | 0.131532592     | 5.098821765        | 2.76768659   | 0.007071218 | 0.02871872       | -3.626315392 |
| FAM13B   | -0.209910589    | 5.065322747        | -2.767486367 | 0.007075162 | 0.028720086      | -3.620882927 |
| MBNL3    | -0.21245243     | 3.62583882         | -2.766705164 | 0.00709057  | 0.028774876      | -3.496116734 |
| TMEM47   | -0.16161562     | 6.93463932         | -2.766288587 | 0.007098798 | 0.028800512      | -3.657980293 |
| MEX3B    | 0.274600896     | 2.657906876        | 2.765982533  | 0.00710485  | 0.028814558      | -3.351625998 |
| APEX1    | 0.099922637     | 7.234170656        | 2.765920019  | 0.007106086 | 0.028814558      | -3.656066149 |
| SLC25A38 | 0.081498256     | 5.070807248        | 2.765206063  | 0.007120223 | 0.028864111      | -3.632141221 |
| SNRPF    | 0.199889596     | 4.225220963        | 2.764257975  | 0.007139035 | 0.028931874      | -3.560488686 |
| RPL10A   | 0.142699558     | 8.91972648         | 2.764073516  | 0.0071427   | 0.028931874      | -3.580685383 |
| NAA30    | -0.196383549    | 4.909718706        | -2.764136117 | 0.007141456 | 0.028931874      | -3.63369848  |
| ZSCAN12  | -0.282012134    | 1.517281409        | -2.762536328 | 0.007173313 | 0.029048061      | -3.187314105 |
| NAIF1    | 0.146667647     | 2.903628999        | 2.761643454  | 0.007191149 | 0.029112462      | -3.395372877 |
| CYB5R3   | 0.137923429     | 9.444733958        | 2.761342067  | 0.007197179 | 0.02912122       | -3.552818277 |
| PNPLA8   | -0.131634271    | 5.183917698        | -2.761413158 | 0.007195756 | 0.02912122       | -3.65524373  |
| ZNF407   | -0.186182204    | 4.171562389        | -2.760943671 | 0.007205157 | 0.029145671      | -3.610675345 |
| ENO2     | 0.161392638     | 4.872701056        | 2.760504783  | 0.007213954 | 0.029173426      | -3.621696551 |
| FIZ1     | 0.132801337     | 3.938184887        | 2.760317964  | 0.007217702 | 0.029180749      | -3.528605224 |
| WAPL     | -0.201386586    | 5.414829092        | -2.760011541 | 0.007223854 | 0.029197781      | -3.669267138 |
| AP2S1    | 0.181207062     | 6.791222923        | 2.759896116  | 0.007226172 | 0.029199317      | -3.682219585 |
| COX4     | 0.183416751     | 4.669615471        | 2.759585042  | 0.007232423 | 0.02921674       | -3.612657376 |
| REXO2    | 0.119764015     | 6.440334066        | 2.759428348  | 0.007235574 | 0.029221632      | -3.685289563 |
| FAM20C   | 0.123011687     | 7.493109861        | 2.758794101  | 0.00724834  | 0.029265344      | -3.663919874 |
| RAB28    | -0.152740789    | 3.699108249        | -2.758536571 | 0.00725353  | 0.02927845       | -3.502340903 |
| STX3     | -0.170008073    | 3.958574505        | -2.758118879 | 0.007261954 | 0.029288909      | -3.547064676 |
| VEGFB    | 0.216315733     | 8.316121145        | 2.758185307  | 0.007260614 | 0.029288909      | -3.63543655  |
| HMOX2    | 0.135698492     | 5.193981922        | 2.758298114  | 0.007258338 | 0.029288909      | -3.655630932 |
| DEPDC4   | -0.597675318    | -1.805826823       | -2.757957975 | 0.007265202 | 0.029294164      | -2.59518259  |
| CCDC159  | 0.181222673     | 2.901897637        | 2.757755978  | 0.00726928  | 0.029302767      | -3.406993126 |
| RPL39L   | 0.215102428     | 2.474555006        | 2.757381204  | 0.007276854 | 0.029317605      | -3.283284147 |
| COPS9    | 0.191714488     | 4.939191945        | 2.757404462  | 0.007276383 | 0.029317605      | -3.637673658 |
| CFAP69   | -0.189359039    | 1.854568087        | -2.756622013 | 0.007292217 | 0.029371646      | -3.190492588 |
| TSEN34   | 0.128155932     | 5.475525547        | 2.756397301  | 0.00729677  | 0.029382129      | -3.674777098 |
| GAREM1   | 0.208853176     | 2.395899547        | 2.755611853  | 0.007312705 | 0.029438426      | -3.409592158 |
| POC5     | 0.202883622     | 1.519071588        | 2.755467026  | 0.007315647 | 0.0294424        | -3.182876501 |
| EPB41    | -0.35805301     | 3.024574455        | -2.754993881 | 0.007325265 | 0.029457498      | -3.412486992 |
| PARK7    | 0.164016659     | 7.434063586        | 2.755061649  | 0.007323886 | 0.029457498      | -3.678260294 |
| MEPCE    | 0.116104053     | 5.992783684        | 2.755122654  | 0.007322646 | 0.029457498      | -3.691436942 |
| MAN1B1   | 0.085709456     | 6.859206143        | 2.754700806  | 0.007331228 | 0.029473611      | -3.692428043 |
| ZBTB10   | -0.226655407    | 4.893751817        | -2.754372435 | 0.007337915 | 0.029492623      | -3.647564945 |
| EID1     | 0.088309705     | 8.43620879         | 2.753225058  | 0.007361323 | 0.029578815      | -3.632315013 |
| MEF2A    | -0.235578413    | 5.611066911        | -2.752788534 | 0.007370247 | 0.029606775      | -3.690512252 |
| PDZD4    | 0.395005242     | -0.624224215       | 2.752169491  | 0.007382919 | 0.029649029      | -2.777651364 |
| PGD      | 0.122685143     | 7.718217519        | 2.752082465  | 0.007384702 | 0.029649029      | -3.669699595 |
| MZT2B    | 0.238600344     | 4.673175138        | 2.751484757  | 0.007396959 | 0.029690326      | -3.630691265 |
| NDUFB11  | 0.19678797      | 5.796633321        | 2.750979936  | 0.007407326 | 0.029724015      | -3.695906255 |
| ZNF700   | -0.17953145     | 1.573650179        | -2.750773616 | 0.007411566 | 0.029733112      | -3.209057752 |
| PTMS     | 0.194211254     | 8.031811315        | 2.748677881  | 0.007454767 | 0.02989846       | -3.669513057 |
| PPP3CA   | -0.127002286    | 6.253356849        | -2.748463313 | 0.007459203 | 0.029908288      | -3.712872732 |
| DPP8     | -0.191860544    | 5.093413701        | -2.748354076 | 0.007461463 | 0.029909386      | -3.681996907 |
| EZH1     | 0.117018964     | 4.500825299        | 2.74764706   | 0.007476101 | 0.029960091      | -3.646030472 |
| ABCD4    | -0.102248847    | 4.386277043        | -2.747532419 | 0.007478477 | 0.029961642      | -3.608326294 |
| KCTD16   | -0.527794189    | -0.788285962       | -2.746985277 | 0.007489826 | 0.029999133      | -2.730745849 |
| PGBD5    | 0.451538718     | -0.6401411         | 2.746852387  | 0.007492585 | 0.030002207      | -2.873021772 |
| GFPT2    | 0.088414186     | 6.503074872        | 2.746307078  | 0.007503916 | 0.030039593      | -3.718780541 |
| COX7A2   | 0.169932014     | 5.486234106        | 2.746085772  | 0.007508519 | 0.030050034      | -3.699638836 |
| RBM7     | -0.124344045    | 4.773921916        | -2.745573276 | 0.007519188 | 0.030068768      | -3.64370958  |
| CORO1B   | 0.145919803     | 7.290600131        | 2.745746309  | 0.007515584 | 0.030068768      | -3.707792966 |
| PRKAG1   | 0.110651869     | 6.274696667        | 2.745588457  | 0.007518872 | 0.030068768      | -3.719611348 |
| KIAA0355 | -0.252549733    | 4.217981293        | -2.745337091 | 0.00752411  | 0.030072483      | -3.579316204 |
| PPARA    | -0.324110144    | 4.873101732        | -2.745369086 | 0.007523443 | 0.030072483      | -3.685124326 |
| PRR14    | 0.174444533     | 4.609291518        | 2.744977956  | 0.007531599 | 0.030094432      | -3.645875853 |
| CD81     | 0.154223006     | 10.35611929        | 2.744822166  | 0.00753485  | 0.030099438      | -3.538716418 |
| TP53I3   | 0.14719558      | 4.76722176         | 2.74452025   | 0.007541154 | 0.030116634      | -3.652282003 |
| TAPT1    | -0.1310141      | 3.457280306        | -2.74423351  | 0.007547145 | 0.030124588      | -3.504066395 |
| MED20    | 0.098598855     | 3.960890266        | 2.744327789  | 0.007545175 | 0.030124588      | -3.59132103  |
| C14orf28 | 0.143415003     | 2.362889902        | 2.744077253  | 0.007550412 | 0.030129645      | -3.360264858 |
| NMD3     | -0.123700548    | 5.433920529        | -2.743478065 | 0.007562951 | 0.030171689      | -3.702701817 |
| FANCB    | -0.444855543    | -0.808744542       | -2.743338395 | 0.007565877 | 0.030175369      | -2.776681834 |
| STAT5B   | -0.087485416    | 5.635193891        | -2.743204954 | 0.007568673 | 0.03017853       | -3.712285683 |
| TMEM254  | -0.110131681    | 3.679782533        | -2.74271236  | 0.007579003 | 0.030203729      | -3.537347929 |

| Gene         | Log fold change | Average Expression | t            | P-value     | Adjusted P-value | B            |
|--------------|-----------------|--------------------|--------------|-------------|------------------|--------------|
| RNF181       | 0.196169683     | 5.074054631        | 2.742769882  | 0.007577796 | 0.030203729      | -3.68313692  |
| RAD50        | -0.133464569    | 6.152436346        | -2.742613446 | 0.007581078 | 0.030204011      | -3.725852948 |
| ZNF518B      | -0.134347541    | 3.987994628        | -2.742196953 | 0.007589825 | 0.03022689       | -3.596068513 |
| AVL9         | -0.222047018    | 4.248665784        | -2.742148913 | 0.007590834 | 0.03022689       | -3.631472655 |
| MAP3K2       | -0.201958762    | 5.267452147        | -2.741841219 | 0.007597302 | 0.030244651      | -3.705217891 |
| TM2D3        | -0.109770873    | 4.605651352        | -2.740914344 | 0.007616817 | 0.030314327      | -3.655031695 |
| CARF         | -0.226045326    | 1.840824885        | -2.740430868 | 0.007627014 | 0.030346894      | -3.214538288 |
| RNASEH1      | -0.246524165    | 3.801386684        | -2.740253454 | 0.007630759 | 0.030353778      | -3.587057107 |
| ARHGEF40     | 0.077190859     | 6.673246667        | 2.739420257  | 0.00764837  | 0.030415799      | -3.735241944 |
| RAB34        | 0.130280589     | 7.301930044        | 2.738648653  | 0.007664712 | 0.030464703      | -3.722698565 |
| ZFR          | -0.219918678    | 6.762372602        | -2.738729903 | 0.00766299  | 0.030464703      | -3.73274967  |
| COMMD4       | 0.15796056      | 5.068549458        | 2.738523153  | 0.007667373 | 0.030467241      | -3.695122705 |
| DBNL         | 0.116517014     | 6.816495207        | 2.738420561  | 0.007669549 | 0.03046785       | -3.735229062 |
| MFN2         | 0.075555233     | 6.768633121        | 2.738072274  | 0.00767694  | 0.030489172      | -3.73542441  |
| ACOT7        | 0.181023175     | 4.504165445        | 2.737889362  | 0.007680825 | 0.030496558      | -3.657493337 |
| MRPL55       | 0.222322031     | 4.016660562        | 2.73760383   | 0.007686892 | 0.030512605      | -3.591506507 |
| TMEM71       | -0.362025192    | -0.549104355       | -2.737251764 | 0.007694379 | 0.030534278      | -2.822057303 |
| LOC101927151 | -0.272729867    | -0.134739595       | -2.737017438 | 0.007699365 | 0.030534332      | -2.929129205 |
| SUCLG2-AS1   | -0.34440774     | 0.848032831        | -2.736965394 | 0.007700473 | 0.030534332      | -3.05631784  |
| TULP4        | -0.171826631    | 4.624567996        | -2.737003989 | 0.007699652 | 0.030534332      | -3.67658425  |
| IK           | 0.129150332     | 6.013035746        | 2.735992099  | 0.007721221 | 0.030608544      | -3.741170259 |
| CRIP2        | 0.206269335     | 5.315942654        | 2.735871395  | 0.007723797 | 0.030610702      | -3.706049883 |
| C9orf172     | 0.201454434     | 1.481067431        | 2.735412193  | 0.007733606 | 0.030641517      | -3.202253583 |
| INTS14       | 0.077048377     | 4.698486696        | 2.73495878   | 0.007743303 | 0.03067187       | -3.690274275 |
| TMEM173      | 0.105183203     | 6.514005658        | 2.734324032  | 0.007756897 | 0.030717638      | -3.748479599 |
| RSAD1        | 0.156412209     | 4.360944924        | 2.734186719  | 0.00775984  | 0.030721218      | -3.630669218 |
| DAD1         | 0.134411389     | 7.204346177        | 2.734086009  | 0.007762    | 0.030721694      | -3.73777999  |
| RPS29        | 0.197422057     | 6.899049579        | 2.733354922  | 0.00777693  | 0.03077572       | -3.747910732 |
| CLSPN        | -0.48013406     | 1.180755265        | -2.733045587 | 0.007784342 | 0.030785856      | -3.170747299 |
| ROR1         | -0.35300258     | 5.672843947        | -2.733120346 | 0.007782734 | 0.030785856      | -3.742322386 |
| PLOD1        | 0.084204087     | 8.630808614        | 2.732133934  | 0.007803967 | 0.030855369      | -3.673394041 |
| MFSD11       | -0.113154695    | 3.819250642        | -2.73159675  | 0.007815552 | 0.030893066      | -3.609658704 |
| SLC25A37     | -0.15262464     | 4.388053707        | -2.731100125 | 0.007826276 | 0.030927341      | -3.672319811 |
| P2RY11       | -0.290583125    | 1.080171196        | -2.730769967 | 0.007833413 | 0.030947426      | -3.041747156 |
| YIPF2        | 0.105876705     | 4.928694761        | 2.730530386  | 0.007838596 | 0.030959782      | -3.707882062 |
| RPS25        | 0.183204053     | 8.487242161        | 2.730426866  | 0.007840836 | 0.030960513      | -3.691061361 |
| SLC35B4      | -0.227470287    | 5.126993736        | -2.730283126 | 0.007843948 | 0.030960987      | -3.724549669 |
| C20orf27     | 0.151526466     | 5.668260833        | 2.730136553  | 0.007847122 | 0.030960987      | -3.74559209  |
| FBXW2        | -0.110575556    | 6.111054504        | -2.730157345 | 0.007846672 | 0.030960987      | -3.758274867 |
| RRS1         | -0.177710959    | 4.733177432        | -2.729717817 | 0.007856197 | 0.030972456      | -3.687402718 |
| DLD          | -0.09566734     | 5.67812182         | -2.729808684 | 0.007854227 | 0.030972456      | -3.749927483 |
| RBM25        | -0.200926413    | 5.931469036        | -2.729755235 | 0.007855386 | 0.030972456      | -3.75999087  |
| MAB21L1      | 0.283542931     | 2.395450548        | 2.729579157  | 0.007859204 | 0.030976204      | -3.432242373 |
| SLC38A4      | -0.380074769    | 2.454963776        | -2.729478862 | 0.00786138  | 0.030976675      | -3.381340896 |
| GTF2H3       | -0.171182317    | 4.328619617        | -2.729013423 | 0.007871484 | 0.031008378      | -3.679987    |
| CREB3L4      | -0.192199891    | 1.925388353        | -2.728199721 | 0.007889178 | 0.031061832      | -3.239627824 |
| LMLN         | -0.294398638    | 2.820919854        | -2.728290248 | 0.007887207 | 0.031061832      | -3.448052046 |
| MUL1         | -0.08796338     | 5.614089537        | -2.727956467 | 0.007894474 | 0.031074564      | -3.7490392   |
| DLX4         | -0.979572054    | -3.281452776       | -2.727118615 | 0.007912741 | 0.0311302        | -2.539520565 |
| FAM171B      | -0.316371365    | 4.304352719        | -2.727157704 | 0.007911888 | 0.0311302        | -3.671926326 |
| BIVM         | -0.106455223    | 4.074847019        | -2.726867985 | 0.007918213 | 0.031139734      | -3.619810681 |
| MTDH         | -0.223798638    | 7.104523868        | -2.726818278 | 0.007919299 | 0.031139734      | -3.752043507 |
| CCNI         | 0.134805374     | 9.455056541        | 2.7262402    | 0.007931935 | 0.03118128       | -3.646304581 |
| PP2D1        | -0.776417972    | -2.264523762       | -2.72462711  | 0.007967291 | 0.031303933      | -2.597659712 |
| MLLT1        | -0.08550763     | 7.038455564        | -2.724705683 | 0.007965566 | 0.031303933      | -3.7666874   |
| E2F6         | -0.161344425    | 2.67381161         | -2.724437173 | 0.007971464 | 0.03131216       | -3.376628723 |
| FUOM         | 0.27882446      | 1.149082317        | 2.724107449  | 0.007978712 | 0.031332462      | -3.148181623 |
| MTCH2        | 0.0957395       | 6.479641091        | 2.723854829  | 0.00798427  | 0.031346114      | -3.77515916  |
| LSM1         | 0.166563        | 3.63048943         | 2.723691715  | 0.00798786  | 0.031352038      | -3.593623391 |
| CIPC         | -0.24255763     | 2.420102924        | -2.723502335 | 0.00799203  | 0.031352068      | -3.444566423 |
| NUFIP1       | -0.172303236    | 2.95549316         | -2.723502694 | 0.007992022 | 0.031352068      | -3.468060966 |
| RBSN         | -0.219624713    | 5.030765948        | -2.723075164 | 0.008001444 | 0.031380825      | -3.743574061 |
| RWDD2A       | -0.163511528    | 2.96371086         | -2.72285824  | 0.008006228 | 0.031383247      | -3.505908459 |
| ZNF318       | -0.179242327    | 5.026761088        | -2.722874959 | 0.008005859 | 0.031383247      | -3.744770322 |
| PEMT         | 0.181355517     | 4.1207215          | 2.722538635  | 0.008013282 | 0.031399856      | -3.65265294  |
| ORC3         | 0.090593008     | 4.526614994        | 2.722477392  | 0.008014634 | 0.031399856      | -3.700541234 |
| AHRR         | -0.163858747    | 5.529719084        | -2.7223038   | 0.008018468 | 0.031406709      | -3.771999754 |
| ZDHHC24      | 0.144947625     | 4.335613227        | 2.722087288  | 0.008023253 | 0.031407771      | -3.677468872 |
| MPDZ         | -0.238756707    | 5.489280731        | -2.722008511 | 0.008024994 | 0.031407771      | -3.763116014 |
| CASN1A1      | -0.2569973      | 6.421270647        | -2.722152115 | 0.00802182  | 0.031407771      | -3.779109927 |

| Gene         | Log fold change | Average Expression | t            | P-value     | Adjusted P-value | B            |
|--------------|-----------------|--------------------|--------------|-------------|------------------|--------------|
| NFIC         | -0.09750651     | 7.901152932        | -2.720883048 | 0.008049911 | 0.031497108      | -3.738736804 |
| ESD          | 0.11248125      | 7.363420249        | 2.720718706  | 0.008053556 | 0.031503185      | -3.766005729 |
| PTGES3       | 0.067225124     | 7.489607452        | 2.719979934  | 0.008069957 | 0.031559147      | -3.761371846 |
| FLT1         | -0.38588404     | 2.545852607        | -2.719521217 | 0.008080156 | 0.031568332      | -3.441005623 |
| LAMTOR2      | 0.17329806      | 4.901331268        | 2.719497303  | 0.008080688 | 0.031568332      | -3.729782516 |
| AKIRIN1      | -0.154649598    | 5.356802422        | -2.719600187 | 0.0080784   | 0.031568332      | -3.742832575 |
| NECTIN2      | 0.112859574     | 5.754775762        | 2.719549047  | 0.008079537 | 0.031568332      | -3.778148726 |
| EFHD2        | 0.131785309     | 5.77758998         | 2.719031744  | 0.008091052 | 0.031600625      | -3.781201766 |
| TAB3         | -0.143689019    | 4.049626332        | -2.717611538 | 0.008122743 | 0.031714043      | -3.662648835 |
| GRSF1        | -0.074838911    | 6.55582332         | -2.717541781 | 0.008124303 | 0.031714043      | -3.790185573 |
| FAM129A      | -0.287243472    | 7.326064741        | -2.717065829 | 0.00813495  | 0.031747381      | -3.77218547  |
| CD99         | 0.139468954     | 9.391622465        | 2.716949962  | 0.008137544 | 0.031749279      | -3.668730519 |
| WDR73        | -0.226084515    | 1.072498339        | -2.716323228 | 0.008151589 | 0.031795839      | -3.158385178 |
| EDF1         | 0.203319768     | 7.648140743        | 2.715083966  | 0.008179424 | 0.031896154      | -3.771626484 |
| FUBP3        | -0.203756242    | 5.710469326        | -2.714157618 | 0.008200288 | 0.031969238      | -3.79575749  |
| LRR1         | -0.158839435    | 2.383012946        | -2.713961794 | 0.008204704 | 0.03197818       | -3.435299508 |
| RCBTB1       | -0.119951289    | 4.786217446        | -2.713532294 | 0.008214399 | 0.032007684      | -3.74199708  |
| SLC16A3      | 0.19867978      | 5.600657132        | 2.7131595    | 0.008222822 | 0.032032219      | -3.796310551 |
| C20orf144    | 0.744858482     | -2.910105689       | 2.712409469  | 0.008239793 | 0.032089944      | -2.648802785 |
| ALKBH6       | 0.620973942     | -1.531386461       | 2.712316399  | 0.008241901 | 0.032089944      | -2.743540681 |
| RPL10        | 0.150383835     | 8.731554285        | 2.711992631  | 0.008249238 | 0.032110212      | -3.722783386 |
| KDM7A        | -0.268539614    | 4.28390656         | -2.711766046 | 0.008254377 | 0.032113618      | -3.705901128 |
| EIF3I        | 0.135584354     | 7.768580639        | 2.711784527  | 0.008253957 | 0.032113618      | -3.773526041 |
| PCID2        | -0.083644559    | 5.128347447        | -2.71145222  | 0.008261498 | 0.032133026      | -3.767336436 |
| CCDC106      | 0.183904779     | 4.231354555        | 2.711261036  | 0.00826584  | 0.032141613      | -3.681999554 |
| DNAJC18      | 0.104241994     | 4.191559031        | 2.710668211  | 0.008279314 | 0.032185701      | -3.68835462  |
| EFEMP2       | 0.105114278     | 8.423843518        | 2.709741144  | 0.008300427 | 0.032251129      | -3.744440905 |
| SUMO2        | 0.102223079     | 6.083963092        | 2.709831795  | 0.00829836  | 0.032251129      | -3.808166017 |
| FAM49B       | -0.137951691    | 3.347825531        | -2.709562408 | 0.008304503 | 0.032258646      | -3.567166701 |
| FAM200A      | 0.173134353     | 2.545182441        | 2.708925863  | 0.008319034 | 0.032306761      | -3.545543654 |
| MT1X         | 0.219730496     | 1.485465098        | 2.708653194  | 0.008325266 | 0.032322629      | -3.280151974 |
| TMEM115      | 0.111654029     | 6.331427715        | 2.708426515  | 0.008330449 | 0.032334421      | -3.813664204 |
| MSL2         | -0.25309651     | 4.126309749        | -2.70688681  | 0.008365738 | 0.032463028      | -3.705912897 |
| YPEL5        | -0.063003338    | 6.658527068        | -2.706458077 | 0.008375588 | 0.032492883      | -3.817799919 |
| SLC25A32     | -0.177696999    | 4.825436785        | -2.705869633 | 0.008389125 | 0.03253702       | -3.740225255 |
| TCTE3        | -0.394865664    | -0.859038369       | -2.705616812 | 0.008394948 | 0.032542844      | -2.862339888 |
| NCKAP1       | -0.20434706     | 7.522326983        | -2.705679772 | 0.008393497 | 0.032542844      | -3.791140141 |
| POLR2J       | 0.205449127     | 3.733202491        | 2.705362141  | 0.008400816 | 0.032557215      | -3.643140355 |
| TMEM250      | 0.073757389     | 6.368877724        | 2.705072047  | 0.008407506 | 0.03257476       | -3.822156302 |
| RILPL2       | 0.140112289     | 4.770626413        | 2.70427434   | 0.008425925 | 0.032637732      | -3.757924481 |
| TMEM94       | -0.088658577    | 5.420900409        | -2.704142028 | 0.008428984 | 0.032641187      | -3.801705299 |
| RMPL1        | 0.15807719      | 9.948795264        | 2.703784386  | 0.008437257 | 0.032664827      | -3.668618026 |
| LOC100507053 | -0.359039628    | -0.012688585       | -2.703688584 | 0.008439474 | 0.032665016      | -2.948281566 |
| WDR11        | -0.12592742     | 5.157580324        | -2.702338694 | 0.008470774 | 0.03277774       | -3.796308926 |
| GSPT2        | -0.203249086    | 4.066378338        | -2.701245489 | 0.0084962   | 0.032867682      | -3.725024137 |
| SIGMAR1      | 0.135853768     | 6.762064178        | 2.700904589  | 0.008504143 | 0.032889962      | -3.830356589 |
| MESP2        | 0.360912357     | -0.11977672        | 2.700632201  | 0.008510494 | 0.03290559       | -2.956886883 |
| THEM4        | -0.132814941    | 2.87211172         | -2.700543969 | 0.008512552 | 0.03290559       | -3.484457352 |
| KAT6B        | 0.164215892     | 4.998370542        | 2.700071122  | 0.00852359  | 0.032939807      | -3.791646472 |
| CSTB         | 0.197963182     | 7.595659405        | 2.699919308  | 0.008527137 | 0.032945061      | -3.810206978 |
| PPM1L        | -0.333758811    | 2.943446782        | -2.699632294 | 0.008533846 | 0.03296088       | -3.540374488 |
| ABHD11       | 0.194775409     | 3.07858363         | 2.699556975  | 0.008535608 | 0.03296088       | -3.573184729 |
| CDKN2D       | -0.221944581    | 1.634868405        | -2.698804231 | 0.008553229 | 0.032975744      | -3.270042407 |
| ARHGEF19     | 0.274912466     | 1.615056548        | 2.698825779  | 0.008552724 | 0.032975744      | -3.296502502 |
| SLC30A4      | -0.192963435    | 2.779238956        | -2.699049837 | 0.008547476 | 0.032975744      | -3.530370672 |
| TCHP         | 0.131155806     | 3.852572961        | 2.69923971   | 0.008543031 | 0.032975744      | -3.674832448 |
| HAUS2        | -0.161030972    | 3.886393213        | -2.698738062 | 0.00855478  | 0.032975744      | -3.707901281 |
| RIF1         | -0.285307645    | 5.21177444         | -2.699027974 | 0.008547988 | 0.032975744      | -3.817457403 |
| ERP29        | 0.144102393     | 7.428186751        | 2.698744818  | 0.008554622 | 0.032975744      | -3.819210016 |
| FMO5         | -0.285219294    | 0.912869352        | -2.698340111 | 0.008564111 | 0.032996525      | -3.164756379 |
| NECAP2       | 0.067702577     | 6.194173317        | 2.698321304  | 0.008564552 | 0.032996525      | -3.837529832 |
| ANKRD37      | 0.269165589     | 0.577725696        | 2.697918691  | 0.008574002 | 0.033024488      | -3.101334094 |
| WDFY1        | -0.138545932    | 6.422632304        | -2.697280341 | 0.008589005 | 0.033073818      | -3.840614166 |
| PLEKHA6      | 0.232629941     | 2.86151841         | 2.69591093   | 0.008621271 | 0.033172624      | -3.491087215 |
| TADA2A       | -0.160009986    | 3.1718641          | -2.69595389  | 0.008620257 | 0.033172624      | -3.625227251 |
| MAK16        | -0.165052792    | 3.875494573        | -2.695991191 | 0.008619377 | 0.033172624      | -3.699944252 |
| NDUFA10      | 0.079100222     | 6.047076246        | 2.695269438  | 0.008636423 | 0.033222442      | -3.843519159 |
| ZBED8        | 0.223439855     | 1.013492394        | 2.694819244  | 0.008647072 | 0.033254912      | -3.391033046 |
| AKAP9        | 0.267090293     | 4.11318565         | 2.69418195   | 0.008662166 | 0.033304459      | -3.74836674  |
| C7orf50      | 0.184683441     | 5.440039948        | 2.693151896  | 0.008686614 | 0.033389934      | -3.825366232 |



| Gene        | Log fold change | Average Expression | t            | P-value     | Adjusted P-value | B            |
|-------------|-----------------|--------------------|--------------|-------------|------------------|--------------|
| DOC2B       | 0.857283429     | -4.642036791       | 2.69285844   | 0.00869359  | 0.033408226      | -2.592785764 |
| MFSD10      | 0.130728294     | 5.763818705        | 2.6923368    | 0.008706004 | 0.033447398      | -3.84381976  |
| ZNF275      | -0.229581869    | 5.464952035        | -2.691571721 | 0.00872424  | 0.033508913      | -3.813907749 |
| DOCK4       | -0.314304974    | 2.79547175         | -2.691471836 | 0.008726624 | 0.033509524      | -3.52838241  |
| KIAA0556    | -0.111565047    | 4.245468488        | -2.690959218 | 0.008738865 | 0.033547978      | -3.742601678 |
| BTN3A1      | -0.128550465    | 4.866730295        | -2.690859225 | 0.008741255 | 0.033548602      | -3.800588172 |
| GDF1        | 0.280817523     | 0.783222727        | 2.690723183  | 0.008744507 | 0.033552535      | -3.18170962  |
| TAF12       | 0.174974959     | 4.774225171        | 2.690421208  | 0.00875173  | 0.03356315       | -3.787041516 |
| DHRS7       | 0.131550503     | 5.616885629        | 2.690451057  | 0.008751015 | 0.03356315       | -3.845075596 |
| MED26       | -0.202134979    | 2.26878313         | -2.689841319 | 0.008765615 | 0.033607844      | -3.415355952 |
| PIPSL       | -0.412984606    | -0.63485326        | -2.689465743 | 0.008774618 | 0.033633804      | -2.89654613  |
| ZSCAN16-AS1 | 0.2465083       | 2.171779451        | 2.688851483  | 0.008789362 | 0.033681747      | -3.420147266 |
| GPX4        | 0.167790777     | 8.679077841        | 2.688557234  | 0.008796433 | 0.03370027       | -3.783906099 |
| PPP4C       | 0.137383179     | 5.936140842        | 2.688302991  | 0.008802546 | 0.033715117      | -3.85886495  |
| ALDH1B1     | -0.14921675     | 5.628182755        | -2.688031303 | 0.008809083 | 0.03373158       | -3.846456057 |
| JPT1        | 0.136799973     | 5.375219829        | 2.687834232  | 0.008813828 | 0.033732598      | -3.841299289 |
| FKBP1A      | 0.133528312     | 7.427072953        | 2.687918068  | 0.008811809 | 0.033732598      | -3.845452445 |
| ZNF688      | 0.225965997     | 3.586943076        | 2.687489601  | 0.008822131 | 0.033755799      | -3.669007179 |
| FOPNL       | -0.078593885    | 5.009981582        | -2.687358301 | 0.008825296 | 0.033759335      | -3.813185004 |
| KIAA1586    | 0.130396327     | 3.400579002        | 2.687087592  | 0.008831825 | 0.033775734      | -3.649926755 |
| AMMECR1L    | -0.198504259    | 4.214633974        | -2.686929758 | 0.008835634 | 0.033781723      | -3.763111814 |
| CAMSAP2     | -0.189443854    | 6.252022288        | -2.686588583 | 0.008843872 | 0.033804641      | -3.866838586 |
| PLIN4       | 0.391555973     | 0.827825111        | 2.686298037  | 0.008850893 | 0.033814318      | -3.163474955 |
| SOD1        | 0.16464794      | 7.024784783        | 2.686368327  | 0.008849194 | 0.033814318      | -3.862472789 |
| KCTD7       | -0.193970598    | 3.632113853        | -2.686062578 | 0.008856587 | 0.033816557      | -3.736599628 |
| FUS         | 0.142951632     | 7.407780241        | 2.685995318  | 0.008858214 | 0.033816557      | -3.839713749 |
| DHX15       | -0.130672453    | 6.484887718        | -2.686113678 | 0.008855351 | 0.033816557      | -3.867928718 |
| ZC4H2       | -0.124264383    | 3.151688014        | -2.685610527 | 0.008867527 | 0.033843534      | -3.590300907 |
| SYTL3       | -0.303222754    | 0.633305959        | -2.685414353 | 0.008872279 | 0.033853092      | -3.114930623 |
| ICAM1       | -0.208726098    | 5.265109286        | -2.685058055 | 0.008880915 | 0.033868886      | -3.8254134   |
| CSF1        | -0.1424868      | 7.726231558        | -2.685124075 | 0.008879314 | 0.033868886      | -3.846214156 |
| PPIP5K2     | -0.207123959    | 4.634111644        | -2.684494537 | 0.008894589 | 0.033900553      | -3.808582922 |
| TNPO1       | -0.254267239    | 7.088688017        | -2.684437676 | 0.00889597  | 0.033900553      | -3.857514938 |
| SYT11       | -0.355251169    | 5.992969381        | -2.684568438 | 0.008892794 | 0.033900553      | -3.871047686 |
| CAPZB       | 0.120254139     | 8.347626574        | 2.683920342  | 0.008908542 | 0.033923745      | -3.811677865 |
| SEC23IP     | -0.208598834    | 5.787131513        | -2.683918831 | 0.008908578 | 0.033923745      | -3.872470269 |
| GRHRP       | 0.141542954     | 6.211814528        | 2.683909248  | 0.008908811 | 0.033923745      | -3.873367217 |
| ELAC1       | 0.182120436     | 2.007886057        | 2.683680487  | 0.008914376 | 0.033936356      | -3.42337397  |
| MAPK8IP1    | 0.129655472     | 4.305049983        | 2.683553784  | 0.008917459 | 0.033939517      | -3.770966624 |
| CLYBL       | 0.269103191     | 0.507901611        | 2.683355594  | 0.008922284 | 0.033949304      | -3.111248174 |
| TCP11L1     | 0.142005768     | 3.647692727        | 2.682128807  | 0.008952204 | 0.034054546      | -3.704396393 |
| NFKB1L1     | 0.200628778     | 4.449658033        | 2.682000967  | 0.00895327  | 0.034057826      | -3.782380358 |
| MED14       | -0.166644086    | 4.659183325        | -2.681859097 | 0.008958794 | 0.034062412      | -3.83009928  |
| PEX11A      | 0.182107882     | 1.944064876        | 2.681409576  | 0.008969788 | 0.034095604      | -3.447152799 |
| POLR2L      | 0.221152493     | 7.086634963        | 2.680879926  | 0.008982756 | 0.034136287      | -3.874532937 |
| RPL41       | 0.151483826     | 8.337435909        | 2.680520234  | 0.008991573 | 0.034161176      | -3.822567854 |
| PCDHA10     | -0.605158697    | -1.985221213       | -2.679156749 | 0.009025068 | 0.034279783      | -2.772925506 |
| DCXR        | 0.199722898     | 4.486226276        | 2.678865928  | 0.009032226 | 0.034298325      | -3.791009626 |
| NARFL       | 0.178156818     | 3.878020926        | 2.677915671  | 0.009055654 | 0.03437862       | -3.740296284 |
| SLC7A11-AS1 | -0.851394802    | -4.350509696       | -2.677383196 | 0.009068805 | 0.034419874      | -2.626181251 |
| CSTF2       | 0.121421464     | 3.122349131        | 2.676669345  | 0.009086464 | 0.034478209      | -3.667524178 |
| HDHD3       | 0.173351978     | 2.276762491        | 2.6765189    | 0.009090189 | 0.03448366       | -3.536436692 |
| FBL         | 0.138197881     | 6.783574974        | 2.675322871  | 0.009119857 | 0.034587494      | -3.893741116 |
| CASKIN2     | -0.118131636    | 4.181000156        | -2.675196228 | 0.009123003 | 0.034590718      | -3.809914989 |
| FAM20A      | 0.120349576     | 7.179042375        | 2.675034968  | 0.009127012 | 0.034597207      | -3.884792868 |
| STX7        | -0.138382642    | 5.749008874        | -2.674466619 | 0.009141115 | 0.034642085      | -3.886699843 |
| SUV39H1     | -0.198172663    | 1.731947667        | -2.673950073 | 0.009154018 | 0.034682124      | -3.395962246 |
| NUDT12      | 0.1874754       | 2.76159686         | 2.672765953  | 0.009183577 | 0.034785368      | -3.610801589 |
| ALG2        | -0.069626562    | 5.933632885        | -2.672548392 | 0.009189018 | 0.034797225      | -3.898445009 |
| WDR89       | -0.165282791    | 2.797425055        | -2.67229096  | 0.009195459 | 0.034805965      | -3.630294673 |
| KMT5A       | -0.142417293    | 3.746699588        | -2.672271471 | 0.009195947 | 0.034805965      | -3.737845271 |
| PRDX2       | 0.174807981     | 6.452058434        | 2.671489635  | 0.009215535 | 0.034871345      | -3.905143703 |
| TACSTD2     | 0.485805705     | -0.838815006       | 2.671355948  | 0.009218889 | 0.034872729      | -2.98108707  |
| TMEM54      | 0.211343938     | 4.475061007        | 2.671290485  | 0.009220531 | 0.034872729      | -3.811380554 |
| AKAP3       | 0.576986294     | -1.057163545       | 2.670852167  | 0.009231535 | 0.034905583      | -2.862919239 |
| TAF1A       | -0.167286567    | 2.311224519        | -2.670391078 | 0.009243124 | 0.034940631      | -3.548446651 |
| PTK2B       | -0.251996244    | 2.700464454        | -2.670186774 | 0.009248263 | 0.034951286      | -3.520663078 |
| VPS45       | -0.099043383    | 4.553587555        | -2.670028583 | 0.009252243 | 0.034957561      | -3.81693856  |
| CD151       | 0.13824221      | 8.478696343        | 2.669746509  | 0.009259346 | 0.034975622      | -3.841526384 |
| PDAP1       | 0.148853326     | 6.215826057        | 2.669162891  | 0.009274056 | 0.035022407      | -3.909675414 |

| Gene         | Log fold change | Average Expression | t            | P-value     | Adjusted P-value | B            |
|--------------|-----------------|--------------------|--------------|-------------|------------------|--------------|
| RAC3         | 0.298745856     | 0.641563006        | 2.668251515  | 0.00929707  | 0.035094069      | -3.203470162 |
| DNNTIP1      | 0.168336908     | 4.378138231        | 2.668216575  | 0.009297954 | 0.035094069      | -3.814832409 |
| CRYBG1       | -0.256159955    | 4.375885278        | -2.668134797 | 0.009300021 | 0.035094069      | -3.821426017 |
| ITCH         | -0.267839705    | 5.438591397        | -2.66795929  | 0.009304461 | 0.035102027      | -3.900361163 |
| FLJ31104     | -0.829755065    | -2.937266503       | -2.667773444 | 0.009309163 | 0.035110976      | -2.680690509 |
| BICRAL       | -0.20797194     | 4.480551892        | -2.667449732 | 0.00931736  | 0.035133094      | -3.822982064 |
| NEDD4L       | -0.234682438    | 3.340966251        | -2.665712217 | 0.009361468 | 0.035290578      | -3.673895519 |
| CDK11B       | 0.109305632     | 4.4173471          | 2.66549384   | 0.009367025 | 0.035302692      | -3.82904341  |
| CCDC127      | -0.101716965    | 5.073980381        | -2.665400005 | 0.009369413 | 0.035302862      | -3.889315396 |
| ROBO1        | -0.239749975    | 5.326316137        | -2.664554557 | 0.009390961 | 0.035375201      | -3.900810422 |
| NUAK2        | 0.546155838     | 0.782516435        | 2.664284428  | 0.009397855 | 0.035392321      | -3.117372791 |
| SLC39A14     | -0.376023154    | 6.954996391        | -2.664058463 | 0.009403625 | 0.035405201      | -3.905026291 |
| CHD1         | -0.25281994     | 4.706783403        | -2.663368925 | 0.009421254 | 0.03546271       | -3.845561281 |
| CXCL16       | 0.202542364     | 2.716968267        | 2.662076901  | 0.009454367 | 0.035569231      | -3.622927292 |
| APOOL        | -0.202267648    | 4.062361895        | -2.662156116 | 0.009452333 | 0.035569231      | -3.79748957  |
| BAD          | 0.187319        | 4.680530881        | 2.661988482  | 0.009456636 | 0.035569231      | -3.852700604 |
| MDC1         | -0.157927867    | 4.348761857        | -2.66187539  | 0.00945954  | 0.035571273      | -3.840771093 |
| ANAPC11      | 0.187745501     | 5.563955772        | 2.661664224  | 0.009464965 | 0.035582789      | -3.910566442 |
| SH3RF1       | -0.176369662    | 4.827775463        | -2.660906158 | 0.009484462 | 0.035647191      | -3.813402995 |
| CTDNBP1      | 0.112047835     | 6.504929502        | 2.660715272  | 0.009489378 | 0.035656768      | -3.931926599 |
| CTNNB1       | -0.108799114    | 8.227851697        | -2.660512676 | 0.009494597 | 0.035662444      | -3.872304018 |
| URM1         | 0.142759968     | 6.232684066        | 2.660472868  | 0.009495623 | 0.035662444      | -3.930789505 |
| DPP7         | 0.17165544      | 7.41013579         | 2.659197117  | 0.009528552 | 0.035777196      | -3.918713174 |
| TMSB4X       | 0.150094615     | 8.876996932        | 2.658761722  | 0.009539814 | 0.035810557      | -3.843145217 |
| PANO1        | -0.346328485    | -0.590936423       | -2.658356347 | 0.009550311 | 0.035832101      | -3.021809963 |
| MRPL19       | -0.128651845    | 4.902607237        | -2.658391321 | 0.009549405 | 0.035832101      | -3.888114142 |
| TRIM37       | -0.167195295    | 4.575865602        | -2.658039719 | 0.009558517 | 0.035853958      | -3.871572193 |
| ENKUR        | -0.786591607    | -2.927327008       | -2.657499329 | 0.009572536 | 0.035897608      | -2.74652416  |
| ADAM17       | -0.27251005     | 4.898540068        | -2.656517042 | 0.009598069 | 0.035975443      | -3.902489651 |
| MFSD14A      | -0.238962069    | 5.783326398        | -2.656594882 | 0.009596043 | 0.035975443      | -3.940467954 |
| PCDH9        | -0.349854508    | 1.735610488        | -2.655512379 | 0.009624246 | 0.036064588      | -3.430184762 |
| BLMH         | 0.094178516     | 5.271474201        | 2.654713896  | 0.009645098 | 0.036133737      | -3.920170334 |
| IL16         | -0.277332294    | 2.26459542         | -2.654502742 | 0.009650619 | 0.036145431      | -3.545866205 |
| NDFIP2       | -0.263305616    | 4.833454032        | -2.654329631 | 0.009655147 | 0.036153403      | -3.91621635  |
| MARCH4       | -0.303619729    | 3.494616595        | -2.654160268 | 0.00965958  | 0.03616101       | -3.753669828 |
| SCOC         | -0.075451225    | 5.734836411        | -2.654000099 | 0.009663773 | 0.03616772       | -3.93850741  |
| PPP2R2C      | 0.638508735     | -2.252646964       | 2.653890293  | 0.009666649 | 0.036169497      | -2.817834882 |
| DPM3         | 0.204741268     | 3.582241708        | 2.653154254  | 0.009685945 | 0.036219014      | -3.754160775 |
| DDR2         | -0.31879523     | 8.455201727        | -2.653110409 | 0.009687096 | 0.036219014      | -3.873838926 |
| SLC36A1      | -0.193773602    | 4.80513809         | -2.653260075 | 0.009683169 | 0.036219014      | -3.905038316 |
| MIR646HG     | -0.782012616    | -2.724099023       | -2.652370739 | 0.009706525 | 0.036282652      | -2.768909872 |
| ADCY8        | 0.582601002     | 0.04061329         | 2.652133363  | 0.009712767 | 0.036287978      | -3.142038931 |
| VAPB         | -0.132023368    | 5.771267117        | -2.65217424  | 0.009711692 | 0.036287978      | -3.9436439   |
| NLRP10       | -0.618534228    | -1.979444126       | -2.651828242 | 0.009720797 | 0.036308506      | -2.803068893 |
| KLF9         | -0.173122227    | 4.966092688        | -2.651741446 | 0.009723082 | 0.036308506      | -3.89258189  |
| LOC101928820 | -0.65318008     | -2.813623376       | -2.651520517 | 0.009728901 | 0.036312232      | -2.772144638 |
| HIPK1        | -0.227001906    | 5.021188988        | -2.651530661 | 0.009728634 | 0.036312232      | -3.925219903 |
| CCDC84       | 0.347048911     | 1.165030615        | 2.650930543  | 0.009744456 | 0.036343275      | -3.30653234  |
| RPL5         | 0.12502499      | 9.729726405        | 2.650954757  | 0.009743817 | 0.036343275      | -3.810386668 |
| ZDHHC5       | -0.112136548    | 7.05572994         | -2.651000728 | 0.009742605 | 0.036343275      | -3.946108969 |
| TUSC1        | 0.119826121     | 3.94002048         | 2.650323112  | 0.009760495 | 0.036394083      | -3.799125865 |
| PCOLCE       | 0.169623069     | 9.991099509        | 2.649528144  | 0.009781522 | 0.03646346       | -3.800363939 |
| ZCCHC3       | 0.106137668     | 4.431519196        | 2.648999653  | 0.009795523 | 0.036497505      | -3.868062419 |
| TSPO         | 0.199028751     | 6.878853741        | 2.649080652  | 0.009793376 | 0.036497505      | -3.956363256 |
| TAF15        | 0.100550858     | 6.857626642        | 2.648909126  | 0.009797923 | 0.036497505      | -3.957021341 |
| CDC23        | 0.096061097     | 4.639632315        | 2.648291043  | 0.009814324 | 0.036549563      | -3.900114486 |
| BCAT1        | -0.227590456    | 6.385118629        | -2.647740629 | 0.009828951 | 0.036594988      | -3.961753835 |
| MAMDC4       | 0.227753806     | 0.328867434        | 2.647063865  | 0.009846963 | 0.036625839      | -3.199805862 |
| DUSP10       | 0.223578105     | 3.00009696         | 2.647136519  | 0.009845028 | 0.036625839      | -3.719542719 |
| PSMB3        | 0.176216303     | 5.560442356        | 2.647173569  | 0.009844041 | 0.036625839      | -3.948459304 |
| ARF5         | 0.146012002     | 6.403746508        | 2.647243017  | 0.009842192 | 0.036625839      | -3.96467489  |
| ZNF358       | 0.21594481      | 6.706734372        | 2.646831294  | 0.00985316  | 0.036639841      | -3.965346385 |
| GPN2         | 0.083891431     | 4.233620678        | 2.646521446  | 0.009861421 | 0.03666151       | -3.867470199 |
| YJEFN3       | 0.664607705     | -1.427217239       | 2.646242671  | 0.009868859 | 0.03668011       | -2.946328507 |
| CHMP4B       | 0.110694008     | 6.739273263        | 2.645802153  | 0.009880623 | 0.036714775      | -3.965799539 |
| ZNF107       | -0.215944509    | 1.723255996        | -2.644953115 | 0.009903332 | 0.036781013      | -3.536373479 |
| COTL1        | 0.124868429     | 7.056563987        | 2.644982192  | 0.009902553 | 0.036781013      | -3.960454155 |
| TSTA3        | 0.167774079     | 5.171694333        | 2.64457048   | 0.009913582 | 0.036810006      | -3.934453596 |
| MAP1LC3B2    | 0.27351767      | 0.23752053         | 2.643413557  | 0.009944631 | 0.036908424      | -3.191425399 |
| MRPL21       | 0.187570242     | 4.422098785        | 2.643400302  | 0.009944988 | 0.036908424      | -3.876728476 |

| Gene       | Log fold change | Average Expression | t            | P-value     | Adjusted P-value | B            |
|------------|-----------------|--------------------|--------------|-------------|------------------|--------------|
| IL6ST      | -0.237566402    | 9.469403397        | -2.642956737 | 0.009956916 | 0.036943592      | -3.834167487 |
| CARNMT1    | -0.178704494    | 4.130918238        | -2.642724986 | 0.009963153 | 0.036957632      | -3.878714987 |
| DDX31      | -0.14084946     | 3.49004792         | -2.642196286 | 0.009977396 | 0.037001353      | -3.797529537 |
| LRRC45     | -0.17603788     | 3.566138979        | -2.641697688 | 0.009990845 | 0.037042109      | -3.73660783  |
| DNPH1      | 0.201900755     | 4.397597684        | 2.641375883  | 0.009999534 | 0.037065201      | -3.877438278 |
| TAF6       | 0.099946627     | 5.16132689         | 2.640931873  | 0.010011533 | 0.037100551      | -3.941073302 |
| PHF1       | 0.109705727     | 5.546171839        | 2.640117915  | 0.010033565 | 0.037173052      | -3.96203721  |
| LIPE       | 0.326146168     | -0.087888788       | 2.639629437  | 0.010046808 | 0.037203815      | -3.115835223 |
| OGFR       | -0.138677176    | 5.633646422        | -2.639648154 | 0.010046301 | 0.037203815      | -3.973663525 |
| PLTP       | 0.163655885     | 6.86975571         | 2.639249397  | 0.010057122 | 0.037232856      | -3.980997791 |
| MRPL30     | 0.082238943     | 4.199960718        | 2.639027743  | 0.010063142 | 0.037236841      | -3.877628837 |
| CACNA1C    | -0.256681514    | 4.661911617        | -2.639049549 | 0.01006255  | 0.037236841      | -3.909603548 |
| PDIA5      | 0.111277856     | 5.613986976        | 2.63871063   | 0.010071761 | 0.037259579      | -3.973005992 |
| RTL8A      | 0.173637291     | 5.565297659        | 2.638365585  | 0.010081146 | 0.037285142      | -3.967910072 |
| CEP41      | -0.120067509    | 3.512522471        | -2.637482616 | 0.010105199 | 0.037356087      | -3.757940092 |
| CTTNBP2NL  | -0.226741201    | 5.736615994        | -2.637479348 | 0.010105288 | 0.037356087      | -3.973804872 |
| SPNS2      | 0.679545307     | -2.308335543       | 2.63661709   | 0.010128827 | 0.037424735      | -2.861652658 |
| MTCH1      | 0.115472511     | 8.095319736        | 2.636644299  | 0.010128083 | 0.037424735      | -3.943446956 |
| MTFR1      | 0.092710726     | 4.56430485         | 2.635909915  | 0.010148169 | 0.037487008      | -3.925290807 |
| TMTC2      | -0.33708732     | 3.892060639        | -2.635522476 | 0.01015878  | 0.037517006      | -3.817453737 |
| C11orf63   | -0.183505682    | 2.432765876        | -2.635428709 | 0.01016135  | 0.037517298      | -3.566201147 |
| ZNF675     | -0.199259832    | 1.479333014        | -2.634606236 | 0.010183915 | 0.037591397      | -3.492187759 |
| SCYL2      | -0.169886605    | 5.295305786        | -2.634393329 | 0.010189763 | 0.037603771      | -3.978506142 |
| TCF7       | 0.255855292     | 4.362222623        | 2.634257271  | 0.010193502 | 0.037608357      | -3.921636665 |
| LARP4      | -0.247195136    | 5.145740453        | -2.634066854 | 0.010198737 | 0.037618458      | -3.959172897 |
| COL6A2     | 0.116701296     | 13.2905484         | 2.633837064  | 0.010205058 | 0.037632558      | -3.619105532 |
| HIGD1A     | 0.125976096     | 4.163056836        | 2.633099235  | 0.010225378 | 0.037689036      | -3.890407083 |
| VPS37A     | -0.087885702    | 5.0465653          | -2.633128307 | 0.010224576 | 0.037689036      | -3.958323017 |
| NUP98      | -0.178383202    | 6.661368835        | -2.632530716 | 0.010241059 | 0.037737602      | -3.998069123 |
| MFSD12     | 0.09428725      | 5.325483028        | 2.631229315  | 0.010277039 | 0.037851666      | -3.982666251 |
| FXD5       | 0.227194104     | 7.424559882        | 2.631241075  | 0.010276713 | 0.037851666      | -3.986595274 |
| IPO4       | 0.316672269     | -0.044278138       | 2.630892663  | 0.010286365 | 0.037876753      | -3.17675806  |
| DGCR6L     | 0.196744817     | 4.889428274        | 2.629841378  | 0.010315537 | 0.03797489       | -3.945614843 |
| PEBP1      | 0.148030318     | 8.119112642        | 2.629680772  | 0.01032     | 0.037982039      | -3.958219031 |
| DCAF7      | -0.207780535    | 6.093280689        | -2.629373186 | 0.010328553 | 0.038004231      | -4.008542794 |
| POLL       | 0.13796402      | 4.282545823        | 2.628070866  | 0.010364837 | 0.038128425      | -3.891394607 |
| SH3GLB2    | 0.144762941     | 5.064885424        | 2.627107208  | 0.01039176  | 0.038218132      | -3.97574855  |
| COX6B1     | 0.202338511     | 6.514782531        | 2.626955782  | 0.010395996 | 0.03822438       | -4.014194751 |
| CFAP46     | 0.580676884     | -2.040672239       | 2.626581439  | 0.010406475 | 0.038248012      | -2.901087581 |
| ZNF674-AS1 | -0.344860478    | 0.239611108        | -2.626363543 | 0.01041258  | 0.038248012      | -3.150406767 |
| NPM3       | 0.127806798     | 4.56812767         | 2.62645165   | 0.010410111 | 0.038248012      | -3.935501818 |
| SLK        | -0.2572839      | 6.537911526        | -2.626431114 | 0.010410686 | 0.038248012      | -4.01401942  |
| ERVK3-1    | 0.268242715     | 0.905285905        | 2.625990315  | 0.010423043 | 0.038267252      | -3.35214174  |
| PXMP2      | 0.198470827     | 1.467776198        | 2.626036213  | 0.010421756 | 0.038267252      | -3.45621117  |
| ARSI       | 0.252212271     | 1.443051012        | 2.62585275   | 0.010426902 | 0.038267252      | -3.506821156 |
| LEPR       | -0.247040874    | 3.238149592        | -2.625814372 | 0.010427979 | 0.038267252      | -3.807035437 |
| EIF3G      | 0.154348312     | 7.591062936        | 2.625714258  | 0.010430788 | 0.03826824       | -3.993655142 |
| KRT18      | 0.626584817     | -1.208740364       | 2.625245258  | 0.010443959 | 0.03830723       | -2.971550962 |
| ZNF221     | -0.404298477    | -0.568697559       | -2.624103754 | 0.010476078 | 0.038402634      | -3.219881519 |
| CD44       | -0.127129196    | 10.06345768        | -2.624137862 | 0.010475117 | 0.038402634      | -3.85444115  |
| DERL1      | -0.097773404    | 6.010397917        | -2.624049127 | 0.010477617 | 0.038402634      | -4.017462793 |
| GPS1       | 0.155265116     | 6.124256528        | 2.623356858  | 0.010497142 | 0.038464838      | -4.019978748 |
| CALR       | 0.100181583     | 9.73151435         | 2.622714405  | 0.010515292 | 0.038521973      | -3.872246389 |
| TIMM21     | 0.139432541     | 3.595499672        | 2.62217037   | 0.010530683 | 0.038568979      | -3.836878631 |
| ATP2C1     | -0.115850305    | 6.942124996        | -2.621991892 | 0.010535737 | 0.038578109      | -4.019752144 |
| SWAP70     | -0.192467719    | 7.131390782        | -2.621847029 | 0.010539841 | 0.038583756      | -4.020516122 |
| CCDC130    | 0.184854994     | 3.300791651        | 2.621574996  | 0.01054755  | 0.038602599      | -3.804780286 |
| THTPA      | 0.171346152     | 2.226616528        | 2.621328137  | 0.010554551 | 0.038618839      | -3.613735106 |
| RANBP6     | -0.200934775    | 4.279284678        | -2.620804153 | 0.010569425 | 0.038663871      | -3.936661759 |
| ZCWPW1     | -0.166522321    | 2.757426913        | -2.620661926 | 0.010573466 | 0.038669262      | -3.688303708 |
| SLC39A8    | -0.161644262    | 6.191259184        | -2.62013154  | 0.010588546 | 0.038715014      | -4.03220145  |
| ZNF101     | -0.200915075    | 1.334846743        | -2.619668363 | 0.010601731 | 0.038734977      | -3.505986519 |
| NMB        | 0.258313962     | 3.263992213        | 2.619578493  | 0.010604291 | 0.038734977      | -3.804232631 |
| ITPR2      | -0.310386911    | 4.082860536        | -2.619721317 | 0.010600223 | 0.038734977      | -3.915958092 |
| PCYT2      | 0.123674539     | 6.175663073        | 2.619660331  | 0.01060196  | 0.038734977      | -4.0310736   |
| CCDC124    | 0.2056157       | 5.74720605         | 2.619471298  | 0.010607346 | 0.038736741      | -4.019091231 |
| MYO10      | -0.232498056    | 6.285132718        | -2.619052922 | 0.010619274 | 0.038770903      | -4.032045779 |
| PTCH1      | -0.296203855    | 2.246800279        | -2.618763356 | 0.010627537 | 0.038791669      | -3.663215809 |
| PLK4       | -0.311829557    | 1.22523945         | -2.618430804 | 0.010637034 | 0.038811274      | -3.419105968 |
| MAU2       | 0.099368412     | 4.89619244         | 2.618394855  | 0.010638061 | 0.038811274      | -3.9862164   |

| Gene         | Log fold change | Average Expression | t            | P-value     | Adjusted P-value | B            |
|--------------|-----------------|--------------------|--------------|-------------|------------------|--------------|
| PROSER2      | 0.337159961     | 0.948317089        | 2.618164042  | 0.010644658 | 0.038816539      | -3.311899707 |
| MRPL16       | 0.166587384     | 4.337899454        | 2.618215176  | 0.010643196 | 0.038816539      | -3.930602964 |
| ANK2         | -0.196956358    | 6.817270048        | -2.617683577 | 0.010658401 | 0.038857249      | -4.035185649 |
| CACHD1       | -0.348654863    | 4.233920405        | -2.617551579 | 0.01066218  | 0.03886162       | -3.910965595 |
| MAFG-AS1     | 0.203520608     | 2.497132719        | 2.617385767  | 0.010666928 | 0.038869521      | -3.663483784 |
| CCDC82       | -0.143015251    | 3.901666129        | -2.617169723 | 0.010673117 | 0.03888267       | -3.90316365  |
| MRPL48       | 0.144661797     | 4.089239304        | 2.616178739  | 0.01070155  | 0.038976826      | -3.909452003 |
| GPR153       | 0.10813089      | 6.672479104        | 2.615591691  | 0.010718426 | 0.039028854      | -4.038409578 |
| PEG3         | 0.518506112     | -0.671997394       | 2.615208094  | 0.010729466 | 0.039059613      | -3.108194856 |
| GPANK1       | 0.100449916     | 3.942276909        | 2.615010428  | 0.010735159 | 0.039070895      | -3.933776619 |
| ZIK1         | -0.180217979    | 1.930102826        | -2.613282689 | 0.010785036 | 0.039242944      | -3.601186058 |
| NTHL1        | 0.251263273     | 2.826580217        | 2.612319909  | 0.010812921 | 0.03932541       | -3.702755581 |
| PIGN         | -0.271784158    | 4.108350041        | -2.612396472 | 0.010810702 | 0.03932541       | -3.941252523 |
| RPS7         | 0.171055412     | 6.3775648          | 2.611600367  | 0.010833804 | 0.039391848      | -4.051177295 |
| CARS         | -0.128335634    | 6.15774437         | -2.611082687 | 0.010848851 | 0.03943704       | -4.047027981 |
| DRP2         | -0.52875623     | -1.186545344       | -2.610512576 | 0.010865444 | 0.039440252      | -3.00682046  |
| NBEAL2       | -0.225857193    | 1.383945495        | -2.610625548 | 0.010862154 | 0.039440252      | -3.447256709 |
| MLKL         | 0.17161153      | 2.938903918        | 2.610574203  | 0.010863649 | 0.039440252      | -3.73427568  |
| MBD5         | -0.222900201    | 3.465421716        | -2.610600964 | 0.01086287  | 0.039440252      | -3.792663186 |
| RPL36        | 0.20350813      | 8.769018799        | 2.610939101  | 0.010853028 | 0.039440252      | -3.969932237 |
| ZFYVE16      | -0.21819297     | 5.054465212        | -2.610654721 | 0.010861305 | 0.039440252      | -4.016077064 |
| UVSSA        | -0.324399633    | 1.531044884        | -2.610121262 | 0.010876846 | 0.03947213       | -3.455811145 |
| BRK1         | 0.096030816     | 7.37565603         | 2.609504816  | 0.01089483  | 0.039527872      | -4.039186655 |
| PIGO         | -0.165847442    | 3.813312998        | -2.607855055 | 0.010943093 | 0.039683861      | -3.894398071 |
| MAST2        | -0.101473997    | 6.036414366        | -2.607909552 | 0.010941496 | 0.039683861      | -4.052245146 |
| TPRA1        | 0.113416358     | 5.038765604        | 2.607320135  | 0.010958784 | 0.039731196      | -4.019689501 |
| LMF2         | 0.122153481     | 6.882325409        | 2.606946982  | 0.010969741 | 0.039761353      | -4.059683792 |
| RAB40B       | 0.126746801     | 3.744506563        | 2.606493624  | 0.010983067 | 0.039800078      | -3.913720528 |
| TTC9B        | -0.799167517    | -2.85574683        | -2.606373333 | 0.010986606 | 0.039803325      | -2.813286731 |
| CCDC136      | -0.163633903    | 2.191747924        | -2.604925165 | 0.011029284 | 0.039948336      | -3.628426962 |
| POLR1C       | -0.208792076    | 3.869990066        | -2.604591917 | 0.011039126 | 0.039974373      | -3.910759566 |
| ETNK2        | 0.204450385     | 1.458483586        | 2.603950853  | 0.011058082 | 0.040033391      | -3.528449652 |
| ZNF71        | -0.151826015    | 2.979323064        | -2.603829778 | 0.011061665 | 0.040036742      | -3.82870773  |
| POLD2        | 0.130506583     | 6.539453317        | 2.603299474  | 0.011077372 | 0.040083963      | -4.071567852 |
| ATP5G1       | 0.153890613     | 4.489905174        | 2.603148763  | 0.01108184  | 0.0400905        | -3.982403323 |
| MRPL22       | 0.183329499     | 3.836040438        | 2.602509541  | 0.011100808 | 0.040139838      | -3.913666906 |
| RNF185       | -0.080761972    | 5.500636236        | -2.602587417 | 0.011098495 | 0.040139838      | -4.056160165 |
| ZNF845       | -0.200168936    | 2.418996062        | -2.602328716 | 0.011106178 | 0.040139988      | -3.746009705 |
| RASSF1       | 0.137526897     | 4.18009197         | 2.602349669  | 0.011105556 | 0.040139988      | -3.959416769 |
| XPO4         | -0.245399767    | 4.148267055        | -2.601858146 | 0.011120166 | 0.040180903      | -3.971651009 |
| LOC101928865 | -0.8074228      | -4.883449387       | -2.601303305 | 0.01113668  | 0.040211636      | -2.779375767 |
| UHRF1BP1     | -0.271205066    | 3.357074721        | -2.60136476  | 0.01113485  | 0.040211636      | -3.860019593 |
| TECR         | 0.153918503     | 5.432087656        | 2.601371679  | 0.011134644 | 0.040211636      | -4.05246138  |
| ARPC5        | -0.101121764    | 7.008936216        | -2.601027844 | 0.011144886 | 0.040231625      | -4.066451387 |
| CCNO         | 0.501733943     | -1.486947403       | 2.600679368  | 0.011155276 | 0.040259483      | -3.026680754 |
| DCTN2        | 0.092227452     | 7.630401797        | 2.600465953  | 0.011161643 | 0.040272814      | -4.053180597 |
| MCMDC2       | -0.265543847    | -0.023733078       | -2.600271307 | 0.011167454 | 0.040284129      | -3.225549827 |
| LSM7         | 0.176475592     | 4.432170074        | 2.599086949  | 0.011202866 | 0.040402195      | -3.990898464 |
| KCTD2        | -0.086662124    | 5.520536308        | -2.598834164 | 0.011210437 | 0.040419824      | -4.073175797 |
| MRPS6        | 0.133840886     | 4.812155419        | 2.598308024  | 0.011226211 | 0.040467011      | -4.022293631 |
| MFSD2B       | 0.707616741     | -2.302170041       | 2.597498639  | 0.011250516 | 0.040542905      | -2.931895586 |
| RMDN3        | 0.080109778     | 4.790829481        | 2.597427707  | 0.011252648 | 0.040542905      | -4.023641264 |
| C1QTNF1      | 0.192833431     | 3.428942222        | 2.59646411   | 0.01128165  | 0.040637681      | -3.884119276 |
| BTBD2        | 0.148207281     | 7.752510379        | 2.596334961  | 0.011285543 | 0.040641983      | -4.05999701  |
| EIF5AL1      | 0.313711752     | 1.024538304        | 2.59578475   | 0.011302139 | 0.040672579      | -3.447017035 |
| GRN          | 0.102589311     | 9.820964147        | 2.595789951  | 0.011301982 | 0.040672579      | -3.937930711 |
| MSANTD4      | -0.131873679    | 4.591236125        | -2.595802423 | 0.011301605 | 0.040672579      | -4.025503409 |
| KCNB1        | 0.387930571     | 1.59786816         | 2.594591719  | 0.0113382   | 0.040773129      | -3.632391589 |
| PSMG1        | 0.1459884       | 5.003452083        | 2.594713878  | 0.011334502 | 0.040773129      | -4.051141281 |
| FOXJ2        | -0.226671903    | 5.101670683        | -2.594613357 | 0.011337545 | 0.040773129      | -4.066083082 |
| URI1         | -0.089483081    | 6.240158166        | -2.59431687  | 0.011346522 | 0.040793319      | -4.092701759 |
| TRIM27       | -0.104564191    | 5.648169855        | -2.594168643 | 0.011351013 | 0.040799727      | -4.088379575 |
| PIK3IP1      | 0.14625901      | 4.790847669        | 2.593823483  | 0.011361476 | 0.040827593      | -4.056864204 |
| SPCS2        | 0.107507271     | 3.832361087        | 2.593715072  | 0.011364764 | 0.040829669      | -3.941262955 |
| NOC3L        | -0.163088459    | 3.951497273        | -2.593298672 | 0.011377401 | 0.040865325      | -4.010410804 |
| TRAPPC1      | 0.188586744     | 5.91289207         | 2.592504099  | 0.011401551 | 0.040942305      | -4.089101056 |
| CDCA5        | -0.210028453    | 2.44591877         | -2.592364757 | 0.011405791 | 0.040947769      | -3.737479629 |
| IGFBP6       | 0.247859802     | 8.281466186        | 2.591819558  | 0.011422394 | 0.040996032      | -4.043150842 |
| ENTPD4       | -0.157601002    | 5.151523317        | -2.591744641 | 0.011424678 | 0.040996032      | -4.071282569 |
| CPN2         | 0.579505208     | -2.083185622       | 2.591410896  | 0.011434854 | 0.041022777      | -2.995322123 |

| Gene         | Log fold change | Average Expression | t            | P-value     | Adjusted P-value | B            |
|--------------|-----------------|--------------------|--------------|-------------|------------------|--------------|
| HIBCH        | -0.116347221    | 3.843567779        | -2.59105985  | 0.011445567 | 0.041051432      | -3.924177716 |
| RDH10-AS1    | 0.994716343     | -4.229011684       | 2.590112077  | 0.011474535 | 0.041104235      | -2.827478352 |
| ARMC4        | -0.396271252    | 0.269658317        | -2.590069048 | 0.011475851 | 0.041104235      | -3.237263799 |
| ZNF784       | 0.171995986     | 2.512503942        | 2.590098512  | 0.01147495  | 0.041104235      | -3.689188061 |
| TRIM13       | -0.113224692    | 4.576769283        | -2.589953459 | 0.011479389 | 0.041104235      | -4.041539146 |
| RAB4A        | 0.071648441     | 5.272980987        | 2.590054319  | 0.011476302 | 0.041104235      | -4.075254601 |
| CBR1         | 0.182799065     | 5.715188035        | 2.590396849  | 0.011465824 | 0.041104235      | -4.091287744 |
| RNF145       | -0.194219386    | 5.673633291        | -2.589969576 | 0.011478896 | 0.041104235      | -4.098977563 |
| RBMX         | -0.080812522    | 6.323829238        | -2.589780488 | 0.011484685 | 0.041113425      | -4.103753548 |
| UBE2D1       | -0.098721081    | 5.291665848        | -2.589264739 | 0.011500489 | 0.04116022       | -4.079403976 |
| PTGER3       | -0.457934868    | 2.443080773        | -2.588872658 | 0.011512517 | 0.041186642      | -3.710527264 |
| NDUFB10      | 0.195114445     | 5.950590586        | 2.588845832  | 0.01151334  | 0.041186642      | -4.099018055 |
| NAP1L1       | 0.071884009     | 9.258497315        | 2.588625923  | 0.011520091 | 0.04120101       | -3.987854627 |
| CLTB         | 0.18706632      | 6.02340573         | 2.588365909  | 0.011528079 | 0.04121979       | -4.103148717 |
| FUT4         | -0.131721806    | 2.953472036        | -2.587791195 | 0.011545751 | 0.041273182      | -3.798195284 |
| ARF3         | 0.059730909     | 7.000143237        | 2.587038118  | 0.011568945 | 0.041346284      | -4.102509028 |
| ZNF627       | -0.156362703    | 3.247464017        | -2.586483367 | 0.011586058 | 0.041386491      | -3.897113516 |
| TDP2         | 0.082504283     | 5.081066421        | 2.586406276  | 0.011588437 | 0.041386491      | -4.073497655 |
| VTA1         | -0.065109322    | 5.782619961        | -2.5865133   | 0.011585134 | 0.041386491      | -4.102769934 |
| CCDC74A      | 0.176191823     | 3.22582909         | 2.582912543  | 0.011696758 | 0.041763442      | -3.879844682 |
| SLC26A2      | -0.269882499    | 4.756499184        | -2.582815763 | 0.011699771 | 0.041764302      | -4.076498638 |
| HP1BP3       | -0.147985857    | 7.15547024         | -2.582647178 | 0.011705023 | 0.041773149      | -4.097947751 |
| PGGT1B       | -0.161922163    | 3.289454566        | -2.581708654 | 0.011734295 | 0.041867698      | -3.884217204 |
| RPF1         | -0.108073263    | 4.384927498        | -2.58107606  | 0.011754063 | 0.041928298      | -4.035240054 |
| NCAPG        | -0.267077286    | 2.396593345        | -2.580875706 | 0.01176033  | 0.04192841       | -3.741945446 |
| PPIA         | 0.12475729      | 6.187815449        | 2.580928041  | 0.011758693 | 0.04192841       | -4.124853122 |
| RAB18        | -0.077327941    | 6.441823098        | -2.580808137 | 0.011762444 | 0.04192841       | -4.125416632 |
| LOC100506688 | -0.844583505    | -4.49946382        | -2.580131204 | 0.011783645 | 0.041975633      | -2.832106485 |
| SPRYD4       | 0.169386781     | 2.690349339        | 2.579685347  | 0.011797627 | 0.041975633      | -3.793565791 |
| IGIP         | 0.195610409     | 3.487007047        | 2.580114654  | 0.011784164 | 0.041975633      | -3.952046038 |
| UBA52        | 0.171769459     | 9.21063427         | 2.579874307  | 0.011791699 | 0.041975633      | -4.018503999 |
| CLPP         | 0.194960135     | 5.109685568        | 2.579896558  | 0.011791002 | 0.041975633      | -4.080934082 |
| TMEM87A      | -0.101741482    | 5.537191058        | -2.579734401 | 0.011796088 | 0.041975633      | -4.110493068 |
| SNX17        | 0.094099861     | 7.333446678        | 2.58014589   | 0.011783185 | 0.041975633      | -4.111769979 |
| ARHGAP31     | -0.201720587    | 5.436060015        | -2.579673976 | 0.011797984 | 0.041975633      | -4.114814744 |
| CTC1         | 0.140214092     | 2.69420865         | 2.579117757  | 0.011815449 | 0.042027845      | -3.767014593 |
| PAFAH2       | 0.148254299     | 3.022976839        | 2.5785082    | 0.011834616 | 0.042069641      | -3.847929396 |
| FADS3        | 0.151723449     | 5.010073294        | 2.578477636  | 0.011835577 | 0.042069641      | -4.087733476 |
| UQCR10       | 0.167944392     | 5.268442553        | 2.578600642  | 0.011831707 | 0.042069641      | -4.094673069 |
| VPS53        | 0.085969697     | 5.168958353        | 2.577985601  | 0.01185107  | 0.042114773      | -4.107159982 |
| KIRREL       | -0.340972412    | 7.375393847        | -2.577660086 | 0.01186133  | 0.042141291      | -4.109399808 |
| CCDC122      | -0.254242228    | 1.005425036        | -2.577565699 | 0.011864306 | 0.042141927      | -3.408951451 |
| AES          | 0.122309137     | 7.556180558        | 2.577316521  | 0.011872167 | 0.042159907      | -4.111199447 |
| KLF15        | -0.330461841    | 1.261396025        | -2.576677401 | 0.011892351 | 0.042212863      | -3.369805974 |
| FBXO18       | -0.062419373    | 6.084524858        | -2.576666873 | 0.011892684 | 0.042212863      | -4.131693197 |
| ARIH2        | -0.140528836    | 5.490245573        | -2.576304705 | 0.011904136 | 0.042233608      | -4.119849565 |
| APOL6        | -0.143661698    | 6.030459816        | -2.576323121 | 0.011903553 | 0.042233608      | -4.131484278 |
| LOC148413    | 0.163954622     | 2.639567297        | 2.575742979  | 0.011921917 | 0.042286734      | -3.870491905 |
| IFITM3       | 0.192238773     | 9.165639612        | 2.575320101  | 0.011935319 | 0.042324305      | -4.033562723 |
| RHOT2        | 0.135392888     | 4.541572692        | 2.574807641  | 0.011951578 | 0.042352053      | -4.0557276   |
| CLIP3        | 0.169169248     | 7.815117032        | 2.574878558  | 0.011949327 | 0.042352053      | -4.10745962  |
| DPY19L4      | -0.243821249    | 5.165108758        | -2.574858016 | 0.011949979 | 0.042352053      | -4.11294319  |
| MAPK8        | -0.111439938    | 3.963004281        | -2.574494034 | 0.011961538 | 0.042367414      | -3.994293922 |
| FAM222B      | -0.107285189    | 4.066181935        | -2.574506654 | 0.011961137 | 0.042367414      | -4.036549165 |
| IGFBP4       | 0.134061472     | 10.86267061        | 2.573667296  | 0.011987831 | 0.042450561      | -3.92086897  |
| VDAC3        | 0.098271392     | 5.922932793        | 2.573455622  | 0.011994571 | 0.042454469      | -4.136541553 |
| PTPRK        | -0.258140393    | 6.100313097        | -2.573517103 | 0.011992613 | 0.042454469      | -4.141790358 |
| GLRX         | -0.19230367     | 4.885567713        | -2.573168584 | 0.012003717 | 0.04246267       | -4.069685989 |
| SLC35C1      | -0.077584383    | 5.621359918        | -2.573117511 | 0.012005345 | 0.04246267       | -4.128866336 |
| CETN2        | 0.123963444     | 6.15493909         | 2.57314271   | 0.012004541 | 0.04246267       | -4.142400607 |
| VPS11        | 0.073146551     | 5.905180366        | 2.57282463   | 0.012014684 | 0.042485728      | -4.137916218 |
| OTUD7B       | -0.252118968    | 4.921651664        | -2.571921749 | 0.012043516 | 0.042558163      | -4.107895926 |
| MED13        | -0.323904087    | 5.651176333        | -2.571917762 | 0.012043644 | 0.042558163      | -4.136954414 |
| GLMP         | 0.08948665      | 6.239489648        | 2.572012644  | 0.012040611 | 0.042558163      | -4.146108268 |
| MFAP2        | 0.110296242     | 7.0229039          | 2.571828944  | 0.012046483 | 0.042558214      | -4.139923622 |
| CACNA2D1     | -0.30733038     | 4.693080875        | -2.571250457 | 0.012064993 | 0.042613613      | -4.098484588 |
| TIMM50       | 0.084996007     | 5.482383559        | 2.57082912   | 0.012078491 | 0.042651288      | -4.131782562 |
| LRRRC34      | -0.226692978    | 0.552354786        | -2.570515454 | 0.012088549 | 0.042676798      | -3.387346376 |
| SERINC3      | -0.107269146    | 7.352570452        | -2.57005875  | 0.012103206 | 0.042718532      | -4.130449602 |
| SEMA3G       | -0.700619778    | -2.829419254       | -2.569779013 | 0.012112192 | 0.042740234      | -2.974400808 |

| Gene      | Log fold change | Average Expression | t            | P-value     | Adjusted P-value | B            |
|-----------|-----------------|--------------------|--------------|-------------|------------------|--------------|
| ZNF25     | -0.135252133    | 3.442108039        | -2.568922304 | 0.012139749 | 0.042827441      | -3.943544822 |
| CTNNA1    | 0.063421145     | 8.574290467        | 2.568705961  | 0.012146716 | 0.042840219      | -4.072121028 |
| RAD23B    | -0.071492248    | 7.968297492        | -2.568633268 | 0.012149058 | 0.042840219      | -4.108006415 |
| NCAPH2    | 0.134628851     | 4.762118974        | 2.56814152   | 0.012164912 | 0.042886085      | -4.093485227 |
| ZMPSTE24  | -0.130598162    | 6.665082375        | -2.567286261 | 0.012192531 | 0.042973393      | -4.156129128 |
| PDXP      | -0.416722641    | -1.343034526       | -2.566139997 | 0.012229635 | 0.043073935      | -3.133301208 |
| RAB29     | -0.101478988    | 5.312299533        | -2.566157853 | 0.012229056 | 0.043073935      | -4.124989144 |
| BMPER     | -0.226052608    | 5.999203168        | -2.566194345 | 0.012227873 | 0.043073935      | -4.156990015 |
| SGO1      | -0.428400491    | -0.79043992        | -2.565910532 | 0.012237075 | 0.043090064      | -3.197106103 |
| TLK2      | -0.11414626     | 4.02110149         | -2.565734488 | 0.012242786 | 0.043099186      | -4.040668747 |
| DVL1      | 0.123959654     | 5.613867365        | 2.565654308  | 0.012245387 | 0.043099186      | -4.14218197  |
| RPL8      | 0.168722318     | 10.40382548        | 2.565488455  | 0.012250771 | 0.043108061      | -3.977582473 |
| SIPA1L3   | 0.15251436      | 4.251695845        | 2.565348915  | 0.012255301 | 0.043113933      | -4.065273762 |
| METRNL    | 0.172764753     | 5.39158978         | 2.564616117  | 0.01227912  | 0.043187642      | -4.139405137 |
| PHC3      | -0.279612784    | 4.593671349        | -2.563802458 | 0.012305617 | 0.043270731      | -4.107722952 |
| GABRB2    | -0.903406055    | -4.423876029       | -2.5636049   | 0.012312058 | 0.043283276      | -2.872184688 |
| HINT1     | 0.152561507     | 6.903215574        | 2.563140487  | 0.012327211 | 0.043326438      | -4.163589987 |
| ITSN1     | -0.195732866    | 5.667732137        | -2.562623785 | 0.012344091 | 0.043375644      | -4.15721772  |
| IL18R1    | -0.221806757    | 2.705082479        | -2.562336371 | 0.012353489 | 0.043398545      | -3.83931101  |
| STRN      | -0.230890208    | 5.105904863        | -2.561874741 | 0.012368598 | 0.043441491      | -4.144817059 |
| IER3      | 0.298468814     | 4.82627109         | 2.561692106  | 0.01237458  | 0.04345237       | -4.033058025 |
| TMEM192   | -0.189288894    | 4.468372649        | -2.561600856 | 0.012377569 | 0.04345274       | -4.090989836 |
| STK32C    | 0.188903527     | 3.431267426        | 2.561292689  | 0.012387671 | 0.043478071      | -3.945714152 |
| LINC00641 | -0.310368824    | 1.937020656        | -2.560605366 | 0.012410229 | 0.043539309      | -3.725192309 |
| TTL5      | -0.100331378    | 4.577309846        | -2.56042436  | 0.012416175 | 0.043539309      | -4.085347348 |
| PRAF2     | 0.177067269     | 4.728969012        | 2.560422526  | 0.012416236 | 0.043539309      | -4.105714835 |
| MMADHC    | 0.073808085     | 6.259991482        | 2.560408989  | 0.01241668  | 0.043539309      | -4.172272288 |
| KIF6      | -0.317807835    | 0.30092187         | -2.560254507 | 0.012421758 | 0.043546977      | -3.345015237 |
| NUP160    | -0.15431818     | 5.196145969        | -2.560038902 | 0.012428847 | 0.04355156       | -4.146100772 |
| GNAI3     | -0.182070878    | 6.910862739        | -2.56004053  | 0.012428794 | 0.04355156       | -4.167653267 |
| EPHA1     | -0.511937443    | -1.177629273       | -2.559472654 | 0.012447484 | 0.043606722      | -3.120922475 |
| GLUD1     | 0.079352516     | 6.822119824        | 2.558926543  | 0.012465482 | 0.043649471      | -4.173950171 |
| UTRN      | -0.330230448    | 6.621552068        | -2.558966089 | 0.012464178 | 0.043649471      | -4.174327653 |
| CRACR2A   | -0.171784511    | 2.118708557        | -2.558650076 | 0.012474603 | 0.043671256      | -3.754058121 |
| ZNF311    | 0.456723481     | -0.661301942       | 2.558402361  | 0.01248278  | 0.04367958       | -3.247532118 |
| SNX4      | -0.126917882    | 4.15356101         | -2.558411236 | 0.012482487 | 0.04367958       | -4.068317989 |
| IMP4      | 0.106616351     | 5.325369401        | 2.557883147  | 0.012499935 | 0.04372945       | -4.160367705 |
| LMCD1-AS1 | -0.422726606    | -1.909489508       | -2.557522571 | 0.01251186  | 0.043730549      | -3.055316106 |
| CEBPG     | -0.171335882    | 4.967368268        | -2.557620261 | 0.012508628 | 0.043730549      | -4.091402824 |
| ZNF213    | 0.129563604     | 4.585731165        | 2.557724513  | 0.01250518  | 0.043730549      | -4.114504438 |
| KIAA1217  | -0.187038538    | 4.971694137        | -2.55757625  | 0.012510084 | 0.043730549      | -4.137740139 |
| PLAC9P1   | 0.630921736     | -2.279314534       | 2.557089416  | 0.012526201 | 0.043770514      | -3.019241482 |
| THAP6     | 0.155733756     | 2.711114022        | 2.556954223  | 0.012530679 | 0.043776009      | -3.85958534  |
| PKIA      | 0.17188504      | 2.611278688        | 2.55673984   | 0.012537784 | 0.043790676      | -3.822442791 |
| ZNF160    | -0.187411948    | 4.132474462        | -2.556581091 | 0.012543048 | 0.043798905      | -4.090584875 |
| MX1       | 0.284257569     | 4.896320685        | 2.55673478   | 0.01257318  | 0.043883778      | -4.142644295 |
| SRSF1     | -0.0578601      | 6.552949731        | -2.55570302  | 0.012572198 | 0.043883778      | -4.18452557  |
| SETX      | -0.279278866    | 6.87172435         | -2.555434154 | 0.012581137 | 0.043901376      | -4.177478305 |
| NT5C      | 0.202718035     | 3.082237805        | 2.554903764  | 0.012598785 | 0.04395278       | -3.911656808 |
| PRDX3     | 0.059998479     | 6.452079505        | 2.554480023  | 0.012612902 | 0.043991838      | -4.188414203 |
| PQLC1     | 0.099873557     | 5.9571085          | 2.553788049  | 0.012635984 | 0.044062145      | -4.185874958 |
| MSRA      | 0.118486902     | 3.584022705        | 2.553055449  | 0.012660463 | 0.044137288      | -4.012843921 |
| SCLT1     | -0.142297094    | 2.588704384        | -2.552863683 | 0.012666878 | 0.044149434      | -3.79846083  |
| ST3GAL5   | -0.151097832    | 4.973827767        | -2.552673802 | 0.012673233 | 0.044151152      | -4.153396526 |
| TOP1      | -0.171913446    | 6.21002974         | -2.552751174 | 0.012670643 | 0.044151152      | -4.191784441 |
| CEMIP     | -0.530008681    | 8.931976953        | -2.55192621  | 0.01269828  | 0.044228183      | -4.070818447 |
| CCDC8     | -0.16363176     | 5.829093424        | -2.551645412 | 0.012707699 | 0.044250759      | -4.193783425 |
| FAR1      | -0.164225595    | 5.274114226        | -2.551261603 | 0.012720584 | 0.04428539       | -4.175969943 |
| LCAT      | 0.392713009     | 1.53497235         | 2.550654822  | 0.012740979 | 0.044346143      | -3.658186317 |
| LMO2      | 0.290218058     | 1.464042662        | 2.550216373  | 0.012755734 | 0.044387243      | -3.654868862 |
| REEP6     | 0.188794075     | 2.35526386         | 2.549847131  | 0.012768172 | 0.04441645       | -3.789547895 |
| CCDC149   | -0.087746121    | 4.969666061        | -2.549777678 | 0.012770513 | 0.04441645       | -4.153449113 |
| MYO18A    | 0.190843706     | 5.548280822        | 2.549529807  | 0.01277887  | 0.04441645       | -4.177728866 |
| UBL7      | 0.149876827     | 5.555766562        | 2.549570303  | 0.012777504 | 0.04441645       | -4.178588625 |
| TRAF7     | 0.075646514     | 7.24958236         | 2.549675048  | 0.012773972 | 0.04441645       | -4.187376266 |
| NPC2      | 0.139980924     | 7.741656996        | 2.549045473  | 0.012795214 | 0.044462999      | -4.16968922  |
| CNIH2     | 0.481968133     | -1.616298323       | 2.548063841  | 0.012828397 | 0.044568028      | -3.115416719 |
| METTL5    | 0.176649441     | 4.027946955        | 2.547965075  | 0.01283174  | 0.044569363      | -4.037267746 |
| C16orf72  | -0.213863795    | 5.69253131         | -2.547858645 | 0.012835343 | 0.044571602      | -4.189383815 |
| HES4      | 0.545450585     | -1.997259102       | 2.547077448  | 0.012861819 | 0.044644878      | -3.073831268 |

| Gene         | Log fold change | Average Expression | t            | P-value     | Adjusted P-value | B            |
|--------------|-----------------|--------------------|--------------|-------------|------------------|--------------|
| ENPP4        | -0.398397024    | 1.289159491        | -2.547061149 | 0.012862372 | 0.044644878      | -3.612820036 |
| PEX26        | -0.083243957    | 5.514784116        | -2.546839553 | 0.012869891 | 0.044660688      | -4.190829244 |
| LYPLA1       | -0.1851503      | 3.990534636        | -2.546153494 | 0.012893197 | 0.044731257      | -4.082052171 |
| STAT3        | -0.178950786    | 7.741881238        | -2.545909797 | 0.012901484 | 0.044749703      | -4.164395305 |
| PIP5K1A      | -0.19995231     | 5.240849492        | -2.544977035 | 0.01293325  | 0.044849557      | -4.158173749 |
| ORMDL3       | 0.093502523     | 5.378545878        | 2.544705034  | 0.012942526 | 0.044871395      | -4.187522781 |
| CTGF         | -0.313988346    | 8.199047148        | -2.543496219 | 0.012983824 | 0.045004217      | -4.200887659 |
| TIMM17B      | 0.209863487     | 3.43209582         | 2.543402679  | 0.012987025 | 0.045004955      | -3.983782232 |
| MAVS         | -0.156301732    | 6.665097431        | -2.54297941  | 0.013001517 | 0.045044813      | -4.214574463 |
| CSNK1E       | -0.08634708     | 6.081231438        | -2.542849178 | 0.013005978 | 0.04504991       | -4.211841315 |
| UGDH-AS1     | -0.331562197    | -0.385261103       | -2.54244297  | 0.013019904 | 0.045056434      | -3.286314402 |
| HDAC10       | 0.355051744     | -0.315759785       | 2.542336916  | 0.013023542 | 0.045056434      | -3.327147875 |
| CPEB1        | 0.173168964     | 2.935544899        | 2.542572954  | 0.013015447 | 0.045056434      | -3.990789927 |
| PRR14L       | -0.22481972     | 4.074871247        | -2.542270879 | 0.013025808 | 0.045056434      | -4.122744228 |
| ANXA7        | 0.085914501     | 7.115400192        | 2.542438705  | 0.01302005  | 0.045056434      | -4.205464851 |
| ZNHIT1       | 0.194204059     | 5.977872459        | 2.54242097   | 0.013020659 | 0.045056434      | -4.210041411 |
| LSM2         | 0.163097246     | 4.851623286        | 2.542151625  | 0.0130299   | 0.045060243      | -4.147241833 |
| C17orf53     | 0.199836551     | 1.180980984        | 2.541692653  | 0.013045662 | 0.045104396      | -3.67086173  |
| PRPF38B      | -0.160694563    | 4.779239809        | -2.5413227   | 0.013058379 | 0.045138005      | -4.169668504 |
| NUDT6        | 0.278215417     | -0.065298233       | 2.540518581  | 0.01308606  | 0.045223308      | -3.368310257 |
| FAM126B      | -0.183326132    | 2.705849189        | -2.539583786 | 0.013118305 | 0.045324344      | -3.950299651 |
| RPL24        | 0.183448445     | 8.100812332        | 2.538849617  | 0.013143679 | 0.045401602      | -4.177911932 |
| PPA1         | 0.109931866     | 6.329201697        | 2.538141144  | 0.013168208 | 0.045475903      | -4.227029453 |
| ZFAND2A      | 0.224141956     | 2.904871642        | 2.537992675  | 0.013173354 | 0.045483245      | -3.929457266 |
| B3GNTL1      | 0.276532176     | 0.830696412        | 2.537705651  | 0.013183306 | 0.045507178      | -3.521305909 |
| CARNS1       | 0.640558037     | -2.124066966       | 2.537497243  | 0.013190537 | 0.045521706      | -3.106940836 |
| SURF6        | -0.114800058    | 4.954363541        | -2.537094144 | 0.013204533 | 0.04555957       | -4.198647773 |
| DEK          | -0.155451697    | 6.732746294        | -2.53699127  | 0.013208107 | 0.045561465      | -4.225802574 |
| VLDLR        | -0.199288054    | 3.72814129         | -2.536865797 | 0.013212467 | 0.045566072      | -4.059358905 |
| NICN1        | -0.15585006     | 3.400249789        | -2.536306845 | 0.013231907 | 0.045622669      | -4.024660191 |
| DHX34        | -0.131475842    | 3.673246655        | -2.536165474 | 0.013236828 | 0.045629192      | -4.066402857 |
| ZNF253       | -0.195533021    | 1.851385379        | -2.535504823 | 0.013259845 | 0.04567891       | -3.878041511 |
| MAP4         | 0.086700146     | 9.383899055        | 2.535664107  | 0.013254292 | 0.04567891       | -4.105144885 |
| CBLL1        | -0.133185144    | 4.959081548        | -2.535489227 | 0.013260389 | 0.04567891       | -4.185478856 |
| GAA          | 0.102226644     | 8.028909996        | 2.535403466  | 0.01326338  | 0.04567891       | -4.18638634  |
| RPL18        | 0.185432954     | 9.414735788        | 2.535136753  | 0.013272685 | 0.045700508      | -4.112127433 |
| MTIF2        | 0.10488389      | 4.822285297        | 2.534328156  | 0.013300931 | 0.045787299      | -4.170055874 |
| ADRA2C       | 0.304749535     | 0.042012378        | 2.533734007  | 0.01332172  | 0.045848388      | -3.436995429 |
| MCOLN1       | 0.131706631     | 4.626366286        | 2.533467729  | 0.013331047 | 0.045870007      | -4.142459401 |
| NT5M         | 0.222347753     | 1.053691439        | 2.532978158  | 0.01334821  | 0.045918573      | -3.566633517 |
| PSMB7        | 0.137980929     | 7.081032802        | 2.53276073   | 0.013355839 | 0.045934327      | -4.232245452 |
| LRIG2        | -0.202893671    | 3.033187719        | -2.532599759 | 0.013361489 | 0.045943271      | -3.981852158 |
| C9orf85      | 0.107209543     | 3.419002233        | 2.532416511  | 0.013367924 | 0.045954909      | -4.024784175 |
| AP3M1        | -0.152210372    | 5.404969614        | -2.531936239 | 0.013384803 | 0.046002435      | -4.220806321 |
| IL22RA1      | 0.560357377     | -1.370284567       | 2.531407208  | 0.013403418 | 0.046040192      | -3.327671285 |
| TMOD2        | -0.211290425    | 3.950830814        | -2.531363469 | 0.013404958 | 0.046040192      | -4.092933374 |
| A2P5J        | 0.159925668     | 5.562905355        | 2.531509347  | 0.013399822 | 0.046040192      | -4.225803472 |
| ETF1         | -0.235161675    | 2.333440655        | -2.530924014 | 0.01342044  | 0.046082859      | -3.808253034 |
| CDKN2B       | 0.153510048     | 4.464495356        | 2.529762023  | 0.013461455 | 0.046213161      | -4.126090647 |
| TMEM102      | 0.305733194     | -0.124321669       | 2.528355455  | 0.013511253 | 0.046365276      | -3.442426479 |
| RBMS3        | 0.123299437     | 5.707183789        | 2.528336662  | 0.01351192  | 0.046365276      | -4.23587241  |
| LOC105370333 | 0.290402885     | 0.513098925        | 2.527408956  | 0.013544857 | 0.046467713      | -3.455716407 |
| SNRPD2       | 0.182908648     | 7.02033634         | 2.527269334  | 0.01354982  | 0.046474156      | -4.247464402 |
| ACVR2A       | -0.227454988    | 5.348943487        | -2.526343877 | 0.013582761 | 0.046576532      | -4.206954943 |
| TLL11        | 0.145609245     | 2.453445363        | 2.526234416  | 0.013586662 | 0.046579306      | -3.915041472 |
| BTBD11       | 0.569117848     | -1.230818602       | 2.525849865  | 0.013600374 | 0.046606128      | -3.209364209 |
| TRPC4        | -0.241393335    | 2.110136071        | -2.525581383 | 0.013609955 | 0.046606128      | -3.856919477 |
| NUDT1        | 0.194758788     | 3.741014897        | 2.525631436  | 0.013608168 | 0.046606128      | -4.077418611 |
| BRI3         | 0.129699869     | 6.961543268        | 2.525823643  | 0.013601309 | 0.046606128      | -4.250897881 |
| CIAO1        | 0.070509981     | 5.874794124        | 2.525629308  | 0.013608244 | 0.046606128      | -4.251684643 |
| TMEM80       | -0.154194697    | 3.218623909        | -2.525471494 | 0.013613878 | 0.046608967      | -4.001255183 |
| SNRNP25      | 0.170378584     | 3.891498018        | 2.525309458  | 0.013619665 | 0.046618184      | -4.102753329 |
| FRMD3        | 0.421015842     | -0.855067133       | 2.524428537  | 0.013651163 | 0.046704775      | -3.288689268 |
| PSENNEN      | 0.20272464      | 3.501527282        | 2.524483993  | 0.013649179 | 0.046704775      | -4.05178337  |
| CRTAP        | 0.061959727     | 9.390842627        | 2.524254883  | 0.01365738  | 0.046715436      | -4.132344131 |
| HEBP1        | 0.123210371     | 5.867011892        | 2.524137685  | 0.013661578 | 0.046719185      | -4.252447049 |
| S100A6       | 0.205997188     | 10.42415569        | 2.523946827  | 0.013668416 | 0.046731959      | -4.073243559 |
| TMA7         | 0.206367675     | 2.389096935        | 2.523462961  | 0.013685765 | 0.046780658      | -3.881634916 |
| ZNF230       | -0.180201315    | 1.889952638        | -2.52294813  | 0.013704246 | 0.046833203      | -3.864870337 |
| VBP1         | 0.079881125     | 5.222620627        | 2.522234167  | 0.013729913 | 0.046896564      | -4.23554667  |

| Gene      | Log fold change | Average Expression | t            | P-value     | Adjusted P-value | B            |
|-----------|-----------------|--------------------|--------------|-------------|------------------|--------------|
| CPQ       | 0.064990951     | 6.857697059        | 2.522172656  | 0.013732126 | 0.046896564      | -4.260486987 |
| PRKAR2A   | -0.254603232    | 6.146498597        | -2.522313387 | 0.013727062 | 0.046896564      | -4.26373928  |
| PSMC5     | 0.168091961     | 6.591367609        | 2.522065924  | 0.013735967 | 0.04689905       | -4.264802779 |
| RNF8      | 0.095611673     | 4.228875717        | 2.521707449  | 0.013748876 | 0.046932486      | -4.179676095 |
| RSPH3     | -0.216811348    | 3.150290228        | -2.521445297 | 0.013758322 | 0.046947233      | -4.008480139 |
| UBXN1     | 0.149211713     | 6.981205925        | 2.521414607  | 0.013759429 | 0.046947233      | -4.261851176 |
| FOXL2     | 0.341903672     | 1.371314136        | 2.521254289  | 0.013765209 | 0.04695632       | -3.763487439 |
| DNAJC30   | 0.16294948      | 3.736904803        | 2.521035733  | 0.013773093 | 0.046961945      | -4.092294026 |
| ARPC3     | 0.131334877     | 6.053466746        | 2.521109015  | 0.013770449 | 0.046961945      | -4.26455884  |
| STIM2     | -0.114684213    | 3.559695884        | -2.520743764 | 0.013783631 | 0.046987242      | -4.095419794 |
| CS        | 0.078453069     | 6.676172259        | 2.52024548   | 0.013801633 | 0.047037965      | -4.268033061 |
| ECHDC2    | 0.177236374     | 3.065264841        | 2.520055664  | 0.013808497 | 0.047050711      | -4.015740173 |
| ABCC9     | -0.219028176    | 5.687433054        | -2.519923701 | 0.01381327  | 0.047056331      | -4.261671039 |
| PYROXD1   | -0.26513736     | 1.957260823        | -2.519375039 | 0.013833131 | 0.047102688      | -3.74565922  |
| FBXW4     | 0.132168339     | 4.89936357         | 2.519425409  | 0.013831307 | 0.047102688      | -4.210171244 |
| PSMB8     | 0.169402146     | 5.531934016        | 2.519251171  | 0.013837619 | 0.04710732       | -4.250718245 |
| MYPOP     | 0.14892369      | 2.752010157        | 2.51909119   | 0.013843417 | 0.04711641       | -4.002517746 |
| CLCN6     | -0.151426463    | 4.558957491        | -2.518475474 | 0.013865751 | 0.047181765      | -4.202709171 |
| C9orf40   | -0.12600543     | 3.43682433         | -2.518033803 | 0.013881792 | 0.047210455      | -4.055042687 |
| RPL37A    | 0.176757806     | 9.724348599        | 2.518045337  | 0.013881373 | 0.047210455      | -4.134507382 |
| GABPB1    | -0.101312386    | 4.623964466        | -2.517984486 | 0.013883584 | 0.047210455      | -4.202344494 |
| GPRASP1   | -0.156505224    | 2.519533456        | -2.517545023 | 0.013899564 | 0.047252201      | -3.91917872  |
| MORC3     | -0.262868854    | 4.43008486         | -2.517474361 | 0.013902135 | 0.047252201      | -4.19698642  |
| INTS9     | 0.098516804     | 3.83151495         | 2.516837018  | 0.013925342 | 0.047320405      | -4.114934463 |
| ISOC2     | 0.171755804     | 5.19888112         | 2.516662112  | 0.013931717 | 0.047331391      | -4.243150906 |
| ATP5G3    | 0.123415737     | 6.610447687        | 2.516453719  | 0.013939316 | 0.04734653       | -4.277428497 |
| NOP56     | -0.126195185    | 6.216329045        | -2.516238779 | 0.013947158 | 0.047362486      | -4.278374176 |
| GNAQ      | -0.179618692    | 5.846869617        | -2.516103196 | 0.013952106 | 0.047368612      | -4.273933578 |
| FAM189B   | 0.121182556     | 5.966650076        | 2.515360732  | 0.013979233 | 0.047450014      | -4.276180405 |
| NDUFV1    | 0.143831068     | 6.424831825        | 2.5151887    | 0.013985525 | 0.047460677      | -4.281018523 |
| DGCR8     | -0.094950455    | 4.832418643        | -2.514500236 | 0.014010731 | 0.047535506      | -4.236484093 |
| YBX1      | 0.153201439     | 8.676138094        | 2.51432523   | 0.014017145 | 0.047546558      | -4.203021686 |
| MBLAC1    | 0.359952273     | 0.012550015        | 2.514203329  | 0.014021614 | 0.047551011      | -3.453870975 |
| ADGRF3    | 0.480451269     | -1.513957794       | 2.513898644  | 0.01403279  | 0.0475782        | -3.202901415 |
| STARDB8   | -0.235273934    | 1.813538951        | -2.513550278 | 0.014045578 | 0.047610842      | -3.823811015 |
| MVB12A    | 0.162007253     | 4.951337045        | 2.513068755  | 0.014063271 | 0.047649374      | -4.228566655 |
| CAND1     | -0.23638996     | 6.948256362        | -2.513151287 | 0.014060237 | 0.047649374      | -4.27544389  |
| YTHDC2    | -0.177943826    | 3.948452168        | -2.512862516 | 0.014070855 | 0.04766435       | -4.187289957 |
| SLC1A3    | -0.157913698    | 6.279002073        | -2.512768416 | 0.014074317 | 0.047665358      | -4.28552023  |
| TBCB      | 0.178323887     | 5.68216582         | 2.512627741  | 0.014079493 | 0.047672171      | -4.272644807 |
| GOSR2     | -0.087940644    | 3.680019556        | -2.512333457 | 0.014090328 | 0.047698135      | -4.131379757 |
| ZBTB48    | 0.168372839     | 2.385115124        | 2.512058141  | 0.014100471 | 0.047721746      | -3.90010637  |
| PDF       | 0.31698628      | -0.224981461       | 2.511521522  | 0.014120259 | 0.047777984      | -3.43516218  |
| EXD2      | -0.138646188    | 3.877783352        | -2.5114069   | 0.014124489 | 0.047781564      | -4.11850289  |
| CLCN7     | -0.107081836    | 6.699298792        | -2.51050916  | 0.014157659 | 0.047883021      | -4.291326395 |
| SGCE      | 0.076800872     | 5.980695526        | 2.51029929   | 0.014165423 | 0.047898527      | -4.289407248 |
| NAA10     | 0.207808772     | 4.325545354        | 2.510004788  | 0.014176325 | 0.047924633      | -4.184804285 |
| CLC1      | 0.153773499     | 3.932627554        | 2.509847997  | 0.014182133 | 0.047933508      | -4.133881675 |
| ISPD      | -0.247535535    | 0.838339361        | -2.509404969 | 0.014198553 | 0.047956727      | -3.594088169 |
| LMF1      | 0.134922716     | 4.432793716        | 2.509434969  | 0.014197441 | 0.047956727      | -4.201921224 |
| RBBP9     | -0.219203776    | 4.646566607        | -2.509411198 | 0.014198322 | 0.047956727      | -4.226991238 |
| CHM       | -0.268583104    | 4.497411197        | -2.508665228 | 0.014226009 | 0.04803869       | -4.218898403 |
| ACSL3     | -0.21792046     | 6.830336771        | -2.508496417 | 0.014232281 | 0.0480491        | -4.28359976  |
| CAPG      | 0.179938623     | 7.548428376        | 2.508280057  | 0.014240324 | 0.04806548       | -4.274953278 |
| IRAK4     | -0.08991329     | 4.095342833        | -2.50818674  | 0.014243794 | 0.048066422      | -4.165303901 |
| RASEF     | -0.425138826    | -0.655050916       | -2.507849729 | 0.014256332 | 0.048069041      | -3.354869637 |
| SNAPC1    | -0.125777025    | 3.179940536        | -2.507742835 | 0.014260311 | 0.048069041      | -4.01299472  |
| LATS1     | -0.287682934    | 4.611000804        | -2.507967012 | 0.014251967 | 0.048069041      | -4.233388955 |
| EPN1      | 0.131957912     | 7.833219788        | 2.50773709   | 0.014260525 | 0.048069041      | -4.264702656 |
| KAT6A     | -0.343668655    | 5.818159351        | -2.508073451 | 0.014248007 | 0.048069041      | -4.293120616 |
| ABC5      | -0.678604524    | -3.081314868       | -2.507310429 | 0.014276417 | 0.048101424      | -3.056805479 |
| LINC02407 | -0.572207682    | -1.823269183       | -2.507307717 | 0.014276518 | 0.048101424      | -3.190733732 |
| ATXN2     | -0.136468812    | 4.782994952        | -2.506845062 | 0.014293769 | 0.048148777      | -4.259341125 |
| ACVR1     | -0.28359213     | 6.150111912        | -2.506566202 | 0.014304176 | 0.048173061      | -4.299917799 |
| USF3      | -0.168391619    | 3.280548645        | -2.506472198 | 0.014307685 | 0.048174111      | -4.091070202 |
| C8orf82   | 0.149264741     | 4.34838493         | 2.505830092  | 0.014331679 | 0.048244116      | -4.195670649 |
| CLCN5     | -0.277501518    | 3.696393724        | -2.50549258  | 0.014344306 | 0.048256875      | -4.167523328 |
| SLC27A3   | 0.159555551     | 4.415531902        | 2.505618705  | 0.014339586 | 0.048256875      | -4.191487243 |
| MCRI1     | 0.144820252     | 6.959639111        | 2.505471894  | 0.01434508  | 0.048256875      | -4.299215879 |
| ZNF704    | -0.226686837    | 4.015356885        | -2.505225372 | 0.014354309 | 0.048277142      | -4.159336474 |



| Gene         | Log fold change | Average Expression | t            | P-value     | Adjusted P-value | B            |
|--------------|-----------------|--------------------|--------------|-------------|------------------|--------------|
| RNLS         | 0.120147489     | 3.128304428        | 2.504854213  | 0.014368215 | 0.048303795      | -4.054950194 |
| EMC8         | 0.11702941      | 4.59141697         | 2.504842679  | 0.014368647 | 0.048303795      | -4.237694636 |
| BDP1         | -0.252678479    | 3.938005657        | -2.504670312 | 0.014375109 | 0.048314736      | -4.175698021 |
| TBCA         | 0.159042416     | 5.49689862         | 2.504429904  | 0.014384127 | 0.048334259      | -4.285465914 |
| DDIT3        | 0.299994715     | 3.664493537        | 2.50422496   | 0.014391818 | 0.048348468      | -4.13358015  |
| NHSL2        | -0.195890088    | 5.86352157         | -2.50414621  | 0.014394774 | 0.048348468      | -4.303090834 |
| RBP4         | 0.830094138     | -3.069387433       | 2.504023017  | 0.0143994   | 0.048351974      | -3.067590477 |
| PIGV         | -0.101774256    | 3.860513859        | -2.503947463 | 0.014402238 | 0.048351974      | -4.124683585 |
| SULT4A1      | 0.554446203     | -1.714419821       | 2.503810127  | 0.014407397 | 0.048358518      | -3.203667734 |
| ZDHHC23      | -0.284380484    | 0.236032548        | -2.503627952 | 0.014414243 | 0.048359947      | -3.537846881 |
| HBS1L        | -0.070105128    | 5.566933372        | -2.503658386 | 0.014413099 | 0.048359947      | -4.294524498 |
| ANKRD55      | -0.868378387    | -2.669160837       | -2.503392094 | 0.014423112 | 0.048378925      | -3.086449562 |
| PSMA4        | 0.10237733      | 6.54177769         | 2.503182584  | 0.014430993 | 0.048394587      | -4.308919393 |
| DENND6B      | 0.15568858      | 2.663285736        | 2.502905604  | 0.014441419 | 0.048418771      | -3.960056448 |
| RASL11A      | 0.30691654      | 1.14694813         | 2.501985115  | 0.014476116 | 0.048513507      | -3.650197203 |
| HDGF         | 0.072891019     | 8.074312713        | 2.502066772  | 0.014473035 | 0.048513507      | -4.259773069 |
| MAP3K5       | -0.225007473    | 3.394716865        | -2.501491467 | 0.014494754 | 0.048554365      | -4.117397367 |
| ST13         | 0.06540283      | 7.27442541         | 2.50150733   | 0.014494155 | 0.048554365      | -4.296991006 |
| UBXN2B       | -0.140928222    | 3.629316271        | -2.500735642 | 0.014523333 | 0.048639283      | -4.120171797 |
| IFT22        | 0.120294712     | 5.103221969        | 2.500322915  | 0.014538961 | 0.048680797      | -4.270427147 |
| PSME2        | 0.163160384     | 4.989800852        | 2.500028982  | 0.014550099 | 0.048707266      | -4.269213901 |
| NGFR         | 0.801792639     | -2.578505231       | 2.499868192  | 0.014556196 | 0.048716437      | -3.126690858 |
| CYP7B1       | -0.449782391    | 2.45148605         | -2.499765361 | 0.014560096 | 0.048716437      | -3.96685102  |
| HADHA        | 0.074819095     | 8.230956845        | 2.499625796  | 0.014565391 | 0.048716437      | -4.259998214 |
| ENY2         | 0.122362256     | 5.08819758         | 2.49961567   | 0.014565775 | 0.048716437      | -4.28458919  |
| TP53TG1      | 0.20321645      | 2.081058242        | 2.499423054  | 0.014573085 | 0.048730068      | -3.85683311  |
| DGCR14       | 0.124733222     | 4.350541158        | 2.49891698   | 0.014592308 | 0.048783517      | -4.237839188 |
| EIF4A2       | 0.073233769     | 7.535242812        | 2.49826883   | 0.014616961 | 0.048855091      | -4.295668723 |
| GACAT2       | 0.348890561     | 1.823421738        | 2.498120189  | 0.01462262  | 0.048863164      | -3.797740917 |
| CCDC22       | 0.116631668     | 4.467528931        | 2.49738875   | 0.014650495 | 0.048945455      | -4.227482276 |
| APH1B        | -0.140952803    | 4.259826899        | -2.497272445 | 0.014654932 | 0.048949422      | -4.206280087 |
| SMAD7        | 0.135930359     | 4.36427296         | 2.496595955  | 0.014680763 | 0.04902483       | -4.164592483 |
| LOC101927497 | -0.931138772    | -3.51551578        | -2.496338291 | 0.014690612 | 0.04903598       | -3.044254463 |
| PTPRS        | -0.151716437    | 6.119778719        | -2.496384858 | 0.014688832 | 0.04903598       | -4.321388649 |
| XXYL1-AS2    | 0.86203734      | -3.280312121       | 2.495969391  | 0.014704724 | 0.04907221       | -3.056114972 |
| ZNF549       | -0.216286946    | 2.372045033        | -2.495400267 | 0.014726518 | 0.049123178      | -3.99205089  |
| DKK2         | -0.384406013    | 2.924007837        | -2.495454157 | 0.014724453 | 0.049123178      | -4.059644703 |
| THAP1        | -0.141392274    | 3.211325032        | -2.495301656 | 0.014730298 | 0.049124907      | -4.044581595 |
| GLRX5        | 0.139255143     | 4.935127364        | 2.495070501  | 0.01473916  | 0.049143583      | -4.277628887 |
| HSPH1        | 0.152440458     | 6.855993433        | 2.494690551  | 0.014753738 | 0.049181303      | -4.318680338 |
| ZNF14        | 0.120342185     | 2.261855996        | 2.494028853  | 0.014779156 | 0.049255135      | -3.968836231 |
| HNRNPM       | 0.078717347     | 7.264959329        | 2.493522565  | 0.014798632 | 0.049309132      | -4.314347853 |
| KNTC1        | -0.247755753    | 2.54666427         | -2.493349224 | 0.014805305 | 0.049320458      | -3.994461744 |
| C18orf32     | 0.208559733     | 1.267396826        | 2.493183088  | 0.014811703 | 0.049330863      | -3.750263255 |
| CCDC148      | -0.508008337    | -1.626788976       | -2.492754807 | 0.014828209 | 0.049369859      | -3.223164574 |
| C5           | -0.182788045    | 3.293830933        | -2.492709224 | 0.014829966 | 0.049369859      | -4.101704444 |
| PLOD3        | 0.099990053     | 7.662573926        | 2.492423292  | 0.014840996 | 0.049395662      | -4.304731525 |
| GTF3C6       | 0.154336591     | 4.796403354        | 2.491977052  | 0.014858225 | 0.049442081      | -4.272781887 |
| PPIH         | 0.17558834      | 3.156175763        | 2.491751518  | 0.014866939 | 0.049460153      | -4.081129952 |
| ZNF440       | -0.227504918    | 2.472412604        | -2.491047184 | 0.014894183 | 0.049507056      | -4.032796756 |
| TELO2        | 0.130955472     | 4.576867282        | 2.491110084  | 0.014891749 | 0.049507056      | -4.251505247 |
| TERF2        | -0.086339539    | 4.457008254        | -2.491055686 | 0.014893854 | 0.049507056      | -4.257704296 |
| GPC6         | -0.500979167    | 5.082468865        | -2.491163816 | 0.014889669 | 0.049507056      | -4.309445148 |
| BLOC1S6      | -0.067270978    | 6.245480963        | -2.490678698 | 0.014908455 | 0.049543561      | -4.337839682 |
| NEK2         | -0.336466012    | 0.921078728        | -2.490548747 | 0.01491349  | 0.049549365      | -3.60940598  |
| MINDY3       | 0.094661907     | 4.385911066        | 2.490230037  | 0.014925847 | 0.049572338      | -4.226560645 |
| SEC24D       | -0.164979307    | 7.362345681        | -2.490200673 | 0.014926986 | 0.049572338      | -4.307505435 |
| PPP4R4       | -0.390130892    | -0.693124519       | -2.489436625 | 0.01495665  | 0.049659901      | -3.381931987 |
| ZNF585B      | 0.145334791     | 2.722905975        | 2.489075161  | 0.014970701 | 0.049695603      | -4.038070013 |
| MOSPD3       | 0.154660397     | 3.96417978         | 2.488896047  | 0.014977669 | 0.049707778      | -4.192950675 |
| JTB          | 0.128606309     | 6.727679986        | 2.48879477   | 0.01498161  | 0.049709905      | -4.341456791 |
| PRRC2C       | -0.340808357    | 7.182401155        | -2.487468725 | 0.015033295 | 0.049870415      | -4.328782723 |
