# Supplementary material for: Comparison of time and dose dependent gene expression and affected pathways in primary human fibroblasts after exposure to ionizing radiation
Source: PubMed Central journal article supplement (PMC7488023; doi:10.1186/s10020-020-00203-0), 2020-09-09
Supplement: 10020_2020_203_MOESM12_ESM.pdf [file 10020_2020_203_MOESM12_ESM.pdf]

**Web Table 2: Differential expression activity in cellular pathways and involved molecules**

| Ingenuity Canonical Pathways                                 | Model         | $-\log(p\text{-value})$ | Ratio       | z-score      | Molecules                                                                                                                                          |
|--------------------------------------------------------------|---------------|-------------------------|-------------|--------------|----------------------------------------------------------------------------------------------------------------------------------------------------|
| 14-3-3-mediated Signaling                                    | 0.05Gy 2h     | 0.41                    | 0.02        | NaN          | CDKN1B                                                                                                                                             |
| 14-3-3-mediated Signaling                                    | 0.05Gy 4h     | 0.76                    | 0.08        | 0.00         | FOS,PRKCD,PRKCI,STK11                                                                                                                              |
| 14-3-3-mediated Signaling                                    | 2Gy 2h        | 0.52                    | 0.17        | -0.38        | CDKN1B,ELK1,MAPK8,PIK3CB,PIK3CD,PRKCE,RRAS2,TUBB2A,TUBB4B                                                                                          |
| <b>14-3-3-mediated Signaling</b>                             | <b>2Gy 4h</b> | <b>1.37</b>             | <b>0.37</b> | <b>-0.24</b> | <b>AKT1,ELK1,FOS,GSK3B,HRAS,KRAS,MAP2K1,MAPK8,PIK3CB,PIK3CD,PRKCD,PRKCE,PRKCI,PRKD3,RRAS2,SRC,STK11,TUBB2A,YAP1</b>                                |
| 2-ketoglutarate Dehydrogenase Complex                        | 2Gy 4h        | 0.60                    | 1.00        | NaN          | DLD                                                                                                                                                |
| 2-oxobutanoate Degradation I                                 | 2Gy 4h        | 0.60                    | 1.00        | NaN          | DLD                                                                                                                                                |
| 3-phosphoinositide Biosynthesis                              | 0.05Gy 2h     | 0.65                    | 0.04        | NaN          | SOCS3                                                                                                                                              |
| 3-phosphoinositide Biosynthesis                              | 0.05Gy 4h     | 0.50                    | 0.07        | NaN          | CDC25C,PTPN13                                                                                                                                      |
| 3-phosphoinositide Biosynthesis                              | 2Gy 2h        | 0.77                    | 0.22        | -1.63        | CDC25B,DUSP1,PIK3CB,PIK3CD,PTPN2,SOCS3                                                                                                             |
| 3-phosphoinositide Biosynthesis                              | 2Gy 4h        | 1.28                    | 0.41        | 0.30         | CDC25B,DUSP1,NUDT11,PAWR,PIK3CB,PIK3CD,PPP1CA,PPP3CA,PTEN,PTPN13,SOCS3                                                                             |
| 3-phosphoinositide Degradation                               | 0.05Gy 2h     | 0.75                    | 0.05        | NaN          | SOCS3                                                                                                                                              |
| 3-phosphoinositide Degradation                               | 0.05Gy 4h     | 0.66                    | 0.10        | NaN          | CDC25C,PTPN13                                                                                                                                      |
| 3-phosphoinositide Degradation                               | 2Gy 2h        | 0.47                    | 0.19        | -1.00        | CDC25B,DUSP1,PTPN2,SOCS3                                                                                                                           |
| 3-phosphoinositide Degradation                               | 2Gy 4h        | 1.25                    | 0.43        | 0.33         | CDC25B,DUSP1,NUDT11,PAWR,PPP1CA,PPP3CA,PTEN,PTPN13,SOCS3                                                                                           |
| 4-1BB Signaling in T Lymphocytes                             | 2Gy 2h        | 0.63                    | 0.25        | NaN          | IKBKB,IKBKE,MAPK8                                                                                                                                  |
| 4-1BB Signaling in T Lymphocytes                             | 2Gy 4h        | 0.80                    | 0.42        | -1.00        | ATF2,MAP2K1,MAPK8,NFKB1,NFKBIA                                                                                                                     |
| Acetone Degradation I (to Methylglyoxal)                     | 2Gy 4h        | 0.00                    | 0.06        | NaN          | CYP1B1                                                                                                                                             |
| Acetyl-CoA Biosynthesis I (Pyruvate Dehydrogenase Complex)   | 2Gy 4h        | 0.60                    | 1.00        | NaN          | DLD                                                                                                                                                |
| Actin Cytoskeleton Signaling                                 | 0.05Gy 4h     | 0.43                    | 0.05        | NaN          | ACTA2,FGF5,RHOA,VAV2                                                                                                                               |
| Actin Cytoskeleton Signaling                                 | 2Gy 2h        | 0.66                    | 0.18        | -1.00        | ACTA2,CDC42,FGF2,FGF7,FGF9,ITGA5,LIMK2,PDGFA,PIK3CB,PIK3CD,RAC1,RRAS2,SOS1                                                                         |
| Actin Cytoskeleton Signaling                                 | 2Gy 4h        | 0.73                    | 0.30        | 0.89         | ACTA2,BCAR1,CFL1,CRK,EZR,FGF2,FGF5,HRAS,KRAS,LIMK2,MAP2K1,PFN1,PIK3CB,PIK3CD,RAC3,RHOA,ROCK1,ROCK2,RRAS2,SLC9A1,TMSB10/TMSB4X,VAV2                 |
| Actin Nucleation by ARP-WASP Complex                         | 0.05Gy 4h     | 0.55                    | 0.08        | NaN          | RHOA,RHOG                                                                                                                                          |
| <b>Actin Nucleation by ARP-WASP Complex</b>                  | <b>2Gy 2h</b> | <b>2.30</b>             | <b>0.36</b> | <b>0.00</b>  | <b>CDC42,ITGA5,NCK1,RAC1,RHOB,RHOQ,RND3,RRAS2,SOS1</b>                                                                                             |
| Actin Nucleation by ARP-WASP Complex                         | 2Gy 4h        | 0.36                    | 0.28        | -0.82        | HRAS,KRAS,RAC3,RHOA,ROCK1,ROCK2,RRAS2                                                                                                              |
| Activation of IRF by Cytosolic Pattern Recognition Receptors | 0.05Gy 2h     | 0.66                    | 0.04        | NaN          | IL6                                                                                                                                                |
| Activation of IRF by Cytosolic Pattern Recognition Receptors | 2Gy 2h        | 0.52                    | 0.19        | -0.45        | IKBKB,IKBKE,IL6,MAPK8,RIPK1                                                                                                                        |
| Activation of IRF by Cytosolic Pattern Recognition Receptors | 2Gy 4h        | 0.74                    | 0.35        | 0.33         | ATF2,IFIH1,IRF7,MAPK8,NFKB1,NFKBIA,PPIB,RIPK1,TRAF3                                                                                                |
| Acute Myeloid Leukemia Signaling                             | 0.05Gy 2h     | 0.51                    | 0.03        | NaN          | MYC                                                                                                                                                |
| Acute Myeloid Leukemia Signaling                             | 0.05Gy 4h     | 0.31                    | 0.05        | NaN          | KIT,KITLG                                                                                                                                          |
| Acute Myeloid Leukemia Signaling                             | 2Gy 2h        | 0.76                    | 0.21        | -1.89        | MAP2K5,MTOR,MYC,PIK3CB,PIK3CD,RRAS2,RUNX1,SOS1                                                                                                     |
| <b>Acute Myeloid Leukemia Signaling</b>                      | <b>2Gy 4h</b> | <b>1.36</b>             | <b>0.39</b> | <b>-0.58</b> | <b>AKT1,HRAS,KIT,KITLG,KRAS,LEF1,MAP2K1,NFKB1,PIK3CB,PIK3CD,RARA,RRAS2,RUNX1,TCF4,TCF7</b>                                                         |
| Acute Phase Response Signaling                               | 0.05Gy 2h     | 0.61                    | 0.02        | NaN          | IL6,SOCS3                                                                                                                                          |
| Acute Phase Response Signaling                               | 0.05Gy 4h     | 0.00                    | 0.04        | NaN          | FOS,JAK2,NR3C1,SOCS6                                                                                                                               |
| <b>Acute Phase Response Signaling</b>                        | <b>2Gy 2h</b> | <b>1.91</b>             | <b>0.23</b> | <b>0.00</b>  | <b>CEBPB,ELK1,HMOX1,IKBKB,IKBKE,IL6,IL6R,MAPK8,MTOR,NOLC1,PDPK1,PIK3CB,PIK3CD,RIPK1,RRAS2,SERPINE1,SOCS1,SOCS2,SOCS3,SOCS5,SOCS6,SOS1,TNFRSF1B</b> |

| Ingenuity Canonical Pathways                                | Model            | -log(p-value) | Ratio       | z-score      | Molecules                                                                                                                                                                                           |
|-------------------------------------------------------------|------------------|---------------|-------------|--------------|-----------------------------------------------------------------------------------------------------------------------------------------------------------------------------------------------------|
| Acute Phase Response Signaling                              | 2Gy 4h           | 1.07          | 0.31        | -0.76        | AKT1,CRABP2,ELK1,FOS,HMOX1,HMOX2,HRAS,IL1R1,IL6R,IL6ST,JAK2,KRAS,MAP2K1,MAP3K1,MAP3K7,MAPK8,NFKB1,NFKBIA,NGFR,NR3C1,PIK3CB,PIK3CD,RIPK1,RRAS2,SOCS2,SOCS3,SOCS5,SOCS6,SOCS7,TCF4,TNFRSF11B,TNFRSF1B |
| Adenine and Adenosine Salvage III                           | 2Gy 4h           | 0.60          | 1.00        | NaN          | HPRT1                                                                                                                                                                                               |
| Adipogenesis pathway                                        | 0.05Gy 2h        | 0.87          | 0.03        | NaN          | DGKD,EGR2                                                                                                                                                                                           |
| Adipogenesis pathway                                        | 0.05Gy 4h        | 0.00          | 0.01        | NaN          | TGFB1                                                                                                                                                                                               |
| Adipogenesis pathway                                        | 2Gy 2h           | 0.00          | 0.13        | NaN          | CEBPB,CEBPD,DGKD,EGR2,FGF2,HDAC6,NFATC4,SMAD3,TXNIP                                                                                                                                                 |
| Adipogenesis pathway                                        | 2Gy 4h           | 1.13          | 0.33        | NaN          | AKT1,ARNTL,BMP2,BMP4,BMPR2,CCNH,CEBPD,CTNNA1,DDIT3,FGF2,FZD1,HIF1A,KDM1A,KLF5,NR1D2,RBBP7,SMAD3,SOX9,TCF7,TGFB1,TXNIP,WNT5A,ZNF423                                                                  |
| <b>Adrenomedullin signaling pathway</b>                     | <b>0.05Gy 4h</b> | <b>0.28</b>   | <b>0.04</b> | <b>2.00</b>  | <b>BCL2,FOS,MAX,RXR</b>                                                                                                                                                                             |
| Adrenomedullin signaling pathway                            | 2Gy 2h           | 0.43          | 0.16        | -0.83        | ADM,CASP3,CEBPB,ELK1,MAP2K5,MAPK7,MAPK8,MAX,PIK3CB,PIK3CD,RRAS2,RXRA,RXR,SOS1                                                                                                                       |
| Adrenomedullin signaling pathway                            | 2Gy 4h           | 0.00          | 0.25        | -0.22        | ADCY8,AKT1,BCL2,CASP3,ELK1,FOS,GSK3B,HIF1A,HRAS,ITPR2,KRAS,MAP2K1,MAPK8,MAX,NFKB1,NPR3,PIK3CB,PIK3CD,PRKAR2A,PTK2B,RRAS2,RXR                                                                        |
| Agranulocyte Adhesion and Diapedesis                        | 0.05Gy 4h        | 0.00          | 0.04        | NaN          | ACTA2,GNAI2,HRH1                                                                                                                                                                                    |
| Agranulocyte Adhesion and Diapedesis                        | 2Gy 2h           | 0.00          | 0.11        | NaN          | ACTA2,CCL2,CCL7,CXCL1,CXCL2,CXCL8,ITGA5,MMP15,SDC4                                                                                                                                                  |
| Agranulocyte Adhesion and Diapedesis                        | 2Gy 4h           | 0.00          | 0.12        | NaN          | ACTA2,CD99,CXCL16,EZR,GNAI2,GNAI3,HRH1,ICAM1,IL1R1,MMP11                                                                                                                                            |
| Agrin Interactions at Neuromuscular Junction                | 0.05Gy 4h        | 0.42          | 0.06        | NaN          | ACTA2,GABPA                                                                                                                                                                                         |
| Agrin Interactions at Neuromuscular Junction                | 2Gy 2h           | 0.58          | 0.19        | 0.82         | ACTA2,CDC42,ITGA5,MAPK8,RAC1,RRAS2                                                                                                                                                                  |
| Agrin Interactions at Neuromuscular Junction                | 2Gy 4h           | 0.43          | 0.29        | -0.33        | ACTA2,EGFR,GABPA,HRAS,KRAS,MAPK8,RAC3,RRAS2,SRC                                                                                                                                                     |
| Airway Pathology in Chronic Obstructive Pulmonary Disease   | 2Gy 2h           | 0.18          | 0.14        | NaN          | CXCL8                                                                                                                                                                                               |
| Aldosterone Signaling in Epithelial Cells                   | 0.05Gy 4h        | 0.00          | 0.04        | NaN          | PRKCD,PRKCI                                                                                                                                                                                         |
| <b>Aldosterone Signaling in Epithelial Cells</b>            | <b>2Gy 2h</b>    | <b>0.77</b>   | <b>0.20</b> | <b>-2.65</b> | <b>DUSP1,HSPA4L,HSPA9,NR3C2,PDPK1,PIK3CB,PIK3CD,PRKCE,SGK1,SOS1</b>                                                                                                                                 |
| Aldosterone Signaling in Epithelial Cells                   | 2Gy 4h           | 0.73          | 0.31        | -0.30        | DUSP1,HSP90AB1,HSPA4L,HSPA6,HSPA8,ITPR2,KRAS,MAP2K1,PIK3CB,PIK3CD,PRKCD,PRKCE,PRKCI,PRKD3,SLC12A2,SLC9A1                                                                                            |
| Allograft Rejection Signaling                               | 2Gy 2h           | 0.00          | 0.06        | NaN          | FAS                                                                                                                                                                                                 |
| Allograft Rejection Signaling                               | 2Gy 4h           | 0.00          | 0.11        | NaN          | FAS,HLA-E                                                                                                                                                                                           |
| Altered T Cell and B Cell Signaling in Rheumatoid Arthritis | 0.05Gy 2h        | 1.13          | 0.04        | NaN          | IL12A,IL6                                                                                                                                                                                           |
| Altered T Cell and B Cell Signaling in Rheumatoid Arthritis | 0.05Gy 4h        | 0.00          | 0.02        | NaN          | TGFB1                                                                                                                                                                                               |
| Altered T Cell and B Cell Signaling in Rheumatoid Arthritis | 2Gy 2h           | 0.00          | 0.06        | NaN          | FAS,IL6,RELB                                                                                                                                                                                        |
| Altered T Cell and B Cell Signaling in Rheumatoid Arthritis | 2Gy 4h           | 0.00          | 0.13        | NaN          | CSF1,FAS,IL12A,NFKB1,TGFB1,TRAF3                                                                                                                                                                    |
| AMPK Signaling                                              | 0.05Gy 2h        | 0.28          | 0.01        | NaN          | RAB3A                                                                                                                                                                                               |
| AMPK Signaling                                              | 0.05Gy 4h        | 0.38          | 0.05        | NaN          | CDKN1A,PPM1D,SMARCA4,STK11                                                                                                                                                                          |
| <b>AMPK Signaling</b>                                       | <b>2Gy 2h</b>    | <b>1.69</b>   | <b>0.23</b> | <b>-1.70</b> | <b>ACACB,ATF4,CDKN1A,CHRM3,HMGCR,IRS1,IRS2,LIPE,MTOR,PDPK1,PIK3CB,PIK3CD,PPARGC1A,PPM1D,PPP2CA,RAB3A,RAB6A,SLC2A1</b>                                                                               |
| AMPK Signaling                                              | 2Gy 4h           | 0.67          | 0.30        | -0.22        | ADRB2,AKT1,ATF2,ATF4,CCNA2,CDKN1A,CPT1A,CPT2,FOXO3,HMGCR,LIPE,MAP3K7,PIK3CB,PIK3CD,PPM1D,PPM1G,PPP2CA,PRKAR2A,RAB27A,SLC2A1,SMARCA4,SRC,STK11                                                       |
| Amyloid Processing                                          | 2Gy 2h           | 0.00          | 0.06        | NaN          | PRKCE                                                                                                                                                                                               |
| Amyloid Processing                                          | 2Gy 4h           | 0.86          | 0.39        | NaN          | AKT1,CDK5R1,CSNK2B,GSK3B,PRKAR2A,PRKCE,PSEN2                                                                                                                                                        |
| Amyotrophic Lateral Sclerosis Signaling                     | 0.05Gy 4h        | 0.00          | 0.02        | NaN          | BCL2                                                                                                                                                                                                |

| Inguenuity Canonical Pathways                            | Model         | -log(p-value) | Ratio       | z-score     | Molecules                                                                                                                 |
|----------------------------------------------------------|---------------|---------------|-------------|-------------|---------------------------------------------------------------------------------------------------------------------------|
| Amyotrophic Lateral Sclerosis Signaling                  | 2Gy 2h        | 0.45          | 0.17        | 0.00        | BCL2L1,BIRC2,CACNA1A,CASP3,PIK3CB,PIK3CD,RAC1                                                                             |
| Amyotrophic Lateral Sclerosis Signaling                  | 2Gy 4h        | 1.18          | 0.37        | 0.28        | ALS2,BCL2,BCL2L1,BID,CACNA1C,CASP3,GDNF,GLUL,GPX1,PGF,PIK3CB,PIK3CD,PPP3CA,SOD1,XIAP                                      |
| Androgen Signaling                                       | 0.05Gy 4h     | 0.92          | 0.09        | NaN         | GNAI2,GNG5,PRKCD,PRKCI                                                                                                    |
| Androgen Signaling                                       | 2Gy 2h        | 0.00          | 0.11        | NaN         | CACNA1A,GNAO1,PRKCE,SMAD3,TGFB11                                                                                          |
| Androgen Signaling                                       | 2Gy 4h        | 0.88          | 0.33        | -0.91       | CACNA1C,CALR,CCNH,GNAI2,GNAI3,GNG5,NCOA2,NFKB1,PRKAR2A,PRKCD,PRKCE,PRKCI,PRKD3,SMAD3,SRC                                  |
| Angiopoietin Signaling                                   | 2Gy 2h        | 1.06          | 0.25        | 0.45        | IKBKB,IKBKE,NCK1,PIK3CB,PIK3CD,RRAS2,SOS1                                                                                 |
| Angiopoietin Signaling                                   | 2Gy 4h        | 0.60          | 0.32        | -1.13       | AKT1,CRK,HRAS,KRAS,NFKB1,NFKBIA,PIK3CB,PIK3CD,RRAS2                                                                       |
| Antigen Presentation Pathway                             | 0.05Gy 4h     | 1.05          | 0.17        | NaN         | PSMB9,TAP1                                                                                                                |
| Antigen Presentation Pathway                             | 2Gy 4h        | 0.45          | 0.33        | NaN         | CALR,HLA-E,PSMB9,TAP1                                                                                                     |
| Antioxidant Action of Vitamin C                          | 0.05Gy 4h     | 0.00          | 0.03        | NaN         | JAK2                                                                                                                      |
| Antioxidant Action of Vitamin C                          | 2Gy 2h        | 0.97          | 0.23        | 0.38        | HMOX1,IKBKB,IKBKE,MAPK8,NAPEPLD,PLD1,PNPLA8,SLC2A1                                                                        |
| Antioxidant Action of Vitamin C                          | 2Gy 4h        | 0.61          | 0.31        | 1.89        | GLRX,HMOX1,JAK2,MAPK8,NFKB1,NFKBIA,PLD1,PNPLA8,SLC2A1,SLC2A5,TXN                                                          |
| Antiproliferative Role of Somatostatin Receptor 2        | 0.05Gy 2h     | 0.59          | 0.03        | NaN         | CDKN1B                                                                                                                    |
| Antiproliferative Role of Somatostatin Receptor 2        | 0.05Gy 4h     | 0.42          | 0.06        | NaN         | CDKN1A,GNG5                                                                                                               |
| Antiproliferative Role of Somatostatin Receptor 2        | 2Gy 2h        | 0.58          | 0.19        | -0.82       | CDKN1A,CDKN1B,ELK1,PIK3CB,PIK3CD,RRAS2                                                                                    |
| Antiproliferative Role of Somatostatin Receptor 2        | 2Gy 4h        | 0.89          | 0.36        | 0.00        | CDKN1A,ELK1,GNG5,HRAS,KRAS,MAP2K1,NPR3,PIK3CB,PIK3CD,RRAS2,SRC                                                            |
| Antiproliferative Role of TOB in T Cell Signaling        | 0.05Gy 2h     | 0.80          | 0.06        | NaN         | CDKN1B                                                                                                                    |
| Antiproliferative Role of TOB in T Cell Signaling        | 0.05Gy 4h     | 0.76          | 0.11        | NaN         | TGFB1,TGFBR1                                                                                                              |
| Antiproliferative Role of TOB in T Cell Signaling        | 2Gy 2h        | 0.62          | 0.22        | NaN         | CCNE1,CDKN1B,SMAD3,TOB1                                                                                                   |
| <b>Antiproliferative Role of TOB in T Cell Signaling</b> | <b>2Gy 4h</b> | <b>1.72</b>   | <b>0.50</b> | <b>NaN</b>  | <b>CCNA2,CCNE1,CCNE2,SMAD2,SMAD3,SMAD4,TGFB1,TGFBR1,TOB1</b>                                                              |
| Apelin Adipocyte Signaling Pathway                       | 0.05Gy 4h     | 0.00          | 0.02        | NaN         | GNAI2                                                                                                                     |
| Apelin Adipocyte Signaling Pathway                       | 2Gy 2h        | 0.00          | 0.10        | 1.00        | LIPE,MAPK7,MAPK8,PPARGC1A                                                                                                 |
| Apelin Adipocyte Signaling Pathway                       | 2Gy 4h        | 0.45          | 0.29        | 0.58        | ADCY8,GNAI2,GNAI3,GPX1,GSTP1,HIF1A,LIPE,MAPK8,NOX4,PRDX6,PRKAR2A,SOD1                                                     |
| Apelin Cardiac Fibroblast Signaling Pathway              | 0.05Gy 2h     | 0.88          | 0.07        | NaN         | IL6                                                                                                                       |
| Apelin Cardiac Fibroblast Signaling Pathway              | 0.05Gy 4h     | 0.32          | 0.07        | NaN         | TGFB1                                                                                                                     |
| Apelin Cardiac Fibroblast Signaling Pathway              | 2Gy 2h        | 0.00          | 0.13        | NaN         | IL6,SERPINE1                                                                                                              |
| Apelin Cardiac Fibroblast Signaling Pathway              | 2Gy 4h        | 0.00          | 0.20        | NaN         | AKT1,CCN2,TGFB1                                                                                                           |
| Apelin Cardiomyocyte Signaling Pathway                   | 0.05Gy 4h     | 0.92          | 0.09        | 0.00        | GNAI2,PRKCD,PRKCI,TGFB1                                                                                                   |
| Apelin Cardiomyocyte Signaling Pathway                   | 2Gy 2h        | 0.00          | 0.11        | -0.45       | MAPK7,MAPK8,PIK3CB,PIK3CD,PRKCE                                                                                           |
| Apelin Cardiomyocyte Signaling Pathway                   | 2Gy 4h        | 0.67          | 0.31        | -0.28       | AKT1,ATP2A2,GNAI2,GNAI3,HIF1A,MAPK8,PIK3CB,PIK3CD,PRKCD,PRKCE,PRKCI,PRKD3,SLC9A1,TGFB1                                    |
| Apelin Endothelial Signaling Pathway                     | 0.05Gy 4h     | 0.56          | 0.06        | 1.00        | FOS,GNAI2,PRKCD,PRKCI                                                                                                     |
| Apelin Endothelial Signaling Pathway                     | 2Gy 2h        | 0.58          | 0.18        | -1.90       | CCL2,GNAO1,KLF2,MAPK8,MEF2D,MTOR,PIK3CB,PIK3CD,PRKCE,RRAS2,SMAD3                                                          |
| Apelin Endothelial Signaling Pathway                     | 2Gy 4h        | 1.07          | 0.33        | -1.09       | ADCY8,AKT1,FOS,GNAI2,GNAI3,HIF1A,HRAS,ICAM1,KRAS,MAP2K1,MAPK8,NFKB1,PIK3CB,PIK3CD,PRKCD,PRKCE,PRKCI,PRKD3,RRAS2,SMAD3,SP1 |
| Apelin Liver Signaling Pathway                           | 2Gy 2h        | 0.75          | 0.25        | 0.00        | EDN1,FAS,IRS1,MAPK8                                                                                                       |
| Apelin Liver Signaling Pathway                           | 2Gy 4h        | 0.00          | 0.19        | NaN         | FAS,GSK3B,MAPK8                                                                                                           |
| Apelin Muscle Signaling Pathway                          | 2Gy 2h        | 0.33          | 0.18        | NaN         | PPARGC1A,TFAM                                                                                                             |
| Apelin Muscle Signaling Pathway                          | 2Gy 4h        | 0.00          | 0.18        | NaN         | AKT1,NRF1                                                                                                                 |
| Apelin Pancreas Signaling Pathway                        | 2Gy 2h        | 0.26          | 0.15        | NaN         | MAPK8,PIK3CB,PIK3CD                                                                                                       |
| Apelin Pancreas Signaling Pathway                        | 2Gy 4h        | 0.42          | 0.30        | 0.82        | DDIT3,MAPK8,NFKB1,PIK3CB,PIK3CD,PRKAR2A                                                                                   |
| Apoptosis Signaling                                      | 0.05Gy 4h     | 0.27          | 0.05        | NaN         | BCL2,LMNA                                                                                                                 |
| <b>Apoptosis Signaling</b>                               | <b>2Gy 2h</b> | <b>1.98</b>   | <b>0.29</b> | <b>1.16</b> | <b>BCL2L1,BCL2L11,BIRC2,CASP3,CASP8,FAS,IKBKB,IKBKE,MAPK8,PRKCE,RRAS2,TNFRSF1B</b>                                        |

| Ingenuity Canonical Pathways                  | Model            | $-\log(p\text{-value})$ | Ratio       | z-score      | Molecules                                                                                                                                                                                                                                                                                           |
|-----------------------------------------------|------------------|-------------------------|-------------|--------------|-----------------------------------------------------------------------------------------------------------------------------------------------------------------------------------------------------------------------------------------------------------------------------------------------------|
| <b>Apoptosis Signaling</b>                    | <b>2Gy 4h</b>    | <b>2.93</b>             | <b>0.48</b> | <b>0.69</b>  | <b>AIFM1,BCL2,BCL2L1,BID,CASP3,ENDO G,FAS,HRAS,KRAS,LMNA,MAP2K1,MAP4K4,MAPK8,NFKB1,NFKBIA,PRKCE,ROCK1,RRAS2,TNFRSF1B,XIAP</b>                                                                                                                                                                       |
| April Mediated Signaling                      | 0.05Gy 4h        | 0.66                    | 0.10        | NaN          | FOS,NFATC1                                                                                                                                                                                                                                                                                          |
| April Mediated Signaling                      | 2Gy 2h           | 1.20                    | 0.29        | -0.82        | ELK1,IKBKB,IKBKE,MAPK8,NFATC1,NFATC4                                                                                                                                                                                                                                                                |
| April Mediated Signaling                      | 2Gy 4h           | 1.25                    | 0.43        | -1.67        | ELK1,FOS,MAP3K1,MAPK8,NFAT5,NFATC1,NFKB1,NFKBIA,TRAF3                                                                                                                                                                                                                                               |
| Arginine Biosynthesis IV                      | 2Gy 2h           | 0.34                    | 0.25        | NaN          | OAT                                                                                                                                                                                                                                                                                                 |
| Arginine Biosynthesis IV                      | 2Gy 4h           | 0.58                    | 0.50        | NaN          | GLUD1,OAT                                                                                                                                                                                                                                                                                           |
| Arginine Degradation I (Arginase Pathway)     | 2Gy 2h           | 0.44                    | 0.33        | NaN          | OAT                                                                                                                                                                                                                                                                                                 |
| Arginine Degradation I (Arginase Pathway)     | 2Gy 4h           | 0.24                    | 0.33        | NaN          | OAT                                                                                                                                                                                                                                                                                                 |
| Arginine Degradation VI (Arginase 2 Pathway)  | 2Gy 2h           | 0.34                    | 0.25        | NaN          | OAT                                                                                                                                                                                                                                                                                                 |
| Arginine Degradation VI (Arginase 2 Pathway)  | 2Gy 4h           | 0.58                    | 0.50        | NaN          | OAT,PYCR1                                                                                                                                                                                                                                                                                           |
| <b>Aryl Hydrocarbon Receptor Signaling</b>    | <b>0.05Gy 2h</b> | <b>1.40</b>             | <b>0.04</b> | <b>NaN</b>   | <b>CDKN1B,IL6,MYC</b>                                                                                                                                                                                                                                                                               |
| Aryl Hydrocarbon Receptor Signaling           | 0.05Gy 4h        | 1.26                    | 0.09        | -1.13        | CDKN1A,FOS,MDM2,RARG,RXRB,SMARCA4,TGFB1                                                                                                                                                                                                                                                             |
| Aryl Hydrocarbon Receptor Signaling           | 2Gy 2h           | 0.59                    | 0.17        | -0.54        | CCNE1,CDKN1A,CDKN1B,CHEK1,FAS,IL6,MAPK8,MDM2,MYC,NCOR2,PTGES3,RARG,RXRA,RXRB                                                                                                                                                                                                                        |
| Aryl Hydrocarbon Receptor Signaling           | 2Gy 4h           | 1.19                    | 0.33        | -1.63        | ALDH18A1,ATM,CCNA2,CCNE1,CCNE2,CDKN1A,CDKN2A,CTSD,CYP1B1,E2F1,FAS,FOS,GSTP1,HSP90AB1,MAPK8,MDM2,NCOA2,NFIB,NFKB1,PTGES3,RARA,RBL2,RXRB,SMARCA4,SP1,Src,TGFB1                                                                                                                                        |
| Ascorbate Recycling (Cytosolic)               | 2Gy 4h           | 0.60                    | 1.00        | NaN          | GLRX                                                                                                                                                                                                                                                                                                |
| Assembly of RNA Polymerase II Complex         | 2Gy 4h           | 0.60                    | 1.00        | NaN          | CCNH                                                                                                                                                                                                                                                                                                |
| <b>Assembly of RNA Polymerase III Complex</b> | <b>0.05Gy 4h</b> | <b>1.37</b>             | <b>1.00</b> | <b>NaN</b>   | <b>BRF1</b>                                                                                                                                                                                                                                                                                         |
| Assembly of RNA Polymerase III Complex        | 2Gy 4h           | 0.60                    | 1.00        | NaN          | BRF1                                                                                                                                                                                                                                                                                                |
| Atherosclerosis Signaling                     | 0.05Gy 2h        | 0.31                    | 0.01        | NaN          | IL6                                                                                                                                                                                                                                                                                                 |
| Atherosclerosis Signaling                     | 0.05Gy 4h        | 0.00                    | 0.01        | NaN          | TGFB1                                                                                                                                                                                                                                                                                               |
| Atherosclerosis Signaling                     | 2Gy 2h           | 0.00                    | 0.11        | NaN          | APOE,CCL2,CXCL8,F3,IL6,PDGFA,PNPLA8,TNFRSF12A                                                                                                                                                                                                                                                       |
| Atherosclerosis Signaling                     | 2Gy 4h           | 0.00                    | 0.09        | NaN          | CSF1,ICAM1,NFKB1,PNPLA8,TGFB1,TNFRSF12A                                                                                                                                                                                                                                                             |
| <b>ATM Signaling</b>                          | <b>0.05Gy 4h</b> | <b>2.06</b>             | <b>0.16</b> | <b>-0.45</b> | <b>CDC25C,CDKN1A,MDM2,PPM1D,TRIM28</b>                                                                                                                                                                                                                                                              |
| ATM Signaling                                 | 2Gy 2h           | 0.87                    | 0.23        | -0.38        | ATF4,CDKN1A,CHEK1,MAPK8,MDM2,PPM1D,PPP2CA                                                                                                                                                                                                                                                           |
| <b>ATM Signaling</b>                          | <b>2Gy 4h</b>    | <b>1.95</b>             | <b>0.45</b> | <b>-0.58</b> | <b>ABL1,ATF2,ATF4,ATM,BID,CCNB1,CDKN1A,GADD45A,MAPK8,MDM2,NFKBIA,PPM1D,PPP2CA,TRIM28</b>                                                                                                                                                                                                            |
| Autoimmune Thyroid Disease Signaling          | 2Gy 2h           | 0.00                    | 0.06        | NaN          | FAS                                                                                                                                                                                                                                                                                                 |
| Autoimmune Thyroid Disease Signaling          | 2Gy 4h           | 0.00                    | 0.12        | NaN          | FAS,HLA-E                                                                                                                                                                                                                                                                                           |
| Autophagy                                     | 0.05Gy 4h        | 0.34                    | 0.07        | NaN          | BCL2                                                                                                                                                                                                                                                                                                |
| Autophagy                                     | 2Gy 2h           | 0.50                    | 0.21        | NaN          | ATG9A,MAP1LC3B,MTOR                                                                                                                                                                                                                                                                                 |
| Autophagy                                     | 2Gy 4h           | 0.59                    | 0.36        | NaN          | ATG9A,BCL2,CTSD,MAP1LC3A,MAP1LC3B                                                                                                                                                                                                                                                                   |
| Axonal Guidance Signaling                     | 0.05Gy 4h        | 0.26                    | 0.04        | NaN          | ADAM15,EFNA4,GNAI2,GNG5,NFATC1,PRKCD,PRKCI,RHOA                                                                                                                                                                                                                                                     |
| Axonal Guidance Signaling                     | 2Gy 2h           | 0.00                    | 0.13        | NaN          | BDNF,CDC42,EFNB1,EPHA2,EPHB3,EPHB4,GLI3,GNAO1,ITGA5,LIMK2,MMP15,NCK1,NFATC1,NFATC4,PDGFA,PIK3CB,PIK3CD,PPP3CC,PPP3R1,PRKCE,RAC1,RRAS2,SOS1,TUBB2A,TUBB4B                                                                                                                                            |
| Axonal Guidance Signaling                     | 2Gy 4h           | 0.48                    | 0.27        | NaN          | ABL1,ADAM15,ADAM17,AKT1,BCAR1,BMP1,BMP2,BMP4,CFL1,CRK,EFNB1,EPHA2,EPHB4,FZD1,GLI3,GNAI2,GNAI3,GNG5,GSK3B,HRAS,KRAS,LIMK2,MAP2K1,MMP11,NFAT5,NFATC1,NGFR,NRP1,PFN1,PGF,PIK3CB,PIK3CD,PPP3CA,PPP3CB,PPP3CC,PPP3R1,PRKAR2A,PRKCD,PRKCE,PRKCI,PRKD3,PTCH1,RAC3,RHOA,ROCK1,ROCK2,RRAS2,RTN4,TUBB2A,WNT5A |
| B Cell Activating Factor Signaling            | 0.05Gy 4h        | 0.66                    | 0.10        | NaN          | FOS,NFATC1                                                                                                                                                                                                                                                                                          |
| B Cell Activating Factor Signaling            | 2Gy 2h           | 1.20                    | 0.29        | -0.82        | ELK1,IKBKB,IKBKE,MAPK8,NFATC1,NFATC4                                                                                                                                                                                                                                                                |

| Ingenuity Canonical Pathways                      | Model            | -log(p-value) | Ratio       | z-score      | Molecules                                                                                                                                                                                       |
|---------------------------------------------------|------------------|---------------|-------------|--------------|-------------------------------------------------------------------------------------------------------------------------------------------------------------------------------------------------|
| B Cell Activating Factor Signaling                | 2Gy 4h           | 1.25          | 0.43        | -1.89        | ELK1,FOS,MAP3K1,MAPK8,NFAT5,NFATC1,NFKB1,NFKBIA,TRAF3                                                                                                                                           |
| B Cell Receptor Signaling                         | 0.05Gy 2h        | 0.29          | 0.01        | NaN          | EGR1                                                                                                                                                                                            |
| B Cell Receptor Signaling                         | 0.05Gy 4h        | 0.00          | 0.04        | NaN          | EGR1,NFATC1,VAV2                                                                                                                                                                                |
| <b>B Cell Receptor Signaling</b>                  | <b>2Gy 2h</b>    | <b>2.97</b>   | <b>0.28</b> | <b>-1.53</b> | <b>ATF4,BCL2L1,BCL6,CAMK2G,CDC42,EGR1,ELK1,IKBKB,IKBKE,MAPK8,MTOR,NFATC1,NFATC4,PDPK1,PIK3CB,PIK3CD,PPP3CC,PPP3R1,RAC1,RRAS2,SOS1</b>                                                           |
| <b>B Cell Receptor Signaling</b>                  | <b>2Gy 4h</b>    | <b>2.90</b>   | <b>0.41</b> | <b>-0.54</b> | <b>ABL1,AKT1,ATF2,ATF4,BCL2L1,BCL6,CFL1,EGR1,ELK1,ETS1,GSK3B,HRAS,KRAS,MAP2K1,MAP3K1,MAP3K7,MAPK8,NFAT5,NFATC1,NFKB1,NFKBIA,PIK3CB,PIK3CD,PPP3CA,PPP3CB,PPP3CC,PPP3R1,PTEN,PTK2B,RRAS2,VAV2</b> |
| BAG2 Signaling Pathway                            | 0.05Gy 2h        | 0.88          | 0.07        | NaN          | MYC                                                                                                                                                                                             |
| BAG2 Signaling Pathway                            | 0.05Gy 4h        | 0.89          | 0.13        | NaN          | CDKN1A,MDM2                                                                                                                                                                                     |
| <b>BAG2 Signaling Pathway</b>                     | <b>2Gy 2h</b>    | <b>1.32</b>   | <b>0.33</b> | <b>1.34</b>  | <b>CASP3,CDKN1A,HSPA9,MDM2,MYC</b>                                                                                                                                                              |
| <b>BAG2 Signaling Pathway</b>                     | <b>2Gy 4h</b>    | <b>1.76</b>   | <b>0.53</b> | <b>0.00</b>  | <b>CASP3,CDKN1A,HSPA6,HSPA8,MDM2,NFKB1,SP1,STUB1</b>                                                                                                                                            |
| Basal Cell Carcinoma Signaling                    | 2Gy 2h           | 0.00          | 0.03        | NaN          | GLI3                                                                                                                                                                                            |
| <b>Basal Cell Carcinoma Signaling</b>             | <b>2Gy 4h</b>    | <b>1.32</b>   | <b>0.39</b> | <b>-0.71</b> | <b>AXIN1,BMP1,BMP2,BMP4,CTNNB1,FZD1,GLI3,GSK3B,LEF1,PTCH1,TCF4,TCF7,WNT5A</b>                                                                                                                   |
| BER pathway                                       | 2Gy 2h           | 0.22          | 0.17        | NaN          | PCNA                                                                                                                                                                                            |
| <b>BER pathway</b>                                | <b>2Gy 4h</b>    | <b>1.42</b>   | <b>0.67</b> | <b>NaN</b>   | <b>APEX1,LIG1,PCNA,POLB</b>                                                                                                                                                                     |
| Bile Acid Biosynthesis, Neutral Pathway           | 2Gy 2h           | 0.00          | 0.13        | NaN          | SCP2                                                                                                                                                                                            |
| Biotin-carboxyl Carrier Protein Assembly          | 2Gy 2h           | 0.44          | 0.33        | NaN          | ACACB                                                                                                                                                                                           |
| Biotin-carboxyl Carrier Protein Assembly          | 2Gy 4h           | 0.24          | 0.33        | NaN          | HLCS                                                                                                                                                                                            |
| Bladder Cancer Signaling                          | 0.05Gy 2h        | 0.41          | 0.02        | NaN          | MYC                                                                                                                                                                                             |
| Bladder Cancer Signaling                          | 0.05Gy 4h        | 0.42          | 0.06        | NaN          | CDKN1A,FGF5,MDM2                                                                                                                                                                                |
| Bladder Cancer Signaling                          | 2Gy 2h           | 0.73          | 0.19        | -0.45        | CDKN1A,CXCL8,FGF2,FGF7,FGF9,MDM2,MMP15,MYC,RASSF1,RRAS2                                                                                                                                         |
| Bladder Cancer Signaling                          | 2Gy 4h           | 0.68          | 0.31        | 0.00         | ABL1,CDKN1A,CDKN2A,E2F1,EGFR,FGF2,FGF5,HRAS,KRAS,MAP2K1,MDM2,MMP11,PA2G4,PGF,RASSF1,RRAS2                                                                                                       |
| BMP signaling pathway                             | 0.05Gy 2h        | 0.48          | 0.02        | NaN          | FST                                                                                                                                                                                             |
| BMP signaling pathway                             | 2Gy 2h           | 0.26          | 0.14        | -0.82        | FST,MAPK8,RRAS2,RUNX2,SMAD7,SOS1                                                                                                                                                                |
| <b>BMP signaling pathway</b>                      | <b>2Gy 4h</b>    | <b>2.93</b>   | <b>0.48</b> | <b>-0.94</b> | <b>ATF2,BMP1,BMP2,BMP4,BMPR2,FST,GREM1,HRAS,KRAS,MAP2K1,MAP3K7,MAPK8,NFKB1,PRKAR2A,RRAS2,SMAD4,SMAD6,SMAD7,XIAP,ZNF423</b>                                                                      |
| Branched-chain Î±-keto acid Dehydrogenase Complex | 2Gy 4h           | 0.36          | 0.50        | NaN          | DLD                                                                                                                                                                                             |
| Breast Cancer Regulation by Stathmin1             | 0.05Gy 2h        | 0.26          | 0.01        | NaN          | CDKN1B                                                                                                                                                                                          |
| <b>Breast Cancer Regulation by Stathmin1</b>      | <b>0.05Gy 4h</b> | <b>1.63</b>   | <b>0.10</b> | <b>NaN</b>   | <b>CDKN1A,E2F4,E2F5,GNAI2,GNG5,PRKCD,PRKCI,RHOA</b>                                                                                                                                             |
| Breast Cancer Regulation by Stathmin1             | 2Gy 2h           | 0.71          | 0.18        | NaN          | CAMK2G,CCNE1,CDC42,CDKN1A,CDKN1B,LIMK2,PIK3CB,PIK3CD,PPP2CA,PRKCE,RAC1,RRAS2,SOS1,TUBB2A,TUBB4B                                                                                                 |
| <b>Breast Cancer Regulation by Stathmin1</b>      | <b>2Gy 4h</b>    | <b>1.75</b>   | <b>0.36</b> | <b>NaN</b>   | <b>ADCY8,ARHGEF3,CAMK1,CCNE1,CCNE2,CDKN1A,E2F1,E2F5,GNAI2,GNAI3,GNG5,HRAS,ITPR2,KRAS,LIMK2,MAP2K1,PIK3CB,PIK3CD,PPP1CA,PPP2CA,PRKAR2A,PRKCD,PRKCE,PRKCI,PRKD3,RHOA,ROCK1,ROCK2,RRAS2,TUBB2A</b> |
| Bupropion Degradation                             | 2Gy 4h           | 0.00          | 0.07        | NaN          | CYP1B1                                                                                                                                                                                          |
| Calcium Signaling                                 | 0.05Gy 4h        | 0.00          | 0.03        | NaN          | ACTA2,NFATC1                                                                                                                                                                                    |
| Calcium Signaling                                 | 2Gy 2h           | 0.53          | 0.17        | -2.12        | ACTA2,ATF4,CACNA1A,CAMK2G,HDAC6,MEF2D,NFATC1,NFATC4,PPP3CC,PPP3R1                                                                                                                               |
| Calcium Signaling                                 | 2Gy 4h           | 1.17          | 0.35        | -2.14        | ACTA2,ATF2,ATF4,ATP2A2,ATP2B1,ATP2C1,CACNA1C,CALR,CAMK1,ITPR2,NFAT5,NFATC1,PPP3CA,PPP3CB,PPP3CC,PPP3R1,PRKAR2A,TP63,TRPC1,TRPC6                                                                 |
| Calcium Transport I                               | 2Gy 4h           | 0.98          | 0.60        | NaN          | ATP2A2,ATP2B1,ATP2C1                                                                                                                                                                            |
| Calcium-induced T Lymphocyte Apoptosis            | 0.05Gy 4h        | 0.37          | 0.06        | NaN          | PRKCD,PRKCI                                                                                                                                                                                     |
| Calcium-induced T Lymphocyte Apoptosis            | 2Gy 2h           | 0.27          | 0.15        | -1.34        | MEF2D,NR4A1,PPP3CC,PPP3R1,PRKCE                                                                                                                                                                 |
| Calcium-induced T Lymphocyte Apoptosis            | 2Gy 4h           | 0.47          | 0.29        | -1.90        | ATP2A2,ITPR2,PPP3CA,PPP3CB,PPP3CC,PPP3R1,PRKCD,PRKCE,PRKCI,PRKD3                                                                                                                                |

| Ingenuity Canonical Pathways                           | Model            | -log(p-value) | Ratio       | z-score      | Molecules                                                                                                                                                                                                                                                                                                                                                                                                                                   |
|--------------------------------------------------------|------------------|---------------|-------------|--------------|---------------------------------------------------------------------------------------------------------------------------------------------------------------------------------------------------------------------------------------------------------------------------------------------------------------------------------------------------------------------------------------------------------------------------------------------|
| cAMP-mediated signaling                                | 0.05Gy 4h        | 0.00          | 0.01        | NaN          | GNAI2                                                                                                                                                                                                                                                                                                                                                                                                                                       |
| cAMP-mediated signaling                                | 2Gy 2h           | 0.00          | 0.14        | -0.54        | ATF4,CAMK2G,CHRM3,DUSP1,DUSP6,GNAO1,NAPEPLD,PDE4D,PPP3CC,PPP3R1,PTGER4,RGS12,RGS4,S1PR3                                                                                                                                                                                                                                                                                                                                                     |
| cAMP-mediated signaling                                | 2Gy 4h           | 0.00          | 0.24        | -0.60        | ADCY8,ADORA2B,ADRB2,APEX1,ATF2,ATF4,CAMK1,CREM,DUSP1,DUSP6,GNAI2,GNAI3,LPAR1,MAP2K1,NPR3,PKIG,PPP3CA,PPP3CB,PPP3CC,PPP3R1,PRKAR2A,PTGER2,PTGER3,RGS4,SRC                                                                                                                                                                                                                                                                                    |
| Cancer Drug Resistance By Drug Efflux                  | 0.05Gy 2h        | 0.56          | 0.03        | NaN          | PTGS2                                                                                                                                                                                                                                                                                                                                                                                                                                       |
| Cancer Drug Resistance By Drug Efflux                  | 0.05Gy 4h        | 0.00          | 0.03        | NaN          | MDM2                                                                                                                                                                                                                                                                                                                                                                                                                                        |
| Cancer Drug Resistance By Drug Efflux                  | 2Gy 2h           | 0.27          | 0.15        | NaN          | MDM2,PIK3CB,PIK3CD,PTGS2,RRAS2                                                                                                                                                                                                                                                                                                                                                                                                              |
| Cancer Drug Resistance By Drug Efflux                  | 2Gy 4h           | 1.22          | 0.38        | NaN          | AKT1,FOXO3,HRAS,KRAS,MAP2K1,MDM2,NFKB1,PIK3CB,PIK3CD,PTEN,PTGS2,RRAS2,YBX1                                                                                                                                                                                                                                                                                                                                                                  |
| Cardiac Hypertrophy Signaling                          | 0.05Gy 2h        | 0.22          | 0.01        | NaN          | IL6                                                                                                                                                                                                                                                                                                                                                                                                                                         |
| Cardiac Hypertrophy Signaling                          | 0.05Gy 4h        | 0.64          | 0.06        | 0.82         | GNAI2,GNG5,RHOA,RHOG,TGFB1,TGFBR1                                                                                                                                                                                                                                                                                                                                                                                                           |
| <b>Cardiac Hypertrophy Signaling</b>                   | <b>2Gy 2h</b>    | <b>1.55</b>   | <b>0.21</b> | <b>-1.41</b> | <b>CACNA1A,CDC42,ELK1,GNAO1,IL6,IL6R,IRS1,MAPK8,MEF2D,MTOR,NFATC4,PIK3CB,PIK3CD,PPP3CC,PPP3R1,RAC1,RHOB,RHOQ,RND3,RRAS2,SOS1</b>                                                                                                                                                                                                                                                                                                            |
| Cardiac Hypertrophy Signaling                          | 2Gy 4h           | 1.28          | 0.33        | -1.62        | ADCY8,ADRB2,AKT1,ATF2,CACNA1C,ELK1,GNAI2,GNAI3,GNG5,GSK3B,HRAS,IL6R,KRAS,MAP2K1,MAP3K1,MAP3K7,MAPK8,PIK3CB,PIK3CD,PPP3CA,PPP3CB,PPP3CC,PPP3R1,PRKAR2A,RAC3,RHOA,ROCK1,ROCK2,RRAS2,SRF,TGFB1,TGFBR1                                                                                                                                                                                                                                          |
| Cardiac Hypertrophy Signaling (Enhanced)               | 0.05Gy 2h        | 1.12          | 0.02        | -1.34        | IL11,IL12A,IL6,MYC,PTGS2                                                                                                                                                                                                                                                                                                                                                                                                                    |
| Cardiac Hypertrophy Signaling (Enhanced)               | 0.05Gy 4h        | 0.00          | 0.04        | 0.63         | FGF5,GNAI2,GNG5,JAK2,NFATC1,PRKCD,PRKCI,RHOA,TGFB1,TGFBR1                                                                                                                                                                                                                                                                                                                                                                                   |
| Cardiac Hypertrophy Signaling (Enhanced)               | 2Gy 2h           | 0.29          | 0.14        | -2.54        | ACVR2A,CACNA1A,CAMK2G,CXCL8,EDN1,ELK1,FGF2,FGF7,FGF9,HDAC6,IKBKB,IKBKE,IL11,IL4R,IL6,IL6R,ITGA5,MAP2K5,MAPK7,MAPK8,MEF2D,MTOR,MYC,NAPEPLD,NFATC1,NFATC4,PDE4D,PIK3CB,PIK3CD,PPP3CC,PPP3R1,PRKCE,PTGS2,RRAS2,TNFRSF1B                                                                                                                                                                                                                        |
| Cardiac Hypertrophy Signaling (Enhanced)               | 2Gy 4h           | 0.92          | 0.28        | -2.81        | ACVR1,ACVR1B,ACVR2A,ADCY8,ADRB2,AKT1,APEX1,ATF2,ATF6,ATP2A2,BMPR2,CACNA1C,CLCF1,CNTF,CTNNA1,DLG1,ELK1,FGF2,FGF5,FZD1,GHR,GNAI2,GNAI3,GNG5,GSK3B,HRAS,IL12A,IL17RA,IL18R1,IL1R1,IL22RA1,IL4R,IL6R,IL6ST,ITPR2,JAK2,KRAS,LIF,MAP2K1,MAP3K1,MAP3K7,MAPK8,NFAT5,NFATC1,NFKB1,NGFR,PIK3CB,PIK3CD,PPP3CA,PPP3CB,PPP3CC,PPP3R1,PRKAR2A,PRKCD,PRKCE,PRKCI,PRKD3,PTEN,PTGS2,RHOA,ROCK1,ROCK2,RRAS2,SRF,TGFB1,TGFBR1,TNFRSF11B,TNFRSF1B,TNFSF10,WNT5A |
| Cardiac I <sup>2</sup> -adrenergic Signaling           | 0.05Gy 4h        | 0.00          | 0.03        | NaN          | GNG5                                                                                                                                                                                                                                                                                                                                                                                                                                        |
| Cardiac I <sup>2</sup> -adrenergic Signaling           | 2Gy 2h           | 0.00          | 0.11        | -2.00        | CACNA1A,NAPEPLD,PDE4D,PPP2CA                                                                                                                                                                                                                                                                                                                                                                                                                |
| Cardiac I <sup>2</sup> -adrenergic Signaling           | 2Gy 4h           | 0.00          | 0.25        | -0.71        | ADCY8,APEX1,ATP2A2,CACNA1C,GNG5,PKIG,PPP1CA,PPP2CA,PRKAR2A                                                                                                                                                                                                                                                                                                                                                                                  |
| <b>Cardiomyocyte Differentiation via BMP Receptors</b> | <b>2Gy 4h</b>    | <b>1.85</b>   | <b>0.58</b> | <b>-1.34</b> | <b>ATF2,BMP2,BMP4,BMPR2,MAP3K7,SMAD4,SMAD6</b>                                                                                                                                                                                                                                                                                                                                                                                              |
| Caveolar-mediated Endocytosis Signaling                | 0.05Gy 4h        | 0.00          | 0.03        | NaN          | ACTA2                                                                                                                                                                                                                                                                                                                                                                                                                                       |
| Caveolar-mediated Endocytosis Signaling                | 2Gy 2h           | 0.00          | 0.09        | NaN          | ACTA2,CD55,ITGA5                                                                                                                                                                                                                                                                                                                                                                                                                            |
| Caveolar-mediated Endocytosis Signaling                | 2Gy 4h           | 0.00          | 0.18        | NaN          | ABL1,ACTA2,EGFR,HLA-E,ITGB8,SRC                                                                                                                                                                                                                                                                                                                                                                                                             |
| CCR3 Signaling in Eosinophils                          | 0.05Gy 4h        | 1.18          | 0.10        | NaN          | GNAI2,GNG5,PRKCD,PRKCI,RHOA                                                                                                                                                                                                                                                                                                                                                                                                                 |
| CCR3 Signaling in Eosinophils                          | 2Gy 2h           | 0.00          | 0.12        | -0.45        | LIMK2,PIK3CB,PIK3CD,PRKCE,RAC1,RRAS2                                                                                                                                                                                                                                                                                                                                                                                                        |
| <b>CCR3 Signaling in Eosinophils</b>                   | <b>2Gy 4h</b>    | <b>1.37</b>   | <b>0.37</b> | <b>0.00</b>  | <b>CFL1,GNAI2,GNAI3,GNG5,HRAS,ITPR2,KRAS,LIMK2,MAP2K1,PIK3CB,PIK3CD,PRKCD,PRKCE,PRKCI,PRKD3,RHOA,ROCK1,ROCK2,RRAS2</b>                                                                                                                                                                                                                                                                                                                      |
| <b>CCR5 Signaling in Macrophages</b>                   | <b>0.05Gy 4h</b> | <b>2.00</b>   | <b>0.16</b> | <b>1.00</b>  | <b>FOS,GNAI2,GNG5,PRKCD,PRKCI</b>                                                                                                                                                                                                                                                                                                                                                                                                           |
| CCR5 Signaling in Macrophages                          | 2Gy 2h           | 0.00          | 0.13        | NaN          | CACNA1A,FAS,MAPK8,PRKCE                                                                                                                                                                                                                                                                                                                                                                                                                     |
| CCR5 Signaling in Macrophages                          | 2Gy 4h           | 1.10          | 0.38        | -0.33        | CACNA1C,FAS,FOS,GNAI2,GNAI3,GNG5,MAPK8,PRKCD,PRKCE,PRKCI,PRKD3,PTK2B                                                                                                                                                                                                                                                                                                                                                                        |
| CD27 Signaling in Lymphocytes                          | 0.05Gy 4h        | 0.00          | 0.04        | NaN          | FOS                                                                                                                                                                                                                                                                                                                                                                                                                                         |
| CD27 Signaling in Lymphocytes                          | 2Gy 2h           | 1.29          | 0.28        | -0.38        | BCL2L1,CASP3,CASP8,IKBKB,IKBKE,MAP2K5,MAPK8                                                                                                                                                                                                                                                                                                                                                                                                 |
| <b>CD27 Signaling in Lymphocytes</b>                   | <b>2Gy 4h</b>    | <b>1.53</b>   | <b>0.44</b> | <b>-0.63</b> | <b>BCL2L1,BID,CASP3,FOS,MAP2K1,MAP3K1,MAP3K7,MAPK8,NFKB1,NFKBIA,SIVA1</b>                                                                                                                                                                                                                                                                                                                                                                   |

| Ingenuity Canonical Pathways                             | Model            | -log(p-value) | Ratio       | z-score      | Molecules                                                                                                               |
|----------------------------------------------------------|------------------|---------------|-------------|--------------|-------------------------------------------------------------------------------------------------------------------------|
| CD28 Signaling in T Helper Cells                         | 0.05Gy 4h        | 0.00          | 0.04        | NaN          | FOS,NFATC1                                                                                                              |
| <b>CD28 Signaling in T Helper Cells</b>                  | <b>2Gy 2h</b>    | <b>1.34</b>   | <b>0.24</b> | <b>-1.16</b> | <b>CDC42,IKBK,IKBKE,MAPK8,NFATC1,NFATC4,PDPK1,PIK3CB,PIK3CD,PPP3CC,PPP3R1,RAC1</b>                                      |
| CD28 Signaling in T Helper Cells                         | 2Gy 4h           | 0.73          | 0.31        | -1.29        | AKT1,FOS,ITPR2,MAP2K1,MAP3K1,MAPK8,NFAT5,NFATC1,NFKB1,NFKBIA,PIK3CB,PIK3CD,PPP3CA,PPP3CB,PPP3CC,PPP3R1                  |
| CD40 Signaling                                           | 0.05Gy 2h        | 0.63          | 0.04        | NaN          | PTGS2                                                                                                                   |
| CD40 Signaling                                           | 0.05Gy 4h        | 0.00          | 0.04        | NaN          | FOS                                                                                                                     |
| <b>CD40 Signaling</b>                                    | <b>2Gy 2h</b>    | <b>1.47</b>   | <b>0.29</b> | <b>-1.13</b> | <b>IKBK,IKBKE,MAP2K5,MAPK8,PIK3CB,PIK3CD,PTGS2,TNFAIP3</b>                                                              |
| CD40 Signaling                                           | 2Gy 4h           | 1.17          | 0.39        | -1.27        | FOS,ICAM1,MAP2K1,MAP3K7,MAPK8,NFKB1,NFKBIA,PIK3CB,PIK3CD,PTGS2,TRAF3                                                    |
| Cdc42 Signaling                                          | 0.05Gy 4h        | 1.28          | 0.12        | NaN          | CDC42BPA,FOS,PRKCI,VAV2                                                                                                 |
| Cdc42 Signaling                                          | 2Gy 2h           | 0.00          | 0.12        | 0.00         | CDC42,ITGA5,LIMK2,MAPK8                                                                                                 |
| Cdc42 Signaling                                          | 2Gy 4h           | 0.68          | 0.32        | 0.33         | ATF2,CDC42BPA,CFL1,FOS,GSK3B,HLA-E,LIMK2,MAPK8,PRKCI,SRC,VAV2                                                           |
| CDK5 Signaling                                           | 0.05Gy 2h        | 0.49          | 0.02        | NaN          | EGR1                                                                                                                    |
| CDK5 Signaling                                           | 0.05Gy 4h        | 0.00          | 0.02        | NaN          | EGR1                                                                                                                    |
| CDK5 Signaling                                           | 2Gy 2h           | 0.68          | 0.20        | -1.41        | BDNF,CABLES1,CACNA1A,EGR1,MAPK7,MAPK8,PPP2CA,RRAS2                                                                      |
| CDK5 Signaling                                           | 2Gy 4h           | 0.91          | 0.34        | -0.54        | ABL1,ADCY8,CABLES1,CDK5R1,EGR1,HRAS,KRAS,MAP2K1,MAPK8,NGFR,PPP1CA,PPP2CA,PRKAR2A,RRAS2                                  |
| Cell Cycle Control of Chromosomal Replication            | 0.05Gy 2h        | 0.85          | 0.06        | NaN          | ORC2                                                                                                                    |
| Cell Cycle Control of Chromosomal Replication            | 2Gy 2h           | 0.75          | 0.25        | 1.00         | CDC6,ORC2,ORC3,PCNA                                                                                                     |
| Cell Cycle Control of Chromosomal Replication            | 2Gy 4h           | 1.10          | 0.44        | -0.38        | CDC6,CDK14,CDT1,LIG1,ORC1,ORC3,PCNA                                                                                     |
| <b>Cell Cycle Regulation by BTG Family Proteins</b>      | <b>0.05Gy 4h</b> | <b>1.72</b>   | <b>0.21</b> | <b>NaN</b>   | <b>BTG2,E2F4,E2F5</b>                                                                                                   |
| Cell Cycle Regulation by BTG Family Proteins             | 2Gy 2h           | 0.50          | 0.21        | NaN          | BTG2,CCNE1,PPP2CA                                                                                                       |
| <b>Cell Cycle Regulation by BTG Family Proteins</b>      | <b>2Gy 4h</b>    | <b>1.42</b>   | <b>0.50</b> | <b>-1.34</b> | <b>BTG2,CCNE1,CCNE2,CNOT7,E2F1,E2F5,PPP2CA</b>                                                                          |
| Cell Cycle: G1/S Checkpoint Regulation                   | 0.05Gy 2h        | 1.20          | 0.05        | NaN          | CDKN1B,MYC                                                                                                              |
| <b>Cell Cycle: G1/S Checkpoint Regulation</b>            | <b>0.05Gy 4h</b> | <b>2.68</b>   | <b>0.16</b> | <b>-0.82</b> | <b>CDKN1A,E2F4,E2F5,GNL3,MAX,MDM2,TGFB1</b>                                                                             |
| Cell Cycle: G1/S Checkpoint Regulation                   | 2Gy 2h           | 0.81          | 0.21        | 1.00         | CCNE1,CDKN1A,CDKN1B,GNL3,HDAC6,MAX,MDM2,MYC,SMAD3                                                                       |
| <b>Cell Cycle: G1/S Checkpoint Regulation</b>            | <b>2Gy 4h</b>    | <b>2.62</b>   | <b>0.46</b> | <b>-0.47</b> | <b>ABL1,ATM,BMI1,CCNE1,CCNE2,CDKN1A,CDKN2A,CDKN2B,CDKN2D,E2F1,E2F5,GNL3,GSK3B,MAX,MDM2,PA2G4,RBL2,SMAD3,SMAD4,TGFB1</b> |
| <b>Cell Cycle: G2/M DNA Damage Checkpoint Regulation</b> | <b>0.05Gy 4h</b> | <b>1.91</b>   | <b>0.18</b> | <b>-1.00</b> | <b>CDC25C,CDKN1A,MDM2,PPM1D</b>                                                                                         |
| Cell Cycle: G2/M DNA Damage Checkpoint Regulation        | 2Gy 2h           | 1.11          | 0.27        | 0.00         | AURKA,CDC25B,CDKN1A,CHEK1,MDM2,PPM1D                                                                                    |
| <b>Cell Cycle: G2/M DNA Damage Checkpoint Regulation</b> | <b>2Gy 4h</b>    | <b>1.53</b>   | <b>0.46</b> | <b>0.63</b>  | <b>ABL1,ATM,AURKA,CCNB1,CDC25B,CDKN1A,CDKN2A,GADD45A,MDM2,PPM1D</b>                                                     |
| Cellular Effects of Sildenafil (Viagra)                  | 0.05Gy 4h        | 0.00          | 0.02        | NaN          | ACTA2                                                                                                                   |
| Cellular Effects of Sildenafil (Viagra)                  | 2Gy 2h           | 0.00          | 0.07        | NaN          | ACTA2,CACNA1A,PDE4D                                                                                                     |
| Cellular Effects of Sildenafil (Viagra)                  | 2Gy 4h           | 0.00          | 0.11        | NaN          | ACTA2,ADCY8,CACNA1C,ITPR2,PRKAR2A                                                                                       |
| Ceramide Signaling                                       | 0.05Gy 4h        | 0.41          | 0.06        | NaN          | BCL2,FOS                                                                                                                |
| <b>Ceramide Signaling</b>                                | <b>2Gy 2h</b>    | <b>0.82</b>   | <b>0.22</b> | <b>2.65</b>  | <b>MAPK8,PIK3CB,PIK3CD,PPP2CA,RRAS2,S1PR3,TNFRSF1B</b>                                                                  |
| <b>Ceramide Signaling</b>                                | <b>2Gy 4h</b>    | <b>3.24</b>   | <b>0.53</b> | <b>-0.73</b> | <b>AKT1,BCL2,CTSD,FOS,HRAS,KRAS,MAP2K1,MAP3K1,MAPK8,NFKB1,NGFR,PIK3CB,PIK3CD,PPP2CA,RRAS2,TNFRSF11B,TNFRSF1B</b>        |
| Chemokine Signaling                                      | 0.05Gy 4h        | 0.57          | 0.07        | NaN          | FOS,GNAI2,RHOA                                                                                                          |
| Chemokine Signaling                                      | 2Gy 2h           | 0.00          | 0.14        | 0.00         | CAMK2G,CCL2,CCL7,LIMK2,MAPK8,RRAS2                                                                                      |
| Chemokine Signaling                                      | 2Gy 4h           | 1.02          | 0.35        | 0.26         | CAMK1,CFL1,FOS,GNAI2,GNAI3,HRAS,KRAS,LIMK2,MAP2K1,MAPK8,PTK2B,RHOA,ROCK2,RRAS2,SRC                                      |
| Cholecystokinin/Gastrin-mediated Signaling               | 0.05Gy 2h        | 0.35          | 0.02        | NaN          | PTGS2                                                                                                                   |

| Ingenuity Canonical Pathways                               | Model            | -log(p-value) | Ratio       | z-score      | Molecules                                                                                                                                 |
|------------------------------------------------------------|------------------|---------------|-------------|--------------|-------------------------------------------------------------------------------------------------------------------------------------------|
| Cholecystokinin/Gastrin-mediated Signaling                 | 0.05Gy 4h        | 0.92          | 0.08        | 1.34         | FOS,PRKCD,PRKCI,RHOA,RHOG                                                                                                                 |
| <b>Cholecystokinin/Gastrin-mediated Signaling</b>          | <b>2Gy 2h</b>    | <b>1.35</b>   | <b>0.23</b> | <b>-0.58</b> | <b>CDC42,ELK1,MAP2K5,MAPK7,MAPK8,MEF2D,PRKCE,PTGS2,RAC1,RHOB,RHOQ,RND3,RRAS2,SO</b>                                                       |
| <b>Cholecystokinin/Gastrin-mediated Signaling</b>          | <b>2Gy 4h</b>    | <b>1.95</b>   | <b>0.39</b> | <b>-1.04</b> | <b>ATF2,BCAR1,CREM,EGFR,ELK1,FOS,HRAS,ITPR2,KRAS,MAP2K1,MAPK8,PRKCD,PRKCE,PRKCI,PRKD3,PTGS2,PTK2B,RAC3,RHOA,ROCK1,ROCK2,RRAS2,SRC,SRF</b> |
| Cholesterol Biosynthesis I                                 | 2Gy 2h           | 0.27          | 0.20        | NaN          | SC5D                                                                                                                                      |
| Cholesterol Biosynthesis II (via 24,25-dihydrostanosterol) | 2Gy 2h           | 0.27          | 0.20        | NaN          | SC5D                                                                                                                                      |
| Cholesterol Biosynthesis III (via Desmosterol)             | 2Gy 2h           | 0.27          | 0.20        | NaN          | SC5D                                                                                                                                      |
| <b>Choline Biosynthesis III</b>                            | <b>2Gy 2h</b>    | <b>1.77</b>   | <b>0.50</b> | <b>0.00</b>  | <b>CHPT1,HMOX1,NAPEPLD,PLD1</b>                                                                                                           |
| Choline Biosynthesis III                                   | 2Gy 4h           | 0.00          | 0.25        | NaN          | HMOX1,PLD1                                                                                                                                |
| Chondroitin Sulfate Biosynthesis                           | 0.05Gy 4h        | 0.37          | 0.08        | NaN          | HS6ST1                                                                                                                                    |
| Chondroitin Sulfate Biosynthesis                           | 2Gy 2h           | 0.56          | 0.23        | NaN          | CHST11,CHST2,HS6ST1                                                                                                                       |
| Chondroitin Sulfate Biosynthesis                           | 2Gy 4h           | 0.00          | 0.08        | NaN          | HS6ST1                                                                                                                                    |
| Chondroitin Sulfate Biosynthesis (Late Stages)             | 0.05Gy 4h        | 0.39          | 0.08        | NaN          | HS6ST1                                                                                                                                    |
| Chondroitin Sulfate Biosynthesis (Late Stages)             | 2Gy 2h           | 0.63          | 0.25        | NaN          | CHST11,CHST2,HS6ST1                                                                                                                       |
| Chondroitin Sulfate Biosynthesis (Late Stages)             | 2Gy 4h           | 0.00          | 0.08        | NaN          | HS6ST1                                                                                                                                    |
| Chondroitin Sulfate Degradation (Metazoa)                  | 2Gy 4h           | 0.00          | 0.25        | NaN          | CEMIP                                                                                                                                     |
| Chronic Myeloid Leukemia Signaling                         | 0.05Gy 2h        | 1.05          | 0.04        | NaN          | CDKN1B,MYC                                                                                                                                |
| <b>Chronic Myeloid Leukemia Signaling</b>                  | <b>0.05Gy 4h</b> | <b>1.61</b>   | <b>0.11</b> | <b>NaN</b>   | <b>CDKN1A,E2F4,E2F5,MDM2,TGFB1,TGFBR1</b>                                                                                                 |
| <b>Chronic Myeloid Leukemia Signaling</b>                  | <b>2Gy 2h</b>    | <b>1.49</b>   | <b>0.24</b> | <b>NaN</b>   | <b>BCL2L1,CDKN1A,CDKN1B,HDAC6,IKBKB,IKBKE,MDM2,MYC,PIK3CB,PIK3CD,RRAS2,SMAD3,SO</b>                                                       |
| <b>Chronic Myeloid Leukemia Signaling</b>                  | <b>2Gy 4h</b>    | <b>2.12</b>   | <b>0.41</b> | <b>NaN</b>   | <b>ABL1,AKT1,BCL2L1,CDKN1A,CDKN2A,CRK,E2F1,E2F5,HRAS,KRAS,MAP2K1,MDM2,NFKB1,PA2G4,PIK3CB,PIK3CD,RBL2,RRAS2,SMAD3,SMAD4,TGFB1,TGFBR1</b>   |
| Circadian Rhythm Signaling                                 | 0.05Gy 4h        | 0.42          | 0.09        | NaN          | CRY1                                                                                                                                      |
| Circadian Rhythm Signaling                                 | 2Gy 2h           | 0.71          | 0.27        | NaN          | ATF4,CRY1,PER1                                                                                                                            |
| <b>Circadian Rhythm Signaling</b>                          | <b>2Gy 4h</b>    | <b>1.46</b>   | <b>0.55</b> | <b>NaN</b>   | <b>ARNTL,ATF2,ATF4,CRY1,NR1D1,PER3</b>                                                                                                    |
| Citrulline Biosynthesis                                    | 2Gy 2h           | 0.27          | 0.20        | NaN          | OAT                                                                                                                                       |
| Citrulline Biosynthesis                                    | 2Gy 4h           | 0.43          | 0.40        | NaN          | ALDH18A1,OAT                                                                                                                              |
| Clathrin-mediated Endocytosis Signaling                    | 0.05Gy 4h        | 0.59          | 0.06        | NaN          | ACTA2,ARF6,FGF5,LDLRAP1,MDM2                                                                                                              |
| <b>Clathrin-mediated Endocytosis Signaling</b>             | <b>2Gy 2h</b>    | <b>1.54</b>   | <b>0.22</b> | <b>NaN</b>   | <b>ACTA2,AP3B1,AP3S1,APOE,ARF6,CDC42,FGF2,FGF7,FGF9,ITGA5,LDLRAP1,MDM2,PDGFA,PIK3CB,PIK3CD,PPP3CC,PPP3R1,RAC1</b>                         |
| Clathrin-mediated Endocytosis Signaling                    | 2Gy 4h           | 0.43          | 0.27        | NaN          | ACTA2,AP3M1,ARF6,CSNK2B,FGF2,FGF5,HSPA8,ITGB8,LDLR,LDLRAP1,MDM2,PGF,PIK3CB,PIK3CD,PPP3CA,PPP3CB,PPP3CC,PPP3R1,RAB4A,SH3BP4,SRC,UBC        |
| CNTF Signaling                                             | 0.05Gy 4h        | 0.20          | 0.04        | NaN          | JAK2                                                                                                                                      |
| CNTF Signaling                                             | 2Gy 2h           | 1.03          | 0.26        | -1.63        | MTOR,PIK3CB,PIK3CD,RRAS2,SOS1,TYK2                                                                                                        |
| <b>CNTF Signaling</b>                                      | <b>2Gy 4h</b>    | <b>1.83</b>   | <b>0.48</b> | <b>-0.91</b> | <b>AKT1,CNTF,HRAS,IL6ST,JAK2,KRAS,LIFR,MAP2K1,PIK3CB,PIK3CD,RRAS2</b>                                                                     |
| Coagulation System                                         | 2Gy 2h           | 0.43          | 0.18        | -1.00        | BDKRB1,F3,PLAUR,SERPINE1                                                                                                                  |
| Coagulation System                                         | 2Gy 4h           | 0.00          | 0.09        | NaN          | SERPINA5,THBD                                                                                                                             |
| <b>Colanic Acid Building Blocks Biosynthesis</b>           | <b>0.05Gy 4h</b> | <b>2.29</b>   | <b>0.67</b> | <b>NaN</b>   | <b>GALK1,GPI</b>                                                                                                                          |
| Colanic Acid Building Blocks Biosynthesis                  | 2Gy 2h           | 0.44          | 0.33        | NaN          | UGDH                                                                                                                                      |
| Colanic Acid Building Blocks Biosynthesis                  | 2Gy 4h           | 0.80          | 0.67        | NaN          | GALK1,GPI                                                                                                                                 |
| Colorectal Cancer Metastasis Signaling                     | 0.05Gy 2h        | 0.82          | 0.02        | NaN          | IL6,MYC,PTGS2                                                                                                                             |
| Colorectal Cancer Metastasis Signaling                     | 0.05Gy 4h        | 0.58          | 0.06        | 0.82         | E2F4,FOS,GNG5,JAK2,RHOA,RHOG,TGFB1,TGFBR1                                                                                                 |
| Colorectal Cancer Metastasis Signaling                     | 2Gy 2h           | 0.33          | 0.15        | -0.94        | BCL2L1,CASP3,CDC42,IL6,IL6R,MAPK8,MMP15,MSH6,MYC,PIK3CB,PIK3CD,PTGER4,PTGS2,RAC1,RHOB,RHOQ,RND3,RRAS2,SMAD3,SOS1,TYK2                     |



| Ingenuity Canonical Pathways                               | Model            | -log(p-value) | Ratio       | z-score      | Molecules                                                                                                                                                                                                                                                       |
|------------------------------------------------------------|------------------|---------------|-------------|--------------|-----------------------------------------------------------------------------------------------------------------------------------------------------------------------------------------------------------------------------------------------------------------|
| Colorectal Cancer Metastasis Signaling                     | 2Gy 4h           | 1.14          | 0.31        | 0.33         | ADCY8,AKT1,APPL1,AXIN1,BCL2L1,CASP3,CTNNB1,EGFR,FOS,FZD1,GNG5,GSK3B,HRAS,IFNGR1,IL6R,IL6ST,JAK2,KRAS,LEF1,MAP2K1,MAPK8,MMP11,MSH6,NFKB1,PGF,PIK3CB,PIK3CD,PRKAR2A,PTGER1,PTGER2,PTGER3,PTGS2,RAC3,RHOA,RRAS2,SMAD2,SMAD3,SMAD4,SRC,TCF4,TCF7,TGFB1,TGFBR1,WNT5A |
| Communication between Innate and Adaptive Immune Cells     | 0.05Gy 2h        | 1.18          | 0.04        | NaN          | IL12A,IL6                                                                                                                                                                                                                                                       |
| Communication between Innate and Adaptive Immune Cells     | 2Gy 2h           | 0.00          | 0.04        | NaN          | CXCL8,IL6                                                                                                                                                                                                                                                       |
| Communication between Innate and Adaptive Immune Cells     | 2Gy 4h           | 0.00          | 0.04        | NaN          | HLA-E,IL12A                                                                                                                                                                                                                                                     |
| Complement System                                          | 2Gy 2h           | 0.00          | 0.08        | NaN          | CD55                                                                                                                                                                                                                                                            |
| Corticotropin Releasing Hormone Signaling                  | 0.05Gy 2h        | 0.31          | 0.01        | NaN          | PTGS2                                                                                                                                                                                                                                                           |
| Corticotropin Releasing Hormone Signaling                  | 0.05Gy 4h        | 0.45          | 0.06        | 1.00         | FOS,GNAI2,PRKCD,PRKCI                                                                                                                                                                                                                                           |
| Corticotropin Releasing Hormone Signaling                  | 2Gy 2h           | 0.38          | 0.16        | -1.00        | ATF4,BDNF,CACNA1A,ELK1,GLI3,GNAO1,JUND,MEF2D,NR4A1,PRKCE,PTGS2                                                                                                                                                                                                  |
| Corticotropin Releasing Hormone Signaling                  | 2Gy 4h           | 0.38          | 0.27        | 0.50         | ADCY8,ATF2,ATF4,CACNA1C,ELK1,FOS,GLI3,GNAI2,GNAI3,ITPR2,MAP2K1,NPR3,PRKAR2A,PRKCD,PRKCE,PRKCI,PRKD3,PTCH1,PTGS2                                                                                                                                                 |
| Creatine-phosphate Biosynthesis                            | 2Gy 4h           | 0.60          | 1.00        | NaN          | MAP4K4                                                                                                                                                                                                                                                          |
| CREB Signaling in Neurons                                  | 0.05Gy 4h        | 0.44          | 0.06        | NaN          | GNAI2,GNG5,PRKCD,PRKCI                                                                                                                                                                                                                                          |
| CREB Signaling in Neurons                                  | 2Gy 2h           | 0.00          | 0.14        | -1.13        | ATF4,CACNA1A,CAMK2G,ELK1,GNAO1,PIK3CB,PIK3CD,PRKCE,RRAS2,SOS1                                                                                                                                                                                                   |
| CREB Signaling in Neurons                                  | 2Gy 4h           | 0.61          | 0.29        | -0.23        | ADCY8,AKT1,ATF2,ATF4,CACNA1C,ELK1,GNAI2,GNAI3,GNG5,HRAS,ITPR2,KRAS,MAP2K1,PIK3CB,PIK3CD,PRKAR2A,PRKCD,PRKCE,PRKCI,PRKD3,RRAS2                                                                                                                                   |
| Crosstalk between Dendritic Cells and Natural Killer Cells | 0.05Gy 2h        | 1.26          | 0.05        | NaN          | IL12A,IL6                                                                                                                                                                                                                                                       |
| Crosstalk between Dendritic Cells and Natural Killer Cells | 0.05Gy 4h        | 0.00          | 0.02        | NaN          | ACTA2                                                                                                                                                                                                                                                           |
| Crosstalk between Dendritic Cells and Natural Killer Cells | 2Gy 2h           | 0.00          | 0.12        | NaN          | ACTA2,CAMK2G,FAS,IL6,TNFRSF1B                                                                                                                                                                                                                                   |
| Crosstalk between Dendritic Cells and Natural Killer Cells | 2Gy 4h           | 0.00          | 0.22        | 1.63         | ACTA2,FAS,HLA-E,IL12A,MICA,NECTIN2,NFKB1,TNFRSF1B,TNFSF10                                                                                                                                                                                                       |
| CTLA4 Signaling in Cytotoxic T Lymphocytes                 | 0.05Gy 4h        | 0.21          | 0.05        | NaN          | JAK2                                                                                                                                                                                                                                                            |
| CTLA4 Signaling in Cytotoxic T Lymphocytes                 | 2Gy 2h           | 0.00          | 0.14        | NaN          | PIK3CB,PIK3CD,PPP2CA                                                                                                                                                                                                                                            |
| CTLA4 Signaling in Cytotoxic T Lymphocytes                 | 2Gy 4h           | 0.31          | 0.27        | NaN          | AKT1,HLA-E,JAK2,PIK3CB,PIK3CD,PPP2CA                                                                                                                                                                                                                            |
| CXCR4 Signaling                                            | 0.05Gy 2h        | 0.29          | 0.01        | NaN          | EGR1                                                                                                                                                                                                                                                            |
| <b>CXCR4 Signaling</b>                                     | <b>0.05Gy 4h</b> | <b>1.87</b>   | <b>0.11</b> | <b>1.89</b>  | <b>EGR1,FOS,GNAI2,GNG5,PRKCD,PRKCI,RHOA,RHOG</b>                                                                                                                                                                                                                |
| CXCR4 Signaling                                            | 2Gy 2h           | 0.58          | 0.17        | -0.30        | CDC42,EGR1,ELK1,GNAO1,MAPK8,PIK3CB,PIK3CD,PRKCE,RAC1,RHOB,RHOQ,RND3,RRAS2                                                                                                                                                                                       |
| <b>CXCR4 Signaling</b>                                     | <b>2Gy 4h</b>    | <b>1.60</b>   | <b>0.36</b> | <b>-0.60</b> | <b>ADCY8,AKT1,BCAR1,CRK,EGR1,ELK1,FOS,GNAI2,GNAI3,GNG5,HRAS,ITPR2,KRAS,MAP2K1,MAPK8,PIK3CB,PIK3CD,PRKCD,PRKCE,PRKCI,PRKD3,RAC3,RHOA,ROCK1,ROCK2,RRAS2,SRC</b>                                                                                                   |
| Cyclins and Cell Cycle Regulation                          | 0.05Gy 2h        | 0.52          | 0.03        | NaN          | CDKN1B                                                                                                                                                                                                                                                          |
| Cyclins and Cell Cycle Regulation                          | 0.05Gy 4h        | 1.13          | 0.11        | -1.00        | CDKN1A,E2F4,E2F5,TGFB1                                                                                                                                                                                                                                          |
| Cyclins and Cell Cycle Regulation                          | 2Gy 2h           | 0.00          | 0.13        | -1.00        | CCNE1,CDKN1A,CDKN1B,HDAC6,PPP2CA                                                                                                                                                                                                                                |
| <b>Cyclins and Cell Cycle Regulation</b>                   | <b>2Gy 4h</b>    | <b>2.21</b>   | <b>0.45</b> | <b>-1.81</b> | <b>ABL1,ATM,CCNA2,CCNB1,CCNE1,CCNE2,CCNH,CDKN1A,CDKN2A,CDKN2B,CDKN2D,E2F1,E2F5,GSK3B,PA2G4,PPP2CA,TGFB1</b>                                                                                                                                                     |
| Cytotoxic T Lymphocyte-mediated Apoptosis of Target Cells  | 0.05Gy 4h        | 0.39          | 0.08        | NaN          | BCL2                                                                                                                                                                                                                                                            |

| Ingenuity Canonical Pathways                                                                                 | Model            | -log(p-value) | Ratio       | z-score     | Molecules                                                                                                                              |
|--------------------------------------------------------------------------------------------------------------|------------------|---------------|-------------|-------------|----------------------------------------------------------------------------------------------------------------------------------------|
| Cytotoxic T Lymphocyte-mediated Apoptosis of Target Cells                                                    | 2Gy 2h           | 0.63          | 0.25        | NaN         | CASP3,CASP8,FAS                                                                                                                        |
| Cytotoxic T Lymphocyte-mediated Apoptosis of Target Cells                                                    | 2Gy 4h           | 0.80          | 0.42        | 1.00        | BCL2,BID,CASP3,FAS,HLA-E                                                                                                               |
| Death Receptor Signaling                                                                                     | 0.05Gy 4h        | 0.65          | 0.08        | NaN         | ACTA2,BCL2,LMNA                                                                                                                        |
| <b>Death Receptor Signaling</b>                                                                              | <b>2Gy 2h</b>    | <b>2.76</b>   | <b>0.33</b> | <b>0.83</b> | <b>ACTA2,BIRC2,CASP3,CASP8,CFLAR,FAS,IKBKB,IKBKE,MAPK8,PARP2,RIPK1,TNFRSF10B,TNFRSF1B</b>                                              |
| <b>Death Receptor Signaling</b>                                                                              | <b>2Gy 4h</b>    | <b>3.46</b>   | <b>0.51</b> | <b>1.34</b> | <b>ACTA2,BCL2,BID,CASP3,CFLAR,FAS,LMNA,MAP4K4,MAPK8,NFKB1,NFKBIA,PARP2,PARP9,RIPK1,ROCK1,TNFRSF10A,TNFRSF10B,TNFRSF1B,TNFSF10,XIAP</b> |
| Dendritic Cell Maturation                                                                                    | 0.05Gy 2h        | 0.80          | 0.03        | NaN         | IL12A,IL6                                                                                                                              |
| Dendritic Cell Maturation                                                                                    | 0.05Gy 4h        | 0.00          | 0.01        | NaN         | JAK2                                                                                                                                   |
| Dendritic Cell Maturation                                                                                    | 2Gy 2h           | 0.00          | 0.13        | -0.63       | ATF4,CD58,IKBKB,IKBKE,IL6,MAPK8,PIK3CB,PIK3CD,RELB,TNFRSF1B                                                                            |
| Dendritic Cell Maturation                                                                                    | 2Gy 4h           | 0.00          | 0.21        | -0.78       | AKT1,ATF2,ATF4,HLA-E,ICAM1,IL12A,JAK2,LEPR,MAPK8,NFKB1,NFKBIA,NGFR,PIK3CB,PIK3CD,TNFRSF11B,TNFRSF1B                                    |
| Dermatan Sulfate Biosynthesis                                                                                | 0.05Gy 4h        | 0.37          | 0.08        | NaN         | HS6ST1                                                                                                                                 |
| Dermatan Sulfate Biosynthesis                                                                                | 2Gy 2h           | 0.56          | 0.23        | NaN         | CHST11,CHST2,HS6ST1                                                                                                                    |
| Dermatan Sulfate Biosynthesis                                                                                | 2Gy 4h           | 0.00          | 0.08        | NaN         | HS6ST1                                                                                                                                 |
| Dermatan Sulfate Biosynthesis (Late Stages)                                                                  | 0.05Gy 4h        | 0.39          | 0.08        | NaN         | HS6ST1                                                                                                                                 |
| Dermatan Sulfate Biosynthesis (Late Stages)                                                                  | 2Gy 2h           | 0.63          | 0.25        | NaN         | CHST11,CHST2,HS6ST1                                                                                                                    |
| Dermatan Sulfate Biosynthesis (Late Stages)                                                                  | 2Gy 4h           | 0.00          | 0.08        | NaN         | HS6ST1                                                                                                                                 |
| Dermatan Sulfate Degradation (Metazoa)                                                                       | 2Gy 4h           | 0.43          | 0.40        | NaN         | CEMIP,IDUA                                                                                                                             |
| Differential Regulation of Cytokine Production in Intestinal Epithelial Cells by IL-17A and IL-17F           | 0.05Gy 2h        | 0.80          | 0.06        | NaN         | IL12A                                                                                                                                  |
| Differential Regulation of Cytokine Production in Intestinal Epithelial Cells by IL-17A and IL-17F           | 2Gy 2h           | 0.00          | 0.11        | NaN         | CCL2,CXCL1                                                                                                                             |
| Differential Regulation of Cytokine Production in Intestinal Epithelial Cells by IL-17A and IL-17F           | 2Gy 4h           | 0.00          | 0.06        | NaN         | IL12A                                                                                                                                  |
| <b>Differential Regulation of Cytokine Production in Macrophages and T Helper Cells by IL-17A and IL-17F</b> | <b>0.05Gy 2h</b> | <b>2.14</b>   | <b>0.14</b> | <b>NaN</b>  | <b>IL12A,IL6</b>                                                                                                                       |
| Differential Regulation of Cytokine Production in Macrophages and T Helper Cells by IL-17A and IL-17F        | 2Gy 2h           | 0.50          | 0.21        | NaN         | CCL2,CXCL1,IL6                                                                                                                         |
| Differential Regulation of Cytokine Production in Macrophages and T Helper Cells by IL-17A and IL-17F        | 2Gy 4h           | 0.00          | 0.07        | NaN         | IL12A                                                                                                                                  |
| D-myo-inositol (1,3,4)-trisphosphate Biosynthesis                                                            | 2Gy 4h           | 0.24          | 0.33        | NaN         | PTEN                                                                                                                                   |
| D-myo-inositol (1,4,5)-trisphosphate Degradation                                                             | 2Gy 2h           | 0.44          | 0.33        | NaN         | IMPA2                                                                                                                                  |
| D-myo-inositol (1,4,5,6)-Tetrakisphosphate Biosynthesis                                                      | 0.05Gy 2h        | 0.76          | 0.05        | NaN         | SOCS3                                                                                                                                  |
| D-myo-inositol (1,4,5,6)-Tetrakisphosphate Biosynthesis                                                      | 0.05Gy 4h        | 0.69          | 0.10        | NaN         | CDC25C,PTPN13                                                                                                                          |
| D-myo-inositol (1,4,5,6)-Tetrakisphosphate Biosynthesis                                                      | 2Gy 2h           | 0.51          | 0.20        | -1.00       | CDC25B,DUSP1,PTPN2,SOCS3                                                                                                               |
| <b>D-myo-inositol (1,4,5,6)-Tetrakisphosphate Biosynthesis</b>                                               | <b>2Gy 4h</b>    | <b>1.39</b>   | <b>0.45</b> | <b>0.33</b> | <b>CDC25B,DUSP1,NUDT11,PAWR,PPP1CA,PPP3CA,PTEN,PTPN13,SOCS3</b>                                                                        |
| D-myo-inositol (3,4,5,6)-tetrakisphosphate Biosynthesis                                                      | 0.05Gy 2h        | 0.76          | 0.05        | NaN         | SOCS3                                                                                                                                  |
| D-myo-inositol (3,4,5,6)-tetrakisphosphate Biosynthesis                                                      | 0.05Gy 4h        | 0.69          | 0.10        | NaN         | CDC25C,PTPN13                                                                                                                          |

| Ingenuity Canonical Pathways                                      | Model            | <b>-log(p-value)</b> | <b>Ratio</b> | <b>z-score</b> | <b>Molecules</b>                                                                                                                                                                                 |
|-------------------------------------------------------------------|------------------|----------------------|--------------|----------------|--------------------------------------------------------------------------------------------------------------------------------------------------------------------------------------------------|
| D-myo-inositol (3,4,5,6)-tetrakisphosphate Biosynthesis           | 2Gy 2h           | 0.51                 | 0.20         | -1.00          | CDC25B,DUSP1,PTPN2,SOCS3                                                                                                                                                                         |
| <b>D-myo-inositol (3,4,5,6)-tetrakisphosphate Biosynthesis</b>    | <b>2Gy 4h</b>    | <b>1.39</b>          | <b>0.45</b>  | <b>0.33</b>    | <b>CDC25B,DUSP1,NUDT11,PAWR,PPP1CA,PPP3CA,PTEN,PTPN13,SOCS3</b>                                                                                                                                  |
| D-myo-inositol-5-phosphate Metabolism                             | 0.05Gy 2h        | 0.69                 | 0.04         | NaN            | SOCS3                                                                                                                                                                                            |
| D-myo-inositol-5-phosphate Metabolism                             | 0.05Gy 4h        | 0.57                 | 0.08         | NaN            | CDC25C,PTPN13                                                                                                                                                                                    |
| D-myo-inositol-5-phosphate Metabolism                             | 2Gy 2h           | 0.35                 | 0.17         | -1.00          | CDC25B,DUSP1,PTPN2,SOCS3                                                                                                                                                                         |
| D-myo-inositol-5-phosphate Metabolism                             | 2Gy 4h           | 0.92                 | 0.38         | 0.33           | CDC25B,DUSP1,NUDT11,PAWR,PPP1CA,PPP3CA,PTEN,PTPN13,SOCS3                                                                                                                                         |
| DNA damage-induced 14-3-3 $\beta$ Signaling                       | 2Gy 2h           | 0.00                 | 0.09         | NaN            | CCNE1                                                                                                                                                                                            |
| DNA damage-induced 14-3-3 $\beta$ Signaling                       | 2Gy 4h           | 0.94                 | 0.46         | NaN            | AKT1,ATM,CCNB1,CCNE1,CCNE2                                                                                                                                                                       |
| <b>DNA Double-Strand Break Repair by Homologous Recombination</b> | <b>2Gy 4h</b>    | <b>1.42</b>          | <b>0.67</b>  | <b>NaN</b>     | <b>ABL1,ATM,BRCA2,LIG1</b>                                                                                                                                                                       |
| DNA Double-Strand Break Repair by Non-Homologous End Joining      | 2Gy 4h           | 0.00                 | 0.20         | NaN            | ATM                                                                                                                                                                                              |
| DNA Methylation and Transcriptional Repression Signaling          | 2Gy 2h           | 0.38                 | 0.20         | NaN            | MTA1,MTA2                                                                                                                                                                                        |
| DNA Methylation and Transcriptional Repression Signaling          | 2Gy 4h           | 0.00                 | 0.20         | NaN            | MECP2,RBBP7                                                                                                                                                                                      |
| Docosahexaenoic Acid (DHA) Signaling                              | 0.05Gy 4h        | 0.22                 | 0.05         | NaN            | BCL2                                                                                                                                                                                             |
| Docosahexaenoic Acid (DHA) Signaling                              | 2Gy 2h           | 0.79                 | 0.24         | NaN            | BCL2L1,CASP3,PDPK1,PIK3CB,PIK3CD                                                                                                                                                                 |
| Docosahexaenoic Acid (DHA) Signaling                              | 2Gy 4h           | 0.89                 | 0.38         | NaN            | AKT1,BCL2,BCL2L1,BID,CASP3,GSK3B,PIK3CB,PIK3CD                                                                                                                                                   |
| Dolichyl-diphosphooligosaccharide Biosynthesis                    | 2Gy 2h           | 0.58                 | 0.50         | NaN            | ALG5                                                                                                                                                                                             |
| Dopamine Receptor Signaling                                       | 2Gy 2h           | 0.00                 | 0.08         | NaN            | GCH1,PPP2CA                                                                                                                                                                                      |
| Dopamine Receptor Signaling                                       | 2Gy 4h           | 0.00                 | 0.19         | NaN            | ADCY8,GCH1,PPP1CA,PPP2CA,PRKAR2A                                                                                                                                                                 |
| Dopamine-DARPP32 Feedback in cAMP Signaling                       | 0.05Gy 4h        | 0.28                 | 0.05         | NaN            | GNAI2,PRKCD,PRKCI                                                                                                                                                                                |
| Dopamine-DARPP32 Feedback in cAMP Signaling                       | 2Gy 2h           | 0.00                 | 0.09         | -0.82          | ATF4,CACNA1A,PPP2CA,PPP3CC,PPP3R1,PRKCE                                                                                                                                                          |
| <b>Dopamine-DARPP32 Feedback in cAMP Signaling</b>                | <b>2Gy 4h</b>    | <b>1.41</b>          | <b>0.35</b>  | <b>-1.89</b>   | <b>ADCY8,ATF2,ATF4,ATP2A2,CACNA1C,CREM,GNAI2,GNAI3,ITPR2,KCNJ15,KCNJ8,PAWR,PPP1CA,PPP2CA,PPP3CA,PPP3CB,PPP3CC,PPP3R1,PRKAR2A,PRKCD,PRKCE,PRKCI,PRKD3</b>                                         |
| EGF Signaling                                                     | 0.05Gy 4h        | 0.00                 | 0.03         | NaN            | FOS                                                                                                                                                                                              |
| EGF Signaling                                                     | 2Gy 2h           | 0.54                 | 0.19         | -0.82          | ELK1,MAPK8,MTOR,PIK3CB,PIK3CD,SOS1                                                                                                                                                               |
| <b>EGF Signaling</b>                                              | <b>2Gy 4h</b>    | <b>1.81</b>          | <b>0.44</b>  | <b>0.00</b>    | <b>AKT1,CSNK2B,EGFR,ELK1,FOS,HRAS,ITPR2,MAP2K1,MAP3K1,MAPK8,PIK3CB,PIK3CD,SRF</b>                                                                                                                |
| Eicosanoid Signaling                                              | 0.05Gy 2h        | 0.61                 | 0.03         | NaN            | PTGS2                                                                                                                                                                                            |
| Eicosanoid Signaling                                              | 2Gy 2h           | 0.00                 | 0.10         | NaN            | PNPLA8,PTGER4,PTGS2                                                                                                                                                                              |
| Eicosanoid Signaling                                              | 2Gy 4h           | 0.00                 | 0.23         | NaN            | PNPLA8,PTGER1,PTGER2,PTGER3,PTGES,PTGES2,PTGS2                                                                                                                                                   |
| EIF2 Signaling                                                    | 0.05Gy 2h        | 0.25                 | 0.01         | NaN            | MYC                                                                                                                                                                                              |
| EIF2 Signaling                                                    | 0.05Gy 4h        | 0.31                 | 0.05         | NaN            | ACTA2,BCL2,PTBP1,RPL28                                                                                                                                                                           |
| EIF2 Signaling                                                    | 2Gy 2h           | 0.00                 | 0.11         | -0.38          | ACTA2,ATF4,MYC,PDPK1,PIK3CB,PIK3CD,PTBP1,RRAS2,SOS1                                                                                                                                              |
| <b>EIF2 Signaling</b>                                             | <b>2Gy 4h</b>    | <b>1.86</b>          | <b>0.36</b>  | <b>1.63</b>    | <b>ACTA2,AKT1,ATF4,BCL2,DDIT3,EIF2AK1,EIF2AK2,EIF4A2,FAU,GSK3B,HRAS,KRAS,MAP2K1,NOX4,PIK3CB,PIK3CD,PPP1CA,PTBP1,RPL10,RPL28,RPL30,RPL36,RPL37A,RPL41,RPLP1,RPS19,RPS2,RPS29,RRAS2,TRIB3,XIAP</b> |
| <b>Endocannabinoid Cancer Inhibition Pathway</b>                  | <b>0.05Gy 2h</b> | <b>1.46</b>          | <b>0.04</b>  | <b>NaN</b>     | <b>CDKN1B,MYC,SNAI2</b>                                                                                                                                                                          |
| Endocannabinoid Cancer Inhibition Pathway                         | 0.05Gy 4h        | 0.00                 | 0.04         | NaN            | CDKN1A,GNAI2,RHOA                                                                                                                                                                                |
| Endocannabinoid Cancer Inhibition Pathway                         | 2Gy 2h           | 0.53                 | 0.17         | 0.28           | ATF4,CASP3,CASP8,CCNE1,CDKN1A,CDKN1B,GNAO1,MAP2K5,MTOR,MYC,PIK3CB,PIK3CD,SNAI2                                                                                                                   |

| Inguenuity Canonical Pathways                    | Model         | $-\log(p\text{-value})$ | Ratio       | z-score      | Molecules                                                                                                                                                                            |
|--------------------------------------------------|---------------|-------------------------|-------------|--------------|--------------------------------------------------------------------------------------------------------------------------------------------------------------------------------------|
| <b>Endocannabinoid Cancer Inhibition Pathway</b> | <b>2Gy 4h</b> | <b>1.70</b>             | <b>0.36</b> | <b>0.96</b>  | <b>ADCY8,AKT1,ATF2,ATF4,CASP3,CCNE1,CCNE2,CDKN1A,CTNNB1,DDIT3,GNAI2,GNAI3,GSK3B,HI<br/>F1A,LEF1,MAP2K1,PGF,PIK3CB,PIK3CD,PRKAR2A,RHOA,ROCK1,ROCK2,SNAI2,SRC,TCF4,TCF7,<br/>TRIB3</b> |
| Endocannabinoid Developing Neuron Pathway        | 0.05Gy 2h     | 0.38                    | 0.02        | NaN          | CDKN1B                                                                                                                                                                               |
| Endocannabinoid Developing Neuron Pathway        | 0.05Gy 4h     | 0.36                    | 0.05        | NaN          | GNAI2,GNG5,RHOA                                                                                                                                                                      |
| Endocannabinoid Developing Neuron Pathway        | 2Gy 2h        | 0.77                    | 0.19        | -0.91        | ATF4,CDKN1B,GNAO1,MAP2K5,MAPK7,MAPK8,MTOR,PIK3CB,PIK3CD,RAC1,RRAS2                                                                                                                   |
| Endocannabinoid Developing Neuron Pathway        | 2Gy 4h        | 1.25                    | 0.35        | 0.69         | ADCY8,AKT1,ATF2,ATF4,CTNNB1,GNAI2,GNAI3,GNG5,GSK3B,HRAS,KRAS,MAP2K1,MAPK8,PIK3<br>CB,PIK3CD,PRKAR2A,RAC3,RHOA,RRAS2,SRC                                                              |
| Endocannabinoid Neuronal Synapse Pathway         | 0.05Gy 2h     | 0.46                    | 0.02        | NaN          | PTGS2                                                                                                                                                                                |
| Endocannabinoid Neuronal Synapse Pathway         | 0.05Gy 4h     | 0.24                    | 0.04        | NaN          | GNAI2,GNG5                                                                                                                                                                           |
| Endocannabinoid Neuronal Synapse Pathway         | 2Gy 2h        | 0.53                    | 0.18        | -0.71        | CACNA1A,GNAO1,MAPK7,MAPK8,NAPEPLD,PPP3CC,PPP3R1,PTGS2                                                                                                                                |
| Endocannabinoid Neuronal Synapse Pathway         | 2Gy 4h        | 0.49                    | 0.29        | -1.39        | ADCY8,CACNA1C,DAGLA,GNAI2,GNAI3,GNG5,MAPK8,PPP3CA,PPP3CB,PPP3CC,PPP3R1,PRKAR<br>2A,PTGS2                                                                                             |
| Endometrial Cancer Signaling                     | 0.05Gy 2h     | 0.57                    | 0.03        | NaN          | MYC                                                                                                                                                                                  |
| Endometrial Cancer Signaling                     | 2Gy 2h        | 0.76                    | 0.21        | -1.13        | ELK1,MYC,PDPK1,PIK3CB,PIK3CD,RRAS2,SOS1                                                                                                                                              |
| <b>Endometrial Cancer Signaling</b>              | <b>2Gy 4h</b> | <b>1.68</b>             | <b>0.42</b> | <b>-0.30</b> | <b>AKT1,AXIN1,CTNNB1,ELK1,FOXO3,GSK3B,HRAS,KRAS,LEF1,MAP2K1,PIK3CB,PIK3CD,PTEN,RR<br/>AS2</b>                                                                                        |
| Endoplasmic Reticulum Stress Pathway             | 2Gy 2h        | 0.71                    | 0.27        | NaN          | ATF4,CASP3,MAPK8                                                                                                                                                                     |
| <b>Endoplasmic Reticulum Stress Pathway</b>      | <b>2Gy 4h</b> | <b>1.46</b>             | <b>0.55</b> | <b>0.00</b>  | <b>ATF4,ATF6,CALR,CASP3,DDIT3,MAPK8</b>                                                                                                                                              |
| Endothelin-1 Signaling                           | 0.05Gy 2h     | 0.75                    | 0.02        | NaN          | MYC,PTGS2                                                                                                                                                                            |
| Endothelin-1 Signaling                           | 0.05Gy 4h     | 0.34                    | 0.05        | 1.00         | FOS,GNAI2,PRKCD,PRKCI                                                                                                                                                                |
| Endothelin-1 Signaling                           | 2Gy 2h        | 1.22                    | 0.21        | -1.21        | CASP3,CASP8,EDN1,GNAO1,HMOX1,MAPK7,MAPK8,MYC,NAPEPLD,PIK3CB,PIK3CD,PLD1,PNPL<br>A8,PRKCE,PTGS2,RRAS2,SOS1                                                                            |
| Endothelin-1 Signaling                           | 2Gy 4h        | 0.41                    | 0.27        | -0.85        | ADCY8,CASP3,FOS,GNAI2,GNAI3,HMOX1,HRAS,ITPR2,KRAS,MAPK8,PIK3CB,PIK3CD,PLD1,PNPL<br>A8,PRKCD,PRKCE,PRKCI,PRKD3,PTGER2,PTGS2,RRAS2,SRC                                                 |
| eNOS Signaling                                   | 0.05Gy 4h     | 0.31                    | 0.05        | NaN          | AQP5,PRKCD,PRKCI,SLC7A1                                                                                                                                                              |
| eNOS Signaling                                   | 2Gy 2h        | 0.00                    | 0.12        | -1.90        | BDKRB1,CASP3,CASP8,CHRM3,HSPA9,LPAR6,PDPK1,PIK3CB,PIK3CD,PRKCE                                                                                                                       |
| eNOS Signaling                                   | 2Gy 4h        | 0.33                    | 0.26        | -1.00        | ADCY8,AKT1,AQP3,AQP5,CASP3,CCNA2,FLT1,HSP90AB1,HSPA6,HSPA8,ITPR2,LPAR1,PGF,PIK3<br>CB,PIK3CD,PRKAR2A,PRKCD,PRKCE,PRKCI,PRKD3,SLC7A1,STUB1                                            |
| Ephrin A Signaling                               | 0.05Gy 4h     | 1.15                    | 0.13        | NaN          | EFNA4,RHOA,VAV2                                                                                                                                                                      |
| Ephrin A Signaling                               | 2Gy 2h        | 0.67                    | 0.22        | NaN          | CDC42,EPHA2,PIK3CB,PIK3CD,RAC1                                                                                                                                                       |
| <b>Ephrin A Signaling</b>                        | <b>2Gy 4h</b> | <b>1.39</b>             | <b>0.44</b> | <b>NaN</b>   | <b>BCAR1,CFL1,EPHA2,NGFR,PIK3CB,PIK3CD,RHOA,ROCK1,ROCK2,VAV2</b>                                                                                                                     |
| Ephrin B Signaling                               | 0.05Gy 4h     | 1.24                    | 0.11        | NaN          | GNAI2,GNG5,RHOA,VAV2                                                                                                                                                                 |
| Ephrin B Signaling                               | 2Gy 2h        | 0.43                    | 0.17        | 0.82         | CDC42,EFNB1,EPHB3,EPHB4,GNAO1,RAC1                                                                                                                                                   |
| <b>Ephrin B Signaling</b>                        | <b>2Gy 4h</b> | <b>1.44</b>             | <b>0.40</b> | <b>0.58</b>  | <b>AXIN1,CFL1,CTNNB1,EFNB1,EPHB4,GNAI2,GNAI3,GNG5,HRAS,RAC3,RHOA,ROCK1,ROCK2,VAV<br/>2</b>                                                                                           |
| Ephrin Receptor Signaling                        | 0.05Gy 4h     | 0.89                    | 0.07        | 1.34         | EFNA4,GNAI2,GNG5,JAK2,PTPN13,RHOA                                                                                                                                                    |
| Ephrin Receptor Signaling                        | 2Gy 2h        | 0.77                    | 0.18        | -1.27        | ATF4,CDC42,DOK1,EFNB1,EPHA2,EPHB3,EPHB4,GNAO1,ITGA5,LIMK2,NCK1,PDGFA,RAC1,RRAS<br>2,SOS1                                                                                             |
| <b>Ephrin Receptor Signaling</b>                 | <b>2Gy 4h</b> | <b>1.65</b>             | <b>0.35</b> | <b>0.21</b>  | <b>ABL1,AKT1,ATF2,ATF4,AXIN1,BCAR1,CFL1,CRK,EFNB1,EPHA2,EPHB4,GNAI2,GNAI3,GNG5,HRA<br/>S,JAK2,KRAS,LIMK2,MAP2K1,MAP4K4,PGF,PTPN13,RAC3,RHOA,ROCK1,ROCK2,RRAS2,SORBS<br/>1,SRC</b>    |
| Epithelial Adherens Junction Signaling           | 0.05Gy 2h     | 0.33                    | 0.02        | NaN          | SNAI2                                                                                                                                                                                |
| Epithelial Adherens Junction Signaling           | 0.05Gy 4h     | 0.84                    | 0.08        | NaN          | ACTA2,RHOA,TGFBR1,VAV2,YES1                                                                                                                                                          |
| Epithelial Adherens Junction Signaling           | 2Gy 2h        | 0.00                    | 0.14        | NaN          | ACTA2,ACVR2A,CDC42,RAC1,RRAS2,SNAI1,SNAI2,TUBB2A,TUBB4B                                                                                                                              |

| Ingenuity Canonical Pathways                      | Model                  | -log(p-value)        | Ratio                | z-score               | Molecules                                                                                                                                                            |
|---------------------------------------------------|------------------------|----------------------|----------------------|-----------------------|----------------------------------------------------------------------------------------------------------------------------------------------------------------------|
| <b>Epithelial Adherens Junction Signaling</b>     | <b>2Gy 4h</b>          | <b>2.52</b>          | <b>0.41</b>          | <b>NaN</b>            | <b>ACTA2,ACVR1,ACVR1B,ACVR2A,AKT1,BMPR2,CRK,CTNNA1,EGFR,HRAS,KRAS,LEF1,NECTIN1,NECTIN2,NOTCH4,PTEN,RHOA,RRAS2,SNAI2,SORBS1,Src,TCF4,TCF7,TGFBR1,TUBB2A,VAV2,YES1</b> |
| ErbB Signaling                                    | 0.05Gy 4h              | 0.44                 | 0.06                 | NaN                   | FOS,PRKCD,PRKCI                                                                                                                                                      |
| <b>ErbB Signaling</b>                             | <b>2Gy 2h</b>          | <b>1.34</b>          | <b>0.24</b>          | <b>-0.58</b>          | <b>AREG,CDC42,ELK1,MAPK8,MTOR,NCK1,PDPK1,PIK3CB,PIK3CD,PRKCE,RRAS2,SOS1</b>                                                                                          |
| ErbB Signaling                                    | 2Gy 4h                 | 0.73                 | 0.31                 | 0.00                  | AKT1,EGFR,ELK1,FOS,GSK3B,HRAS,KRAS,MAP2K1,MAPK8,PIK3CB,PIK3CD,PRKCD,PRKCE,PRKCI,PRKD3,RRAS2                                                                          |
| <b>ErbB2-ErbB3 Signaling</b>                      | <b>0.05Gy 2h</b>       | <b>1.45</b>          | <b>0.06</b>          | <b>NaN</b>            | <b>CDKN1B,MYC</b>                                                                                                                                                    |
| <b>ErbB2-ErbB3 Signaling</b>                      | <b>2Gy 2h</b>          | <b>1.55</b>          | <b>0.28</b>          | <b>-1.41</b>          | <b>CDKN1B,ELK1,MYC,PDPK1,PIK3CB,PIK3CD,RRAS2,SOS1,TYK2</b>                                                                                                           |
| ErbB2-ErbB3 Signaling                             | 2Gy 4h                 | 0.81                 | 0.34                 | -0.30                 | AKT1,ELK1,GSK3B,HRAS,KRAS,MAP2K1,PIK3CB,PIK3CD,PTEN,RRAS2,SP1                                                                                                        |
| ErbB4 Signaling                                   | 0.05Gy 4h              | 0.36                 | 0.06                 | NaN                   | PRKCD,PRKCI                                                                                                                                                          |
| ErbB4 Signaling                                   | 2Gy 2h                 | 0.43                 | 0.17                 | -1.63                 | PDPK1,PIK3CB,PIK3CD,PRKCE,RRAS2,SOS1                                                                                                                                 |
| <b>ErbB4 Signaling</b>                            | <b>2Gy 4h</b>          | <b>1.44</b>          | <b>0.40</b>          | <b>0.00</b>           | <b>ADAM17,AKT1,HRAS,KRAS,MAP2K1,PIK3CB,PIK3CD,PRKCD,PRKCE,PRKCI,PRKD3,PSEN2,RRAS2,YAP1</b>                                                                           |
| ERK/MAPK Signaling                                | 0.05Gy 2h              | 0.30                 | 0.01                 | NaN                   | MYC                                                                                                                                                                  |
| ERK/MAPK Signaling                                | 0.05Gy 4h              | 0.43                 | 0.05                 | 1.00                  | FOS,NFATC1,PRKCD,PRKCI                                                                                                                                               |
| ERK/MAPK Signaling                                | 2Gy 2h                 | 0.86                 | 0.19                 | -0.54                 | ATF4,DUSP1,DUSP6,ELK1,ITGA5,MYC,NFATC1,PIK3CB,PIK3CD,PPP2CA,PRKCE,RAC1,RRAS2,SRF                                                                                     |
| <b>ERK/MAPK Signaling</b>                         | <b>2Gy 4h</b>          | <b>1.84</b>          | <b>0.37</b>          | <b>-0.58</b>          | <b>ATF2,ATF4,BCAR1,CRK,DUSP1,DUSP6,ELK1,ETS1,ETS2,FOS,HRAS,KRAS,MAP2K1,NFATC1,PIK3CB,PIK3CD,PPP1CA,PPP2CA,PRKAR2A,PRKCD,PRKCE,PRKCI,PTK2B,RAC3,RRAS2,Src,SRF</b>     |
| ERK5 Signaling                                    | 0.05Gy 2h              | 0.63                 | 0.04                 | NaN                   | MYC                                                                                                                                                                  |
| ERK5 Signaling                                    | 0.05Gy 4h              | 0.00                 | 0.04                 | NaN                   | FOS                                                                                                                                                                  |
| ERK5 Signaling                                    | 2Gy 2h                 | 1.06                 | 0.25                 | -1.13                 | ATF4,MAP2K5,MAPK7,MEF2D,MYC,RRAS2,SGK1                                                                                                                               |
| <b>ERK5 Signaling</b>                             | <b>2Gy 4h</b>          | <b>1.54</b>          | <b>0.43</b>          | <b>0.58</b>           | <b>AKT1,ATF2,ATF4,EGFR,FOS,FOXO3,HRAS,IL6ST,KRAS,LIF,RRAS2,Src</b>                                                                                                   |
| Erythropoietin Signaling                          | 0.05Gy 2h              | 0.48                 | 0.02                 | NaN                   | SOCS3                                                                                                                                                                |
| Erythropoietin Signaling                          | 0.05Gy 4h              | 1.01                 | 0.10                 | NaN                   | FOS,JAK2,PRKCD,PRKCI                                                                                                                                                 |
| Erythropoietin Signaling                          | 2Gy 2h                 | 0.90                 | 0.21                 | NaN                   | ELK1,PDPK1,PIK3CB,PIK3CD,PRKCE,RRAS2,SOCS1,SOCS3,SOS1                                                                                                                |
| <b>Erythropoietin Signaling</b>                   | <b>2Gy 4h</b>          | <b>2.08</b>          | <b>0.43</b>          | <b>NaN</b>            | <b>AKT1,ELK1,FOS,HRAS,JAK2,KRAS,MAP2K1,NFKB1,NFKBIA,PIK3CB,PIK3CD,PRKCD,PRKCE,PRKCI,PRKD3,RRAS2,SOCS3,Src</b>                                                        |
| Estrogen Biosynthesis                             | 2Gy 4h                 | 0.00                 | 0.10                 | NaN                   | CYP1B1,HSD17B10                                                                                                                                                      |
| Estrogen Receptor Signaling                       | 0.05Gy 4h              | 0.36                 | 0.06                 | NaN                   | NR3C1,SMARCA4                                                                                                                                                        |
| Estrogen Receptor Signaling                       | 2Gy 2h                 | 0.43                 | 0.17                 | NaN                   | CCNC,NCOR2,PPARGC1A,RRAS2,RUNX2,SOS1                                                                                                                                 |
| Estrogen Receptor Signaling                       | 2Gy 4h                 | 0.43                 | 0.29                 | NaN                   | CCNH,HRAS,KRAS,MAP2K1,NCOA2,NR3C1,RRAS2,SMARCA4,Src,THRAP3                                                                                                           |
| Estrogen-Dependent Breast Cancer Signaling        | 0.05Gy 4h              | 0.00                 | 0.03                 | NaN                   | FOS                                                                                                                                                                  |
| Estrogen-Dependent Breast Cancer Signaling        | 2Gy 2h                 | 0.25                 | 0.14                 | -0.45                 | ATF4,ELK1,PIK3CB,PIK3CD,RRAS2                                                                                                                                        |
| <b>Estrogen-Dependent Breast Cancer Signaling</b> | <b>2Gy 4h</b>          | <b>1.81</b>          | <b>0.43</b>          | <b>-0.54</b>          | <b>AKT1,ATF2,ATF4,EGFR,ELK1,FOS,HRAS,HSD17B10,KRAS,NFKB1,PIK3CB,PIK3CD,RRAS2,SP1,Src</b>                                                                             |
| <b>Estrogen-mediated S-phase Entry</b>            | <b>0.05Gy 2h</b>       | <b>1.93</b>          | <b>0.11</b>          | <b>NaN</b>            | <b>CDKN1B,MYC</b>                                                                                                                                                    |
| <b>Estrogen-mediated S-phase Entry</b>            | <b>0.05Gy 4h</b>       | <b>1.42</b>          | <b>0.17</b>          | <b>NaN</b>            | <b>CDKN1A,E2F4,E2F5</b>                                                                                                                                              |
| Estrogen-mediated S-phase Entry                   | 2Gy 2h                 | 0.62                 | 0.22                 | -1.00                 | CCNE1,CDKN1A,CDKN1B,MYC                                                                                                                                              |
| <a href="#">Estrogen-mediated S-phase Entry</a>   | <a href="#">2Gy 4h</a> | <a href="#">0.55</a> | <a href="#">0.33</a> | <a href="#">-2.45</a> | <a href="#">CCNA2,CCNE1,CCNE2,CDKN1A,E2F1,E2F5</a>                                                                                                                   |
| Extrinsic Prothrombin Activation Pathway          | 2Gy 2h                 | 0.00                 | 0.09                 | NaN                   | F3                                                                                                                                                                   |
| Extrinsic Prothrombin Activation Pathway          | 2Gy 4h                 | 0.00                 | 0.09                 | NaN                   | THBD                                                                                                                                                                 |
| Factors Promoting Cardiogenesis in Vertebrates    | 0.05Gy 4h              | 0.63                 | 0.07                 | NaN                   | PRKCD,PRKCI,TGFB1,TGFBR1                                                                                                                                             |

| Ingenuity Canonical Pathways                                            | Model            | <b>-log(p-value)</b> | Ratio       | z-score      | Molecules                                                                                                                                                                      |
|-------------------------------------------------------------------------|------------------|----------------------|-------------|--------------|--------------------------------------------------------------------------------------------------------------------------------------------------------------------------------|
| Factors Promoting Cardiogenesis in Vertebrates                          | 2Gy 2h           | 0.00                 | 0.08        | NaN          | ACVR2A,CCNE1,CDC6,PRKCE,TBX5                                                                                                                                                   |
| <b>Factors Promoting Cardiogenesis in Vertebrates</b>                   | <b>2Gy 4h</b>    | <b>4.34</b>          | <b>0.49</b> | <b>NaN</b>   | <b>ACVR1,ACVR1B,ACVR2A,ATF2,AXIN1,BMP1,BMP2,BMP4,BMPR2,CCNE1,CCNE2,CDC6,CTNNB1,DKK1,FZD1,GSK3B,LEF1,MAP3K7,NOX4,PRKCD,PRKCE,PRKCI,PRKD3,SMAD2,SMAD4,TCF4,TCF7,TGFB1,TGFBR1</b> |
| FAK Signaling                                                           | 0.05Gy 4h        | 0.00                 | 0.02        | NaN          | ACTA2                                                                                                                                                                          |
| FAK Signaling                                                           | 2Gy 2h           | 0.60                 | 0.19        | NaN          | ACTA2,ITGA5,PDPK1,PIK3CB,PIK3CD,RAC1,RRAS2,SOS1                                                                                                                                |
| FAK Signaling                                                           | 2Gy 4h           | 0.58                 | 0.30        | NaN          | ACTA2,AKT1,BCAR1,CRK,EGFR,HRAS,KRAS,MAP2K1,PIK3CB,PIK3CD,PTEN,RRAS2,SRC                                                                                                        |
| FAT10 Cancer Signaling Pathway                                          | 0.05Gy 2h        | 0.54                 | 0.03        | NaN          | IL6                                                                                                                                                                            |
| FAT10 Cancer Signaling Pathway                                          | 0.05Gy 4h        | 0.34                 | 0.06        | NaN          | TGFB1,TGFBR1                                                                                                                                                                   |
| FAT10 Cancer Signaling Pathway                                          | 2Gy 2h           | 0.63                 | 0.19        | -1.89        | ACVR2A,IKBKB,IKBKE,IL6,PCNA,SMAD3,TNFRSF1B                                                                                                                                     |
| <b>FAT10 Cancer Signaling Pathway</b>                                   | <b>2Gy 4h</b>    | <b>3.52</b>          | <b>0.53</b> | <b>-2.07</b> | <b>ACVR1,ACVR1B,ACVR2A,AKT1,BMPR2,CTNNB1,GSK3B,NFKB1,NFKBIA,NGFR,PCNA,SMAD2,SMAD3,SMAD4,TCF4,TGFB1,TGFBR1,TNFRSF11B,TNFRSF1B</b>                                               |
| FAT10 Signaling Pathway                                                 | 2Gy 2h           | 0.58                 | 0.50        | NaN          | MAP1LC3B                                                                                                                                                                       |
| FAT10 Signaling Pathway                                                 | 2Gy 4h           | 0.36                 | 0.50        | NaN          | MAP1LC3B                                                                                                                                                                       |
| Fatty Acid 1±-oxidation                                                 | 0.05Gy 2h        | 1.19                 | 0.14        | NaN          | PTGS2                                                                                                                                                                          |
| Fatty Acid 1±-oxidation                                                 | 2Gy 2h           | 0.18                 | 0.14        | NaN          | PTGS2                                                                                                                                                                          |
| Fatty Acid 1±-oxidation                                                 | 2Gy 4h           | 0.00                 | 0.14        | NaN          | PTGS2                                                                                                                                                                          |
| Fatty Acid 12-oxidation I                                               | 2Gy 2h           | 0.00                 | 0.13        | NaN          | SCP2                                                                                                                                                                           |
| Fatty Acid 12-oxidation I                                               | 2Gy 4h           | 0.00                 | 0.13        | NaN          | HSD17B10                                                                                                                                                                       |
| Fc Epsilon RI Signaling                                                 | 0.05Gy 4h        | 0.51                 | 0.07        | NaN          | PRKCD,PRKCI,VAV2                                                                                                                                                               |
| Fc Epsilon RI Signaling                                                 | 2Gy 2h           | 0.50                 | 0.17        | -0.71        | MAPK8,PDPK1,PIK3CB,PIK3CD,PRKCE,RAC1,RRAS2,SOS1                                                                                                                                |
| Fc Epsilon RI Signaling                                                 | 2Gy 4h           | 0.61                 | 0.30        | 0.54         | AKT1,HRAS,KRAS,MAP2K1,MAPK8,PIK3CB,PIK3CD,PRKCD,PRKCE,PRKCI,PRKD3,RAC3,RRAS2,VAV2                                                                                              |
| <b>Fc13 Receptor-mediated Phagocytosis in Macrophages and Monocytes</b> | <b>0.05Gy 4h</b> | <b>2.02</b>          | <b>0.14</b> | <b>0.00</b>  | <b>ACTA2,ARF6,PRKCD,PRKCI,VAV2,YES1</b>                                                                                                                                        |
| Fc13 Receptor-mediated Phagocytosis in Macrophages and Monocytes        | 2Gy 2h           | 0.81                 | 0.21        | -0.33        | ACTA2,ARF6,CDC42,HMOX1,NAPEPLD,NCK1,PLD1,PRKCE,RAC1                                                                                                                            |
| <b>Fc13 Receptor-mediated Phagocytosis in Macrophages and Monocytes</b> | <b>2Gy 4h</b>    | <b>1.51</b>          | <b>0.39</b> | <b>0.24</b>  | <b>ACTA2,AKT1,ARF6,CRK,EZR,HMOX1,PLD1,PRKCD,PRKCE,PRKCI,PRKD3,PTEN,PTK2B,RAC3,SR C,VAV2,YES1</b>                                                                               |
| <b>Fc13RIIB Signaling in B Lymphocytes</b>                              | <b>2Gy 2h</b>    | <b>2.12</b>          | <b>0.36</b> | <b>-1.13</b> | <b>CACNA1A,DOK1,MAPK8,PDPK1,PIK3CB,PIK3CD,RRAS2,SOS1</b>                                                                                                                       |
| Fc13RIIB Signaling in B Lymphocytes                                     | 2Gy 4h           | 0.79                 | 0.36        | -0.38        | AKT1,CACNA1C,HRAS,KRAS,MAPK8,PIK3CB,PIK3CD,RRAS2                                                                                                                               |
| FGF Signaling                                                           | 0.05Gy 4h        | 0.00                 | 0.03        | NaN          | FGF5                                                                                                                                                                           |
| FGF Signaling                                                           | 2Gy 2h           | 1.06                 | 0.23        | -1.00        | ATF4,FGF2,FGF7,FGF9,MAPK8,PIK3CB,PIK3CD,RAC1,SOS1                                                                                                                              |
| FGF Signaling                                                           | 2Gy 4h           | 0.60                 | 0.31        | 0.00         | AKT1,ATF2,ATF4,CRK,FGF2,FGF5,HRAS,MAP2K1,MAP3K1,MAPK8,PIK3CB,PIK3CD                                                                                                            |
| <b>FLT3 Signaling in Hematopoietic Progenitor Cells</b>                 | <b>2Gy 2h</b>    | <b>1.30</b>          | <b>0.27</b> | <b>-1.41</b> | <b>ATF4,ELK1,MTOR,PDPK1,PIK3CB,PIK3CD,RRAS2,SOS1</b>                                                                                                                           |
| FLT3 Signaling in Hematopoietic Progenitor Cells                        | 2Gy 4h           | 0.71                 | 0.33        | 0.00         | AKT1,ATF2,ATF4,ELK1,HRAS,KRAS,MAP2K1,PIK3CB,PIK3CD,RRAS2                                                                                                                       |
| fMLP Signaling in Neutrophils                                           | 0.05Gy 4h        | 0.95                 | 0.08        | 1.34         | GNAI2,GNG5,NFATC1,PRKCD,PRKCI                                                                                                                                                  |
| fMLP Signaling in Neutrophils                                           | 2Gy 2h           | 0.64                 | 0.18        | -0.30        | CDC42,ELK1,NFATC1,NFATC4,PIK3CB,PIK3CD,PPP3CC,PPP3R1,PRKCE,RAC1,RRAS2                                                                                                          |
| <b>fMLP Signaling in Neutrophils</b>                                    | <b>2Gy 4h</b>    | <b>2.05</b>          | <b>0.39</b> | <b>-1.63</b> | <b>ELK1,GNAI2,GNAI3,GNG5,HRAS,ITPR2,KRAS,MAP2K1,NFAT5,NFATC1,NFKB1,NFKBIA,NOX4,PIK 3CB,PIK3CD,PPP3CA,PPP3CB,PPP3CC,PPP3R1,PRKCD,PRKCE,PRKCI,PRKD3,RRAS2</b>                    |
| Folate Transformations I                                                | 0.05Gy 4h        | 0.92                 | 0.33        | NaN          | MTHFD2                                                                                                                                                                         |
| Folate Transformations I                                                | 2Gy 2h           | 0.44                 | 0.33        | NaN          | MTHFD2                                                                                                                                                                         |
| FXR/RXR Activation                                                      | 2Gy 2h           | 0.00                 | 0.06        | NaN          | APOE,MAPK8,PPARGC1A,RXRA,SLC4A2                                                                                                                                                |
| FXR/RXR Activation                                                      | 2Gy 4h           | 0.00                 | 0.09        | NaN          | AKT1,MAPK8,NR1H3,PPARA,RARA,SDC1,VLDLR                                                                                                                                         |
| G Beta Gamma Signaling                                                  | 0.05Gy 4h        | 0.85                 | 0.08        | 1.00         | GNAI2,GNG5,PRKCD,PRKCI                                                                                                                                                         |

| Ingenuity Canonical Pathways                     | Model            | -log(p-value) | Ratio       | z-score      | Molecules                                                                                                                                                                                        |
|--------------------------------------------------|------------------|---------------|-------------|--------------|--------------------------------------------------------------------------------------------------------------------------------------------------------------------------------------------------|
| G Beta Gamma Signaling                           | 2Gy 2h           | 0.44          | 0.17        | -0.71        | CACNA1A,CAV2,CDC42,GNAO1,PDPK1,PRKCE,RRAS2,SOS1                                                                                                                                                  |
| G Beta Gamma Signaling                           | 2Gy 4h           | 0.70          | 0.31        | -0.26        | AKT1,CACNA1C,EGFR,GNAI2,GNAI3,GNG5,HRAS,KRAS,PRKAR2A,PRKCD,PRKCE,PRKCI,PRKD3,RRAS2, SRC                                                                                                          |
| G Protein Signaling Mediated by Tubby            | 0.05Gy 4h        | 0.94          | 0.14        | NaN          | GNG5,JAK2                                                                                                                                                                                        |
| G Protein Signaling Mediated by Tubby            | 2Gy 4h           | 0.00          | 0.21        | NaN          | ABL1,GNG5,JAK2                                                                                                                                                                                   |
| GABA Receptor Signaling                          | 2Gy 2h           | 0.00          | 0.04        | NaN          | CACNA1A                                                                                                                                                                                          |
| GABA Receptor Signaling                          | 2Gy 4h           | 0.00          | 0.17        | NaN          | ADCY8,CACNA1C,GABRB2,UBC                                                                                                                                                                         |
| GADD45 Signaling                                 | 0.05Gy 4h        | 0.32          | 0.07        | NaN          | CDKN1A                                                                                                                                                                                           |
| GADD45 Signaling                                 | 2Gy 2h           | 0.45          | 0.20        | NaN          | CCNE1,CDKN1A,PCNA                                                                                                                                                                                |
| GADD45 Signaling                                 | 2Gy 4h           | 1.25          | 0.47        | NaN          | ATM,CCNB1,CCNE1,CCNE2,CDKN1A,GADD45A,PCNA                                                                                                                                                        |
| <b>Galactose Degradation I (Leloir Pathway)</b>  | <b>0.05Gy 4h</b> | <b>1.37</b>   | <b>1.00</b> | <b>NaN</b>   | <b>GALK1</b>                                                                                                                                                                                     |
| Galactose Degradation I (Leloir Pathway)         | 2Gy 4h           | 0.60          | 1.00        | NaN          | GALK1                                                                                                                                                                                            |
| Gap Junction Signaling                           | 0.05Gy 4h        | 0.44          | 0.05        | NaN          | ACTA2,GJC1,GNAI2,PRKCD,PRKCI                                                                                                                                                                     |
| Gap Junction Signaling                           | 2Gy 2h           | 0.00          | 0.13        | NaN          | ACTA2,MAP2K5,MAPK7,PIK3CB,PIK3CD,PPP3CC,PPP3R1,PRKCE,RRAS2,SOS1,TUBB2A,TUBB4B                                                                                                                    |
| <b>Gap Junction Signaling</b>                    | <b>2Gy 4h</b>    | <b>1.31</b>   | <b>0.33</b> | <b>NaN</b>   | <b>ACTA2,ADCY8,AKT1,CTNNB1,EGFR,GJA1,GJC1,GNAI2,GNAI3,HRAS,ITPR2,KRAS,LPAR1,MAP2K1,NPR3,PIK3CB,PIK3CD,PPP3CA,PPP3CB,PPP3CC,PPP3R1,PRKAR2A,PRKCD,PRKCE,PRKCI,PRKD3,RRAS2,SP1, SRC,TJP1,TUBB2A</b> |
| GDNF Family Ligand-Receptor Interactions         | 0.05Gy 4h        | 0.00          | 0.03        | NaN          | FOS                                                                                                                                                                                              |
| <b>GDNF Family Ligand-Receptor Interactions</b>  | <b>2Gy 2h</b>    | <b>1.99</b>   | <b>0.30</b> | <b>-0.30</b> | <b>CDC42,DOK1,IRS1,IRS2,MAPK8,NCK1,PIK3CB,PIK3CD,RAC1,RRAS2,SOS1</b>                                                                                                                             |
| GDNF Family Ligand-Receptor Interactions         | 2Gy 4h           | 0.35          | 0.27        | 0.33         | FOS,GDNF,HRAS,ITPR2,KRAS,MAP2K1,MAPK8,PIK3CB,PIK3CD,RRAS2                                                                                                                                        |
| <b>GDP-mannose Biosynthesis</b>                  | <b>0.05Gy 4h</b> | <b>1.37</b>   | <b>1.00</b> | <b>NaN</b>   | <b>GPI</b>                                                                                                                                                                                       |
| GDP-mannose Biosynthesis                         | 2Gy 4h           | 0.60          | 1.00        | NaN          | GPI                                                                                                                                                                                              |
| Germ Cell-Sertoli Cell Junction Signaling        | 0.05Gy 4h        | 1.19          | 0.09        | NaN          | ACTA2,RAB8B,RHOA,RHOG,TGFB1,TGFBR1                                                                                                                                                               |
| Germ Cell-Sertoli Cell Junction Signaling        | 2Gy 2h           | 1.06          | 0.21        | NaN          | ACTA2,CDC42,LIMK2,MAPK8,PDPK1,PIK3CB,PIK3CD,RAC1,RHOB,RHOQ,RND3,RRAS2,TUBB2A,TUBB4B                                                                                                              |
| <b>Germ Cell-Sertoli Cell Junction Signaling</b> | <b>2Gy 4h</b>    | <b>1.99</b>   | <b>0.38</b> | <b>NaN</b>   | <b>ACTA2,AKT1,AXIN1,BCAR1,CFL1,CTNNB1,HRAS,KRAS,LIMK2,MAP2K1,MAP3K1,MAP3K7,MAPK8,NECTIN2,PIK3CB,PIK3CD,RAB8B,RAC3,RHOA,RRAS2,SORBS1, SRC,TGFB1,TGFBR1,TJP1,TUBB2A</b>                            |
| G $\beta$ 12/13 Signaling                        | 0.05Gy 4h        | 0.00          | 0.04        | NaN          | RHOA,VAV2                                                                                                                                                                                        |
| G $\beta$ 12/13 Signaling                        | 2Gy 2h           | 0.81          | 0.20        | -0.30        | CDC42,ELK1,IKBKB,IKBKE,LPAR6,MAPK7,MAPK8,MEF2D,PIK3CB,PIK3CD,RRAS2                                                                                                                               |
| <b>G<math>\beta</math>12/13 Signaling</b>        | <b>2Gy 4h</b>    | <b>1.32</b>   | <b>0.36</b> | <b>-1.15</b> | <b>AKT1,CTNNB1,ELK1,HRAS,KRAS,LPAR1,MAP2K1,MAP3K1,MAPK8,NFKB1,NFKBIA,PIK3CB,PIK3CD,PTK2B,RHOA,ROCK1,ROCK2,RRAS2, SRC,VAV2</b>                                                                    |
| G $\beta$ i Signaling                            | 0.05Gy 4h        | 0.00          | 0.04        | NaN          | GNAI2,GNG5                                                                                                                                                                                       |
| G $\beta$ i Signaling                            | 2Gy 2h           | 0.00          | 0.09        | 1.34         | RGS12,RGS4,RRAS2,S1PR3,SOS1                                                                                                                                                                      |
| G $\beta$ i Signaling                            | 2Gy 4h           | 0.00          | 0.23        | -0.28        | ADCY8,GNAI2,GNAI3,GNG5,HRAS,KRAS,LPAR1,NPR3,PRKAR2A,PTGER3,RGS4,RRAS2, SRC                                                                                                                       |
| <b>G<math>\beta</math>q Signaling</b>            | <b>0.05Gy 4h</b> | <b>1.33</b>   | <b>0.09</b> | <b>1.13</b>  | <b>GNG5,HRH1,NFATC1,PRKCD,PRKCI,RHOA,RHOG</b>                                                                                                                                                    |
| <b>G<math>\beta</math>q Signaling</b>            | <b>2Gy 2h</b>    | <b>2.29</b>   | <b>0.25</b> | <b>-1.89</b> | <b>CDC42,CHRM3,ELK1,HMOX1,IKBKB,IKBKE,NAPEPLD,NFATC1,NFATC4,PIK3CB,PIK3CD,PLD1,PPP3CC,PPP3R1,PRKCE,RAC1,RGS4,RHOB,RHOQ,RND3</b>                                                                  |
| <b>G<math>\beta</math>q Signaling</b>            | <b>2Gy 4h</b>    | <b>1.62</b>   | <b>0.35</b> | <b>-1.57</b> | <b>AKT1,ELK1,GNG5,GSK3B,HMOX1,HRH1,ITPR2,MAP2K1,NFATC1,NFKB1,NFKBIA,PIK3CB,PIK3CD,PLD1,PPP3CA,PPP3CB,PPP3CC,PPP3R1,PRKCD,PRKCE,PRKCI,PRKD3,PTK2B,RAC3,RGS4,RHOA,ROCK1,ROCK2</b>                  |
| G $\beta$ s Signaling                            | 0.05Gy 4h        | 0.00          | 0.02        | NaN          | GNG5                                                                                                                                                                                             |
| G $\beta$ s Signaling                            | 2Gy 2h           | 0.00          | 0.07        | -1.00        | ATF4,CHRM3,ELK1,PTGER4                                                                                                                                                                           |
| G $\beta$ s Signaling                            | 2Gy 4h           | 0.00          | 0.20        | 0.91         | ADCY8,ADORA2B,ADRB2,ATF2,ATF4,ELK1,GNG5,MAP2K1,PRKAR2A,PTGER2, SRC                                                                                                                               |

| Ingenuity Canonical Pathways             | Model         | -log(p-value) | Ratio       | z-score      | Molecules                                                                                                                                                                                                                                                                                       |
|------------------------------------------|---------------|---------------|-------------|--------------|-------------------------------------------------------------------------------------------------------------------------------------------------------------------------------------------------------------------------------------------------------------------------------------------------|
| Glioblastoma Multiforme Signaling        | 0.05Gy 2h     | 0.74          | 0.02        | NaN          | CDKN1B,MYC                                                                                                                                                                                                                                                                                      |
| Glioblastoma Multiforme Signaling        | 0.05Gy 4h     | 1.23          | 0.08        | 1.34         | CDKN1A,E2F4,E2F5,MDM2,PRKCD,RHOA,RHOG                                                                                                                                                                                                                                                           |
| Glioblastoma Multiforme Signaling        | 2Gy 2h        | 0.95          | 0.19        | -0.78        | CCNE1,CDC42,CDKN1A,CDKN1B,MDM2,MTOR,MYC,PDGFA,PIK3CB,PIK3CD,RAC1,RHOB,RHOQ,RND3,RRAS2,SOS1                                                                                                                                                                                                      |
| Glioblastoma Multiforme Signaling        | 2Gy 4h        | 1.13          | 0.33        | -0.22        | AKT1,AXIN1,CCNE1,CDKN1A,CDKN2A,CTNNB1,E2F1,E2F5,EGFR,FZD1,GSK3B,HRAS,ITPR2,KRAS,LEF1,MAP2K1,MDM2,PDGFRA,PIK3CB,PIK3CD,PRKCD,PTEN,RAC3,RHOA,RRAS2,SRC,WNT5A                                                                                                                                      |
| Glioma Invasiveness Signaling            | 0.05Gy 4h     | 0.37          | 0.06        | NaN          | RHOA,RHOG                                                                                                                                                                                                                                                                                       |
| <b>Glioma Invasiveness Signaling</b>     | <b>2Gy 2h</b> | <b>1.39</b>   | <b>0.27</b> | <b>-0.38</b> | <b>CDC42,PIK3CB,PIK3CD,PLAUR,RAC1,RHOB,RHOQ,RND3,RRAS2</b>                                                                                                                                                                                                                                      |
| Glioma Invasiveness Signaling            | 2Gy 4h        | 0.00          | 0.24        | -0.38        | CD44,HRAS,KRAS,PIK3CB,PIK3CD,RAC3,RHOA,RRAS2                                                                                                                                                                                                                                                    |
| Glioma Signaling                         | 0.05Gy 4h     | 1.21          | 0.09        | NaN          | CDKN1A,E2F4,E2F5,MDM2,PRKCD,PRKCI                                                                                                                                                                                                                                                               |
| Glioma Signaling                         | 2Gy 2h        | 0.32          | 0.15        | -1.41        | CAMK2G,CDKN1A,MDM2,MTOR,PDGFA,PIK3CB,PIK3CD,PRKCE,RRAS2,SOS1                                                                                                                                                                                                                                    |
| <b>Glioma Signaling</b>                  | <b>2Gy 4h</b> | <b>1.79</b>   | <b>0.37</b> | <b>-0.26</b> | <b>ABL1,AKT1,CAMK1,CDKN1A,CDKN2A,CDKN2B,CDKN2D,E2F1,E2F5,EGFR,HRAS,KRAS,MAP2K1,MDM2,PA2G4,PDGFRA,PIK3CB,PIK3CD,PRKCD,PRKCE,PRKCI,PRKD3,PTEN,RBL2,RRAS2</b>                                                                                                                                      |
| Glucocorticoid Receptor Signaling        | 0.05Gy 2h     | 0.42          | 0.01        | NaN          | IL6,PTGS2                                                                                                                                                                                                                                                                                       |
| Glucocorticoid Receptor Signaling        | 0.05Gy 4h     | 1.16          | 0.07        | NaN          | BCL2,CDKN1A,FOS,JAK2,NFATC1,NR3C1,SMARCA4,TGFB1,TGFBR1,UBE2I                                                                                                                                                                                                                                    |
| <b>Glucocorticoid Receptor Signaling</b> | <b>2Gy 2h</b> | <b>1.52</b>   | <b>0.20</b> | <b>NaN</b>   | <b>ATC1,NFATC4,NR3C2,PIK3CB,PIK3CD,PPP3CC,PPP3R1,PTGES3,PTGS2,RAC1,RRAS2,SERPINE1,SGK1,SMAD3,SOS1</b>                                                                                                                                                                                           |
| <b>Glucocorticoid Receptor Signaling</b> | <b>2Gy 4h</b> | <b>1.50</b>   | <b>0.32</b> | <b>NaN</b>   | <b>ADRB2,AKT1,BCL2,BCL2L1,CCNH,CDKN1A,DUSP1,ELK1,FOS,FOXO3,HRAS,HSP90AB1,HSPA6,HSPA8,ICAM1,JAK2,KRAS,KRT17,KRT18,MAP2K1,MAP3K1,MAP3K7,MAPK8,NCOA2,NFAT5,NFATC1,NFKB1,NFKBIA,NR3C1,PIK3CB,PIK3CD,PPP3CA,PPP3CB,PPP3CC,PPP3R1,PTGES3,PTGS2,RRAS2,SMAD2,SMAD3,SMAD4,SMARCA4,TGFB1,TGFBR1,UBE2I</b> |
| Gluconeogenesis I                        | 0.05Gy 4h     | 0.80          | 0.25        | NaN          | GPI                                                                                                                                                                                                                                                                                             |
| <b>Gluconeogenesis I</b>                 | <b>2Gy 4h</b> | <b>2.41</b>   | <b>1.00</b> | <b>2.00</b>  | <b>ENO1,GAPDH,GPI,PGK1</b>                                                                                                                                                                                                                                                                      |
| Glutamate Biosynthesis II                | 2Gy 4h        | 0.60          | 1.00        | NaN          | GLUD1                                                                                                                                                                                                                                                                                           |
| Glutamate Degradation X                  | 2Gy 4h        | 0.60          | 1.00        | NaN          | GLUD1                                                                                                                                                                                                                                                                                           |
| Glutamate Receptor Signaling             | 0.05Gy 4h     | 1.12          | 0.18        | NaN          | GNG5,SLC38A1                                                                                                                                                                                                                                                                                    |
| Glutamate Receptor Signaling             | 2Gy 4h        | 0.26          | 0.27        | NaN          | GLUL,GNG5,SLC38A1                                                                                                                                                                                                                                                                               |
| Glutamine Biosynthesis I                 | 2Gy 4h        | 0.60          | 1.00        | NaN          | GLUL                                                                                                                                                                                                                                                                                            |
| Glutaryl-CoA Degradation                 | 2Gy 4h        | 0.24          | 0.33        | NaN          | HSD17B10                                                                                                                                                                                                                                                                                        |
| Glutathione Biosynthesis                 | 2Gy 4h        | 0.60          | 1.00        | NaN          | GCLC                                                                                                                                                                                                                                                                                            |
| Glutathione Redox Reactions I            | 2Gy 4h        | 0.49          | 0.38        | NaN          | GPX1,GSTP1,PRDX6                                                                                                                                                                                                                                                                                |
| Glutathione Redox Reactions II           | 2Gy 4h        | 0.60          | 1.00        | NaN          | GLRX                                                                                                                                                                                                                                                                                            |
| Glutathione-mediated Detoxification      | 2Gy 4h        | 0.00          | 0.20        | NaN          | GSTP1                                                                                                                                                                                                                                                                                           |
| Glycine Cleavage Complex                 | 2Gy 4h        | 0.36          | 0.50        | NaN          | DLD                                                                                                                                                                                                                                                                                             |
| Glycogen Degradation II                  | 2Gy 2h        | 0.85          | 1.00        | NaN          | MTAP                                                                                                                                                                                                                                                                                            |
| Glycogen Degradation III                 | 2Gy 2h        | 0.44          | 0.33        | NaN          | MTAP                                                                                                                                                                                                                                                                                            |
| Glycogen Degradation III                 | 2Gy 4h        | 0.24          | 0.33        | NaN          | GAA                                                                                                                                                                                                                                                                                             |
| Glycolysis I                             | 0.05Gy 4h     | 0.71          | 0.20        | NaN          | GPI                                                                                                                                                                                                                                                                                             |
| <b>Glycolysis I</b>                      | <b>2Gy 4h</b> | <b>3.01</b>   | <b>1.00</b> | <b>2.24</b>  | <b>ENO1,GAPDH,GPI,PGK1,PKM</b>                                                                                                                                                                                                                                                                  |
| GM-CSF Signaling                         | 0.05Gy 4h     | 0.00          | 0.03        | NaN          | JAK2                                                                                                                                                                                                                                                                                            |
| <b>GM-CSF Signaling</b>                  | <b>2Gy 2h</b> | <b>1.90</b>   | <b>0.29</b> | <b>-0.33</b> | <b>BCL2L1,CAMK2G,CISH,ELK1,PIK3CB,PIK3CD,PPP3CC,PPP3R1,RRAS2,RUNX1,SOS1</b>                                                                                                                                                                                                                     |
| <b>GM-CSF Signaling</b>                  | <b>2Gy 4h</b> | <b>1.82</b>   | <b>0.42</b> | <b>0.00</b>  | <b>AKT1,BCL2L1,ELK1,ETS1,HRAS,JAK2,KRAS,MAP2K1,PIK3CB,PIK3CD,PPP3CA,PPP3CB,PPP3CC,PPP3R1,RRAS2,RUNX1</b>                                                                                                                                                                                        |



| Ingenuity Canonical Pathways                                                    | Model            | -log(p-value) | Ratio       | z-score      | Molecules                                                                                                                                                                      |
|---------------------------------------------------------------------------------|------------------|---------------|-------------|--------------|--------------------------------------------------------------------------------------------------------------------------------------------------------------------------------|
| GNRH Signaling                                                                  | 0.05Gy 2h        | 0.29          | 0.01        | NaN          | EGR1                                                                                                                                                                           |
| GNRH Signaling                                                                  | 0.05Gy 4h        | 1.00          | 0.08        | 1.63         | EGR1,FOS,GNAI2,GNG5,PRKCD,PRKCI                                                                                                                                                |
| GNRH Signaling                                                                  | 2Gy 2h           | 0.42          | 0.16        | 0.30         | ATF4,CACNA1A,CAMK2G,CDC42,EGR1,ELK1,MAPK7,MAPK8,PRKCE,RAC1,RRAS2,SOS1                                                                                                          |
| <b>GNRH Signaling</b>                                                           | <b>2Gy 4h</b>    | <b>1.60</b>   | <b>0.36</b> | <b>-0.39</b> | <b>P2K1,MAP3K1,MAP3K7,MAPK8,NFKB1,PRKAR2A,PRKCD,PRKCE,PRKCI,PRKD3,PTK2B,RRAS2, SRC</b>                                                                                         |
| GP6 Signaling Pathway                                                           | 0.05Gy 4h        | 0.41          | 0.06        | NaN          | PRKCD,PRKCI,RHOG                                                                                                                                                               |
| GP6 Signaling Pathway                                                           | 2Gy 2h           | 0.00          | 0.09        | -1.34        | PDPK1,PIK3CB,PIK3CD,PRKCE,RAC1                                                                                                                                                 |
| GP6 Signaling Pathway                                                           | 2Gy 4h           | 0.00          | 0.19        | 1.27         | AKT1,COL6A2,GSK3B,LAMC2,PIK3CB,PIK3CD,PRKCD,PRKCE,PRKCI,PRKD3                                                                                                                  |
| GPCR-Mediated Integration of Enteroendocrine Signaling Exemplified by an L Cell | 0.05Gy 4h        | 0.00          | 0.03        | NaN          | GNAI2                                                                                                                                                                          |
| GPCR-Mediated Integration of Enteroendocrine Signaling Exemplified by an L Cell | 2Gy 4h           | 0.00          | 0.16        | 0.00         | ADCY8,ADRB2,GNAI2,GNAI3,ITPR2,PRKAR2A                                                                                                                                          |
| GPCR-Mediated Nutrient Sensing in Enteroendocrine Cells                         | 0.05Gy 4h        | 0.90          | 0.09        | 0.00         | GNAI2,GNG5,PRKCD,PRKCI                                                                                                                                                         |
| GPCR-Mediated Nutrient Sensing in Enteroendocrine Cells                         | 2Gy 2h           | 0.00          | 0.04        | NaN          | CACNA1A,PRKCE                                                                                                                                                                  |
| GPCR-Mediated Nutrient Sensing in Enteroendocrine Cells                         | 2Gy 4h           | 0.00          | 0.24        | -0.30        | ADCY8,CACNA1C,GNAI2,GNAI3,GNG5,ITPR2,PRKAR2A,PRKCD,PRKCE,PRKCI,PRKD3                                                                                                           |
| G-Protein Coupled Receptor Signaling                                            | 0.05Gy 4h        | 0.00          | 0.01        | NaN          | GNAI2,HRH1                                                                                                                                                                     |
| G-Protein Coupled Receptor Signaling                                            | 2Gy 2h           | 0.36          | 0.15        | NaN          | ATF4,CAMK2G,CHRM3,DUSP1,DUSP6,GNAO1,IKBKB,IKBKE,NAPEPLD,PDE4D,PDPK1,PIK3CB,PIK3CD,PRKCE,PTGER4,RGS12,RGS4,RRAS2,S1PR3,SOS1                                                     |
| G-Protein Coupled Receptor Signaling                                            | 2Gy 4h           | 0.00          | 0.22        | NaN          | ADCY8,ADORA2B,ADRB2,AKT1,APEX1,ATF2,ATF4,DUSP1,DUSP6,GNAI2,GNAI3,HRAS,HRH1,KRAS,LPAR1,MAP2K1,NFKB1,NFKBIA,NPR3,PIK3CB,PIK3CD,PRKAR2A,PRKCE,PTGER2,PTGER3,PTK2B,RGS4,RRAS2, SRC |
| Graft-versus-Host Disease Signaling                                             | 0.05Gy 2h        | 0.75          | 0.05        | NaN          | IL6                                                                                                                                                                            |
| Graft-versus-Host Disease Signaling                                             | 2Gy 2h           | 0.00          | 0.10        | NaN          | FAS,IL6                                                                                                                                                                        |
| Graft-versus-Host Disease Signaling                                             | 2Gy 4h           | 0.00          | 0.10        | NaN          | FAS,HLA-E                                                                                                                                                                      |
| Granulocyte Adhesion and Diapedesis                                             | 0.05Gy 4h        | 0.00          | 0.02        | NaN          | GNAI2,HRH1                                                                                                                                                                     |
| Granulocyte Adhesion and Diapedesis                                             | 2Gy 2h           | 0.00          | 0.10        | NaN          | CCL2,CCL7,CXCL1,CXCL2,CXCL8,ITGA5,MMP15,SDC4,TNFRSF1B                                                                                                                          |
| Granulocyte Adhesion and Diapedesis                                             | 2Gy 4h           | 0.00          | 0.14        | NaN          | CD99,CXCL16,EZR,GNAI2,GNAI3,HRH1,ICAM1,IL1R1,MMP11,NGFR,SDC1,TNFRSF11B,TNFRSF1B                                                                                                |
| Granzyme A Signaling                                                            | 2Gy 4h           | 0.00          | 0.17        | NaN          | APEX1                                                                                                                                                                          |
| Granzyme B Signaling                                                            | 2Gy 2h           | 0.92          | 0.33        | NaN          | CASP3,CASP8,LMNB1                                                                                                                                                              |
| Granzyme B Signaling                                                            | 2Gy 4h           | 0.78          | 0.44        | 0.00         | BID,CASP3,ENDOG,LMNB1                                                                                                                                                          |
| Growth Hormone Signaling                                                        | 0.05Gy 2h        | 0.50          | 0.03        | NaN          | SOCS3                                                                                                                                                                          |
| <b>Growth Hormone Signaling</b>                                                 | <b>0.05Gy 4h</b> | <b>1.61</b>   | <b>0.13</b> | <b>0.45</b>  | <b>FOS,JAK2,PRKCD,PRKCI,SOCS6</b>                                                                                                                                              |
| <b>Growth Hormone Signaling</b>                                                 | <b>2Gy 2h</b>    | <b>1.73</b>   | <b>0.28</b> | <b>-1.51</b> | <b>ELK1,IRS1,PDPK1,PIK3CB,PIK3CD,PRKCE,SOCS1,SOCS2,SOCS3,SOCS5,SOCS6</b>                                                                                                       |
| <b>Growth Hormone Signaling</b>                                                 | <b>2Gy 4h</b>    | <b>1.59</b>   | <b>0.40</b> | <b>-0.50</b> | <b>ELK1,FOS,GHR,JAK2,PIK3CB,PIK3CD,PRKCD,PRKCE,PRKCI,PRKD3,SOCS2,SOCS3,SOCS5,SOCS6,SOCS7,SRF</b>                                                                               |
| Guanine and Guanosine Salvage I                                                 | 2Gy 4h           | 0.60          | 1.00        | NaN          | HPRT1                                                                                                                                                                          |
| Gustation Pathway                                                               | 0.05Gy 4h        | 0.00          | 0.02        | NaN          | GNG5                                                                                                                                                                           |
| Gustation Pathway                                                               | 2Gy 2h           | 0.00          | 0.08        | NaN          | CACNA1A,LPAR6,NAPEPLD,PDE4D                                                                                                                                                    |
| Gustation Pathway                                                               | 2Gy 4h           | 0.00          | 0.14        | NaN          | ADCY8,APEX1,CACNA1C,GNG5,ITPR2,PANX1,PRKAR2A                                                                                                                                   |
| Hematopoiesis from Multipotent Stem Cells                                       | 0.05Gy 4h        | 0.46          | 0.10        | NaN          | KITLG                                                                                                                                                                          |

| Inguenuity Canonical Pathways                       | Model            | <b>-log(p-value)</b> | Ratio       | z-score      | Molecules                                                                                                                                                                                                                                                                                                                                                                                                                           |
|-----------------------------------------------------|------------------|----------------------|-------------|--------------|-------------------------------------------------------------------------------------------------------------------------------------------------------------------------------------------------------------------------------------------------------------------------------------------------------------------------------------------------------------------------------------------------------------------------------------|
| Hematopoiesis from Multipotent Stem Cells           | 2Gy 4h           | 0.00                 | 0.20        | NaN          | CSF1,KITLG                                                                                                                                                                                                                                                                                                                                                                                                                          |
| <b>Hematopoiesis from Pluripotent Stem Cells</b>    | <b>0.05Gy 2h</b> | <b>3.34</b>          | <b>0.18</b> | <b>NaN</b>   | <b>IL11,IL12A,IL6</b>                                                                                                                                                                                                                                                                                                                                                                                                               |
| Hematopoiesis from Pluripotent Stem Cells           | 0.05Gy 4h        | 0.28                 | 0.06        | NaN          | KITLG                                                                                                                                                                                                                                                                                                                                                                                                                               |
| Hematopoiesis from Pluripotent Stem Cells           | 2Gy 2h           | 0.36                 | 0.18        | NaN          | CXCL8,IL11,IL6                                                                                                                                                                                                                                                                                                                                                                                                                      |
| Hematopoiesis from Pluripotent Stem Cells           | 2Gy 4h           | 0.00                 | 0.24        | NaN          | CSF1,IL12A,KITLG,LIF                                                                                                                                                                                                                                                                                                                                                                                                                |
| Heme Biosynthesis II                                | 2Gy 2h           | 0.58                 | 0.50        | NaN          | ALAS1                                                                                                                                                                                                                                                                                                                                                                                                                               |
| Heme Degradation                                    | 2Gy 2h           | 0.58                 | 0.50        | NaN          | HMOX1                                                                                                                                                                                                                                                                                                                                                                                                                               |
| Heme Degradation                                    | 2Gy 4h           | 1.20                 | 1.00        | NaN          | HMOX1,HMOX2                                                                                                                                                                                                                                                                                                                                                                                                                         |
| Heparan Sulfate Biosynthesis                        | 0.05Gy 4h        | 0.24                 | 0.05        | NaN          | HS6ST1                                                                                                                                                                                                                                                                                                                                                                                                                              |
| Heparan Sulfate Biosynthesis                        | 2Gy 2h           | 1.29                 | 0.30        | 0.00         | AARS1,CHST11,CHST2,EXT1,HS6ST1,LIPE                                                                                                                                                                                                                                                                                                                                                                                                 |
| Heparan Sulfate Biosynthesis                        | 2Gy 4h           | 0.42                 | 0.30        | 0.00         | AARS1,CES2,EXT1,HS6ST1,LIPE,PRDX6                                                                                                                                                                                                                                                                                                                                                                                                   |
| Heparan Sulfate Biosynthesis (Late Stages)          | 0.05Gy 4h        | 0.25                 | 0.05        | NaN          | HS6ST1                                                                                                                                                                                                                                                                                                                                                                                                                              |
| <b>Heparan Sulfate Biosynthesis (Late Stages)</b>   | <b>2Gy 2h</b>    | <b>1.39</b>          | <b>0.32</b> | <b>0.00</b>  | <b>AARS1,CHST11,CHST2,EXT1,HS6ST1,LIPE</b>                                                                                                                                                                                                                                                                                                                                                                                          |
| Heparan Sulfate Biosynthesis (Late Stages)          | 2Gy 4h           | 0.48                 | 0.32        | 0.00         | AARS1,CES2,EXT1,HS6ST1,LIPE,PRDX6                                                                                                                                                                                                                                                                                                                                                                                                   |
| Hepatic Cholestasis                                 | 0.05Gy 2h        | 1.00                 | 0.03        | NaN          | IL11,IL12A,IL6                                                                                                                                                                                                                                                                                                                                                                                                                      |
| Hepatic Cholestasis                                 | 0.05Gy 4h        | 0.00                 | 0.03        | NaN          | ATP8B1,PRKCD,PRKCI,TGFB1                                                                                                                                                                                                                                                                                                                                                                                                            |
| Hepatic Cholestasis                                 | 2Gy 2h           | 0.00                 | 0.08        | NaN          | CXCL8,IKBKB,IKBKE,IL11,IL6,MAPK8,PRKCE,RXRA,SLC4A2,TNFRSF1B                                                                                                                                                                                                                                                                                                                                                                         |
| Hepatic Cholestasis                                 | 2Gy 4h           | 0.00                 | 0.21        | NaN          | ADCY8,ATP8B1,CLCF1,CNTF,CYP7B1,IL12A,IL1R1,LIF,MAP3K7,MAPK8,NFKB1,NFKBIA,NGFR,NR1H3,PPARA,PRKAR2A,PRKCD,PRKCE,PRKCI,PRKD3,RARA,TGFB1,TNFRSF11B,TNFRSF1B,TNFSF10                                                                                                                                                                                                                                                                     |
| Hepatic Fibrosis / Hepatic Stellate Cell Activation | 0.05Gy 2h        | 0.50                 | 0.02        | NaN          | IL6,KLF6                                                                                                                                                                                                                                                                                                                                                                                                                            |
| Hepatic Fibrosis / Hepatic Stellate Cell Activation | 0.05Gy 4h        | 0.00                 | 0.03        | NaN          | ACTA2,BCL2,TGFB1,TGFBR1                                                                                                                                                                                                                                                                                                                                                                                                             |
| Hepatic Fibrosis / Hepatic Stellate Cell Activation | 2Gy 2h           | 0.00                 | 0.13        | NaN          | ACTA2,BAMBI,CCL2,CXCL8,EDN1,FAS,FGF2,IL4R,IL6,IL6R,KLF6,PDGFA,SERPINE1,SMAD3,SMAD7,TNFRSF1B                                                                                                                                                                                                                                                                                                                                         |
| Hepatic Fibrosis / Hepatic Stellate Cell Activation | 2Gy 4h           | 0.00                 | 0.23        | NaN          | ACTA2,BCL2,CCN2,COL6A2,CSF1,EGFR,FAS,FGF2,FLT1,ICAM1,IFNGR1,IGFBP4,IL1R1,IL4R,IL6R,LEPR,NFKB1,NGFR,PDGFRA,PGF,SMAD2,SMAD3,SMAD4,SMAD7,TGFB1,TGFBR1,TNFRSF11B,TNFRSF1B                                                                                                                                                                                                                                                               |
| Hepatic Fibrosis Signaling Pathway                  | 0.05Gy 2h        | 0.00                 | 0.01        | NaN          | CDKN1B,MYC                                                                                                                                                                                                                                                                                                                                                                                                                          |
| Hepatic Fibrosis Signaling Pathway                  | 0.05Gy 4h        | 0.73                 | 0.06        | 1.16         | ACTA2,BCL2,FOS,FTH1,GNAI2,JAK2,PRKCD,PRKCI,RHOA,RHOG,TGFB1,TGFBR1                                                                                                                                                                                                                                                                                                                                                                   |
| <b>Hepatic Fibrosis Signaling Pathway</b>           | <b>2Gy 2h</b>    | <b>1.51</b>          | <b>0.19</b> | <b>-1.58</b> | <b>ACTA2,ACVR2A,ATF4,BAMBI,CACNA1A,CASP3,CCL2,CDC42,CDKN1B,CEBPB,CXCL8,EDN1,ELK1,FGF2,FTH1,GLI3,IKBKB,IKBKE,IRS2,ITGA5,MAP2K5,MAPK8,MTOR,MYC,PDGFA,PIK3CB,PIK3CD,PRKCE,RAC1,RHOB,RHOQ,RIPK1,RND3,RRAS2,SERPINE1,SMAD3,SMAD7,SNAI1,SOS1,TNFRSF1B</b>                                                                                                                                                                                 |
| <b>Hepatic Fibrosis Signaling Pathway</b>           | <b>2Gy 4h</b>    | <b>2.27</b>          | <b>0.33</b> | <b>-2.29</b> | <b>ACTA2,ACVR1,ACVR1B,ACVR2A,AKT1,ATF2,ATF4,AXIN1,BCL2,BMPR2,CACNA1C,CASP3,CCN2,CTNNA1,ELK1,FGF2,FLT1,FOS,FTH1,FZD1,GLI3,GNAI2,GNAI3,GSK3B,HIF1A,HRAS,ICAM1,IL17RA,IL1R1,JAK2,KRAS,LEF1,LEPR,MAP2K1,MAP3K7,MAPK8,NFKB1,NFKBIA,NGFR,NOX4,PDGFRA,PDGF,PIK3CB,PIK3CD,PRKAR2A,PRKCD,PRKCE,PRKCI,PRKD3,PTCH1,PTEN,RAC3,RHOA,RIPK1,ROCK1,ROCK2,RRAS2,SMAD2,SMAD3,SMAD4,SMAD7,SP1,TCF4,TCF7,TGFB1,TGFBR1,TNFRSF11B,TNFRSF1B,WNT5A,YAP1</b> |
| HER-2 Signaling in Breast Cancer                    | 0.05Gy 2h        | 0.42                 | 0.02        | NaN          | CDKN1B                                                                                                                                                                                                                                                                                                                                                                                                                              |
| HER-2 Signaling in Breast Cancer                    | 0.05Gy 4h        | 0.80                 | 0.08        | NaN          | CDKN1A,MDM2,PRKCD,PRKCI                                                                                                                                                                                                                                                                                                                                                                                                             |
| HER-2 Signaling in Breast Cancer                    | 2Gy 2h           | 1.08                 | 0.22        | NaN          | AREG,CCNE1,CDC42,CDKN1A,CDKN1B,MDM2,PIK3CB,PIK3CD,PRKCE,RRAS2,SOS1                                                                                                                                                                                                                                                                                                                                                                  |
| HER-2 Signaling in Breast Cancer                    | 2Gy 4h           | 1.01                 | 0.34        | NaN          | AKT1,CCNE1,CCNE2,CDKN1A,EGFR,GSK3B,HRAS,ITGB8,KRAS,MDM2,PIK3CB,PIK3CD,PRKCD,PRKCE,PRKCI,PRKD3,RRAS2                                                                                                                                                                                                                                                                                                                                 |
| Hereditary Breast Cancer Signaling                  | 0.05Gy 4h        | 0.53                 | 0.07        | NaN          | CDC25C,CDKN1A,SMARCA4                                                                                                                                                                                                                                                                                                                                                                                                               |

| Inguenuity Canonical Pathways                  | Model            | -log(p-value) | Ratio       | z-score      | Molecules                                                                                                                                                                                 |
|------------------------------------------------|------------------|---------------|-------------|--------------|-------------------------------------------------------------------------------------------------------------------------------------------------------------------------------------------|
| Hereditary Breast Cancer Signaling             | 2Gy 2h           | 0.76          | 0.20        | NaN          | CDKN1A,CHEK1,HDAC6,MSH6,NPM1,PIK3CB,PIK3CD,RRAS2,XPC                                                                                                                                      |
| <b>Hereditary Breast Cancer Signaling</b>      | <b>2Gy 4h</b>    | <b>2.48</b>   | <b>0.44</b> | <b>NaN</b>   | <b>AKT1,ATM,BARD1,BRCA2,CCNB1,CDKN1A,DDB2,E2F1,GADD45A,HRAS,KRAS,MSH6,NPM1,PIK3CB,PIK3CD,PTEN,RRAS2,SMARCA4,UBC,XPC</b>                                                                   |
| HGF Signaling                                  | 0.05Gy 2h        | 0.93          | 0.03        | NaN          | IL6,PTGS2                                                                                                                                                                                 |
| HGF Signaling                                  | 0.05Gy 4h        | 0.56          | 0.06        | 0.00         | CDKN1A,FOS,PRKCD,PRKCI                                                                                                                                                                    |
| HGF Signaling                                  | 2Gy 2h           | 1.02          | 0.21        | -0.58        | CDC42,CDKN1A,ELK1,IL6,ITGA5,MAPK8,PIK3CB,PIK3CD,PRKCE,PTGS2,RAC1,RRAS2,SOS1                                                                                                               |
| <b>HGF Signaling</b>                           | <b>2Gy 4h</b>    | <b>1.30</b>   | <b>0.35</b> | <b>-1.15</b> | <b>AKT1,ATF2,CDKN1A,CDKN2A,ELK1,ETS1,ETS2,FOS,HRAS,KRAS,MAP2K1,MAP3K1,MAP3K7,MAPK8,PIK3CB,PIK3CD,PRKCD,PRKCE,PRKCI,PRKD3,PTGS2,RRAS2</b>                                                  |
| HIF1 $\pm$ Signaling                           | 0.05Gy 4h        | 0.00          | 0.02        | NaN          | MDM2                                                                                                                                                                                      |
| HIF1 $\pm$ Signaling                           | 2Gy 2h           | 0.41          | 0.16        | NaN          | EDN1,MAPK7,MAPK8,MDM2,MMP15,PIK3CB,PIK3CD,RRAS2,SLC2A1                                                                                                                                    |
| HIF1 $\pm$ Signaling                           | 2Gy 4h           | 0.37          | 0.27        | NaN          | AKT1,APEX1,HIF1A,HRAS,KRAS,MAPK8,MDM2,MMP11,NAA10,PGF,PIK3CB,PIK3CD,RRAS2,SLC2A1,SLC2A5                                                                                                   |
| HIPPO signaling                                | 2Gy 2h           | 1.21          | 0.27        | -0.82        | FRMD6,PPP2CA,RASSF1,SMAD3,STK3,TEAD4,TP53BP2                                                                                                                                              |
| <b>HIPPO signaling</b>                         | <b>2Gy 4h</b>    | <b>3.43</b>   | <b>0.58</b> | <b>0.00</b>  | <b>AMOT,CD44,DLG1,LATS1,PPP1CA,PPP2CA,RASSF1,SMAD2,SMAD3,SMAD4,STK4,TEAD1,TEAD4,TP53BP2,YAP1</b>                                                                                          |
| <b>Histidine Degradation III</b>               | <b>0.05Gy 4h</b> | <b>1.37</b>   | <b>1.00</b> | <b>NaN</b>   | <b>MTHFD2</b>                                                                                                                                                                             |
| Histidine Degradation III                      | 2Gy 2h           | 0.85          | 1.00        | NaN          | MTHFD2                                                                                                                                                                                    |
| Histidine Degradation VI                       | 2Gy 4h           | 0.00          | 0.20        | NaN          | CYP7B1                                                                                                                                                                                    |
| <b>HMGB1 Signaling</b>                         | <b>0.05Gy 2h</b> | <b>1.39</b>   | <b>0.04</b> | <b>NaN</b>   | <b>IL11,IL12A,IL6</b>                                                                                                                                                                     |
| <b>HMGB1 Signaling</b>                         | <b>0.05Gy 4h</b> | <b>0.33</b>   | <b>0.05</b> | <b>2.00</b>  | <b>FOS,RHOA,RHOG,TGFB1</b>                                                                                                                                                                |
| HMGB1 Signaling                                | 2Gy 2h           | 1.18          | 0.21        | 0.00         | CCL2,CDC42,CXCL8,ELK1,IL11,IL6,MAP2K5,MAPK8,PIK3CB,PIK3CD,RAC1,RHOB,RHOQ,RND3,RRAS2,SERPINE1,TNFRSF1B                                                                                     |
| HMGB1 Signaling                                | 2Gy 4h           | 1.13          | 0.33        | 0.00         | AKT1,CLCF1,CNTF,ELK1,FOS,HRAS,ICAM1,IFNGR1,IL12A,IL1R1,KRAS,LIF,MAP2K1,MAPK8,NFKB1,NGFR,PIK3CB,PIK3CD,RAC3,RBBP7,RHOA,RRAS2,SP1,TGFB1,TNFRSF11B,TNFRSF1B,TNFSF10                          |
| HOTAIR Regulatory Pathway                      | 0.05Gy 2h        | 0.67          | 0.02        | NaN          | MYC,SNAI2                                                                                                                                                                                 |
| HOTAIR Regulatory Pathway                      | 0.05Gy 4h        | 0.71          | 0.06        | -0.82        | CDKN1A,HSF1,JARID2,MDM2,REST,TGFB1                                                                                                                                                        |
| HOTAIR Regulatory Pathway                      | 2Gy 2h           | 0.00          | 0.09        | -0.71        | CDKN1A,EED,MDM2,MMP15,MYC,PIK3CB,PIK3CD,SNAI2                                                                                                                                             |
| <b>HOTAIR Regulatory Pathway</b>               | <b>2Gy 4h</b>    | <b>1.37</b>   | <b>0.33</b> | <b>-1.62</b> | <b>AKT1,CD44,CDKN1A,CTNNB1,EED,HSF1,ICAM1,JARID2,KDM1A,KMT2A,LEF1,MDM2,mir-29,MMP11,MRTFA,NFKB1,NFKBIA,PIK3CB,PIK3CD,PTEN,RBBP7,REST,ROCK1,ROCK2,SNAI2,SRF,TCF4,TCF7,TGFB1,WNT5A,XIAP</b> |
| Human Embryonic Stem Cell Pluripotency         | 0.05Gy 4h        | 0.00          | 0.02        | NaN          | TGFB1,TGFBR1                                                                                                                                                                              |
| Human Embryonic Stem Cell Pluripotency         | 2Gy 2h           | 0.00          | 0.12        | NaN          | BDNF,FGF2,INHBA,PDGFA,PDPK1,PIK3CB,PIK3CD,S1PR3,SMAD3,SMAD7                                                                                                                               |
| Human Embryonic Stem Cell Pluripotency         | 2Gy 4h           | 0.94          | 0.31        | NaN          | ACVR1,AKT1,AXIN1,BMP1,BMP2,BMP4,BMPR2,CTNNB1,FGF2,FZD1,GSK3B,INHBA,LEF1,PDGFRA,PIK3CB,PIK3CD,SMAD2,SMAD3,SMAD4,SMAD6,SMAD7,TCF4,TCF7,TGFB1,TGFBR1,WNT5A                                   |
| Huntington's Disease Signaling                 | 0.05Gy 4h        | 0.31          | 0.05        | 1.00         | GNG5,PRKCD,PRKCI,REST                                                                                                                                                                     |
| <b>Huntington's Disease Signaling</b>          | <b>2Gy 2h</b>    | <b>1.06</b>   | <b>0.20</b> | <b>-2.31</b> | <b>ATF4,BCL2L1,BDNF,CASP3,CASP8,HDAC6,HSPA9,MAPK8,MTOR,NCOR2,PDPK1,PIK3CB,PIK3CD,PRKCE,SGK1,SOS1,STX16</b>                                                                                |
| Huntington's Disease Signaling                 | 2Gy 4h           | 0.52          | 0.28        | 1.50         | AKT1,ATF2,ATF4,ATP5F1A,ATP5PF,BCL2L1,CASP3,CDK5R1,CTSD,EGFR,GNG5,HRAS,HSPA6,HSPA8,MAPK8,PIK3CB,PIK3CD,PRKCD,PRKCE,PRKCI,PRKD3,REST,SP1,UBC                                                |
| Hypoxia Signaling in the Cardiovascular System | 0.05Gy 4h        | 0.46          | 0.07        | NaN          | MDM2,UBE2I                                                                                                                                                                                |
| Hypoxia Signaling in the Cardiovascular System | 2Gy 2h           | 0.00          | 0.14        | NaN          | ATF4,EDN1,MDM2,UBE2E1                                                                                                                                                                     |
| Hypoxia Signaling in the Cardiovascular System | 2Gy 4h           | 1.07          | 0.38        | 0.71         | AKT1,ATF2,ATF4,ATM,HIF1A,HSP90AB1,MDM2,NFKBIA,P4HB,PTEN,UBE2I                                                                                                                             |
| Hypusine Biosynthesis                          | 2Gy 4h           | 0.60          | 1.00        | NaN          | EIF5A                                                                                                                                                                                     |

| Inguenuity Canonical Pathways                        | Model         | <b>-log(p-value)</b> | Ratio       | z-score      | Molecules                                                                                                                                                 |
|------------------------------------------------------|---------------|----------------------|-------------|--------------|-----------------------------------------------------------------------------------------------------------------------------------------------------------|
| I±-Adrenergic Signaling                              | 0.05Gy 4h     | 1.07                 | 0.10        | NaN          | GNAI2,GNG5,PRKCD,PRKCI                                                                                                                                    |
| I±-Adrenergic Signaling                              | 2Gy 2h        | 0.00                 | 0.05        | NaN          | PRKCE,RRAS2                                                                                                                                               |
| I±-Adrenergic Signaling                              | 2Gy 4h        | 0.99                 | 0.35        | -0.30        | ADCY8,GNAI2,GNAI3,GNG5,HRAS,ITPR2,KRAS,MAP2K1,PRKAR2A,PRKCD,PRKCE,PRKCI,PRKD3,RRAS2                                                                       |
| I <sup>3</sup> -glutamyl Cycle                       | 2Gy 4h        | 0.24                 | 0.33        | NaN          | GCLC                                                                                                                                                      |
| I <sup>3</sup> -linolenate Biosynthesis II (Animals) | 2Gy 4h        | 0.00                 | 0.17        | NaN          | FADS1                                                                                                                                                     |
| iCOS-iCOSL Signaling in T Helper Cells               | 0.05Gy 4h     | 0.00                 | 0.02        | NaN          | NFATC1                                                                                                                                                    |
| iCOS-iCOSL Signaling in T Helper Cells               | 2Gy 2h        | 1.03                 | 0.22        | -2.11        | CAMK2G,IKBKB,IKBKE,NFATC1,NFATC4,PDPK1,PIK3CB,PIK3CD,PPP3CC,PPP3R1,RAC1                                                                                   |
| iCOS-iCOSL Signaling in T Helper Cells               | 2Gy 4h        | 0.28                 | 0.26        | -1.51        | AKT1,ITPR2,NFAT5,NFATC1,NFKB1,NFKBIA,PIK3CB,PIK3CD,PPP3CA,PPP3CB,PPP3CC,PPP3R1,PTEN                                                                       |
| IGF-1 Signaling                                      | 0.05Gy 2h     | 0.38                 | 0.02        | NaN          | SOCS3                                                                                                                                                     |
| IGF-1 Signaling                                      | 0.05Gy 4h     | 0.68                 | 0.07        | 0.00         | FOS,JAK2,PRKCI,SOCS6                                                                                                                                      |
| <b>IGF-1 Signaling</b>                               | <b>2Gy 2h</b> | <b>2.07</b>          | <b>0.27</b> | <b>-1.07</b> | <b>CCN1,ELK1,IRS1,IRS2,MAPK8,PDPK1,PIK3CB,PIK3CD,RRAS2,SOCS1,SOCS2,SOCS3,SOCS5,SOCS6,SOS1</b>                                                             |
| <b>IGF-1 Signaling</b>                               | <b>2Gy 4h</b> | <b>3.01</b>          | <b>0.45</b> | <b>-0.45</b> | <b>AKT1,CCN1,CCN2,CSNK2B,ELK1,FOS,FOXO3,HRAS,IGFBP4,IGFBP6,JAK2,KRAS,MAP2K1,MAPK8,PIK3CB,PIK3CD,PRKAR2A,PRKCI,RRAS2,SOCS2,SOCS3,SOCS5,SOCS6,SOCS7,SRF</b> |
| IL-1 Signaling                                       | 0.05Gy 4h     | 0.67                 | 0.08        | NaN          | FOS,GNAI2,GNG5                                                                                                                                            |
| IL-1 Signaling                                       | 2Gy 2h        | 0.00                 | 0.11        | NaN          | GNAO1,IKBKB,IKBKE,MAPK8                                                                                                                                   |
| IL-1 Signaling                                       | 2Gy 4h        | 0.65                 | 0.32        | -1.41        | ADCY8,FOS,GNAI2,GNAI3,GNG5,IL1R1,MAP3K1,MAP3K7,MAPK8,NFKB1,NFKBIA,PRKAR2A                                                                                 |
| IL-10 Signaling                                      | 0.05Gy 2h     | 1.27                 | 0.05        | NaN          | IL6,SOCS3                                                                                                                                                 |
| IL-10 Signaling                                      | 0.05Gy 4h     | 0.00                 | 0.03        | NaN          | FOS                                                                                                                                                       |
| IL-10 Signaling                                      | 2Gy 2h        | 1.00                 | 0.23        | NaN          | ELK1,HMOX1,IKBKB,IKBKE,IL4R,IL6,MAPK8,SOCS3,TYK2                                                                                                          |
| IL-10 Signaling                                      | 2Gy 4h        | 0.54                 | 0.30        | NaN          | ELK1,FOS,HMOX1,IL1R1,IL4R,MAP3K7,MAP4K4,MAPK8,NFKB1,NFKBIA,SOCS3,SP1                                                                                      |
| IL-12 Signaling and Production in Macrophages        | 0.05Gy 2h     | 0.30                 | 0.01        | NaN          | IL12A                                                                                                                                                     |
| IL-12 Signaling and Production in Macrophages        | 0.05Gy 4h     | 0.42                 | 0.05        | NaN          | FOS,PRKCD,PRKCI,TGFB1                                                                                                                                     |
| IL-12 Signaling and Production in Macrophages        | 2Gy 2h        | 0.00                 | 0.12        | NaN          | APOE,CEBPB,IKBKB,IKBKE,MAPK8,PIK3CB,PIK3CD,PRKCE,RXRA                                                                                                     |
| IL-12 Signaling and Production in Macrophages        | 2Gy 4h        | 0.00                 | 0.19        | NaN          | AKT1,FOS,IFNGR1,IL12A,MAP2K1,MAPK8,NFKB1,PIK3CB,PIK3CD,PRKCD,PRKCE,PRKCI,PRKD3,TGFB1                                                                      |
| IL-15 Production                                     | 0.05Gy 2h     | 0.38                 | 0.02        | NaN          | IL6                                                                                                                                                       |
| IL-15 Production                                     | 0.05Gy 4h     | 0.66                 | 0.07        | NaN          | JAK2,KIT,PRKCI,YES1                                                                                                                                       |
| IL-15 Production                                     | 2Gy 2h        | 0.00                 | 0.14        | NaN          | EPHA2,EPHB3,EPHB4,IL6,MAP2K5,MERTK,TWF1,TYK2                                                                                                              |
| IL-15 Production                                     | 2Gy 4h        | 0.46                 | 0.28        | NaN          | ABL1,DDR1,EGFR,EPHA2,EPHB4,FLT1,JAK2,KIT,MAP2K1,MERTK,NFKB1,PDGFRA,PRKCI,PTK2B, SRC,YES1                                                                  |
| IL-15 Signaling                                      | 0.05Gy 2h     | 0.53                 | 0.03        | NaN          | IL6                                                                                                                                                       |
| IL-15 Signaling                                      | 0.05Gy 4h     | 0.00                 | 0.03        | NaN          | JAK2                                                                                                                                                      |
| IL-15 Signaling                                      | 2Gy 2h        | 0.59                 | 0.19        | NaN          | BCL2L1,CXCL8,IL6,PIK3CB,PIK3CD,RRAS2,TYK2                                                                                                                 |
| IL-15 Signaling                                      | 2Gy 4h        | 0.51                 | 0.30        | NaN          | AKT1,BCL2L1,HRAS,JAK2,KRAS,MAP2K1,NFKB1,PIK3CB,PIK3CD,RAC3,RRAS2                                                                                          |
| IL-17 Signaling                                      | 0.05Gy 2h     | 1.18                 | 0.04        | NaN          | IL6,PTGS2                                                                                                                                                 |
| IL-17 Signaling                                      | 0.05Gy 4h     | 0.00                 | 0.02        | NaN          | JAK2                                                                                                                                                      |
| <b>IL-17 Signaling</b>                               | <b>2Gy 2h</b> | <b>1.74</b>          | <b>0.27</b> | <b>NaN</b>   | <b>CCL2,CEBPB,CXCL1,CXCL8,ELK1,IL19,IL6,MAPK8,PIK3CB,PIK3CD,PTGS2,RRAS2</b>                                                                               |
| IL-17 Signaling                                      | 2Gy 4h        | 1.13                 | 0.36        | NaN          | AKT1,ATF2,ELK1,GSK3B,HRAS,IL17RA,JAK2,KRAS,MAP2K1,MAP3K7,MAPK8,NFKB1,PIK3CB,PIK3CD,PTGS2,RRAS2                                                            |
| IL-17A Signaling in Airway Cells                     | 0.05Gy 2h     | 0.52                 | 0.03        | NaN          | IL6                                                                                                                                                       |
| IL-17A Signaling in Airway Cells                     | 0.05Gy 4h     | 0.00                 | 0.03        | NaN          | JAK2                                                                                                                                                      |
| IL-17A Signaling in Airway Cells                     | 2Gy 2h        | 1.12                 | 0.24        | -1.41        | CXCL1,IKBKB,IKBKE,IL19,IL6,MAPK8,PIK3CB,PIK3CD,TYK2                                                                                                       |

| Ingenuity Canonical Pathways           | Model                  | -log(p-value)        | Ratio                | z-score               | Molecules                                                                                                                                                                                                         |
|----------------------------------------|------------------------|----------------------|----------------------|-----------------------|-------------------------------------------------------------------------------------------------------------------------------------------------------------------------------------------------------------------|
| IL-17A Signaling in Airway Cells       | 2Gy 4h                 | 0.65                 | 0.32                 | -1.51                 | AKT1,GSK3B,IL17RA,JAK2,MAP2K1,MAP3K7,MAPK8,NFKB1,NFKBIA,PIK3CB,PIK3CD,PTEN                                                                                                                                        |
| <b>IL-17A Signaling in Fibroblasts</b> | <b>0.05Gy 2h</b>       | <b>1.84</b>          | <b>0.10</b>          | <b>NaN</b>            | <b>IL6,NFKBIZ</b>                                                                                                                                                                                                 |
| IL-17A Signaling in Fibroblasts        | 0.05Gy 4h              | 0.24                 | 0.05                 | NaN                   | FOS                                                                                                                                                                                                               |
| <b>IL-17A Signaling in Fibroblasts</b> | <b>2Gy 2h</b>          | <b>2.42</b>          | <b>0.40</b>          | <b>NaN</b>            | <b>CCL2,CCL7,CEBPB,CEBPD,IKBKB,IKBKE,IL6,NFKBIZ</b>                                                                                                                                                               |
| IL-17A Signaling in Fibroblasts        | 2Gy 4h                 | 0.67                 | 0.35                 | NaN                   | CEBPD,FOS,GSK3B,IL17RA,MAP3K7,NFKB1,NFKBIA                                                                                                                                                                        |
| IL-17A Signaling in Gastric Cells      | 0.05Gy 4h              | 0.32                 | 0.07                 | NaN                   | FOS                                                                                                                                                                                                               |
| IL-17A Signaling in Gastric Cells      | 2Gy 2h                 | 0.45                 | 0.20                 | NaN                   | CXCL1,CXCL8,MAPK8                                                                                                                                                                                                 |
| IL-17A Signaling in Gastric Cells      | 2Gy 4h                 | 0.50                 | 0.33                 | -1.00                 | EGFR,FOS,IL17RA,MAPK8,NFKB1                                                                                                                                                                                       |
| IL-2 Signaling                         | 0.05Gy 4h              | 0.00                 | 0.03                 | NaN                   | FOS                                                                                                                                                                                                               |
| IL-2 Signaling                         | 2Gy 2h                 | 0.76                 | 0.21                 | -0.82                 | ELK1,MAPK8,PIK3CB,PIK3CD,RRAS2,SOCS1,SOS1                                                                                                                                                                         |
| IL-2 Signaling                         | 2Gy 4h                 | 1.01                 | 0.36                 | 0.00                  | AKT1,CSNK2B,ELK1,FOS,HRAS,KRAS,MAP2K1,MAPK8,PIK3CB,PIK3CD,PTK2B,RRAS2                                                                                                                                             |
| IL-22 Signaling                        | 0.05Gy 2h              | 0.97                 | 0.08                 | NaN                   | SOCS3                                                                                                                                                                                                             |
| IL-22 Signaling                        | 2Gy 2h                 | 0.63                 | 0.25                 | NaN                   | MAPK8,SOCS3,TYK2                                                                                                                                                                                                  |
| IL-22 Signaling                        | 2Gy 4h                 | 0.45                 | 0.33                 | 0.00                  | AKT1,IL22RA1,MAPK8,SOCS3                                                                                                                                                                                          |
| IL-23 Signaling Pathway                | 0.05Gy 2h              | 0.63                 | 0.04                 | NaN                   | SOCS3                                                                                                                                                                                                             |
| IL-23 Signaling Pathway                | 0.05Gy 4h              | 0.00                 | 0.04                 | NaN                   | JAK2                                                                                                                                                                                                              |
| IL-23 Signaling Pathway                | 2Gy 2h                 | 0.45                 | 0.18                 | -1.34                 | PIK3CB,PIK3CD,RUNX1,SOCS3,TYK2                                                                                                                                                                                    |
| IL-23 Signaling Pathway                | 2Gy 4h                 | 0.86                 | 0.36                 | -1.90                 | AKT1,HIF1A,JAK2,NFKB1,NFKBIA,PIK3CB,PIK3CD,RORA,RUNX1,SOCS3                                                                                                                                                       |
| IL-3 Signaling                         | 0.05Gy 4h              | 0.95                 | 0.09                 | 0.00                  | FOS,JAK2,PRKCD,PRKCI                                                                                                                                                                                              |
| IL-3 Signaling                         | 2Gy 2h                 | 0.81                 | 0.21                 | -0.33                 | ELK1,PIK3CB,PIK3CD,PPP3CC,PPP3R1,PRKCE,RAC1,RRAS2,SOS1                                                                                                                                                            |
| <b>IL-3 Signaling</b>                  | <b>2Gy 4h</b>          | <b>1.84</b>          | <b>0.41</b>          | <b>-0.94</b>          | <b>AKT1,ELK1,FOS,HRAS,JAK2,KRAS,MAP2K1,PIK3CB,PIK3CD,PPP3CA,PPP3CB,PPP3CC,PPP3R1,PRKCD,PRKCE,PRKCI,PRKD3,RRAS2</b>                                                                                                |
| IL-4 Signaling                         | 0.05Gy 4h              | 0.67                 | 0.08                 | NaN                   | JAK2,NFATC1,NR3C1                                                                                                                                                                                                 |
| <b>IL-4 Signaling</b>                  | <b>2Gy 2h</b>          | <b>2.36</b>          | <b>0.32</b>          | <b>NaN</b>            | <b>IL4R,IRS1,MTOR,NFATC1,NFATC4,NR3C2,PIK3CB,PIK3CD,RRAS2,SOCS1,SOS1,TYK2</b>                                                                                                                                     |
| IL-4 Signaling                         | 2Gy 4h                 | 0.46                 | 0.29                 | NaN                   | AKT1,HRAS,IL4R,JAK2,KRAS,NFAT5,NFATC1,NR3C1,PIK3CB,PIK3CD,RRAS2                                                                                                                                                   |
| IL-6 Signaling                         | 0.05Gy 2h              | 0.87                 | 0.03                 | NaN                   | IL6,SOCS3                                                                                                                                                                                                         |
| IL-6 Signaling                         | 0.05Gy 4h              | 0.00                 | 0.03                 | NaN                   | FOS,JAK2                                                                                                                                                                                                          |
| IL-6 Signaling                         | 2Gy 2h                 | 1.28                 | 0.22                 | -0.26                 | CEBPB,CXCL8,ELK1,IKBKB,IKBKE,IL6,IL6R,MAPK8,PIK3CB,PIK3CD,RRAS2,SOCS1,SOCS3,SOS1,TNFRSF1B                                                                                                                         |
| <b>IL-6 Signaling</b>                  | <b>2Gy 4h</b>          | <b>1.36</b>          | <b>0.35</b>          | <b>-1.63</b>          | <b>AKT1,CSNK2B,ELK1,FOS,HRAS,IL1R1,IL6R,IL6ST,JAK2,KRAS,MAP2K1,MAP3K7,MAP4K4,MAPK8,NFKB1,NFKBIA,NGFR,PIK3CB,PIK3CD,RRAS2,SOCS3,SRF,TNFRSF11B,TNFRSF1B</b>                                                         |
| IL-7 Signaling Pathway                 | 0.05Gy 2h              | 1.24                 | 0.05                 | NaN                   | CDKN1B,MYC                                                                                                                                                                                                        |
| IL-7 Signaling Pathway                 | 0.05Gy 4h              | 0.27                 | 0.05                 | NaN                   | BCL2,NFATC1                                                                                                                                                                                                       |
| <a href="#">IL-7 Signaling Pathway</a> | <a href="#">2Gy 2h</a> | <a href="#">1.21</a> | <a href="#">0.24</a> | <a href="#">-2.33</a> | <a href="#">BCL6,CDKN1B,MYC,NFATC1,PDPK1,PIK3CB,PIK3CD,SLC2A1,SOCS1,SOS1</a>                                                                                                                                      |
| IL-7 Signaling Pathway                 | 2Gy 4h                 | 0.00                 | 0.21                 | 0.38                  | AKT1,BCL2,BCL6,FOXO3,GSK3B,NFATC1,PIK3CB,PIK3CD,SLC2A1                                                                                                                                                            |
| IL-8 Signaling                         | 0.05Gy 2h              | 0.20                 | 0.01                 | NaN                   | PTGS2                                                                                                                                                                                                             |
| IL-8 Signaling                         | 0.05Gy 4h              | 1.16                 | 0.08                 | 1.41                  | BCL2,FOS,GNAI2,GNG5,PRKCD,PRKCI,RHOA,RHOG                                                                                                                                                                         |
| IL-8 Signaling                         | 2Gy 2h                 | 1.29                 | 0.20                 | -1.79                 | BCL2L1,CDC42,CXCL1,CXCL8,HMOX1,IKBKB,IKBKE,LIMK2,MAPK8,MTOR,NAPEPLD,PIK3CB,PIK3CD,PLD1,PRKCE,PTGS2,RAC1,RHOB,RHOQ,RND3,RRAS2                                                                                      |
| <b>IL-8 Signaling</b>                  | <b>2Gy 4h</b>          | <b>1.77</b>          | <b>0.35</b>          | <b>0.17</b>           | <b>AKT1,BCL2,BCL2L1,CSTB,EGFR,FLT1,FOS,GNAI2,GNAI3,GNG5,HMOX1,HRAS,ICAM1,KRAS,LIMK2,MAP2K1,MAP4K4,MAPK8,NFKB1,NOX4,PGF,PIK3CB,PIK3CD,PLD1,PRKCD,PRKCE,PRKCI,PRKD3,PTGS2,PTK2B,RAC3,RHOA,ROCK1,ROCK2,RRAS2,SRC</b> |
| <b>IL-9 Signaling</b>                  | <b>0.05Gy 2h</b>       | <b>1.88</b>          | <b>0.11</b>          | <b>NaN</b>            | <b>BCL3,SOCS3</b>                                                                                                                                                                                                 |
| <b>IL-9 Signaling</b>                  | <b>2Gy 2h</b>          | <b>2.58</b>          | <b>0.42</b>          | <b>-1.63</b>          | <b>BCL3,CISH,IRS1,IRS2,PIK3CB,PIK3CD,SOCS2,SOCS3</b>                                                                                                                                                              |
| IL-9 Signaling                         | 2Gy 4h                 | 0.27                 | 0.26                 | -1.00                 | NFKB1,PIK3CB,PIK3CD,SOCS2,SOCS3                                                                                                                                                                                   |

| Ingenuity Canonical Pathways                        | Model            | <b>-log(p-value)</b> | Ratio       | z-score      | Molecules                                                                                                                                                         |
|-----------------------------------------------------|------------------|----------------------|-------------|--------------|-------------------------------------------------------------------------------------------------------------------------------------------------------------------|
| <b>ILK Signaling</b>                                | <b>0.05Gy 2h</b> | <b>1.36</b>          | <b>0.04</b> | <b>NaN</b>   | <b>MYC,PTGS2,SNAI2</b>                                                                                                                                            |
| ILK Signaling                                       | 0.05Gy 4h        | 0.54                 | 0.06        | 1.34         | ACTA2,FERMT2,FOS,RHOA,RHOG                                                                                                                                        |
| <b>ILK Signaling</b>                                | <b>2Gy 2h</b>    | <b>2.60</b>          | <b>0.26</b> | <b>-1.96</b> | <b>ACTA2,ATF4,CASP3,CDC42,FERMT2,IRS1,IRS2,MAPK8,MTOR,MYC,PDPK1,PIK3CB,PIK3CD,PPP2CA,PTGS2,RAC1,RHOB,RHOQ,RND3,SNAI1,SNAI2,TGFB11</b>                             |
| ILK Signaling                                       | 2Gy 4h           | 1.02                 | 0.32        | 0.82         | ACTA2,AKT1,ATF2,ATF4,BMP2,CASP3,CFL1,CTNNB1,FERMT2,FOS,GSK3B,HIF1A,ITGB8,KRT18,LEF1,MAPK8,NFKB1,PGF,PIK3CB,PIK3CD,PPP2CA,PTEN,PTGS2,RAC3,RHOA,SNAI2,TMSB10/TMSB4X |
| Induction of Apoptosis by HIV1                      | 0.05Gy 2h        | 0.61                 | 0.03        | NaN          | BBC3                                                                                                                                                              |
| Induction of Apoptosis by HIV1                      | 0.05Gy 4h        | 0.44                 | 0.07        | NaN          | BBC3,BCL2                                                                                                                                                         |
| <b>Induction of Apoptosis by HIV1</b>               | <b>2Gy 2h</b>    | <b>2.79</b>          | <b>0.37</b> | <b>0.91</b>  | <b>BBC3,BCL2L1,BIRC2,CASP3,CASP8,FAS,IKBKB,IKBKE,MAPK8,RIPK1,TNFRSF1B</b>                                                                                         |
| <b>Induction of Apoptosis by HIV1</b>               | <b>2Gy 4h</b>    | <b>2.58</b>          | <b>0.50</b> | <b>0.26</b>  | <b>BBC3,BCL2,BCL2L1,BID,CASP3,FAS,MAPK8,NFKB1,NFKBIA,NGFR,RIPK1,SLC25A5,TNFRSF11B,TNFRSF1B,XIAP</b>                                                               |
| Inflammasome pathway                                | 2Gy 2h           | 0.00                 | 0.08        | NaN          | CASP8                                                                                                                                                             |
| Inflammasome pathway                                | 2Gy 4h           | 0.00                 | 0.23        | NaN          | NFKB1,PANX1,PYCARD                                                                                                                                                |
| Inhibition of Angiogenesis by TSP1                  | 0.05Gy 4h        | 0.57                 | 0.08        | NaN          | TGFB1,TGFBR1                                                                                                                                                      |
| Inhibition of Angiogenesis by TSP1                  | 2Gy 2h           | 0.00                 | 0.08        | NaN          | CASP3,MAPK8                                                                                                                                                       |
| Inhibition of Angiogenesis by TSP1                  | 2Gy 4h           | 0.00                 | 0.25        | -0.45        | AKT1,CASP3,MAPK8,SDC1,TGFB1,TGFBR1                                                                                                                                |
| Inhibition of ARE-Mediated mRNA Degradation Pathway | 2Gy 2h           | 0.00                 | 0.13        | 1.00         | MAPK7,PPP2CA,TNFRSF1B,ZFP36                                                                                                                                       |
| Inhibition of ARE-Mediated mRNA Degradation Pathway | 2Gy 4h           | 0.58                 | 0.31        | 0.00         | AKT1,CNOT7,MAP3K7,NGFR,PPP2CA,PRKAR2A,TNFRSF11B,TNFRSF1B,TNFSF10,ZFP36                                                                                            |
| Inhibition of Matrix Metalloproteases               | 2Gy 2h           | 0.00                 | 0.04        | NaN          | MMP15                                                                                                                                                             |
| Inhibition of Matrix Metalloproteases               | 2Gy 4h           | 0.00                 | 0.11        | NaN          | ADAM17,MMP11,SDC1                                                                                                                                                 |
| iNOS Signaling                                      | 0.05Gy 4h        | 0.66                 | 0.10        | NaN          | FOS,JAK2                                                                                                                                                          |
| iNOS Signaling                                      | 2Gy 2h           | 0.23                 | 0.14        | NaN          | IKBKB,IKBKE,TYK2                                                                                                                                                  |
| iNOS Signaling                                      | 2Gy 4h           | 0.00                 | 0.24        | -0.45        | FOS,IFNGR1,JAK2,NFKB1,NFKBIA                                                                                                                                      |
| Insulin Receptor Signaling                          | 0.05Gy 2h        | 0.36                 | 0.02        | NaN          | SOCS3                                                                                                                                                             |
| Insulin Receptor Signaling                          | 0.05Gy 4h        | 0.00                 | 0.03        | NaN          | JAK2,PRKCI                                                                                                                                                        |
| <b>Insulin Receptor Signaling</b>                   | <b>2Gy 2h</b>    | <b>1.46</b>          | <b>0.23</b> | <b>-1.60</b> | <b>IRS1,IRS2,LIPE,MAPK8,MTOR,NCK1,PDPK1,PIK3CB,PIK3CD,RHOQ,RRAS2,SGK1,SOCS3,SOS1</b>                                                                              |
| Insulin Receptor Signaling                          | 2Gy 4h           | 0.83                 | 0.32        | 0.00         | AKT1,CRK,FOXO3,GSK3B,HRAS,JAK2,KRAS,LIPE,MAP2K1,MAPK8,PIK3CB,PIK3CD,PPP1CA,PRKAR2A,PRKCI,PTEN,RRAS2,SOCS3,STXBP4                                                  |
| Integrin Signaling                                  | 0.05Gy 4h        | 0.62                 | 0.06        | 1.34         | ACTA2,ARF3,ARF6,RHOA,RHOG                                                                                                                                         |
| Integrin Signaling                                  | 2Gy 2h           | 1.10                 | 0.20        | -1.29        | ACTA2,ARF4,ARF6,CDC42,ITGA5,MAPK8,NCK1,NEDD9,PIK3CB,PIK3CD,RAC1,RHOB,RHOQ,RND3,RRAS2,SOS1                                                                         |
| Integrin Signaling                                  | 2Gy 4h           | 0.96                 | 0.32        | -0.60        | ABL1,ACTA2,AKT1,ARF1,ARF3,ARF4,ARF5,ARF6,BCAR1,CRK,GSK3B,HRAS,ITGB8,KRAS,MAP2K1,MAPK8,PFN1,PIK3CB,PIK3CD,PTEN,RAC3,RHOA,ROCK1,RRAS2,SRC                           |
| <b>Interferon Signaling</b>                         | <b>0.05Gy 4h</b> | <b>1.91</b>          | <b>0.18</b> | <b>1.00</b>  | <b>BCL2,IFITM1,JAK2,TAP1</b>                                                                                                                                      |
| Interferon Signaling                                | 2Gy 2h           | 0.00                 | 0.14        | NaN          | PTPN2,SOCS1,TYK2                                                                                                                                                  |
| Interferon Signaling                                | 2Gy 4h           | 0.79                 | 0.36        | 1.41         | BCL2,IFIT1,IFITM1,IFITM3,IFNGR1,JAK2,MX1,TAP1                                                                                                                     |
| Intrinsic Prothrombin Activation Pathway            | 2Gy 4h           | 0.00                 | 0.06        | NaN          | THBD                                                                                                                                                              |
| Iron homeostasis signaling pathway                  | 0.05Gy 2h        | 0.39                 | 0.02        | NaN          | IL6                                                                                                                                                               |
| Iron homeostasis signaling pathway                  | 0.05Gy 4h        | 0.39                 | 0.05        | NaN          | ATP6V1B2,FTH1,JAK2                                                                                                                                                |
| Iron homeostasis signaling pathway                  | 2Gy 2h           | 0.62                 | 0.18        | NaN          | ATP6V0A1,FTH1,HMOX1,HSPA9,IL6,IL6R,PDGFA,SLC46A1,SMAD3,TYK2                                                                                                       |
| <b>Iron homeostasis signaling pathway</b>           | <b>2Gy 4h</b>    | <b>1.40</b>          | <b>0.36</b> | <b>NaN</b>   | <b>ATP6V0A1,ATP6V1B2,ATP6V1E1,BMP1,BMP2,BMP4,BMPR2,EGFR,FTH1,HIF1A,HMOX1,HMOX2,IL6R,ISCU,JAK2,PDGFRA,SLC11A2,SMAD2,SMAD3,SMAD4</b>                                |
| Isoleucine Degradation I                            | 2Gy 4h           | 1.20                 | 1.00        | NaN          | DLD,HSD17B10                                                                                                                                                      |

| Ingenuity Canonical Pathways                             | Model            | $-\log(p\text{-value})$ | Ratio       | z-score      | Molecules                                                                                                                                     |
|----------------------------------------------------------|------------------|-------------------------|-------------|--------------|-----------------------------------------------------------------------------------------------------------------------------------------------|
| JAK/Stat Signaling                                       | 0.05Gy 2h        | 1.29                    | 0.05        | NaN          | IL6,SOCS3                                                                                                                                     |
| JAK/Stat Signaling                                       | 0.05Gy 4h        | 1.10                    | 0.10        | 0.00         | CDKN1A,FOS,JAK2,SOCS6                                                                                                                         |
| <b>JAK/Stat Signaling</b>                                | <b>2Gy 2h</b>    | <b>4.53</b>             | <b>0.41</b> | <b>-1.00</b> | <b>BCL2L1,CDKN1A,CEBPB,CISH,IL6,MTOR,PIK3CB,PIK3CD,RRAS2,SOCS1,SOCS2,SOCS3,SOCS5,SOCS6,SOS1,TYK2</b>                                          |
| <b>JAK/Stat Signaling</b>                                | <b>2Gy 4h</b>    | <b>2.08</b>             | <b>0.44</b> | <b>0.24</b>  | <b>AKT1,BCL2L1,CDKN1A,FOS,HRAS,JAK2,KRAS,MAP2K1,NFKB1,PIK3CB,PIK3CD,RRAS2,SOCS2,SOCS3,SOCS5,SOCS6,SOCS7</b>                                   |
| Ketogenesis                                              | 2Gy 2h           | 0.58                    | 0.50        | NaN          | HMGCS1                                                                                                                                        |
| Ketogenesis                                              | 2Gy 4h           | 0.36                    | 0.50        | NaN          | HMGCS1                                                                                                                                        |
| Leptin Signaling in Obesity                              | 0.05Gy 2h        | 0.52                    | 0.03        | NaN          | SOCS3                                                                                                                                         |
| Leptin Signaling in Obesity                              | 0.05Gy 4h        | 0.00                    | 0.03        | NaN          | JAK2                                                                                                                                          |
| Leptin Signaling in Obesity                              | 2Gy 2h           | 0.00                    | 0.08        | NaN          | PIK3CB,PIK3CD,SOCS3                                                                                                                           |
| Leptin Signaling in Obesity                              | 2Gy 4h           | 0.00                    | 0.24        | -0.38        | ADCY8,AKT1,JAK2,LEPR,MAP2K1,PIK3CB,PIK3CD,PRKAR2A,SOCS3                                                                                       |
| Leukocyte Extravasation Signaling                        | 0.05Gy 4h        | 0.72                    | 0.07        | 1.63         | ACTA2,GNAI2,PRKCD,PRKCI,RHOA,VAV2                                                                                                             |
| Leukocyte Extravasation Signaling                        | 2Gy 2h           | 0.00                    | 0.10        | -0.33        | ACTA2,CDC42,ITGA5,MAPK8,MMP15,PIK3CB,PIK3CD,PRKCE,RAC1                                                                                        |
| Leukocyte Extravasation Signaling                        | 2Gy 4h           | 0.45                    | 0.27        | -0.82        | ABL1,ACTA2,BCAR1,CD44,CD99,CRK,CTNNB1,EZR,GNAI2,GNAI3,ICAM1,MAPK8,MMP11,PIK3CB,PIK3CD,PRKCD,PRKCE,PRKCI,PRKD3,PTK2B,RHOA,ROCK1,ROCK2,SRC,VAV2 |
| Lipid Antigen Presentation by CD1                        | 0.05Gy 4h        | 0.64                    | 0.17        | NaN          | ARF6                                                                                                                                          |
| Lipid Antigen Presentation by CD1                        | 2Gy 2h           | 0.22                    | 0.17        | NaN          | ARF6                                                                                                                                          |
| Lipid Antigen Presentation by CD1                        | 2Gy 4h           | 0.33                    | 0.33        | NaN          | ARF6,CALR                                                                                                                                     |
| LPS/IL-1 Mediated Inhibition of RXR Function             | 0.05Gy 4h        | 0.00                    | 0.03        | NaN          | HS6ST1,NR1H2,PPARGC1B                                                                                                                         |
| LPS/IL-1 Mediated Inhibition of RXR Function             | 2Gy 2h           | 0.00                    | 0.10        | 1.63         | ALAS1,APOE,CHST11,CHST2,HMGCS1,HS6ST1,MAPK8,PPARGC1A,PPARGC1B,RXRA,TNFRSF1B                                                                   |
| LPS/IL-1 Mediated Inhibition of RXR Function             | 2Gy 4h           | 0.00                    | 0.18        | -1.07        | ALDH18A1,CES2,CPT1A,CPT2,GSTP1,HMGCS1,HS6ST1,IL1R1,MAP3K1,MAP3K7,MAPK8,NGFR,NR1H2,NR1H3,PPARA,PPARGC1B,RARA,SOD3,TNFRSF11B,TNFRSF1B           |
| LPS-stimulated MAPK Signaling                            | 0.05Gy 4h        | 0.60                    | 0.07        | NaN          | FOS,PRKCD,PRKCI                                                                                                                               |
| LPS-stimulated MAPK Signaling                            | 2Gy 2h           | 1.28                    | 0.24        | 0.00         | CDC42,ELK1,IKBKB,IKBKE,MAPK8,PIK3CB,PIK3CD,PRKCE,RAC1,RRAS2                                                                                   |
| <b>LPS-stimulated MAPK Signaling</b>                     | <b>2Gy 4h</b>    | <b>2.21</b>             | <b>0.44</b> | <b>-0.47</b> | <b>ATF2,ELK1,FOS,HRAS,KRAS,MAP2K1,MAP3K7,MAPK8,NFKB1,NFKBIA,PIK3CB,PIK3CD,PRKCD,PRKCE,PRKCI,PRKD3,RRAS2,SRF</b>                               |
| LXR/RXR Activation                                       | 0.05Gy 2h        | 0.76                    | 0.03        | NaN          | IL6,PTGS2                                                                                                                                     |
| LXR/RXR Activation                                       | 0.05Gy 4h        | 0.00                    | 0.03        | NaN          | NR1H2,RXRB                                                                                                                                    |
| LXR/RXR Activation                                       | 2Gy 2h           | 0.00                    | 0.13        | -0.71        | APOE,CCL2,CCL7,HMGCR,IL6,NCOR2,PTGS2,RXRA,RXRB,TNFRSF1B                                                                                       |
| LXR/RXR Activation                                       | 2Gy 4h           | 0.00                    | 0.14        | 1.27         | HMGCR,IL1R1,LDLR,NFKB1,NGFR,NR1H2,NR1H3,PTGS2,RXRB,TNFRSF11B,TNFRSF1B                                                                         |
| <b>Lymphotoxin <math>\beta</math> Receptor Signaling</b> | <b>2Gy 2h</b>    | <b>2.75</b>             | <b>0.39</b> | <b>-1.89</b> | <b>BCL2L1,BIRC2,CASP3,CXCL1,IKBKB,IKBKE,PDPK1,PIK3CB,PIK3CD,RELB</b>                                                                          |
| Lymphotoxin $\beta$ Receptor Signaling                   | 2Gy 4h           | 0.50                    | 0.31        | -1.13        | AKT1,BCL2L1,CASP3,NFKB1,NFKBIA,PIK3CB,PIK3CD,TRAF3                                                                                            |
| Macropinocytosis Signaling                               | 0.05Gy 4h        | 0.92                    | 0.09        | NaN          | ARF6,PRKCD,PRKCI,RHOA                                                                                                                         |
| Macropinocytosis Signaling                               | 2Gy 2h           | 0.76                    | 0.20        | 0.00         | ARF6,CDC42,ITGA5,PDGFA,PIK3CB,PIK3CD,PRKCE,RAC1,RRAS2                                                                                         |
| Macropinocytosis Signaling                               | 2Gy 4h           | 0.67                    | 0.31        | -0.58        | ARF6,CSF1,HRAS,ITGB8,KRAS,PIK3CB,PIK3CD,PRKCD,PRKCE,PRKCI,PRKD3,RHOA,RRAS2,SRC                                                                |
| Maturity Onset Diabetes of Young (MODY) Signaling        | 2Gy 2h           | 0.00                    | 0.08        | NaN          | CACNA1A                                                                                                                                       |
| Maturity Onset Diabetes of Young (MODY) Signaling        | 2Gy 4h           | 0.00                    | 0.15        | NaN          | CACNA1C,GAPDH                                                                                                                                 |
| <b>Mechanisms of Viral Exit from Host Cells</b>          | <b>0.05Gy 4h</b> | <b>1.72</b>             | <b>0.21</b> | <b>NaN</b>   | <b>ACTA2,PRKCD,PRKCI</b>                                                                                                                      |
| Mechanisms of Viral Exit from Host Cells                 | 2Gy 2h           | 0.50                    | 0.21        | NaN          | ACTA2,LMNB1,PRKCE                                                                                                                             |
| Mechanisms of Viral Exit from Host Cells                 | 2Gy 4h           | 0.95                    | 0.43        | NaN          | ACTA2,LMNB1,PRKCD,PRKCE,PRKCI,PRKD3                                                                                                           |
| Melanocyte Development and Pigmentation Signaling        | 0.05Gy 4h        | 0.47                    | 0.06        | NaN          | BCL2,KIT,KITLG                                                                                                                                |
| Melanocyte Development and Pigmentation Signaling        | 2Gy 2h           | 0.26                    | 0.14        | -1.63        | ATF4,MITF,PIK3CB,PIK3CD,RRAS2,SH2B2,SOS1                                                                                                      |



| Ingenuity Canonical Pathways                      | Model                  | -log(p-value)        | Ratio                | z-score               | Molecules                                                                                                                                                                                                                                                                                                                                                                                                                                          |
|---------------------------------------------------|------------------------|----------------------|----------------------|-----------------------|----------------------------------------------------------------------------------------------------------------------------------------------------------------------------------------------------------------------------------------------------------------------------------------------------------------------------------------------------------------------------------------------------------------------------------------------------|
| Melanocyte Development and Pigmentation Signaling | 2Gy 4h                 | 0.85                 | 0.33                 | -0.78                 | ADCY8,ATF2,ATF4,BCL2,CRK,HRAS,KIT,KITLG,KRAS,MAP2K1,PIK3CB,PIK3CD,PRKAR2A,RRAS2,SH2B2,SRC                                                                                                                                                                                                                                                                                                                                                          |
| Melanoma Signaling                                | 0.05Gy 4h              | 0.50                 | 0.07                 | NaN                   | CDKN1A,MDM2                                                                                                                                                                                                                                                                                                                                                                                                                                        |
| Melanoma Signaling                                | 2Gy 2h                 | 0.77                 | 0.22                 | -0.45                 | CDKN1A,MDM2,MITF,PIK3CB,PIK3CD,RRAS2                                                                                                                                                                                                                                                                                                                                                                                                               |
| <b>Melanoma Signaling</b>                         | <b>2Gy 4h</b>          | <b>1.67</b>          | <b>0.44</b>          | <b>0.00</b>           | <b>AKT1,CDKN1A,CDKN2A,E2F1,HRAS,KRAS,MAP2K1,MDM2,PIK3CB,PIK3CD,PTEN,RRAS2</b>                                                                                                                                                                                                                                                                                                                                                                      |
| Melatonin Degradation I                           | 2Gy 4h                 | 0.00                 | 0.05                 | NaN                   | CYP1B1                                                                                                                                                                                                                                                                                                                                                                                                                                             |
| Melatonin Signaling                               | 0.05Gy 4h              | 0.77                 | 0.09                 | NaN                   | GNAI2,PRKCD,PRKCI                                                                                                                                                                                                                                                                                                                                                                                                                                  |
| Melatonin Signaling                               | 2Gy 2h                 | 0.00                 | 0.12                 | -1.00                 | CAMK2G,GNAO1,MAP2K5,PRKCE                                                                                                                                                                                                                                                                                                                                                                                                                          |
| Melatonin Signaling                               | 2Gy 4h                 | 0.31                 | 0.27                 | -0.33                 | GNAI2,GNAI3,MAP2K1,PRKAR2A,PRKCD,PRKCE,PRKCI,PRKD3,RORA                                                                                                                                                                                                                                                                                                                                                                                            |
| Mevalonate Pathway I                              | 2Gy 2h                 | 1.27                 | 0.67                 | NaN                   | HMGCR,HMGCS1                                                                                                                                                                                                                                                                                                                                                                                                                                       |
| Mevalonate Pathway I                              | 2Gy 4h                 | 0.80                 | 0.67                 | NaN                   | HMGCR,HMGCS1                                                                                                                                                                                                                                                                                                                                                                                                                                       |
| MIF Regulation of Innate Immunity                 | 0.05Gy 2h              | 0.80                 | 0.06                 | NaN                   | PTGS2                                                                                                                                                                                                                                                                                                                                                                                                                                              |
| MIF Regulation of Innate Immunity                 | 0.05Gy 4h              | 0.27                 | 0.06                 | NaN                   | FOS                                                                                                                                                                                                                                                                                                                                                                                                                                                |
| MIF Regulation of Innate Immunity                 | 2Gy 2h                 | 0.00                 | 0.11                 | NaN                   | MAPK8,PTGS2                                                                                                                                                                                                                                                                                                                                                                                                                                        |
| MIF Regulation of Innate Immunity                 | 2Gy 4h                 | 0.32                 | 0.28                 | 0.45                  | FOS,MAPK8,NFKB1,NFKBIA,PTGS2                                                                                                                                                                                                                                                                                                                                                                                                                       |
| MIF-mediated Glucocorticoid Regulation            | 0.05Gy 2h              | 0.94                 | 0.08                 | NaN                   | PTGS2                                                                                                                                                                                                                                                                                                                                                                                                                                              |
| MIF-mediated Glucocorticoid Regulation            | 0.05Gy 4h              | 0.37                 | 0.08                 | NaN                   | NR3C1                                                                                                                                                                                                                                                                                                                                                                                                                                              |
| MIF-mediated Glucocorticoid Regulation            | 2Gy 2h                 | 0.00                 | 0.08                 | NaN                   | PTGS2                                                                                                                                                                                                                                                                                                                                                                                                                                              |
| MIF-mediated Glucocorticoid Regulation            | 2Gy 4h                 | 0.38                 | 0.31                 | 1.00                  | NFKB1,NFKBIA,NR3C1,PTGS2                                                                                                                                                                                                                                                                                                                                                                                                                           |
| Mismatch Repair in Eukaryotes                     | 2Gy 2h                 | 1.27                 | 0.67                 | NaN                   | MSH6,PCNA                                                                                                                                                                                                                                                                                                                                                                                                                                          |
| Mismatch Repair in Eukaryotes                     | 2Gy 4h                 | 0.80                 | 0.67                 | NaN                   | MSH6,PCNA                                                                                                                                                                                                                                                                                                                                                                                                                                          |
| Mitochondrial Dysfunction                         | 0.05Gy 4h              | 0.60                 | 0.07                 | NaN                   | BCL2,NDUFS8,NDUFV3                                                                                                                                                                                                                                                                                                                                                                                                                                 |
| Mitochondrial Dysfunction                         | 2Gy 2h                 | 0.00                 | 0.10                 | NaN                   | CASP3,CASP8,MAPK8,PRDX3                                                                                                                                                                                                                                                                                                                                                                                                                            |
| <b>Mitochondrial Dysfunction</b>                  | <b>2Gy 4h</b>          | <b>1.48</b>          | <b>0.39</b>          | <b>NaN</b>            | <b>AIFM1,ATP5F1A,ATP5PF,BCL2,CASP3,CPT1A,HSD17B10,MAPK8,NDUFS1,NDUFS3,NDUFS8,NDUFV1,NDUFV3,PRDX3,PSEN2,VDAC1</b>                                                                                                                                                                                                                                                                                                                                   |
| Mitochondrial L-carnitine Shuttle Pathway         | 2Gy 4h                 | 0.00                 | 0.25                 | NaN                   | CPT1A,CPT2                                                                                                                                                                                                                                                                                                                                                                                                                                         |
| Mitotic Roles of Polo-Like Kinase                 | 0.05Gy 4h              | 0.94                 | 0.14                 | NaN                   | CDC25C,TGFB1                                                                                                                                                                                                                                                                                                                                                                                                                                       |
| Mitotic Roles of Polo-Like Kinase                 | 2Gy 2h                 | 0.22                 | 0.14                 | NaN                   | CDC25B,PPP2CA                                                                                                                                                                                                                                                                                                                                                                                                                                      |
| <a href="#">Mitotic Roles of Polo-Like Kinase</a> | <a href="#">2Gy 4h</a> | <a href="#">0.95</a> | <a href="#">0.43</a> | <a href="#">-2.00</a> | <a href="#">CCNB1,CDC25B,HSP90AB1,PPP2CA,SLK,TGFB1</a>                                                                                                                                                                                                                                                                                                                                                                                             |
| Molecular Mechanisms of Cancer                    | 0.05Gy 2h              | 0.56                 | 0.02                 | NaN                   | BBC3,CDKN1B,MYC                                                                                                                                                                                                                                                                                                                                                                                                                                    |
| <b>Molecular Mechanisms of Cancer</b>             | <b>0.05Gy 4h</b>       | <b>2.53</b>          | <b>0.09</b>          | <b>NaN</b>            | <b>BBC3,BCL2,CDC25C,CDKN1A,E2F4,E2F5,FOS,GNAI2,JAK2,MAX,MDM2,PRKCD,PRKCI,RHOA,RHOG,TGFB1,TGFBR1</b>                                                                                                                                                                                                                                                                                                                                                |
| <b>Molecular Mechanisms of Cancer</b>             | <b>2Gy 2h</b>          | <b>1.49</b>          | <b>0.19</b>          | <b>NaN</b>            | <b>AURKA,BBC3,BCL2L1,BCL2L11,BIRC2,CAMK2G,CASP3,CASP8,CCNE1,CDC25B,CDC42,CDKN1A,CDKN1B,CFLAR,CHEK1,ELK1,FAS,GNAO1,IRS1,ITGA5,MAPK8,MAX,MDM2,MYC,PIK3CB,PIK3CD,PRKCE,RAC1,RHOB,RHOQ,RND3,RRAS2,SMAD3,SMAD7,SOS1,TYK2,ZBTB17</b>                                                                                                                                                                                                                     |
| <b>Molecular Mechanisms of Cancer</b>             | <b>2Gy 4h</b>          | <b>4.53</b>          | <b>0.38</b>          | <b>NaN</b>            | <b>ABL1,ADCY8,AKT1,ARHGEF3,ATM,AURKA,AXIN1,BBC3,BCL2,BCL2L1,BID,BMP1,BMP2,BMP4,BMPR2,CASP3,CCNE1,CCNE2,CDC25B,CDK14,CDKN1A,CDKN2A,CDKN2B,CDKN2D,CFLAR,CRK,CTNNA1,E2F1,E2F5,ELK1,FAS,FOS,FZD1,GNAI2,GNAI3,GSK3B,HIF1A,HRAS,JAK2,KRAS,LEF1,MAP2K1,MAP3K7,MAPK8,MAX,MDM2,NFKB1,NFKBIA,PA2G4,PIK3CB,PIK3CD,PRKAR2A,PRKCD,PRKCE,PRKCI,PRKD3,PSEN2,PTCH1,RAC3,RASGRF1,RBPJ,RHOA,RRAS2,SMAD2,SMAD3,SMAD4,SMAD6,SMAD7,SRC,TCF4,TGFB1,TGFBR1,WNT5A,XIAP</b> |
| Mouse Embryonic Stem Cell Pluripotency            | 0.05Gy 2h              | 0.40                 | 0.02                 | NaN                   | MYC                                                                                                                                                                                                                                                                                                                                                                                                                                                |
| Mouse Embryonic Stem Cell Pluripotency            | 0.05Gy 4h              | 0.00                 | 0.02                 | NaN                   | JAK2                                                                                                                                                                                                                                                                                                                                                                                                                                               |
| Mouse Embryonic Stem Cell Pluripotency            | 2Gy 2h                 | 0.00                 | 0.13                 | -1.13                 | ID3,MYC,PIK3CB,PIK3CD,RRAS2,SOS1,TYK2                                                                                                                                                                                                                                                                                                                                                                                                              |



| Ingenuity Canonical Pathways                                 | Model         | -log(p-value) | Ratio       | z-score      | Molecules                                                                                                                                                                                                                                                                             |
|--------------------------------------------------------------|---------------|---------------|-------------|--------------|---------------------------------------------------------------------------------------------------------------------------------------------------------------------------------------------------------------------------------------------------------------------------------------|
| <b>Mouse Embryonic Stem Cell Pluripotency</b>                | <b>2Gy 4h</b> | <b>3.45</b>   | <b>0.47</b> | <b>0.00</b>  | <b>AKT1,AXIN1,BMP4,BMPR2,CTNNB1,FZD1,GSK3B,HRAS,ID3,ID4,IL6ST,JAK2,KRAS,LEF1,LIF,LIFR,MAP2K1,MAP3K7,PIK3CB,PIK3CD,RRAS2,SMAD4,TCF4,TCF7,XIAP</b>                                                                                                                                      |
| MSP-RON Signaling Pathway                                    | 0.05Gy 2h     | 0.66          | 0.04        | NaN          | IL12A                                                                                                                                                                                                                                                                                 |
| MSP-RON Signaling Pathway                                    | 0.05Gy 4h     | 0.52          | 0.08        | NaN          | ACTA2,JAK2                                                                                                                                                                                                                                                                            |
| MSP-RON Signaling Pathway                                    | 2Gy 2h        | 0.29          | 0.15        | NaN          | ACTA2,CCL2,PIK3CB,PIK3CD                                                                                                                                                                                                                                                              |
| MSP-RON Signaling Pathway                                    | 2Gy 4h        | 0.00          | 0.23        | NaN          | ACTA2,CSF1,IL12A,JAK2,PIK3CB,PIK3CD                                                                                                                                                                                                                                                   |
| mTOR Signaling                                               | 0.05Gy 4h     | 0.80          | 0.07        | 0.45         | PRKCD,PRKCI,RHOA,RHOG,STK11                                                                                                                                                                                                                                                           |
| <b>mTOR Signaling</b>                                        | <b>2Gy 2h</b> | <b>1.63</b>   | <b>0.24</b> | <b>-1.81</b> | <b>CDC42,HMOX1,IRS1,MTOR,NAPEPLD,PDPK1,PIK3CB,PIK3CD,PLD1,PPP2CA,PRKCE,RAC1,RHO B,RHOQ,RND3,RRAS2</b>                                                                                                                                                                                 |
| mTOR Signaling                                               | 2Gy 4h        | 1.20          | 0.34        | -0.50        | AKT1,EIF4A2,FAU,HIF1A,HMOX1,HRAS,KRAS,PGF,PIK3CB,PIK3CD,PLD1,PPP2CA,PRKCD,PRKCE,PRKCI,PRKD3,RAC3,RHOA,RPS19,RPS2,RPS29,RRAS2,STK11                                                                                                                                                    |
| Myc Mediated Apoptosis Signaling                             | 0.05Gy 2h     | 0.58          | 0.03        | NaN          | MYC                                                                                                                                                                                                                                                                                   |
| Myc Mediated Apoptosis Signaling                             | 0.05Gy 4h     | 0.00          | 0.03        | NaN          | BCL2                                                                                                                                                                                                                                                                                  |
| <b>Myc Mediated Apoptosis Signaling</b>                      | <b>2Gy 2h</b> | <b>1.55</b>   | <b>0.28</b> | <b>NaN</b>   | <b>CASP3,CASP8,FAS,MAPK8,MYC,PIK3CB,PIK3CD,RRAS2,SOS1</b>                                                                                                                                                                                                                             |
| Myc Mediated Apoptosis Signaling                             | 2Gy 4h        | 1.10          | 0.38        | NaN          | AKT1,BCL2,BID,CASP3,CDKN2A,FAS,HRAS,KRAS,MAPK8,PIK3CB,PIK3CD,RRAS2                                                                                                                                                                                                                    |
| Myo-inositol Biosynthesis                                    | 2Gy 2h        | 0.58          | 0.50        | NaN          | IMPA2                                                                                                                                                                                                                                                                                 |
| NAD Biosynthesis from 2-amino-3-carboxymuconate Semialdehyde | 2Gy 4h        | 0.60          | 1.00        | NaN          | ABL1                                                                                                                                                                                                                                                                                  |
| NAD biosynthesis II (from tryptophan)                        | 2Gy 4h        | 0.60          | 1.00        | NaN          | ABL1                                                                                                                                                                                                                                                                                  |
| NAD Biosynthesis III                                         | 2Gy 2h        | 0.85          | 1.00        | NaN          | NAMPT                                                                                                                                                                                                                                                                                 |
| NAD Biosynthesis III                                         | 2Gy 4h        | 0.60          | 1.00        | NaN          | NAMPT                                                                                                                                                                                                                                                                                 |
| NADH Repair                                                  | 2Gy 4h        | 0.60          | 1.00        | NaN          | GAPDH                                                                                                                                                                                                                                                                                 |
| Natural Killer Cell Signaling                                | 0.05Gy 4h     | 0.65          | 0.08        | NaN          | PRKCD,PRKCI,VAV2                                                                                                                                                                                                                                                                      |
| Natural Killer Cell Signaling                                | 2Gy 2h        | 0.52          | 0.18        | NaN          | NCK1,PIK3CB,PIK3CD,PRKCE,RAC1,RRAS2,SOS1                                                                                                                                                                                                                                              |
| Natural Killer Cell Signaling                                | 2Gy 4h        | 0.81          | 0.33        | NaN          | AKT1,HRAS,KRAS,MAP2K1,PIK3CB,PIK3CD,PRKCD,PRKCE,PRKCI,PRKD3,RAC3,RRAS2,VAV2                                                                                                                                                                                                           |
| NER Pathway                                                  | 0.05Gy 4h     | 0.42          | 0.09        | NaN          | UBE2I                                                                                                                                                                                                                                                                                 |
| NER Pathway                                                  | 2Gy 2h        | 0.33          | 0.18        | NaN          | PCNA,XPC                                                                                                                                                                                                                                                                              |
| <b>NER Pathway</b>                                           | <b>2Gy 4h</b> | <b>2.12</b>   | <b>0.64</b> | <b>1.89</b>  | <b>CCNH,DDB2,ERCC5,LIG1,PCNA,UBE2I,XPC</b>                                                                                                                                                                                                                                            |
| Netrin Signaling                                             | 0.05Gy 4h     | 0.00          | 0.04        | NaN          | NFATC1                                                                                                                                                                                                                                                                                |
| Netrin Signaling                                             | 2Gy 2h        | 1.21          | 0.27        | -1.13        | CACNA1A,NCK1,NFATC1,NFATC4,PPP3CC,PPP3R1,RAC1                                                                                                                                                                                                                                         |
| Netrin Signaling                                             | 2Gy 4h        | 0.74          | 0.35        | -1.67        | CACNA1C,NFAT5,NFATC1,PPP3CA,PPP3CB,PPP3CC,PPP3R1,PRKAR2A,RAC3                                                                                                                                                                                                                         |
| Neuregulin Signaling                                         | 0.05Gy 2h     | 0.98          | 0.03        | NaN          | CDKN1B,MYC                                                                                                                                                                                                                                                                            |
| Neuregulin Signaling                                         | 0.05Gy 4h     | 0.34          | 0.05        | NaN          | ERBIN,PRKCD,PRKCI                                                                                                                                                                                                                                                                     |
| Neuregulin Signaling                                         | 2Gy 2h        | 0.50          | 0.17        | -1.00        | AREG,CDKN1B,ELK1,ITGA5,MTOR,MYC,PDPK1,PRKCE,RRAS2,SOS1                                                                                                                                                                                                                                |
| Neuregulin Signaling                                         | 2Gy 4h        | 0.70          | 0.31        | -0.78        | ADAM17,AKT1,CDK5R1,CRK,EGFR,ELK1,ERBIN,HRAS,HSP90AB1,KRAS,MAP2K1,PRKCD,PRKCE,PRKCI,PRKD3,PTEN,RRAS2,SRC                                                                                                                                                                               |
| Neuroinflammation Signaling Pathway                          | 0.05Gy 2h     | 0.75          | 0.02        | NaN          | IL12A,IL6,PTGS2                                                                                                                                                                                                                                                                       |
| Neuroinflammation Signaling Pathway                          | 0.05Gy 4h     | 0.00          | 0.04        | -0.82        | BCL2,FOS,JAK2,NFATC1,TGFB1,TGFB1                                                                                                                                                                                                                                                      |
| Neuroinflammation Signaling Pathway                          | 2Gy 2h        | 0.70          | 0.17        | -0.78        | ACVR2A,ATF4,BDNF,BIRC2,CASP3,CASP8,CCL2,CFLAR,CXCL8,FAS,HMOX1,IKBKB,IKBKE,IL6,IL6R,MAPK7,MAPK8,NFATC1,NFATC4,PIK3CB,PIK3CD,PPP3CC,PPP3R1,PTGS2,RIPK1,TYK2                                                                                                                             |
| Neuroinflammation Signaling Pathway                          | 2Gy 4h        | 1.09          | 0.30        | -1.81        | ACVR1,ACVR1B,ACVR2A,AKT1,ATF2,ATF4,BCL2,BMPR2,CASP3,CFLAR,CNTF,CTNNB1,FAS,FOS,FZD1,GABRB2,GDNF,GLUL,GSK3B,HLA-E,HMOX1,ICAM1,IFNGR1,IL12A,IL1R1,IL6R,IRF7,JAK2,MAPK8,NFAT5,NFATC1,NFKB1,NOX4,PIK3CB,PIK3CD,PPP3CA,PPP3CB,PPP3CC,PPP3R1,PSEN2,PTGS2,PYCARD,RIPK1,TGFB1,TGFB1,TRAF3,XIAP |

| Inguenuity Canonical Pathways                        | Model         | -log(p-value) | Ratio       | z-score      | Molecules                                                                                                                                                                             |
|------------------------------------------------------|---------------|---------------|-------------|--------------|---------------------------------------------------------------------------------------------------------------------------------------------------------------------------------------|
| Neuropathic Pain Signaling In Dorsal Horn Neurons    | 0.05Gy 4h     | 0.55          | 0.07        | NaN          | FOS,PRKCD,PRKCI                                                                                                                                                                       |
| Neuropathic Pain Signaling In Dorsal Horn Neurons    | 2Gy 2h        | 0.00          | 0.14        | -1.63        | BDNF,CAMK2G,ELK1,PIK3CB,PIK3CD,PRKCE                                                                                                                                                  |
| Neuropathic Pain Signaling In Dorsal Horn Neurons    | 2Gy 4h        | 0.38          | 0.27        | 0.00         | CAMK1,ELK1,FOS,ITPR2,PIK3CB,PIK3CD,PRKAR2A,PRKCD,PRKCE,PRKCI,PRKD3,SRC                                                                                                                |
| Neuroprotective Role of THOP1 in Alzheimer's Disease | 2Gy 4h        | 0.00          | 0.08        | NaN          | HLA-E,PREP,PRKAR2A                                                                                                                                                                    |
| Neurotrophin/TRK Signaling                           | 0.05Gy 2h     | 1.29          | 0.05        | NaN          | SPRY1,SPRY2                                                                                                                                                                           |
| Neurotrophin/TRK Signaling                           | 0.05Gy 4h     | 0.00          | 0.03        | NaN          | FOS                                                                                                                                                                                   |
| <b>Neurotrophin/TRK Signaling</b>                    | <b>2Gy 2h</b> | <b>2.26</b>   | <b>0.31</b> | <b>-0.58</b> | <b>ATF4,BDNF,CDC42,MAP2K5,MAPK8,PDPK1,PIK3CB,PIK3CD,RRAS2,SOS1,SPRY1,SPRY2</b>                                                                                                        |
| Neurotrophin/TRK Signaling                           | 2Gy 4h        | 0.60          | 0.31        | 0.58         | AKT1,ATF2,ATF4,FOS,HRAS,KRAS,MAP2K1,MAPK8,NGFR,PIK3CB,PIK3CD,RRAS2                                                                                                                    |
| NF- $\hat{\rho}$ B Activation by Viruses             | 0.05Gy 4h     | 0.22          | 0.04        | NaN          | PRKCD,PRKCI                                                                                                                                                                           |
| NF- $\hat{\rho}$ B Activation by Viruses             | 2Gy 2h        | 0.47          | 0.17        | -1.41        | IKBKB,IKBKE,ITGA5,PIK3CB,PIK3CD,PRKCE,RIPK1,RRAS2                                                                                                                                     |
| NF- $\hat{\rho}$ B Activation by Viruses             | 2Gy 4h        | 0.75          | 0.32        | -0.26        | AKT1,EIF2AK2,HRAS,KRAS,MAP3K1,NFKB1,NFKBIA,PIK3CB,PIK3CD,PRKCD,PRKCE,PRKCI,PRKD3,RIPK1,RRAS2                                                                                          |
| NF- $\hat{\rho}$ B Signaling                         | 0.05Gy 4h     | 0.00          | 0.01        | NaN          | TGFBR1                                                                                                                                                                                |
| NF- $\hat{\rho}$ B Signaling                         | 2Gy 2h        | 0.00          | 0.09        | 0.63         | CASP8,IKBKB,MAPK8,PIK3CB,PIK3CD,RELB,RIPK1,RRAS2,TNFAIP3,TNFRSF1B                                                                                                                     |
| NF- $\hat{\rho}$ B Signaling                         | 2Gy 4h        | 0.49          | 0.27        | -2.04        | AKT1,BMP2,BMP4,BMPR2,CSNK2B,EGFR,EIF2AK2,FLT1,GHR,GSK3B,HRAS,IL1R1,KRAS,MAP3K1,MAP3K7,MAP4K4,MAPK8,NFKB1,NFKBIA,NGFR,PDGFRA,PIK3CB,PIK3CD,RIPK1,RRAS2,TGFBR1,TNFRSF11B,TNFRSF1B,TRAF3 |
| NGF Signaling                                        | 0.05Gy 4h     | 0.41          | 0.06        | NaN          | PRKCD,RHOA,RHOG                                                                                                                                                                       |
| <b>NGF Signaling</b>                                 | <b>2Gy 2h</b> | <b>1.55</b>   | <b>0.25</b> | <b>-0.28</b> | <b>ATF4,CDC42,ELK1,IKBKB,IKBKE,MAPK7,MAPK8,PDPK1,PIK3CB,PIK3CD,RAC1,RRAS2,SOS1</b>                                                                                                    |
| <b>NGF Signaling</b>                                 | <b>2Gy 4h</b> | <b>1.58</b>   | <b>0.38</b> | <b>-0.47</b> | <b>AKT1,ATF2,ATF4,CRK,ELK1,HRAS,KRAS,MAP2K1,MAP3K1,MAP3K7,MAPK8,NFKB1,NGFR,PIK3CB,PIK3CD,PRKCD,RHOA,ROCK1,ROCK2,RRAS2</b>                                                             |
| Nicotine Degradation II                              | 2Gy 4h        | 0.00          | 0.06        | NaN          | CYP1B1                                                                                                                                                                                |
| Nicotine Degradation III                             | 2Gy 4h        | 0.00          | 0.06        | NaN          | CYP1B1                                                                                                                                                                                |
| Nitric Oxide Signaling in the Cardiovascular System  | 0.05Gy 4h     | 0.39          | 0.05        | NaN          | PRKCD,PRKCI,SLC7A1                                                                                                                                                                    |
| Nitric Oxide Signaling in the Cardiovascular System  | 2Gy 2h        | 0.00          | 0.07        | -2.00        | CACNA1A,PIK3CB,PIK3CD,PRKCE                                                                                                                                                           |
| Nitric Oxide Signaling in the Cardiovascular System  | 2Gy 4h        | 0.54          | 0.29        | 0.26         | AKT1,ATP2A2,CACNA1C,FLT1,HSP90AB1,ITPR2,MAP2K1,PGF,PIK3CB,PIK3CD,PRKAR2A,PRKCD,PRKCE,PRKCI,PRKD3,SLC7A1                                                                               |
| nNOS Signaling in Neurons                            | 0.05Gy 4h     | 0.63          | 0.09        | NaN          | PRKCD,PRKCI                                                                                                                                                                           |
| nNOS Signaling in Neurons                            | 2Gy 2h        | 0.00          | 0.14        | NaN          | PPP3CC,PPP3R1,PRKCE                                                                                                                                                                   |
| nNOS Signaling in Neurons                            | 2Gy 4h        | 0.79          | 0.36        | -2.00        | PPP3CA,PPP3CB,PPP3CC,PPP3R1,PRKCD,PRKCE,PRKCI,PRKD3                                                                                                                                   |
| nNOS Signaling in Skeletal Muscle Cells              | 2Gy 2h        | 0.00          | 0.09        | NaN          | CACNA1A                                                                                                                                                                               |
| nNOS Signaling in Skeletal Muscle Cells              | 2Gy 4h        | 0.00          | 0.09        | NaN          | CACNA1C                                                                                                                                                                               |
| Non-Small Cell Lung Cancer Signaling                 | 0.05Gy 4h     | 0.00          | 0.02        | NaN          | RXR8                                                                                                                                                                                  |
| Non-Small Cell Lung Cancer Signaling                 | 2Gy 2h        | 0.60          | 0.19        | -1.63        | PDPK1,PIK3CB,PIK3CD,RASSF1,RRAS2,RXRA,RXR8,SOS1                                                                                                                                       |
| <b>Non-Small Cell Lung Cancer Signaling</b>          | <b>2Gy 4h</b> | <b>1.61</b>   | <b>0.40</b> | <b>0.28</b>  | <b>ABL1,AKT1,CDKN2A,E2F1,EGFR,FOXO3,HRAS,ITPR2,KRAS,MAP2K1,PA2G4,PIK3CB,PIK3CD,RASSF1,RRAS2,RXR8,STK4</b>                                                                             |
| Notch Signaling                                      | 0.05Gy 2h     | 0.85          | 0.06        | NaN          | HES1                                                                                                                                                                                  |
| Notch Signaling                                      | 2Gy 2h        | 0.40          | 0.19        | NaN          | HES1,JAG2,LFNG                                                                                                                                                                        |
| Notch Signaling                                      | 2Gy 4h        | 0.43          | 0.31        | 0.00         | ADAM17,LFNG,NOTCH4,PSEN2,RBPJ                                                                                                                                                         |
| NRF2-mediated Oxidative Stress Response              | 0.05Gy 4h     | 0.82          | 0.07        | 0.00         | ACTA2,FOS,FTH1,PRKCD,PRKCI                                                                                                                                                            |
| <b>NRF2-mediated Oxidative Stress Response</b>       | <b>2Gy 2h</b> | <b>1.38</b>   | <b>0.22</b> | <b>0.30</b>  | <b>ACTA2,ATF4,CUL3,FTH1,HMOX1,JUNB,JUND,MAP2K5,MAPK7,MAPK8,PIK3CB,PIK3CD,PRDX1,PRKCE,RRAS2</b>                                                                                        |
| <b>NRF2-mediated Oxidative Stress Response</b>       | <b>2Gy 4h</b> | <b>3.13</b>   | <b>0.43</b> | <b>0.22</b>  | <b>ACTA2,AKT1,ATF4,FOS,FTH1,GCLC,GSK3B,GSTP1,HMOX1,HRAS,JUNB,KRAS,MAP2K1,MAP3K1,MAP3K7,MAPK8,PIK3CB,PIK3CD,PIB,PRDX1,PRKCD,PRKCE,PRKCI,PRKD3,RRAS2,SOD1,SOD3,TXN,VCP</b>              |

| Inguenuity Canonical Pathways             | Model         | <b>-log(p-value)</b> | Ratio       | z-score      | Molecules                                                                                                                                                                                                       |
|-------------------------------------------|---------------|----------------------|-------------|--------------|-----------------------------------------------------------------------------------------------------------------------------------------------------------------------------------------------------------------|
| Nucleotide Excision Repair Pathway        | 2Gy 2h        | 0.44                 | 0.33        | NaN          | XPC                                                                                                                                                                                                             |
| <b>Nucleotide Excision Repair Pathway</b> | <b>2Gy 4h</b> | <b>1.80</b>          | <b>1.00</b> | <b>NaN</b>   | <b>CCNH,ERCC5,XPC</b>                                                                                                                                                                                           |
| Nur77 Signaling in T Lymphocytes          | 0.05Gy 4h     | 0.57                 | 0.08        | NaN          | BCL2,NFATC1                                                                                                                                                                                                     |
| <b>Nur77 Signaling in T Lymphocytes</b>   | <b>2Gy 2h</b> | <b>2.44</b>          | <b>0.38</b> | <b>NaN</b>   | <b>CASP3,MAP2K5,MAPK7,MEF2D,NFATC1,NR4A1,PPP3CC,PPP3R1,RXRA</b>                                                                                                                                                 |
| Nur77 Signaling in T Lymphocytes          | 2Gy 4h        | 0.41                 | 0.29        | NaN          | BCL2,CASP3,NFATC1,PPP3CA,PPP3CB,PPP3CC,PPP3R1                                                                                                                                                                   |
| Oleate Biosynthesis II (Animals)          | 2Gy 4h        | 0.24                 | 0.33        | NaN          | FADS1                                                                                                                                                                                                           |
| Oncostatin M Signaling                    | 0.05Gy 4h     | 0.60                 | 0.09        | NaN          | JAK2,MT2A                                                                                                                                                                                                       |
| Oncostatin M Signaling                    | 2Gy 2h        | 0.39                 | 0.17        | 0.00         | ELK1,RRAS2,SOS1,TYK2                                                                                                                                                                                            |
| Oncostatin M Signaling                    | 2Gy 4h        | 0.71                 | 0.35        | -0.71        | ELK1,HRAS,IL6ST,JAK2,KRAS,MAP2K1,MT2A,RRAS2                                                                                                                                                                     |
| Opioid Signaling Pathway                  | 0.05Gy 2h     | 0.65                 | 0.02        | NaN          | CDKN1B,MYC                                                                                                                                                                                                      |
| Opioid Signaling Pathway                  | 0.05Gy 4h     | 0.68                 | 0.06        | 0.82         | FOS,GNAI2,GNG5,PRKCD,PRKCI,YES1                                                                                                                                                                                 |
| Opioid Signaling Pathway                  | 2Gy 2h        | 0.96                 | 0.19        | -0.24        | ATF4,CACNA1A,CAMK2G,CDC42,CDKN1B,ELK1,GNAO1,MAP2K5,MAPK7,MYC,PPP3CC,PPP3R1,PRKCE,RAC1,RGS12,RGS4,RRAS2,SOS1                                                                                                     |
| <b>Opioid Signaling Pathway</b>           | <b>2Gy 4h</b> | <b>2.20</b>          | <b>0.37</b> | <b>-0.85</b> | <b>ADCY8,AKT1,ATF2,ATF4,CACNA1C,CAMK1,CTNNB1,ELK1,FOS,GNAI2,GNAI3,GNG5,GSK3B,HRAS,ITPR2,KRAS,MAP2K1,NFKB1,NFKBIA,PPP3CA,PPP3CB,PPP3CC,PPP3R1,PRKAR2A,PRKCD,PRKCE,PRKCI,PRKD3,RAC3,RGS20,RGS4,RRAS2,SRF,YES1</b> |
| Osteoarthritis Pathway                    | 0.05Gy 2h     | 0.51                 | 0.02        | NaN          | HES1,PTGS2                                                                                                                                                                                                      |
| Osteoarthritis Pathway                    | 0.05Gy 4h     | 0.00                 | 0.02        | NaN          | TGFB1,TGFBR1                                                                                                                                                                                                    |
| Osteoarthritis Pathway                    | 2Gy 2h        | 0.78                 | 0.18        | 0.94         | ATF4,CASP3,CASP8,CEBPB,CXCL8,FGF2,GLI3,HES1,ITGA5,MTOR,NAMPT,PPARGC1A,PTGS2,PTHLH,RAC1,RUNX2,S1PR3,SDC4,SMAD3,SMAD7,TNFRSF1B                                                                                    |
| Osteoarthritis Pathway                    | 2Gy 4h        | 0.53                 | 0.28        | -0.93        | ATF2,ATF4,BMP2,BMPR2,CASP3,CTNNB1,DKK1,FGF2,FOXO3,FZD1,GLI3,GREM1,HIF1A,IL1R1,LEF1,NAMPT,NFKB1,PGF,PTCH1,PTGS2,RBPJ,SMAD2,SMAD3,SMAD4,SMAD6,SMAD7,SOX9,SP1,TCF4,TCF7,TGFB1,TGFBR1,TNFRSF1B                      |
| Ovarian Cancer Signaling                  | 0.05Gy 2h     | 0.28                 | 0.01        | NaN          | PTGS2                                                                                                                                                                                                           |
| Ovarian Cancer Signaling                  | 0.05Gy 4h     | 0.00                 | 0.01        | NaN          | BCL2                                                                                                                                                                                                            |
| Ovarian Cancer Signaling                  | 2Gy 2h        | 0.00                 | 0.10        | -1.34        | EDN1,FGF9,MSH6,MTOR,PIK3CB,PIK3CD,PTGS2,RRAS2                                                                                                                                                                   |
| <b>Ovarian Cancer Signaling</b>           | <b>2Gy 4h</b> | <b>2.17</b>          | <b>0.38</b> | <b>0.28</b>  | <b>ABL1,AKT1,AXIN1,BCL2,BRCA2,CD44,CDKN2A,CTNNB1,E2F1,EGFR,FZD1,GJA1,GSK3B,HRAS,KRAS,LEF1,MAP2K1,MSH6,PA2G4,PGF,PIK3CB,PIK3CD,PRKAR2A,PTEN,PTGS2,RRAS2,SRF,TCF4,TCF7,WNT5A</b>                                  |
| OX40 Signaling Pathway                    | 0.05Gy 4h     | 0.27                 | 0.06        | NaN          | BCL2                                                                                                                                                                                                            |
| OX40 Signaling Pathway                    | 2Gy 2h        | 0.00                 | 0.11        | NaN          | BCL2L1,MAPK8                                                                                                                                                                                                    |
| OX40 Signaling Pathway                    | 2Gy 4h        | 0.86                 | 0.39        | -1.63        | BCL2,BCL2L1,HLA-E,MAPK8,NFKB1,NFKBIA,TRAF3                                                                                                                                                                      |
| Oxidative Phosphorylation                 | 0.05Gy 4h     | 0.72                 | 0.11        | NaN          | NDUFS8,NDUFV3                                                                                                                                                                                                   |
| Oxidative Phosphorylation                 | 2Gy 4h        | 0.76                 | 0.37        | 1.89         | ATP5F1A,ATP5PF,NDUFS1,NDUFS3,NDUFS8,NDUFV1,NDUFV3                                                                                                                                                               |
| P2Y Purigenic Receptor Signaling Pathway  | 0.05Gy 2h     | 0.36                 | 0.02        | NaN          | MYC                                                                                                                                                                                                             |
| P2Y Purigenic Receptor Signaling Pathway  | 0.05Gy 4h     | 0.95                 | 0.08        | 0.45         | FOS,GNAI2,GNG5,PRKCD,PRKCI                                                                                                                                                                                      |
| P2Y Purigenic Receptor Signaling Pathway  | 2Gy 2h        | 0.00                 | 0.10        | -1.63        | ATF4,MYC,PIK3CB,PIK3CD,PRKCE,RRAS2                                                                                                                                                                              |
| P2Y Purigenic Receptor Signaling Pathway  | 2Gy 4h        | 0.98                 | 0.33        | 0.45         | ADCY8,AKT1,ATF2,ATF4,FOS,GNAI2,GNAI3,GNG5,HRAS,KRAS,MAP2K1,NFKB1,PIK3CB,PIK3CD,PRKAR2A,PRKCD,PRKCE,PRKCI,PRKD3,RRAS2                                                                                            |
| p38 MAPK Signaling                        | 0.05Gy 2h     | 0.47                 | 0.02        | NaN          | MYC                                                                                                                                                                                                             |
| p38 MAPK Signaling                        | 0.05Gy 4h     | 0.55                 | 0.07        | NaN          | MAX,TGFB1,TGFBR1                                                                                                                                                                                                |
| p38 MAPK Signaling                        | 2Gy 2h        | 0.81                 | 0.21        | 0.00         | ATF4,CDC25B,DUSP1,ELK1,FAS,MAX,MEF2D,MYC,TNFRSF1B                                                                                                                                                               |
| p38 MAPK Signaling                        | 2Gy 4h        | 0.72                 | 0.32        | -0.83        | ATF2,ATF4,CDC25B,DDIT3,DUSP1,ELK1,FAS,IL1R1,MAP3K7,MAX,SRF,TGFB1,TGFBR1,TNFRSF1B                                                                                                                                |
| p53 Signaling                             | 0.05Gy 2h     | 0.97                 | 0.03        | NaN          | BBC3,SNAI2                                                                                                                                                                                                      |

| Ingenuity Canonical Pathways                    | Model            | -log(p-value) | Ratio       | z-score      | Molecules                                                                                                                                                                                     |
|-------------------------------------------------|------------------|---------------|-------------|--------------|-----------------------------------------------------------------------------------------------------------------------------------------------------------------------------------------------|
| p53 Signaling                                   | 0.05Gy 4h        | 0.97          | 0.08        | 0.45         | BBC3,BCL2,CDKN1A,GNL3,MDM2                                                                                                                                                                    |
| <b>p53 Signaling</b>                            | <b>2Gy 2h</b>    | <b>1.79</b>   | <b>0.25</b> | <b>1.94</b>  | <b>BBC3,BCL2L1,CDKN1A,CHEK1,FAS,GNL3,MAPK8,MDM2,PCNA,PIK3CB,PIK3CD,SNAI2,TNFRSF10B,TP53BP2,TP53INP1</b>                                                                                       |
| <b>p53 Signaling</b>                            | <b>2Gy 4h</b>    | <b>3.27</b>   | <b>0.45</b> | <b>0.82</b>  | <b>AKT1,ATM,BBC3,BCL2,BCL2L1,CDKN1A,CDKN2A,CTNNB1,E2F1,FAS,GADD45A,GNL3,GSK3B,HI F1A,MAPK8,MDM2,PCNA,PIK3CB,PIK3CD,PLAGL1,PTEN,SNAI2,TNFRSF10A,TNFRSF10B,TP53BP 2,TP53INP1,TP63</b>           |
| p70S6K Signaling                                | 0.05Gy 4h        | 0.35          | 0.05        | NaN          | GNAI2,PRKCD,PRKCI                                                                                                                                                                             |
| <b>p70S6K Signaling</b>                         | <b>2Gy 2h</b>    | <b>0.74</b>   | <b>0.19</b> | <b>-2.71</b> | <b>IL4R,IRS1,MTOR,PDPK1,PIK3CB,PIK3CD,PLD1,PPP2CA,PRKCE,RRAS2,SOS1</b>                                                                                                                        |
| p70S6K Signaling                                | 2Gy 4h           | 0.94          | 0.33        | 0.23         | AKT1,BCAP31,EGFR,GNAI2,GNAI3,HRAS,IL4R,KRAS,MAP2K1,PIK3CB,PIK3CD,PLD1,PPP2CA,PRK CD,PRKCE,PRKCI,PRKD3,RRAS2,SRC                                                                               |
| <b>PAK Signaling</b>                            | <b>2Gy 2h</b>    | <b>2.43</b>   | <b>0.31</b> | <b>0.28</b>  | <b>CASP3,CDC42,EPHB3,ITGA5,LIMK2,MAPK8,NCK1,PDGFA,PIK3CB,PIK3CD,RAC1,RRAS2,SOS1</b>                                                                                                           |
| PAK Signaling                                   | 2Gy 4h           | 0.45          | 0.29        | -0.91        | CASP3,CFL1,HRAS,KRAS,LIMK2,MAP2K1,MAPK8,PDGFRA,PIK3CB,PIK3CD,PTK2B,RRAS2                                                                                                                      |
| Pancreatic Adenocarcinoma Signaling             | 0.05Gy 2h        | 0.85          | 0.03        | NaN          | CDKN1B,PTGS2                                                                                                                                                                                  |
| <b>Pancreatic Adenocarcinoma Signaling</b>      | <b>0.05Gy 4h</b> | <b>2.04</b>   | <b>0.11</b> | <b>-1.00</b> | <b>BCL2,CDKN1A,E2F4,E2F5,JAK2,MDM2,TGFB1,TGFBR1</b>                                                                                                                                           |
| <b>Pancreatic Adenocarcinoma Signaling</b>      | <b>2Gy 2h</b>    | <b>1.78</b>   | <b>0.24</b> | <b>-0.54</b> | <b>BCL2L1,CCNE1,CDC42,CDKN1A,CDKN1B,ELK1,HMOX1,MAPK8,MDM2,NAPEPLD,PIK3CB,PIK3C D,PLD1,PTGS2,RAC1,SMAD3,TYK2</b>                                                                               |
| <b>Pancreatic Adenocarcinoma Signaling</b>      | <b>2Gy 4h</b>    | <b>3.39</b>   | <b>0.44</b> | <b>-0.69</b> | <b>ABL1,AKT1,BCL2,BCL2L1,BRCA2,CCNE1,CDKN1A,CDKN2A,CDKN2B,E2F1,E2F5,EGFR,ELK1,HM OX1,JAK2,KRAS,MAP2K1,MAPK8,MDM2,NFKB1,PA2G4,PGF,PIK3CB,PIK3CD,PLD1,PTGS2,SMAD 2,SMAD3,SMAD4,TGFB1,TGFBR1</b> |
| <b>Parkinson's Signaling</b>                    | <b>2Gy 2h</b>    | <b>1.70</b>   | <b>1.00</b> | <b>NaN</b>   | <b>CASP3,MAPK8</b>                                                                                                                                                                            |
| Parkinson's Signaling                           | 2Gy 4h           | 1.20          | 1.00        | NaN          | CASP3,MAPK8                                                                                                                                                                                   |
| Paxillin Signaling                              | 0.05Gy 4h        | 0.25          | 0.05        | NaN          | ACTA2,ARF6                                                                                                                                                                                    |
| <b>Paxillin Signaling</b>                       | <b>2Gy 2h</b>    | <b>1.43</b>   | <b>0.25</b> | <b>-0.30</b> | <b>ACTA2,ARF6,CDC42,ITGA5,MAPK8,NCK1,PIK3CB,PIK3CD,RAC1,RRAS2,SOS1</b>                                                                                                                        |
| Paxillin Signaling                              | 2Gy 4h           | 0.72          | 0.32        | -0.83        | ACTA2,ARF1,ARF6,BCAR1,CRK,HRAS,ITGB8,KRAS,MAPK8,PIK3CB,PIK3CD,PTK2B,RRAS2,SRC                                                                                                                 |
| PCP pathway                                     | 0.05Gy 4h        | 0.00          | 0.04        | NaN          | RHOA                                                                                                                                                                                          |
| PCP pathway                                     | 2Gy 2h           | 0.52          | 0.19        | 1.34         | EFNB1,JUNB,JUND,MAPK8,RAC1                                                                                                                                                                    |
| PCP pathway                                     | 2Gy 4h           | 1.04          | 0.39        | -0.63        | ATF2,EFNB1,FZD1,JUNB,MAPK8,PFN1,RHOA,ROCK1,ROCK2,WNT5A                                                                                                                                        |
| PD-1, PD-L1 cancer immunotherapy pathway        | 0.05Gy 2h        | 1.06          | 0.04        | NaN          | CDKN1B,IL12A                                                                                                                                                                                  |
| PD-1, PD-L1 cancer immunotherapy pathway        | 0.05Gy 4h        | 0.00          | 0.04        | NaN          | JAK2,TGFB1                                                                                                                                                                                    |
| PD-1, PD-L1 cancer immunotherapy pathway        | 2Gy 2h           | 0.49          | 0.17        | 0.33         | BCL2L1,CD274,CDKN1B,ELK1,PIK3CB,PIK3CD,SMAD3,TNFRSF1B,TYK2                                                                                                                                    |
| <b>PD-1, PD-L1 cancer immunotherapy pathway</b> | <b>2Gy 4h</b>    | <b>1.58</b>   | <b>0.38</b> | <b>-1.00</b> | <b>AKT1,BCL2L1,CSNK2B,ELK1,GSK3B,HLA-E,IFNGR1,IL12A,JAK2,LATS1,NGFR,PDCD1LG2,PIK3CB,PIK3CD,PTEN,SMAD3,TGFB1,TNFRSF11 B,TNFRSF1B,YAP1</b>                                                      |
| PDGF Signaling                                  | 0.05Gy 2h        | 0.47          | 0.02        | NaN          | MYC                                                                                                                                                                                           |
| PDGF Signaling                                  | 0.05Gy 4h        | 0.25          | 0.05        | NaN          | FOS,JAK2                                                                                                                                                                                      |
| PDGF Signaling                                  | 2Gy 2h           | 0.81          | 0.21        | -0.33        | ELK1,MAPK8,MYC,PDGFA,PIK3CB,PIK3CD,RRAS2,SOS1,TYK2                                                                                                                                            |
| <b>PDGF Signaling</b>                           | <b>2Gy 4h</b>    | <b>1.84</b>   | <b>0.41</b> | <b>-0.94</b> | <b>ABL1,CRK,CSNK2B,EIF2AK2,ELK1,FOS,HRAS,JAK2,KRAS,MAP2K1,MAP3K1,MAPK8,PDGFRA,PI K3CB,PIK3CD,RRAS2,SRF,SRF</b>                                                                                |
| PEDF Signaling                                  | 0.05Gy 4h        | 0.27          | 0.05        | NaN          | BCL2,RHOA                                                                                                                                                                                     |
| <b>PEDF Signaling</b>                           | <b>2Gy 2h</b>    | <b>1.98</b>   | <b>0.29</b> | <b>-0.58</b> | <b>BCL2L1,BDNF,CASP8,CFLAR,ELK1,FAS,IKBKB,IKBKE,PIK3CB,PIK3CD,RAC1,RRAS2</b>                                                                                                                  |
| <b>PEDF Signaling</b>                           | <b>2Gy 4h</b>    | <b>2.93</b>   | <b>0.48</b> | <b>0.23</b>  | <b>AKT1,BCL2,BCL2L1,CFLAR,ELK1,FAS,GDNF,HRAS,KRAS,NFKB1,NFKBIA,PIK3CB,PIK3CD,RHOA ,ROCK1,ROCK2,RRAS2,SRF,TCF4,TCF7</b>                                                                        |
| <b>Pentose Phosphate Pathway</b>                | <b>0.05Gy 4h</b> | <b>1.37</b>   | <b>1.00</b> | <b>NaN</b>   | <b>G6PD</b>                                                                                                                                                                                   |

| Ingenuity Canonical Pathways                        | Model            | <b>-log(p-value)</b> | Ratio       | z-score      | Molecules                                                                                                                                                                         |
|-----------------------------------------------------|------------------|----------------------|-------------|--------------|-----------------------------------------------------------------------------------------------------------------------------------------------------------------------------------|
| Pentose Phosphate Pathway                           | 2Gy 4h           | 0.60                 | 1.00        | NaN          | G6PD                                                                                                                                                                              |
| <b>Pentose Phosphate Pathway (Oxidative Branch)</b> | <b>0.05Gy 4h</b> | <b>1.37</b>          | <b>1.00</b> | <b>NaN</b>   | <b>G6PD</b>                                                                                                                                                                       |
| Pentose Phosphate Pathway (Oxidative Branch)        | 2Gy 4h           | 0.60                 | 1.00        | NaN          | G6PD                                                                                                                                                                              |
| <b>PFKFB4 Signaling Pathway</b>                     | <b>0.05Gy 4h</b> | <b>1.31</b>          | <b>0.15</b> | <b>NaN</b>   | <b>GPI,HK2,TGFB1</b>                                                                                                                                                              |
| PFKFB4 Signaling Pathway                            | 2Gy 2h           | 0.51                 | 0.20        | 0.00         | ATF4,FGF2,HK2,MAP2K5                                                                                                                                                              |
| PFKFB4 Signaling Pathway                            | 2Gy 4h           | 0.99                 | 0.40        | 0.00         | ATF2,ATF4,FGF2,GPI,HK2,MAP2K1,PRKAR2A,TGFB1                                                                                                                                       |
| Phagosome Formation                                 | 0.05Gy 4h        | 1.07                 | 0.09        | NaN          | MARCKS,PRKCD,PRKCI,RHOA,RHOG                                                                                                                                                      |
| Phagosome Formation                                 | 2Gy 2h           | 0.59                 | 0.18        | NaN          | CDC42,ITGA5,MARCKS,PIK3CB,PIK3CD,PRKCE,RAC1,RHOB,RHOQ,RND3                                                                                                                        |
| Phagosome Formation                                 | 2Gy 4h           | 0.00                 | 0.16        | NaN          | MARCKS,PIK3CB,PIK3CD,PRKCD,PRKCE,PRKCI,PRKD3,RAC3,RHOA                                                                                                                            |
| Phagosome Maturation                                | 0.05Gy 4h        | 0.34                 | 0.06        | NaN          | ATP6V1B2,TAP1                                                                                                                                                                     |
| Phagosome Maturation                                | 2Gy 2h           | 0.00                 | 0.14        | NaN          | ATP6V0A1,PRDX1,STX16,TUBB2A,TUBB4B                                                                                                                                                |
| Phagosome Maturation                                | 2Gy 4h           | 0.56                 | 0.31        | NaN          | ATP6V0A1,ATP6V1B2,ATP6V1E1,CALR,CTSD,HLA-E,NOX4,PRDX1,PRDX6,TAP1,TUBB2A                                                                                                           |
| Phosphatidylcholine Biosynthesis I                  | 2Gy 2h           | 0.34                 | 0.25        | NaN          | CHPT1                                                                                                                                                                             |
| Phospholipase C Signaling                           | 0.05Gy 4h        | 0.97                 | 0.07        | 1.13         | GNG5,MARCKS,NFATC1,PRKCD,PRKCI,RHOA,RHOG                                                                                                                                          |
| <b>Phospholipase C Signaling</b>                    | <b>2Gy 2h</b>    | <b>1.38</b>          | <b>0.21</b> | <b>-1.50</b> | <b>ATF4,CDC42,HDAC6,HMOX1,ITGA5,MARCKS,MEF2D,NAPEPLD,NFATC1,NFATC4,PLD1,PPP3CC,PPP3R1,PRKCE,RAC1,RHOB,RHOQ,RND3,RRAS2,SOS1</b>                                                    |
| Phospholipase C Signaling                           | 2Gy 4h           | 0.70                 | 0.29        | -0.43        | ADCY8,ARHGEF3,ATF2,ATF4,GNG5,HMOX1,HRAS,ITPR2,KRAS,MAP2K1,MARCKS,NFAT5,NFATC1,NFKB1,PEBP1,PLD1,PPP3CA,PPP3CB,PPP3CC,PPP3R1,PRKCD,PRKCE,PRKCI,PRKD3,RAC3,RHOA,RRAS2,SRC            |
| Phospholipases                                      | 2Gy 2h           | 0.56                 | 0.21        | 0.00         | HMOX1,NAPEPLD,PLD1,PNPLA8                                                                                                                                                         |
| Phospholipases                                      | 2Gy 4h           | 0.00                 | 0.16        | NaN          | HMOX1,PLD1,PNPLA8                                                                                                                                                                 |
| Phototransduction Pathway                           | 2Gy 4h           | 0.00                 | 0.07        | NaN          | PRKAR2A                                                                                                                                                                           |
| PI3K Signaling in B Lymphocytes                     | 0.05Gy 4h        | 0.50                 | 0.06        | 1.00         | FOS,NFATC1,PRKCI,VAV2                                                                                                                                                             |
| <b>PI3K Signaling in B Lymphocytes</b>              | <b>2Gy 2h</b>    | <b>2.03</b>          | <b>0.25</b> | <b>-1.81</b> | <b>ATF4,CAMK2G,ELK1,IKBKB,IKBKE,IL4R,IRS1,IRS2,NFATC1,NFATC4,PDPK1,PIK3CB,PIK3CD,PPP3CC,PPP3R1,RAC1,RRAS2</b>                                                                     |
| <b>PI3K Signaling in B Lymphocytes</b>              | <b>2Gy 4h</b>    | <b>2.41</b>          | <b>0.40</b> | <b>-1.57</b> | <b>ABL1,AKT1,ATF2,ATF4,ATF6,ELK1,FOS,FOXO3,HRAS,IL4R,ITPR2,KRAS,MAP2K1,NFAT5,NFATC1,NFKB1,NFKBIA,PIK3CB,PIK3CD,PPP3CA,PPP3CB,PPP3CC,PPP3R1,PRKCI,PTEN,RRAS2,VAV2</b>              |
| PI3K/AKT Signaling                                  | 0.05Gy 2h        | 0.67                 | 0.02        | NaN          | CDKN1B,PTGS2                                                                                                                                                                      |
| PI3K/AKT Signaling                                  | 0.05Gy 4h        | 0.26                 | 0.04        | -1.00        | BCL2,CDKN1A,JAK2,MDM2                                                                                                                                                             |
| <b>PI3K/AKT Signaling</b>                           | <b>2Gy 2h</b>    | <b>1.06</b>          | <b>0.20</b> | <b>-2.00</b> | <b>BCL2L1,CDKN1A,CDKN1B,IKBKB,IKBKE,IL4R,IL6R,ITGA5,MDM2,MTOR,PDPK1,PIK3CB,PIK3CD,PPP2CA,PTGS2,RRAS2,SOS1,TYK2</b>                                                                |
| PI3K/AKT Signaling                                  | 2Gy 4h           | 1.03                 | 0.32        | 0.45         | AKT1,BCL2,BCL2L1,CDKN1A,CTNNB1,FOXO3,GHR,GSK3B,HRAS,HSP90AB1,IL17RA,IL18R1,IL1R1,IL22RA1,IL4R,IL6R,IL6ST,JAK2,KRAS,MAP2K1,MDM2,NFKB1,NFKBIA,PIK3CB,PIK3CD,PPP2CA,PTEN,PTGS2,RRAS2 |
| PKĈ <sub>̂</sub> Signaling in T Lymphocytes        | 0.05Gy 4h        | 0.39                 | 0.05        | NaN          | FOS,NFATC1,VAV2                                                                                                                                                                   |
| <b>PKĈ<sub>̂</sub> Signaling in T Lymphocytes</b>  | <b>2Gy 2h</b>    | <b>1.77</b>          | <b>0.26</b> | <b>-1.39</b> | <b>CACNA1A,CAMK2G,IKBKB,IKBKE,MAPK8,NFATC1,NFATC4,PIK3CB,PIK3CD,PPP3CC,PPP3R1,RAC1,RRAS2,SOS1</b>                                                                                 |
| <b>PKĈ<sub>̂</sub> Signaling in T Lymphocytes</b>  | <b>2Gy 4h</b>    | <b>1.40</b>          | <b>0.36</b> | <b>-1.15</b> | <b>CACNA1C,FOS,HRAS,KRAS,MAP3K1,MAP3K7,MAPK8,NFAT5,NFATC1,NFKB1,NFKBIA,PIK3CB,PIK3CD,PPP3CA,PPP3CB,PPP3CC,PPP3R1,RAC3,RRAS2,VAV2</b>                                              |
| Polyamine Regulation in Colon Cancer                | 0.05Gy 2h        | 1.09                 | 0.11        | NaN          | MYC                                                                                                                                                                               |
| Polyamine Regulation in Colon Cancer                | 0.05Gy 4h        | 0.49                 | 0.11        | NaN          | MAX                                                                                                                                                                               |
| <b>Polyamine Regulation in Colon Cancer</b>         | <b>2Gy 2h</b>    | <b>1.57</b>          | <b>0.44</b> | <b>NaN</b>   | <b>MAX,MXD1,MYC,SAT1</b>                                                                                                                                                          |
| <b>Polyamine Regulation in Colon Cancer</b>         | <b>2Gy 4h</b>    | <b>1.31</b>          | <b>0.56</b> | <b>NaN</b>   | <b>CTNNB1,KRAS,MAX,SAT1,TCF4</b>                                                                                                                                                  |
| PPAR Signaling                                      | 0.05Gy 2h        | 0.36                 | 0.02        | NaN          | PTGS2                                                                                                                                                                             |

| Inguenuity Canonical Pathways                                         | Model            | -log(p-value) | Ratio       | z-score      | Molecules                                                                                                                                                                                                                                                |
|-----------------------------------------------------------------------|------------------|---------------|-------------|--------------|----------------------------------------------------------------------------------------------------------------------------------------------------------------------------------------------------------------------------------------------------------|
| PPAR Signaling                                                        | 0.05Gy 4h        | 0.00          | 0.02        | NaN          | FOS                                                                                                                                                                                                                                                      |
| PPAR Signaling                                                        | 2Gy 2h           | 0.45          | 0.16        | 0.00         | IKBKB,IKBKE,NCOR2,PDGFA,PPARGC1A,PTGS2,RRAS2,RXRA,SOS1,TNFRSF1B                                                                                                                                                                                          |
| PPAR Signaling                                                        | 2Gy 4h           | 0.60          | 0.30        | -0.47        | FOS,HRAS,HSP90AB1,IL1R1,KRAS,MAP2K1,MAP3K7,MAP4K4,NFKB1,NFKBIA,NGFR,NR1H3,PDG FRA,PPARA,PTGS2,RRAS2,TNFRSF11B,TNFRSF1B                                                                                                                                   |
| PPAR $\hat{\pm}$ /RXR $\hat{\pm}$ Activation                          | 0.05Gy 2h        | 0.65          | 0.02        | NaN          | BCL3,IL6                                                                                                                                                                                                                                                 |
| PPAR $\hat{\pm}$ /RXR $\hat{\pm}$ Activation                          | 0.05Gy 4h        | 0.00          | 0.03        | NaN          | JAK2,TGFB1,TGFBR1                                                                                                                                                                                                                                        |
| PPAR $\hat{\pm}$ /RXR $\hat{\pm}$ Activation                          | 2Gy 2h           | 0.00          | 0.14        | 1.39         | ACVR2A,BCL3,IKBKB,IKBKE,IL6,IRS1,MAPK8,NCOR2,PPARGC1A,RRAS2,RXRA,SMAD3,SOS1 ACVR1,ACVR1B,ACVR2A,ADCY8,ADIPOR2,BMPR2,GHR,HRAS,HSP90AB1,IL1R1,JAK2,KRAS,MAP 2K1,MAP3K7,MAP4K4,MAPK8,NFKB1,NFKBIA,NR2C2,PPARA,PRKAR2A,RRAS2,SMAD2,SMAD3,S MAD4,TGFB1,TGFBR1 |
| PPAR $\hat{\pm}$ /RXR $\hat{\pm}$ Activation                          | 2Gy 4h           | 0.60          | 0.28        | 1.96         |                                                                                                                                                                                                                                                          |
| Pregnenolone Biosynthesis                                             | 2Gy 4h           | 0.00          | 0.17        | NaN          | CYP7B1                                                                                                                                                                                                                                                   |
| Primary Immunodeficiency Signaling                                    | 0.05Gy 4h        | 0.37          | 0.08        | NaN          | TAP1                                                                                                                                                                                                                                                     |
| Primary Immunodeficiency Signaling                                    | 2Gy 4h           | 0.00          | 0.15        | NaN          | TAP1,UNG                                                                                                                                                                                                                                                 |
| Production of Nitric Oxide and Reactive Oxygen Species in Macrophages | 0.05Gy 4h        | 0.78          | 0.07        | 0.82         | FOS,JAK2,PRKCD,PRKCI,RHOA,RHOG                                                                                                                                                                                                                           |
| Production of Nitric Oxide and Reactive Oxygen Species in Macrophages | 2Gy 2h           | 0.60          | 0.17        | -1.60        | APOE,CDC42,IKBKB,IKBKE,MAPK8,PIK3CB,PIK3CD,PPP2CA,PRKCE,RAC1,RHOB,RHOQ,RND3,T NFRSF1B,TYK2                                                                                                                                                               |
| Production of Nitric Oxide and Reactive Oxygen Species in Macrophages | 2Gy 4h           | 0.46          | 0.27        | -0.63        | AKT1,FOS,IFNGR1,JAK2,MAP2K1,MAP3K1,MAP3K7,MAPK8,NFKB1,NFKBIA,NGFR,PIK3CB,PIK3CD ,PPARA,PPP1CA,PPP2CA,PRKCD,PRKCE,PRKCI,PRKD3,RAC3,RHOA,TNFRSF11B,TNFRSF1B                                                                                                |
| Prolactin Signaling                                                   | 0.05Gy 2h        | 1.12          | 0.04        | NaN          | MYC,SOCS3                                                                                                                                                                                                                                                |
| <b>Prolactin Signaling</b>                                            | <b>0.05Gy 4h</b> | <b>1.80</b>   | <b>0.12</b> | <b>0.45</b>  | <b>FOS,JAK2,NR3C1,PRKCD,PRKCI,SOCS6</b>                                                                                                                                                                                                                  |
| <b>Prolactin Signaling</b>                                            | <b>2Gy 2h</b>    | <b>2.23</b>   | <b>0.29</b> | <b>-1.94</b> | <b>CEBPB,IRS1,MYC,PDPK1,PIK3CB,PIK3CD,PRKCE,RRAS2,SOCS1,SOCS2,SOCS3,SOCS5,SOCS6, SOS1</b>                                                                                                                                                                |
| <b>Prolactin Signaling</b>                                            | <b>2Gy 4h</b>    | <b>2.35</b>   | <b>0.43</b> | <b>0.00</b>  | <b>FOS,HRAS,JAK2,KRAS,MAP2K1,NR3C1,PIK3CB,PIK3CD,PRKCD,PRKCE,PRKCI,PRKD3,PRLR,RR AS2,SOCS2,SOCS3,SOCS5,SOCS6,SOCS7,SP1,TCF7</b>                                                                                                                          |
| Proline Biosynthesis I                                                | 2Gy 4h           | 1.20          | 1.00        | NaN          | ALDH18A1,PYCR1                                                                                                                                                                                                                                           |
| Proline Biosynthesis II (from Arginine)                               | 2Gy 2h           | 0.44          | 0.33        | NaN          | OAT                                                                                                                                                                                                                                                      |
| Proline Biosynthesis II (from Arginine)                               | 2Gy 4h           | 0.80          | 0.67        | NaN          | OAT,PYCR1                                                                                                                                                                                                                                                |
| Prostanoid Biosynthesis                                               | 0.05Gy 2h        | 1.26          | 0.17        | NaN          | PTGS2                                                                                                                                                                                                                                                    |
| Prostanoid Biosynthesis                                               | 2Gy 2h           | 0.70          | 0.33        | NaN          | PTGES3,PTGS2                                                                                                                                                                                                                                             |
| <b>Prostanoid Biosynthesis</b>                                        | <b>2Gy 4h</b>    | <b>1.42</b>   | <b>0.67</b> | <b>2.00</b>  | <b>PTGES,PTGES2,PTGES3,PTGS2</b>                                                                                                                                                                                                                         |
| Prostate Cancer Signaling                                             | 0.05Gy 2h        | 0.41          | 0.02        | NaN          | CDKN1B                                                                                                                                                                                                                                                   |
| Prostate Cancer Signaling                                             | 0.05Gy 4h        | 0.42          | 0.06        | NaN          | BCL2,CDKN1A,MDM2                                                                                                                                                                                                                                         |
| Prostate Cancer Signaling                                             | 2Gy 2h           | 0.98          | 0.21        | NaN          | ATF4,CCNE1,CDKN1A,CDKN1B,MDM2,MTOR,PDPK1,PIK3CB,PIK3CD,RRAS2,SOS1                                                                                                                                                                                        |
| <b>Prostate Cancer Signaling</b>                                      | <b>2Gy 4h</b>    | <b>3.62</b>   | <b>0.48</b> | <b>NaN</b>   | <b>ABL1,AKT1,ATF2,ATF4,BCL2,CCNE1,CCNE2,CDKN1A,CTNNB1,E2F1,GSK3B,GSTP1,HRAS,HSP90 AB1,KRAS,LEF1,MAP2K1,MDM2,NFKB1,NFKBIA,PA2G4,PIK3CB,PIK3CD,PTEN,RRAS2</b>                                                                                              |
| Protein Kinase A Signaling                                            | 0.05Gy 2h        | 0.00          | 0.01        | NaN          | PTGS2                                                                                                                                                                                                                                                    |
| <b>Protein Kinase A Signaling</b>                                     | <b>0.05Gy 4h</b> | <b>1.31</b>   | <b>0.08</b> | <b>0.63</b>  | <b>CDC25C,GNAI2,GNG5,NFATC1,PRKCD,PRKCI,PTPN13,RHOA,TGFB1,TGFBR1</b>                                                                                                                                                                                     |
| Protein Kinase A Signaling                                            | 2Gy 2h           | 0.30          | 0.14        | -1.89        | ATF4,CAMK2G,CDC25B,DUSP1,DUSP6,ELK1,GLI3,LIPE,NAPEPLD,NFATC1,NFATC4,PDE4D,PPP3 CC,PPP3R1,PRKCE,PTGS2,PTP4A1,PTPN2,SMAD3                                                                                                                                  |

| Ingenuity Canonical Pathways                           | Model            | $-\log(p\text{-value})$ | Ratio       | z-score      | Molecules                                                                                                                                                                                                                                                                                                                                     |
|--------------------------------------------------------|------------------|-------------------------|-------------|--------------|-----------------------------------------------------------------------------------------------------------------------------------------------------------------------------------------------------------------------------------------------------------------------------------------------------------------------------------------------|
| <b>Protein Kinase A Signaling</b>                      | <b>2Gy 4h</b>    | <b>4.53</b>             | <b>0.41</b> | <b>-0.30</b> | <b>ADCY8,APEX1,ATF2,ATF4,CDC25B,CREM,CTNNB1,DUSP1,DUSP6,ELK1,GLI3,GNAI2,GNAI3,GNG5,GSK3B,ITPR2,LEF1,LIPE,MAP2K1,MAP3K1,NFAT5,NFATC1,NFKB1,NFKBIA,NGFR,PPP1CA,PPP3CA,PPP3CB,PPP3CC,PPP3R1,PRKAR2A,PRKCD,PRKCE,PRKCI,PRKD3,PTCH1,PTEN,PTGS2,PTK2B,PTP4A1,PTPN13,PTPN9,PTPRE,PTPRK,PTPRS,RHOA,ROCK1,ROCK2,SMAD3,SMAD4,TCF4,TCF7,TGFB1,TGFBR1</b> |
| <b>Protein Ubiquitination Pathway</b>                  | <b>0.05Gy 4h</b> | <b>2.00</b>             | <b>0.16</b> | <b>NaN</b>   | <b>MDM2,PSMB9,TAP1,UBE2I,USP53</b>                                                                                                                                                                                                                                                                                                            |
| Protein Ubiquitination Pathway                         | 2Gy 2h           | 0.54                    | 0.19        | NaN          | BIRC2,HSPA4L,HSPA9,MDM2,UBE2E1,USP2                                                                                                                                                                                                                                                                                                           |
| <b>Protein Ubiquitination Pathway</b>                  | <b>2Gy 4h</b>    | <b>1.43</b>             | <b>0.41</b> | <b>NaN</b>   | <b>HLA-E,HSP90AB1,HSPA4L,HSPA6,HSPA8,MDM2,PSMB9,STUB1,TAP1,UBC,UBE2I,USP53,XIAP</b>                                                                                                                                                                                                                                                           |
| PTEN Signaling                                         | 0.05Gy 2h        | 0.28                    | 0.01        | NaN          | CDKN1B                                                                                                                                                                                                                                                                                                                                        |
| PTEN Signaling                                         | 0.05Gy 4h        | 0.00                    | 0.04        | NaN          | BCL2,CDKN1A,TGFBR1                                                                                                                                                                                                                                                                                                                            |
| PTEN Signaling                                         | 2Gy 2h           | 0.94                    | 0.20        | 1.29         | BCL2L1,BCL2L11,CASP3,CDC42,CDKN1A,CDKN1B,IKBKB,IKBKE,ITGA5,PDPK1,PIK3CB,PIK3CD,RAC1,RRAS2,SOS1                                                                                                                                                                                                                                                |
| PTEN Signaling                                         | 2Gy 4h           | 1.07                    | 0.33        | 1.00         | AKT1,BCAR1,BCL2,BCL2L1,BMPR2,CASP3,CDKN1A,CSNK2B,EGFR,FLT1,FOXO3,GHR,GSK3B,HRAS,KRAS,MAP2K1,NFKB1,NGFR,PDGFRA,PIK3CB,PIK3CD,PTEN,RAC3,RRAS2,TGFBR1                                                                                                                                                                                            |
| Putrescine Degradation III                             | 2Gy 2h           | 0.00                    | 0.13        | NaN          | SAT1                                                                                                                                                                                                                                                                                                                                          |
| Putrescine Degradation III                             | 2Gy 4h           | 0.00                    | 0.13        | NaN          | SAT1                                                                                                                                                                                                                                                                                                                                          |
| PXR/RXR Activation                                     | 0.05Gy 2h        | 0.42                    | 0.02        | NaN          | IL6                                                                                                                                                                                                                                                                                                                                           |
| PXR/RXR Activation                                     | 0.05Gy 4h        | 0.00                    | 0.02        | NaN          | NR3C1                                                                                                                                                                                                                                                                                                                                         |
| PXR/RXR Activation                                     | 2Gy 2h           | 0.00                    | 0.08        | NaN          | ALAS1,IL6,PPARGC1A,RXRA                                                                                                                                                                                                                                                                                                                       |
| PXR/RXR Activation                                     | 2Gy 4h           | 0.00                    | 0.14        | NaN          | AKT1,CES2,CPT1A,FOXO3,NR3C1,PPARA,PRKAR2A                                                                                                                                                                                                                                                                                                     |
| Pyridoxal 5'-phosphate Salvage Pathway                 | 0.05Gy 4h        | 0.21                    | 0.05        | NaN          | PRKCD                                                                                                                                                                                                                                                                                                                                         |
| Pyridoxal 5'-phosphate Salvage Pathway                 | 2Gy 2h           | 1.11                    | 0.27        | -0.82        | ACVR2A,LIMK2,MAPK7,MAPK8,PRKCE,SGK1                                                                                                                                                                                                                                                                                                           |
| Pyridoxal 5'-phosphate Salvage Pathway                 | 2Gy 4h           | 0.52                    | 0.32        | 0.38         | ACVR2A,EIF2AK2,LIMK2,MAP2K1,MAPK8,PRKCD,PRKCE                                                                                                                                                                                                                                                                                                 |
| Pyrimidine Deoxyribonucleotides De Novo Biosynthesis I | 0.05Gy 4h        | 1.08                    | 0.50        | NaN          | NME2                                                                                                                                                                                                                                                                                                                                          |
| Pyrimidine Deoxyribonucleotides De Novo Biosynthesis I | 2Gy 4h           | 0.36                    | 0.50        | NaN          | NME2                                                                                                                                                                                                                                                                                                                                          |
| Pyrimidine Ribonucleotides De Novo Biosynthesis        | 0.05Gy 4h        | 0.64                    | 0.17        | NaN          | NME2                                                                                                                                                                                                                                                                                                                                          |
| Pyrimidine Ribonucleotides De Novo Biosynthesis        | 2Gy 2h           | 0.22                    | 0.17        | NaN          | CAD                                                                                                                                                                                                                                                                                                                                           |
| Pyrimidine Ribonucleotides De Novo Biosynthesis        | 2Gy 4h           | 0.00                    | 0.17        | NaN          | NME2                                                                                                                                                                                                                                                                                                                                          |
| Pyrimidine Ribonucleotides Interconversion             | 0.05Gy 4h        | 0.71                    | 0.20        | NaN          | NME2                                                                                                                                                                                                                                                                                                                                          |
| Pyrimidine Ribonucleotides Interconversion             | 2Gy 4h           | 0.00                    | 0.20        | NaN          | NME2                                                                                                                                                                                                                                                                                                                                          |
| Rac Signaling                                          | 0.05Gy 4h        | 0.24                    | 0.04        | NaN          | PRKCI,RHOA                                                                                                                                                                                                                                                                                                                                    |
| Rac Signaling                                          | 2Gy 2h           | 1.04                    | 0.22        | 0.00         | CDC42,ELK1,ITGA5,LIMK2,MAPK8,PIK3CB,PIK3CD,PLD1,RAC1,RRAS2                                                                                                                                                                                                                                                                                    |
| <b>Rac Signaling</b>                                   | <b>2Gy 4h</b>    | <b>2.09</b>             | <b>0.42</b> | <b>-1.41</b> | <b>CD44,CDK5R1,CFL1,ELK1,HRAS,KRAS,LIMK2,MAP2K1,MAP3K1,MAPK8,NFKB1,NOX4,PIK3CB,PIK3CD,PLD1,PRKCI,PTK2B,RHOA,RRAS2</b>                                                                                                                                                                                                                         |
| RAN Signaling                                          | 2Gy 2h           | 0.27                    | 0.20        | NaN          | KPNA4                                                                                                                                                                                                                                                                                                                                         |
| RAN Signaling                                          | 2Gy 4h           | 0.43                    | 0.40        | NaN          | KPNA4,RANBP1                                                                                                                                                                                                                                                                                                                                  |
| RANK Signaling in Osteoclasts                          | 0.05Gy 4h        | 0.24                    | 0.04        | NaN          | FOS,NFATC1                                                                                                                                                                                                                                                                                                                                    |
| <b>RANK Signaling in Osteoclasts</b>                   | <b>2Gy 2h</b>    | <b>1.37</b>             | <b>0.24</b> | <b>-1.51</b> | <b>BIRC2,ELK1,IKBKB,IKBKE,MAPK8,MITF,NFATC1,PIK3CB,PIK3CD,PPP3CC,PPP3R1</b>                                                                                                                                                                                                                                                                   |
| <b>RANK Signaling in Osteoclasts</b>                   | <b>2Gy 4h</b>    | <b>2.09</b>             | <b>0.42</b> | <b>-1.41</b> | <b>AKT1,ELK1,FOS,MAP2K1,MAP3K1,MAP3K7,MAPK8,NFATC1,NFKB1,NFKBIA,PIK3CB,PIK3CD,PPP3CA,PPP3CB,PPP3CC,PPP3R1,PTK2B,SRC,XIAP</b>                                                                                                                                                                                                                  |
| <b>RAR Activation</b>                                  | <b>0.05Gy 4h</b> | <b>2.13</b>             | <b>0.10</b> | <b>NaN</b>   | <b>FOS,JAK2,PNRC1,PRKCD,PRKCI,RARG,RXRB,SMARCA4,TGFB1,TRIM24</b>                                                                                                                                                                                                                                                                              |
| RAR Activation                                         | 2Gy 2h           | 0.53                    | 0.16        | NaN          | DUSP1,MAPK8,NCOR2,PDPK1,PIK3CB,PIK3CD,PPARGC1A,PRKCE,RAC1,RARG,RELB,RXRA,RXRB,SMAD3,SMAD7,TRIM24                                                                                                                                                                                                                                              |



| Ingenuity Canonical Pathways                                                | Model                  | $-\log(p\text{-value})$ | Ratio                | z-score               | Molecules                                                                                                                                                                                                             |
|-----------------------------------------------------------------------------|------------------------|-------------------------|----------------------|-----------------------|-----------------------------------------------------------------------------------------------------------------------------------------------------------------------------------------------------------------------|
| <b>RAR Activation</b>                                                       | <b>2Gy 4h</b>          | <b>1.72</b>             | <b>0.35</b>          | <b>NaN</b>            | <b>ADCY8,AKT1,BMP2,CCNH,CRABP2,CSNK2B,DUSP1,FOS,JAK2,MAP2K1,MAP3K1,MAPK8,NFKB1,PIK3CB,PIK3CD,PNRC1,PRKAR2A,PRKCD,PRKCE,PRKCI,PRKD3,PTEN,RARA,RDH11,RXR,RB,SMA D2,SMAD3,SMAD4,SMAD6,SMAD7,SMARCA4,SRC,TGFB1,TRIM24</b> |
| Reelin Signaling in Neurons                                                 | 0.05Gy 4h              | 0.45                    | 0.06                 | NaN                   | APBB1,RHOA,YES1                                                                                                                                                                                                       |
| <b>Reelin Signaling in Neurons</b>                                          | <b>2Gy 2h</b>          | <b>1.40</b>             | <b>0.24</b>          | <b>-0.63</b>          | <b>APBB1,APOE,CAMK2G,CDC42,ITGA5,MAP2K5,MAPK8,MTOR,NDEL1,PIK3CB,PIK3CD,RAC1</b>                                                                                                                                       |
| Reelin Signaling in Neurons                                                 | 2Gy 4h                 | 0.60                    | 0.30                 | 0.54                  | AKT1,APBB1,ARHGFEF3,CDK5R1,CFL1,CRK,GSK3B,MAP2K1,MAPK8,PIK3CB,PIK3CD,RHOA,SRC,V LDLR,YES1                                                                                                                             |
| Regulation of Actin-based Motility by Rho                                   | 0.05Gy 4h              | 0.99                    | 0.11                 | NaN                   | ACTA2,RHOA,RHOG                                                                                                                                                                                                       |
| Regulation of Actin-based Motility by Rho                                   | 2Gy 2h                 | 1.13                    | 0.26                 | -0.38                 | ACTA2,CDC42,ITGA5,RAC1,RHOB,RHOQ,RND3                                                                                                                                                                                 |
| Regulation of Actin-based Motility by Rho                                   | 2Gy 4h                 | 0.00                    | 0.22                 | 1.34                  | ACTA2,CFL1,PFN1,RAC3,RHOA,ROCK1                                                                                                                                                                                       |
| Regulation of Cellular Mechanics by Calpain Protease                        | 0.05Gy 2h              | 0.62                    | 0.03                 | NaN                   | CDKN1B                                                                                                                                                                                                                |
| Regulation of Cellular Mechanics by Calpain Protease                        | 2Gy 2h                 | 0.00                    | 0.14                 | NaN                   | CCNE1,CDKN1B,ITGA5,RRAS2                                                                                                                                                                                              |
| Regulation of Cellular Mechanics by Calpain Protease                        | 2Gy 4h                 | 0.35                    | 0.28                 | 0.00                  | CCNA2,CCNE1,EGFR,EZR,HRAS,KRAS,RRAS2,SRC                                                                                                                                                                              |
| <a href="#">Regulation of eIF4 and p70S6K Signaling</a>                     | <a href="#">2Gy 2h</a> | <a href="#">0.65</a>    | <a href="#">0.19</a> | <a href="#">-2.33</a> | <a href="#">IRS1,ITGA5,MTOR,PDPK1,PIK3CB,PIK3CD,PPP2CA,RRAS2,SOS1</a>                                                                                                                                                 |
| Regulation of eIF4 and p70S6K Signaling                                     | 2Gy 4h                 | 0.37                    | 0.27                 | 0.71                  | AKT1,EIF4A2,FAU,HRAS,KRAS,MAP2K1,PIK3CB,PIK3CD,PPP2CA,RPS19,RPS2,RPS29,RRAS2                                                                                                                                          |
| <b>Regulation of IL-2 Expression in Activated and Anergic T Lymphocytes</b> | <b>0.05Gy 4h</b>       | <b>1.37</b>             | <b>0.11</b>          | <b>NaN</b>            | <b>FOS,NFATC1,TGFB1,TGFB1,VAV2</b>                                                                                                                                                                                    |
| <b>Regulation of IL-2 Expression in Activated and Anergic T Lymphocytes</b> | <b>2Gy 2h</b>          | <b>2.06</b>             | <b>0.28</b>          | <b>NaN</b>            | <b>ELK1,IKBKB,IKBKE,MAPK8,NFATC1,NFATC4,PPP3CC,PPP3R1,RAC1,RRAS2,SMAD3,SOS1,TOB1</b>                                                                                                                                  |
| <b>Regulation of IL-2 Expression in Activated and Anergic T Lymphocytes</b> | <b>2Gy 4h</b>          | <b>3.69</b>             | <b>0.50</b>          | <b>NaN</b>            | <b>ELK1,FOS,HRAS,KRAS,MAP2K1,MAP3K1,MAPK8,NFAT5,NFATC1,NFKB1,NFKBIA,PPP3CA,PPP3 CB,PPP3CC,PPP3R1,RRAS2,SMAD2,SMAD3,SMAD4,TGFB1,TGFB1,TOB1,VAV2</b>                                                                    |
| Regulation of the Epithelial-Mesenchymal Transition Pathway                 | 0.05Gy 2h              | 0.60                    | 0.02                 | NaN                   | EGR1,SNAI2                                                                                                                                                                                                            |
| Regulation of the Epithelial-Mesenchymal Transition Pathway                 | 0.05Gy 4h              | 0.57                    | 0.06                 | NaN                   | EGR1,FGF5,JAK2,RHOA,TGFB1,TGFB1                                                                                                                                                                                       |
| Regulation of the Epithelial-Mesenchymal Transition Pathway                 | 2Gy 2h                 | 0.43                    | 0.16                 | NaN                   | EGR1,FGF2,FGF7,FGF9,JAG2,MAP2K5,mir-34,PIK3CB,PIK3CD,RRAS2,SMAD3,SNAI1,SNAI2,SOS1,TYK2,ZEB2                                                                                                                           |
| <b>Regulation of the Epithelial-Mesenchymal Transition Pathway</b>          | <b>2Gy 4h</b>          | <b>1.61</b>             | <b>0.34</b>          | <b>NaN</b>            | <b>ADAM17,AKT1,AXIN1,CTNNB1,EGFR,EGR1,ETS1,FGF2,FGF5,FZD1,GSK3B,HIF1A,HRAS,JAK2,KRAS,LEF1,MAP2K1,mir-34,NFKB1,NOTCH4,PIK3CB,PIK3CD,PSEN2,RBPJ,RHOA,RRAS2,SMAD2,SMAD3,SMAD4,SNAI2,TCF4,TCF7,TGFB1,TGFB1,WNT5A</b>      |
| Relaxin Signaling                                                           | 0.05Gy 4h              | 0.31                    | 0.05                 | NaN                   | FOS,GNAI2,GNG5                                                                                                                                                                                                        |
| Relaxin Signaling                                                           | 2Gy 2h                 | 0.00                    | 0.10                 | NaN                   | ELK1,GNAO1,NAPEPLD,PDE4D,PIK3CB,PIK3CD                                                                                                                                                                                |
| Relaxin Signaling                                                           | 2Gy 4h                 | 0.00                    | 0.24                 | 0.00                  | ADCY8,AKT1,APEX1,ELK1,FOS,GNAI2,GNAI3,GNG5,MAP2K1,NFKB1,NFKBIA,NPR3,PIK3CB,PIK3CD,PRKAR2A                                                                                                                             |
| Remodeling of Epithelial Adherens Junctions                                 | 0.05Gy 4h              | 0.94                    | 0.14                 | NaN                   | ACTA2,ARF6                                                                                                                                                                                                            |
| Remodeling of Epithelial Adherens Junctions                                 | 2Gy 2h                 | 0.91                    | 0.29                 | NaN                   | ACTA2,ARF6,TUBB2A,TUBB4B                                                                                                                                                                                              |
| Remodeling of Epithelial Adherens Junctions                                 | 2Gy 4h                 | 0.59                    | 0.36                 | NaN                   | ACTA2,ARF6,CTNNB1,SRC,TUBB2A                                                                                                                                                                                          |
| Renal Cell Carcinoma Signaling                                              | 0.05Gy 4h              | 0.33                    | 0.05                 | NaN                   | FOS,TGFB1                                                                                                                                                                                                             |
| Renal Cell Carcinoma Signaling                                              | 2Gy 2h                 | 0.59                    | 0.19                 | 0.00                  | CDC42,PIK3CB,PIK3CD,RAC1,RRAS2,SLC2A1,SOS1                                                                                                                                                                            |
| <b>Renal Cell Carcinoma Signaling</b>                                       | <b>2Gy 4h</b>          | <b>1.57</b>             | <b>0.41</b>          | <b>0.00</b>           | <b>AKT1,CRK,ETS1,FH,FOS,HIF1A,HRAS,KRAS,MAP2K1,PIK3CB,PIK3CD,RRAS2,SLC2A1,TGFB1,UB C</b>                                                                                                                              |
| Renin-Angiotensin Signaling                                                 | 0.05Gy 4h              | 0.55                    | 0.06                 | 0.00                  | FOS,JAK2,PRKCD,PRKCI                                                                                                                                                                                                  |
| Renin-Angiotensin Signaling                                                 | 2Gy 2h                 | 0.00                    | 0.14                 | -0.33                 | CCL2,ELK1,MAPK8,PIK3CB,PIK3CD,PRKCE,RAC1,RRAS2,SOS1                                                                                                                                                                   |



| Ingenuity Canonical Pathways                                                    | Model            | <b>-log(p-value)</b> | Ratio       | z-score      | Molecules                                                                                                                           |
|---------------------------------------------------------------------------------|------------------|----------------------|-------------|--------------|-------------------------------------------------------------------------------------------------------------------------------------|
| Renin-Angiotensin Signaling                                                     | 2Gy 4h           | 1.23                 | 0.34        | -1.79        | ADCY8,ATF2,ELK1,FOS,HRAS,ITPR2,JAK2,KRAS,MAP2K1,MAP3K1,MAPK8,NFKB1,PIK3CB,PIK3CD,PRKAR2A,PRKCD,PRKCE,PRKCI,PRKD3,PTGER2,PTK2B,RRAS2 |
| Retinoate Biosynthesis I                                                        | 2Gy 4h           | 0.00                 | 0.14        | NaN          | BMP2,RDH11                                                                                                                          |
| Retinoic acid Mediated Apoptosis Signaling                                      | 0.05Gy 4h        | 0.50                 | 0.07        | NaN          | RARG,RXRB                                                                                                                           |
| <b>Retinoic acid Mediated Apoptosis Signaling</b>                               | <b>2Gy 2h</b>    | <b>2.05</b>          | <b>0.33</b> | <b>0.38</b>  | <b>CASP3,CASP8,CFLAR,PARP2,RARG,RXRA,RXRB,TNFRSF10B,TNFRSF10D</b>                                                                   |
| <b>Retinoic acid Mediated Apoptosis Signaling</b>                               | <b>2Gy 4h</b>    | <b>2.12</b>          | <b>0.48</b> | <b>1.51</b>  | <b>BID,CASP3,CFLAR,CRABP2,PARP2,PARP9,RARA,RXRB,TNFRSF10A,TNFRSF10B,TNFRSF10C,TNFRSF10D,TNFSF10</b>                                 |
| Retinol Biosynthesis                                                            | 2Gy 2h           | 0.00                 | 0.08        | NaN          | LIPE                                                                                                                                |
| Retinol Biosynthesis                                                            | 2Gy 4h           | 0.00                 | 0.23        | NaN          | CES2,LIPE,RDH11                                                                                                                     |
| RhoA Signaling                                                                  | 0.05Gy 4h        | 0.44                 | 0.07        | NaN          | ACTA2,RHOA                                                                                                                          |
| RhoA Signaling                                                                  | 2Gy 2h           | 0.38                 | 0.17        | -1.34        | ACTA2,LIMK2,LPAR6,PLD1,RND3                                                                                                         |
| RhoA Signaling                                                                  | 2Gy 4h           | 0.98                 | 0.37        | 0.30         | ACTA2,CFL1,EZR,LIMK2,LPAR1,PFN1,PLD1,PTK2B,RHOA,ROCK1,ROCK2                                                                         |
| RhoGDI Signaling                                                                | 0.05Gy 4h        | 1.21                 | 0.10        | NaN          | ACTA2,GNAI2,GNG5,RHOA,RHOG                                                                                                          |
| RhoGDI Signaling                                                                | 2Gy 2h           | 0.55                 | 0.18        | 0.71         | ACTA2,CDC42,GNAO1,ITGA5,LIMK2,RAC1,RHOB,RHOQ,RND3                                                                                   |
| RhoGDI Signaling                                                                | 2Gy 4h           | 0.40                 | 0.28        | -0.63        | ACTA2,ARHGEF3,CD44,CFL1,EZR,GNAI2,GNAI3,GNG5,LIMK2,RAC3,RHOA,ROCK1,ROCK2,SRC                                                        |
| <b>Role of BRCA1 in DNA Damage Response</b>                                     | <b>0.05Gy 4h</b> | <b>1.91</b>          | <b>0.18</b> | <b>NaN</b>   | <b>CDKN1A,E2F4,E2F5,SMARCA4</b>                                                                                                     |
| Role of BRCA1 in DNA Damage Response                                            | 2Gy 2h           | 0.00                 | 0.14        | NaN          | CDKN1A,CHEK1,MSH6                                                                                                                   |
| <b>Role of BRCA1 in DNA Damage Response</b>                                     | <b>2Gy 4h</b>    | <b>1.53</b>          | <b>0.46</b> | <b>0.71</b>  | <b>ATM,BARD1,BRCA2,CDKN1A,E2F1,E2F5,GADD45A,MSH6,RBL2,SMARCA4</b>                                                                   |
| <b>Role of CHK Proteins in Cell Cycle Checkpoint Control</b>                    | <b>0.05Gy 4h</b> | <b>2.66</b>          | <b>0.29</b> | <b>0.00</b>  | <b>CDC25C,CDKN1A,E2F4,E2F5</b>                                                                                                      |
| Role of CHK Proteins in Cell Cycle Checkpoint Control                           | 2Gy 2h           | 0.91                 | 0.29        | NaN          | CDKN1A,CHEK1,PCNA,PPP2CA                                                                                                            |
| Role of CHK Proteins in Cell Cycle Checkpoint Control                           | 2Gy 4h           | 0.95                 | 0.43        | 0.45         | ATM,CDKN1A,E2F1,E2F5,PCNA,PPP2CA                                                                                                    |
| <b>Role of Cytokines in Mediating Communication between Immune Cells</b>        | <b>0.05Gy 2h</b> | <b>1.56</b>          | <b>0.07</b> | <b>NaN</b>   | <b>IL12A,IL6</b>                                                                                                                    |
| Role of Cytokines in Mediating Communication between Immune Cells               | 0.05Gy 4h        | 0.00                 | 0.04        | NaN          | TGFB1                                                                                                                               |
| Role of Cytokines in Mediating Communication between Immune Cells               | 2Gy 2h           | 0.00                 | 0.07        | NaN          | CXCL8,IL6                                                                                                                           |
| Role of Cytokines in Mediating Communication between Immune Cells               | 2Gy 4h           | 0.00                 | 0.07        | NaN          | IL12A,TGFB1                                                                                                                         |
| <b>Role of Hypercytokinemia/hyperchemokine in the Pathogenesis of Influenza</b> | <b>0.05Gy 2h</b> | <b>1.84</b>          | <b>0.10</b> | <b>NaN</b>   | <b>IL12A,IL6</b>                                                                                                                    |
| Role of Hypercytokinemia/hyperchemokine in the Pathogenesis of Influenza        | 2Gy 2h           | 0.26                 | 0.15        | NaN          | CCL2,CXCL8,IL6                                                                                                                      |
| Role of Hypercytokinemia/hyperchemokine in the Pathogenesis of Influenza        | 2Gy 4h           | 0.00                 | 0.05        | NaN          | IL12A                                                                                                                               |
| Role of IL-17A in Arthritis                                                     | 0.05Gy 2h        | 0.63                 | 0.04        | NaN          | PTGS2                                                                                                                               |
| <b>Role of IL-17A in Arthritis</b>                                              | <b>2Gy 2h</b>    | <b>1.47</b>          | <b>0.29</b> | <b>NaN</b>   | <b>CCL2,CCL7,CXCL1,CXCL8,MAPK8,PIK3CB,PIK3CD,PTGS2</b>                                                                              |
| Role of IL-17A in Arthritis                                                     | 2Gy 4h           | 0.60                 | 0.32        | NaN          | ATF2,IL17RA,MAP2K1,MAPK8,NFKB1,NFKBIA,PIK3CB,PIK3CD,PTGS2                                                                           |
| Role of IL-17A in Psoriasis                                                     | 2Gy 2h           | 0.38                 | 0.20        | NaN          | CXCL1,CXCL8                                                                                                                         |
| Role of IL-17A in Psoriasis                                                     | 2Gy 4h           | 0.00                 | 0.10        | NaN          | IL17RA                                                                                                                              |
| <b>Role of IL-17F in Allergic Inflammatory Airway Diseases</b>                  | <b>0.05Gy 2h</b> | <b>1.76</b>          | <b>0.09</b> | <b>NaN</b>   | <b>IL11,IL6</b>                                                                                                                     |
| <b>Role of IL-17F in Allergic Inflammatory Airway Diseases</b>                  | <b>2Gy 2h</b>    | <b>1.58</b>          | <b>0.32</b> | <b>-1.63</b> | <b>ATF4,CCL2,CCL7,CXCL1,CXCL8,IL11,IL6</b>                                                                                          |

| Ingenuity Canonical Pathways                                                          | Model            | <b>-log(p-value)</b> | Ratio       | z-score    | Molecules                                                                                                                                                                                                                                                                                                                                           |
|---------------------------------------------------------------------------------------|------------------|----------------------|-------------|------------|-----------------------------------------------------------------------------------------------------------------------------------------------------------------------------------------------------------------------------------------------------------------------------------------------------------------------------------------------------|
| Role of IL-17F in Allergic Inflammatory Airway Diseases                               | 2Gy 4h           | 0.00                 | 0.23        | 0.00       | ATF2,ATF4,IL17RA,MAP2K1,NFKB1                                                                                                                                                                                                                                                                                                                       |
| <b>Role of JAK family kinases in IL-6-type Cytokine Signaling</b>                     | <b>0.05Gy 2h</b> | <b>2.21</b>          | <b>0.15</b> | <b>NaN</b> | <b>IL6,SOCS3</b>                                                                                                                                                                                                                                                                                                                                    |
| Role of JAK family kinases in IL-6-type Cytokine Signaling                            | 0.05Gy 4h        | 0.37                 | 0.08        | NaN        | JAK2                                                                                                                                                                                                                                                                                                                                                |
| <b>Role of JAK family kinases in IL-6-type Cytokine Signaling</b>                     | <b>2Gy 2h</b>    | <b>2.27</b>          | <b>0.46</b> | <b>NaN</b> | <b>IL6,IL6R,MAPK8,SOCS1,SOCS3,TYK2</b>                                                                                                                                                                                                                                                                                                              |
| Role of JAK family kinases in IL-6-type Cytokine Signaling                            | 2Gy 4h           | 0.68                 | 0.39        | NaN        | IL6R,IL6ST,JAK2,MAPK8,SOCS3                                                                                                                                                                                                                                                                                                                         |
| Role of JAK1 and JAK3 in $\hat{I}^{3c}$ Cytokine Signaling                            | 0.05Gy 2h        | 0.56                 | 0.03        | NaN        | SOCS3                                                                                                                                                                                                                                                                                                                                               |
| Role of JAK1 and JAK3 in $\hat{I}^{3c}$ Cytokine Signaling                            | 0.05Gy 4h        | 0.00                 | 0.03        | NaN        | JAK2                                                                                                                                                                                                                                                                                                                                                |
| Role of JAK1 and JAK3 in $\hat{I}^{3c}$ Cytokine Signaling                            | 2Gy 2h           | 1.03                 | 0.24        | NaN        | IL4R,IRS1,IRS2,PIK3CB,PIK3CD,RRAS2,SOCS1,SOCS3                                                                                                                                                                                                                                                                                                      |
| Role of JAK1 and JAK3 in $\hat{I}^{3c}$ Cytokine Signaling                            | 2Gy 4h           | 0.31                 | 0.27        | NaN        | HRAS,IL4R,JAK2,KRAS,PIK3CB,PIK3CD,PTK2B,RRAS2,SOCS3                                                                                                                                                                                                                                                                                                 |
| Role of JAK1, JAK2 and TYK2 in Interferon Signaling                                   | 0.05Gy 4h        | 0.42                 | 0.09        | NaN        | JAK2                                                                                                                                                                                                                                                                                                                                                |
| Role of JAK1, JAK2 and TYK2 in Interferon Signaling                                   | 2Gy 2h           | 0.71                 | 0.27        | NaN        | PTPN2,SOCS1,TYK2                                                                                                                                                                                                                                                                                                                                    |
| Role of JAK1, JAK2 and TYK2 in Interferon Signaling                                   | 2Gy 4h           | 0.26                 | 0.27        | NaN        | IFNGR1,JAK2,NFKB1                                                                                                                                                                                                                                                                                                                                   |
| Role of JAK2 in Hormone-like Cytokine Signaling                                       | 0.05Gy 2h        | 0.76                 | 0.05        | NaN        | SOCS3                                                                                                                                                                                                                                                                                                                                               |
| Role of JAK2 in Hormone-like Cytokine Signaling                                       | 0.05Gy 4h        | 0.69                 | 0.10        | NaN        | JAK2,SOCS6                                                                                                                                                                                                                                                                                                                                          |
| <b>Role of JAK2 in Hormone-like Cytokine Signaling</b>                                | <b>2Gy 2h</b>    | <b>3.10</b>          | <b>0.45</b> | <b>NaN</b> | <b>IRS1,IRS2,SH2B2,SOCS1,SOCS2,SOCS3,SOCS5,SOCS6,TYK2</b>                                                                                                                                                                                                                                                                                           |
| <b>Role of JAK2 in Hormone-like Cytokine Signaling</b>                                | <b>2Gy 4h</b>    | <b>1.39</b>          | <b>0.45</b> | <b>NaN</b> | <b>GHR,JAK2,PRLR,SH2B2,SOCS2,SOCS3,SOCS5,SOCS6,SOCS7</b>                                                                                                                                                                                                                                                                                            |
| Role of Macrophages, Fibroblasts and Endothelial Cells in Rheumatoid Arthritis        | 0.05Gy 2h        | 0.63                 | 0.02        | NaN        | IL6,MYC,SOCS3                                                                                                                                                                                                                                                                                                                                       |
| Role of Macrophages, Fibroblasts and Endothelial Cells in Rheumatoid Arthritis        | 0.05Gy 4h        | 0.00                 | 0.04        | NaN        | FOS,JAK2,NFATC1,PRKCD,PRKCI,RHOA,TGFB1                                                                                                                                                                                                                                                                                                              |
| Role of Macrophages, Fibroblasts and Endothelial Cells in Rheumatoid Arthritis        | 2Gy 2h           | 0.53                 | 0.16        | NaN        | ATF4,CAMK2G,CCL2,CEBPB,CEBPD,CXCL8,FGF2,GNAO1,IKBKB,IKBKE,IL16,IL6,IL6R,MYC,NFATC1,NFATC4,PDGFA,PIK3CB,PIK3CD,PPP3CC,PPP3R1,PRKCE,RAC1,RIPK1,RRAS2,SOCS1,SOCS3,TNFRSF1B                                                                                                                                                                             |
| <b>Role of Macrophages, Fibroblasts and Endothelial Cells in Rheumatoid Arthritis</b> | <b>2Gy 4h</b>    | <b>1.52</b>          | <b>0.31</b> | <b>NaN</b> | <b>AKT1,ATF2,ATF4,AXIN1,CEBPD,CEBPG,CSF1,CTNNB1,DKK1,FGF2,FOS,FZD1,GSK3B,HRAS,ICAM1,IL16,IL17RA,IL18R1,IL1R1,IL6R,IL6ST,JAK2,KRAS,LEF1,MAP2K1,MAP3K7,NFAT5,NFATC1,NFKB1,NFKBIA,NGFR,PGF,PIK3CB,PIK3CD,PPP3CA,PPP3CB,PPP3CC,PPP3R1,PRKCD,PRKCE,PRKCI,PRKD3,RHOA,RIPK1,ROCK1,ROCK2,RRAS2,SOCS3,SRC,TCF4,TCF7,TGFB1,TNFRSF11B,TNFRSF1B,TRAF3,WNT5A</b> |
| Role of MAPK Signaling in the Pathogenesis of Influenza                               | 0.05Gy 2h        | 0.62                 | 0.03        | NaN        | PTGS2                                                                                                                                                                                                                                                                                                                                               |
| Role of MAPK Signaling in the Pathogenesis of Influenza                               | 0.05Gy 4h        | 0.00                 | 0.03        | NaN        | BCL2                                                                                                                                                                                                                                                                                                                                                |
| Role of MAPK Signaling in the Pathogenesis of Influenza                               | 2Gy 2h           | 0.67                 | 0.21        | NaN        | CASP3,CCL2,MAPK8,PNPLA8,PTGS2,RRAS2                                                                                                                                                                                                                                                                                                                 |
| Role of MAPK Signaling in the Pathogenesis of Influenza                               | 2Gy 4h           | 1.07                 | 0.38        | NaN        | AKT1,ATF2,BCL2,CASP3,HRAS,KRAS,MAP2K1,MAPK8,PNPLA8,PTGS2,RRAS2                                                                                                                                                                                                                                                                                      |
| Role of NANOG in Mammalian Embryonic Stem Cell Pluripotency                           | 0.05Gy 4h        | 0.00                 | 0.02        | NaN        | JAK2                                                                                                                                                                                                                                                                                                                                                |
| Role of NANOG in Mammalian Embryonic Stem Cell Pluripotency                           | 2Gy 2h           | 0.00                 | 0.10        | -1.34      | GATA6,PIK3CB,PIK3CD,RRAS2,SOS1,TYK2                                                                                                                                                                                                                                                                                                                 |
| Role of NANOG in Mammalian Embryonic Stem Cell Pluripotency                           | 2Gy 4h           | 1.07                 | 0.33        | -0.28      | AKT1,AXIN1,BMP1,BMP2,BMP4,BMPR2,CTNNB1,FZD1,GSK3B,HRAS,IL6ST,JAK2,KRAS,LIF,LIFR,MAP2K1,PIK3CB,PIK3CD,RRAS2,SMAD4,WNT5A                                                                                                                                                                                                                              |
| Role of NFAT in Cardiac Hypertrophy                                                   | 0.05Gy 2h        | 0.64                 | 0.02        | NaN        | IL11,IL6                                                                                                                                                                                                                                                                                                                                            |
| Role of NFAT in Cardiac Hypertrophy                                                   | 0.05Gy 4h        | 0.66                 | 0.06        | 0.00       | GNAI2,GNG5,PRKCD,PRKCI,TGFB1,TGFB1                                                                                                                                                                                                                                                                                                                  |

| Inguenuity Canonical Pathways                                                       | Model                  | <b>-log(p-value)</b> | Ratio                | z-score               | Molecules                                                                                                                                                                                                                                               |
|-------------------------------------------------------------------------------------|------------------------|----------------------|----------------------|-----------------------|---------------------------------------------------------------------------------------------------------------------------------------------------------------------------------------------------------------------------------------------------------|
| Role of NFAT in Cardiac Hypertrophy                                                 | 2Gy 2h                 | 0.43                 | 0.16                 | -1.39                 | CACNA1A,CAMK2G,HDAC6,IL11,IL6,MAPK8,MEF2D,NFATC4,PIK3CB,PIK3CD,PPP3CC,PPP3R1,PRKCE,RRAS2,SOS1                                                                                                                                                           |
| <b>Role of NFAT in Cardiac Hypertrophy</b>                                          | <b>2Gy 4h</b>          | <b>1.40</b>          | <b>0.33</b>          | <b>-0.71</b>          | <b>ADCY8,AKT1,CACNA1C,CAMK1,GNAI2,GNAI3,GNG5,GSK3B,HRAS,IL6ST,ITPR2,KRAS,LIF,MAP2K1,MAP3K1,MAP3K7,MAPK8,PIK3CB,PIK3CD,PPP3CA,PPP3CB,PPP3CC,PPP3R1,PRKAR2A,PRKCD,PRKCE,PRKCI,PRKD3,RRAS2,SRC,TGFB1,TGFB1</b>                                             |
| Role of NFAT in Regulation of the Immune Response                                   | 0.05Gy 4h              | 0.48                 | 0.06                 | NaN                   | FOS,GNAI2,GNG5,NFATC1                                                                                                                                                                                                                                   |
| <a href="#">Role of NFAT in Regulation of the Immune Response</a>                   | <a href="#">2Gy 2h</a> | <a href="#">0.59</a> | <a href="#">0.17</a> | <a href="#">-2.31</a> | <a href="#">GNAO1,IKBKB,IKBKE,MEF2D,NFATC1,NFATC4,PIK3CB,PIK3CD,PPP3CC,PPP3R1,RRAS2,SOS1</a>                                                                                                                                                            |
| Role of NFAT in Regulation of the Immune Response                                   | 2Gy 4h                 | 0.92                 | 0.32                 | -0.69                 | AKT1,ATF2,FOS,GNAI2,GNAI3,GNG5,GSK3B,HRAS,ITPR2,KRAS,MAP2K1,NFAT5,NFATC1,NFKB1,NFKBIA,PIK3CB,PIK3CD,PPP3CA,PPP3CB,PPP3CC,PPP3R1,RRAS2                                                                                                                   |
| Role of Oct4 in Mammalian Embryonic Stem Cell Pluripotency                          | 0.05Gy 4h              | 1.15                 | 0.13                 | NaN                   | JARID2,REST,RXR8                                                                                                                                                                                                                                        |
| Role of Oct4 in Mammalian Embryonic Stem Cell Pluripotency                          | 2Gy 2h                 | 0.00                 | 0.04                 | NaN                   | RXR8                                                                                                                                                                                                                                                    |
| Role of Oct4 in Mammalian Embryonic Stem Cell Pluripotency                          | 2Gy 4h                 | 0.71                 | 0.35                 | NaN                   | BMI1,ETS2,IGF2BP1,JARID2,PHB,RARA,REST,RXR8                                                                                                                                                                                                             |
| Role of Osteoblasts, Osteoclasts and Chondrocytes in Rheumatoid Arthritis           | 0.05Gy 2h              | 0.44                 | 0.01                 | NaN                   | IL11,IL6                                                                                                                                                                                                                                                |
| Role of Osteoblasts, Osteoclasts and Chondrocytes in Rheumatoid Arthritis           | 0.05Gy 4h              | 0.00                 | 0.03                 | NaN                   | BCL2,FOS,NFATC1,TGFB1                                                                                                                                                                                                                                   |
| Role of Osteoblasts, Osteoclasts and Chondrocytes in Rheumatoid Arthritis           | 2Gy 2h                 | 0.00                 | 0.11                 | NaN                   | BIRC2,IKBKB,IKBKE,IL11,IL6,ITGA5,MAPK8,NFATC1,NFATC4,PIK3CB,PIK3CD,PPP3CC,PPP3R1,RUNX2,TNFRSF1B                                                                                                                                                         |
| Role of Osteoblasts, Osteoclasts and Chondrocytes in Rheumatoid Arthritis           | 2Gy 4h                 | 1.05                 | 0.30                 | NaN                   | ADAM17,AKT1,AXIN1,BCL2,BMP1,BMP2,BMP4,BMPR2,CSF1,CTNNA1,DKK1,FOS,FZD1,GSK3B,IL18R1,IL1R1,LEF1,MAP3K7,MAPK8,NFAT5,NFATC1,NFKB1,NFKBIA,NGFR,PIK3CB,PIK3CD,PPP3CA,PPP3CB,PPP3CC,PPP3R1,PTK2B,SMAD4,SMAD6,SRC,TCF4,TCF7,TGFB1,TNFRSF11B,TNFRSF1B,WNT5A,XIAP |
| Role of p14/p19ARF in Tumor Suppression                                             | 0.05Gy 4h              | 0.34                 | 0.07                 | NaN                   | MDM2                                                                                                                                                                                                                                                    |
| <b>Role of p14/p19ARF in Tumor Suppression</b>                                      | <b>2Gy 2h</b>          | <b>1.44</b>          | <b>0.36</b>          | <b>0.00</b>           | <b>MDM2,NPM1,PIK3CB,PIK3CD,RAC1</b>                                                                                                                                                                                                                     |
| Role of p14/p19ARF in Tumor Suppression                                             | 2Gy 4h                 | 0.95                 | 0.43                 | 0.45                  | CDKN2A,E2F1,MDM2,NPM1,PIK3CB,PIK3CD                                                                                                                                                                                                                     |
| <b>Role of Pattern Recognition Receptors in Recognition of Bacteria and Viruses</b> | <b>0.05Gy 2h</b>       | <b>1.35</b>          | <b>0.03</b>          | <b>NaN</b>            | <b>IL11,IL12A,IL6</b>                                                                                                                                                                                                                                   |
| Role of Pattern Recognition Receptors in Recognition of Bacteria and Viruses        | 0.05Gy 4h              | 0.00                 | 0.03                 | NaN                   | PRKCD,PRKCI,TGFB1                                                                                                                                                                                                                                       |
| Role of Pattern Recognition Receptors in Recognition of Bacteria and Viruses        | 2Gy 2h                 | 0.00                 | 0.11                 | -0.82                 | CXCL8,IL11,IL6,MAPK8,NOD1,PIK3CB,PIK3CD,PRKCE,RNASEL                                                                                                                                                                                                    |
| Role of Pattern Recognition Receptors in Recognition of Bacteria and Viruses        | 2Gy 4h                 | 0.00                 | 0.21                 | -0.58                 | CLCF1,CNTF,EIF2AK2,IFIH1,IL12A,IRF7,LIF,MAPK8,NFKB1,NOD1,PIK3CB,PIK3CD,PRKCD,PRKCE,PRKCI,PRKD3,TGFB1,TNFSF10                                                                                                                                            |
| Role of PI3K/AKT Signaling in the Pathogenesis of Influenza                         | 0.05Gy 4h              | 0.00                 | 0.04                 | NaN                   | GNAI2                                                                                                                                                                                                                                                   |
| Role of PI3K/AKT Signaling in the Pathogenesis of Influenza                         | 2Gy 2h                 | 0.00                 | 0.08                 | NaN                   | PIK3CB,PIK3CD                                                                                                                                                                                                                                           |
| Role of PI3K/AKT Signaling in the Pathogenesis of Influenza                         | 2Gy 4h                 | 1.04                 | 0.39                 | 0.33                  | AKT1,CRK,GNAI2,GNAI3,GSK3B,MAP2K1,NFKB1,NFKBIA,PIK3CB,PIK3CD                                                                                                                                                                                            |

| Ingenuity Canonical Pathways                                         | Model         | $-\log(p\text{-value})$ | Ratio       | z-score      | Molecules                                                                                                                                                                                                                                                                                                          |
|----------------------------------------------------------------------|---------------|-------------------------|-------------|--------------|--------------------------------------------------------------------------------------------------------------------------------------------------------------------------------------------------------------------------------------------------------------------------------------------------------------------|
| Role of PKR in Interferon Induction and Antiviral Response           | 2Gy 2h        | 0.73                    | 0.23        | NaN          | CASP3,CASP8,IKBKB,IKBKE,RNASEL                                                                                                                                                                                                                                                                                     |
| Role of PKR in Interferon Induction and Antiviral Response           | 2Gy 4h        | 1.13                    | 0.41        | NaN          | AKT1,ATF2,BID,CASP3,EIF2AK2,MAP3K7,NFKB1,NFKBIA,TRAF3                                                                                                                                                                                                                                                              |
| Role of RIG1-like Receptors in Antiviral Innate Immunity             | 2Gy 2h        | 0.75                    | 0.25        | -1.00        | CASP8,IKBKB,IKBKE,RIPK1                                                                                                                                                                                                                                                                                            |
| Role of RIG1-like Receptors in Antiviral Innate Immunity             | 2Gy 4h        | 0.72                    | 0.38        | 0.45         | IFIH1,IRF7,NFKB1,NFKBIA,RIPK1,TRAF3                                                                                                                                                                                                                                                                                |
| Role of Tissue Factor in Cancer                                      | 0.05Gy 2h     | 0.35                    | 0.02        | NaN          | EGR1                                                                                                                                                                                                                                                                                                               |
| Role of Tissue Factor in Cancer                                      | 0.05Gy 4h     | 0.56                    | 0.06        | NaN          | EGR1,FGF5,JAK2,YES1                                                                                                                                                                                                                                                                                                |
| <b>Role of Tissue Factor in Cancer</b>                               | <b>2Gy 2h</b> | <b>1.60</b>             | <b>0.24</b> | <b>NaN</b>   | <b>BCL2L1,CASP3,CCN1,CDC42,CXCL1,CXCL8,EGR1,F3,LIMK2,MTOR,PIK3CB,PIK3CD,PLAUR,RAC1,RRAS2</b>                                                                                                                                                                                                                       |
| <b>Role of Tissue Factor in Cancer</b>                               | <b>2Gy 4h</b> | <b>1.30</b>             | <b>0.35</b> | <b>NaN</b>   | <b>AKT1,BCL2L1,CASP3,CCN1,CCN2,CFL1,CSF1,EGFR,EGR1,FGF5,HRAS,JAK2,KRAS,LIMK2,P4HB,PIK3CB,PIK3CD,PTEN,PTK2B,RRAS2,SRC,YES1</b>                                                                                                                                                                                      |
| Role of Wnt/GSK-3 $\beta$ Signaling in the Pathogenesis of Influenza | 2Gy 4h        | 0.74                    | 0.35        | -1.00        | AXIN1,CTNNB1,FZD1,GSK3B,LEF1,NCOA2,TCF4,TCF7,WNT5A                                                                                                                                                                                                                                                                 |
| Salvage Pathways of Pyrimidine Ribonucleotides                       | 0.05Gy 4h     | 0.50                    | 0.07        | NaN          | NME2,PRKCD                                                                                                                                                                                                                                                                                                         |
| Salvage Pathways of Pyrimidine Ribonucleotides                       | 2Gy 2h        | 0.77                    | 0.22        | -0.82        | ACVR2A,LIMK2,MAPK7,MAPK8,PRKCE,SGK1                                                                                                                                                                                                                                                                                |
| Salvage Pathways of Pyrimidine Ribonucleotides                       | 2Gy 4h        | 0.45                    | 0.30        | 0.71         | ACVR2A,EIF2AK2,LIMK2,MAP2K1,MAPK8,NME2,PRKCD,PRKCE                                                                                                                                                                                                                                                                 |
| SAPK/JNK Signaling                                                   | 0.05Gy 4h     | 0.28                    | 0.05        | NaN          | GNG5,NFATC1                                                                                                                                                                                                                                                                                                        |
| <b>SAPK/JNK Signaling</b>                                            | <b>2Gy 2h</b> | <b>1.65</b>             | <b>0.27</b> | <b>0.30</b>  | <b>CDC42,ELK1,IRS1,MAPK8,NFATC1,PIK3CB,PIK3CD,RAC1,RIPK1,RRAS2,SOS1</b>                                                                                                                                                                                                                                            |
| <b>SAPK/JNK Signaling</b>                                            | <b>2Gy 4h</b> | <b>1.83</b>             | <b>0.42</b> | <b>-0.73</b> | <b>ATF2,CRK,ELK1,GADD45A,GNG5,HRAS,KRAS,MAP3K1,MAP3K7,MAP4K4,MAPK8,NFATC1,PIK3CB,PIK3CD,RAC3,RIPK1,RRAS2</b>                                                                                                                                                                                                       |
| Semaphorin Signaling in Neurons                                      | 0.05Gy 4h     | 0.60                    | 0.09        | NaN          | RHOA,RHOG                                                                                                                                                                                                                                                                                                          |
| Semaphorin Signaling in Neurons                                      | 2Gy 2h        | 1.03                    | 0.26        | NaN          | CDC42,LIMK2,RAC1,RHOB,RHOQ,RND3                                                                                                                                                                                                                                                                                    |
| Semaphorin Signaling in Neurons                                      | 2Gy 4h        | 0.46                    | 0.30        | NaN          | CFL1,LIMK2,NRP1,RAC3,RHOA,ROCK1,ROCK2                                                                                                                                                                                                                                                                              |
| Senescence Pathway                                                   | 0.05Gy 2h     | 0.48                    | 0.02        | NaN          | CDKN1B,IL6                                                                                                                                                                                                                                                                                                         |
| Senescence Pathway                                                   | 0.05Gy 4h     | 1.11                    | 0.07        | -0.33        | CDC25C,CDKN1A,E2F4,E2F5,MDM2,NFATC1,PCGF2,TGFB1,TGFBR1                                                                                                                                                                                                                                                             |
| <b>Senescence Pathway</b>                                            | <b>2Gy 2h</b> | <b>2.79</b>             | <b>0.24</b> | <b>-1.67</b> | <b>BKE,IL6,ING1,MAP2K5,MAPK7,MDM2,MTOR,NFATC1,NFATC4,PIK3CB,PIK3CD,PPP2CA,PPP3CC,PPP3R1,RRAS2,SERPINE1,SMAD3,SMAD7</b>                                                                                                                                                                                             |
| <b>Senescence Pathway</b>                                            | <b>2Gy 4h</b> | <b>3.61</b>             | <b>0.39</b> | <b>-1.44</b> | <b>ACVR1,ACVR1B,ACVR2A,AKT1,ATM,BMPR2,CACNA1C,CBX2,CCNB1,CDC25B,CDKN1A,CDKN2A,CDKN2B,DLG1,E2F1,E2F5,EED,ETS1,ETS2,FOXO3,GADD45A,HRAS,ITPR2,KRAS,MAP2K1,MAP3K7,MDM2,NFAT5,NFATC1,NFKB1,PHF1,PIK3CB,PIK3CD,PPP1CA,PPP2CA,PPP3CA,PPP3CB,PPP3C,C,PPP3R1,PTEN,RBL2,RRAS2,SMAD2,SMAD3,SMAD4,SMAD6,SMAD7,TGFB1,TGFBR1</b> |
| Serine Biosynthesis                                                  | 2Gy 4h        | 0.24                    | 0.33        | NaN          | PSPH                                                                                                                                                                                                                                                                                                               |
| Serotonin Receptor Signaling                                         | 2Gy 2h        | 0.00                    | 0.06        | NaN          | GCH1                                                                                                                                                                                                                                                                                                               |
| Serotonin Receptor Signaling                                         | 2Gy 4h        | 0.00                    | 0.13        | NaN          | ADCY8,GCH1                                                                                                                                                                                                                                                                                                         |
| Sertoli Cell-Sertoli Cell Junction Signaling                         | 0.05Gy 4h     | 0.00                    | 0.03        | NaN          | ACTA2,RAB8B                                                                                                                                                                                                                                                                                                        |
| Sertoli Cell-Sertoli Cell Junction Signaling                         | 2Gy 2h        | 0.00                    | 0.13        | NaN          | ACTA2,CDC42,ELK1,ITGA5,MAPK8,RAC1,RRAS2,TUBB2A,TUBB4B                                                                                                                                                                                                                                                              |
| <b>Sertoli Cell-Sertoli Cell Junction Signaling</b>                  | <b>2Gy 4h</b> | <b>1.54</b>             | <b>0.36</b> | <b>NaN</b>   | <b>ACTA2,AKT1,ATF2,AXIN1,BCAR1,CTNNB1,DLG1,ELK1,GSK3B,HRAS,KRAS,MAP2K1,MAP3K1,MAP3K7,MAPK8,NECTIN1,NECTIN2,PRKAR2A,PTEN,RAB8B,RRAS2,SORBS1,SRC,TJP1,TUBB2A</b>                                                                                                                                                     |
| Signaling by Rho Family GTPases                                      | 0.05Gy 4h     | 1.23                    | 0.08        | 2.00         | ACTA2,FOS,GNAI2,GNG5,PRKCI,RHOA,RHOG                                                                                                                                                                                                                                                                               |

| Ingenuity Canonical Pathways                       | Model            | <b>-log(p-value)</b> | Ratio       | z-score      | Molecules                                                                                                                                                                                                                                                            |
|----------------------------------------------------|------------------|----------------------|-------------|--------------|----------------------------------------------------------------------------------------------------------------------------------------------------------------------------------------------------------------------------------------------------------------------|
| Signaling by Rho Family GTPases                    | 2Gy 2h           | 0.57                 | 0.17        | -0.83        | ACTA2,CDC42,ELK1,GNAO1,ITGA5,LIMK2,MAPK8,PIK3CB,PIK3CD,PLD1,RAC1,RHOB,RHOQ,RND3                                                                                                                                                                                      |
| Signaling by Rho Family GTPases                    | 2Gy 4h           | 0.77                 | 0.30        | 0.23         | ACTA2,ARHGEF3,CFL1,DES,ELK1,EZR,FOS,GNAI2,GNAI3,GNG5,LIMK2,MAP2K1,MAPK8,NFKB1,NOX4,PIK3CB,PIK3CD,PLD1,PRKCI,PTK2B,RAC3,RHOA,ROCK1,ROCK2,SLC9A1                                                                                                                       |
| Sirtuin Signaling Pathway                          | 0.05Gy 2h        | 0.22                 | 0.01        | NaN          | MYC                                                                                                                                                                                                                                                                  |
| <b>Sirtuin Signaling Pathway</b>                   | <b>0.05Gy 4h</b> | <b>1.35</b>          | <b>0.08</b> | <b>0.38</b>  | <b>G6PD,GABPA,HSF1,NDUFS8,NDUFV3,NR1H2,STK11,TRIM28</b>                                                                                                                                                                                                              |
| Sirtuin Signaling Pathway                          | 2Gy 2h           | 0.00                 | 0.13        | 0.00         | ATG9A,BCL2L11,CXCL8,DUSP6,MAP1LC3B,MAPK7,MTOR,MYC,NAMPT,PPARGC1A,SLC2A1,XPC                                                                                                                                                                                          |
| <b>Sirtuin Signaling Pathway</b>                   | <b>2Gy 4h</b>    | <b>4.18</b>          | <b>0.43</b> | <b>0.54</b>  | <b>AKT1,APEX1,ARNTL,ATG9A,ATP5F1A,ATP5PF,CPT1A,DUSP6,E2F1,ESRRA,FOXO3,G6PD,GABPA,GADD45A,GLUD1,GSK3B,HIF1A,HSF1,MAP1LC3A,MAP1LC3B,NAMPT,NDUFS1,NDUFS3,NDUFS8,NDUFV1,NDUFV3,NFKB1,NR1H2,NR1H3,PGK1,PPARA,SLC25A5,SLC2A1,SOD1,SOD3,SP1,STK11,TRIM28,TSPO,VDAC1,XPC</b> |
| <b>Small Cell Lung Cancer Signaling</b>            | <b>0.05Gy 2h</b> | <b>2.10</b>          | <b>0.07</b> | <b>NaN</b>   | <b>CDKN1B,MYC,PTGS2</b>                                                                                                                                                                                                                                              |
| Small Cell Lung Cancer Signaling                   | 0.05Gy 4h        | 0.53                 | 0.07        | NaN          | BCL2,MAX,RXR                                                                                                                                                                                                                                                         |
| <b>Small Cell Lung Cancer Signaling</b>            | <b>2Gy 2h</b>    | <b>2.15</b>          | <b>0.29</b> | <b>-2.12</b> | <b>BCL2L1,BIRC2,CCNE1,CDKN1B,IKBK,IKBKE,MAX,MYC,PIK3CB,PIK3CD,PTGS2,RXRA,RXR</b>                                                                                                                                                                                     |
| <b>Small Cell Lung Cancer Signaling</b>            | <b>2Gy 4h</b>    | <b>2.09</b>          | <b>0.42</b> | <b>-0.63</b> | <b>ABL1,AKT1,BCL2,BCL2L1,BID,CCNE1,CCNE2,CDKN2B,E2F1,MAX,NFKB1,NFKBIA,PA2G4,PIK3CB,PIK3CD,PTEN,PTGS2,RXR,TRAF3</b>                                                                                                                                                   |
| S-methyl-5'-thioadenosine Degradation II           | 2Gy 2h           | 0.85                 | 1.00        | NaN          | MTAP                                                                                                                                                                                                                                                                 |
| Sonic Hedgehog Signaling                           | 2Gy 2h           | 0.00                 | 0.09        | NaN          | GLI3                                                                                                                                                                                                                                                                 |
| Sonic Hedgehog Signaling                           | 2Gy 4h           | 0.94                 | 0.46        | 0.00         | CCNB1,GLI3,GSK3B,PRKAR2A,PTCH1                                                                                                                                                                                                                                       |
| Sperm Motility                                     | 0.05Gy 4h        | 0.48                 | 0.06        | NaN          | JAK2,KIT,PRKCD,PRKCI,YES1                                                                                                                                                                                                                                            |
| Sperm Motility                                     | 2Gy 2h           | 0.00                 | 0.11        | 0.00         | EPHA2,EPHB3,EPHB4,MAP2K5,MERTK,PDE4D,PNPLA8,PRKCE,TWF1,TYK2                                                                                                                                                                                                          |
| Sperm Motility                                     | 2Gy 4h           | 0.00                 | 0.24        | -1.41        | ABL1,DDR1,EGFR,EPHA2,EPHB4,FLT1,ITPR2,JAK2,KIT,MAP2K1,MERTK,PDGFRA,PNPLA8,PRKAR2A,PRKCD,PRKCE,PRKCI,PRKD3,PTK2B,SLC12A2,SRC,YES1                                                                                                                                     |
| Spermine and Spermidine Degradation I              | 2Gy 2h           | 0.85                 | 1.00        | NaN          | SAT1                                                                                                                                                                                                                                                                 |
| Spermine and Spermidine Degradation I              | 2Gy 4h           | 0.60                 | 1.00        | NaN          | SAT1                                                                                                                                                                                                                                                                 |
| Sphingomyelin Metabolism                           | 2Gy 2h           | 0.58                 | 0.50        | NaN          | SGMS1                                                                                                                                                                                                                                                                |
| Sphingomyelin Metabolism                           | 2Gy 4h           | 0.36                 | 0.50        | NaN          | SGMS2                                                                                                                                                                                                                                                                |
| Sphingosine and Sphingosine-1-phosphate Metabolism | 0.05Gy 4h        | 1.08                 | 0.50        | NaN          | SGPP1                                                                                                                                                                                                                                                                |
| Sphingosine and Sphingosine-1-phosphate Metabolism | 2Gy 4h           | 0.36                 | 0.50        | NaN          | SGPP1                                                                                                                                                                                                                                                                |
| Sphingosine-1-phosphate Signaling                  | 0.05Gy 4h        | 0.48                 | 0.06        | NaN          | GNAI2,RHOA,RHOG                                                                                                                                                                                                                                                      |
| Sphingosine-1-phosphate Signaling                  | 2Gy 2h           | 1.19                 | 0.23        | 0.00         | CASP3,CASP8,CDC42,PDGFA,PIK3CB,PIK3CD,RAC1,RHOB,RHOQ,RND3,S1PR3                                                                                                                                                                                                      |
| Sphingosine-1-phosphate Signaling                  | 2Gy 4h           | 0.00                 | 0.23        | 0.00         | ADCY8,AKT1,CASP3,GNAI2,GNAI3,PDGFRA,PIK3CB,PIK3CD,PTK2B,RAC3,RHOA                                                                                                                                                                                                    |
| SPINK1 General Cancer Pathway                      | 0.05Gy 2h        | 0.69                 | 0.04        | NaN          | IL6                                                                                                                                                                                                                                                                  |
| SPINK1 General Cancer Pathway                      | 0.05Gy 4h        | 0.57                 | 0.08        | NaN          | JAK2,MT2A                                                                                                                                                                                                                                                            |
| SPINK1 General Cancer Pathway                      | 2Gy 2h           | 0.96                 | 0.25        | -0.82        | IL6,IL6R,PIK3CB,PIK3CD,RRAS2,TYK2                                                                                                                                                                                                                                    |
| <b>SPINK1 General Cancer Pathway</b>               | <b>2Gy 4h</b>    | <b>2.15</b>          | <b>0.50</b> | <b>-1.16</b> | <b>AKT1,EGFR,HRAS,IL6R,JAK2,KRAS,MAP2K1,MT1X,MT2A,PIK3CB,PIK3CD,RRAS2</b>                                                                                                                                                                                            |
| SPINK1 Pancreatic Cancer Pathway                   | 0.05Gy 4h        | 1.05                 | 0.17        | NaN          | TGFB1,TGFB1                                                                                                                                                                                                                                                          |
| SPINK1 Pancreatic Cancer Pathway                   | 2Gy 2h           | 0.00                 | 0.08        | NaN          | SMAD3                                                                                                                                                                                                                                                                |
| SPINK1 Pancreatic Cancer Pathway                   | 2Gy 4h           | 0.80                 | 0.42        | 0.45         | CPQ,SMAD2,SMAD3,TGFB1,TGFB1                                                                                                                                                                                                                                          |
| STAT3 Pathway                                      | 0.05Gy 2h        | 0.68                 | 0.02        | NaN          | MYC,SOCS3                                                                                                                                                                                                                                                            |
| STAT3 Pathway                                      | 0.05Gy 4h        | 0.74                 | 0.07        | -0.45        | BCL2,CDKN1A,JAK2,SOCS6,TGFB1,TGFB1                                                                                                                                                                                                                                   |
| STAT3 Pathway                                      | 2Gy 2h           | 0.70                 | 0.18        | 0.00         | CDKN1A,CISH,FGF2,IL4R,IL6R,MAPK8,MYC,PTPN2,RAC1,RRAS2,SOCS1,SOCS2,SOCS3,SOCS5,SOCS6,TYK2                                                                                                                                                                             |

| Ingenuity Canonical Pathways                                              | Model            | <b>-log(p-value)</b> | Ratio       | z-score      | Molecules                                                                                                                                                                       |
|---------------------------------------------------------------------------|------------------|----------------------|-------------|--------------|---------------------------------------------------------------------------------------------------------------------------------------------------------------------------------|
| STAT3 Pathway                                                             | 2Gy 4h           | 1.28                 | 0.33        | -0.82        | BCL2,BMPR2,CDKN1A,EGFR,FGF2,FLT1,GHR,HRAS,IL17RA,IL18R1,IL1R1,IL22RA1,IL4R,IL6R,IL6ST,JAK2,KRAS,MAP2K1,MAPK8,NGFR,PDGFRA,RRAS2,SOCS2,SOCS3,SOCS5,SOCS6,SOCS7,SRCT, TGFB1, TGFB1 |
| <b>Sumoylation Pathway</b>                                                | <b>0.05Gy 4h</b> | <b>2.12</b>          | <b>0.14</b> | <b>-0.45</b> | <b>FOS,MDM2,NR3C1,RHOA,RHOG,UBE2I</b>                                                                                                                                           |
| Sumoylation Pathway                                                       | 2Gy 2h           | 1.21                 | 0.24        | 0.38         | CDC42,FAS,MAPK8,MDM2,PCNA,RAC1,RHOB,RHOQ,RND3,SP100                                                                                                                             |
| <b>Sumoylation Pathway</b>                                                | <b>2Gy 4h</b>    | <b>1.71</b>          | <b>0.41</b> | <b>-0.58</b> | <b>ETS1,FAS,FOS,KDM1A,MAPK8,MDM2,NFKB1,NFKBIA,NR3C1,PCNA,RAC3,RHOA,SMAD4,SP1,STUB1,UBE2I,XIAP</b>                                                                               |
| Superoxide Radicals Degradation                                           | 2Gy 4h           | 0.26                 | 0.29        | NaN          | SOD1,SOD3                                                                                                                                                                       |
| Superpathway of Cholesterol Biosynthesis                                  | 2Gy 2h           | 1.05                 | 0.38        | NaN          | HMGCR,HMGCS1,SC5D                                                                                                                                                               |
| Superpathway of Cholesterol Biosynthesis                                  | 2Gy 4h           | 0.00                 | 0.25        | NaN          | HMGCR,HMGCS1                                                                                                                                                                    |
| Superpathway of Citrulline Metabolism                                     | 2Gy 2h           | 0.00                 | 0.10        | NaN          | OAT                                                                                                                                                                             |
| Superpathway of Citrulline Metabolism                                     | 2Gy 4h           | 0.00                 | 0.20        | NaN          | ALDH18A1,OAT                                                                                                                                                                    |
| Superpathway of D-myo-inositol (1,4,5)-trisphosphate Metabolism           | 2Gy 2h           | 0.27                 | 0.20        | NaN          | IMPA2                                                                                                                                                                           |
| Superpathway of D-myo-inositol (1,4,5)-trisphosphate Metabolism           | 2Gy 4h           | 0.00                 | 0.20        | NaN          | PTEN                                                                                                                                                                            |
| Superpathway of Geranylgeranyldiphosphate Biosynthesis I (via Mevalonate) | 2Gy 2h           | 1.27                 | 0.67        | NaN          | HMGCR,HMGCS1                                                                                                                                                                    |
| Superpathway of Geranylgeranyldiphosphate Biosynthesis I (via Mevalonate) | 2Gy 4h           | 0.80                 | 0.67        | NaN          | HMGCR,HMGCS1                                                                                                                                                                    |
| Superpathway of Inositol Phosphate Compounds                              | 0.05Gy 2h        | 0.57                 | 0.03        | NaN          | SOCS3                                                                                                                                                                           |
| Superpathway of Inositol Phosphate Compounds                              | 0.05Gy 4h        | 0.39                 | 0.06        | NaN          | CDC25C,PTPN13                                                                                                                                                                   |
| Superpathway of Inositol Phosphate Compounds                              | 2Gy 2h           | 0.50                 | 0.18        | -1.63        | CDC25B,DUSP1,PIK3CB,PIK3CD,PTPN2,SOCS3                                                                                                                                          |
| Superpathway of Inositol Phosphate Compounds                              | 2Gy 4h           | 0.74                 | 0.33        | 0.30         | CDC25B,DUSP1,NUDT11,PAWR,PIK3CB,PIK3CD,PPP1CA,PPP3CA,PTEN,PTPN13,SOCS3                                                                                                          |
| Superpathway of Melatonin Degradation                                     | 2Gy 4h           | 0.00                 | 0.05        | NaN          | CYP1B1                                                                                                                                                                          |
| Superpathway of Methionine Degradation                                    | 2Gy 4h           | 0.00                 | 0.20        | NaN          | DLD                                                                                                                                                                             |
| Superpathway of Serine and Glycine Biosynthesis I                         | 2Gy 4h           | 0.00                 | 0.20        | NaN          | PSPH                                                                                                                                                                            |
| Synaptic Long Term Depression                                             | 0.05Gy 4h        | 0.35                 | 0.05        | NaN          | GNAI2,PRKCD,PRKCI                                                                                                                                                               |
| Synaptic Long Term Depression                                             | 2Gy 2h           | 0.00                 | 0.10        | -0.82        | CACNA1A,GNAO1,PNPLA8,PPP2CA,PRKCE,RRAS2                                                                                                                                         |
| Synaptic Long Term Depression                                             | 2Gy 4h           | 0.31                 | 0.26        | -0.78        | CACNA1C,GNAI2,GNAI3,HRAS,ITPR2,KRAS,MAP2K1,NPR3,PNPLA8,PPP2CA,PRKCD,PRKCE,PRKCI,PRKD3,RRAS2                                                                                     |
| Synaptic Long Term Potentiation                                           | 0.05Gy 4h        | 0.22                 | 0.04        | NaN          | PRKCD,PRKCI                                                                                                                                                                     |
| Synaptic Long Term Potentiation                                           | 2Gy 2h           | 0.00                 | 0.13        | -0.82        | ATF4,CAMK2G,PPP3CC,PPP3R1,PRKCE,RRAS2                                                                                                                                           |
| <b>Synaptic Long Term Potentiation</b>                                    | <b>2Gy 4h</b>    | <b>1.85</b>          | <b>0.40</b> | <b>-1.41</b> | <b>ADCY8,ATF2,ATF4,CACNA1C,HRAS,ITPR2,KRAS,MAP2K1,PPP1CA,PPP3CA,PPP3CB,PPP3CC,PPP3R1,PRKAR2A,PRKCD,PRKCE,PRKCI,PRKD3,RRAS2</b>                                                  |
| Synaptogenesis Signaling Pathway                                          | 0.05Gy 2h        | 0.24                 | 0.01        | NaN          | RAB3A                                                                                                                                                                           |
| Synaptogenesis Signaling Pathway                                          | 0.05Gy 4h        | 0.47                 | 0.05        | 0.45         | EFNA4,MARCKS,PRKCD,RHOA,YES1                                                                                                                                                    |
| <b>Synaptogenesis Signaling Pathway</b>                                   | <b>2Gy 2h</b>    | <b>1.34</b>          | <b>0.21</b> | <b>-1.15</b> | <b>APOE,ATF4,BDNF,CAMK2G,CDC42,EFNB1,EPHA2,EPHB3,EPHB4,MARCKS,MTOR,PIK3CB,PIK3CD,PRKCE,RAB3A,RAC1,RRAS2,SOS1,STX16</b>                                                          |
| Synaptogenesis Signaling Pathway                                          | 2Gy 4h           | 0.91                 | 0.31        | 1.13         | ADCY8,AKT1,ATF2,ATF4,CFL1,CRK,CTNNB1,EFNB1,EPHA2,EPHB4,GSK3B,HRAS,HSPA8,KRAS,MARCKS,NECTIN1,PIK3CB,PIK3CD,PRKAR2A,PRKCD,PRKCE,RASGRF1,RHOA,RRAS2,SRCT,STXBP4,VLDLR,YES1         |
| <b>Systemic Lupus Erythematosus In B Cell Signaling Pathway</b>           | <b>0.05Gy 2h</b> | <b>1.48</b>          | <b>0.03</b> | <b>-1.00</b> | <b>IL11,IL12A,IL6,MYC</b>                                                                                                                                                       |

| Inguenuity Canonical Pathways                                   | Model            | $-\log(p\text{-value})$ | Ratio       | z-score      | Molecules                                                                                                                                                                                                                                                         |
|-----------------------------------------------------------------|------------------|-------------------------|-------------|--------------|-------------------------------------------------------------------------------------------------------------------------------------------------------------------------------------------------------------------------------------------------------------------|
| Systemic Lupus Erythematosus In B Cell Signaling Pathway        | 0.05Gy 4h        | 0.71                    | 0.06        | 0.00         | BCL2,FOS,JAK2,NFATC1,PRKCD,PRKCI,TGFB1,YES1                                                                                                                                                                                                                       |
| Systemic Lupus Erythematosus In B Cell Signaling Pathway        | 2Gy 2h           | 0.39                    | 0.15        | -1.34        | BCL2L1,BCL2L11,CXCL8,IL11,IL6,IL6R,MTOR,MYC,NFATC1,NFATC4,PDPK1,PIK3CB,PIK3CD,PPP3CC,PPP3R1,PRKCE,RAC1,RRAS2,SOS1,TYK2                                                                                                                                            |
| <b>Systemic Lupus Erythematosus In B Cell Signaling Pathway</b> | <b>2Gy 4h</b>    | <b>1.31</b>             | <b>0.32</b> | <b>0.00</b>  | <b>AKT1,BCL2,BCL2L1,CLCF1,CNTF,CTNNB1,FOS,FOXO3,GSK3B,HRAS,IFIH1,IFNGR1,IL12A,IL6R,IL6ST,IRF7,JAK2,KRAS,LIF,MAP2K1,MAP3K7,MAP4K4,NFAT5,NFATC1,NFKB1,PIK3CB,PIK3CD,PPP3CA,PPP3CB,PPP3CC,PPP3R1,PRKCD,PRKCE,PRKCI,PRKD3,RAC3,RRAS2,SRC,TGFB1,TNFSF10,TRAF3,YES1</b> |
| Systemic Lupus Erythematosus In T Cell Signaling Pathway        | 0.05Gy 2h        | 0.23                    | 0.01        | NaN          | IL6                                                                                                                                                                                                                                                               |
| Systemic Lupus Erythematosus In T Cell Signaling Pathway        | 0.05Gy 4h        | 0.45                    | 0.05        | 0.45         | FOS,GNAI2,RHOA,RHOG,YES1                                                                                                                                                                                                                                          |
| <b>Systemic Lupus Erythematosus In T Cell Signaling Pathway</b> | <b>2Gy 2h</b>    | <b>1.79</b>             | <b>0.23</b> | <b>0.22</b>  | <b>ATF4,BCL6,CASP3,CASP8,CDC42,FAS,IL6,MAP2K5,MTOR,PIK3CB,PIK3CD,PPP2CA,PPP3CC,PPP3R1,RAC1,RHOB,RHOQ,RND3,RRAS2,S1PR3,SOS1</b>                                                                                                                                    |
| <b>Systemic Lupus Erythematosus In T Cell Signaling Pathway</b> | <b>2Gy 4h</b>    | <b>1.84</b>             | <b>0.36</b> | <b>-0.17</b> | <b>AKT1,ATF2,ATF4,BCL6,CASP3,CD44,CREM,EZR,FAS,FOS,GADD45A,GNAI2,GNAI3,HLA-A,HRAS,KRAS,LEPR,MAP2K1,PIK3CB,PIK3CD,PPP2CA,PPP3CA,PPP3CB,PPP3CC,PPP3R1,RAB4A,RAC3,RHOA,ROCK1,ROCK2,RRAS2,SP1,YES1</b>                                                                |
| Systemic Lupus Erythematosus Signaling                          | 0.05Gy 2h        | 0.41                    | 0.02        | NaN          | IL6                                                                                                                                                                                                                                                               |
| Systemic Lupus Erythematosus Signaling                          | 0.05Gy 4h        | 0.00                    | 0.04        | NaN          | FOS,NFATC1                                                                                                                                                                                                                                                        |
| Systemic Lupus Erythematosus Signaling                          | 2Gy 2h           | 0.52                    | 0.17        | NaN          | IL6,IL6R,MTOR,NFATC1,NFATC4,PIK3CB,PIK3CD,RRAS2,SOS1                                                                                                                                                                                                              |
| Systemic Lupus Erythematosus Signaling                          | 2Gy 4h           | 0.00                    | 0.23        | NaN          | AKT1,CREM,FOS,HLA-E,HRAS,IL6R,KRAS,NFAT5,NFATC1,PIK3CB,PIK3CD,RRAS2                                                                                                                                                                                               |
| T Cell Exhaustion Signaling Pathway                             | 0.05Gy 2h        | 0.84                    | 0.03        | NaN          | IL12A,IL6                                                                                                                                                                                                                                                         |
| T Cell Exhaustion Signaling Pathway                             | 0.05Gy 4h        | 0.73                    | 0.07        | 0.00         | FOS,JAK2,NFATC1,TGFB1,TGFBR1                                                                                                                                                                                                                                      |
| T Cell Exhaustion Signaling Pathway                             | 2Gy 2h           | 1.14                    | 0.21        | -0.58        | ACVR2A,BCL6,CD274,IL6,IL6R,MAPK8,MTOR,NFATC1,NFATC4,PIK3CB,PIK3CD,PPP2CA,RRAS2,SAD3,TYK2                                                                                                                                                                          |
| <b>T Cell Exhaustion Signaling Pathway</b>                      | <b>2Gy 4h</b>    | <b>1.64</b>             | <b>0.36</b> | <b>-2.68</b> | <b>ACVR1,ACVR1B,ACVR2A,AKT1,BCL6,BMPR2,FOS,HLA-E,HRAS,IL12A,IL6R,JAK2,KRAS,MAPK8,NFAT5,NFATC1,PDCD1LG2,PIK3CB,PIK3CD,PPP2CA,RRAS2,SMAD2,SMAD3,TCF7,TGFB1,TGFBR1</b>                                                                                               |
| T Cell Receptor Signaling                                       | 0.05Gy 4h        | 0.57                    | 0.07        | NaN          | FOS,NFATC1,VAV2                                                                                                                                                                                                                                                   |
| <b>T Cell Receptor Signaling</b>                                | <b>2Gy 2h</b>    | <b>2.34</b>             | <b>0.30</b> | <b>NaN</b>   | <b>ELK1,IKBKB,IKBKE,MAPK8,NFATC1,NFATC4,PIK3CB,PIK3CD,PPP3CC,PPP3R1,RAC1,RRAS2,SOS1</b>                                                                                                                                                                           |
| <b>T Cell Receptor Signaling</b>                                | <b>2Gy 4h</b>    | <b>2.34</b>             | <b>0.44</b> | <b>NaN</b>   | <b>ELK1,FOS,HRAS,KRAS,MAP2K1,MAP3K1,MAPK8,NFAT5,NFATC1,NFKB1,NFKBIA,PIK3CB,PIK3CD,PPP3CA,PPP3CB,PPP3CC,PPP3R1,RRAS2,VAV2</b>                                                                                                                                      |
| T Helper Cell Differentiation                                   | 0.05Gy 2h        | 1.27                    | 0.05        | NaN          | IL12A,IL6                                                                                                                                                                                                                                                         |
| T Helper Cell Differentiation                                   | 0.05Gy 4h        | 0.29                    | 0.05        | NaN          | TGFB1,TGFBR1                                                                                                                                                                                                                                                      |
| T Helper Cell Differentiation                                   | 2Gy 2h           | 0.00                    | 0.13        | NaN          | BCL6,IL4R,IL6,IL6R,TNFRSF1B                                                                                                                                                                                                                                       |
| T Helper Cell Differentiation                                   | 2Gy 4h           | 0.54                    | 0.30        | NaN          | BCL6,IFNGR1,IL12A,IL18R1,IL4R,IL6R,IL6ST,NGFR,TGFB1,TGFBR1,TNFRSF11B,TNFRSF1B                                                                                                                                                                                     |
| TCA Cycle II (Eukaryotic)                                       | 2Gy 4h           | 0.80                    | 0.67        | NaN          | DLD,FH                                                                                                                                                                                                                                                            |
| <b>Tec Kinase Signaling</b>                                     | <b>0.05Gy 4h</b> | <b>3.85</b>             | <b>0.16</b> | <b>1.00</b>  | <b>ACTA2,FOS,GNAI2,GNG5,JAK2,PRKCD,PRKCI,RHOA,RHOG,VAV2,YES1</b>                                                                                                                                                                                                  |
| Tec Kinase Signaling                                            | 2Gy 2h           | 1.19                    | 0.21        | -1.16        | ACTA2,CDC42,FAS,GNAO1,ITGA5,MAPK8,PIK3CB,PIK3CD,PRKCE,RAC1,RHOB,RHOQ,RND3,TNFRSF10B,TYK2                                                                                                                                                                          |
| Tec Kinase Signaling                                            | 2Gy 4h           | 1.23                    | 0.34        | 0.69         | ACTA2,FAS,FOS,GNAI2,GNAI3,GNG5,JAK2,MAPK8,NFKB1,PIK3CB,PIK3CD,PRKCD,PRKCE,PRKCI,PRKD3,PTK2B,RAC3,RHOA,SRC,TNFRSF10A,TNFRSF10B,TNFSF10,VAV2,YES1                                                                                                                   |
| Telomerase Signaling                                            | 0.05Gy 2h        | 0.40                    | 0.02        | NaN          | MYC                                                                                                                                                                                                                                                               |

| Inguenuity Canonical Pathways                                      | Model            | -log(p-value) | Ratio       | z-score      | Molecules                                                                                                                                                   |
|--------------------------------------------------------------------|------------------|---------------|-------------|--------------|-------------------------------------------------------------------------------------------------------------------------------------------------------------|
| Telomerase Signaling                                               | 0.05Gy 4h        | 0.00          | 0.02        | NaN          | CDKN1A                                                                                                                                                      |
| Telomerase Signaling                                               | 2Gy 2h           | 0.69          | 0.19        | -1.89        | CDKN1A,HDAC6,MYC,PDPK1,PIK3CB,PIK3CD,PPP2CA,PTGES3,RRAS2,SOS1                                                                                               |
| Telomerase Signaling                                               | 2Gy 4h           | 1.04          | 0.34        | 0.54         | ABL1,AKT1,CDKN1A,E2F1,EGFR,ETS1,ETS2,HRAS,HSP90AB1,KRAS,MAP2K1,PIK3CB,PIK3CD,PP2CA,PTGES3,RRAS2,SP1,TEP1                                                    |
| Tetrahydrobiopterin Biosynthesis I                                 | 2Gy 2h           | 0.85          | 1.00        | NaN          | GCH1                                                                                                                                                        |
| Tetrahydrobiopterin Biosynthesis I                                 | 2Gy 4h           | 0.60          | 1.00        | NaN          | GCH1                                                                                                                                                        |
| Tetrahydrobiopterin Biosynthesis II                                | 2Gy 2h           | 0.85          | 1.00        | NaN          | GCH1                                                                                                                                                        |
| Tetrahydrobiopterin Biosynthesis II                                | 2Gy 4h           | 0.60          | 1.00        | NaN          | GCH1                                                                                                                                                        |
| <b>Tetrahydrofolate Salvage from 5,10-methenyltetrahydrofolate</b> | <b>0.05Gy 4h</b> | <b>1.37</b>   | <b>1.00</b> | <b>NaN</b>   | <b>MTHFD2</b>                                                                                                                                               |
| Tetrahydrofolate Salvage from 5,10-methenyltetrahydrofolate        | 2Gy 2h           | 0.85          | 1.00        | NaN          | MTHFD2                                                                                                                                                      |
| Tetrapyrrole Biosynthesis II                                       | 2Gy 2h           | 0.58          | 0.50        | NaN          | ALAS1                                                                                                                                                       |
| TGF- $\beta^2$ Signaling                                           | 0.05Gy 4h        | 1.15          | 0.09        | NaN          | BCL2,FOS,TGFB1,TGFBR1,VDR                                                                                                                                   |
| TGF- $\beta^2$ Signaling                                           | 2Gy 2h           | 0.94          | 0.21        | 0.00         | ACVR2A,CDC42,INHBA,MAPK8,RRAS2,RUNX2,SERPINE1,SMAD3,SMAD7,SOS1,VDR                                                                                          |
| <b>TGF-<math>\beta^2</math> Signaling</b>                          | <b>2Gy 4h</b>    | <b>4.42</b>   | <b>0.51</b> | <b>-1.09</b> | <b>K1,MAP3K7,MAPK8,RRAS2,SKI,SMAD2,SMAD3,SMAD4,SMAD6,SMAD7,TGFB1,TGFBR1,VDR,ZNF423</b>                                                                      |
| Th1 and Th2 Activation Pathway                                     | 0.05Gy 2h        | 1.25          | 0.03        | NaN          | IL12A,IL6,SOCS3                                                                                                                                             |
| Th1 and Th2 Activation Pathway                                     | 0.05Gy 4h        | 0.25          | 0.04        | NaN          | JAK2,NFATC1,TGFB1,TGFBR1                                                                                                                                    |
| Th1 and Th2 Activation Pathway                                     | 2Gy 2h           | 0.00          | 0.14        | NaN          | ACVR2A,CD274,IL4R,IL6,IL6R,JAG2,NFATC1,NFATC4,PIK3CB,PIK3CD,SOCS1,SOCS3,TYK2                                                                                |
| Th1 and Th2 Activation Pathway                                     | 2Gy 4h           | 0.00          | 0.22        | NaN          | ACVR1,ACVR1B,ACVR2A,BMPR2,ICAM1,IFNGR1,IL12A,IL18R1,IL4R,IL6R,JAK2,mir-29,NFATC1,NFKB1,NOTCH4,PIK3CB,PIK3CD,PSEN2,SOCS3,TGFB1,TGFBR1                        |
| <b>Th1 Pathway</b>                                                 | <b>0.05Gy 2h</b> | <b>1.72</b>   | <b>0.05</b> | <b>NaN</b>   | <b>IL12A,IL6,SOCS3</b>                                                                                                                                      |
| Th1 Pathway                                                        | 0.05Gy 4h        | 0.00          | 0.03        | NaN          | JAK2,NFATC1                                                                                                                                                 |
| Th1 Pathway                                                        | 2Gy 2h           | 0.43          | 0.16        | -1.41        | CD274,IL6,IL6R,NFATC1,NFATC4,PIK3CB,PIK3CD,SOCS1,SOCS3,TYK2                                                                                                 |
| Th1 Pathway                                                        | 2Gy 4h           | 0.00          | 0.23        | -1.16        | ICAM1,IFNGR1,IL12A,IL18R1,IL6R,JAK2,mir-29,NFATC1,NFKB1,NOTCH4,PIK3CB,PIK3CD,PSEN2,SOCS3                                                                    |
| <b>Th17 Activation Pathway</b>                                     | <b>0.05Gy 2h</b> | <b>2.18</b>   | <b>0.07</b> | <b>NaN</b>   | <b>IL12A,IL6,SOCS3</b>                                                                                                                                      |
| Th17 Activation Pathway                                            | 0.05Gy 4h        | 0.27          | 0.05        | NaN          | JAK2,NFATC1                                                                                                                                                 |
| Th17 Activation Pathway                                            | 2Gy 2h           | 0.90          | 0.21        | -1.41        | IL6,IL6R,MTOR,NFATC1,NFATC4,PTGER4,RUNX1,SOCS3,TYK2                                                                                                         |
| Th17 Activation Pathway                                            | 2Gy 4h           | 0.63          | 0.31        | -1.16        | HIF1A,HSP90AB1,IL12A,IL1R1,IL6R,JAK2,NFAT5,NFATC1,NFKB1,PTGER2,RORA,RUNX1,SOCS3                                                                             |
| Th2 Pathway                                                        | 0.05Gy 2h        | 0.84          | 0.03        | NaN          | IL12A,SOCS3                                                                                                                                                 |
| Th2 Pathway                                                        | 0.05Gy 4h        | 0.00          | 0.04        | NaN          | JAK2,TGFB1,TGFBR1                                                                                                                                           |
| Th2 Pathway                                                        | 2Gy 2h           | 0.00          | 0.10        | -1.13        | ACVR2A,IL4R,JAG2,PIK3CB,PIK3CD,SOCS3,TYK2                                                                                                                   |
| Th2 Pathway                                                        | 2Gy 4h           | 0.00          | 0.22        | 0.26         | ACVR1,ACVR1B,ACVR2A,BMPR2,ICAM1,IL12A,IL4R,JAK2,NFKB1,NOTCH4,PIK3CB,PIK3CD,PSEN2,SOCS3,TGFB1,TGFBR1                                                         |
| The Visual Cycle                                                   | 2Gy 4h           | 0.00          | 0.13        | NaN          | RDH11                                                                                                                                                       |
| Thioredoxin Pathway                                                | 2Gy 4h           | 0.60          | 1.00        | NaN          | TXN                                                                                                                                                         |
| Thrombin Signaling                                                 | 0.05Gy 4h        | 0.72          | 0.07        | 1.34         | GNAI2,GNG5,PRKCD,PRKCI,RHOA,RHOG                                                                                                                            |
| Thrombin Signaling                                                 | 2Gy 2h           | 0.85          | 0.19        | -1.60        | CAMK2G,CDC42,ELK1,GATA2,GATA6,GNAO1,IKBKB,PDPK1,PIK3CB,PIK3CD,PRKCE,RAC1,RHOB,RHOQ,RND3,RRAS2,SOS1                                                          |
| Thrombin Signaling                                                 | 2Gy 4h           | 0.71          | 0.29        | -0.60        | ADCY8,AKT1,ARHGFB3,CAMK1,EGFR,ELK1,GATA2,GNAI2,GNAI3,GNG5,HRAS,ITPR2,KRAS,MAP2K1,NFKB1,PIK3CB,PIK3CD,PRKCD,PRKCE,PRKCI,PRKD3,RAC3,RHOA,ROCK1,ROCK2,RRAS2,SR |
|                                                                    |                  |               |             |              | C                                                                                                                                                           |



| Ingenuity Canonical Pathways                               | Model            | <b>-log(p-value)</b> | Ratio       | z-score     | Molecules                                                                                                                |
|------------------------------------------------------------|------------------|----------------------|-------------|-------------|--------------------------------------------------------------------------------------------------------------------------|
| Thrombopoietin Signaling                                   | 0.05Gy 2h        | 0.56                 | 0.03        | NaN         | MYC                                                                                                                      |
| Thrombopoietin Signaling                                   | 0.05Gy 4h        | 1.28                 | 0.12        | 0.00        | FOS,JAK2,PRKCD,PRKCI                                                                                                     |
| Thrombopoietin Signaling                                   | 2Gy 2h           | 0.72                 | 0.21        | -1.89       | IRS2,MYC,PIK3CB,PIK3CD,PRKCE,RRAS2,SOS1                                                                                  |
| Thrombopoietin Signaling                                   | 2Gy 4h           | 0.92                 | 0.35        | 0.00        | FOS,HRAS,JAK2,KRAS,MAP2K1,PIK3CB,PIK3CD,PRKCD,PRKCE,PRKCI,PRKD3,RRAS2                                                    |
| Thyroid Cancer Signaling                                   | 0.05Gy 2h        | 0.56                 | 0.03        | NaN         | MYC                                                                                                                      |
| Thyroid Cancer Signaling                                   | 0.05Gy 4h        | 0.00                 | 0.03        | NaN         | RXR8                                                                                                                     |
| Thyroid Cancer Signaling                                   | 2Gy 2h           | 0.47                 | 0.18        | NaN         | BDNF,CXCL8,MYC,RRAS2,RXRA,RXR8                                                                                           |
| Thyroid Cancer Signaling                                   | 2Gy 4h           | 0.47                 | 0.29        | NaN         | CTNNB1,GDNF,HRAS,KRAS,LEF1,MAP2K1,RRAS2,RXR8,TCF4,TCF7                                                                   |
| Thyroid Hormone Biosynthesis                               | 2Gy 4h           | 0.60                 | 1.00        | NaN         | CTSD                                                                                                                     |
| <b>Tight Junction Signaling</b>                            | <b>0.05Gy 4h</b> | <b>2.04</b>          | <b>0.12</b> | <b>NaN</b>  | <b>ACTA2,FOS,HSF1,PRKCI,RHOA,TGFB1,TGFB1</b>                                                                             |
| Tight Junction Signaling                                   | 2Gy 2h           | 0.00                 | 0.11        | NaN         | ACTA2,CDC42,PPP2CA,RAC1,STX16,TNFRSF1B                                                                                   |
| Tight Junction Signaling                                   | 2Gy 4h           | 1.01                 | 0.33        | NaN         | ACTA2,AKT1,CTNNB1,FOS,HSF1,NECTIN1,NECTIN2,NFKB1,NGFR,PPP2CA,PRKAR2A,PRKCI,PTEN,RHOA,TGFB1,TGFB1,TJP1,TNFRSF11B,TNFRSF1B |
| TNFR1 Signaling                                            | 0.05Gy 4h        | 0.22                 | 0.05        | NaN         | FOS                                                                                                                      |
| <b>TNFR1 Signaling</b>                                     | <b>2Gy 2h</b>    | <b>2.92</b>          | <b>0.43</b> | <b>0.71</b> | <b>BIRC2,CASP3,CASP8,CDC42,IKBKB,IKBKE,MAPK8,RIPK1,TNFAIP3</b>                                                           |
| TNFR1 Signaling                                            | 2Gy 4h           | 1.25                 | 0.43        | 0.33        | BID,CASP3,FOS,MAP3K1,MAPK8,NFKB1,NFKBIA,RIPK1,XIAP                                                                       |
| TNFR2 Signaling                                            | 0.05Gy 4h        | 0.32                 | 0.07        | NaN         | FOS                                                                                                                      |
| <b>TNFR2 Signaling</b>                                     | <b>2Gy 2h</b>    | <b>1.91</b>          | <b>0.40</b> | <b>0.45</b> | <b>BIRC2,IKBKB,IKBKE,MAPK8,TNFAIP3,TNFRSF1B</b>                                                                          |
| TNFR2 Signaling                                            | 2Gy 4h           | 1.25                 | 0.47        | -0.38       | FOS,MAP3K1,MAPK8,NFKB1,NFKBIA,TNFRSF1B,XIAP                                                                              |
| Toll-like Receptor Signaling                               | 0.05Gy 2h        | 0.48                 | 0.02        | NaN         | IL12A                                                                                                                    |
| Toll-like Receptor Signaling                               | 0.05Gy 4h        | 0.00                 | 0.02        | NaN         | FOS                                                                                                                      |
| Toll-like Receptor Signaling                               | 2Gy 2h           | 0.00                 | 0.09        | 1.00        | ELK1,IKBKB,MAPK8,TNFAIP3                                                                                                 |
| Toll-like Receptor Signaling                               | 2Gy 4h           | 0.41                 | 0.28        | -1.13       | EIF2AK2,ELK1,FOS,IL12A,MAP3K1,MAP3K7,MAP4K4,MAPK8,NFKB1,NFKBIA,PPARA,UBC                                                 |
| TR/RXR Activation                                          | 0.05Gy 2h        | 0.42                 | 0.02        | NaN         | BCL3                                                                                                                     |
| TR/RXR Activation                                          | 0.05Gy 4h        | 0.00                 | 0.04        | NaN         | MDM2,RXR8                                                                                                                |
| TR/RXR Activation                                          | 2Gy 2h           | 0.77                 | 0.20        | NaN         | BCL3,MDM2,MTOR,NCOR2,PIK3CB,PIK3CD,PPARGC1A,RXRA,RXR8,SLC2A1                                                             |
| TR/RXR Activation                                          | 2Gy 4h           | 0.00                 | 0.22        | NaN         | AKT1,ENO1,HIF1A,LDLR,MDM2,NCOA2,PIK3CB,PIK3CD,RXR8,SLC2A1,THRB                                                           |
| Transcriptional Regulatory Network in Embryonic Stem Cells | 0.05Gy 4h        | 0.84                 | 0.13        | NaN         | REST,TRIM24                                                                                                              |
| Transcriptional Regulatory Network in Embryonic Stem Cells | 2Gy 2h           | 0.40                 | 0.19        | NaN         | GATA6,SMARCD1,TRIM24                                                                                                     |
| Transcriptional Regulatory Network in Embryonic Stem Cells | 2Gy 4h           | 0.00                 | 0.19        | NaN         | REST,SKIL,TRIM24                                                                                                         |
| TREM1 Signaling                                            | 0.05Gy 2h        | 0.48                 | 0.02        | NaN         | IL6                                                                                                                      |
| TREM1 Signaling                                            | 0.05Gy 4h        | 0.00                 | 0.02        | NaN         | JAK2                                                                                                                     |
| TREM1 Signaling                                            | 2Gy 2h           | 0.26                 | 0.14        | -0.82       | CCL2,CCL7,CXCL8,IL6,ITGA5,NOD1                                                                                           |
| TREM1 Signaling                                            | 2Gy 4h           | 0.00                 | 0.12        | -1.34       | AKT1,ICAM1,JAK2,NFKB1,NOD1                                                                                               |
| Triacylglycerol Biosynthesis                               | 0.05Gy 4h        | 0.39                 | 0.08        | NaN         | LPIN2                                                                                                                    |
| Triacylglycerol Biosynthesis                               | 2Gy 4h           | 0.00                 | 0.25        | NaN         | LPIN2,LPIN3,PLPP3                                                                                                        |
| Triacylglycerol Degradation                                | 2Gy 2h           | 0.28                 | 0.17        | NaN         | AARS1,LIPE                                                                                                               |
| Triacylglycerol Degradation                                | 2Gy 4h           | 0.45                 | 0.33        | 1.00        | AARS1,CES2,LIPE,PRDX6                                                                                                    |
| tRNA Charging                                              | 2Gy 2h           | 0.44                 | 0.33        | NaN         | AARS1                                                                                                                    |
| tRNA Charging                                              | 2Gy 4h           | 0.80                 | 0.67        | NaN         | AARS1,TARS1                                                                                                              |
| tRNA Splicing                                              | 2Gy 2h           | 0.50                 | 0.25        | NaN         | NAPEPLD,PDE4D                                                                                                            |
| tRNA Splicing                                              | 2Gy 4h           | 0.00                 | 0.13        | NaN         | APEX1                                                                                                                    |

| Inguenuity Canonical Pathways                        | Model            | <b>-log(p-value)</b> | Ratio       | z-score      | Molecules                                                                                                                                                    |
|------------------------------------------------------|------------------|----------------------|-------------|--------------|--------------------------------------------------------------------------------------------------------------------------------------------------------------|
| Tryptophan Degradation III (Eukaryotic)              | 2Gy 4h           | 0.24                 | 0.33        | NaN          | HSD17B10                                                                                                                                                     |
| Tumoricidal Function of Hepatic Natural Killer Cells | 2Gy 2h           | 0.50                 | 0.21        | NaN          | CASP3,CASP8,FAS                                                                                                                                              |
| Tumoricidal Function of Hepatic Natural Killer Cells | 2Gy 4h           | 0.95                 | 0.43        | NaN          | AIFM1,BID,CASP3,ENDO G,FAS,ICAM1                                                                                                                             |
| <b>TWEAK Signaling</b>                               | <b>2Gy 2h</b>    | <b>2.62</b>          | <b>0.47</b> | <b>0.38</b>  | <b>BIRC2,CASP3,CASP8,IKBKB,IKBKE,RIPK1,TNFRSF12A</b>                                                                                                         |
| <b>TWEAK Signaling</b>                               | <b>2Gy 4h</b>    | <b>1.76</b>          | <b>0.53</b> | <b>-0.71</b> | <b>BID,CASP3,NFKB1,NFKBIA,RIPK1,TNFRSF12A,TRAF3,XIAP</b>                                                                                                     |
| Type I Diabetes Mellitus Signaling                   | 0.05Gy 2h        | 1.03                 | 0.04        | NaN          | IL12A,SOCS3                                                                                                                                                  |
| Type I Diabetes Mellitus Signaling                   | 0.05Gy 4h        | 0.39                 | 0.05        | NaN          | BCL2,JAK2,SOCS6                                                                                                                                              |
| <b>Type I Diabetes Mellitus Signaling</b>            | <b>2Gy 2h</b>    | <b>1.43</b>          | <b>0.24</b> | <b>0.28</b>  | <b>CASP3,CASP8,FAS,IKBKB,IKBKE,MAPK8,RIPK1,SOCS1,SOCS2,SOCS3,SOCS5,SOCS6,TNFRSF1B</b>                                                                        |
| <b>Type I Diabetes Mellitus Signaling</b>            | <b>2Gy 4h</b>    | <b>2.01</b>          | <b>0.40</b> | <b>-0.45</b> | <b>BCL2,BID,CASP3,FAS,HLA-E,IFNGR1,IL12A,IL1R1,JAK2,MAP3K7,MAPK8,NFKB1,NFKBIA,NGFR,RIPK1,SOCS2,SOCS3,SOCS5,SOCS6,SOCS7,TNFRSF11B,TNFRSF1B</b>                |
| Type II Diabetes Mellitus Signaling                  | 0.05Gy 2h        | 0.33                 | 0.02        | NaN          | SOCS3                                                                                                                                                        |
| Type II Diabetes Mellitus Signaling                  | 0.05Gy 4h        | 0.27                 | 0.05        | NaN          | PRKCD,PRKCI,SOCS6                                                                                                                                            |
| <b>Type II Diabetes Mellitus Signaling</b>           | <b>2Gy 2h</b>    | <b>2.48</b>          | <b>0.27</b> | <b>-1.16</b> | <b>CACNA1A,CEBPB,IKBKB,IKBKE,IRS1,IRS2,MAPK8,MTOR,PDPK1,PIK3CB,PIK3CD,PRKCE,SOCS1,SOCS2,SOCS3,SOCS5,SOCS6,TNFRSF1B</b>                                       |
| <b>Type II Diabetes Mellitus Signaling</b>           | <b>2Gy 4h</b>    | <b>1.33</b>          | <b>0.35</b> | <b>-0.24</b> | <b>ADIPOR2,AKT1,CACNA1C,MAP3K1,MAP3K7,MAPK8,NFKB1,NFKBIA,NGFR,PIK3CB,PIK3CD,PKM,PRKCD,PRKCE,PRKCI,PRKD3,SOCS2,SOCS3,SOCS5,SOCS6,SOCS7,TNFRSF11B,TNFRSF1B</b> |
| Ubiquinol-10 Biosynthesis (Eukaryotic)               | 2Gy 4h           | 0.00                 | 0.17        | NaN          | CYP7B1                                                                                                                                                       |
| UDP-D-xylose and UDP-D-glucuronate Biosynthesis      | 2Gy 2h           | 0.85                 | 1.00        | NaN          | UGDH                                                                                                                                                         |
| UDP-N-acetyl-D-galactosamine Biosynthesis II         | 0.05Gy 4h        | 0.92                 | 0.33        | NaN          | GPI                                                                                                                                                          |
| UDP-N-acetyl-D-galactosamine Biosynthesis II         | 2Gy 4h           | 0.80                 | 0.67        | NaN          | GNPNAT1,GPI                                                                                                                                                  |
| UDP-N-acetyl-D-glucosamine Biosynthesis II           | 2Gy 4h           | 0.60                 | 1.00        | NaN          | GNPNAT1                                                                                                                                                      |
| Unfolded protein response                            | 0.05Gy 4h        | 0.00                 | 0.04        | NaN          | BCL2                                                                                                                                                         |
| Unfolded protein response                            | 2Gy 2h           | 0.83                 | 0.23        | 0.45         | ATF4,CEBPB,CEBPD,HSPA9,INSIG1,MAPK8                                                                                                                          |
| <b>Unfolded protein response</b>                     | <b>2Gy 4h</b>    | <b>2.83</b>          | <b>0.54</b> | <b>1.73</b>  | <b>ATF4,ATF6,BCL2,CALR,CEBPD,CEBPG,DDIT3,HSPA6,HSPA8,INSIG1,MAPK8,P4HB,SYVN1,VCP</b>                                                                         |
| Uridine-5'-phosphate Biosynthesis                    | 2Gy 2h           | 0.85                 | 1.00        | NaN          | CAD                                                                                                                                                          |
| UVA-Induced MAPK Signaling                           | 0.05Gy 4h        | 0.00                 | 0.03        | NaN          | FOS                                                                                                                                                          |
| UVA-Induced MAPK Signaling                           | 2Gy 2h           | 1.15                 | 0.25        | NaN          | BCL2L1,CASP3,MAPK8,MTOR,PARP2,PIK3CB,PIK3CD,RRAS2                                                                                                            |
| <b>UVA-Induced MAPK Signaling</b>                    | <b>2Gy 4h</b>    | <b>1.43</b>          | <b>0.41</b> | <b>-0.82</b> | <b>ATM,BCL2L1,CASP3,EGFR,FOS,HRAS,KRAS,MAPK8,PARP2,PARP9,PIK3CB,PIK3CD,RRAS2</b>                                                                             |
| UVB-Induced MAPK Signaling                           | 0.05Gy 4h        | 0.99                 | 0.11        | NaN          | FOS,PRKCD,PRKCI                                                                                                                                              |
| UVB-Induced MAPK Signaling                           | 2Gy 2h           | 0.48                 | 0.19        | -1.34        | MAPK8,MTOR,PIK3CB,PIK3CD,PRKCE                                                                                                                               |
| UVB-Induced MAPK Signaling                           | 2Gy 4h           | 1.28                 | 0.41        | 0.30         | AKT1,EGFR,FOS,MAP2K1,MAPK8,PIK3CB,PIK3CD,PRKCD,PRKCE,PRKCI,PRKD3                                                                                             |
| UVC-Induced MAPK Signaling                           | 0.05Gy 4h        | 1.15                 | 0.13        | NaN          | FOS,PRKCD,PRKCI                                                                                                                                              |
| UVC-Induced MAPK Signaling                           | 2Gy 2h           | 0.00                 | 0.13        | NaN          | MAPK8,PRKCE,RRAS2                                                                                                                                            |
| <b>UVC-Induced MAPK Signaling</b>                    | <b>2Gy 4h</b>    | <b>2.34</b>          | <b>0.52</b> | <b>0.00</b>  | <b>EGFR,FOS,HRAS,KRAS,MAP2K1,MAPK8,PRKCD,PRKCE,PRKCI,PRKD3,RRAS2,SRC</b>                                                                                     |
| Valine Degradation I                                 | 2Gy 4h           | 0.36                 | 0.50        | NaN          | DLD                                                                                                                                                          |
| <b>VDR/RXR Activation</b>                            | <b>0.05Gy 2h</b> | <b>1.74</b>          | <b>0.05</b> | <b>NaN</b>   | <b>CDKN1B,HES1,IL12A</b>                                                                                                                                     |
| VDR/RXR Activation                                   | 0.05Gy 4h        | 0.95                 | 0.08        | 0.45         | CDKN1A,PRKCD,PRKCI,RXR,RXR,VDR                                                                                                                               |
| <b>VDR/RXR Activation</b>                            | <b>2Gy 2h</b>    | <b>1.40</b>          | <b>0.23</b> | <b>0.63</b>  | <b>CCNC,CDKN1A,CDKN1B,CEBPB,HES1,KLF4,MXD1,NCOR2,PDGFA,PRKCE,RUNX2,RXRA,RXR,RXR,VDR</b>                                                                      |
| VDR/RXR Activation                                   | 2Gy 4h           | 0.00                 | 0.23        | 1.00         | CDKN1A,GADD45A,IGFBP6,IL12A,KLF4,NCOA2,PRKCD,PRKCE,PRKCI,PRKD3,RXR,RXR,SP1,THBD,VDR                                                                          |

| Ingenuity Canonical Pathways                    | Model         | -log(p-value) | Ratio       | z-score      | Molecules                                                                                                                                                                        |
|-------------------------------------------------|---------------|---------------|-------------|--------------|----------------------------------------------------------------------------------------------------------------------------------------------------------------------------------|
| VEGF Family Ligand-Receptor Interactions        | 0.05Gy 4h     | 0.59          | 0.07        | NaN          | FOS,PRKCD,PRKCI                                                                                                                                                                  |
| VEGF Family Ligand-Receptor Interactions        | 2Gy 2h        | 0.00          | 0.12        | -1.34        | PIK3CB,PIK3CD,PRKCE,RRAS2,SOS1                                                                                                                                                   |
| VEGF Family Ligand-Receptor Interactions        | 2Gy 4h        | 1.10          | 0.36        | 0.54         | AKT1,FLT1,FOS,HRAS,KRAS,MAP2K1,NRP1,PGF,PIK3CB,PIK3CD,PRKCD,PRKCE,PRKCI,PRKD3,RRAS2                                                                                              |
| VEGF Signaling                                  | 0.05Gy 4h     | 0.24          | 0.04        | NaN          | ACTA2,BCL2                                                                                                                                                                       |
| VEGF Signaling                                  | 2Gy 2h        | 0.00          | 0.13        | -0.82        | ACTA2,BCL2L1,PIK3CB,PIK3CD,RRAS2,SOS1                                                                                                                                            |
| <b>VEGF Signaling</b>                           | <b>2Gy 4h</b> | <b>1.73</b>   | <b>0.40</b> | <b>-0.24</b> | <b>ACTA2,AKT1,BCL2,BCL2L1,FLT1,FOXO3,HIF1A,HRAS,KRAS,MAP2K1,PGF,PIK3CB,PIK3CD,PTK2B,ROCK1,ROCK2,RRAS2,SRC</b>                                                                    |
| Virus Entry via Endocytic Pathways              | 0.05Gy 4h     | 0.45          | 0.06        | NaN          | ACTA2,PRKCD,PRKCI                                                                                                                                                                |
| Virus Entry via Endocytic Pathways              | 2Gy 2h        | 1.08          | 0.22        | NaN          | ACTA2,AP3B1,AP3S1,CD55,CDC42,ITGA5,PIK3CB,PIK3CD,PRKCE,RAC1,RRAS2                                                                                                                |
| Virus Entry via Endocytic Pathways              | 2Gy 4h        | 0.79          | 0.32        | NaN          | ABL1,ACTA2,AP3M1,HLA-E,HRAS,ITGB8,KRAS,PIK3CB,PIK3CD,PRKCD,PRKCE,PRKCI,PRKD3,RAC3,RRAS2,SRC                                                                                      |
| Vitamin-C Transport                             | 2Gy 2h        | 0.22          | 0.17        | NaN          | SLC2A1                                                                                                                                                                           |
| Vitamin-C Transport                             | 2Gy 4h        | 0.77          | 0.50        | NaN          | GLRX,SLC2A1,TXN                                                                                                                                                                  |
| White Adipose Tissue Browning Pathway           | 0.05Gy 4h     | 0.00          | 0.03        | NaN          | RARG,RXRB                                                                                                                                                                        |
| White Adipose Tissue Browning Pathway           | 2Gy 2h        | 0.48          | 0.17        | -2.53        | ATF4,BDNF,CACNA1A,CEBPB,LIPE,PPARGC1A,PRDM16,RARG,RXRA,RXRB                                                                                                                      |
| White Adipose Tissue Browning Pathway           | 2Gy 4h        | 0.00          | 0.18        | -0.91        | ADCY8,ATF2,ATF4,CACNA1C,LIPE,NRF1,PPARA,PRKAR2A,RARA,RXRB,THRB                                                                                                                   |
| Wnt/Ca+ pathway                                 | 0.05Gy 4h     | 0.20          | 0.04        | NaN          | NFATC1                                                                                                                                                                           |
| Wnt/Ca+ pathway                                 | 2Gy 2h        | 0.00          | 0.13        | NaN          | ATF4,NFATC1,NFATC4                                                                                                                                                               |
| <b>Wnt/Ca+ pathway</b>                          | <b>2Gy 4h</b> | <b>1.39</b>   | <b>0.44</b> | <b>-1.90</b> | <b>ATF2,ATF4,AXIN1,FZD1,GSK3B,NFAT5,NFATC1,NFKB1,PPP3CA,WNT5A</b>                                                                                                                |
| Wnt/ $\beta$ -catenin Signaling                 | 0.05Gy 2h     | 0.26          | 0.01        | NaN          | MYC                                                                                                                                                                              |
| Wnt/ $\beta$ -catenin Signaling                 | 0.05Gy 4h     | 0.34          | 0.05        | NaN          | MDM2,RARG,TGFB1,TGFBR1                                                                                                                                                           |
| Wnt/ $\beta$ -catenin Signaling                 | 2Gy 2h        | 0.00          | 0.10        | -0.82        | ACVR2A,GNAO1,MDM2,MYC,PPP2CA,RARG,SOX8,TLE1                                                                                                                                      |
| <b>Wnt/<math>\beta</math>-catenin Signaling</b> | <b>2Gy 4h</b> | <b>1.91</b>   | <b>0.37</b> | <b>1.00</b>  | <b>ACVR1,ACVR1B,ACVR2A,AKT1,APPL1,AXIN1,BMPR2,CD44,CDKN2A,CSNK2B,CTNNB1,DKK1,FZD1,GJA1,GSK3B,LEF1,MAP3K7,MDM2,PPP2CA,RARA,SOX8,SOX9,SRC,TCF4,TCF7,TGFB1,TGFB1,TLE1,UBC,WNT5A</b> |
| Xenobiotic Metabolism Signaling                 | 0.05Gy 2h     | 0.00          | 0.01        | NaN          | IL6                                                                                                                                                                              |
| Xenobiotic Metabolism Signaling                 | 0.05Gy 4h     | 0.00          | 0.03        | NaN          | HS6ST1,PRKCD,PRKCI                                                                                                                                                               |
| Xenobiotic Metabolism Signaling                 | 2Gy 2h        | 0.68          | 0.17        | NaN          | CAMK2G,CHST11,CHST2,CUL3,HMOX1,HS6ST1,IL6,MAP2K5,MAPK7,MAPK8,NCOR2,PIK3CB,PIK3CD,PPARGC1A,PPP2CA,PRKCE,PTGES3,RRAS2,RXRA                                                         |
| Xenobiotic Metabolism Signaling                 | 2Gy 4h        | 0.00          | 0.23        | NaN          | ALDH18A1,CAMK1,CES2,CYP1B1,GCLC,GSTP1,HMOX1,HRAS,HS6ST1,HSP90AB1,KRAS,MAP2K1,MAP3K1,MAP3K7,MAPK8,NFKB1,PIK3CB,PIK3CD,PPP2CA,PRKCD,PRKCE,PRKCI,PRKD3,PTGES3,RRAS2,SOD3            |

Bold: significant pathways with  $-\log(p\text{-value}) \geq 1.30$ ; blue: inactivated pathway with  $z\text{-score} \leq -2$ ; red: activated pathway with  $z\text{-score} \geq 2$ ; Abbreviations: Not a Number (NaN).
